# Supplementary material for: Downregulation of glial genes involved in synaptic function mitigates Huntington's disease pathogenesis
Source: eLife. 2021 Apr 19;10:e64564. doi: 10.7554/eLife.64564 (PMC8149125; doi:10.7554/eLife.64564)
Supplement: Figure 1—source data 1. [file elife-64564-fig1-data1.xlsx]

## Sheet: Sheet1
flyUpNeuron	flyDownNeuron	flyUpGlia	flyDownGlia	humanUp_Entrez	humanDown_Entrez	mouseUp_Entrez	mouseDown_Entrez
FBgn0039890	FBgn0031516	FBgn0000003	FBgn0000024	780	2978	11298	11307
FBgn0031516	FBgn0037562	FBgn0000008	FBgn0000038	4735	2665	11305	11308
FBgn0036804	FBgn0033162	FBgn0000042	FBgn0000039	23435	377	11306	11352
FBgn0004108	FBgn0004108	FBgn0000043	FBgn0000042	56910	9045	11370	11421
FBgn0038545	FBgn0026872	FBgn0000044	FBgn0000044	7528	2987	11432	11429
FBgn0051704	FBgn0000579	FBgn0000045	FBgn0000045	4670	1327	11444	11430
FBgn0020439	FBgn0004839	FBgn0000046	FBgn0000046	2339	3094	11480	11441
FBgn0034407	FBgn0039941	FBgn0000047	FBgn0000047	8992	5573	11486	11443
FBgn0037560	FBgn0037560	FBgn0000052	FBgn0000071	4478	1173	11490	11459
FBgn0037533	FBgn0037533	FBgn0000053	FBgn0000075	9948	1213	11500	11461
FBgn0051760	FBgn0051760	FBgn0000055	FBgn0000083	9761	7534	11502	11465
FBgn0037875	FBgn0010292	FBgn0000056	FBgn0000099	1465	2752	11532	11472
FBgn0004406	FBgn0263083	FBgn0000057	FBgn0000119	10397	3939	11534	11477
FBgn0033128	FBgn0020416	FBgn0000064	FBgn0000120	6282	9804	11538	11482
FBgn0017456	FBgn0053192	FBgn0000075	FBgn0000139	967	5518	11544	11484
FBgn0034534	FBgn0011768	FBgn0000078	FBgn0000152	6678	2280	11548	11489
FBgn0002174	FBgn0000253	FBgn0000079	FBgn0000157	3337	10121	11565	11491
FBgn0036198	FBgn0036202	FBgn0000083	FBgn0000180	9741	4076	11600	11496
FBgn0261954	FBgn0013688	FBgn0000092	FBgn0000206	975	10097	11604	11501
FBgn0031359	FBgn0039125	FBgn0000100	FBgn0000241	754	5230	11624	11504
FBgn0032650	FBgn0034454	FBgn0000109	FBgn0000244	2934	6612	11671	11515
FBgn0027885	FBgn0039006	FBgn0000115	FBgn0000250	11014	2782	11692	11518
FBgn0058178	FBgn0028526	FBgn0000116	FBgn0000273	10577	5901	11732	11519
FBgn0020415	FBgn0033821	FBgn0000120	FBgn0000274	37	5695	11736	11539
FBgn0035715	FBgn0026417	FBgn0000121	FBgn0000276	22919	50	11739	11540
FBgn0263111	FBgn0034990	FBgn0000150	FBgn0000277	2876	5048	11747	11549
FBgn0083940	FBgn0037489	FBgn0000158	FBgn0000278	1200	539	11749	11552
FBgn0040942	FBgn0033518	FBgn0000181	FBgn0000279	4926	7167	11750	11553
FBgn0035995	FBgn0036187	FBgn0000206	FBgn0000289	4144	10525	11764	11564
FBgn0030668	FBgn0002936	FBgn0000212	FBgn0000303	5757	3015	11768	11566
FBgn0037328	FBgn0035334	FBgn0000244	FBgn0000307	468	7385	11778	11567
FBgn0002121	FBgn0040942	FBgn0000251	FBgn0000313	308	1337	11784	11569
FBgn0026597	FBgn0033304	FBgn0000253	FBgn0000320	4953	8079	11787	11576
FBgn0022213	FBgn0030668	FBgn0000261	FBgn0000359	8826	527	11798	11607
FBgn0259240	FBgn0034968	FBgn0000276	FBgn0000360	4170	6386	11799	11640
FBgn0036772	FBgn0026737	FBgn0000277	FBgn0000363	7009	6160	11815	11652
FBgn0052484	FBgn0052484	FBgn0000303	FBgn0000370	3920	4190	11819	11656
FBgn0260653	FBgn0032507	FBgn0000308	FBgn0000382	5908	5160	11835	11658
FBgn0032507	FBgn0000559	FBgn0000313	FBgn0000395	4134	309	11867	11676
FBgn0050456	FBgn0015360	FBgn0000317	FBgn0000404	9588	10096	11877	11705
FBgn0036373	FBgn0040237	FBgn0000326	FBgn0000406	10768	7533	11881	11717
FBgn0030964	FBgn0034165	FBgn0000370	FBgn0000409	9798	11034	11883	11758
FBgn0038144	FBgn0038347	FBgn0000392	FBgn0000422	2316	10904	11891	11761
FBgn0000359	FBgn0026585	FBgn0000394	FBgn0000427	55905	23646	11899	11766
FBgn0028855	FBgn0036813	FBgn0000395	FBgn0000439	6281	10949	11906	11769
FBgn0033483	FBgn0013467	FBgn0000406	FBgn0000442	389	5954	11907	11774
FBgn0038947	FBgn0038400	FBgn0000414	FBgn0000448	6745	9375	11927	11781
FBgn0031042	FBgn0028855	FBgn0000416	FBgn0000454	23022	526	11931	11790
FBgn0047133	FBgn0032157	FBgn0000439	FBgn0000459	3133	378	11947	11816
FBgn0036910	FBgn0032069	FBgn0000473	FBgn0000477	3895	10857	11949	11838
FBgn0027836	FBgn0039915	FBgn0000477	FBgn0000489	8407	9867	11951	11841
FBgn0033194	FBgn0030230	FBgn0000492	FBgn0000492	694	396	11964	11842
FBgn0035476	FBgn0004635	FBgn0000497	FBgn0000527	3959	4043	11966	11847
FBgn0259247	FBgn0011336	FBgn0000500	FBgn0000533	6520	5510	11975	11848
FBgn0036004	FBgn0027836	FBgn0000524	FBgn0000535	7913	4714	11981	11857
FBgn0000108	FBgn0031913	FBgn0000529	FBgn0000536	3150	55611	11983	11858
FBgn0035244	FBgn0051800	FBgn0000533	FBgn0000556	3983	9167	11984	11865
FBgn0003071	FBgn0035476	FBgn0000536	FBgn0000559	5479	5702	11994	11886
FBgn0024187	FBgn0261403	FBgn0000556	FBgn0000562	710	5478	12009	11898
FBgn0003204	FBgn0038029	FBgn0000559	FBgn0000565	10970	4698	12015	11909
FBgn0033134	FBgn0033853	FBgn0000564	FBgn0000566	10628	2026	12017	11928
FBgn0039508	FBgn0003071	FBgn0000565	FBgn0000568	301	10494	12033	11933
FBgn0032817	FBgn0050460	FBgn0000566	FBgn0000575	10606	506	12035	11938
FBgn0015924	FBgn0034162	FBgn0000568	FBgn0000578	3728	8507	12036	11941
FBgn0030058	FBgn0036511	FBgn0000579	FBgn0000588	9669	10625	12038	11974
FBgn0026787	FBgn0033134	FBgn0000592	FBgn0000633	4267	7345	12041	11988
FBgn0259201	FBgn0039508	FBgn0000594	FBgn0000636	120	55041	12055	11991
FBgn0260936	FBgn0261086	FBgn0000615	FBgn0000711	1843	9791	12068	12000
FBgn0036770	FBgn0036578	FBgn0000635	FBgn0000719	9491	10159	12069	12029
FBgn0034670	FBgn0260936	FBgn0000636	FBgn0000723	2040	9868	12070	12032
FBgn0002306	FBgn0261714	FBgn0000658	FBgn0000826	6599	6723	12091	12054
FBgn0005198	FBgn0010412	FBgn0000715	FBgn0000964	6651	7334	12121	12111
FBgn0030990	FBgn0030990	FBgn0000721	FBgn0001078	5829	381	12122	12123
FBgn0037351	FBgn0037351	FBgn0000964	FBgn0001089	3956	9296	12125	12153
FBgn0052226	FBgn0005410	FBgn0001083	FBgn0001090	3693	5412	12140	12156
FBgn0033884	FBgn0051955	FBgn0001086	FBgn0001098	5355	6844	12151	12161
FBgn0036134	FBgn0026563	FBgn0001089	FBgn0001104	3115	4830	12168	12162
FBgn0051072	FBgn0036997	FBgn0001091	FBgn0001114	4780	55854	12175	12166
FBgn0028482	FBgn0260857	FBgn0001092	FBgn0001124	7078	1347	12183	12167
FBgn0028644	FBgn0039714	FBgn0001105	FBgn0001128	4836	23463	12209	12169
FBgn0005410	FBgn0033915	FBgn0001112	FBgn0001137	8531	8906	12223	12176
FBgn0058263	FBgn0035024	FBgn0001114	FBgn0001145	3490	52	12234	12181
FBgn0011763	FBgn0037146	FBgn0001124	FBgn0001168	2773	400	12237	12182
FBgn0262518	FBgn0029866	FBgn0001125	FBgn0001186	8140	5682	12286	12192
FBgn0026563	FBgn0033490	FBgn0001128	FBgn0001189	6238	56941	12287	12217
FBgn0036997	FBgn0010053	FBgn0001134	FBgn0001208	3065	7163	12291	12227
FBgn0038213	FBgn0020655	FBgn0001138	FBgn0001218	1654	1958	12293	12263
FBgn0039714	FBgn0261792	FBgn0001142	FBgn0001223	5358	955	12305	12265
FBgn0041629	FBgn0015222	FBgn0001149	FBgn0001227	1488	8508	12308	12267
FBgn0035490	FBgn0003124	FBgn0001150	FBgn0001228	6625	2037	12336	12288
FBgn0029866	FBgn0016650	FBgn0001168	FBgn0001234	7832	8872	12337	12290
FBgn0052267	FBgn0027087	FBgn0001179	FBgn0001235	6856	10289	12339	12294
FBgn0030266	FBgn0263093	FBgn0001187	FBgn0001250	633	4722	12340	12295
FBgn0036115	FBgn0041710	FBgn0001197	FBgn0001253	22913	1345	12367	12296
FBgn0013305	FBgn0261649	FBgn0001208	FBgn0001256	397	55884	12380	12297
FBgn0036734	FBgn0036886	FBgn0001215	FBgn0001257	3491	9467	12387	12299
FBgn0032910	FBgn0262110	FBgn0001218	FBgn0001259	23478	949	12393	12300
FBgn0033592	FBgn0250906	FBgn0001219	FBgn0001263	26118	4072	12405	12307
FBgn0028708	FBgn0004888	FBgn0001223	FBgn0001285	307	4738	12418	12313
FBgn0027619	FBgn0038142	FBgn0001224	FBgn0001291	10541	10953	12421	12314
FBgn0035889	FBgn0085431	FBgn0001225	FBgn0001296	55752	5527	12424	12315
FBgn0262110	FBgn0030007	FBgn0001226	FBgn0001297	10581	10447	12447	12322
FBgn0250906	FBgn0051665	FBgn0001229	FBgn0001301	2012	10412	12450	12323
FBgn0004888	FBgn0032002	FBgn0001230	FBgn0001316	9341	10769	12460	12326
FBgn0050005	FBgn0000500	FBgn0001233	FBgn0001323	79602	10576	12461	12331
FBgn0035178	FBgn0035187	FBgn0001234	FBgn0001324	678	892	12464	12343
FBgn0039648	FBgn0040259	FBgn0001248	FBgn0001404	3482	10193	12465	12348
FBgn0000500	FBgn0031228	FBgn0001257	FBgn0001565	26227	523	12466	12349
FBgn0040259	FBgn0051454	FBgn0001258	FBgn0001612	23471	1389	12469	12354
FBgn0086251	FBgn0034232	FBgn0001259	FBgn0001941	26020	10314	12479	12366
FBgn0003257	FBgn0031069	FBgn0001263	FBgn0001961	7431	3035	12492	12368
FBgn0039049	FBgn0003175	FBgn0001291	FBgn0001991	6414	23466	12493	12370
FBgn0085428	FBgn0053639	FBgn0001297	FBgn0001995	1809	3419	12521	12373
FBgn0003392	FBgn0035969	FBgn0001311	FBgn0002021	847	4706	12525	12385
FBgn0050495	FBgn0025352	FBgn0001316	FBgn0002069	9416	8533	12530	12390
FBgn0027339	FBgn0261592	FBgn0001942	FBgn0002521	9261	10920	12544	12395
FBgn0033919	FBgn0030887	FBgn0001961	FBgn0002542	3725	4061	12555	12396
FBgn0033241	FBgn0038734	FBgn0001965	FBgn0002543	10105	10381	12558	12398
FBgn0038404	FBgn0031414	FBgn0001967	FBgn0002567	5547	10659	12563	12406
FBgn0262477	FBgn0039856	FBgn0001977	FBgn0002570	4792	5504	12576	12411
FBgn0038771	FBgn0037408	FBgn0001987	FBgn0002571	10146	6880	12577	12419
FBgn0027601	FBgn0040733	FBgn0001989	FBgn0002576	347	60496	12578	12444
FBgn0002937	FBgn0023212	FBgn0002022	FBgn0002645	6117	5590	12583	12449
FBgn0040074	FBgn0033225	FBgn0002031	FBgn0002709	1499	8522	12616	12452
FBgn0036309	FBgn0040074	FBgn0002284	FBgn0002733	56681	27122	12651	12454
FBgn0039466	FBgn0051084	FBgn0002306	FBgn0002773	3916	27020	12661	12457
FBgn0008651	FBgn0022069	FBgn0002431	FBgn0002778	25932	7102	12662	12458
FBgn0040658	FBgn0046296	FBgn0002526	FBgn0002789	6652	26037	12675	12468
FBgn0262510	FBgn0038095	FBgn0002528	FBgn0002868	3398	6812	12705	12489
FBgn0033834	FBgn0039690	FBgn0002531	FBgn0002872	5420	9556	12721	12495
FBgn0000053	FBgn0030049	FBgn0002562	FBgn0002891	2195	4522	12725	12497
FBgn0024227	FBgn0033358	FBgn0002563	FBgn0002921	10212	613	12727	12504
FBgn0023535	FBgn0035544	FBgn0002565	FBgn0002924	3654	10919	12737	12509
FBgn0003969	FBgn0019936	FBgn0002579	FBgn0002936	8243	7320	12752	12511
FBgn0031592	FBgn0000053	FBgn0002590	FBgn0002937	302	5066	12757	12514
FBgn0051663	FBgn0039226	FBgn0002593	FBgn0002938	9989	3093	12764	12517
FBgn0046876	FBgn0029898	FBgn0002607	FBgn0002973	3636	5718	12805	12531
FBgn0085434	FBgn0000279	FBgn0002622	FBgn0003041	223	5997	12814	12552
FBgn0040588	FBgn0023535	FBgn0002645	FBgn0003053	800	10409	12821	12554
FBgn0062463	FBgn0035272	FBgn0002652	FBgn0003060	8870	23761	12824	12561
FBgn0053301	FBgn0027081	FBgn0002719	FBgn0003068	8087	4905	12832	12562
FBgn0010638	FBgn0000121	FBgn0002780	FBgn0003076	684	23640	12834	12564
FBgn0034053	FBgn0053908	FBgn0002787	FBgn0003082	3371	3321	12840	12565
FBgn0064237	FBgn0046876	FBgn0002789	FBgn0003129	11252	5530	12841	12566
FBgn0032407	FBgn0004050	FBgn0002873	FBgn0003149	3655	5532	12847	12567
FBgn0015571	FBgn0024995	FBgn0002899	FBgn0003159	7076	3423	12858	12569
FBgn0035767	FBgn0053301	FBgn0002909	FBgn0003162	2697	1176	12879	12570
FBgn0036726	FBgn0037819	FBgn0002930	FBgn0003165	4082	9663	12892	12572
FBgn0037547	FBgn0010638	FBgn0002932	FBgn0003175	9231	3421	12912	12575
FBgn0037344	FBgn0038473	FBgn0002938	FBgn0003189	7805	6616	12914	12606
FBgn0041605	FBgn0030925	FBgn0002939	FBgn0003209	1994	5528	12936	12607
FBgn0038652	FBgn0034053	FBgn0002940	FBgn0003231	7175	1400	12937	12611
FBgn0016976	FBgn0064237	FBgn0002968	FBgn0003248	10299	9806	12939	12614
FBgn0002576	FBgn0260468	FBgn0002985	FBgn0003249	6446	3156	12941	12628
FBgn0004919	FBgn0036993	FBgn0003011	FBgn0003255	929	5580	12942	12640
FBgn0085282	FBgn0030502	FBgn0003016	FBgn0003256	5756	6782	12943	12647
FBgn0033062	FBgn0259716	FBgn0003053	FBgn0003261	1889	22839	12946	12653
FBgn0033184	FBgn0053531	FBgn0003060	FBgn0003268	10797	51573	12964	12654
FBgn0003149	FBgn0033985	FBgn0003067	FBgn0003301	5721	2029	12972	12655
FBgn0004369	FBgn0004919	FBgn0003068	FBgn0003328	51582	9874	12974	12659
FBgn0058232	FBgn0085282	FBgn0003074	FBgn0003339	5970	5440	12982	12669
FBgn0027581	FBgn0028833	FBgn0003076	FBgn0003346	1717	8799	13001	12672
FBgn0033461	FBgn0038725	FBgn0003090	FBgn0003353	165	1948	13016	12677
FBgn0034732	FBgn0033184	FBgn0003116	FBgn0003356	3930	5604	13019	12700
FBgn0027620	FBgn0033224	FBgn0003117	FBgn0003357	26509	4008	13039	12709
FBgn0037941	FBgn0031384	FBgn0003118	FBgn0003358	10276	6390	13043	12715
FBgn0033742	FBgn0053516	FBgn0003134	FBgn0003366	3315	8731	13048	12723
FBgn0038017	FBgn0035287	FBgn0003137	FBgn0003380	2202	5567	13056	12724
FBgn0063498	FBgn0039417	FBgn0003141	FBgn0003386	23429	23518	13075	12750
FBgn0053230	FBgn0031814	FBgn0003165	FBgn0003388	822	9475	13123	12751
FBgn0015776	FBgn0004369	FBgn0003174	FBgn0003390	9208	2354	13139	12759
FBgn0051956	FBgn0037941	FBgn0003178	FBgn0003392	6907	27338	13178	12775
FBgn0003495	FBgn0035267	FBgn0003187	FBgn0003396	5445	5019	13191	12785
FBgn0037889	FBgn0261995	FBgn0003189	FBgn0003415	3597	23530	13193	12801
FBgn0028956	FBgn0033423	FBgn0003231	FBgn0003429	84722	1725	13195	12810
FBgn0033292	FBgn0260456	FBgn0003249	FBgn0003447	10160	1627	13207	12815
FBgn0037466	FBgn0003116	FBgn0003250	FBgn0003460	55186	6921	13244	12819
FBgn0000286	FBgn0033739	FBgn0003274	FBgn0003475	4299	291	13347	12870
FBgn0031267	FBgn0002524	FBgn0003295	FBgn0003479	8502	9648	13350	12876
FBgn0011259	FBgn0053202	FBgn0003308	FBgn0003483	8099	3251	13353	12877
FBgn0261834	FBgn0034959	FBgn0003321	FBgn0003499	10519	9917	13356	12890
FBgn0039936	FBgn0035112	FBgn0003328	FBgn0003502	10095	287	13382	12894
FBgn0262512	FBgn0036887	FBgn0003346	FBgn0003515	2180	5300	13383	12904
FBgn0028343	FBgn0262794	FBgn0003360	FBgn0003557	10180	8803	13392	12916
FBgn0261844	FBgn0002719	FBgn0003372	FBgn0003638	5236	4729	13405	12918
FBgn0262794	FBgn0250850	FBgn0003430	FBgn0003659	4678	2941	13424	12925
FBgn0001112	FBgn0011660	FBgn0003459	FBgn0003710	4651	11075	13426	12950
FBgn0020637	FBgn0037921	FBgn0003462	FBgn0003716	1956	3632	13427	12953
FBgn0002719	FBgn0085395	FBgn0003463	FBgn0003733	9969	117178	13476	12971
FBgn0030941	FBgn0029720	FBgn0003483	FBgn0003748	3799	9910	13483	12978
FBgn0000447	FBgn0039617	FBgn0003495	FBgn0003861	23013	5799	13495	12985
FBgn0261574	FBgn0034911	FBgn0003499	FBgn0003862	6480	7390	13498	13004
FBgn0003339	FBgn0035880	FBgn0003502	FBgn0003863	6993	10286	13506	13010
FBgn0259704	FBgn0032430	FBgn0003507	FBgn0003867	5782	51363	13511	13018
FBgn0004240	FBgn0032848	FBgn0003512	FBgn0003886	7082	9900	13544	13024
FBgn0052816	FBgn0035374	FBgn0003514	FBgn0003888	2052	10516	13592	13025
FBgn0032178	FBgn0030615	FBgn0003525	FBgn0003896	4057	10059	13605	13030
FBgn0030615	FBgn0034405	FBgn0003559	FBgn0003943	1942	9040	13626	13033
FBgn0260400	FBgn0003512	FBgn0003600	FBgn0003965	5927	2185	13627	13046
FBgn0034405	FBgn0028534	FBgn0003656	FBgn0003969	26064	3800	13629	13051
FBgn0263197	FBgn0035266	FBgn0003660	FBgn0003984	8500	1612	13640	13052
FBgn0053180	FBgn0030973	FBgn0003676	FBgn0003996	3949	2550	13641	13087
FBgn0035266	FBgn0002543	FBgn0003731	FBgn0003997	6385	4130	13669	13108
FBgn0035158	FBgn0051183	FBgn0003748	FBgn0004045	5360	11215	13682	13115
FBgn0028394	FBgn0086674	FBgn0003861	FBgn0004047	329	2744	13690	13116
FBgn0000405	FBgn0003482	FBgn0003867	FBgn0004055	9592	10300	13723	13121
FBgn0004910	FBgn0032780	FBgn0003884	FBgn0004102	9414	11041	13799	13124
FBgn0032783	FBgn0032783	FBgn0003885	FBgn0004108	706	4728	13800	13131
FBgn0038465	FBgn0038465	FBgn0003887	FBgn0004133	7450	8869	13804	13134
FBgn0040324	FBgn0033735	FBgn0003891	FBgn0004167	5977	5601	13837	13136
FBgn0032444	FBgn0259734	FBgn0003941	FBgn0004168	8895	55312	13839	13138
FBgn0033874	FBgn0024365	FBgn0003942	FBgn0004179	10226	6310	13840	13164
FBgn0033735	FBgn0051793	FBgn0003943	FBgn0004192	25	10589	13844	13170
FBgn0027507	FBgn0052446	FBgn0003944	FBgn0004198	8780	23229	13858	13175
FBgn0035104	FBgn0053969	FBgn0003961	FBgn0004240	25937	6416	13865	13176
FBgn0011283	FBgn0085397	FBgn0003965	FBgn0004242	8574	9653	13872	13179
FBgn0001186	FBgn0031858	FBgn0003996	FBgn0004359	3475	1633	13982	13198
FBgn0039728	FBgn0031558	FBgn0004003	FBgn0004366	7716	6990	13983	13199
FBgn0031537	FBgn0031998	FBgn0004045	FBgn0004368	9766	5797	14009	13200
FBgn0003255	FBgn0004390	FBgn0004047	FBgn0004369	5725	22920	14017	13349
FBgn0037996	FBgn0042201	FBgn0004057	FBgn0004378	3985	9270	14025	13358
FBgn0053969	FBgn0003358	FBgn0004066	FBgn0004387	3910	8604	14038	13371
FBgn0039178	FBgn0035059	FBgn0004087	FBgn0004390	10123	2119	14042	13384
FBgn0037504	FBgn0039874	FBgn0004108	FBgn0004391	9415	23362	14048	13385
FBgn0043903	FBgn0002570	FBgn0004132	FBgn0004394	6535	11072	14051	13388
FBgn0010309	FBgn0037007	FBgn0004169	FBgn0004395	10902	51362	14062	13396
FBgn0004390	FBgn0052183	FBgn0004177	FBgn0004396	6566	3797	14069	13397
FBgn0263133	FBgn0035344	FBgn0004191	FBgn0004397	9129	1487	14070	13400
FBgn0042201	FBgn0029849	FBgn0004197	FBgn0004406	5872	5634	14073	13418
FBgn0039874	FBgn0022268	FBgn0004237	FBgn0004431	23564	8514	14077	13435
FBgn0002570	FBgn0061356	FBgn0004363	FBgn0004435	2633	6049	14082	13437
FBgn0043884	FBgn0261258	FBgn0004364	FBgn0004436	10274	9823	14084	13445
FBgn0053508	FBgn0034422	FBgn0004397	FBgn0004462	1512	4753	14085	13449
FBgn0036040	FBgn0039280	FBgn0004403	FBgn0004507	6720	23531	14107	13488
FBgn0033174	FBgn0025687	FBgn0004404	FBgn0004511	7374	9743	14113	13489
FBgn0022268	FBgn0259744	FBgn0004430	FBgn0004512	23321	4311	14129	13491
FBgn0001227	FBgn0036557	FBgn0004432	FBgn0004513	2171	7162	14156	13492
FBgn0061356	FBgn0033685	FBgn0004435	FBgn0004516	4147	6252	14158	13516
FBgn0051678	FBgn0031590	FBgn0004449	FBgn0004569	4601	22859	14164	13543
FBgn0051174	FBgn0026268	FBgn0004456	FBgn0004575	84747	10231	14165	13559
FBgn0031632	FBgn0038681	FBgn0004465	FBgn0004587	865	10651	14167	13560
FBgn0032906	FBgn0037976	FBgn0004507	FBgn0004606	12	4023	14186	13601
FBgn0085772	FBgn0019982	FBgn0004512	FBgn0004607	54741	8634	14190	13609
FBgn0035241	FBgn0036756	FBgn0004513	FBgn0004618	4820	22876	14208	13616
FBgn0031263	FBgn0030159	FBgn0004554	FBgn0004620	7071	4712	14211	13638
FBgn0025687	FBgn0038271	FBgn0004556	FBgn0004622	7073	23017	14226	13642
FBgn0036742	FBgn0036493	FBgn0004567	FBgn0004623	3429	4711	14228	13643
FBgn0041780	FBgn0035364	FBgn0004574	FBgn0004624	7398	56902	14231	13650
FBgn0259744	FBgn0005655	FBgn0004598	FBgn0004635	2531	9896	14235	13653
FBgn0039719	FBgn0031107	FBgn0004623	FBgn0004638	7994	5116	14248	13654
FBgn0036433	FBgn0033214	FBgn0004629	FBgn0004644	1622	7111	14251	13655
FBgn0010223	FBgn0035643	FBgn0004636	FBgn0004646	1545	9377	14252	13656
FBgn0005640	FBgn0001114	FBgn0004646	FBgn0004647	6764	7172	14256	13681
FBgn0031700	FBgn0035921	FBgn0004649	FBgn0004648	4853	5577	14266	13711
FBgn0036666	FBgn0025615	FBgn0004654	FBgn0004652	6256	6376	14272	13712
FBgn0038326	FBgn0051974	FBgn0004666	FBgn0004657	5209	3708	14317	13713
FBgn0028695	FBgn0033882	FBgn0004687	FBgn0004687	28951	22902	14357	13716
FBgn0037976	FBgn0037228	FBgn0004698	FBgn0004698	3300	55322	14360	13728
FBgn0011747	FBgn0050118	FBgn0004797	FBgn0004784	6744	5937	14362	13731
FBgn0262519	FBgn0030208	FBgn0004811	FBgn0004795	1719	9828	14370	13733
FBgn0019982	FBgn0083991	FBgn0004838	FBgn0004852	8673	412	14371	13803
FBgn0037720	FBgn0033875	FBgn0004839	FBgn0004859	4638	7164	14389	13805
FBgn0030159	FBgn0261261	FBgn0004859	FBgn0004876	203	605	14394	13807
FBgn0086346	FBgn0262838	FBgn0004867	FBgn0004882	6284	7447	14396	13819
FBgn0036493	FBgn0037546	FBgn0004868	FBgn0004885	2990	1716	14401	13821
FBgn0031107	FBgn0011576	FBgn0004878	FBgn0004893	2059	2983	14404	13841
FBgn0260228	FBgn0050022	FBgn0004888	FBgn0004910	5352	10188	14419	13842
FBgn0034985	FBgn0005612	FBgn0004908	FBgn0004914	4067	22924	14426	13846
FBgn0039925	FBgn0085294	FBgn0004914	FBgn0004919	7128	6197	14432	13849
FBgn0034049	FBgn0024980	FBgn0004924	FBgn0004921	3709	22911	14450	13850
FBgn0051019	FBgn0025709	FBgn0004926	FBgn0004957	7456	7443	14453	13857
FBgn0038549	FBgn0016119	FBgn0005278	FBgn0005322	86	88	14455	13859
FBgn0051974	FBgn0037975	FBgn0005391	FBgn0005386	467	104	14467	13866
FBgn0259226	FBgn0030451	FBgn0005533	FBgn0005391	4864	22841	14470	13870
FBgn0020261	FBgn0262603	FBgn0005558	FBgn0005427	558	6447	14473	13875
FBgn0015229	FBgn0038129	FBgn0005585	FBgn0005536	10140	9922	14544	13876
FBgn0037228	FBgn0261444	FBgn0005592	FBgn0005561	8349	10479	14545	13924
FBgn0033875	FBgn0030511	FBgn0005593	FBgn0005585	3459	5909	14567	13996
FBgn0003862	FBgn0034688	FBgn0005613	FBgn0005612	4052	6919	14570	14000
FBgn0031542	FBgn0259238	FBgn0005614	FBgn0005619	8974	384	14571	14007
FBgn0261239	FBgn0037548	FBgn0005649	FBgn0005630	9322	771	14583	14043
FBgn0050022	FBgn0033100	FBgn0005655	FBgn0005636	2634	6857	14584	14050
FBgn0032949	FBgn0041630	FBgn0005660	FBgn0005640	23224	10681	14588	14057
FBgn0039008	FBgn0032698	FBgn0005670	FBgn0005659	9780	7857	14590	14066
FBgn0033067	FBgn0015777	FBgn0005672	FBgn0005660	6507	10129	14618	14104
FBgn0037838	FBgn0010612	FBgn0005677	FBgn0005670	3689	4900	14635	14115
FBgn0030451	FBgn0261385	FBgn0005777	FBgn0005672	54838	5090	14660	14132
FBgn0004191	FBgn0051475	FBgn0008635	FBgn0005674	4026	6604	14677	14166
FBgn0032774	FBgn0028422	FBgn0010038	FBgn0005771	183	132	14678	14169
FBgn0037989	FBgn0028985	FBgn0010039	FBgn0008651	10928	5138	14682	14171
FBgn0037143	FBgn0053980	FBgn0010040	FBgn0008654	5825	7280	14683	14174
FBgn0259238	FBgn0010329	FBgn0010041	FBgn0010019	6259	1036	14688	14183
FBgn0037548	FBgn0010770	FBgn0010042	FBgn0010039	5519	8936	14694	14205
FBgn0038047	FBgn0260954	FBgn0010043	FBgn0010053	54541	140465	14696	14218
FBgn0028419	FBgn0083956	FBgn0010044	FBgn0010114	7466	6253	14701	14227
FBgn0010612	FBgn0031478	FBgn0010052	FBgn0010173	2956	2643	14704	14232
FBgn0002622	FBgn0026170	FBgn0010053	FBgn0010217	274	51454	14705	14236
FBgn0031460	FBgn0035090	FBgn0010078	FBgn0010222	7525	4826	14706	14238
FBgn0034693	FBgn0027657	FBgn0010105	FBgn0010225	6662	11258	14718	14247
FBgn0010401	FBgn0034935	FBgn0010114	FBgn0010241	11329	1020	14719	14254
FBgn0035500	FBgn0001216	FBgn0010173	FBgn0010246	713	1114	14731	14257
FBgn0033635	FBgn0040813	FBgn0010197	FBgn0010303	3059	10636	14733	14263
FBgn0003090	FBgn0024491	FBgn0010198	FBgn0010309	4594	9145	14745	14268
FBgn0031478	FBgn0036017	FBgn0010213	FBgn0010314	23303	8470	14751	14269
FBgn0034935	FBgn0024236	FBgn0010217	FBgn0010316	10144	5999	14755	14282
FBgn0001216	FBgn0029685	FBgn0010222	FBgn0010357	22836	10484	14772	14284
FBgn0030798	FBgn0000099	FBgn0010225	FBgn0010359	5996	7188	14775	14289
FBgn0260794	FBgn0026576	FBgn0010226	FBgn0010388	51421	65055	14788	14293
FBgn0002528	FBgn0051296	FBgn0010235	FBgn0010389	10434	9746	14804	14313
FBgn0087041	FBgn0033548	FBgn0010238	FBgn0010391	1535	4037	14805	14319
FBgn0036147	FBgn0085784	FBgn0010246	FBgn0010399	5796	8536	14823	14339
FBgn0034061	FBgn0034796	FBgn0010263	FBgn0010401	22856	4744	14824	14365
FBgn0010222	FBgn0010590	FBgn0010265	FBgn0010414	4814	341	14853	14368
FBgn0039309	FBgn0054041	FBgn0010278	FBgn0010415	9060	55885	14860	14369
FBgn0036783	FBgn0032729	FBgn0010282	FBgn0010423	9903	9762	14865	14375
FBgn0003747	FBgn0039735	FBgn0010288	FBgn0010424	7869	23641	14873	14381
FBgn0039703	FBgn0000556	FBgn0010314	FBgn0010425	4643	9118	14874	14385
FBgn0039689	FBgn0038292	FBgn0010315	FBgn0010434	4087	6622	14886	14391
FBgn0034796	FBgn0036620	FBgn0010341	FBgn0010473	29994	2596	14897	14397
FBgn0002962	FBgn0037749	FBgn0010348	FBgn0010482	7058	79095	14912	14403
FBgn0032729	FBgn0039232	FBgn0010352	FBgn0010501	7040	115	14924	14420
FBgn0262527	FBgn0016047	FBgn0010381	FBgn0010607	1436	2039	14950	14431
FBgn0031232	FBgn0004914	FBgn0010382	FBgn0010611	1936	5534	14964	14457
FBgn0035193	FBgn0034182	FBgn0010383	FBgn0010620	9924	9844	15024	14489
FBgn0031528	FBgn0085192	FBgn0010385	FBgn0010651	7159	29902	15115	14528
FBgn0000556	FBgn0003300	FBgn0010387	FBgn0010709	604	5170	15116	14533
FBgn0040271	FBgn0017566	FBgn0010391	FBgn0010741	2628	4644	15165	14534
FBgn0085317	FBgn0036627	FBgn0010397	FBgn0010768	6275	1917	15168	14538
FBgn0262867	FBgn0053129	FBgn0010408	FBgn0010786	4646	9764	15183	14539
FBgn0030053	FBgn0002733	FBgn0010409	FBgn0010877	4854	10966	15185	14548
FBgn0051992	FBgn0051495	FBgn0010411	FBgn0011020	7572	3631	15239	14555
FBgn0036186	FBgn0039089	FBgn0010417	FBgn0011202	10263	3897	15254	14573
FBgn0016047	FBgn0035976	FBgn0010421	FBgn0011204	7094	8927	15258	14594
FBgn0039727	FBgn0033913	FBgn0010425	FBgn0011205	9130	9016	15259	14599
FBgn0036597	FBgn0035282	FBgn0010433	FBgn0011211	3660	10752	15275	14600
FBgn0035282	FBgn0003748	FBgn0010435	FBgn0011224	51317	1742	15374	14608
FBgn0036299	FBgn0053527	FBgn0010497	FBgn0011230	9710	5218	15379	14613
FBgn0003748	FBgn0010114	FBgn0010516	FBgn0011259	477	11007	15404	14629
FBgn0062978	FBgn0030431	FBgn0010531	FBgn0011284	25805	5569	15423	14634
FBgn0031335	FBgn0032297	FBgn0010548	FBgn0011286	6814	7347	15424	14645
FBgn0031319	FBgn0001120	FBgn0010549	FBgn0011288	7050	10873	15425	14670
FBgn0051103	FBgn0030420	FBgn0010551	FBgn0011296	858	6715	15429	14673
FBgn0034517	FBgn0035753	FBgn0010590	FBgn0011297	3280	3775	15450	14674
FBgn0004512	FBgn0040087	FBgn0010591	FBgn0011305	2591	4884	15463	14680
FBgn0085767	FBgn0034253	FBgn0010611	FBgn0011556	23593	491	15467	14681
FBgn0085237	FBgn0034612	FBgn0010612	FBgn0011570	1000	11197	15468	14693
FBgn0260755	FBgn0083953	FBgn0010620	FBgn0011581	256364	8030	15481	14697
FBgn0034253	FBgn0051343	FBgn0010621	FBgn0011582	10106	2051	15488	14708
FBgn0262148	FBgn0030966	FBgn0010638	FBgn0011591	25776	9829	15512	14711
FBgn0053205	FBgn0003557	FBgn0010651	FBgn0011592	6303	55800	15560	14712
FBgn0033972	FBgn0261575	FBgn0010741	FBgn0011603	10404	9783	15563	14724
FBgn0005390	FBgn0024996	FBgn0010747	FBgn0011642	19	5141	15569	14732
FBgn0243516	FBgn0087005	FBgn0010750	FBgn0011659	6653	23047	15571	14738
FBgn0052350	FBgn0014865	FBgn0010803	FBgn0011661	10507	29114	15587	14739
FBgn0261575	FBgn0036769	FBgn0011016	FBgn0011666	2670	3376	15931	14748
FBgn0033873	FBgn0004192	FBgn0011205	FBgn0011672	11183	4675	15944	14758
FBgn0037879	FBgn0022382	FBgn0011211	FBgn0011674	22882	3131	15980	14773
FBgn0020503	FBgn0010225	FBgn0011217	FBgn0011676	8481	9854	16069	14782
FBgn0087005	FBgn0039868	FBgn0011227	FBgn0011695	10974	2775	16145	14787
FBgn0036915	FBgn0053120	FBgn0011230	FBgn0011701	1783	9737	16149	14789
FBgn0035410	FBgn0262125	FBgn0011260	FBgn0011739	9839	2009	16161	14797
FBgn0040102	FBgn0032005	FBgn0011272	FBgn0011742	9873	9254	16164	14803
FBgn0040239	FBgn0032100	FBgn0011274	FBgn0011746	6502	27107	16165	14806
FBgn0028856	FBgn0023170	FBgn0011280	FBgn0011747	3480	1641	16193	14809
FBgn0016975	FBgn0040398	FBgn0011283	FBgn0011764	51704	5778	16319	14810
FBgn0041342	FBgn0051098	FBgn0011293	FBgn0011766	4281	8379	16328	14813
FBgn0024252	FBgn0033717	FBgn0011296	FBgn0011774	2263	5126	16329	14816
FBgn0030697	FBgn0003380	FBgn0011336	FBgn0011817	22837	7091	16330	14852
FBgn0040752	FBgn0041342	FBgn0011361	FBgn0011818	9332	2762	16341	14859
FBgn0036727	FBgn0015393	FBgn0011455	FBgn0011834	596	9148	16351	14862
FBgn0003372	FBgn0259171	FBgn0011555	FBgn0011837	5311	9521	16363	14866
FBgn0259220	FBgn0037312	FBgn0011570	FBgn0012037	6239	6664	16370	14867
FBgn0260243	FBgn0039151	FBgn0011576	FBgn0012042	8659	5798	16372	14884
FBgn0027561	FBgn0261599	FBgn0011581	FBgn0012344	3707	9892	16392	14894
FBgn0013767	FBgn0037001	FBgn0011584	FBgn0013305	2014	5001	16396	14904
FBgn0033631	FBgn0038366	FBgn0011638	FBgn0013307	6925	576	16399	14919
FBgn0051826	FBgn0040364	FBgn0011640	FBgn0013308	6503	5864	16400	14945
FBgn0000241	FBgn0010041	FBgn0011692	FBgn0013334	25802	5217	16410	14962
FBgn0028974	FBgn0034756	FBgn0011695	FBgn0013348	63931	8851	16411	14979
FBgn0040507	FBgn0034564	FBgn0011703	FBgn0013718	51747	9732	16418	14998
FBgn0034504	FBgn0029755	FBgn0011704	FBgn0013733	8019	135	16430	14999
FBgn0000244	FBgn0037071	FBgn0011705	FBgn0013750	8850	10150	16432	15000
FBgn0041181	FBgn0250757	FBgn0011708	FBgn0013763	9846	1949	16467	15013
FBgn0036022	FBgn0036935	FBgn0011722	FBgn0013767	7412	440	16469	15077
FBgn0038070	FBgn0022288	FBgn0011726	FBgn0013770	5293	23542	16491	15108
FBgn0039537	FBgn0262614	FBgn0011745	FBgn0013771	1756	549	16517	15112
FBgn0040993	FBgn0039537	FBgn0011754	FBgn0013813	10379	3682	16519	15118
FBgn0024740	FBgn0039472	FBgn0011768	FBgn0013948	9843	5915	16524	15160
FBgn0034440	FBgn0024740	FBgn0011769	FBgn0013949	9411	51172	16532	15191
FBgn0053056	FBgn0013773	FBgn0011770	FBgn0013955	22846	535	16551	15193
FBgn0033063	FBgn0026079	FBgn0011774	FBgn0013984	22880	9751	16558	15194
FBgn0052138	FBgn0052137	FBgn0011828	FBgn0013987	10529	50649	16560	15199
FBgn0259164	FBgn0045038	FBgn0011837	FBgn0013988	9111	2258	16561	15200
FBgn0031737	FBgn0034094	FBgn0012034	FBgn0013995	1052	4741	16564	15212
FBgn0035078	FBgn0031737	FBgn0012036	FBgn0013998	1593	8577	16568	15213
FBgn0035346	FBgn0035078	FBgn0012037	FBgn0014000	8987	1463	16571	15227
FBgn0004055	FBgn0031093	FBgn0012042	FBgn0014006	8323	1183	16576	15228
FBgn0038341	FBgn0028920	FBgn0013269	FBgn0014018	5074	6712	16578	15242
FBgn0038567	FBgn0050381	FBgn0013272	FBgn0014019	1902	1212	16579	15247
FBgn0003638	FBgn0035708	FBgn0013275	FBgn0014073	4129	2786	16589	15257
FBgn0011760	FBgn0263251	FBgn0013276	FBgn0014133	9749	1174	16593	15260
FBgn0025790	FBgn0050431	FBgn0013277	FBgn0014135	5613	5110	16594	15288
FBgn0026257	FBgn0033192	FBgn0013278	FBgn0014141	6788	1690	16597	15312
FBgn0013772	FBgn0033317	FBgn0013279	FBgn0014380	5920	22895	16649	15331
FBgn0033753	FBgn0030932	FBgn0013305	FBgn0014388	745	9980	16650	15356
FBgn0003710	FBgn0003067	FBgn0013307	FBgn0014396	8459	273	16678	15357
FBgn0053816	FBgn0032502	FBgn0013325	FBgn0014417	7169	3757	16706	15368
FBgn0033029	FBgn0036988	FBgn0013432	FBgn0014455	9819	119	16763	15370
FBgn0029681	FBgn0039283	FBgn0013467	FBgn0014467	3176	7799	16765	15382
FBgn0052536	FBgn0027582	FBgn0013469	FBgn0014469	2791	2571	16773	15384
FBgn0052594	FBgn0037410	FBgn0013563	FBgn0014859	10912	2743	16782	15444
FBgn0030617	FBgn0022160	FBgn0013685	FBgn0014863	7305	10458	16796	15451
FBgn0037030	FBgn0014427	FBgn0013720	FBgn0014865	2309	1644	16801	15460
FBgn0260938	FBgn0030136	FBgn0013746	FBgn0014906	8460	3798	16826	15461
FBgn0250786	FBgn0033378	FBgn0013763	FBgn0014930	1645	9796	16840	15478
FBgn0039120	FBgn0034793	FBgn0013772	FBgn0015001	2766	4330	16854	15511
FBgn0033697	FBgn0030607	FBgn0013773	FBgn0015010	5783	10675	16880	15525
FBgn0015269	FBgn0033250	FBgn0013953	FBgn0015011	1105	1780	16881	15529
FBgn0261836	FBgn0039290	FBgn0013954	FBgn0015033	5698	5274	16886	15531
FBgn0058006	FBgn0032373	FBgn0013972	FBgn0015034	9895	2891	16890	15551
FBgn0032484	FBgn0028684	FBgn0013981	FBgn0015037	4756	9472	16891	15552
FBgn0030607	FBgn0036007	FBgn0013983	FBgn0015038	27333	9715	16898	15557
FBgn0261632	FBgn0036380	FBgn0013987	FBgn0015039	4501	43	16906	15562
FBgn0016978	FBgn0263213	FBgn0014000	FBgn0015040	1307	9201	16922	15568
FBgn0032638	FBgn0035401	FBgn0014002	FBgn0015129	9857	744	16939	15896
FBgn0034345	FBgn0031011	FBgn0014010	FBgn0015222	8537	9912	16978	15898
FBgn0083972	FBgn0085403	FBgn0014019	FBgn0015229	2261	4886	16979	15900
FBgn0031630	FBgn0029697	FBgn0014026	FBgn0015247	10278	3208	16981	15901
FBgn0033202	FBgn0045476	FBgn0014029	FBgn0015268	2581	4862	16998	15902
FBgn0014141	FBgn0035981	FBgn0014031	FBgn0015278	2247	1602	17005	15903
FBgn0028936	FBgn0030927	FBgn0014032	FBgn0015288	3931	5502	17025	15904
FBgn0039387	FBgn0038435	FBgn0014033	FBgn0015323	6518	7360	17069	15930
FBgn0033609	FBgn0016694	FBgn0014075	FBgn0015360	80301	1428	17087	15932
FBgn0036534	FBgn0036547	FBgn0014092	FBgn0015391	240	10570	17089	15937
FBgn0035468	FBgn0031689	FBgn0014141	FBgn0015396	7075	10846	17117	15939
FBgn0016694	FBgn0022359	FBgn0014189	FBgn0015402	5803	6324	17118	15979
FBgn0022359	FBgn0036046	FBgn0014391	FBgn0015513	2669	862	17123	15983
FBgn0036046	FBgn0023479	FBgn0014427	FBgn0015522	7122	27165	17125	16002
FBgn0035331	FBgn0263032	FBgn0014454	FBgn0015541	960	23708	17159	16007
FBgn0004885	FBgn0038083	FBgn0014455	FBgn0015546	11234	5121	17160	16010
FBgn0037623	FBgn0052451	FBgn0014464	FBgn0015558	2289	9899	17161	16011
FBgn0036793	FBgn0025373	FBgn0014465	FBgn0015565	933	79734	17164	16012
FBgn0039094	FBgn0004885	FBgn0014469	FBgn0015567	1462	8534	17172	16154
FBgn0051221	FBgn0036165	FBgn0014859	FBgn0015568	6787	10125	17181	16157
FBgn0030773	FBgn0032049	FBgn0014861	FBgn0015576	8405	10439	17216	16170
FBgn0000964	FBgn0040308	FBgn0014863	FBgn0015577	1806	1730	17222	16185
FBgn0024289	FBgn0025866	FBgn0014868	FBgn0015609	9454	793	17248	16201
FBgn0052459	FBgn0032084	FBgn0014869	FBgn0015622	9738	211	17252	16205
FBgn0004045	FBgn0002036	FBgn0014903	FBgn0015623	2153	8997	17256	16211
FBgn0013812	FBgn0035904	FBgn0014931	FBgn0015663	7049	577	17260	16323
FBgn0034155	FBgn0039094	FBgn0015019	FBgn0015714	4495	11069	17263	16332
FBgn0030101	FBgn0250908	FBgn0015031	FBgn0015721	1102	8120	17268	16336
FBgn0035523	FBgn0030160	FBgn0015032	FBgn0015766	4118	9143	17281	16337
FBgn0013954	FBgn0031494	FBgn0015033	FBgn0015772	11326	509	17330	16348
FBgn0050197	FBgn0000964	FBgn0015035	FBgn0015777	5422	10178	17349	16362
FBgn0260972	FBgn0024289	FBgn0015040	FBgn0015797	5576	3785	17356	16364
FBgn0028490	FBgn0036964	FBgn0015075	FBgn0015799	1356	6456	17357	16402
FBgn0000317	FBgn0260223	FBgn0015221	FBgn0015801	10732	2157	17381	16403
FBgn0027375	FBgn0035439	FBgn0015222	FBgn0015803	3572	2161	17420	16408
FBgn0029727	FBgn0038702	FBgn0015239	FBgn0015806	8819	9369	17427	16413
FBgn0034382	FBgn0004045	FBgn0015245	FBgn0015919	10791	2913	17428	16414
FBgn0035338	FBgn0013954	FBgn0015282	FBgn0015929	4982	1620	17448	16426
FBgn0033792	FBgn0085285	FBgn0015283	FBgn0016031	8406	5122	17470	16434
FBgn0023531	FBgn0259225	FBgn0015321	FBgn0016047	8082	9256	17475	16438
FBgn0032078	FBgn0038984	FBgn0015324	FBgn0016059	2013	8912	17681	16439
FBgn0025800	FBgn0030797	FBgn0015351	FBgn0016070	2239	2562	17684	16440
FBgn0025697	FBgn0013279	FBgn0015376	FBgn0016076	3691	8941	17685	16449
FBgn0024728	FBgn0038631	FBgn0015379	FBgn0016078	1112	9659	17686	16450
FBgn0038181	FBgn0039593	FBgn0015393	FBgn0016123	1573	3706	17688	16452
FBgn0027550	FBgn0034733	FBgn0015519	FBgn0016131	6584	22871	17690	16453
FBgn0034364	FBgn0024945	FBgn0015521	FBgn0016650	8777	2902	17692	16468
FBgn0038881	FBgn0040609	FBgn0015522	FBgn0016672	1396	6508	17763	16477
FBgn0022708	FBgn0031770	FBgn0015542	FBgn0016693	1836	10669	17766	16485
FBgn0022984	FBgn0031808	FBgn0015568	FBgn0016694	4124	11122	17768	16492
FBgn0004656	FBgn0032416	FBgn0015569	FBgn0016756	51196	6258	17775	16493
FBgn0037433	FBgn0029704	FBgn0015570	FBgn0016794	2246	9365	17828	16497
FBgn0029831	FBgn0052944	FBgn0015571	FBgn0016917	5891	51412	17846	16500
FBgn0030761	FBgn0085209	FBgn0015572	FBgn0016926	9865	8745	17847	16506
FBgn0050384	FBgn0027550	FBgn0015575	FBgn0016930	6038	7884	17855	16508
FBgn0085417	FBgn0034364	FBgn0015576	FBgn0016975	8800	7644	17857	16512
FBgn0037105	FBgn0022708	FBgn0015591	FBgn0016976	4921	5801	17858	16514
FBgn0031256	FBgn0033936	FBgn0015600	FBgn0017549	7802	5868	17864	16518
FBgn0030151	FBgn0029831	FBgn0015622	FBgn0017558	10840	1960	17874	16520
FBgn0031975	FBgn0038194	FBgn0015714	FBgn0017561	6932	6775	17876	16521
FBgn0015766	FBgn0250755	FBgn0015737	FBgn0019661	3625	152	17913	16523
FBgn0039429	FBgn0037801	FBgn0015756	FBgn0019662	3764	9699	17921	16525
FBgn0036757	FBgn0259210	FBgn0015765	FBgn0019928	10268	116986	17932	16526
FBgn0028497	FBgn0020258	FBgn0015766	FBgn0019952	580	6861	17939	16529
FBgn0262570	FBgn0033387	FBgn0015773	FBgn0019985	8424	3598	17954	16536
FBgn0003984	FBgn0050428	FBgn0015778	FBgn0020245	1629	956	17955	16538
FBgn0034137	FBgn0085417	FBgn0015781	FBgn0020251	26137	10900	17957	16539
FBgn0085824	FBgn0040843	FBgn0015797	FBgn0020258	5348	9331	17961	16542
FBgn0022702	FBgn0032435	FBgn0015799	FBgn0020270	1605	3981	17974	16543
FBgn0259745	FBgn0031256	FBgn0015805	FBgn0020272	3014	1740	17977	16548
FBgn0029837	FBgn0030151	FBgn0015808	FBgn0020278	9848	4145	17978	16549
FBgn0051436	FBgn0032343	FBgn0015834	FBgn0020299	5154	5582	17984	16554
FBgn0004370	FBgn0036757	FBgn0015872	FBgn0020300	6261	1016	17996	16559
FBgn0039914	FBgn0032613	FBgn0015903	FBgn0020303	11104	6000	17997	16574
FBgn0004237	FBgn0000181	FBgn0015924	FBgn0020304	6876	6263	17999	16590
FBgn0023076	FBgn0040376	FBgn0015929	FBgn0020309	5125	53358	18002	16600
FBgn0026401	FBgn0021764	FBgn0016013	FBgn0020372	5305	9211	18004	16601
FBgn0032601	FBgn0051664	FBgn0016041	FBgn0020385	51375	2774	18007	16661
FBgn0034603	FBgn0050151	FBgn0016047	FBgn0020386	22834	10814	18015	16675
FBgn0034277	FBgn0039817	FBgn0016054	FBgn0020388	284	1850	18016	16764
FBgn0030628	FBgn0040060	FBgn0016070	FBgn0020414	51760	6326	18020	16772
FBgn0035371	FBgn0004863	FBgn0016119	FBgn0020416	6637	9908	18025	16774
FBgn0001296	FBgn0036298	FBgn0016120	FBgn0020429	5080	10368	18038	16779
FBgn0042086	FBgn0039219	FBgn0016122	FBgn0020439	5224	2254	18044	16780
FBgn0030961	FBgn0259481	FBgn0016672	FBgn0020445	1837	26045	18081	16797
FBgn0261930	FBgn0030562	FBgn0016675	FBgn0020493	2949	8853	18082	16800
FBgn0032803	FBgn0030108	FBgn0016685	FBgn0020503	22849	50859	18088	16816
FBgn0033129	FBgn0033774	FBgn0016687	FBgn0020508	6094	2583	18089	16819
FBgn0014454	FBgn0015625	FBgn0016691	FBgn0020521	3696	5153	18094	16825
FBgn0031261	FBgn0035482	FBgn0016696	FBgn0020545	7289	22891	18101	16832
FBgn0261241	FBgn0035260	FBgn0016697	FBgn0020621	6563	2558	18102	16835
FBgn0250835	FBgn0032601	FBgn0016715	FBgn0020637	3977	4916	18103	16847
FBgn0039109	FBgn0015298	FBgn0016726	FBgn0020642	7704	5128	18120	16855
FBgn0000038	FBgn0039713	FBgn0016797	FBgn0020756	3782	9079	18121	16867
FBgn0033677	FBgn0030628	FBgn0016917	FBgn0020764	5346	3642	18146	16882
FBgn0027616	FBgn0051051	FBgn0017456	FBgn0020906	4487	8787	18155	16904
FBgn0260775	FBgn0051769	FBgn0017482	FBgn0020907	5365	8193	18166	16909
FBgn0039402	FBgn0037592	FBgn0017558	FBgn0020908	4504	2903	18168	16949
FBgn0038100	FBgn0001296	FBgn0017561	FBgn0020910	23405	6595	18190	16969
FBgn0032219	FBgn0042086	FBgn0017579	FBgn0020912	1842	6863	18207	16973
FBgn0034709	FBgn0038912	FBgn0019624	FBgn0021760	9705	1813	18209	16974
FBgn0032139	FBgn0031261	FBgn0019643	FBgn0021761	9355	6496	18377	16993
FBgn0037808	FBgn0053513	FBgn0019644	FBgn0021800	23264	9522	18389	17001
FBgn0051548	FBgn0040234	FBgn0019830	FBgn0021814	140	2554	18390	17022
FBgn0029723	FBgn0031021	FBgn0019925	FBgn0021953	2840	40	18400	17064
FBgn0038732	FBgn0001149	FBgn0019929	FBgn0022029	9244	7504	18412	17067
FBgn0033342	FBgn0031302	FBgn0019932	FBgn0022153	3428	9142	18424	17101
FBgn0086906	FBgn0000536	FBgn0019936	FBgn0022160	57447	2892	18430	17112
FBgn0051864	FBgn0039239	FBgn0019940	FBgn0022359	4496	22866	18431	17119
FBgn0085693	FBgn0043005	FBgn0019948	FBgn0022700	23205	22865	18438	17121
FBgn0005427	FBgn0021738	FBgn0019952	FBgn0022702	4051	4062	18439	17127
FBgn0004133	FBgn0261362	FBgn0019960	FBgn0022710	11039	2572	18441	17128
FBgn0085447	FBgn0034538	FBgn0019982	FBgn0022800	9448	5173	18472	17131
FBgn0029176	FBgn0031935	FBgn0020235	FBgn0022959	23643	9162	18475	17132
FBgn0032726	FBgn0029714	FBgn0020236	FBgn0023076	10647	98	18476	17133
FBgn0038191	FBgn0004629	FBgn0020238	FBgn0023083	114	2566	18478	17134
FBgn0044048	FBgn0034709	FBgn0020240	FBgn0023095	26206	2281	18479	17153
FBgn0036043	FBgn0038419	FBgn0020255	FBgn0023129	5375	9748	18481	17156
FBgn0262531	FBgn0031518	FBgn0020269	FBgn0023178	116228	6511	18484	17158
FBgn0032358	FBgn0010905	FBgn0020272	FBgn0023179	6299	398	18508	17171
FBgn0032010	FBgn0051548	FBgn0020277	FBgn0023181	28513	2788	18519	17175
FBgn0014465	FBgn0004368	FBgn0020278	FBgn0023197	23620	7087	18526	17190
FBgn0026262	FBgn0043792	FBgn0020294	FBgn0023214	4821	5100	18530	17191
FBgn0037387	FBgn0011761	FBgn0020300	FBgn0023407	9023	23266	18536	17192
FBgn0053532	FBgn0032609	FBgn0020367	FBgn0023441	9169	10808	18541	17193
FBgn0026777	FBgn0026438	FBgn0020369	FBgn0023479	1466	6014	18548	17196
FBgn0037636	FBgn0035195	FBgn0020381	FBgn0023489	5995	2555	18557	17201
FBgn0041789	FBgn0263076	FBgn0020385	FBgn0023511	5454	492	18569	17207
FBgn0262972	FBgn0053087	FBgn0020389	FBgn0023512	5027	6334	18576	17237
FBgn0037637	FBgn0053548	FBgn0020392	FBgn0023513	2186	6546	18597	17242
FBgn0043854	FBgn0034720	FBgn0020414	FBgn0023516	10318	3617	18604	17245
FBgn0011591	FBgn0263220	FBgn0020415	FBgn0023525	5858	5297	18605	17250
FBgn0034791	FBgn0063924	FBgn0020443	FBgn0023530	6660	4974	18611	17279
FBgn0035557	FBgn0083950	FBgn0020497	FBgn0023531	23499	3751	18624	17304
FBgn0052667	FBgn0035593	FBgn0020513	FBgn0023534	9736	5597	18632	17305
FBgn0001230	FBgn0003742	FBgn0020521	FBgn0023535	7730	1010	18641	17308
FBgn0036542	FBgn0063493	FBgn0020618	FBgn0023536	831	11146	18645	17313
FBgn0003328	FBgn0032726	FBgn0020633	FBgn0023537	8544	10472	18647	17344
FBgn0032377	FBgn0044048	FBgn0020637	FBgn0023540	358	25875	18648	17345
FBgn0086129	FBgn0032287	FBgn0020642	FBgn0023545	5033	2262	18654	17347
FBgn0037686	FBgn0030688	FBgn0020653	FBgn0024179	11170	2915	18669	17354
FBgn0038207	FBgn0036043	FBgn0020655	FBgn0024184	94134	5127	18670	17389
FBgn0000473	FBgn0262729	FBgn0020762	FBgn0024227	7132	3739	18676	17423
FBgn0032773	FBgn0012037	FBgn0020906	FBgn0024236	3842	1038	18685	17433
FBgn0259173	FBgn0037387	FBgn0020908	FBgn0024238	4336	2911	18704	17444
FBgn0016675	FBgn0026777	FBgn0020910	FBgn0024248	5992	3358	18705	17454
FBgn0036825	FBgn0052368	FBgn0021764	FBgn0024290	3547	4889	18707	17528
FBgn0038290	FBgn0015576	FBgn0021765	FBgn0024293	9612	5646	18715	17532
FBgn0036262	FBgn0051075	FBgn0021768	FBgn0024314	25840	4212	18719	17533
FBgn0037744	FBgn0040922	FBgn0021795	FBgn0024315	3516	2257	18739	17534
FBgn0033159	FBgn0043854	FBgn0021814	FBgn0024329	55805	518	18744	17535
FBgn0038715	FBgn0035557	FBgn0021825	FBgn0024361	5627	4986	18749	17536
FBgn0010411	FBgn0052667	FBgn0021895	FBgn0024365	3399	8525	18761	17687
FBgn0259109	FBgn0001230	FBgn0021979	FBgn0024491	57326	6262	18767	17691
FBgn0028373	FBgn0031450	FBgn0022023	FBgn0024555	22794	10632	18777	17748
FBgn0052251	FBgn0003328	FBgn0022027	FBgn0024734	9940	3360	18783	17764
FBgn0034025	FBgn0003656	FBgn0022213	FBgn0024807	2734	610	18786	17777
FBgn0014859	FBgn0036024	FBgn0022268	FBgn0024889	10735	8867	18813	17827
FBgn0038143	FBgn0263258	FBgn0022288	FBgn0024891	8555	2290	18826	17829
FBgn0260432	FBgn0023496	FBgn0022343	FBgn0024912	81552	785	18844	17831
FBgn0050050	FBgn0037818	FBgn0022349	FBgn0024941	81578	1961	18846	17859
FBgn0051453	FBgn0030469	FBgn0022355	FBgn0024943	81628	56341	18969	17865
FBgn0003567	FBgn0034965	FBgn0022359	FBgn0024947	3123	783	18973	17868
FBgn0263097	FBgn0037686	FBgn0022699	FBgn0024958	829	1804	18996	17872
FBgn0035656	FBgn0036697	FBgn0022708	FBgn0024963	8763	9495	19012	17873
FBgn0032864	FBgn0039308	FBgn0022709	FBgn0024980	1500	6620	19018	17880
FBgn0029648	FBgn0032773	FBgn0022772	FBgn0024985	3665	5579	19044	17909
FBgn0058198	FBgn0034614	FBgn0022774	FBgn0024986	23524	753	19057	17910
FBgn0086355	FBgn0259682	FBgn0022893	FBgn0024987	8073	11332	19060	17912
FBgn0033879	FBgn0035170	FBgn0023000	FBgn0024992	7430	10605	19063	17918
FBgn0039927	FBgn0037324	FBgn0023076	FBgn0024995	2222	863	19075	17919
FBgn0031110	FBgn0036825	FBgn0023094	FBgn0025390	10801	51046	19076	17922
FBgn0035505	FBgn0038290	FBgn0023129	FBgn0025454	9601	81553	19084	17933
FBgn0035589	FBgn0036262	FBgn0023143	FBgn0025549	1192	81565	19085	17937
FBgn0263218	FBgn0031002	FBgn0023169	FBgn0025574	6767	5662	19087	17940
FBgn0051776	FBgn0037744	FBgn0023170	FBgn0025583	5052	4121	19090	17965
FBgn0024294	FBgn0029930	FBgn0023171	FBgn0025595	824	5800	19116	17970
FBgn0002868	FBgn0004872	FBgn0023174	FBgn0025621	9124	10235	19122	17975
FBgn0039525	FBgn0030504	FBgn0023175	FBgn0025624	7037	7881	19130	17993
FBgn0038849	FBgn0085382	FBgn0023178	FBgn0025625	3106	23770	19139	18003
FBgn0003659	FBgn0262035	FBgn0023197	FBgn0025626	10284	2821	19156	18005
FBgn0052066	FBgn0010411	FBgn0023212	FBgn0025628	716	9478	19157	18008
FBgn0014863	FBgn0004435	FBgn0023441	FBgn0025630	7514	5453	19158	18011
FBgn0026428	FBgn0003462	FBgn0023477	FBgn0025631	11167	5594	19165	18019
FBgn0037012	FBgn0028373	FBgn0023479	FBgn0025633	4179	3761	19171	18023
FBgn0051324	FBgn0000239	FBgn0023489	FBgn0025640	60481	26115	19173	18029
FBgn0261990	FBgn0031907	FBgn0023507	FBgn0025641	284119	2563	19182	18073
FBgn0002948	FBgn0058160	FBgn0023514	FBgn0025643	1191	2557	19183	18074
FBgn0030640	FBgn0020277	FBgn0023516	FBgn0025676	4176	87	19185	18080
FBgn0033169	FBgn0034025	FBgn0023529	FBgn0025682	3148	5515	19186	18087
FBgn0034877	FBgn0261871	FBgn0023530	FBgn0025683	81688	23741	19188	18108
FBgn0037814	FBgn0250815	FBgn0023534	FBgn0025692	3107	57515	19210	18111
FBgn0014903	FBgn0039625	FBgn0023537	FBgn0025697	304	6428	19212	18115
FBgn0039531	FBgn0262473	FBgn0023550	FBgn0025709	4218	529	19224	18117
FBgn0004618	FBgn0016726	FBgn0024234	FBgn0025726	5747	10109	19230	18124
FBgn0085427	FBgn0029999	FBgn0024238	FBgn0025740	23344	8237	19240	18125
FBgn0052726	FBgn0039420	FBgn0024244	FBgn0025777	5062	5862	19245	18128
FBgn0013771	FBgn0031490	FBgn0024245	FBgn0025807	23654	10094	19262	18129
FBgn0024804	FBgn0032068	FBgn0024250	FBgn0025825	3122	7529	19277	18131
FBgn0038866	FBgn0035656	FBgn0024251	FBgn0025832	3397	375	19279	18143
FBgn0032482	FBgn0003275	FBgn0024285	FBgn0025833	22929	7341	19286	18163
FBgn0262636	FBgn0032864	FBgn0024289	FBgn0025866	7095	116138	19298	18174
FBgn0029933	FBgn0039530	FBgn0024352	FBgn0025878	3958	11222	19303	18175
FBgn0040285	FBgn0058198	FBgn0024432	FBgn0025879	501	23015	19305	18191
FBgn0030593	FBgn0086355	FBgn0024509	FBgn0026015	1316	1107	19324	18193
FBgn0037918	FBgn0033879	FBgn0024558	FBgn0026061	3992	2805	19330	18196
FBgn0023178	FBgn0033555	FBgn0024732	FBgn0026077	5175	25814	19334	18201
FBgn0040637	FBgn0023094	FBgn0024733	FBgn0026085	6938	7419	19335	18212
FBgn0014011	FBgn0043575	FBgn0024740	FBgn0026086	3189	7070	19337	18213
FBgn0031520	FBgn0015240	FBgn0024754	FBgn0026176	6774	8428	19339	18217
FBgn0024811	FBgn0011227	FBgn0024841	FBgn0026189	9360	23710	19342	18218
FBgn0038180	FBgn0038402	FBgn0024897	FBgn0026197	23176	7905	19346	18222
FBgn0051869	FBgn0036732	FBgn0024912	FBgn0026199	10049	1848	19348	18223
FBgn0028420	FBgn0039525	FBgn0024913	FBgn0026206	10492	51382	19352	18226
FBgn0015278	FBgn0027335	FBgn0024920	FBgn0026238	5696	54205	19357	18230
FBgn0050488	FBgn0031942	FBgn0024943	FBgn0026239	5900	26580	19359	18263
FBgn0250830	FBgn0032915	FBgn0024945	FBgn0026309	23576	7386	19360	18286
FBgn0013811	FBgn0052066	FBgn0024957	FBgn0026314	1490	3964	19362	18301
FBgn0015772	FBgn0026428	FBgn0024983	FBgn0026370	26959	57035	19373	18302
FBgn0261596	FBgn0030640	FBgn0024986	FBgn0026375	7105	65018	19376	18386
FBgn0066101	FBgn0014903	FBgn0024989	FBgn0026376	7026	4191	19387	18387
FBgn0036759	FBgn0016687	FBgn0025117	FBgn0026379	7205	7381	19401	18414
FBgn0033039	FBgn0052237	FBgn0025140	FBgn0026428	8773	8490	19414	18417
FBgn0014019	FBgn0032482	FBgn0025286	FBgn0026438	444	23479	19415	18440
FBgn0038948	FBgn0040007	FBgn0025352	FBgn0026439	30851	10539	19650	18451
FBgn0039789	FBgn0262636	FBgn0025366	FBgn0026576	22978	1738	19651	18453
FBgn0053547	FBgn0040071	FBgn0025373	FBgn0026592	1292	7326	19684	18458
FBgn0035131	FBgn0040285	FBgn0025454	FBgn0026593	8644	10294	19691	18483
FBgn0037715	FBgn0011722	FBgn0025456	FBgn0026602	2824	65009	19698	18515
FBgn0025700	FBgn0026361	FBgn0025458	FBgn0026619	11067	1534	19707	18518
FBgn0259710	FBgn0023178	FBgn0025463	FBgn0026666	8660	488	19718	18537
FBgn0015801	FBgn0003274	FBgn0025469	FBgn0026679	84617	688	19727	18546
FBgn0030332	FBgn0031250	FBgn0025582	FBgn0026702	5292	7991	19752	18549
FBgn0031637	FBgn0036764	FBgn0025583	FBgn0026713	1069	5178	19762	18554
FBgn0033160	FBgn0053303	FBgn0025592	FBgn0026721	10979	27069	19773	18563
FBgn0031413	FBgn0002021	FBgn0025595	FBgn0026722	26471	81689	19820	18570
FBgn0038293	FBgn0261955	FBgn0025615	FBgn0026737	10749	490	19821	18574
FBgn0031926	FBgn0011824	FBgn0025620	FBgn0026872	4664	25977	19826	18575
FBgn0037025	FBgn0035409	FBgn0025628	FBgn0026876	1410	4724	19876	18577
FBgn0033607	FBgn0026374	FBgn0025637	FBgn0027070	23272	109	19877	18578
FBgn0085732	FBgn0261596	FBgn0025638	FBgn0027073	4781	8408	19889	18584
FBgn0036663	FBgn0036101	FBgn0025643	FBgn0027079	3400	10057	19894	18596
FBgn0250819	FBgn0003326	FBgn0025678	FBgn0027083	6453	10522	19899	18600
FBgn0030808	FBgn0036759	FBgn0025680	FBgn0027084	23075	2887	20019	18607
FBgn0039131	FBgn0038948	FBgn0025682	FBgn0027086	563	4436	20020	18610
FBgn0262717	FBgn0023489	FBgn0025683	FBgn0027090	4149	23221	20133	18613
FBgn0034506	FBgn0039789	FBgn0025687	FBgn0027108	3551	5910	20163	18619
FBgn0031442	FBgn0026252	FBgn0025693	FBgn0027109	80303	6548	20168	18626
FBgn0002774	FBgn0015714	FBgn0025700	FBgn0027111	4094	23291	20170	18627
FBgn0004554	FBgn0038358	FBgn0025712	FBgn0027296	8613	10658	20185	18628
FBgn0085359	FBgn0027529	FBgn0025724	FBgn0027335	30008	23037	20203	18636
FBgn0039759	FBgn0031538	FBgn0025725	FBgn0027339	57060	1039	20230	18637
FBgn0038565	FBgn0025608	FBgn0025814	FBgn0027341	306	6119	20257	18640
FBgn0027866	FBgn0030030	FBgn0025815	FBgn0027356	1116	50810	20262	18667
FBgn0033286	FBgn0037834	FBgn0025827	FBgn0027363	3006	784	20271	18671
FBgn0027280	FBgn0033484	FBgn0025865	FBgn0027453	3430	2135	20274	18675
FBgn0031092	FBgn0037715	FBgn0025879	FBgn0027492	5471	4692	20276	18679
FBgn0010113	FBgn0025700	FBgn0025885	FBgn0027493	5104	23154	20311	18682
FBgn0052767	FBgn0000173	FBgn0026056	FBgn0027506	81542	27065	20316	18709
FBgn0030858	FBgn0031403	FBgn0026061	FBgn0027513	25936	4345	20322	18717
FBgn0039909	FBgn0024558	FBgn0026079	FBgn0027518	114876	10687	20334	18720
FBgn0000024	FBgn0053517	FBgn0026084	FBgn0027527	11030	28755	20354	18750
FBgn0052220	FBgn0032494	FBgn0026150	FBgn0027528	5919	5805	20355	18751
FBgn0033524	FBgn0030332	FBgn0026176	FBgn0027532	58473	79068	20356	18752
FBgn0041205	FBgn0030157	FBgn0026179	FBgn0027535	7025	770	20360	18754
FBgn0034879	FBgn0038293	FBgn0026190	FBgn0027544	84263	23057	20394	18755
FBgn0040837	FBgn0040968	FBgn0026192	FBgn0027552	8612	23240	20404	18759
FBgn0037288	FBgn0026566	FBgn0026196	FBgn0027556	9459	1628	20409	18760
FBgn0040281	FBgn0037025	FBgn0026197	FBgn0027558	948	10391	20416	18762
FBgn0050410	FBgn0034143	FBgn0026250	FBgn0027560	9026	2890	20429	18763
FBgn0052082	FBgn0000566	FBgn0026268	FBgn0027561	11145	10330	20430	18769
FBgn0040236	FBgn0039131	FBgn0026315	FBgn0027562	655	22927	20460	18771
FBgn0250847	FBgn0037760	FBgn0026323	FBgn0027563	51	7436	20464	18779
FBgn0034487	FBgn0262717	FBgn0026371	FBgn0027565	7263	26052	20473	18789
FBgn0036619	FBgn0043578	FBgn0026380	FBgn0027569	1501	54674	20492	18791
FBgn0027585	FBgn0038046	FBgn0026388	FBgn0027570	972	23608	20495	18793
FBgn0262539	FBgn0262728	FBgn0026403	FBgn0027571	55916	9353	20496	18795
FBgn0040491	FBgn0034636	FBgn0026409	FBgn0027575	7041	9378	20509	18797
FBgn0005648	FBgn0035541	FBgn0026415	FBgn0027578	83604	816	20513	18806
FBgn0037110	FBgn0035382	FBgn0026418	FBgn0027579	1070	9379	20520	18807
FBgn0029911	FBgn0035592	FBgn0026428	FBgn0027580	3679	9568	20527	18810
FBgn0038981	FBgn0032265	FBgn0026432	FBgn0027585	26135	4133	20535	18817
FBgn0051030	FBgn0003429	FBgn0026438	FBgn0027586	11100	23040	20541	18823
FBgn0030193	FBgn0032988	FBgn0026533	FBgn0027590	54453	57468	20562	18845
FBgn0037659	FBgn0035481	FBgn0026562	FBgn0027594	6285	23237	20563	18854
FBgn0034611	FBgn0023441	FBgn0026563	FBgn0027597	6387	776	20585	18857
FBgn0003655	FBgn0085359	FBgn0026565	FBgn0027598	23245	1944	20589	18858
FBgn0262029	FBgn0011581	FBgn0026566	FBgn0027601	1646	8601	20597	18951
FBgn0032282	FBgn0039759	FBgn0026570	FBgn0027607	26002	10476	20603	18970
FBgn0053503	FBgn0003731	FBgn0026576	FBgn0027608	7813	9717	20605	18976
FBgn0033980	FBgn0034310	FBgn0026585	FBgn0027611	9975	1325	20607	18983
FBgn0010435	FBgn0028342	FBgn0026593	FBgn0027655	1632	9228	20615	18984
FBgn0261341	FBgn0034089	FBgn0026630	FBgn0027780	3431	1032	20616	18987
FBgn0037341	FBgn0031092	FBgn0026718	FBgn0027788	2920	6854	20637	18991
FBgn0038716	FBgn0040531	FBgn0026749	FBgn0027793	11240	3776	20638	18993
FBgn0040382	FBgn0000527	FBgn0026751	FBgn0027794	5727	3754	20649	19009
FBgn0261989	FBgn0030858	FBgn0026754	FBgn0027795	9469	5099	20656	19041
FBgn0261363	FBgn0039909	FBgn0026755	FBgn0027836	6663	7531	20658	19045
FBgn0046113	FBgn0040390	FBgn0026878	FBgn0027844	11118	47	20662	19046
FBgn0016696	FBgn0037167	FBgn0026879	FBgn0027914	23127	53335	20663	19047
FBgn0017590	FBgn0035583	FBgn0027074	FBgn0027929	50618	814	20666	19049
FBgn0035817	FBgn0030608	FBgn0027080	FBgn0027930	23657	6327	20675	19055
FBgn0051146	FBgn0041205	FBgn0027093	FBgn0027932	9184	2002	20677	19058
FBgn0050359	FBgn0261270	FBgn0027095	FBgn0028331	429	6323	20713	19069
FBgn0027603	FBgn0034879	FBgn0027108	FBgn0028343	5208	6328	20716	19099
FBgn0031959	FBgn0037288	FBgn0027329	FBgn0028360	9576	2172	20733	19108
FBgn0030412	FBgn0050410	FBgn0027339	FBgn0028371	10411	5026	20745	19125
FBgn0023211	FBgn0034296	FBgn0027341	FBgn0028373	361	3624	20751	19126
FBgn0025634	FBgn0014031	FBgn0027343	FBgn0028374	3486	9590	20776	19144
FBgn0032518	FBgn0085391	FBgn0027348	FBgn0028380	2534	1006	20779	19153
FBgn0040260	FBgn0052675	FBgn0027360	FBgn0028381	6674	9747	20787	19164
FBgn0085429	FBgn0037758	FBgn0027496	FBgn0028394	4155	27077	20817	19179
FBgn0019985	FBgn0025807	FBgn0027500	FBgn0028420	7100	3382	20818	19193
FBgn0011570	FBgn0032167	FBgn0027506	FBgn0028422	7536	27445	20822	19201
FBgn0031012	FBgn0085370	FBgn0027547	FBgn0028424	54498	22996	20832	19206
FBgn0052432	FBgn0039265	FBgn0027550	FBgn0028425	6738	10653	20843	19207
FBgn0051108	FBgn0035914	FBgn0027552	FBgn0028426	166647	57144	20844	19223
FBgn0036980	FBgn0038343	FBgn0027554	FBgn0028431	8871	10395	20846	19227
FBgn0035427	FBgn0051510	FBgn0027560	FBgn0028473	2852	773	20851	19229
FBgn0033266	FBgn0034267	FBgn0027562	FBgn0028476	5414	10645	20852	19231
FBgn0037141	FBgn0262539	FBgn0027570	FBgn0028480	10362	55384	20873	19242
FBgn0033730	FBgn0085483	FBgn0027571	FBgn0028481	10241	57142	20901	19244
FBgn0052801	FBgn0263255	FBgn0027572	FBgn0028482	825	406	20910	19247
FBgn0032204	FBgn0259172	FBgn0027578	FBgn0028484	8611	5213	20911	19248
FBgn0052755	FBgn0004584	FBgn0027579	FBgn0028487	8908	3745	20913	19250
FBgn0037009	FBgn0030057	FBgn0027580	FBgn0028490	10778	283450	20930	19252
FBgn0260441	FBgn0033403	FBgn0027583	FBgn0028491	7461	10962	20937	19259
FBgn0039529	FBgn0032282	FBgn0027584	FBgn0028494	4772	1209	20964	19263
FBgn0003117	FBgn0038755	FBgn0027586	FBgn0028500	10083	6319	20965	19317
FBgn0036213	FBgn0038043	FBgn0027588	FBgn0028509	8573	140597	20973	19326
FBgn0045500	FBgn0033354	FBgn0027589	FBgn0028516	8837	5142	20975	19340
FBgn0038704	FBgn0053503	FBgn0027590	FBgn0028518	5265	27229	20977	19345
FBgn0033130	FBgn0037087	FBgn0027600	FBgn0028532	645745	8706	21367	19365
FBgn0036317	FBgn0015396	FBgn0027605	FBgn0028533	5269	901	21371	19377
FBgn0016794	FBgn0031693	FBgn0027610	FBgn0028534	3135	84525	21400	19383
FBgn0036093	FBgn0010435	FBgn0027611	FBgn0028539	2260	10128	21406	19386
FBgn0051410	FBgn0020270	FBgn0027615	FBgn0028540	3306	1353	21410	19395
FBgn0038570	FBgn0052743	FBgn0027619	FBgn0028542	8572	23136	21422	19400
FBgn0034142	FBgn0010039	FBgn0027620	FBgn0028543	26018	10152	21453	19411
FBgn0053143	FBgn0034322	FBgn0027621	FBgn0028550	3119	2047	21463	19418
FBgn0032162	FBgn0026415	FBgn0027655	FBgn0028573	29969	10730	21665	19419
FBgn0034509	FBgn0029706	FBgn0027657	FBgn0028577	2327	23236	21672	19649
FBgn0032899	FBgn0261363	FBgn0027785	FBgn0028622	6342	130074	21745	19662
FBgn0259834	FBgn0019940	FBgn0027786	FBgn0028644	220988	7416	21750	19671
FBgn0003975	FBgn0030148	FBgn0027790	FBgn0028645	3688	8565	21752	19672
FBgn0014163	FBgn0039075	FBgn0027835	FBgn0028647	3488	10079	21761	19674
FBgn0034475	FBgn0052068	FBgn0027930	FBgn0028664	677	293	21766	19679
FBgn0040992	FBgn0017590	FBgn0027945	FBgn0028670	1284	23089	21778	19697
FBgn0003514	FBgn0015524	FBgn0028325	FBgn0028699	114908	23543	21787	19699
FBgn0261564	FBgn0033465	FBgn0028327	FBgn0028700	79026	4976	21804	19704
FBgn0038740	FBgn0033835	FBgn0028336	FBgn0028704	3113	9581	21808	19716
FBgn0027932	FBgn0041243	FBgn0028342	FBgn0028743	65125	2194	21821	19719
FBgn0039722	FBgn0037757	FBgn0028360	FBgn0028855	7837	7277	21825	19724
FBgn0016075	FBgn0038038	FBgn0028373	FBgn0028879	5411	10213	21826	19725
FBgn0032753	FBgn0263200	FBgn0028396	FBgn0028886	23350	23122	21838	19730
FBgn0033961	FBgn0050000	FBgn0028398	FBgn0028894	715	375056	21841	19735
FBgn0031791	FBgn0038897	FBgn0028399	FBgn0028904	9289	9905	21858	19736
FBgn0031802	FBgn0031453	FBgn0028401	FBgn0028916	4637	2036	21873	19737
FBgn0053139	FBgn0037727	FBgn0028411	FBgn0028920	57509	25999	21934	19739
FBgn0260746	FBgn0033458	FBgn0028418	FBgn0028939	857	271	21941	19775
FBgn0000489	FBgn0031401	FBgn0028420	FBgn0028940	57178	4628	21942	19823
FBgn0028427	FBgn0050359	FBgn0028425	FBgn0028954	26065	23392	21951	19896
FBgn0001624	FBgn0035092	FBgn0028430	FBgn0028955	23187	253782	21956	19921
FBgn0050020	FBgn0032518	FBgn0028433	FBgn0028962	493	23327	21974	19944
FBgn0028371	FBgn0032261	FBgn0028468	FBgn0028963	25777	26128	21975	20112
FBgn0030309	FBgn0035157	FBgn0028473	FBgn0028978	204	9645	21982	20130
FBgn0001259	FBgn0261393	FBgn0028479	FBgn0028983	25957	23080	21983	20148
FBgn0004577	FBgn0010501	FBgn0028480	FBgn0028985	4502	84890	22019	20166
FBgn0037670	FBgn0032350	FBgn0028507	FBgn0028990	115207	64112	22032	20182
FBgn0034897	FBgn0015039	FBgn0028515	FBgn0028996	25963	439921	22045	20183
FBgn0039994	FBgn0038313	FBgn0028519	FBgn0029003	10410	23171	22064	20187
FBgn0027080	FBgn0261840	FBgn0028523	FBgn0029079	23389	9326	22066	20190
FBgn0028515	FBgn0260441	FBgn0028526	FBgn0029091	216	10486	22067	20191
FBgn0034126	FBgn0034070	FBgn0028527	FBgn0029092	171023	5575	22083	20192
FBgn0042083	FBgn0033439	FBgn0028537	FBgn0029093	23129	1737	22088	20194
FBgn0014870	FBgn0001089	FBgn0028540	FBgn0029114	5295	114882	22095	20197
FBgn0034718	FBgn0024733	FBgn0028541	FBgn0029123	55568	10000	22097	20202
FBgn0261628	FBgn0036213	FBgn0028544	FBgn0029128	9444	1123	22138	20238
FBgn0031483	FBgn0051363	FBgn0028572	FBgn0029155	1992	11059	22142	20250
FBgn0053155	FBgn0039929	FBgn0028582	FBgn0029170	23048	201562	22143	20269
FBgn0032614	FBgn0035111	FBgn0028583	FBgn0029172	204851	3097	22151	20278
FBgn0001215	FBgn0032782	FBgn0028622	FBgn0029176	55970	10382	22153	20284
FBgn0030520	FBgn0003863	FBgn0028646	FBgn0029502	6541	5291	22154	20286
FBgn0261841	FBgn0259231	FBgn0028648	FBgn0029504	8879	23259	22156	20300
FBgn0039930	FBgn0051200	FBgn0028664	FBgn0029506	22998	192683	22166	20301
FBgn0035982	FBgn0004573	FBgn0028671	FBgn0029507	5934	157922	22193	20312
FBgn0036365	FBgn0033302	FBgn0028684	FBgn0029508	2799	1741	22194	20315
FBgn0036428	FBgn0039273	FBgn0028685	FBgn0029525	64764	89927	22195	20318
FBgn0004878	FBgn0034142	FBgn0028686	FBgn0029608	23213	26051	22200	20320
FBgn0002778	FBgn0053143	FBgn0028687	FBgn0029639	23036	127703	22201	20324
FBgn0025111	FBgn0032162	FBgn0028688	FBgn0029664	5962	57037	22215	20357
FBgn0050273	FBgn0023512	FBgn0028689	FBgn0029676	9686	11113	22222	20361
FBgn0015321	FBgn0030954	FBgn0028691	FBgn0029685	23091	23312	22223	20370
FBgn0037718	FBgn0036890	FBgn0028692	FBgn0029697	26092	91137	22235	20401
FBgn0029766	FBgn0005533	FBgn0028693	FBgn0029723	10611	3831	22240	20402
FBgn0036398	FBgn0039816	FBgn0028694	FBgn0029736	1997	23335	22241	20408
FBgn0032006	FBgn0039705	FBgn0028697	FBgn0029761	219654	23270	22248	20411
FBgn0029769	FBgn0030733	FBgn0028703	FBgn0029762	55544	23125	22249	20422
FBgn0036341	FBgn0013269	FBgn0028708	FBgn0029764	9728	23158	22259	20444
FBgn0001321	FBgn0030081	FBgn0028737	FBgn0029766	91746	79158	22268	20446
FBgn0259224	FBgn0036354	FBgn0028744	FBgn0029768	8801	23507	22276	20450
FBgn0034660	FBgn0032329	FBgn0028746	FBgn0029769	171546	3265	22278	20451
FBgn0262656	FBgn0086901	FBgn0028864	FBgn0029771	23522	4591	22284	20454
FBgn0029870	FBgn0039722	FBgn0028887	FBgn0029789	966	9479	22323	20459
FBgn0033777	FBgn0262559	FBgn0028896	FBgn0029791	9043	7402	22327	20466
FBgn0041711	FBgn0051036	FBgn0028899	FBgn0029799	25836	5362	22335	20479
FBgn0062565	FBgn0033961	FBgn0028936	FBgn0029800	23527	23031	22340	20481
FBgn0086779	FBgn0003187	FBgn0028939	FBgn0029801	29072	254531	22344	20482
FBgn0032400	FBgn0024250	FBgn0028955	FBgn0029804	23371	23373	22351	20493
FBgn0029948	FBgn0038803	FBgn0028956	FBgn0029810	140609	10396	22365	20502
FBgn0260003	FBgn0042106	FBgn0028961	FBgn0029813	23348	815	22368	20505
FBgn0036584	FBgn0053139	FBgn0028968	FBgn0029821	285527	23074	22375	20510
FBgn0051451	FBgn0003189	FBgn0028969	FBgn0029837	23513	85453	22381	20511
FBgn0011571	FBgn0260746	FBgn0028970	FBgn0029839	26036	7074	22388	20512
FBgn0034258	FBgn0030839	FBgn0028978	FBgn0029846	23258	144699	22404	20514
FBgn0037213	FBgn0030067	FBgn0028983	FBgn0029851	5788	23508	22415	20515
FBgn0029508	FBgn0015808	FBgn0028984	FBgn0029863	10042	201229	22427	20516
FBgn0063449	FBgn0030309	FBgn0028988	FBgn0029891	5586	460	22431	20519
FBgn0259216	FBgn0035639	FBgn0028999	FBgn0029896	93487	91	22589	20544
FBgn0033710	FBgn0014032	FBgn0029002	FBgn0029906	23180	6855	22596	20564
FBgn0033855	FBgn0053126	FBgn0029003	FBgn0029924	6237	10302	22627	20588
FBgn0033448	FBgn0038921	FBgn0029092	FBgn0029932	9886	23252	22628	20609
FBgn0031327	FBgn0051233	FBgn0029093	FBgn0029933	25976	57613	22630	20617
FBgn0035518	FBgn0040827	FBgn0029118	FBgn0029935	818	283638	22634	20620
FBgn0033051	FBgn0035756	FBgn0029134	FBgn0029950	26472	107	22637	20621
FBgn0045499	FBgn0050419	FBgn0029147	FBgn0029955	55818	9881	22646	20624
FBgn0037240	FBgn0039084	FBgn0029167	FBgn0029957	151011	26278	22654	20650
FBgn0020367	FBgn0016917	FBgn0029173	FBgn0029976	10156	23261	22670	20660
FBgn0034585	FBgn0042083	FBgn0029174	FBgn0029996	57553	23108	22680	20661
FBgn0030830	FBgn0034718	FBgn0029176	FBgn0030001	10914	1540	22689	20687
FBgn0005558	FBgn0050105	FBgn0029503	FBgn0030011	23239	23116	22693	20720
FBgn0036417	FBgn0004432	FBgn0029507	FBgn0030029	140890	22941	22700	20732
FBgn0032897	FBgn0026192	FBgn0029521	FBgn0030040	23210	23228	22701	20753
FBgn0037788	FBgn0038795	FBgn0029523	FBgn0030041	23336	57608	22710	20788
FBgn0001297	FBgn0032614	FBgn0029608	FBgn0030050	2760	25907	22712	20807
FBgn0037554	FBgn0259937	FBgn0029629	FBgn0030051	84986	92211	22717	20810
FBgn0033988	FBgn0039752	FBgn0029648	FBgn0030078	6935	84302	22722	20815
FBgn0000541	FBgn0050046	FBgn0029664	FBgn0030079	6934	53616	22724	20842
FBgn0052412	FBgn0035982	FBgn0029689	FBgn0030086	7090	1268	22750	20847
FBgn0038842	FBgn0015622	FBgn0029709	FBgn0030098	20	1795	22751	20849
FBgn0039704	FBgn0031851	FBgn0029713	FBgn0030103	23363	53844	22754	20855
FBgn0029521	FBgn0036428	FBgn0029715	FBgn0030122	23241	10982	22762	20874
FBgn0000283	FBgn0035010	FBgn0029720	FBgn0030148	51574	9890	22763	20893
FBgn0053111	FBgn0039183	FBgn0029738	FBgn0030156	23333	23178	22779	20908
FBgn0030812	FBgn0037718	FBgn0029762	FBgn0030158	23500	25941	22793	20918
FBgn0037750	FBgn0029766	FBgn0029763	FBgn0030159	23325	23349	23790	20927
FBgn0050042	FBgn0050263	FBgn0029764	FBgn0030174	23102	221692	23801	20928
FBgn0260749	FBgn0086604	FBgn0029765	FBgn0030183	875	6505	23802	20947
FBgn0032850	FBgn0029769	FBgn0029766	FBgn0030218	26030	23305	23806	20970
FBgn0031800	FBgn0002562	FBgn0029785	FBgn0030234	57493	801	23808	20980
FBgn0034139	FBgn0029864	FBgn0029791	FBgn0030237	8939	5164	23827	21336
FBgn0051029	FBgn0052207	FBgn0029798	FBgn0030240	26043	5985	23854	21341
FBgn0014380	FBgn0041711	FBgn0029801	FBgn0030245	8495	498	23856	21345
FBgn0029736	FBgn0032172	FBgn0029804	FBgn0030252	23034	26033	23872	21346
FBgn0011481	FBgn0028962	FBgn0029813	FBgn0030258	84909	5179	23873	21349
FBgn0034887	FBgn0027571	FBgn0029820	FBgn0030259	4038	9456	23874	21366
FBgn0032670	FBgn0031016	FBgn0029823	FBgn0030260	4493	115703	23912	21372
FBgn0038733	FBgn0028499	FBgn0029826	FBgn0030262	124565	3752	23922	21374
FBgn0013675	FBgn0029942	FBgn0029828	FBgn0030263	26009	440073	23934	21386
FBgn0040529	FBgn0028955	FBgn0029831	FBgn0030271	23097	2898	23938	21389
FBgn0015623	FBgn0036211	FBgn0029833	FBgn0030272	7779	1350	23947	21399
FBgn0015279	FBgn0259216	FBgn0029839	FBgn0030286	5965	5521	23954	21408
FBgn0032135	FBgn0036585	FBgn0029849	FBgn0030289	5978	5434	23963	21411
FBgn0030479	FBgn0033710	FBgn0029854	FBgn0030300	221749	23732	23965	21414
FBgn0003206	FBgn0037051	FBgn0029856	FBgn0030304	6526	23329	23980	21415
FBgn0033624	FBgn0034605	FBgn0029858	FBgn0030309	57007	6750	23986	21417
FBgn0052369	FBgn0031327	FBgn0029863	FBgn0030310	130872	375057	23992	21429
FBgn0033138	FBgn0030638	FBgn0029866	FBgn0030317	113146	4293	23996	21452
FBgn0036622	FBgn0000406	FBgn0029867	FBgn0030318	138151	57863	24000	21646
FBgn0037261	FBgn0002930	FBgn0029868	FBgn0030322	23189	138046	24004	21676
FBgn0037090	FBgn0259222	FBgn0029881	FBgn0030330	56987	29799	24010	21678
FBgn0019952	FBgn0052699	FBgn0029882	FBgn0030332	6093	23359	24014	21682
FBgn0023537	FBgn0035515	FBgn0029896	FBgn0030339	23242	23285	24030	21685
FBgn0031784	FBgn0030830	FBgn0029898	FBgn0030343	56829	4978	24044	21743
FBgn0033289	FBgn0038749	FBgn0029915	FBgn0030348	23150	10740	24051	21754
FBgn0036690	FBgn0015569	FBgn0029920	FBgn0030357	1117	9260	24056	21763
FBgn0030317	FBgn0034198	FBgn0029929	FBgn0030367	55023	6710	24057	21770
FBgn0010909	FBgn0035283	FBgn0029930	FBgn0030369	11046	23457	24082	21781
FBgn0026238	FBgn0038412	FBgn0029932	FBgn0030385	5578	998	24099	21802
FBgn0034894	FBgn0031449	FBgn0029937	FBgn0030398	1287	55752	24100	21812
FBgn0063494	FBgn0036984	FBgn0029948	FBgn0030400	4752	478	24131	21814
FBgn0039811	FBgn0000078	FBgn0029959	FBgn0030403	54103	259217	24132	21823
FBgn0031313	FBgn0034229	FBgn0029969	FBgn0030425	6670	25827	26370	21824
FBgn0050269	FBgn0028968	FBgn0029971	FBgn0030432	1028	9063	26371	21827
FBgn0023540	FBgn0000409	FBgn0029975	FBgn0030437	23247	10369	26372	21830
FBgn0038042	FBgn0038683	FBgn0029986	FBgn0030438	108	10776	26373	21835
FBgn0086347	FBgn0031716	FBgn0029990	FBgn0030467	23328	1131	26383	21844
FBgn0037440	FBgn0036560	FBgn0029994	FBgn0030469	23194	5063	26394	21846
FBgn0035235	FBgn0035032	FBgn0030013	FBgn0030478	115123	2138	26398	21853
FBgn0002924	FBgn0038199	FBgn0030014	FBgn0030482	10346	1812	26408	21856
FBgn0039167	FBgn0041713	FBgn0030026	FBgn0030484	4750	2830	26409	21859
FBgn0000442	FBgn0052708	FBgn0030027	FBgn0030486	55559	23324	26412	21871
FBgn0035967	FBgn0038302	FBgn0030028	FBgn0030504	10413	150967	26414	21885
FBgn0030881	FBgn0029736	FBgn0030034	FBgn0030505	26275	26034	26436	21886
FBgn0037163	FBgn0261593	FBgn0030038	FBgn0030510	54454	168544	26450	21907
FBgn0012042	FBgn0036335	FBgn0030040	FBgn0030554	9659	534	26456	21912
FBgn0038679	FBgn0031948	FBgn0030041	FBgn0030555	286148	25758	26458	21916
FBgn0259100	FBgn0013675	FBgn0030048	FBgn0030574	124152	23109	26462	21928
FBgn0053460	FBgn0000715	FBgn0030053	FBgn0030575	23209	1004	26557	21933
FBgn0034002	FBgn0029857	FBgn0030060	FBgn0030576	11216	23504	26569	21938
FBgn0038201	FBgn0035524	FBgn0030061	FBgn0030588	6185	7754	26611	21940
FBgn0039043	FBgn0032050	FBgn0030067	FBgn0030589	11037	84679	26757	21945
FBgn0259246	FBgn0015623	FBgn0030073	FBgn0030600	1291	8502	26874	21954
FBgn0086357	FBgn0038606	FBgn0030079	FBgn0030603	23314	25854	26878	21961
FBgn0039737	FBgn0034103	FBgn0030081	FBgn0030608	22902	127833	26879	21976
FBgn0031208	FBgn0250837	FBgn0030086	FBgn0030615	23114	9508	26886	21987
FBgn0028683	FBgn0004623	FBgn0030087	FBgn0030628	92689	26050	26896	22003
FBgn0260944	FBgn0023527	FBgn0030102	FBgn0030629	25992	351	26897	22004
FBgn0036239	FBgn0036622	FBgn0030151	FBgn0030634	2150	22848	26913	22018
FBgn0040227	FBgn0032470	FBgn0030157	FBgn0030640	5094	8539	26920	22021
FBgn0004654	FBgn0031381	FBgn0030159	FBgn0030646	3908	2901	26921	22022
FBgn0032731	FBgn0031064	FBgn0030160	FBgn0030653	50486	8497	26922	22027
FBgn0085443	FBgn0032881	FBgn0030163	FBgn0030658	146542	286205	26926	22033
FBgn0045473	FBgn0032479	FBgn0030164	FBgn0030660	222161	25787	26932	22036
FBgn0034728	FBgn0037090	FBgn0030178	FBgn0030662	3837	54550	26934	22051
FBgn0031048	FBgn0262952	FBgn0030183	FBgn0030670	29896	9024	26946	22065
FBgn0036558	FBgn0026718	FBgn0030187	FBgn0030688	657	54874	26949	22068
FBgn0034692	FBgn0019952	FBgn0030189	FBgn0030706	187	11189	26950	22122
FBgn0013813	FBgn0053988	FBgn0030192	FBgn0030716	3384	9758	26992	22129
FBgn0259823	FBgn0029854	FBgn0030195	FBgn0030723	1298	80028	27029	22141
FBgn0039113	FBgn0023537	FBgn0030208	FBgn0030745	4494	1759	27053	22145
FBgn0260799	FBgn0025832	FBgn0030218	FBgn0030747	6432	349152	27054	22163
FBgn0029067	FBgn0022959	FBgn0030230	FBgn0030749	3831	55966	27057	22174
FBgn0034265	FBgn0025815	FBgn0030239	FBgn0030755	25891	57172	27058	22190
FBgn0004449	FBgn0024230	FBgn0030241	FBgn0030761	6657	10440	27059	22196
FBgn0036551	FBgn0025625	FBgn0030244	FBgn0030768	55660	8301	27061	22210
FBgn0261563	FBgn0050269	FBgn0030251	FBgn0030769	9295	63982	27062	22213
FBgn0035582	FBgn0032923	FBgn0030263	FBgn0030774	56890	26220	27078	22217
FBgn0001224	FBgn0031713	FBgn0030270	FBgn0030775	28996	6543	27096	22221
FBgn0021795	FBgn0023540	FBgn0030271	FBgn0030776	3643	6801	27103	22239
FBgn0031698	FBgn0038042	FBgn0030294	FBgn0030796	3075	57711	27204	22264
FBgn0025628	FBgn0028327	FBgn0030296	FBgn0030797	10215	154661	27223	22319
FBgn0038463	FBgn0037440	FBgn0030305	FBgn0030808	79789	255057	27224	22330
FBgn0031559	FBgn0003091	FBgn0030306	FBgn0030816	9413	440193	27267	22333
FBgn0261811	FBgn0263077	FBgn0030309	FBgn0030817	3105	10299	27355	22337
FBgn0033269	FBgn0003356	FBgn0030310	FBgn0030828	57188	56271	27357	22339
FBgn0030357	FBgn0023549	FBgn0030318	FBgn0030838	10418	9077	27359	22342
FBgn0051473	FBgn0034602	FBgn0030321	FBgn0030841	10521	9515	27361	22346
FBgn0037304	FBgn0037163	FBgn0030322	FBgn0030844	6421	22986	27374	22354
FBgn0035086	FBgn0024315	FBgn0030326	FBgn0030852	8519	202559	27385	22367
FBgn0053169	FBgn0038679	FBgn0030327	FBgn0030858	55353	9215	27386	22370
FBgn0000636	FBgn0086367	FBgn0030328	FBgn0030870	7018	5621	27388	22371
FBgn0037064	FBgn0034225	FBgn0030331	FBgn0030883	4604	6597	27392	22379
FBgn0003721	FBgn0030251	FBgn0030332	FBgn0030890	8880	91752	27393	22380
FBgn0033431	FBgn0035499	FBgn0030334	FBgn0030894	5625	26999	27402	22393
FBgn0033556	FBgn0086357	FBgn0030336	FBgn0030897	56171	29978	27403	22401
FBgn0010265	FBgn0039737	FBgn0030347	FBgn0030904	30	4946	27404	22417
FBgn0261606	FBgn0037513	FBgn0030351	FBgn0030925	3178	22987	27407	22419
FBgn0001233	FBgn0032821	FBgn0030360	FBgn0030946	57235	25876	27413	22421
FBgn0039857	FBgn0033054	FBgn0030362	FBgn0030949	9802	23162	27414	22423
FBgn0052461	FBgn0035285	FBgn0030367	FBgn0030954	8496	22999	27428	22428
FBgn0003321	FBgn0083970	FBgn0030396	FBgn0030955	8991	1607	27660	22619
FBgn0051774	FBgn0011829	FBgn0030398	FBgn0030960	5205	56112	27784	22626
FBgn0032339	FBgn0004654	FBgn0030407	FBgn0030985	4915	2193	27981	22631
FBgn0032409	FBgn0039207	FBgn0030425	FBgn0030990	1195	2115	27999	22640
FBgn0051871	FBgn0029863	FBgn0030435	FBgn0030993	7840	23271	28006	22642
FBgn0034396	FBgn0032731	FBgn0030447	FBgn0030994	90338	57446	28015	22644
FBgn0028481	FBgn0038929	FBgn0030451	FBgn0030997	57798	2023	28030	22671
FBgn0263132	FBgn0085443	FBgn0030452	FBgn0031004	23580	8720	28035	22678
FBgn0030586	FBgn0040653	FBgn0030456	FBgn0031011	388677	51386	28080	22687
FBgn0038524	FBgn0031048	FBgn0030457	FBgn0031012	1523	7763	28109	22694
FBgn0038262	FBgn0036558	FBgn0030465	FBgn0031020	54470	55754	28126	22718
FBgn0032136	FBgn0030575	FBgn0030478	FBgn0031034	10443	51155	28193	22759
FBgn0259176	FBgn0035512	FBgn0030481	FBgn0031037	23090	23585	28200	22761
FBgn0050462	FBgn0038436	FBgn0030482	FBgn0031039	2017	4697	28240	22770
FBgn0003996	FBgn0024290	FBgn0030484	FBgn0031042	5129	51495	28295	22780
FBgn0039326	FBgn0035582	FBgn0030502	FBgn0031044	636	51646	29805	22782
FBgn0003041	FBgn0016126	FBgn0030507	FBgn0031048	84898	10652	29806	22786
FBgn0260942	FBgn0260474	FBgn0030511	FBgn0031052	55233	80762	29812	22789
FBgn0031694	FBgn0021795	FBgn0030512	FBgn0031053	10157	28969	29816	22791
FBgn0015872	FBgn0038156	FBgn0030518	FBgn0031055	9725	57003	29859	23789
FBgn0031580	FBgn0011766	FBgn0030519	FBgn0031068	6464	51652	29864	23792
FBgn0036995	FBgn0031971	FBgn0030521	FBgn0031069	6046	51466	30045	23797
FBgn0034758	FBgn0052037	FBgn0030528	FBgn0031077	22906	51400	30052	23807
FBgn0011770	FBgn0025628	FBgn0030545	FBgn0031078	57556	51108	30056	23825
FBgn0039297	FBgn0260964	FBgn0030558	FBgn0031081	8334	4282	30838	23834
FBgn0011016	FBgn0037843	FBgn0030562	FBgn0031090	6648	56937	30930	23853
FBgn0033926	FBgn0038463	FBgn0030570	FBgn0031107	2098	29888	30940	23857
FBgn0003076	FBgn0031559	FBgn0030575	FBgn0031111	9546	55827	30944	23859
FBgn0033809	FBgn0000711	FBgn0030576	FBgn0031118	5228	55245	30951	23871
FBgn0262150	FBgn0038205	FBgn0030581	FBgn0031119	2803	56888	30955	23876
FBgn0000414	FBgn0031908	FBgn0030584	FBgn0031148	23126	29105	30957	23879
FBgn0003884	FBgn0261505	FBgn0030588	FBgn0031170	10758	27018	30959	23882
FBgn0050382	FBgn0033269	FBgn0030589	FBgn0031171	653188	7260	50490	23885
FBgn0031562	FBgn0031182	FBgn0030592	FBgn0031182	285231	51143	50501	23890
FBgn0034140	FBgn0030357	FBgn0030593	FBgn0031186	5364	27075	50525	23892
FBgn0030625	FBgn0041087	FBgn0030603	FBgn0031191	170960	22822	50540	23894
FBgn0003256	FBgn0001225	FBgn0030605	FBgn0031208	23002	2287	50721	23908
FBgn0260444	FBgn0033431	FBgn0030606	FBgn0031213	26027	64061	50724	23919
FBgn0003353	FBgn0039627	FBgn0030607	FBgn0031219	4174	29088	50767	23924
FBgn0033728	FBgn0010265	FBgn0030608	FBgn0031220	6917	79567	50768	23936
FBgn0030041	FBgn0020257	FBgn0030610	FBgn0031240	3913	8303	50771	23942
FBgn0032024	FBgn0261606	FBgn0030612	FBgn0031249	182	51138	50773	23948
FBgn0052850	FBgn0034255	FBgn0030617	FBgn0031250	57551	5763	50784	23956
FBgn0028663	FBgn0014133	FBgn0030638	FBgn0031257	8938	54976	50788	23964
FBgn0052194	FBgn0013678	FBgn0030640	FBgn0031261	80036	55148	50790	23966
FBgn0086904	FBgn0001233	FBgn0030668	FBgn0031265	6347	3163	50797	23969
FBgn0000289	FBgn0039857	FBgn0030672	FBgn0031267	9639	60491	50799	23970
FBgn0036512	FBgn0262601	FBgn0030691	FBgn0031294	51364	8195	50850	23972
FBgn0262532	FBgn0034731	FBgn0030703	FBgn0031299	2064	4702	50877	23984
FBgn0033817	FBgn0031312	FBgn0030707	FBgn0031305	7852	57132	50887	23988
FBgn0027556	FBgn0050424	FBgn0030720	FBgn0031306	23313	79624	50905	23994
FBgn0030060	FBgn0038524	FBgn0030724	FBgn0031307	9709	4708	50913	23999
FBgn0036257	FBgn0038262	FBgn0030731	FBgn0031315	23051	50861	50914	24001
FBgn0050108	FBgn0038627	FBgn0030733	FBgn0031317	3108	4338	50915	24012
FBgn0003448	FBgn0032136	FBgn0030737	FBgn0031327	4499	9240	50917	24050
FBgn0029868	FBgn0262954	FBgn0030738	FBgn0031359	55314	4710	50918	24058
FBgn0044011	FBgn0003996	FBgn0030740	FBgn0031360	91807	57496	50931	24064
FBgn0013272	FBgn0010078	FBgn0030749	FBgn0031367	29927	79016	50995	24074
FBgn0052523	FBgn0034687	FBgn0030752	FBgn0031373	6277	23413	51792	24105
FBgn0031675	FBgn0025640	FBgn0030763	FBgn0031374	64114	54704	51797	24109
FBgn0040009	FBgn0035829	FBgn0030773	FBgn0031389	11180	9616	51800	24111
FBgn0051959	FBgn0021874	FBgn0030778	FBgn0031399	373156	51422	51813	26356
FBgn0038930	FBgn0025684	FBgn0030799	FBgn0031405	2	55450	51869	26360
FBgn0034761	FBgn0034010	FBgn0030802	FBgn0031414	11031	57162	51886	26362
FBgn0003062	FBgn0086447	FBgn0030805	FBgn0031421	718	55859	51938	26377
FBgn0034394	FBgn0050158	FBgn0030828	FBgn0031434	51280	80145	52009	26379
FBgn0053995	FBgn0036995	FBgn0030830	FBgn0031457	58533	79641	52028	26399
FBgn0038420	FBgn0035631	FBgn0030839	FBgn0031461	51125	29887	52036	26400
FBgn0032673	FBgn0037581	FBgn0030847	FBgn0031489	55740	26273	52055	26401
FBgn0003941	FBgn0034758	FBgn0030855	FBgn0031490	79811	65981	52076	26403
FBgn0033551	FBgn0011770	FBgn0030863	FBgn0031515	64759	80135	52120	26404
FBgn0015019	FBgn0026373	FBgn0030876	FBgn0031516	55819	28978	52245	26406
FBgn0033636	FBgn0037995	FBgn0030878	FBgn0031520	51056	51765	52348	26413
FBgn0030029	FBgn0037880	FBgn0030894	FBgn0031528	394	54914	52389	26416
FBgn0005634	FBgn0039297	FBgn0030895	FBgn0031530	55914	64748	52430	26422
FBgn0032779	FBgn0011016	FBgn0030904	FBgn0031533	54918	51306	52463	26428
FBgn0035521	FBgn0033926	FBgn0030921	FBgn0031537	29115	55201	52466	26451
FBgn0261584	FBgn0003076	FBgn0030926	FBgn0031538	116496	54985	52480	26459
FBgn0038938	FBgn0036607	FBgn0030930	FBgn0031548	51186	55030	52502	26556
FBgn0035199	FBgn0030182	FBgn0030949	FBgn0031563	11177	79762	52552	26561
FBgn0032727	FBgn0031914	FBgn0030958	FBgn0031571	51170	56954	52563	26562
FBgn0031850	FBgn0050382	FBgn0030966	FBgn0031580	58472	4696	52585	26563
FBgn0032036	FBgn0000100	FBgn0030968	FBgn0031622	7570	55847	52589	26568
FBgn0062412	FBgn0034140	FBgn0030976	FBgn0031627	64943	23400	52592	26877
FBgn0051354	FBgn0032116	FBgn0030985	FBgn0031629	10723	51617	52666	26887
FBgn0040965	FBgn0260444	FBgn0030991	FBgn0031631	55858	51650	52696	26889
FBgn0037607	FBgn0038746	FBgn0031002	FBgn0031632	51071	51195	52710	26895
FBgn0039266	FBgn0030041	FBgn0031012	FBgn0031635	55893	64219	52822	26919
FBgn0038256	FBgn0032896	FBgn0031021	FBgn0031643	56882	93974	52837	26931
FBgn0003205	FBgn0036290	FBgn0031030	FBgn0031645	29965	51310	52857	26936
FBgn0028540	FBgn0052194	FBgn0031037	FBgn0031649	65265	55638	52858	26938
FBgn0038084	FBgn0033904	FBgn0031040	FBgn0031650	79443	26470	52892	26940
FBgn0032707	FBgn0031653	FBgn0031049	FBgn0031653	2872	79751	52898	26941
FBgn0046999	FBgn0032820	FBgn0031050	FBgn0031654	59342	79154	52906	26943
FBgn0005672	FBgn0014020	FBgn0031057	FBgn0031675	712	5583	53310	26972
FBgn0027569	FBgn0010288	FBgn0031066	FBgn0031689	23683	64754	53320	27052
FBgn0000261	FBgn0027556	FBgn0031068	FBgn0031692	51111	54836	53328	27056
FBgn0054057	FBgn0030060	FBgn0031069	FBgn0031693	80230	56904	53331	27205
FBgn0027779	FBgn0052372	FBgn0031092	FBgn0031694	63901	55228	53334	27226
FBgn0052056	FBgn0010414	FBgn0031097	FBgn0031695	58526	23462	53357	27261
FBgn0260386	FBgn0001253	FBgn0031110	FBgn0031697	60485	51728	53375	27364
FBgn0003475	FBgn0036750	FBgn0031115	FBgn0031700	79665	57180	53381	27369
FBgn0030590	FBgn0035878	FBgn0031117	FBgn0031713	56898	54997	53413	27389
FBgn0043791	FBgn0044011	FBgn0031126	FBgn0031717	51315	81831	53419	27390
FBgn0031781	FBgn0039471	FBgn0031142	FBgn0031725	114885	64837	53420	27410
FBgn0035022	FBgn0037415	FBgn0031143	FBgn0031734	55366	79176	53424	27416
FBgn0035688	FBgn0038930	FBgn0031145	FBgn0031737	89797	55344	53609	27421
FBgn0038206	FBgn0034761	FBgn0031148	FBgn0031741	55365	27344	53619	27425
FBgn0035279	FBgn0003062	FBgn0031161	FBgn0031745	51053	56521	53626	27426
FBgn0031629	FBgn0031684	FBgn0031182	FBgn0031752	55213	25789	53858	27643
FBgn0033661	FBgn0034394	FBgn0031184	FBgn0031760	25796	55435	53867	27681
FBgn0002926	FBgn0039017	FBgn0031190	FBgn0031770	54832	11178	53869	27762
FBgn0003870	FBgn0036271	FBgn0031195	FBgn0031771	54820	57419	53870	27801
FBgn0034883	FBgn0031224	FBgn0031217	FBgn0031775	25959	79039	53871	27965
FBgn0046685	FBgn0033876	FBgn0031228	FBgn0031782	29103	51303	53885	28000
FBgn0014184	FBgn0032512	FBgn0031238	FBgn0031791	54919	5950	53886	28010
FBgn0028645	FBgn0003941	FBgn0031244	FBgn0031805	8462	144404	53902	28018
FBgn0038303	FBgn0026263	FBgn0031245	FBgn0031808	7227	11275	54003	28019
FBgn0001123	FBgn0031627	FBgn0031250	FBgn0031813	79960	51341	54006	28042
FBgn0263241	FBgn0039590	FBgn0031256	FBgn0031814	54463	29106	54122	28075
FBgn0026409	FBgn0031830	FBgn0031260	FBgn0031816	54963	54958	54124	28077
FBgn0004197	FBgn0003502	FBgn0031265	FBgn0031821	64761	79605	54128	28081
FBgn0021847	FBgn0261976	FBgn0031268	FBgn0031836	55268	79589	54138	28114
FBgn0039257	FBgn0033132	FBgn0031282	FBgn0031850	9935	55753	54140	28135
FBgn0026427	FBgn0024891	FBgn0031285	FBgn0031854	55131	57415	54141	28185
FBgn0030336	FBgn0039430	FBgn0031305	FBgn0031865	51696	29789	54160	28199
FBgn0259211	FBgn0032779	FBgn0031307	FBgn0031866	51278	26289	54196	28250
FBgn0030731	FBgn0038938	FBgn0031312	FBgn0031869	64778	10678	54200	28253
FBgn0026376	FBgn0035199	FBgn0031313	FBgn0031885	79666	54839	54201	29811
FBgn0038173	FBgn0029980	FBgn0031320	FBgn0031888	10186	64921	54208	29815
FBgn0010382	FBgn0261046	FBgn0031327	FBgn0031903	8291	79012	54352	29819
FBgn0050122	FBgn0032129	FBgn0031335	FBgn0031905	10763	4674	54353	29820
FBgn0053465	FBgn0031356	FBgn0031360	FBgn0031914	8934	55061	54357	29861
FBgn0039830	FBgn0062412	FBgn0031362	FBgn0031925	65983	8506	54364	29863
FBgn0005674	FBgn0051354	FBgn0031376	FBgn0031927	54953	55076	54373	29867
FBgn0005671	FBgn0038346	FBgn0031381	FBgn0031929	28984	23548	54378	29871
FBgn0044047	FBgn0010226	FBgn0031395	FBgn0031935	55167	25830	54384	29873
FBgn0038633	FBgn0037607	FBgn0031399	FBgn0031939	51444	55188	54391	29875
FBgn0053322	FBgn0035337	FBgn0031405	FBgn0031945	79101	54968	54392	30050
FBgn0010395	FBgn0039266	FBgn0031414	FBgn0031948	55227	56924	54411	30785
FBgn0034654	FBgn0035667	FBgn0031417	FBgn0031950	55636	24141	54418	30839
FBgn0031940	FBgn0039768	FBgn0031418	FBgn0031968	2217	58189	54561	30843
FBgn0085481	FBgn0038256	FBgn0031428	FBgn0031969	10644	55176	54598	30853
FBgn0086902	FBgn0028540	FBgn0031432	FBgn0031970	29940	64919	54624	30927
FBgn0066292	FBgn0020443	FBgn0031434	FBgn0031971	51673	6785	54635	30932
FBgn0037057	FBgn0032833	FBgn0031437	FBgn0031973	64318	10683	54637	30941
FBgn0031645	FBgn0025631	FBgn0031449	FBgn0031974	55421	56675	54638	30947
FBgn0063667	FBgn0030913	FBgn0031457	FBgn0031975	57088	25837	54646	30949
FBgn0015324	FBgn0043791	FBgn0031459	FBgn0031976	4851	54769	54652	50496
FBgn0039686	FBgn0028411	FBgn0031460	FBgn0031993	54680	64393	54721	50497
FBgn0046878	FBgn0011818	FBgn0031464	FBgn0031995	3226	29967	55927	50500
FBgn0003460	FBgn0039127	FBgn0031470	FBgn0031998	80010	51761	55934	50708
FBgn0038714	FBgn0031925	FBgn0031471	FBgn0032002	348995	51440	55936	50723
FBgn0069913	FBgn0031629	FBgn0031474	FBgn0032004	51316	59353	55947	50765
FBgn0002985	FBgn0030619	FBgn0031478	FBgn0032006	55790	55512	55980	50772
FBgn0259934	FBgn0037298	FBgn0031479	FBgn0032010	51741	163486	55988	50781
FBgn0039897	FBgn0046685	FBgn0031483	FBgn0032018	26207	29767	55991	50782
FBgn0035040	FBgn0030616	FBgn0031497	FBgn0032021	64236	55799	55992	50787
FBgn0039911	FBgn0015663	FBgn0031498	FBgn0032023	51285	9840	56009	50875
FBgn0035268	FBgn0026409	FBgn0031500	FBgn0032025	80022	54886	56017	50876
FBgn0031771	FBgn0025574	FBgn0031501	FBgn0032029	80173	80758	56041	50884
FBgn0026403	FBgn0028970	FBgn0031505	FBgn0032042	79583	64130	56043	50912
FBgn0038250	FBgn0033912	FBgn0031515	FBgn0032048	79651	54438	56045	50932
FBgn0020306	FBgn0037099	FBgn0031516	FBgn0032049	58494	55190	56046	50934
FBgn0033708	FBgn0039257	FBgn0031519	FBgn0032059	28232	79698	56048	51789
FBgn0032147	FBgn0039682	FBgn0031530	FBgn0032066	79957	54551	56050	51791
FBgn0038983	FBgn0016081	FBgn0031535	FBgn0032068	55540	50632	56069	51795
FBgn0041712	FBgn0027914	FBgn0031538	FBgn0032069	54436	29118	56070	51796
FBgn0014464	FBgn0033538	FBgn0031542	FBgn0032076	79618	55321	56075	51799
FBgn0040261	FBgn0039313	FBgn0031547	FBgn0032079	79663	55359	56077	51801
FBgn0037238	FBgn0030731	FBgn0031549	FBgn0032109	64783	56172	56150	51812
FBgn0004395	FBgn0003068	FBgn0031558	FBgn0032123	27345	79772	56173	51897
FBgn0033376	FBgn0003357	FBgn0031559	FBgn0032127	54762	53822	56174	52004
FBgn0019830	FBgn0015774	FBgn0031560	FBgn0032129	79652	26507	56194	52014
FBgn0000079	FBgn0262598	FBgn0031561	FBgn0032136	64344	79923	56195	52024
FBgn0024361	FBgn0037993	FBgn0031563	FBgn0032138	51374	57338	56199	52187
FBgn0036680	FBgn0036143	FBgn0031564	FBgn0032139	79778	54542	56207	52202
FBgn0038450	FBgn0033453	FBgn0031566	FBgn0032140	51008	57118	56215	52250
FBgn0034797	FBgn0024245	FBgn0031571	FBgn0032144	374354	27042	56228	52335
FBgn0052009	FBgn0027621	FBgn0031589	FBgn0032156	10365	27012	56229	52372
FBgn0037713	FBgn0005674	FBgn0031623	FBgn0032167	64762	54112	56233	52392
FBgn0001125	FBgn0044047	FBgn0031629	FBgn0032170	55704	10858	56258	52398
FBgn0050503	FBgn0263256	FBgn0031634	FBgn0032180	55771	26575	56273	52468
FBgn0050203	FBgn0024958	FBgn0031643	FBgn0032181	192669	55509	56274	52477
FBgn0085485	FBgn0014000	FBgn0031645	FBgn0032191	79152	10777	56278	52530
FBgn0030091	FBgn0034259	FBgn0031646	FBgn0032197	404093	54212	56279	52535
FBgn0262511	FBgn0000256	FBgn0031654	FBgn0032202	64359	29761	56292	52538
FBgn0000221	FBgn0031986	FBgn0031662	FBgn0032224	26511	9348	56294	52609
FBgn0029629	FBgn0037057	FBgn0031692	FBgn0032228	55841	11255	56307	52626
FBgn0028546	FBgn0034141	FBgn0031693	FBgn0032230	79858	80034	56316	52633
FBgn0011693	FBgn0032004	FBgn0031694	FBgn0032262	64221	55711	56317	52690
FBgn0015402	FBgn0030329	FBgn0031701	FBgn0032281	3773	1005	56321	52717
FBgn0031701	FBgn0010415	FBgn0031702	FBgn0032282	79627	10243	56322	52808
FBgn0033639	FBgn0039630	FBgn0031703	FBgn0032286	51365	57596	56324	52815
FBgn0054027	FBgn0031055	FBgn0031717	FBgn0032295	63895	79948	56330	52840
FBgn0027515	FBgn0259934	FBgn0031734	FBgn0032297	64231	26355	56348	52855
FBgn0019643	FBgn0038395	FBgn0031737	FBgn0032322	64421	476	56349	52882
FBgn0038548	FBgn0033718	FBgn0031738	FBgn0032330	55329	81873	56360	52897
FBgn0032979	FBgn0039809	FBgn0031764	FBgn0032331	65990	81849	56361	52915
FBgn0015567	FBgn0243512	FBgn0031775	FBgn0032336	9499	81034	56367	53311
FBgn0034390	FBgn0037094	FBgn0031781	FBgn0032382	5101	55607	56369	53312
FBgn0035873	FBgn0026403	FBgn0031791	FBgn0032400	114327	258	56370	53321
FBgn0029506	FBgn0038250	FBgn0031800	FBgn0032401	51191	26960	56371	53322
FBgn0001226	FBgn0037901	FBgn0031801	FBgn0032402	79667	54715	56384	53324
FBgn0027929	FBgn0085220	FBgn0031813	FBgn0032405	79739	81558	56386	53376
FBgn0039324	FBgn0000313	FBgn0031814	FBgn0032414	55026	727800	56397	53378
FBgn0031306	FBgn0027654	FBgn0031824	FBgn0032416	28231	54332	56398	53412
FBgn0036446	FBgn0019830	FBgn0031830	FBgn0032422	4054	2845	56404	53418
FBgn0085354	FBgn0015277	FBgn0031854	FBgn0032429	28965	30820	56406	53598
FBgn0022774	FBgn0050489	FBgn0031858	FBgn0032431	54971	2259	56412	53605
FBgn0032266	FBgn0033593	FBgn0031860	FBgn0032433	93	30819	56422	53612
FBgn0261859	FBgn0038916	FBgn0031865	FBgn0032435	55142	81555	56427	53623
FBgn0040985	FBgn0024361	FBgn0031877	FBgn0032451	51478	81892	56431	53625
FBgn0037612	FBgn0052050	FBgn0031881	FBgn0032456	63933	81533	56433	53627
FBgn0036702	FBgn0261549	FBgn0031888	FBgn0032470	84172	7259	56434	53761
FBgn0033696	FBgn0011577	FBgn0031897	FBgn0032479	3781	22980	56440	53814
FBgn0031251	FBgn0263033	FBgn0031907	FBgn0032484	60484	51606	56442	53859
FBgn0030187	FBgn0033485	FBgn0031908	FBgn0032485	79645	51451	56444	53883
FBgn0086368	FBgn0035558	FBgn0031912	FBgn0032497	55259	58528	56463	53890
FBgn0038829	FBgn0001125	FBgn0031913	FBgn0032498	79740	57787	56470	53892
FBgn0035444	FBgn0050503	FBgn0031914	FBgn0032505	4117	27092	56495	53901
FBgn0026315	FBgn0262481	FBgn0031926	FBgn0032507	25790	79135	56496	53972
FBgn0038484	FBgn0053494	FBgn0031927	FBgn0032512	64067	55863	56506	53978
FBgn0040687	FBgn0041182	FBgn0031935	FBgn0032521	55701	8911	56527	54004
FBgn0261434	FBgn0033741	FBgn0031936	FBgn0032536	11147	64981	56542	54120
FBgn0038834	FBgn0029629	FBgn0031937	FBgn0032549	60494	10923	56626	54137
FBgn0058298	FBgn0083228	FBgn0031942	FBgn0032587	79841	51560	56631	54194
FBgn0032422	FBgn0011693	FBgn0031957	FBgn0032601	7042	4747	56632	54325
FBgn0031813	FBgn0004855	FBgn0031969	FBgn0032603	25897	376267	56695	54338
FBgn0003308	FBgn0019929	FBgn0031971	FBgn0032609	23418	90806	56717	54343
FBgn0033968	FBgn0028694	FBgn0031974	FBgn0032613	28959	408	56726	54376
FBgn0034598	FBgn0027363	FBgn0031977	FBgn0032618	54537	203197	56736	54377
FBgn0028428	FBgn0039464	FBgn0031980	FBgn0032639	80258	57535	56737	54383
FBgn0016792	FBgn0035094	FBgn0031987	FBgn0032647	55205	253980	56747	54387
FBgn0250821	FBgn0051708	FBgn0031990	FBgn0032652	80705	131408	56748	54390
FBgn0013953	FBgn0034390	FBgn0031992	FBgn0032666	80097	84900	56771	54393
FBgn0040211	FBgn0085350	FBgn0031996	FBgn0032673	55707	6853	56772	54394
FBgn0011771	FBgn0035873	FBgn0031998	FBgn0032679	79939	81929	56784	54402
FBgn0031857	FBgn0029506	FBgn0032001	FBgn0032681	57728	57502	56786	54403
FBgn0003944	FBgn0014010	FBgn0032005	FBgn0032682	51129	2982	56795	54405
FBgn0087011	FBgn0001226	FBgn0032008	FBgn0032683	81035	150726	56839	54451
FBgn0038277	FBgn0083959	FBgn0032015	FBgn0032684	81031	90362	56856	54484
FBgn0259736	FBgn0038876	FBgn0032025	FBgn0032685	80975	2785	56873	54486
FBgn0038246	FBgn0040075	FBgn0032029	FBgn0032694	23406	54681	57028	54524
FBgn0034326	FBgn0031306	FBgn0032035	FBgn0032698	84223	8528	57257	54526
FBgn0020910	FBgn0039022	FBgn0032049	FBgn0032699	80896	55860	57260	54562
FBgn0037313	FBgn0022774	FBgn0032050	FBgn0032705	7855	10884	57262	54608
FBgn0033397	FBgn0032266	FBgn0032058	FBgn0032706	7145	5526	57294	54610
FBgn0040735	FBgn0040623	FBgn0032075	FBgn0032727	81493	60	57296	54612
FBgn0034743	FBgn0051198	FBgn0032076	FBgn0032731	10766	2597	57431	54615
FBgn0029820	FBgn0031213	FBgn0032084	FBgn0032741	8675	10438	57434	54631
FBgn0001104	FBgn0037612	FBgn0032109	FBgn0032752	55031	55737	57438	54636
FBgn0040660	FBgn0036702	FBgn0032116	FBgn0032753	6468	55207	57439	54645
FBgn0028519	FBgn0029839	FBgn0032120	FBgn0032772	56288	9547	57440	54667
FBgn0038349	FBgn0036851	FBgn0032124	FBgn0032773	79365	64327	57743	54683
FBgn0030735	FBgn0085249	FBgn0032135	FBgn0032774	11160	64423	57750	54722
FBgn0028336	FBgn0027095	FBgn0032138	FBgn0032775	84061	283871	57751	55938
FBgn0067102	FBgn0063497	FBgn0032160	FBgn0032788	51176	55284	57752	55942
FBgn0050147	FBgn0032408	FBgn0032161	FBgn0032789	7187	55347	57754	55948
FBgn0044826	FBgn0051606	FBgn0032162	FBgn0032798	7462	64225	57775	55960
FBgn0029939	FBgn0051380	FBgn0032167	FBgn0032810	4329	64776	57783	55979
FBgn0050438	FBgn0035043	FBgn0032187	FBgn0032816	28971	56896	57895	55984
FBgn0250732	FBgn0038834	FBgn0032192	FBgn0032817	63827	51209	57915	55990
FBgn0003015	FBgn0037128	FBgn0032198	FBgn0032821	55367	26230	58186	56012
FBgn0086909	FBgn0033095	FBgn0032205	FBgn0032836	26353	7532	58193	56018
FBgn0011288	FBgn0040351	FBgn0032213	FBgn0032840	10163	57414	58205	56032
FBgn0051706	FBgn0031877	FBgn0032214	FBgn0032843	2768	54940	58206	56044
FBgn0262828	FBgn0003308	FBgn0032216	FBgn0032850	2004	83939	58235	56086
FBgn0261339	FBgn0029994	FBgn0032218	FBgn0032856	57698	51699	58239	56149
FBgn0039532	FBgn0085412	FBgn0032224	FBgn0032879	51131	23582	58242	56187
FBgn0031885	FBgn0033079	FBgn0032242	FBgn0032886	220972	4716	58243	56188
FBgn0039316	FBgn0052683	FBgn0032253	FBgn0032888	9314	55122	58248	56210
FBgn0250785	FBgn0013433	FBgn0032264	FBgn0032889	55793	83605	58521	56212
FBgn0051810	FBgn0026439	FBgn0032266	FBgn0032901	400961	84280	58523	56213
FBgn0037063	FBgn0038166	FBgn0032271	FBgn0032906	2122	170463	58800	56218
FBgn0039223	FBgn0035238	FBgn0032282	FBgn0032908	32	29089	58810	56219
FBgn0039356	FBgn0038246	FBgn0032283	FBgn0032910	2018	64094	58859	56222
FBgn0038099	FBgn0016691	FBgn0032285	FBgn0032911	79971	51527	58865	56226
FBgn0033373	FBgn0030306	FBgn0032286	FBgn0032914	54800	55967	58875	56248
FBgn0032420	FBgn0083963	FBgn0032287	FBgn0032934	284325	55975	58998	56264
FBgn0039849	FBgn0262871	FBgn0032298	FBgn0032943	123872	55632	59003	56284
FBgn0261797	FBgn0020910	FBgn0032329	FBgn0032957	347902	59274	59008	56289
FBgn0037116	FBgn0085449	FBgn0032339	FBgn0032986	9510	27086	59016	56298
FBgn0034247	FBgn0027587	FBgn0032343	FBgn0033020	4848	51062	59024	56305
FBgn0036116	FBgn0033397	FBgn0032350	FBgn0033028	29956	60592	59026	56312
FBgn0262976	FBgn0034743	FBgn0032358	FBgn0033033	11000	58527	59032	56318
FBgn0262107	FBgn0037754	FBgn0032377	FBgn0033048	55616	55964	59036	56320
FBgn0003483	FBgn0031951	FBgn0032381	FBgn0033052	23677	84062	59042	56325
FBgn0039030	FBgn0004168	FBgn0032387	FBgn0033054	23446	84254	59044	56350
FBgn0040005	FBgn0028519	FBgn0032390	FBgn0033065	10016	9208	59049	56354
FBgn0038592	FBgn0011297	FBgn0032394	FBgn0033093	9667	10815	59058	56358
FBgn0259700	FBgn0038349	FBgn0032399	FBgn0033095	23764	51277	59092	56364
FBgn0030505	FBgn0085388	FBgn0032400	FBgn0033108	375449	51805	59125	56380
FBgn0040963	FBgn0028336	FBgn0032404	FBgn0033110	10025	93611	60344	56399
FBgn0260005	FBgn0067102	FBgn0032407	FBgn0033124	54910	6860	60345	56401
FBgn0034577	FBgn0262003	FBgn0032415	FBgn0033127	93643	11022	60455	56405
FBgn0051342	FBgn0067905	FBgn0032420	FBgn0033128	79155	57595	60527	56409
FBgn0035907	FBgn0032181	FBgn0032421	FBgn0033129	83937	10501	60530	56421
FBgn0037339	FBgn0032787	FBgn0032422	FBgn0033132	7942	5522	60594	56436
FBgn0025676	FBgn0034215	FBgn0032444	FBgn0033137	79701	7732	60597	56438
FBgn0032889	FBgn0033494	FBgn0032453	FBgn0033153	79890	84708	60613	56447
FBgn0038577	FBgn0051150	FBgn0032456	FBgn0033158	65264	84222	63830	56448
FBgn0038211	FBgn0038039	FBgn0032465	FBgn0033159	23603	23551	63872	56453
FBgn0050156	FBgn0016034	FBgn0032474	FBgn0033170	58508	56853	64010	56455
FBgn0011726	FBgn0053145	FBgn0032478	FBgn0033174	51114	84251	64050	56456
FBgn0034532	FBgn0003015	FBgn0032480	FBgn0033177	79901	114900	64051	56457
FBgn0052176	FBgn0040931	FBgn0032482	FBgn0033178	51667	23416	64075	56458
FBgn0052365	FBgn0050274	FBgn0032483	FBgn0033184	79956	84100	64213	56461
FBgn0004366	FBgn0036687	FBgn0032494	FBgn0033188	54443	51073	64242	56462
FBgn0031148	FBgn0039305	FBgn0032495	FBgn0033196	64215	55335	64290	56468
FBgn0031347	FBgn0003250	FBgn0032507	FBgn0033205	79047	54566	64293	56469
FBgn0035290	FBgn0037899	FBgn0032509	FBgn0033212	51115	83698	64295	56480
FBgn0041775	FBgn0032487	FBgn0032511	FBgn0033214	54165	84258	64339	56524
FBgn0033520	FBgn0037697	FBgn0032513	FBgn0033215	56254	284424	64383	56525
FBgn0020440	FBgn0051633	FBgn0032514	FBgn0033224	55331	7170	64384	56551
FBgn0036848	FBgn0051706	FBgn0032515	FBgn0033225	29097	63891	64424	56613
FBgn0261553	FBgn0053470	FBgn0032518	FBgn0033226	408	9615	64450	56637
FBgn0031233	FBgn0028940	FBgn0032538	FBgn0033235	64093	51335	64580	56699
FBgn0051973	FBgn0052282	FBgn0032585	FBgn0033250	54664	84649	64602	56711
FBgn0028939	FBgn0029763	FBgn0032590	FBgn0033265	56952	84518	64652	56722
FBgn0030981	FBgn0039316	FBgn0032596	FBgn0033266	57690	29993	64654	56724
FBgn0033970	FBgn0037063	FBgn0032597	FBgn0033268	29070	84707	64655	56760
FBgn0042182	FBgn0262869	FBgn0032600	FBgn0033273	51555	27439	64658	56809
FBgn0004893	FBgn0033373	FBgn0032603	FBgn0033289	54407	84529	64660	56811
FBgn0036862	FBgn0039849	FBgn0032609	FBgn0033292	51523	80333	64685	57080
FBgn0000052	FBgn0032236	FBgn0032613	FBgn0033294	81669	80331	64704	57264
FBgn0033755	FBgn0032857	FBgn0032614	FBgn0033297	50848	54865	64898	57274
FBgn0015034	FBgn0010241	FBgn0032637	FBgn0033303	64855	219771	64933	57276
FBgn0260486	FBgn0086254	FBgn0032638	FBgn0033304	51429	114569	65020	57295
FBgn0044810	FBgn0261285	FBgn0032639	FBgn0033307	30061	80727	65098	57319
FBgn0085411	FBgn0011638	FBgn0032640	FBgn0033309	83641	280636	65102	57330
FBgn0032008	FBgn0032603	FBgn0032643	FBgn0033310	29968	64756	65105	57339
FBgn0043536	FBgn0011202	FBgn0032668	FBgn0033320	84886	153527	65113	57340
FBgn0020414	FBgn0011837	FBgn0032669	FBgn0033326	83543	54602	65115	57740
FBgn0086689	FBgn0261451	FBgn0032670	FBgn0033327	54888	127262	65247	57745
FBgn0052602	FBgn0033475	FBgn0032682	FBgn0033339	51522	26258	65960	57746
FBgn0039595	FBgn0031249	FBgn0032684	FBgn0033347	51524	85465	65962	57776
FBgn0261983	FBgn0039451	FBgn0032685	FBgn0033352	6423	84916	65967	57778
FBgn0037117	FBgn0035936	FBgn0032689	FBgn0033353	29116	400916	65970	57810
FBgn0029507	FBgn0262146	FBgn0032698	FBgn0033358	58480	7357	66048	57816
FBgn0052364	FBgn0035870	FBgn0032703	FBgn0033366	222658	112942	66052	57869
FBgn0028479	FBgn0038845	FBgn0032704	FBgn0033372	51313	153090	66054	57912
FBgn0032652	FBgn0052190	FBgn0032715	FBgn0033382	91612	550643	66055	57914
FBgn0028983	FBgn0038052	FBgn0032719	FBgn0033387	64332	115024	66066	58172
FBgn0003435	FBgn0037339	FBgn0032726	FBgn0033391	83666	2035	66067	58175
FBgn0034515	FBgn0032889	FBgn0032729	FBgn0033395	84950	84918	66069	58180
FBgn0033778	FBgn0038211	FBgn0032734	FBgn0033397	84081	55466	66071	58200
FBgn0051716	FBgn0030603	FBgn0032770	FBgn0033402	55193	63908	66078	58208
FBgn0038214	FBgn0031736	FBgn0032772	FBgn0033403	26269	84687	66079	58212
FBgn0033724	FBgn0032684	FBgn0032774	FBgn0033423	55608	57583	66098	58220
FBgn0085466	FBgn0033791	FBgn0032779	FBgn0033426	55075	84926	66111	58226
FBgn0031474	FBgn0034291	FBgn0032780	FBgn0033437	1355	659	66114	58227
FBgn0004456	FBgn0038407	FBgn0032781	FBgn0033438	58475	84152	66120	58230
FBgn0036877	FBgn0031148	FBgn0032782	FBgn0033439	666	160760	66126	58234
FBgn0025641	FBgn0037137	FBgn0032783	FBgn0033443	84662	677809	66143	58244
FBgn0260795	FBgn0035290	FBgn0032785	FBgn0033448	26524	729082	66144	58246
FBgn0032022	FBgn0031969	FBgn0032790	FBgn0033453	25890	7871	66148	58249
FBgn0259163	FBgn0262955	FBgn0032791	FBgn0033458	84080	116841	66151	58250
FBgn0037409	FBgn0033520	FBgn0032799	FBgn0033476	57409	64983	66156	58807
FBgn0039014	FBgn0033232	FBgn0032801	FBgn0033482	2635	64744	66158	58869
FBgn0030958	FBgn0001098	FBgn0032803	FBgn0033483	5465	586	66161	58991
FBgn0032140	FBgn0046214	FBgn0032805	FBgn0033494	58191	57181	66171	58994
FBgn0052423	FBgn0031299	FBgn0032815	FBgn0033495	51715	132299	66172	59020
FBgn0032284	FBgn0050044	FBgn0032819	FBgn0033502	56963	135112	66193	59027
FBgn0037850	FBgn0028939	FBgn0032820	FBgn0033504	83690	131118	66196	59030
FBgn0259714	FBgn0030981	FBgn0032824	FBgn0033518	83987	55684	66197	59035
FBgn0029639	FBgn0031544	FBgn0032833	FBgn0033520	51776	93622	66201	59043
FBgn0027660	FBgn0035542	FBgn0032834	FBgn0033538	84249	84833	66204	59046
FBgn0259139	FBgn0038585	FBgn0032835	FBgn0033543	57467	54014	66208	59052
FBgn0086656	FBgn0034286	FBgn0032836	FBgn0033544	84282	2820	66226	59079
FBgn0030576	FBgn0042182	FBgn0032845	FBgn0033551	83935	8774	66231	59090
FBgn0000567	FBgn0003965	FBgn0032857	FBgn0033558	83733	112936	66233	59093
FBgn0013308	FBgn0033170	FBgn0032864	FBgn0033584	84288	95681	66235	59126
FBgn0037684	FBgn0000052	FBgn0032879	FBgn0033592	84217	57614	66236	59308
FBgn0010516	FBgn0259242	FBgn0032880	FBgn0033593	7546	51434	66237	60363
FBgn0029899	FBgn0010173	FBgn0032881	FBgn0033602	26166	116983	66241	60364
FBgn0044452	FBgn0030447	FBgn0032884	FBgn0033615	84267	122553	66242	60367
FBgn0039467	FBgn0041588	FBgn0032888	FBgn0033628	65056	163882	66244	60425
FBgn0041180	FBgn0032008	FBgn0032889	FBgn0033629	94015	440145	66251	60510
FBgn0016984	FBgn0020414	FBgn0032895	FBgn0033631	4166	388753	66253	60595
FBgn0028523	FBgn0039478	FBgn0032896	FBgn0033638	83894	4209	66254	60596
FBgn0051715	FBgn0021953	FBgn0032899	FBgn0033639	50808	7325	66256	63828
FBgn0036318	FBgn0051720	FBgn0032900	FBgn0033644	28514	151354	66257	63859
FBgn0035879	FBgn0032835	FBgn0032904	FBgn0033649	84059	122830	66268	63958
FBgn0037468	FBgn0085435	FBgn0032906	FBgn0033652	7099	81610	66270	63959
FBgn0037714	FBgn0029507	FBgn0032911	FBgn0033656	1073	114915	66272	63993
FBgn0053554	FBgn0028479	FBgn0032919	FBgn0033677	84698	113263	66290	64009
FBgn0033981	FBgn0262593	FBgn0032925	FBgn0033679	83879	84440	66294	64011
FBgn0002789	FBgn0032596	FBgn0032929	FBgn0033687	25934	30001	66306	64144
FBgn0083984	FBgn0000615	FBgn0032945	FBgn0033697	79038	51361	66307	64294
FBgn0259214	FBgn0030631	FBgn0032949	FBgn0033702	85016	221895	66308	64378
FBgn0024352	FBgn0000355	FBgn0032961	FBgn0033705	84314	25849	66310	64453
FBgn0010620	FBgn0033447	FBgn0032973	FBgn0033710	84527	10944	66333	64454
FBgn0035189	FBgn0037153	FBgn0032981	FBgn0033715	79877	84897	66343	64899
FBgn0004403	FBgn0001124	FBgn0032987	FBgn0033717	10335	7008	66349	64930
FBgn0038526	FBgn0033778	FBgn0032997	FBgn0033725	7077	113802	66366	65112
FBgn0031869	FBgn0031040	FBgn0033029	FBgn0033728	378938	56655	66369	65256
FBgn0005586	FBgn0033724	FBgn0033033	FBgn0033730	359948	57552	66379	65972
FBgn0021800	FBgn0085466	FBgn0033041	FBgn0033733	144348	126003	66383	66060
FBgn0027872	FBgn0028484	FBgn0033048	FBgn0033739	57153	261729	66387	66083
FBgn0040257	FBgn0039485	FBgn0033050	FBgn0033740	113201	28512	66390	66087
FBgn0061492	FBgn0053203	FBgn0033059	FBgn0033744	56262	163126	66391	66089
FBgn0000564	FBgn0033471	FBgn0033062	FBgn0033749	3998	317649	66401	66092
FBgn0037811	FBgn0036877	FBgn0033065	FBgn0033751	1979	84937	66406	66104
FBgn0013750	FBgn0260462	FBgn0033067	FBgn0033756	119504	164832	66411	66146
FBgn0010052	FBgn0031320	FBgn0033075	FBgn0033760	4301	79085	66413	66162
FBgn0039864	FBgn0261698	FBgn0033079	FBgn0033774	474170	961	66445	66164
FBgn0034401	FBgn0031764	FBgn0033081	FBgn0033775	54467	11320	66447	66165
FBgn0032077	FBgn0259714	FBgn0033086	FBgn0033778	84168	144165	66455	66202
FBgn0038761	FBgn0030102	FBgn0033089	FBgn0033782	54625	57586	66457	66205
FBgn0024807	FBgn0029639	FBgn0033100	FBgn0033783	27327	5581	66467	66211
FBgn0036169	FBgn0025366	FBgn0033101	FBgn0033787	83871	149175	66482	66220
FBgn0004687	FBgn0051202	FBgn0033115	FBgn0033792	123920	57455	66494	66222
FBgn0085360	FBgn0037885	FBgn0033121	FBgn0033793	55749	80144	66506	66225
FBgn0000183	FBgn0030576	FBgn0033133	FBgn0033799	92912	145567	66515	66234
FBgn0262993	FBgn0051718	FBgn0033138	FBgn0033802	6667	9066	66520	66240
FBgn0038833	FBgn0037684	FBgn0033153	FBgn0033809	10672	2932	66521	66259
FBgn0033872	FBgn0010516	FBgn0033162	FBgn0033814	57584	1040	66525	66262
FBgn0015795	FBgn0262870	FBgn0033169	FBgn0033817	89796	29094	66536	66264
FBgn0034860	FBgn0005614	FBgn0033170	FBgn0033819	84991	4649	66569	66266
FBgn0050344	FBgn0032393	FBgn0033189	FBgn0033820	283991	284252	66573	66292
FBgn0033775	FBgn0043470	FBgn0033204	FBgn0033821	25853	196394	66576	66297
FBgn0030289	FBgn0041180	FBgn0033205	FBgn0033826	7046	54536	66580	66300
FBgn0051414	FBgn0262026	FBgn0033214	FBgn0033827	57561	10087	66586	66323
FBgn0037070	FBgn0052425	FBgn0033215	FBgn0033830	9644	91057	66596	66350
FBgn0262517	FBgn0085399	FBgn0033226	FBgn0033834	2113	146923	66599	66354
FBgn0038076	FBgn0052600	FBgn0033232	FBgn0033835	58476	83857	66606	66355
FBgn0014018	FBgn0034888	FBgn0033235	FBgn0033836	57606	83855	66615	66385
FBgn0003890	FBgn0035591	FBgn0033241	FBgn0033844	84188	22853	66626	66388
FBgn0029791	FBgn0031692	FBgn0033244	FBgn0033845	57609	283070	66634	66395
FBgn0086408	FBgn0037714	FBgn0033246	FBgn0033846	84532	134429	66637	66400
FBgn0000212	FBgn0014469	FBgn0033247	FBgn0033853	200185	673	66642	66412
FBgn0052154	FBgn0002789	FBgn0033249	FBgn0033866	51479	79982	66645	66420
FBgn0069969	FBgn0083984	FBgn0033259	FBgn0033871	196527	57687	66648	66422
FBgn0083960	FBgn0035610	FBgn0033269	FBgn0033872	57580	55500	66653	66425
FBgn0001258	FBgn0030555	FBgn0033271	FBgn0033880	55727	114804	66658	66435
FBgn0029167	FBgn0001974	FBgn0033302	FBgn0033882	7112	528	66663	66443
FBgn0024314	FBgn0011225	FBgn0033317	FBgn0033885	7003	5058	66684	66461
FBgn0086910	FBgn0262569	FBgn0033321	FBgn0033889	57532	345778	66686	66469
FBgn0260475	FBgn0040582	FBgn0033342	FBgn0033890	4774	148252	66690	66500
FBgn0035538	FBgn0031461	FBgn0033347	FBgn0033902	56907	23092	66691	66503
FBgn0039774	FBgn0039609	FBgn0033356	FBgn0033913	147495	201161	66694	66511
FBgn0028473	FBgn0035189	FBgn0033357	FBgn0033915	6482	134111	66701	66514
FBgn0023388	FBgn0004403	FBgn0033366	FBgn0033917	54737	26225	66706	66528
FBgn0039612	FBgn0033906	FBgn0033367	FBgn0033926	57568	142678	66717	66538
FBgn0027586	FBgn0027334	FBgn0033373	FBgn0033928	57085	84866	66734	66548
FBgn0028396	FBgn0027093	FBgn0033374	FBgn0033929	5130	4139	66753	66549
FBgn0027279	FBgn0030768	FBgn0033377	FBgn0033932	1106	285343	66757	66561
FBgn0026393	FBgn0037239	FBgn0033378	FBgn0033945	55230	129607	66793	66578
FBgn0261555	FBgn0001168	FBgn0033379	FBgn0033958	3181	6092	66799	66587
FBgn0260764	FBgn0260639	FBgn0033387	FBgn0033963	143888	57544	66809	66593
FBgn0004575	FBgn0061492	FBgn0033388	FBgn0033968	221184	256586	66817	66612
FBgn0013278	FBgn0015575	FBgn0033395	FBgn0033969	51274	8038	66832	66622
FBgn0030073	FBgn0052418	FBgn0033403	FBgn0033970	4775	92255	66838	66628
FBgn0052865	FBgn0039023	FBgn0033422	FBgn0033978	6242	90990	66841	66641
FBgn0037822	FBgn0042094	FBgn0033438	FBgn0033982	2005	79817	66848	66673
FBgn0030816	FBgn0051191	FBgn0033439	FBgn0033988	4193	57504	66855	66687
FBgn0000448	FBgn0036181	FBgn0033450	FBgn0033998	93663	139818	66860	66700
FBgn0030574	FBgn0000056	FBgn0033458	FBgn0033999	4012	57633	66863	66705
FBgn0039060	FBgn0039864	FBgn0033464	FBgn0034005	151613	359845	66870	66711
FBgn0035317	FBgn0034401	FBgn0033465	FBgn0034025	22808	254887	66880	66713
FBgn0032834	FBgn0000047	FBgn0033466	FBgn0034049	65059	5903	66884	66714
FBgn0034069	FBgn0261602	FBgn0033467	FBgn0034053	5166	85403	66889	66725
FBgn0027565	FBgn0036948	FBgn0033468	FBgn0034060	4090	128434	66894	66766
FBgn0030409	FBgn0261815	FBgn0033485	FBgn0034067	6498	55972	66902	66779
FBgn0030403	FBgn0085360	FBgn0033515	FBgn0034069	124540	57168	66904	66808
FBgn0037487	FBgn0039431	FBgn0033518	FBgn0034072	151887	284273	66913	66818
FBgn0037930	FBgn0023514	FBgn0033519	FBgn0034073	91947	145173	66914	66821
FBgn0005322	FBgn0031874	FBgn0033520	FBgn0034075	5611	24145	66923	66826
FBgn0039203	FBgn0051721	FBgn0033521	FBgn0034083	85301	221710	66930	66849
FBgn0014455	FBgn0031294	FBgn0033524	FBgn0034091	85461	51123	66931	66864
FBgn0010352	FBgn0038675	FBgn0033543	FBgn0034094	114907	8573	66939	66865
FBgn0038002	FBgn0029897	FBgn0033544	FBgn0034110	714	79133	66940	66869
FBgn0035665	FBgn0029079	FBgn0033548	FBgn0034126	375035	440823	66945	66892
FBgn0003388	FBgn0033775	FBgn0033551	FBgn0034128	64115	114134	66950	66901
FBgn0027356	FBgn0033348	FBgn0033555	FBgn0034135	399959	348801	66952	66911
FBgn0051119	FBgn0030289	FBgn0033562	FBgn0034136	85440	57699	66960	66938
FBgn0011642	FBgn0051414	FBgn0033564	FBgn0034139	57045	112476	66965	66949
FBgn0039310	FBgn0038339	FBgn0033570	FBgn0034140	284996	7782	66967	66970
FBgn0260987	FBgn0037070	FBgn0033573	FBgn0034141	151636	84858	66978	66972
FBgn0033645	FBgn0034804	FBgn0033574	FBgn0034143	246184	3899	66979	66990
FBgn0263199	FBgn0039182	FBgn0033581	FBgn0034145	154810	4705	66995	66993
FBgn0262538	FBgn0051262	FBgn0033603	FBgn0034158	122786	146206	66997	66994
FBgn0051344	FBgn0014018	FBgn0033608	FBgn0034160	904	112609	67005	67010
FBgn0040091	FBgn0031505	FBgn0033624	FBgn0034162	81704	25791	67015	67016
FBgn0262573	FBgn0259241	FBgn0033635	FBgn0034179	6542	22979	67019	67027
FBgn0000592	FBgn0003890	FBgn0033657	FBgn0034184	151987	124359	67028	67035
FBgn0015789	FBgn0036640	FBgn0033663	FBgn0034187	118429	388962	67031	67042
FBgn0032262	FBgn0002780	FBgn0033667	FBgn0034194	4289	121457	67043	67064
FBgn0035624	FBgn0002571	FBgn0033683	FBgn0034199	26147	57801	67044	67111
FBgn0038721	FBgn0030037	FBgn0033686	FBgn0034200	113452	85300	67048	67119
FBgn0038530	FBgn0037475	FBgn0033691	FBgn0034229	64651	84326	67050	67122
FBgn0034194	FBgn0001258	FBgn0033699	FBgn0034230	29954	80777	67059	67128
FBgn0003345	FBgn0024314	FBgn0033716	FBgn0034232	22821	399474	67063	67131
FBgn0034329	FBgn0032911	FBgn0033724	FBgn0034258	255967	83891	67067	67136
FBgn0086911	FBgn0038312	FBgn0033725	FBgn0034261	1385	160851	67071	67144
FBgn0053207	FBgn0027074	FBgn0033729	FBgn0034266	254428	9185	67074	67148
FBgn0004107	FBgn0027564	FBgn0033735	FBgn0034275	130814	64409	67078	67161
FBgn0259977	FBgn0003479	FBgn0033740	FBgn0034276	152007	56899	67080	67181
FBgn0083962	FBgn0029881	FBgn0033741	FBgn0034282	10018	55082	67088	67205
FBgn0039709	FBgn0037890	FBgn0033742	FBgn0034289	84002	2043	67103	67210
FBgn0032955	FBgn0038467	FBgn0033748	FBgn0034290	122060	23025	67112	67213
FBgn0023001	FBgn0029663	FBgn0033755	FBgn0034291	6773	221545	67121	67230
FBgn0002921	FBgn0020545	FBgn0033761	FBgn0034293	150275	1636	67143	67231
FBgn0085793	FBgn0039612	FBgn0033763	FBgn0034295	26298	126129	67145	67235
FBgn0042135	FBgn0260753	FBgn0033769	FBgn0034296	29128	57531	67151	67236
FBgn0032447	FBgn0036208	FBgn0033774	FBgn0034312	91452	9926	67153	67245
FBgn0263198	FBgn0033482	FBgn0033775	FBgn0034323	84899	55103	67155	67252
FBgn0013686	FBgn0053229	FBgn0033777	FBgn0034325	23261	29922	67157	67263
FBgn0038130	FBgn0013307	FBgn0033782	FBgn0034326	90799	29078	67164	67266
FBgn0036875	FBgn0030073	FBgn0033785	FBgn0034329	151188	84896	67166	67278
FBgn0000363	FBgn0031209	FBgn0033799	FBgn0034346	59345	781	67170	67282
FBgn0034328	FBgn0034644	FBgn0033812	FBgn0034371	171024	5618	67178	67287
FBgn0013983	FBgn0001989	FBgn0033820	FBgn0034372	57475	282974	67188	67292
FBgn0032888	FBgn0036815	FBgn0033830	FBgn0034380	4194	146330	67196	67296
FBgn0053519	FBgn0010339	FBgn0033835	FBgn0034381	4040	140730	67198	67326
FBgn0034931	FBgn0039060	FBgn0033853	FBgn0034382	5939	57484	67201	67378
FBgn0032387	FBgn0034069	FBgn0033855	FBgn0034387	253827	25874	67203	67381
FBgn0031703	FBgn0263143	FBgn0033875	FBgn0034389	221035	219844	67226	67384
FBgn0030613	FBgn0035392	FBgn0033879	FBgn0034391	284702	118460	67246	67389
FBgn0004607	FBgn0031560	FBgn0033880	FBgn0034400	54893	57799	67249	67394
FBgn0259742	FBgn0030403	FBgn0033883	FBgn0034401	84952	260293	67254	67398
FBgn0062928	FBgn0034245	FBgn0033904	FBgn0034405	157638	57156	67261	67399
FBgn0039483	FBgn0005322	FBgn0033906	FBgn0034406	91107	1994	67264	67434
FBgn0037935	FBgn0031561	FBgn0033912	FBgn0034407	80255	85004	67286	67440
FBgn0037736	FBgn0045478	FBgn0033913	FBgn0034412	23095	347252	67288	67442
FBgn0025140	FBgn0033702	FBgn0033918	FBgn0034417	92667	2850	67298	67458
FBgn0030685	FBgn0014455	FBgn0033926	FBgn0034420	94241	9382	67313	67484
FBgn0260657	FBgn0031149	FBgn0033928	FBgn0034434	81617	388610	67325	67488
FBgn0027086	FBgn0035665	FBgn0033936	FBgn0034460	55729	414328	67329	67511
FBgn0052645	FBgn0037529	FBgn0033942	FBgn0034468	203228	1121	67330	67526
FBgn0039332	FBgn0003388	FBgn0033943	FBgn0034471	57674	90293	67338	67529
FBgn0037166	FBgn0015737	FBgn0033945	FBgn0034474	11228	5563	67344	67530
FBgn0085421	FBgn0027356	FBgn0033949	FBgn0034475	90007	85358	67356	67534
FBgn0033597	FBgn0015791	FBgn0033961	FBgn0034479	153222	84894	67370	67561
FBgn0013263	FBgn0035147	FBgn0033968	FBgn0034493	54510	64788	67371	67563
FBgn0031240	FBgn0033249	FBgn0033972	FBgn0034494	91653	23230	67382	67576
FBgn0051683	FBgn0020251	FBgn0033978	FBgn0034501	92597	170394	67392	67581
FBgn0086532	FBgn0034694	FBgn0033979	FBgn0034504	2549	114928	67397	67603
FBgn0034021	FBgn0031315	FBgn0033980	FBgn0034505	51088	387923	67405	67608
FBgn0029105	FBgn0031937	FBgn0033981	FBgn0034507	222166	401505	67412	67640
FBgn0263106	FBgn0263199	FBgn0033984	FBgn0034509	115209	222553	67414	67647
FBgn0004132	FBgn0262538	FBgn0033985	FBgn0034511	57216	266812	67416	67702
FBgn0033451	FBgn0000592	FBgn0034010	FBgn0034512	27106	343990	67419	67703
FBgn0034087	FBgn0032262	FBgn0034045	FBgn0034515	6850	91683	67422	67704
FBgn0020249	FBgn0045035	FBgn0034051	FBgn0034517	85464	320	67433	67712
FBgn0034166	FBgn0002607	FBgn0034054	FBgn0034530	22936	91584	67446	67724
FBgn0038909	FBgn0262160	FBgn0034058	FBgn0034532	55904	5924	67448	67728
FBgn0085465	FBgn0038721	FBgn0034061	FBgn0034534	54149	26090	67451	67731
FBgn0001978	FBgn0050418	FBgn0034067	FBgn0034540	375743	404217	67452	67732
FBgn0034293	FBgn0013995	FBgn0034070	FBgn0034542	57480	84448	67453	67752
FBgn0029525	FBgn0261975	FBgn0034076	FBgn0034582	463	29796	67456	67760
FBgn0067903	FBgn0015372	FBgn0034081	FBgn0034588	57494	196500	67459	67784
FBgn0032904	FBgn0027493	FBgn0034085	FBgn0034602	114793	111	67464	67792
FBgn0037999	FBgn0053207	FBgn0034087	FBgn0034603	7975	9530	67466	67800
FBgn0051469	FBgn0259977	FBgn0034089	FBgn0034605	2065	114815	67471	67803
FBgn0031801	FBgn0028642	FBgn0034098	FBgn0034612	4163	9951	67487	67815
FBgn0030272	FBgn0037676	FBgn0034110	FBgn0034618	1295	389362	67500	67846
FBgn0262515	FBgn0033999	FBgn0034117	FBgn0034638	57587	256714	67501	67848
FBgn0000395	FBgn0031897	FBgn0034126	FBgn0034639	10009	7088	67525	67850
FBgn0032322	FBgn0042129	FBgn0034138	FBgn0034647	79832	122402	67538	67855
FBgn0037796	FBgn0037625	FBgn0034141	FBgn0034655	663	138199	67542	67865
FBgn0010877	FBgn0027930	FBgn0034142	FBgn0034660	92737	53344	67553	67876
FBgn0050159	FBgn0031822	FBgn0034151	FBgn0034662	5784	91942	67557	67883
FBgn0003165	FBgn0030718	FBgn0034162	FBgn0034663	282809	57569	67564	67895
FBgn0036679	FBgn0031976	FBgn0034165	FBgn0034664	10114	91298	67568	67916
FBgn0019972	FBgn0038519	FBgn0034166	FBgn0034692	116843	3778	67569	67923
FBgn0039543	FBgn0013686	FBgn0034181	FBgn0034693	126393	375323	67588	67935
FBgn0259233	FBgn0033820	FBgn0034187	FBgn0034706	221491	157574	67590	67952
FBgn0030331	FBgn0034943	FBgn0034191	FBgn0034707	253260	9218	67602	67963
FBgn0051643	FBgn0036875	FBgn0034195	FBgn0034709	84333	125058	67606	67972
FBgn0037263	FBgn0261243	FBgn0034198	FBgn0034716	129531	27330	67610	68024
FBgn0038878	FBgn0086697	FBgn0034199	FBgn0034717	3570	80309	67620	68028
FBgn0050062	FBgn0052475	FBgn0034201	FBgn0034718	92344	160518	67623	68032
FBgn0031906	FBgn0032018	FBgn0034215	FBgn0034720	6711	3786	67629	68036
FBgn0000075	FBgn0000363	FBgn0034219	FBgn0034723	84460	57575	67661	68051
FBgn0039102	FBgn0036549	FBgn0034221	FBgn0034733	84888	389432	67665	68070
FBgn0040022	FBgn0034974	FBgn0034225	FBgn0034735	3092	5874	67667	68082
FBgn0029970	FBgn0000206	FBgn0034229	FBgn0034736	4782	170261	67676	68094
FBgn0027101	FBgn0031970	FBgn0034237	FBgn0034741	11099	7068	67678	68118
FBgn0030484	FBgn0016926	FBgn0034243	FBgn0034748	113612	2977	67684	68121
FBgn0035725	FBgn0051777	FBgn0034245	FBgn0034755	85315	7336	67694	68142
FBgn0031734	FBgn0040340	FBgn0034246	FBgn0034756	828	54557	67698	68144
FBgn0040972	FBgn0261808	FBgn0034247	FBgn0034758	768211	83482	67708	68147
FBgn0261804	FBgn0261929	FBgn0034249	FBgn0034759	89932	131034	67725	68149
FBgn0028622	FBgn0031703	FBgn0034253	FBgn0034786	6641	9498	67738	68153
FBgn0035153	FBgn0035679	FBgn0034258	FBgn0034793	10746	5165	67749	68173
FBgn0036448	FBgn0262737	FBgn0034262	FBgn0034796	55502	339487	67763	68178
FBgn0036712	FBgn0062928	FBgn0034267	FBgn0034797	205428	51571	67769	68202
FBgn0033464	FBgn0262619	FBgn0034276	FBgn0034808	57224	151126	67771	68203
FBgn0030052	FBgn0053288	FBgn0034277	FBgn0034817	63929	196294	67772	68212
FBgn0026630	FBgn0025140	FBgn0034290	FBgn0034849	25938	9671	67776	68232
FBgn0038279	FBgn0260657	FBgn0034312	FBgn0034887	84458	148641	67785	68240
FBgn0039016	FBgn0027086	FBgn0034315	FBgn0034888	63915	152330	67790	68285
FBgn0014075	FBgn0037166	FBgn0034321	FBgn0034889	135228	23765	67797	68337
FBgn0028360	FBgn0030985	FBgn0034322	FBgn0034897	83648	25769	67804	68339
FBgn0031126	FBgn0034512	FBgn0034325	FBgn0034909	9180	79057	67808	68342
FBgn0261625	FBgn0053523	FBgn0034328	FBgn0034918	91526	56704	67811	68349
FBgn0037936	FBgn0086532	FBgn0034329	FBgn0034920	10491	6904	67812	68350
FBgn0038115	FBgn0034432	FBgn0034330	FBgn0034938	25925	80003	67826	68420
FBgn0032515	FBgn0039859	FBgn0034331	FBgn0034948	64376	340554	67834	68428
FBgn0026869	FBgn0034588	FBgn0034335	FBgn0034950	112574	22874	67844	68477
FBgn0038645	FBgn0015038	FBgn0034345	FBgn0034964	117	148808	67851	68493
FBgn0085446	FBgn0037439	FBgn0034350	FBgn0034966	5396	283209	67857	68507
FBgn0034964	FBgn0034087	FBgn0034354	FBgn0034972	3344	57692	67859	68519
FBgn0261872	FBgn0027111	FBgn0034356	FBgn0034974	152137	2045	67862	68524
FBgn0263257	FBgn0034808	FBgn0034363	FBgn0034985	376497	115827	67863	68526
FBgn0003463	FBgn0027091	FBgn0034364	FBgn0034997	254225	130733	67864	68539
FBgn0036121	FBgn0029525	FBgn0034365	FBgn0034999	143684	153	67871	68553
FBgn0033135	FBgn0032904	FBgn0034366	FBgn0035023	168455	114818	67872	68559
FBgn0023529	FBgn0033562	FBgn0034368	FBgn0035041	3433	127845	67873	68566
FBgn0035811	FBgn0037999	FBgn0034390	FBgn0035043	91404	146713	67874	68567
FBgn0020908	FBgn0001263	FBgn0034392	FBgn0035049	387758	139728	67878	68585
FBgn0085433	FBgn0034576	FBgn0034394	FBgn0035059	85007	55294	67881	68591
FBgn0045501	FBgn0086708	FBgn0034396	FBgn0035076	64853	9774	67884	68592
FBgn0051676	FBgn0031801	FBgn0034398	FBgn0035087	643641	285172	67887	68597
FBgn0034290	FBgn0039233	FBgn0034401	FBgn0035090	56999	257194	67902	68598
FBgn0050296	FBgn0032322	FBgn0034405	FBgn0035091	65979	4915	67903	68606
FBgn0033177	FBgn0039778	FBgn0034408	FBgn0035092	254295	138639	67917	68614
FBgn0262577	FBgn0034398	FBgn0034430	FBgn0035094	55589	57578	67922	68617
FBgn0026056	FBgn0032138	FBgn0034432	FBgn0035099	57546	120892	67937	68644
FBgn0041183	FBgn0052103	FBgn0034436	FBgn0035101	114799	131474	67943	68652
FBgn0035959	FBgn0020906	FBgn0034437	FBgn0035103	283464	8874	67948	68653
FBgn0004569	FBgn0052057	FBgn0034438	FBgn0035106	5990	124925	67951	68655
FBgn0003507	FBgn0036679	FBgn0034439	FBgn0035112	84329	55275	67955	68659
FBgn0046302	FBgn0262782	FBgn0034440	FBgn0035113	219699	266722	67978	68691
FBgn0030719	FBgn0040309	FBgn0034443	FBgn0035131	30812	374383	67979	68693
FBgn0039805	FBgn0004397	FBgn0034451	FBgn0035132	29945	145853	67988	68718
FBgn0003676	FBgn0023095	FBgn0034454	FBgn0035137	133686	144423	67993	68728
FBgn0024806	FBgn0034683	FBgn0034468	FBgn0035142	79074	653308	67994	68738
FBgn0262533	FBgn0003651	FBgn0034470	FBgn0035144	8897	5463	67996	68744
FBgn0260945	FBgn0044050	FBgn0034471	FBgn0035145	360023	55530	68001	68750
FBgn0038243	FBgn0038878	FBgn0034474	FBgn0035151	201627	29780	68014	68767
FBgn0262565	FBgn0040387	FBgn0034475	FBgn0035158	9364	79109	68015	68770
FBgn0033093	FBgn0015570	FBgn0034479	FBgn0035162	65124	644150	68021	68775
FBgn0011260	FBgn0039102	FBgn0034480	FBgn0035164	201266	80863	68033	68778
FBgn0003386	FBgn0034060	FBgn0034485	FBgn0035167	284217	2324	68034	68801
FBgn0000594	FBgn0035725	FBgn0034487	FBgn0035169	91369	374887	68045	68810
FBgn0050080	FBgn0027535	FBgn0034488	FBgn0035171	79848	340542	68047	68815
FBgn0013684	FBgn0263006	FBgn0034490	FBgn0035173	57519	127254	68055	68817
FBgn0033929	FBgn0260660	FBgn0034494	FBgn0035178	22879	729993	68066	68818
FBgn0038422	FBgn0028424	FBgn0034500	FBgn0035186	84343	258010	68067	68832
FBgn0031117	FBgn0263120	FBgn0034505	FBgn0035203	4520	130507	68080	68837
FBgn0010387	FBgn0039896	FBgn0034506	FBgn0035204	6426	90161	68087	68854
FBgn0035484	FBgn0035638	FBgn0034509	FBgn0035205	283349	6453	68090	68888
FBgn0033032	FBgn0035999	FBgn0034511	FBgn0035207	79993	94081	68098	68910
FBgn0051481	FBgn0030672	FBgn0034512	FBgn0035210	59271	254263	68099	68918
FBgn0026418	FBgn0041194	FBgn0034515	FBgn0035231	26084	116442	68107	68939
FBgn0015568	FBgn0020930	FBgn0034517	FBgn0035236	6872	83394	68117	68953
FBgn0030086	FBgn0250867	FBgn0034527	FBgn0035241	57713	27115	68126	68966
FBgn0035720	FBgn0024957	FBgn0034528	FBgn0035253	84668	57574	68127	68977
FBgn0003162	FBgn0027607	FBgn0034538	FBgn0035258	5451	222008	68128	68991
FBgn0023214	FBgn0026630	FBgn0034543	FBgn0035262	6884	51322	68133	69010
FBgn0260859	FBgn0024332	FBgn0034576	FBgn0035264	90321	283417	68137	69017
FBgn0040284	FBgn0039016	FBgn0034577	FBgn0035265	55432	285812	68146	69032
FBgn0036520	FBgn0028360	FBgn0034583	FBgn0035270	3673	157807	68170	69046
FBgn0024987	FBgn0002579	FBgn0034598	FBgn0035282	159195	285175	68177	69072
FBgn0038810	FBgn0031126	FBgn0034602	FBgn0035287	2737	134548	68183	69076
FBgn0029093	FBgn0032405	FBgn0034612	FBgn0035290	727820	9480	68190	69085
FBgn0036992	FBgn0038115	FBgn0034618	FBgn0035293	4784	114088	68197	69091
FBgn0259168	FBgn0260965	FBgn0034622	FBgn0035328	53342	129049	68209	69113
FBgn0083977	FBgn0085482	FBgn0034628	FBgn0035346	202018	153364	68235	69121
FBgn0037939	FBgn0034964	FBgn0034629	FBgn0035347	54996	5686	68251	69171
FBgn0037643	FBgn0035811	FBgn0034641	FBgn0035357	6654	132204	68259	69189
FBgn0035868	FBgn0036337	FBgn0034645	FBgn0035358	56957	84553	68262	69190
FBgn0033438	FBgn0020908	FBgn0034646	FBgn0035360	85439	387914	68263	69191
FBgn0034484	FBgn0262599	FBgn0034654	FBgn0035371	55553	60680	68271	69202
FBgn0033760	FBgn0034179	FBgn0034656	FBgn0035382	220963	3746	68272	69219
FBgn0039904	FBgn0085484	FBgn0034670	FBgn0035385	162073	283455	68273	69225
FBgn0013981	FBgn0005585	FBgn0034674	FBgn0035392	51104	29091	68275	69259
FBgn0051998	FBgn0061362	FBgn0034687	FBgn0035399	124491	9481	68277	69274
FBgn0033133	FBgn0034290	FBgn0034688	FBgn0035400	729614	145581	68294	69281
FBgn0260993	FBgn0051145	FBgn0034697	FBgn0035416	284695	56256	68304	69287
FBgn0027594	FBgn0004167	FBgn0034705	FBgn0035423	2770	139065	68323	69299
FBgn0259990	FBgn0003507	FBgn0034717	FBgn0035431	94121	112755	68347	69320
FBgn0030300	FBgn0005636	FBgn0034724	FBgn0035432	389337	79750	68355	69338
FBgn0020240	FBgn0262880	FBgn0034725	FBgn0035439	4093	3736	68375	69352
FBgn0036016	FBgn0036763	FBgn0034728	FBgn0035445	127933	169834	68401	69367
FBgn0029737	FBgn0037616	FBgn0034729	FBgn0035476	54102	285987	68423	69368
FBgn0036896	FBgn0025680	FBgn0034730	FBgn0035477	494115	55819	68436	69430
FBgn0034655	FBgn0260945	FBgn0034733	FBgn0035484	285195	400745	68440	69454
FBgn0034365	FBgn0038466	FBgn0034741	FBgn0035490	4086	654466	68441	69479
FBgn0029893	FBgn0052132	FBgn0034753	FBgn0035495	286827	58512	68458	69480
FBgn0020618	FBgn0033093	FBgn0034756	FBgn0035497	163175	151556	68480	69482
FBgn0036505	FBgn0028888	FBgn0034761	FBgn0035498	114785	221336	68510	69524
FBgn0053349	FBgn0039073	FBgn0034786	FBgn0035499	57722	64478	68525	69528
FBgn0016715	FBgn0086443	FBgn0034797	FBgn0035500	54947	1734	68531	69534
FBgn0030347	FBgn0052628	FBgn0034804	FBgn0035512	54891	116988	68537	69536
FBgn0028527	FBgn0010926	FBgn0034858	FBgn0035515	121512	340146	68544	69556
FBgn0260995	FBgn0000594	FBgn0034860	FBgn0035523	116154	59283	68549	69564
FBgn0035100	FBgn0027330	FBgn0034861	FBgn0035538	122416	163404	68556	69596
FBgn0027539	FBgn0020762	FBgn0034870	FBgn0035539	347862	80228	68558	69601
FBgn0004362	FBgn0033367	FBgn0034885	FBgn0035544	54756	1128	68565	69635
FBgn0032637	FBgn0033929	FBgn0034887	FBgn0035557	387119	9241	68603	69640
FBgn0052255	FBgn0031117	FBgn0034888	FBgn0035563	132949	56243	68618	69655
FBgn0016930	FBgn0010387	FBgn0034902	FBgn0035574	65975	57451	68628	69656
FBgn0039620	FBgn0035484	FBgn0034914	FBgn0035575	128344	57464	68636	69671
FBgn0019650	FBgn0261984	FBgn0034915	FBgn0035578	151742	4842	68666	69675
FBgn0030343	FBgn0027590	FBgn0034920	FBgn0035583	255488	200958	68667	69681
FBgn0051792	FBgn0050497	FBgn0034935	FBgn0035587	115825	651746	68675	69684
FBgn0040475	FBgn0032144	FBgn0034943	FBgn0035589	2778	51105	68708	69709
FBgn0028990	FBgn0036728	FBgn0034967	FBgn0035610	1903	220164	68709	69721
FBgn0022764	FBgn0015568	FBgn0034971	FBgn0035612	84281	23345	68737	69726
FBgn0038236	FBgn0003162	FBgn0034974	FBgn0035619	729234	203274	68743	69732
FBgn0037709	FBgn0051898	FBgn0034986	FBgn0035620	84614	64881	68755	69737
FBgn0262740	FBgn0023214	FBgn0035020	FBgn0035623	115548	5289	68764	69770
FBgn0069354	FBgn0039611	FBgn0035022	FBgn0035625	126969	83992	68777	69780
FBgn0014869	FBgn0037882	FBgn0035024	FBgn0035627	96459	57562	68789	69786
FBgn0034067	FBgn0085346	FBgn0035032	FBgn0035636	80817	133522	68794	69792
FBgn0020765	FBgn0259182	FBgn0035044	FBgn0035656	5010	286272	68795	69812
FBgn0003517	FBgn0032840	FBgn0035046	FBgn0035665	120376	57512	68799	69814
FBgn0036834	FBgn0033889	FBgn0035049	FBgn0035667	131870	57611	68816	69815
FBgn0031362	FBgn0035432	FBgn0035063	FBgn0035670	158405	57689	68833	69847
FBgn0016131	FBgn0263177	FBgn0035065	FBgn0035673	27314	54511	68841	69863
FBgn0033649	FBgn0036992	FBgn0035076	FBgn0035674	55900	767579	68842	69893
FBgn0038818	FBgn0032264	FBgn0035078	FBgn0035688	5592	30010	68845	69903
FBgn0039560	FBgn0037443	FBgn0035082	FBgn0035695	117583	85443	68846	69918
FBgn0037705	FBgn0259168	FBgn0035084	FBgn0035696	8905	3788	68861	69938
FBgn0026076	FBgn0014417	FBgn0035089	FBgn0035715	153579	56986	68867	69994
FBgn0031759	FBgn0036056	FBgn0035090	FBgn0035718	144100	84189	68920	70021
FBgn0036844	FBgn0037643	FBgn0035091	FBgn0035720	51616	285513	68927	70044
FBgn0027528	FBgn0001128	FBgn0035092	FBgn0035734	117248	284615	68942	70059
FBgn0035710	FBgn0000039	FBgn0035107	FBgn0035755	128346	57718	68949	70061
FBgn0250876	FBgn0032338	FBgn0035120	FBgn0035756	55349	84033	68952	70209
FBgn0035632	FBgn0030558	FBgn0035121	FBgn0035767	65986	84631	68955	70237
FBgn0038789	FBgn0038082	FBgn0035146	FBgn0035769	8139	25953	68964	70240
FBgn0020764	FBgn0033133	FBgn0035147	FBgn0035770	160335	57528	68968	70333
FBgn0025643	FBgn0038589	FBgn0035150	FBgn0035771	3766	55342	68969	70335
FBgn0038294	FBgn0033101	FBgn0035152	FBgn0035779	57628	64168	68971	70351
FBgn0031879	FBgn0028380	FBgn0035160	FBgn0035781	165324	84867	68972	70356
FBgn0086450	FBgn0063485	FBgn0035165	FBgn0035799	7011	388135	68979	70369
FBgn0039959	FBgn0038344	FBgn0035181	FBgn0035806	115330	57554	68988	70375
FBgn0033139	FBgn0027594	FBgn0035186	FBgn0035816	10052	60684	68992	70377
FBgn0035806	FBgn0261436	FBgn0035187	FBgn0035817	5455	84856	69035	70415
FBgn0032252	FBgn0000459	FBgn0035189	FBgn0035825	443	1946	69064	70427
FBgn0000057	FBgn0038617	FBgn0035193	FBgn0035870	9759	8618	69065	70430
FBgn0027525	FBgn0030853	FBgn0035194	FBgn0035877	6815	160	69073	70435
FBgn0263102	FBgn0261388	FBgn0035213	FBgn0035880	84307	54329	69089	70450
FBgn0051933	FBgn0051778	FBgn0035228	FBgn0035891	342926	57186	69094	70472
FBgn0262904	FBgn0031936	FBgn0035232	FBgn0035896	117584	114805	69101	70527
FBgn0037230	FBgn0020618	FBgn0035233	FBgn0035904	80306	2935	69106	70556
FBgn0051235	FBgn0036749	FBgn0035238	FBgn0035914	84688	8766	69109	70564
FBgn0001311	FBgn0020513	FBgn0035240	FBgn0035917	84939	221662	69136	70579
FBgn0261800	FBgn0016122	FBgn0035243	FBgn0035926	10165	55212	69150	70617
FBgn0259711	FBgn0023174	FBgn0035246	FBgn0035934	81624	6875	69156	70638
FBgn0014026	FBgn0039748	FBgn0035251	FBgn0035948	118491	79716	69159	70645
FBgn0031821	FBgn0016715	FBgn0035252	FBgn0035953	283659	4134	69179	70661
FBgn0032900	FBgn0038132	FBgn0035258	FBgn0035956	79611	161742	69195	70713
FBgn0014092	FBgn0013955	FBgn0035266	FBgn0035959	400242	157285	69207	70727
FBgn0027783	FBgn0038105	FBgn0035268	FBgn0035966	80318	8622	69215	70747
FBgn0045823	FBgn0061361	FBgn0035280	FBgn0035967	132671	11346	69221	70750
FBgn0039411	FBgn0016930	FBgn0035286	FBgn0035968	64710	143686	69228	70757
FBgn0038532	FBgn0032453	FBgn0035287	FBgn0035969	728855	93986	69234	70769
FBgn0040532	FBgn0028853	FBgn0035290	FBgn0035976	169792	134957	69263	70802
FBgn0002590	FBgn0034013	FBgn0035293	FBgn0035977	162681	257068	69291	70804
FBgn0035815	FBgn0039359	FBgn0035298	FBgn0035981	1018	5810	69309	70839
FBgn0037934	FBgn0037709	FBgn0035300	FBgn0035983	348094	140733	69310	70843
FBgn0040262	FBgn0031464	FBgn0035308	FBgn0035985	441027	56648	69315	70930
FBgn0032382	FBgn0014869	FBgn0035309	FBgn0035999	9589	139341	69329	70960
FBgn0010549	FBgn0085390	FBgn0035331	FBgn0036004	55717	148014	69372	70993
FBgn0039255	FBgn0027950	FBgn0035334	FBgn0036007	148203	137392	69399	70999
FBgn0033667	FBgn0003517	FBgn0035337	FBgn0036016	57506	246330	69441	71003
FBgn0085364	FBgn0031362	FBgn0035338	FBgn0036017	727764	91608	69478	71007
FBgn0027341	FBgn0016131	FBgn0035344	FBgn0036024	80763	643837	69522	71033
FBgn0033476	FBgn0033918	FBgn0035348	FBgn0036035	9201	137682	69547	71045
FBgn0027329	FBgn0010198	FBgn0035355	FBgn0036038	79819	9229	69548	71063
FBgn0027259	FBgn0035588	FBgn0035356	FBgn0036039	57507	150763	69554	71086
FBgn0011674	FBgn0040571	FBgn0035357	FBgn0036043	118738	11154	69572	71093
FBgn0039479	FBgn0052698	FBgn0035359	FBgn0036046	402573	161253	69606	71096
FBgn0034885	FBgn0038818	FBgn0035374	FBgn0036053	10206	8034	69617	71101
FBgn0010197	FBgn0259989	FBgn0035375	FBgn0036056	167691	153769	69642	71137
FBgn0036588	FBgn0034439	FBgn0035379	FBgn0036080	658	774	69654	71159
FBgn0020642	FBgn0261509	FBgn0035383	FBgn0036101	254956	222183	69662	71161
FBgn0036454	FBgn0261843	FBgn0035398	FBgn0036106	29899	79718	69672	71183
FBgn0036991	FBgn0011224	FBgn0035402	FBgn0036115	6900	221424	69674	71186
FBgn0031688	FBgn0034500	FBgn0035422	FBgn0036116	220108	777	69693	71226
FBgn0026319	FBgn0035519	FBgn0035425	FBgn0036144	54532	6605	69697	71240
FBgn0038735	FBgn0031039	FBgn0035427	FBgn0036145	285268	2823	69700	71265
FBgn0037942	FBgn0038968	FBgn0035434	FBgn0036146	79725	120114	69702	71268
FBgn0035911	FBgn0020764	FBgn0035436	FBgn0036169	221078	7482	69707	71275
FBgn0037680	FBgn0025643	FBgn0035438	FBgn0036183	80005	7094	69724	71306
FBgn0032810	FBgn0038516	FBgn0035439	FBgn0036191	1739	285147	69727	71326
FBgn0032770	FBgn0086450	FBgn0035440	FBgn0036194	389084	117247	69731	71436
FBgn0032076	FBgn0052085	FBgn0035444	FBgn0036196	55119	23284	69739	71445
FBgn0036709	FBgn0033139	FBgn0035452	FBgn0036199	283481	10075	69747	71446
FBgn0000042	FBgn0028582	FBgn0035461	FBgn0036205	56994	285550	69748	71461
FBgn0033313	FBgn0034081	FBgn0035468	FBgn0036208	5991	8999	69784	71529
FBgn0039955	FBgn0035806	FBgn0035471	FBgn0036211	954	6330	69790	71667
FBgn0038865	FBgn0000057	FBgn0035473	FBgn0036240	219287	121256	69804	71685
FBgn0031939	FBgn0039667	FBgn0035476	FBgn0036257	399694	81832	69806	71704
FBgn0034075	FBgn0037230	FBgn0035480	FBgn0036259	90506	90249	69807	71712
FBgn0025620	FBgn0037015	FBgn0035484	FBgn0036271	257019	285533	69823	71713
FBgn0032402	FBgn0011705	FBgn0035499	FBgn0036278	221687	114795	69870	71715
FBgn0036015	FBgn0035046	FBgn0035501	FBgn0036279	128153	285556	69871	71720
FBgn0017558	FBgn0025683	FBgn0035504	FBgn0036282	389765	399947	69882	71722
FBgn0034647	FBgn0030261	FBgn0035510	FBgn0036287	4036	63934	69890	71724
FBgn0000320	FBgn0040384	FBgn0035515	FBgn0036288	167410	390205	69894	71729
FBgn0020386	FBgn0008635	FBgn0035518	FBgn0036289	23250	256130	69900	71742
FBgn0038387	FBgn0014026	FBgn0035521	FBgn0036290	54518	375612	69923	71753
FBgn0053080	FBgn0054008	FBgn0035523	FBgn0036294	28999	134701	69928	71755
FBgn0002413	FBgn0035815	FBgn0035524	FBgn0036301	146802	646113	69930	71764
FBgn0032394	FBgn0052206	FBgn0035529	FBgn0036302	257177	646658	69952	71770
FBgn0051675	FBgn0015781	FBgn0035539	FBgn0036321	80217	284485	69957	71775
FBgn0260635	FBgn0030878	FBgn0035541	FBgn0036333	90050	401190	69976	71780
FBgn0038261	FBgn0051102	FBgn0035544	FBgn0036351	148741	641467	69981	71791
FBgn0033978	FBgn0035909	FBgn0035574	FBgn0036354	286207	114786	70025	71799
FBgn0015011	FBgn0034674	FBgn0035575	FBgn0036364	117283	145447	70052	71801
FBgn0031643	FBgn0029762	FBgn0035583	FBgn0036367	23566	285016	70099	71820
FBgn0010015	FBgn0037492	FBgn0035588	FBgn0036368	64147	151473	70103	71833
FBgn0052121	FBgn0014849	FBgn0035589	FBgn0036376	83876	821	70120	71836
FBgn0029990	FBgn0032382	FBgn0035592	FBgn0036380	220382	729956	70123	71839
FBgn0000044	FBgn0010611	FBgn0035600	FBgn0036381	255119	222865	70129	71864
FBgn0028658	FBgn0039255	FBgn0035607	FBgn0036391	8693	286097	70144	71878
FBgn0004867	FBgn0032538	FBgn0035619	FBgn0036402	7756	23635	70153	71901
FBgn0051195	FBgn0030945	FBgn0035620	FBgn0036405	51068	2794	70160	71907
FBgn0034180	FBgn0034724	FBgn0035623	FBgn0036417	81844	55809	70223	71912
FBgn0005561	FBgn0030976	FBgn0035630	FBgn0036419	27143	130367	70225	71927
FBgn0031466	FBgn0085407	FBgn0035632	FBgn0036422	347689	79703	70233	71943
FBgn0261619	FBgn0261642	FBgn0035639	FBgn0036428	85463	152789	70235	71947
FBgn0020660	FBgn0000326	FBgn0035642	FBgn0036433	57471	8715	70239	71952
FBgn0053965	FBgn0038011	FBgn0035656	FBgn0036461	22807	775	70247	71972
FBgn0038337	FBgn0033476	FBgn0035676	FBgn0036463	667	401474	70248	71978
FBgn0259174	FBgn0038196	FBgn0035679	FBgn0036479	388969	284161	70261	71997
FBgn0004873	FBgn0262096	FBgn0035692	FBgn0036486	83481	8526	70266	72002
FBgn0262714	FBgn0035693	FBgn0035707	FBgn0036498	4728	399668	70296	72003
FBgn0035227	FBgn0052284	FBgn0035715	FBgn0036502	375513	440934	70300	72029
FBgn0038638	FBgn0039479	FBgn0035724	FBgn0036511	5648	282996	70310	72047
FBgn0261560	FBgn0034885	FBgn0035725	FBgn0036518	90271	143098	70315	72055
FBgn0034903	FBgn0010197	FBgn0035726	FBgn0036519	860	64743	70316	72075
FBgn0035985	FBgn0031066	FBgn0035734	FBgn0036544	8621	288	70317	72097
FBgn0086359	FBgn0031775	FBgn0035753	FBgn0036547	1767	347730	70325	72102
FBgn0051211	FBgn0262366	FBgn0035763	FBgn0036549	85445	338758	70349	72113
FBgn0033058	FBgn0083971	FBgn0035772	FBgn0036550	63976	1630	70350	72114
FBgn0003292	FBgn0027608	FBgn0035780	FBgn0036551	2908	2904	70380	72139
FBgn0054003	FBgn0024183	FBgn0035789	FBgn0036553	54482	3737	70423	72147
FBgn0010406	FBgn0015816	FBgn0035791	FBgn0036556	57186	1349	70428	72151
FBgn0010812	FBgn0035186	FBgn0035811	FBgn0036557	84466	55653	70439	72157
FBgn0260049	FBgn0035911	FBgn0035816	FBgn0036560	5337	140767	70441	72170
FBgn0028872	FBgn0032770	FBgn0035830	FBgn0036566	196047	1750	70448	72190
FBgn0035398	FBgn0032076	FBgn0035831	FBgn0036576	84334	94030	70456	72195
FBgn0036106	FBgn0031436	FBgn0035848	FBgn0036579	644139	645513	70458	72289
FBgn0051390	FBgn0020303	FBgn0035850	FBgn0036584	92565	253152	70478	72315
FBgn0027348	FBgn0052441	FBgn0035860	FBgn0036585	22839	117154	70487	72324
FBgn0062961	FBgn0038865	FBgn0035871	FBgn0036595	3760	22849	70495	72338
FBgn0039319	FBgn0015577	FBgn0035876	FBgn0036597	55592	386618	70508	72344
FBgn0034381	FBgn0032001	FBgn0035877	FBgn0036619	7769	201780	70530	72354
FBgn0003515	FBgn0031939	FBgn0035888	FBgn0036620	55755	10317	70546	72355
FBgn0036003	FBgn0032402	FBgn0035895	FBgn0036622	728061	389895	70551	72397
FBgn0038063	FBgn0033557	FBgn0035906	FBgn0036623	26046	222537	70572	72401
FBgn0004895	FBgn0034788	FBgn0035907	FBgn0036627	319085	140679	70573	72462
FBgn0030349	FBgn0034647	FBgn0035911	FBgn0036646	57486	391267	70575	72475
FBgn0032886	FBgn0053080	FBgn0035915	FBgn0036648	80314	654790	70584	72500
FBgn0020493	FBgn0025286	FBgn0035921	FBgn0036661	134147	149297	70591	72503
FBgn0032940	FBgn0038974	FBgn0035934	FBgn0036663	121441	55759	70616	72507
FBgn0031260	FBgn0029148	FBgn0035947	FBgn0036668	143458	51101	70650	72522
FBgn0041582	FBgn0032394	FBgn0035948	FBgn0036684	25939	389073	70652	72552
FBgn0052091	FBgn0028433	FBgn0035952	FBgn0036687	1368	94122	70675	72555
FBgn0039415	FBgn0036686	FBgn0035964	FBgn0036697	152926	25994	70676	72556
FBgn0052499	FBgn0035480	FBgn0035969	FBgn0036702	63971	2561	70683	72572
FBgn0259143	FBgn0004436	FBgn0035975	FBgn0036714	254128	84634	70686	72612
FBgn0005660	FBgn0005278	FBgn0035978	FBgn0036731	57458	283554	70693	72615
FBgn0262167	FBgn0011754	FBgn0035981	FBgn0036732	8844	1977	70729	72634
FBgn0003660	FBgn0035977	FBgn0035982	FBgn0036735	133015	165215	70762	72654
FBgn0002567	FBgn0033942	FBgn0035995	FBgn0036738	1326	374986	70791	72699
FBgn0034618	FBgn0043535	FBgn0035996	FBgn0036741	27031	23072	70799	72739
FBgn0032451	FBgn0004644	FBgn0036007	FBgn0036742	84441	55250	70808	72775
FBgn0262736	FBgn0019932	FBgn0036008	FBgn0036745	344595	125113	70827	72792
FBgn0030234	FBgn0259179	FBgn0036015	FBgn0036750	5229	345630	70834	72795
FBgn0036777	FBgn0030177	FBgn0036016	FBgn0036752	84874	340533	70885	72821
FBgn0050499	FBgn0031497	FBgn0036020	FBgn0036756	51433	3765	70911	72843
FBgn0086676	FBgn0029990	FBgn0036022	FBgn0036764	196051	148281	70918	72844
FBgn0029117	FBgn0052553	FBgn0036030	FBgn0036765	133690	404672	70951	72895
FBgn0046875	FBgn0033310	FBgn0036046	FBgn0036767	5137	253650	70974	72898
FBgn0037583	FBgn0038381	FBgn0036080	FBgn0036770	29119	56479	70976	72899
FBgn0031883	FBgn0033366	FBgn0036094	FBgn0036777	3996	51729	70998	72902
FBgn0001941	FBgn0052392	FBgn0036101	FBgn0036778	23111	85397	71041	72948
FBgn0034817	FBgn0004841	FBgn0036106	FBgn0036787	6232	64641	71059	72949
FBgn0030745	FBgn0004867	FBgn0036121	FBgn0036790	127795		71091	72982
FBgn0000071	FBgn0038869	FBgn0036125	FBgn0036795	165186		71116	73001
FBgn0039347	FBgn0039858	FBgn0036126	FBgn0036801	150622		71151	73024
FBgn0039099	FBgn0063491	FBgn0036134	FBgn0036813	26127		71153	73068
FBgn0039562	FBgn0053993	FBgn0036136	FBgn0036816	221442		71166	73075
FBgn0052029	FBgn0037521	FBgn0036141	FBgn0036821	57120		71175	73086
FBgn0011296	FBgn0023508	FBgn0036145	FBgn0036831	129881		71176	73094
FBgn0263289	FBgn0052700	FBgn0036147	FBgn0036834	151827		71198	73100
FBgn0260442	FBgn0040493	FBgn0036157	FBgn0036837	25852		71207	73102
FBgn0019644	FBgn0036754	FBgn0036170	FBgn0036839	341676		71213	73162
FBgn0025456	FBgn0040606	FBgn0036186	FBgn0036843	158798		71223	73218
FBgn0030028	FBgn0003178	FBgn0036187	FBgn0036844	64399		71228	73233
FBgn0000667	FBgn0033351	FBgn0036188	FBgn0036847	285800		71233	73284
FBgn0030799	FBgn0035252	FBgn0036193	FBgn0036862	338328		71263	73288
FBgn0031515	FBgn0032801	FBgn0036198	FBgn0036875	404201		71296	73327
FBgn0014009	FBgn0039101	FBgn0036199	FBgn0036881	83657		71302	73368
FBgn0034399	FBgn0028539	FBgn0036208	FBgn0036882	440836		71310	73382
FBgn0003209	FBgn0034331	FBgn0036211	FBgn0036908	162394		71313	73422
FBgn0243486	FBgn0034295	FBgn0036213	FBgn0036910	649446		71319	73545
FBgn0086370	FBgn0003942	FBgn0036225	FBgn0036913	27303		71340	73598
FBgn0039821	FBgn0036480	FBgn0036237	FBgn0036927	9139		71354	73608
FBgn0034063	FBgn0035227	FBgn0036248	FBgn0036929	79781		71361	73635
FBgn0034085	FBgn0039594	FBgn0036254	FBgn0036931	64417		71371	73658
FBgn0000308	FBgn0030904	FBgn0036258	FBgn0036935	5980		71373	73660
FBgn0039209	FBgn0041097	FBgn0036260	FBgn0036939	2971		71389	73673
FBgn0034076	FBgn0029689	FBgn0036262	FBgn0036945	10972		71405	73680
FBgn0005624	FBgn0086359	FBgn0036264	FBgn0036948	55137		71409	73699
FBgn0024196	FBgn0033058	FBgn0036272	FBgn0036949	4257		71448	73712
FBgn0029804	FBgn0054003	FBgn0036277	FBgn0036950	342908		71474	73720
FBgn0035103	FBgn0037377	FBgn0036278	FBgn0036970	112817		71492	73723
FBgn0032498	FBgn0002563	FBgn0036279	FBgn0036975	135152		71517	73728
FBgn0039254	FBgn0036106	FBgn0036286	FBgn0036980	7320		71521	73747
FBgn0014073	FBgn0032079	FBgn0036289	FBgn0036996	83659		71522	73754
FBgn0034045	FBgn0036838	FBgn0036290	FBgn0037000	27332		71538	73826
FBgn0035900	FBgn0028697	FBgn0036298	FBgn0037007	57645		71544	73827
FBgn0029128	FBgn0039145	FBgn0036299	FBgn0037010	134549		71562	73833
FBgn0026077	FBgn0039319	FBgn0036300	FBgn0037022	151651		71566	73895
FBgn0035696	FBgn0003515	FBgn0036306	FBgn0037031	7562		71584	73910
FBgn0032856	FBgn0019938	FBgn0036316	FBgn0037045	54940		71591	73916
FBgn0050395	FBgn0041607	FBgn0036318	FBgn0037046	27443		71602	73945
FBgn0030847	FBgn0030810	FBgn0036320	FBgn0037051	54469		71609	74008
FBgn0053110	FBgn0031260	FBgn0036323	FBgn0037060	286437		71643	74015
FBgn0002645	FBgn0041582	FBgn0036332	FBgn0037065	146845		71670	74026
FBgn0025724	FBgn0052709	FBgn0036333	FBgn0037074	388815		71675	74048
FBgn0024985	FBgn0051780	FBgn0036334	FBgn0037081	153643		71682	74080
FBgn0033033	FBgn0039538	FBgn0036337	FBgn0037082	6565		71684	74091
FBgn0026084	FBgn0038135	FBgn0036359	FBgn0037093	219681		71687	74096
FBgn0038398	FBgn0085419	FBgn0036360	FBgn0037105	7323		71691	74100
FBgn0034072	FBgn0005660	FBgn0036364	FBgn0037106	8609		71701	74103
FBgn0261534	FBgn0051163	FBgn0036369	FBgn0037108	254251		71707	74105
FBgn0039487	FBgn0034618	FBgn0036372	FBgn0037109	9182		71718	74106
FBgn0263115	FBgn0035121	FBgn0036373	FBgn0037126	130132		71726	74112
FBgn0034138	FBgn0038020	FBgn0036380	FBgn0037130	3329		71728	74114
FBgn0016685	FBgn0023083	FBgn0036391	FBgn0037135	2565		71745	74117
FBgn0032025	FBgn0029814	FBgn0036414	FBgn0037138	5286		71750	74134
FBgn0034479	FBgn0026741	FBgn0036423	FBgn0037140	84085		71765	74136
FBgn0034967	FBgn0030013	FBgn0036428	FBgn0037146	389362		71768	74142
FBgn0036436	FBgn0028879	FBgn0036436	FBgn0037151	54558		71774	74143
FBgn0039311	FBgn0050499	FBgn0036447	FBgn0037163	22884		71776	74144
FBgn0004598	FBgn0025595	FBgn0036448	FBgn0037164	84298		71778	74145
FBgn0017581	FBgn0086676	FBgn0036449	FBgn0037166	6581		71779	74153
FBgn0039564	FBgn0028997	FBgn0036454	FBgn0037167	51569		71781	74154
FBgn0032431	FBgn0032752	FBgn0036460	FBgn0037181	9745		71787	74158
FBgn0025726	FBgn0046875	FBgn0036462	FBgn0037184	10000		71790	74164
FBgn0031805	FBgn0035578	FBgn0036480	FBgn0037186	150677		71803	74166
FBgn0025692	FBgn0027090	FBgn0036484	FBgn0037206	408050		71805	74178
FBgn0038680	FBgn0034817	FBgn0036487	FBgn0037207	339500		71835	74182
FBgn0035630	FBgn0030745	FBgn0036488	FBgn0037215	126820		71837	74183
FBgn0002652	FBgn0010246	FBgn0036493	FBgn0037217	374618		71868	74189
FBgn0003089	FBgn0039562	FBgn0036501	FBgn0037222	10135		71870	74192
FBgn0003082	FBgn0051646	FBgn0036520	FBgn0037225	50717		71872	74200
FBgn0035895	FBgn0028429	FBgn0036529	FBgn0037230	284058		71881	74202
FBgn0034742	FBgn0011296	FBgn0036537	FBgn0037249	138255		71884	74203
FBgn0038541	FBgn0050446	FBgn0036547	FBgn0037275	348807		71902	74205
FBgn0017561	FBgn0029512	FBgn0036549	FBgn0037288	201625		71909	74206
FBgn0036476	FBgn0025456	FBgn0036551	FBgn0037290	7621		71911	74239
FBgn0031589	FBgn0035020	FBgn0036556	FBgn0037292	122046		71924	74252
FBgn0038172	FBgn0039114	FBgn0036579	FBgn0037295	123041		71934	74256
FBgn0051189	FBgn0035707	FBgn0036583	FBgn0037298	11341		71941	74284
FBgn0035987	FBgn0038136	FBgn0036584	FBgn0037309	150209		71951	74288
FBgn0050169	FBgn0037974	FBgn0036587	FBgn0037324	163859		71968	74309
FBgn0052195	FBgn0035073	FBgn0036589	FBgn0037327	9849		71974	74315
FBgn0001218	FBgn0033381	FBgn0036597	FBgn0037330	23705		71982	74316
FBgn0016054	FBgn0031515	FBgn0036612	FBgn0037336	989		71990	74319
FBgn0035876	FBgn0039269	FBgn0036621	FBgn0037338	11016		72017	74320
FBgn0036643	FBgn0029818	FBgn0036623	FBgn0037339	5187		72022	74322
FBgn0261386	FBgn0030618	FBgn0036652	FBgn0037347	8878		72033	74342
FBgn0036389	FBgn0036691	FBgn0036656	FBgn0037359	9732		72042	74349
FBgn0011300	FBgn0034063	FBgn0036659	FBgn0037363	5928		72043	74369
FBgn0034505	FBgn0037908	FBgn0036662	FBgn0037386			72049	74388
FBgn0039641	FBgn0037870	FBgn0036665	FBgn0037387			72050	74396
FBgn0023541	FBgn0027583	FBgn0036667	FBgn0037391			72053	74410
FBgn0036589	FBgn0250869	FBgn0036680	FBgn0037405			72065	74427
FBgn0035891	FBgn0031927	FBgn0036695	FBgn0037408			72083	74438
FBgn0031752	FBgn0032498	FBgn0036698	FBgn0037410			72084	74450
FBgn0053093	FBgn0034734	FBgn0036726	FBgn0037415			72091	74456
FBgn0037515	FBgn0034045	FBgn0036727	FBgn0037445			72093	74464
FBgn0031216	FBgn0024556	FBgn0036728	FBgn0037447			72098	74477
FBgn0039678	FBgn0050047	FBgn0036734	FBgn0037448			72119	74513
FBgn0040513	FBgn0027094	FBgn0036738	FBgn0037465			72122	74521
FBgn0086710	FBgn0001324	FBgn0036740	FBgn0037468			72123	74522
FBgn0036926	FBgn0052185	FBgn0036745	FBgn0037475			72128	74525
FBgn0031360	FBgn0085281	FBgn0036749	FBgn0037487			72137	74533
FBgn0016977	FBgn0053110	FBgn0036752	FBgn0037513			72144	74563
FBgn0027567	FBgn0032785	FBgn0036757	FBgn0037515			72145	74616
FBgn0040323	FBgn0010651	FBgn0036759	FBgn0037525			72154	74626
FBgn0085625	FBgn0013672	FBgn0036760	FBgn0037531			72160	74648
FBgn0050035	FBgn0052512	FBgn0036762	FBgn0037533			72162	74694
FBgn0001222	FBgn0031053	FBgn0036765	FBgn0037534			72181	74720
FBgn0004858	FBgn0085342	FBgn0036768	FBgn0037537			72183	74754
FBgn0003499	FBgn0002626	FBgn0036769	FBgn0037546			72185	74757
FBgn0029903	FBgn0028480	FBgn0036772	FBgn0037547			72198	74760
FBgn0039208	FBgn0046322	FBgn0036773	FBgn0037548			72203	74761
FBgn0037817	FBgn0004396	FBgn0036783	FBgn0037560			72225	74762
FBgn0033244	FBgn0026084	FBgn0036786	FBgn0037562			72230	74776
FBgn0035734	FBgn0024364	FBgn0036787	FBgn0037565			72265	74841
FBgn0035083	FBgn0000477	FBgn0036791	FBgn0037581			72273	74879
FBgn0010421	FBgn0031563	FBgn0036793	FBgn0037592			72274	74901
FBgn0043070	FBgn0034138	FBgn0036813	FBgn0037603			72290	74968
FBgn0038972	FBgn0086704	FBgn0036815	FBgn0037607			72296	75033
FBgn0037955	FBgn0030056	FBgn0036816	FBgn0037623			72306	75050
FBgn0030587	FBgn0086706	FBgn0036820	FBgn0037632			72313	75060
FBgn0262808	FBgn0260658	FBgn0036821	FBgn0037633			72320	75079
FBgn0036857	FBgn0052344	FBgn0036824	FBgn0037635			72322	75087
FBgn0260768	FBgn0034967	FBgn0036828	FBgn0037636			72333	75104
FBgn0000404	FBgn0038720	FBgn0036834	FBgn0037656			72357	75141
FBgn0026255	FBgn0030439	FBgn0036836	FBgn0037678			72368	75146
FBgn0031418	FBgn0001235	FBgn0036837	FBgn0037683			72371	75180
FBgn0022986	FBgn0003366	FBgn0036838	FBgn0037702			72386	75209
FBgn0259932	FBgn0039564	FBgn0036847	FBgn0037720			72392	75210
FBgn0262898	FBgn0052333	FBgn0036857	FBgn0037721			72393	75216
FBgn0032744	FBgn0085201	FBgn0036876	FBgn0037726			72416	75219
FBgn0034391	FBgn0053775	FBgn0036888	FBgn0037730			72433	75275
FBgn0030252	FBgn0027070	FBgn0036891	FBgn0037731			72440	75305
FBgn0032202	FBgn0031805	FBgn0036906	FBgn0037747			72454	75320
FBgn0085742	FBgn0039776	FBgn0036910	FBgn0037750			72472	75420
FBgn0035237	FBgn0036659	FBgn0036919	FBgn0037757			72477	75453
FBgn0034493	FBgn0053505	FBgn0036920	FBgn0037758			72479	75469
FBgn0040551	FBgn0035630	FBgn0036921	FBgn0037760			72480	75501
FBgn0033558	FBgn0038811	FBgn0036935	FBgn0037762			72486	75512
FBgn0026160	FBgn0035247	FBgn0036937	FBgn0037763			72502	75530
FBgn0028397	FBgn0042185	FBgn0036940	FBgn0037765			72504	75540
FBgn0030334	FBgn0032838	FBgn0036942	FBgn0037778			72508	75608
FBgn0038552	FBgn0017561	FBgn0036958	FBgn0037788			72511	75617
FBgn0028717	FBgn0002736	FBgn0036974	FBgn0037796			72514	75656
FBgn0035966	FBgn0015129	FBgn0036975	FBgn0037808			72535	75659
FBgn0001219	FBgn0011582	FBgn0036985	FBgn0037814			72542	75668
[truncated: 1,635 more rows]
