# Supplementary material for: Downregulation of glial genes involved in synaptic function mitigates Huntington's disease pathogenesis
Source: eLife. 2021 Apr 19;10:e64564. doi: 10.7554/eLife.64564 (PMC8149125; doi:10.7554/eLife.64564)
Supplement: Figure 2—source data 1. [file elife-64564-fig2-data1.xlsx]

## Sheet: Sheet1
Down-Regulated Neurons (Entrez ID)	Up-Regulated Neurons (Entrez ID)	Down-Regulated Glia (Entrez ID)	Up-Regulated Glia (Entrez ID)
5142	1284	107	32
107	1287	109	216
109	1291	111	284
27115	1298	115	1436
152	1307	135	2261
153	1756	152	2263
55500	2316	153	2534
3358	3371	814	3480
2782	3655	955	3572
2788	3673	1812	3643
9568	3679	1813	3977
115	3689	2643	4067
3765	3691	2775	6237
10681	3693	2782	6654
351	3696	2785	6774
1813	3908	2786	7075
84634	4604	2788	7525
111	4637	2850	8992
5582	4638	2913	9180
2775	5033	3358	10797
2785	5062	3765	10840
2786	5829	4886	22808
10000	6584	4889	51170
1812	8974	4986	56898
4886	29954	5138	84263
4889	51056	5142	306
8997	85301	5153	2017
401190	91807	5170	2799
814	284217	5580	4036
2913	284	5581	6453
11255	558	5582	6814
88	824	5997	7018
10368	1436	5999	8673
10369	1942	8601	8773
26037	2246	9568	9026
27092	2261	10000	9341
23108	2263	10636	10791
5567	2534	10681	22836
815	2549	10846	50618
816	3480	11255	51429
2890	3572	27115	112574
2891	3643	51728	117
2892	3977	55500	183
2902	4067	773	301
2903	5154	774	2773
2904	5228	775	2791
59283	5293	776	2840
9211	5305	777	4040
79948	5613	781	5996
23646	6503	783	6423
150763	7075	784	7852
64748	7525	785	7855
8525	8660	5526	8323
8526	8992	5527	55970
9663	9180	5528	57007
85465	9846	5567	59345
23171	23239	6262	580
9890	274	6861	1105
84649	2799	8912	2737
9926	3636	9254	3014
254531	3949	9478	3065
4023	4036	23108	5934
9162	5286	55799	5970
6197	6453	116138	5978
1958	7018	998	7050
3265	7398	1020	7100
5594	8673	1123	7514
5778	9026	1630	8334
27330	9341	1795	9759
5580	11037	2043	10362
5581	11252	2047	57551
5583	22836	5058	710
1850	22837	5063	967
1848	50618	5362	3625
5801	51429	5597	4052
84867	85439	6092	5104
2002	112574	6386	5265
25791	467	7074	6678
4293	818	8997	7040
396	1385	9353	7042
398	1843	9732	7071
5597	2113	9743	7076
9743	2195	9828	7078
9828	2289	10188	7450
613	2908	10395	89932
23221	2971	10501	1994
50649	3725	23221	3178
10395	5970	23551	3181
1123	6667	25791	3189
10188	6670	50649	4670
998	7100	56924	7073
115703	7205	57144	7756
23551	8878	84448	9295
5138	11016	91584	10521
5153	710	115703	22913
29922	967	2035	54888
5434	3625	2036	55544
2983	4052	2037	140890
51728	4054	2911	220988
2643	5104	2915	467
271	5265	9066	1316
10846	7040	9228	1385
4830	7042	9229	1843
2977	7071	9369	2113
2982	7076	9378	2289
955	7078	9379	2908
90293	7450	9456	2971
6049	8826	22839	3725
114088	8844	22871	4780
55819	54518	23136	5592
9867	1195	26045	8878
64219	1994	26050	11016
84708	3178	57502	19
23327	3181	57586	948
11059	3189	58512	2195
7320	6426	116986	5465
146330	10114	347730	6256
4008	10492	87	7025
6252	10521	88	8800
29993	22913	815	25934
6456	51747	816	51129
408	55544	2890	51555
54874	220988	2891	376497
5868	3300	2892	1073
6453	3306	2902	2316
127833	3337	2903	3371
10097	5611	2904	3655
64423	6232	7102	3673
30819	10274	7111	3679
30820	10299	9260	3908
3208	10735	9495	29954
51440	23224	26037	63827
9478	25836	29767	85464
23413	29927	408	135152
7447	130872	1173	284217
83698	25	6197	25
80333	1499	6453	663
4842	2768	6456	1499
2978	3728	8120	3728
3746	8502	9829	4915
384	9043	10097	4926
2571	10672	27330	8826
22999	55740	29993	54963
2572	55914	54874	55740
6723	65059	64423	389
6785	389	127833	397
64130	397	3097	4637
793	5586	4008	9886
2752	9411	6049	10276
80331	9886	6119	10507
8927	10276	7320	23002
8497	23002	9867	23500
4133	23500	11059	58480
60	58480	11275	91807
87	93663	23291	114793
8536	114793	23327	7323
139728	5364	51761	7704
488	5365	55819	26118
2596	6237	64219	51088
1612	10156	84708	55819
3706	10507	90293	64344
57118	22808	287	151636
801	22821	288	30
4900	23654	3761	37
57172	54910	3785	2180
2562	655	3786	5825
2554	860	6323	9415
2557	4086	6326	23205
2558	4087	6328	55268
2561	4090	6334	2633
2563	4093	6710	2634
2566	7050	6712	3433
2743	10106	56479	4281
23229	10413	50	6773
2555	26043	4023	10346
56479	183	7436	23321
3785	301	8525	1488
287	2773	8526	5224
288	2778	9162	26227
6710	3760	9890	29968
6712	5996	9926	51071
3761	7852	23171	51274
3786	57007	64748	84617
7381	329	79948	1573
7416	596	84649	2876
7419	666	85465	4051
79133	1512	150763	5052
1327	4170	254531	113612
10632	7187	2571	3280
4698	8837	2572	3486
4716	9448	2752	3488
4724	19	6785	5965
47	948	6857	6117
50	5465	6860	7398
56648	6256	8497	55502
3419	7025	8927	3059
3421	51129	9699	7082
54511	94121	22999	8777
4522	989	23025	50848
10873	4735	64130	51776
56954	5414	80331	58494
5213	23176	112755	1545
2280	29896	490	4820
2281	55752	491	9360
29114	151011	801	51478
2597	5578	2257	130872
3624	7082	2258	3300
2023	8531	2259	3306
2026	8777	2324	3337
8514	50848	2596	5611
27012	51776	4900	6767
8506	58494	6263	7187
3788	2669	6416	8837
3736	3831	8536	9448
3737	10749	57118	10746
3745	11014	57172	223
3739	23303	139728	4129
3754	51479	2554	6303
55359	64147	2555	8424
259217	302	2557	55349
9530	308	2558	5033
120892	3956	2561	6584
6782	5788	2562	8974
79982	8880	2563	51056
5903	8939	2566	2171
1004	79026	2743	5479
1005	4821	23229	6876
1006	5080	27020	8407
1010	6423	476	8611
1016	7855	478	8612
55860	8323	1612	8613
57787	10215	1848	9510
10121	58508	1850	56999
5048	30	4145	57188
5116	37	5594	10299
9348	2180	5778	23471
90161	5825	5801	29927
266722	23205	5915	54510
9653	55268	6258	205428
6160	306	7068	285195
23708	1069	84867	822
2935	4012	2978	829
8193	4218	3208	5358
211	5872	3746	302
6604	8773	4842	308
27122	10791	7447	3956
7482	182	23413	79026
11197	3280	30819	1622
5127	4851	30820	3958
5128	4854	51440	6342
901	9759	80333	4821
1020	55502	3736	5080
9353	20	3737	9314
1630	477	3739	4651
6092	493	3745	4756
90249	604	3754	10095
126129	933	3757	5208
688	5592	3788	5209
23305	6468	8506	54443
5563	7704	8514	81624
8408	51088	27012	5939
1994	55819	60	27303
10949	5803	793	3831
2119	6711	4644	11014
6775	6900	10458	4487
10317	10083	26999	9355
8706	23114	83698	6900
26960	7058	644150	10083
9201	9510	613	9975
57162	56999	2254	79365
246330	57188	3265	54454
10678	223	5583	165324
11041	8424	8853	655
9899	55349	9530	4086
22987	361	153090	10106
266812	3766	283455	361
23270	3773	1977	2670
9481	8611	5903	6507
9016	8612	6782	2934
4145	8613	8195	5782
4915	2186	79982	4038
4916	11177	259217	123920
6258	27443	317649	20
5915	1573	5116	5166
7068	4051	7277	286827
6511	113612	10121	57471
6505	829	11258	123041
25830	1073	51560	58533
6014	9948	55860	2591
22871	85464	57787	81844
57502	4478	1994	55616
6543	5962	5563	5451
6546	7430	6428	5125
4311	23022	10658	1106
1636	1739	10659	79993
10653	3996	10949	81035
5646	23513	143686	182
2898	2171	211	51747
2901	6876	1628	57556
7905	8407	4862	84188
153364	1102	6604	91452
2324	5205	535	284996
10150	5224	539	347
9498	51071	1327	358
9521	4487	8745	163175
79154	9355	9211	9588
131474	7572	53616	6518
8237	84307	688	6526
83992	54625	4628	10628
112755	83666	23305	57409
283871	8908	126129	7562
57633	115123	1958	7570
6508	1545	2002	55227
10439	51478	2354	146845
40	10797	23416	8609
157807	10840	1636	6566
57687	5939	4311	115123
4121	27303	9201	1992
114805	51131	26960	6581
57484	57628	7482	83871
55607	1622	27122	23114
3423	3958	5646	93643
22895	6342	10653	196051
9590	633	9016	85461
4675	2239	9481	79781
54681	135152	57162	27106
412	4651	246330	1512
57586	4756	2119	5613
8622	10095	6775	84466
1463	23129	23270	8693
10683	28999	266812	79956
26045	5782	2898	5375
26050	7041	2901	6652
23457	204851	8502	6653
55752	9364	23037	117248
54674	3226	901	2565
91608	5166	5127	26135
221662	163175	5128	4643
9699	84874	6000	7716
23462	1070	8787	1117
64393	10611	401190	10165
54769	4118	384	64067
1960	57584	6723	23111
23031	29994	9899	8780
9905	5455	22987	79443
117247	5454	3632	64093
57863	55636	3706	7779
10769	1106	6014	55914
55827	81031	25830	2669
535	9454	6505	23657
83482	5129	6511	124540
65055	5125	6543	54910
23072	84002	6546	54918
91683	55366	91	7837
1628	3148	3624	6815
576	79956	55509	6535
4674	79993	5122	23213
50859	23705	57181	4814
9806	4038	11346	23250
347730	10397	10396	8140
151126	57556	29799	79602
284252	5355	283871	2803
3682	57606	23732	2004
7782	8462	2115	10016
10858	84263	10299	5891
23154	55616	83992	1836
83394	347	79085	83733
4753	7227	9508	11031
5800	358	54769	81542
124359	84333	8490	220972
56704	6518	9077	2005
9331	6526	56341	117583
90806	10628	4345	11104
23228	91526	9498	55137
3775	57409	220164	7026
6860	28996	340146	4982
6861	7562	29967	10105
56899	64067	94081	84288
79589	55227	5297	253827
23284	284058	8237	84874
770	55023	55342	10123
771	26018	54329	9124
4738	6566	23640	7077
11022	6581	2138	11177
5909	1465	104	4012
23324	85440	157807	11183
120114	9667	2161	127933
5937	7621	4212	9169
139065	93643	114805	5454
3642	165324	2172	23513
201562	26064	54976	2013
862	9124	114818	10206
7008	27106	9348	51365
8034	26084	124359	23527
148252	84466	57484	9201
9066	8693	284252	57045
9077	285268	257194	57561
202559	6652	10953	3075
2941	117248	9758	4124
80777	8405	56704	84002
283417	2565	60680	2098
64409	8140	57611	1116
54976	7769	8470	10365
1961	26137	146713	81031
23466	196527	10289	5269
84916	2591	22849	23705
57181	4643	22853	25796
9148	7716	8522	5355
4037	196051	22859	57628
134111	339500	57687	25891
23531	1117	25999	29994
23037	10519	3642	85315
144165	1593	3423	28999
6376	56898	3131	79877
51303	56907	83857	4117
4212	79365	6508	3148
5274	79443	54674	5205
257194	9819	57711	10434
56521	55900	93986	10492
4345	64093	26575	57606
5504	7779	79154	8462
94081	5052	85397	79152
80144	23657	64919	5455
22859	636	412	1593
22865	54918	114928
104	84617	4522
29967	4750	1463
5122	4752	29114
4338	9873	27069
2161	6815	51646
84189	9499	26051
79085	6535	23031
2287	23213	10150
8470	3764	27086
22841	23250	22895
8508	64215	91608
8522	81624	23017
9218	10362	221692
54112	170960	117247
55342	83871	57863
25953	8934	56853
57611	1767	83482
55335	124540	5662
4139	8938	65055
1730	64236	23072
2115	79602	7008
51310	2004	576
145581	1836	4674
56341	23321	4675
3131	7813	3682
64754	81628	9806
10472	5927	80144
129049	81704	610
	220972	10683
	1842	7782
	23344	10857
	23348	10858
	23363	23154
	89932	5909
	5965	4738
	117583	23178
	825	10178
	64344	4753
	23406	10900
	7026	283417
	64376	54715
	23418	54681
	54893	5797
	85315	5800
	54165	90806
	284996	3775
	7077	11041
	55213	7799
	5980	56899
	7837	1750
	4026	10873
	127933	79589
	5796	81689
	1992	23284
	23499	143098
	84288	770
	9169	771
	2005	11022
	51170	23324
	23527	7644
	6653	57132
	9201	120114
	2040	2039
	1018	139065
	1466	138046
	5130	9024
	123920	5954
	4124	140733
	54469	862
	9588	54112
	91452	388962
	2098	148252
	123041	4976
	57568	55103
	25891	80777
	140609	26507
	79645	64409
	79877	23457
	10365	23462
	5269	1960
	83481	1961
	8019	83891
	23603	11189
	285195	9148
	3433	54212
	51365	4037
	25796	5453
	216	51105
	57561	7162
	84188	81892
	5375	23531
	79152	1006
	22906	5274
	8572	8720
	3075	57633
	1105	145581
	1116	390205
		64754
		51310
		1730
		129049
		4139
		55359
		40
		29761
		10516
		10472
		10231
		8034
		57574
		7443
		8038
