# Supplementary material for: Downregulation of glial genes involved in synaptic function mitigates Huntington's disease pathogenesis
Source: eLife. 2021 Apr 19;10:e64564. doi: 10.7554/eLife.64564 (PMC8149125; doi:10.7554/eLife.64564)
Supplement: Figure 3—figure supplement 1—source data 1. [file elife-64564-fig3-figsupp1-data1.xlsx]

## Sheet: AGAP2
CenG1A BDSC 20232						CenG1A BDSC 57970						CenG1A BDSC 59465						CenG1A BDSC 61716
Trialday	Replicate	Genotype	Observation	Metric		Trialday	Replicate	Genotype	Observation	Metric		Trialday	Replicate	Genotype	Observation	Metric		Trialday	Pos	Replicate	Genotype	Observation	Metric
2	1	Non_targeting_hpRNA_glial_mHTT	14.2278	speed		1	1	Non_targeting_hpRNA_glial_mHTT	12.186	speed		1	1	Non_targeting_hpRNA_glial_mHTT	12.186	speed		1	A01	1	Non_targeting_hpRNA_glial_mHTT	12.186	speed
2	2	Non_targeting_hpRNA_glial_mHTT	15.5571	speed		1	2	Non_targeting_hpRNA_glial_mHTT	12.7909	speed		1	2	Non_targeting_hpRNA_glial_mHTT	12.7909	speed		1	B02	2	Non_targeting_hpRNA_glial_mHTT	12.7909	speed
2	3	Non_targeting_hpRNA_glial_mHTT	14.5411	speed		2	1	Non_targeting_hpRNA_glial_mHTT	11.6151	speed		2	1	Non_targeting_hpRNA_glial_mHTT	11.6151	speed		2	A01	1	Non_targeting_hpRNA_glial_mHTT	11.6151	speed
3	1	Non_targeting_hpRNA_glial_mHTT	12.1723	speed		2	2	Non_targeting_hpRNA_glial_mHTT	12.1219	speed		2	2	Non_targeting_hpRNA_glial_mHTT	12.1219	speed		2	B02	2	Non_targeting_hpRNA_glial_mHTT	12.1219	speed
3	2	Non_targeting_hpRNA_glial_mHTT	12.2934	speed		3	1	Non_targeting_hpRNA_glial_mHTT	9.94744	speed		3	1	Non_targeting_hpRNA_glial_mHTT	9.94744	speed		3	A01	1	Non_targeting_hpRNA_glial_mHTT	9.94744	speed
3	3	Non_targeting_hpRNA_glial_mHTT	9.53973	speed		3	2	Non_targeting_hpRNA_glial_mHTT	11.7971	speed		3	2	Non_targeting_hpRNA_glial_mHTT	11.7971	speed		3	B02	2	Non_targeting_hpRNA_glial_mHTT	11.7971	speed
4	1	Non_targeting_hpRNA_glial_mHTT	8.78102	speed		4	1	Non_targeting_hpRNA_glial_mHTT	9.85299	speed		4	1	Non_targeting_hpRNA_glial_mHTT	9.85299	speed		4	A01	1	Non_targeting_hpRNA_glial_mHTT	9.85299	speed
4	2	Non_targeting_hpRNA_glial_mHTT	10.7369	speed		4	2	Non_targeting_hpRNA_glial_mHTT	10.6864	speed		4	2	Non_targeting_hpRNA_glial_mHTT	10.6864	speed		4	B02	2	Non_targeting_hpRNA_glial_mHTT	10.6864	speed
4	3	Non_targeting_hpRNA_glial_mHTT	9.95084	speed		5	1	Non_targeting_hpRNA_glial_mHTT	5.32302	speed		5	1	Non_targeting_hpRNA_glial_mHTT	5.32302	speed		5	A01	1	Non_targeting_hpRNA_glial_mHTT	5.32302	speed
5	1	Non_targeting_hpRNA_glial_mHTT	5.73557	speed		5	2	Non_targeting_hpRNA_glial_mHTT	10.4062	speed		5	2	Non_targeting_hpRNA_glial_mHTT	10.4062	speed		5	B02	2	Non_targeting_hpRNA_glial_mHTT	10.4062	speed
5	2	Non_targeting_hpRNA_glial_mHTT	9.92094	speed		6	1	Non_targeting_hpRNA_glial_mHTT	1.35658	speed		6	1	Non_targeting_hpRNA_glial_mHTT	1.35658	speed		6	A01	1	Non_targeting_hpRNA_glial_mHTT	1.35658	speed
5	3	Non_targeting_hpRNA_glial_mHTT	10.0181	speed		6	2	Non_targeting_hpRNA_glial_mHTT	6.91932	speed		6	2	Non_targeting_hpRNA_glial_mHTT	6.91932	speed		6	B02	2	Non_targeting_hpRNA_glial_mHTT	6.91932	speed
6	1	Non_targeting_hpRNA_glial_mHTT	4.91453	speed		7	1	Non_targeting_hpRNA_glial_mHTT	8.64577	speed		7	1	Non_targeting_hpRNA_glial_mHTT	8.64577	speed		7	A01	1	Non_targeting_hpRNA_glial_mHTT	8.64577	speed
6	2	Non_targeting_hpRNA_glial_mHTT	9.42369	speed		7	2	Non_targeting_hpRNA_glial_mHTT	8.6402	speed		7	2	Non_targeting_hpRNA_glial_mHTT	8.6402	speed		7	B02	2	Non_targeting_hpRNA_glial_mHTT	8.6402	speed
6	3	Non_targeting_hpRNA_glial_mHTT	9.29628	speed		8	1	Non_targeting_hpRNA_glial_mHTT	5.00066	speed		8	1	Non_targeting_hpRNA_glial_mHTT	5.00066	speed		8	A01	1	Non_targeting_hpRNA_glial_mHTT	5.00066	speed
7	1	Non_targeting_hpRNA_glial_mHTT	4.65538	speed		8	2	Non_targeting_hpRNA_glial_mHTT	6.39159	speed		8	2	Non_targeting_hpRNA_glial_mHTT	6.39159	speed		8	B02	2	Non_targeting_hpRNA_glial_mHTT	6.39159	speed
7	2	Non_targeting_hpRNA_glial_mHTT	4.87125	speed		1	3	Non_targeting_hpRNA_glial_mHTT	11.5646	speed		1	3	Non_targeting_hpRNA_glial_mHTT	11.5646	speed		1	A01	3	Non_targeting_hpRNA_glial_mHTT	11.5646	speed
7	3	Non_targeting_hpRNA_glial_mHTT	8.14019	speed		1	4	Non_targeting_hpRNA_glial_mHTT	10.6456	speed		1	4	Non_targeting_hpRNA_glial_mHTT	10.6456	speed		1	C02	4	Non_targeting_hpRNA_glial_mHTT	10.6456	speed
8	1	Non_targeting_hpRNA_glial_mHTT	3.44567	speed		1	5	Non_targeting_hpRNA_glial_mHTT	8.89028	speed		1	5	Non_targeting_hpRNA_glial_mHTT	8.89028	speed		1	G02	5	Non_targeting_hpRNA_glial_mHTT	8.89028	speed
8	2	Non_targeting_hpRNA_glial_mHTT	5.02795	speed		2	3	Non_targeting_hpRNA_glial_mHTT	9.55612	speed		2	3	Non_targeting_hpRNA_glial_mHTT	9.55612	speed		2	A01	3	Non_targeting_hpRNA_glial_mHTT	9.55612	speed
8	3	Non_targeting_hpRNA_glial_mHTT	4.10722	speed		2	4	Non_targeting_hpRNA_glial_mHTT	12.9619	speed		2	4	Non_targeting_hpRNA_glial_mHTT	12.9619	speed		2	C02	4	Non_targeting_hpRNA_glial_mHTT	12.9619	speed
9	1	Non_targeting_hpRNA_glial_mHTT	6.6524	speed		2	5	Non_targeting_hpRNA_glial_mHTT	12.984	speed		2	5	Non_targeting_hpRNA_glial_mHTT	12.984	speed		2	G02	5	Non_targeting_hpRNA_glial_mHTT	12.984	speed
9	2	Non_targeting_hpRNA_glial_mHTT	7.84532	speed		3	3	Non_targeting_hpRNA_glial_mHTT	9.64493	speed		3	3	Non_targeting_hpRNA_glial_mHTT	9.64493	speed		3	A01	3	Non_targeting_hpRNA_glial_mHTT	9.64493	speed
9	3	Non_targeting_hpRNA_glial_mHTT	7.73044	speed		3	4	Non_targeting_hpRNA_glial_mHTT	12.1723	speed		3	4	Non_targeting_hpRNA_glial_mHTT	12.1723	speed		3	C02	4	Non_targeting_hpRNA_glial_mHTT	12.1723	speed
10	1	Non_targeting_hpRNA_glial_mHTT	3.7822	speed		3	5	Non_targeting_hpRNA_glial_mHTT	10.8503	speed		3	5	Non_targeting_hpRNA_glial_mHTT	10.8503	speed		3	G02	5	Non_targeting_hpRNA_glial_mHTT	10.8503	speed
10	2	Non_targeting_hpRNA_glial_mHTT	3.05975	speed		4	3	Non_targeting_hpRNA_glial_mHTT	7.78815	speed		4	3	Non_targeting_hpRNA_glial_mHTT	7.78815	speed		4	A01	3	Non_targeting_hpRNA_glial_mHTT	7.78815	speed
10	3	Non_targeting_hpRNA_glial_mHTT	6.99881	speed		4	4	Non_targeting_hpRNA_glial_mHTT	6.44811	speed		4	4	Non_targeting_hpRNA_glial_mHTT	6.44811	speed		4	C02	4	Non_targeting_hpRNA_glial_mHTT	6.44811	speed
2	4	Non_targeting_hpRNA_glial_mHTT	11.6946	speed		4	5	Non_targeting_hpRNA_glial_mHTT	10.727	speed		4	5	Non_targeting_hpRNA_glial_mHTT	10.727	speed		4	G02	5	Non_targeting_hpRNA_glial_mHTT	10.727	speed
2	5	Non_targeting_hpRNA_glial_mHTT	12.322	speed		5	3	Non_targeting_hpRNA_glial_mHTT	7.63764	speed		5	3	Non_targeting_hpRNA_glial_mHTT	7.63764	speed		5	A01	3	Non_targeting_hpRNA_glial_mHTT	7.63764	speed
2	6	Non_targeting_hpRNA_glial_mHTT	11.7243	speed		5	4	Non_targeting_hpRNA_glial_mHTT	9.00362	speed		5	4	Non_targeting_hpRNA_glial_mHTT	9.00362	speed		5	C02	4	Non_targeting_hpRNA_glial_mHTT	9.00362	speed
2	7	Non_targeting_hpRNA_glial_mHTT	11.9576	speed		5	5	Non_targeting_hpRNA_glial_mHTT	6.61344	speed		5	5	Non_targeting_hpRNA_glial_mHTT	6.61344	speed		5	G02	5	Non_targeting_hpRNA_glial_mHTT	6.61344	speed
2	8	Non_targeting_hpRNA_glial_mHTT	10.4241	speed		6	3	Non_targeting_hpRNA_glial_mHTT	7.03368	speed		6	3	Non_targeting_hpRNA_glial_mHTT	7.03368	speed		6	A01	3	Non_targeting_hpRNA_glial_mHTT	7.03368	speed
2	9	Non_targeting_hpRNA_glial_mHTT	11.88	speed		6	4	Non_targeting_hpRNA_glial_mHTT	8.17837	speed		6	4	Non_targeting_hpRNA_glial_mHTT	8.17837	speed		6	C02	4	Non_targeting_hpRNA_glial_mHTT	8.17837	speed
3	4	Non_targeting_hpRNA_glial_mHTT	11.9101	speed		6	5	Non_targeting_hpRNA_glial_mHTT	4.80799	speed		6	5	Non_targeting_hpRNA_glial_mHTT	4.80799	speed		6	G02	5	Non_targeting_hpRNA_glial_mHTT	4.80799	speed
3	5	Non_targeting_hpRNA_glial_mHTT	12.1479	speed		7	3	Non_targeting_hpRNA_glial_mHTT	3.50538	speed		7	3	Non_targeting_hpRNA_glial_mHTT	3.50538	speed		7	A01	3	Non_targeting_hpRNA_glial_mHTT	3.50538	speed
3	6	Non_targeting_hpRNA_glial_mHTT	12.3648	speed		7	4	Non_targeting_hpRNA_glial_mHTT	5.17438	speed		7	4	Non_targeting_hpRNA_glial_mHTT	5.17438	speed		7	C02	4	Non_targeting_hpRNA_glial_mHTT	5.17438	speed
3	7	Non_targeting_hpRNA_glial_mHTT	13.3803	speed		7	5	Non_targeting_hpRNA_glial_mHTT	1.83189	speed		7	5	Non_targeting_hpRNA_glial_mHTT	1.83189	speed		7	G02	5	Non_targeting_hpRNA_glial_mHTT	1.83189	speed
3	8	Non_targeting_hpRNA_glial_mHTT	10.8529	speed		8	3	Non_targeting_hpRNA_glial_mHTT	5.40236	speed		8	3	Non_targeting_hpRNA_glial_mHTT	5.40236	speed		8	A01	3	Non_targeting_hpRNA_glial_mHTT	5.40236	speed
3	9	Non_targeting_hpRNA_glial_mHTT	11.6781	speed		8	4	Non_targeting_hpRNA_glial_mHTT	4.93599	speed		8	4	Non_targeting_hpRNA_glial_mHTT	4.93599	speed		8	C02	4	Non_targeting_hpRNA_glial_mHTT	4.93599	speed
4	4	Non_targeting_hpRNA_glial_mHTT	8.41563	speed		8	5	Non_targeting_hpRNA_glial_mHTT	5.66823	speed		8	5	Non_targeting_hpRNA_glial_mHTT	5.66823	speed		8	G02	5	Non_targeting_hpRNA_glial_mHTT	5.66823	speed
4	5	Non_targeting_hpRNA_glial_mHTT	11.4763	speed		9	3	Non_targeting_hpRNA_glial_mHTT	2.16147	speed		9	3	Non_targeting_hpRNA_glial_mHTT	2.16147	speed		9	A01	3	Non_targeting_hpRNA_glial_mHTT	2.16147	speed
4	6	Non_targeting_hpRNA_glial_mHTT	10.7076	speed		9	4	Non_targeting_hpRNA_glial_mHTT	2.57011	speed		9	4	Non_targeting_hpRNA_glial_mHTT	2.57011	speed		9	C02	4	Non_targeting_hpRNA_glial_mHTT	2.57011	speed
4	7	Non_targeting_hpRNA_glial_mHTT	10.2271	speed		9	5	Non_targeting_hpRNA_glial_mHTT	1.9203	speed		9	5	Non_targeting_hpRNA_glial_mHTT	1.9203	speed		9	G02	5	Non_targeting_hpRNA_glial_mHTT	1.9203	speed
4	8	Non_targeting_hpRNA_glial_mHTT	10.6616	speed		1	6	Non_targeting_hpRNA_glial_mHTT	10.9354	speed		1	6	Non_targeting_hpRNA_glial_mHTT	10.9354	speed		1	A01	6	Non_targeting_hpRNA_glial_mHTT	10.9354	speed
4	9	Non_targeting_hpRNA_glial_mHTT	10.7341	speed		2	6	Non_targeting_hpRNA_glial_mHTT	11.6443	speed		2	6	Non_targeting_hpRNA_glial_mHTT	11.6443	speed		2	A01	6	Non_targeting_hpRNA_glial_mHTT	11.6443	speed
5	4	Non_targeting_hpRNA_glial_mHTT	7.73139	speed		3	6	Non_targeting_hpRNA_glial_mHTT	13.4473	speed		3	6	Non_targeting_hpRNA_glial_mHTT	13.4473	speed		3	A01	6	Non_targeting_hpRNA_glial_mHTT	13.4473	speed
5	5	Non_targeting_hpRNA_glial_mHTT	8.67637	speed		4	6	Non_targeting_hpRNA_glial_mHTT	9.2254	speed		4	6	Non_targeting_hpRNA_glial_mHTT	9.2254	speed		4	A01	6	Non_targeting_hpRNA_glial_mHTT	9.2254	speed
5	6	Non_targeting_hpRNA_glial_mHTT	8.29841	speed		5	6	Non_targeting_hpRNA_glial_mHTT	11.5363	speed		5	6	Non_targeting_hpRNA_glial_mHTT	11.5363	speed		5	A01	6	Non_targeting_hpRNA_glial_mHTT	11.5363	speed
5	7	Non_targeting_hpRNA_glial_mHTT	5.94291	speed		6	6	Non_targeting_hpRNA_glial_mHTT	4.02543	speed		6	6	Non_targeting_hpRNA_glial_mHTT	4.02543	speed		6	A01	6	Non_targeting_hpRNA_glial_mHTT	4.02543	speed
5	8	Non_targeting_hpRNA_glial_mHTT	7.57793	speed		7	6	Non_targeting_hpRNA_glial_mHTT	2.12227	speed		7	6	Non_targeting_hpRNA_glial_mHTT	2.12227	speed		7	A01	6	Non_targeting_hpRNA_glial_mHTT	2.12227	speed
5	9	Non_targeting_hpRNA_glial_mHTT	9.04111	speed		8	6	Non_targeting_hpRNA_glial_mHTT	4.74043	speed		8	6	Non_targeting_hpRNA_glial_mHTT	4.74043	speed		8	A01	6	Non_targeting_hpRNA_glial_mHTT	4.74043	speed
6	4	Non_targeting_hpRNA_glial_mHTT	7.13998	speed		9	6	Non_targeting_hpRNA_glial_mHTT	4.6059	speed		9	6	Non_targeting_hpRNA_glial_mHTT	4.6059	speed		9	A01	6	Non_targeting_hpRNA_glial_mHTT	4.6059	speed
6	5	Non_targeting_hpRNA_glial_mHTT	8.83237	speed		1	1	siHTT_glial_mHTT	12.5356	speed		1	1	siHTT_glial_mHTT	12.5356	speed		1	A02	1	siHTT_glial_mHTT	12.5356	speed
6	6	Non_targeting_hpRNA_glial_mHTT	7.65282	speed		1	2	siHTT_glial_mHTT	11.4488	speed		1	2	siHTT_glial_mHTT	11.4488	speed		1	C02	2	siHTT_glial_mHTT	11.4488	speed
6	7	Non_targeting_hpRNA_glial_mHTT	7.90555	speed		2	1	siHTT_glial_mHTT	12.1656	speed		2	1	siHTT_glial_mHTT	12.1656	speed		2	A02	1	siHTT_glial_mHTT	12.1656	speed
6	8	Non_targeting_hpRNA_glial_mHTT	8.78279	speed		2	2	siHTT_glial_mHTT	13.2191	speed		2	2	siHTT_glial_mHTT	13.2191	speed		2	C02	2	siHTT_glial_mHTT	13.2191	speed
6	9	Non_targeting_hpRNA_glial_mHTT	9.46893	speed		3	1	siHTT_glial_mHTT	13.6606	speed		3	1	siHTT_glial_mHTT	13.6606	speed		3	A02	1	siHTT_glial_mHTT	13.6606	speed
7	4	Non_targeting_hpRNA_glial_mHTT	5.6189	speed		3	2	siHTT_glial_mHTT	11.9763	speed		3	2	siHTT_glial_mHTT	11.9763	speed		3	C02	2	siHTT_glial_mHTT	11.9763	speed
7	5	Non_targeting_hpRNA_glial_mHTT	5.35695	speed		4	1	siHTT_glial_mHTT	13.0399	speed		4	1	siHTT_glial_mHTT	13.0399	speed		4	A02	1	siHTT_glial_mHTT	13.0399	speed
7	6	Non_targeting_hpRNA_glial_mHTT	6.16701	speed		4	2	siHTT_glial_mHTT	10.0979	speed		4	2	siHTT_glial_mHTT	10.0979	speed		4	C02	2	siHTT_glial_mHTT	10.0979	speed
7	7	Non_targeting_hpRNA_glial_mHTT	6.5794	speed		5	1	siHTT_glial_mHTT	13.4475	speed		5	1	siHTT_glial_mHTT	13.4475	speed		5	A02	1	siHTT_glial_mHTT	13.4475	speed
7	8	Non_targeting_hpRNA_glial_mHTT	3.15871	speed		5	2	siHTT_glial_mHTT	11.978	speed		5	2	siHTT_glial_mHTT	11.978	speed		5	C02	2	siHTT_glial_mHTT	11.978	speed
7	9	Non_targeting_hpRNA_glial_mHTT	6.84853	speed		6	1	siHTT_glial_mHTT	13.5401	speed		6	1	siHTT_glial_mHTT	13.5401	speed		6	A02	1	siHTT_glial_mHTT	13.5401	speed
8	4	Non_targeting_hpRNA_glial_mHTT	3.70587	speed		6	2	siHTT_glial_mHTT	11.5133	speed		6	2	siHTT_glial_mHTT	11.5133	speed		6	C02	2	siHTT_glial_mHTT	11.5133	speed
8	5	Non_targeting_hpRNA_glial_mHTT	5.43729	speed		7	1	siHTT_glial_mHTT	12.4868	speed		7	1	siHTT_glial_mHTT	12.4868	speed		7	A02	1	siHTT_glial_mHTT	12.4868	speed
8	6	Non_targeting_hpRNA_glial_mHTT	4.08136	speed		7	2	siHTT_glial_mHTT	12.7704	speed		7	2	siHTT_glial_mHTT	12.7704	speed		7	C02	2	siHTT_glial_mHTT	12.7704	speed
8	7	Non_targeting_hpRNA_glial_mHTT	6.7945	speed		8	1	siHTT_glial_mHTT	11.8278	speed		8	1	siHTT_glial_mHTT	11.8278	speed		8	A02	1	siHTT_glial_mHTT	11.8278	speed
8	8	Non_targeting_hpRNA_glial_mHTT	5.31661	speed		8	2	siHTT_glial_mHTT	13.1025	speed		8	2	siHTT_glial_mHTT	13.1025	speed		8	C02	2	siHTT_glial_mHTT	13.1025	speed
8	9	Non_targeting_hpRNA_glial_mHTT	5.52046	speed		1	2	siHTT_glial_mHTT	10.2567	speed		1	2	siHTT_glial_mHTT	10.2567	speed		1	A02	2	siHTT_glial_mHTT	10.2567	speed
9	4	Non_targeting_hpRNA_glial_mHTT	4.34657	speed		1	3	siHTT_glial_mHTT	9.56936	speed		1	3	siHTT_glial_mHTT	9.56936	speed		1	D09	3	siHTT_glial_mHTT	9.56936	speed
9	5	Non_targeting_hpRNA_glial_mHTT	2.85177	speed		1	4	siHTT_glial_mHTT	11.8178	speed		1	4	siHTT_glial_mHTT	11.8178	speed		1	F08	4	siHTT_glial_mHTT	11.8178	speed
9	6	Non_targeting_hpRNA_glial_mHTT	4.6864	speed		2	2	siHTT_glial_mHTT	12.7563	speed		2	2	siHTT_glial_mHTT	12.7563	speed		2	A02	2	siHTT_glial_mHTT	12.7563	speed
9	7	Non_targeting_hpRNA_glial_mHTT	4.86627	speed		2	3	siHTT_glial_mHTT	13.1716	speed		2	3	siHTT_glial_mHTT	13.1716	speed		2	D09	3	siHTT_glial_mHTT	13.1716	speed
9	8	Non_targeting_hpRNA_glial_mHTT	5.56095	speed		2	4	siHTT_glial_mHTT	13.6013	speed		2	4	siHTT_glial_mHTT	13.6013	speed		2	F08	4	siHTT_glial_mHTT	13.6013	speed
9	9	Non_targeting_hpRNA_glial_mHTT	5.22565	speed		3	2	siHTT_glial_mHTT	14.3955	speed		3	2	siHTT_glial_mHTT	14.3955	speed		3	A02	2	siHTT_glial_mHTT	14.3955	speed
10	4	Non_targeting_hpRNA_glial_mHTT	5.04009	speed		3	3	siHTT_glial_mHTT	12.5809	speed		3	3	siHTT_glial_mHTT	12.5809	speed		3	D09	3	siHTT_glial_mHTT	12.5809	speed
10	5	Non_targeting_hpRNA_glial_mHTT	6.0648	speed		3	4	siHTT_glial_mHTT	13.2191	speed		3	4	siHTT_glial_mHTT	13.2191	speed		3	F08	4	siHTT_glial_mHTT	13.2191	speed
10	6	Non_targeting_hpRNA_glial_mHTT	5.77228	speed		4	2	siHTT_glial_mHTT	13.2839	speed		4	2	siHTT_glial_mHTT	13.2839	speed		4	A02	2	siHTT_glial_mHTT	13.2839	speed
10	7	Non_targeting_hpRNA_glial_mHTT	5.35377	speed		4	3	siHTT_glial_mHTT	13.8132	speed		4	3	siHTT_glial_mHTT	13.8132	speed		4	D09	3	siHTT_glial_mHTT	13.8132	speed
10	8	Non_targeting_hpRNA_glial_mHTT	6.00173	speed		4	4	siHTT_glial_mHTT	12.4869	speed		4	4	siHTT_glial_mHTT	12.4869	speed		4	F08	4	siHTT_glial_mHTT	12.4869	speed
10	9	Non_targeting_hpRNA_glial_mHTT	5.95935	speed		5	2	siHTT_glial_mHTT	13.31	speed		5	2	siHTT_glial_mHTT	13.31	speed		5	A02	2	siHTT_glial_mHTT	13.31	speed
2	1	siHTT_glial_mHTT	13.2992	speed		5	3	siHTT_glial_mHTT	10.8609	speed		5	3	siHTT_glial_mHTT	10.8609	speed		5	D09	3	siHTT_glial_mHTT	10.8609	speed
2	2	siHTT_glial_mHTT	13.3696	speed		5	4	siHTT_glial_mHTT	13.15	speed		5	4	siHTT_glial_mHTT	13.15	speed		5	F08	4	siHTT_glial_mHTT	13.15	speed
2	3	siHTT_glial_mHTT	13.4244	speed		6	2	siHTT_glial_mHTT	10.7814	speed		6	2	siHTT_glial_mHTT	10.7814	speed		6	A02	2	siHTT_glial_mHTT	10.7814	speed
3	1	siHTT_glial_mHTT	12.2189	speed		6	3	siHTT_glial_mHTT	14.081	speed		6	3	siHTT_glial_mHTT	14.081	speed		6	D09	3	siHTT_glial_mHTT	14.081	speed
3	2	siHTT_glial_mHTT	15.1816	speed		6	4	siHTT_glial_mHTT	13.5522	speed		6	4	siHTT_glial_mHTT	13.5522	speed		6	F08	4	siHTT_glial_mHTT	13.5522	speed
3	3	siHTT_glial_mHTT	13.605	speed		7	2	siHTT_glial_mHTT	12.7851	speed		7	2	siHTT_glial_mHTT	12.7851	speed		7	A02	2	siHTT_glial_mHTT	12.7851	speed
4	1	siHTT_glial_mHTT	9.0569	speed		7	3	siHTT_glial_mHTT	12.3284	speed		7	3	siHTT_glial_mHTT	12.3284	speed		7	D09	3	siHTT_glial_mHTT	12.3284	speed
4	2	siHTT_glial_mHTT	11.138	speed		7	4	siHTT_glial_mHTT	11.6353	speed		7	4	siHTT_glial_mHTT	11.6353	speed		7	F08	4	siHTT_glial_mHTT	11.6353	speed
4	3	siHTT_glial_mHTT	11.5359	speed		8	2	siHTT_glial_mHTT	12.551	speed		8	2	siHTT_glial_mHTT	12.551	speed		8	A02	2	siHTT_glial_mHTT	12.551	speed
5	1	siHTT_glial_mHTT	10.8251	speed		8	3	siHTT_glial_mHTT	12.3522	speed		8	3	siHTT_glial_mHTT	12.3522	speed		8	D09	3	siHTT_glial_mHTT	12.3522	speed
5	2	siHTT_glial_mHTT	12.4236	speed		8	4	siHTT_glial_mHTT	11.9198	speed		8	4	siHTT_glial_mHTT	11.9198	speed		8	F08	4	siHTT_glial_mHTT	11.9198	speed
5	3	siHTT_glial_mHTT	11.2458	speed		9	2	siHTT_glial_mHTT	12.8324	speed		9	2	siHTT_glial_mHTT	12.8324	speed		9	A02	2	siHTT_glial_mHTT	12.8324	speed
6	1	siHTT_glial_mHTT	11.8401	speed		9	3	siHTT_glial_mHTT	12.288	speed		9	3	siHTT_glial_mHTT	12.288	speed		9	D09	3	siHTT_glial_mHTT	12.288	speed
6	2	siHTT_glial_mHTT	13.5891	speed		9	4	siHTT_glial_mHTT	11.3166	speed		9	4	siHTT_glial_mHTT	11.3166	speed		9	F08	4	siHTT_glial_mHTT	11.3166	speed
6	3	siHTT_glial_mHTT	12.2754	speed		1	5	siHTT_glial_mHTT	11.3322	speed		1	5	siHTT_glial_mHTT	11.3322	speed		1	A02	5	siHTT_glial_mHTT	11.3322	speed
7	1	siHTT_glial_mHTT	11.1653	speed		1	6	siHTT_glial_mHTT	11.6054	speed		1	6	siHTT_glial_mHTT	11.6054	speed		1	D01	6	siHTT_glial_mHTT	11.6054	speed
7	2	siHTT_glial_mHTT	11.6307	speed		1	7	siHTT_glial_mHTT	10.7686	speed		1	7	siHTT_glial_mHTT	10.7686	speed		1	E06	7	siHTT_glial_mHTT	10.7686	speed
7	3	siHTT_glial_mHTT	11.1752	speed		2	5	siHTT_glial_mHTT	11.9043	speed		2	5	siHTT_glial_mHTT	11.9043	speed		2	A02	5	siHTT_glial_mHTT	11.9043	speed
8	1	siHTT_glial_mHTT	12.4244	speed		2	6	siHTT_glial_mHTT	11.5123	speed		2	6	siHTT_glial_mHTT	11.5123	speed		2	D01	6	siHTT_glial_mHTT	11.5123	speed
8	2	siHTT_glial_mHTT	12.1311	speed		2	7	siHTT_glial_mHTT	5.13955	speed		2	7	siHTT_glial_mHTT	5.13955	speed		2	E06	7	siHTT_glial_mHTT	5.13955	speed
8	3	siHTT_glial_mHTT	11.0372	speed		3	5	siHTT_glial_mHTT	14.1215	speed		3	5	siHTT_glial_mHTT	14.1215	speed		3	A02	5	siHTT_glial_mHTT	14.1215	speed
9	1	siHTT_glial_mHTT	11.8206	speed		3	6	siHTT_glial_mHTT	14.713	speed		3	6	siHTT_glial_mHTT	14.713	speed		3	D01	6	siHTT_glial_mHTT	14.713	speed
9	2	siHTT_glial_mHTT	10.974	speed		3	7	siHTT_glial_mHTT	12.4855	speed		3	7	siHTT_glial_mHTT	12.4855	speed		3	E06	7	siHTT_glial_mHTT	12.4855	speed
9	3	siHTT_glial_mHTT	11.8046	speed		4	5	siHTT_glial_mHTT	13.1075	speed		4	5	siHTT_glial_mHTT	13.1075	speed		4	A02	5	siHTT_glial_mHTT	13.1075	speed
10	1	siHTT_glial_mHTT	12.2077	speed		4	6	siHTT_glial_mHTT	12.9115	speed		4	6	siHTT_glial_mHTT	12.9115	speed		4	D01	6	siHTT_glial_mHTT	12.9115	speed
10	2	siHTT_glial_mHTT	11.9961	speed		4	7	siHTT_glial_mHTT	13.2786	speed		4	7	siHTT_glial_mHTT	13.2786	speed		4	E06	7	siHTT_glial_mHTT	13.2786	speed
10	3	siHTT_glial_mHTT	11.2358	speed		5	5	siHTT_glial_mHTT	12.6432	speed		5	5	siHTT_glial_mHTT	12.6432	speed		5	A02	5	siHTT_glial_mHTT	12.6432	speed
2	4	siHTT_glial_mHTT	12.0412	speed		5	6	siHTT_glial_mHTT	10.2839	speed		5	6	siHTT_glial_mHTT	10.2839	speed		5	D01	6	siHTT_glial_mHTT	10.2839	speed
2	5	siHTT_glial_mHTT	13.1155	speed		5	7	siHTT_glial_mHTT	11.408	speed		5	7	siHTT_glial_mHTT	11.408	speed		5	E06	7	siHTT_glial_mHTT	11.408	speed
2	6	siHTT_glial_mHTT	13.2336	speed		6	5	siHTT_glial_mHTT	13.2561	speed		6	5	siHTT_glial_mHTT	13.2561	speed		6	A02	5	siHTT_glial_mHTT	13.2561	speed
2	7	siHTT_glial_mHTT	11.8445	speed		6	6	siHTT_glial_mHTT	12.3061	speed		6	6	siHTT_glial_mHTT	12.3061	speed		6	D01	6	siHTT_glial_mHTT	12.3061	speed
2	8	siHTT_glial_mHTT	12.1505	speed		6	7	siHTT_glial_mHTT	11.9249	speed		6	7	siHTT_glial_mHTT	11.9249	speed		6	E06	7	siHTT_glial_mHTT	11.9249	speed
3	4	siHTT_glial_mHTT	13.8722	speed		7	5	siHTT_glial_mHTT	12.5336	speed		7	5	siHTT_glial_mHTT	12.5336	speed		7	A02	5	siHTT_glial_mHTT	12.5336	speed
3	5	siHTT_glial_mHTT	13.3553	speed		7	6	siHTT_glial_mHTT	11.9912	speed		7	6	siHTT_glial_mHTT	11.9912	speed		7	D01	6	siHTT_glial_mHTT	11.9912	speed
3	6	siHTT_glial_mHTT	12.6795	speed		7	7	siHTT_glial_mHTT	11.0928	speed		7	7	siHTT_glial_mHTT	11.0928	speed		7	E06	7	siHTT_glial_mHTT	11.0928	speed
3	7	siHTT_glial_mHTT	12.2869	speed		8	5	siHTT_glial_mHTT	12.2642	speed		8	5	siHTT_glial_mHTT	12.2642	speed		8	A02	5	siHTT_glial_mHTT	12.2642	speed
3	8	siHTT_glial_mHTT	12.6874	speed		8	6	siHTT_glial_mHTT	14.0586	speed		8	6	siHTT_glial_mHTT	14.0586	speed		8	D01	6	siHTT_glial_mHTT	14.0586	speed
4	4	siHTT_glial_mHTT	12.913	speed		8	7	siHTT_glial_mHTT	11.0016	speed		8	7	siHTT_glial_mHTT	11.0016	speed		8	E06	7	siHTT_glial_mHTT	11.0016	speed
4	5	siHTT_glial_mHTT	12.3921	speed		9	5	siHTT_glial_mHTT	9.9565	speed		9	5	siHTT_glial_mHTT	9.9565	speed		9	A02	5	siHTT_glial_mHTT	9.9565	speed
4	6	siHTT_glial_mHTT	11.0439	speed		9	6	siHTT_glial_mHTT	12.5028	speed		9	6	siHTT_glial_mHTT	12.5028	speed		9	D01	6	siHTT_glial_mHTT	12.5028	speed
4	7	siHTT_glial_mHTT	10.6887	speed		9	7	siHTT_glial_mHTT	9.82817	speed		9	7	siHTT_glial_mHTT	9.82817	speed		9	E06	7	siHTT_glial_mHTT	9.82817	speed
4	8	siHTT_glial_mHTT	11.7876	speed		1	1	57970 glial_mHTT	10.0265	speed		1	1	59465 glial_mHTT	10.7353	speed		1	A06	1	61716 glial_mHTT	11.2802	speed
5	4	siHTT_glial_mHTT	11.9177	speed		1	2	57970 glial_mHTT	9.88696	speed		1	2	59465 glial_mHTT	11.9651	speed		1	B05	2	61716 glial_mHTT	11.309	speed
5	5	siHTT_glial_mHTT	12.4605	speed		1	3	57970 glial_mHTT	10.7786	speed		1	3	59465 glial_mHTT	11.354	speed		1	C01	3	61716 glial_mHTT	11.8391	speed
5	6	siHTT_glial_mHTT	11.0883	speed		1	4	57970 glial_mHTT	11.3273	speed		1	4	59465 glial_mHTT	11.0013	speed		1	C03	4	61716 glial_mHTT	11.1542	speed
5	7	siHTT_glial_mHTT	11.2689	speed		1	5	57970 glial_mHTT	10.9273	speed		2	1	59465 glial_mHTT	12.1541	speed		1	C07	5	61716 glial_mHTT	11.2383	speed
5	8	siHTT_glial_mHTT	11.3274	speed		2	1	57970 glial_mHTT	11.1592	speed		2	2	59465 glial_mHTT	12.9862	speed		2	A06	1	61716 glial_mHTT	7.69095	speed
6	4	siHTT_glial_mHTT	11.056	speed		2	2	57970 glial_mHTT	12.5971	speed		2	3	59465 glial_mHTT	12.6349	speed		2	B05	2	61716 glial_mHTT	12.4131	speed
6	5	siHTT_glial_mHTT	11.9035	speed		2	3	57970 glial_mHTT	12.1991	speed		2	4	59465 glial_mHTT	12.8332	speed		2	C01	3	61716 glial_mHTT	11.9712	speed
6	6	siHTT_glial_mHTT	10.2836	speed		2	4	57970 glial_mHTT	12.3278	speed		3	1	59465 glial_mHTT	11.6647	speed		2	C03	4	61716 glial_mHTT	11.94	speed
6	7	siHTT_glial_mHTT	11.5262	speed		2	5	57970 glial_mHTT	11.0724	speed		3	2	59465 glial_mHTT	12.1314	speed		2	C07	5	61716 glial_mHTT	3.28609	speed
6	8	siHTT_glial_mHTT	13.6128	speed		3	1	57970 glial_mHTT	13.0534	speed		3	3	59465 glial_mHTT	12.3412	speed		3	A06	1	61716 glial_mHTT	11.7766	speed
7	4	siHTT_glial_mHTT	10.765	speed		3	2	57970 glial_mHTT	10.8132	speed		3	4	59465 glial_mHTT	12.9529	speed		3	B05	2	61716 glial_mHTT	13.0413	speed
7	5	siHTT_glial_mHTT	11.6304	speed		3	3	57970 glial_mHTT	13.4342	speed		4	1	59465 glial_mHTT	11.9595	speed		3	C01	3	61716 glial_mHTT	12.9817	speed
7	6	siHTT_glial_mHTT	8.73746	speed		3	4	57970 glial_mHTT	12.3036	speed		4	2	59465 glial_mHTT	11.314	speed		3	C03	4	61716 glial_mHTT	13.2769	speed
7	7	siHTT_glial_mHTT	10.5596	speed		3	5	57970 glial_mHTT	13.2293	speed		4	3	59465 glial_mHTT	11.5254	speed		3	C07	5	61716 glial_mHTT	11.0265	speed
7	8	siHTT_glial_mHTT	9.94202	speed		4	1	57970 glial_mHTT	12.4769	speed		4	4	59465 glial_mHTT	11.6372	speed		4	A06	1	61716 glial_mHTT	12.9689	speed
8	4	siHTT_glial_mHTT	11.6355	speed		4	2	57970 glial_mHTT	13.1284	speed		5	1	59465 glial_mHTT	10.9285	speed		4	B05	2	61716 glial_mHTT	12.6422	speed
8	5	siHTT_glial_mHTT	12.9402	speed		4	3	57970 glial_mHTT	11.7644	speed		5	2	59465 glial_mHTT	9.98344	speed		4	C01	3	61716 glial_mHTT	12.733	speed
8	6	siHTT_glial_mHTT	10.6889	speed		4	4	57970 glial_mHTT	13.6716	speed		5	3	59465 glial_mHTT	11.2073	speed		4	C03	4	61716 glial_mHTT	12.191	speed
8	7	siHTT_glial_mHTT	9.80732	speed		4	5	57970 glial_mHTT	12.618	speed		5	4	59465 glial_mHTT	12.2686	speed		4	C07	5	61716 glial_mHTT	13.2045	speed
8	8	siHTT_glial_mHTT	11.5471	speed		5	1	57970 glial_mHTT	9.17785	speed		6	1	59465 glial_mHTT	10.3785	speed		5	A06	1	61716 glial_mHTT	10.1472	speed
9	4	siHTT_glial_mHTT	11.4795	speed		5	2	57970 glial_mHTT	11.2471	speed		6	2	59465 glial_mHTT	10.366	speed		5	B05	2	61716 glial_mHTT	10.1205	speed
9	5	siHTT_glial_mHTT	12.4085	speed		5	3	57970 glial_mHTT	11.5894	speed		6	3	59465 glial_mHTT	10.2656	speed		5	C01	3	61716 glial_mHTT	7.862	speed
9	6	siHTT_glial_mHTT	9.7591	speed		5	4	57970 glial_mHTT	11.2696	speed		6	4	59465 glial_mHTT	11.7415	speed		5	C03	4	61716 glial_mHTT	10.5015	speed
9	7	siHTT_glial_mHTT	10.2836	speed		5	5	57970 glial_mHTT	11.4608	speed		7	1	59465 glial_mHTT	7.86878	speed		5	C07	5	61716 glial_mHTT	9.73005	speed
9	8	siHTT_glial_mHTT	11.8668	speed		6	1	57970 glial_mHTT	10.2687	speed		7	2	59465 glial_mHTT	7.09124	speed		6	A06	1	61716 glial_mHTT	9.89278	speed
10	4	siHTT_glial_mHTT	13.3354	speed		6	2	57970 glial_mHTT	11.5407	speed		7	3	59465 glial_mHTT	6.63796	speed		6	B05	2	61716 glial_mHTT	9.65132	speed
10	5	siHTT_glial_mHTT	9.84851	speed		6	3	57970 glial_mHTT	12.8868	speed		7	4	59465 glial_mHTT	6.85486	speed		6	C01	3	61716 glial_mHTT	9.18496	speed
10	6	siHTT_glial_mHTT	12.4092	speed		6	4	57970 glial_mHTT	10.9503	speed		8	1	59465 glial_mHTT	6.6369	speed		6	C03	4	61716 glial_mHTT	9.82897	speed
10	7	siHTT_glial_mHTT	11.8995	speed		6	5	57970 glial_mHTT	11.155	speed		8	2	59465 glial_mHTT	8.71097	speed		6	C07	5	61716 glial_mHTT	9.39877	speed
10	8	siHTT_glial_mHTT	13.2458	speed		7	1	57970 glial_mHTT	10.042	speed		8	3	59465 glial_mHTT	3.7118	speed		7	A06	1	61716 glial_mHTT	7.78308	speed
2	1	20232 glial_mHTT	15.3699	speed		7	2	57970 glial_mHTT	10.188	speed		8	4	59465 glial_mHTT	6.68802	speed		7	B05	2	61716 glial_mHTT	7.29357	speed
2	2	20232 glial_mHTT	15.5664	speed		7	3	57970 glial_mHTT	7.61286	speed		9	1	59465 glial_mHTT	7.16317	speed		7	C01	3	61716 glial_mHTT	9.69171	speed
2	3	20232 glial_mHTT	14.2136	speed		7	4	57970 glial_mHTT	9.34749	speed		9	2	59465 glial_mHTT	8.62952	speed		7	C03	4	61716 glial_mHTT	8.1702	speed
2	4	20232 glial_mHTT	12.7091	speed		7	5	57970 glial_mHTT	8.3899	speed		9	3	59465 glial_mHTT	5.78798	speed		7	C07	5	61716 glial_mHTT	5.87729	speed
2	5	20232 glial_mHTT	13.1053	speed		8	1	57970 glial_mHTT	8.57111	speed		9	4	59465 glial_mHTT	7.71533	speed		8	A06	1	61716 glial_mHTT	8.12951	speed
3	1	20232 glial_mHTT	13.8805	speed		8	2	57970 glial_mHTT	8.86847	speed								8	B05	2	61716 glial_mHTT	7.34825	speed
3	2	20232 glial_mHTT	13.9834	speed		8	3	57970 glial_mHTT	9.1233	speed								8	C01	3	61716 glial_mHTT	8.08686	speed
3	3	20232 glial_mHTT	14.6843	speed		8	4	57970 glial_mHTT	8.95952	speed								8	C03	4	61716 glial_mHTT	6.20372	speed
3	4	20232 glial_mHTT	13.3086	speed		8	5	57970 glial_mHTT	8.95976	speed								8	C07	5	61716 glial_mHTT	7.07696	speed
3	5	20232 glial_mHTT	14.6505	speed		9	1	57970 glial_mHTT	8.21551	speed								9	A06	1	61716 glial_mHTT	10.0865	speed
4	1	20232 glial_mHTT	12.9536	speed		9	2	57970 glial_mHTT	9.30295	speed								9	B05	2	61716 glial_mHTT	8.37301	speed
4	2	20232 glial_mHTT	10.897	speed		9	3	57970 glial_mHTT	10.0097	speed								9	C01	3	61716 glial_mHTT	8.20777	speed
4	3	20232 glial_mHTT	9.30328	speed		9	4	57970 glial_mHTT	8.04046	speed								9	C03	4	61716 glial_mHTT	8.16647	speed
4	4	20232 glial_mHTT	9.3581	speed		9	5	57970 glial_mHTT	8.5264	speed								9	C07	5	61716 glial_mHTT	7.76283	speed
4	5	20232 glial_mHTT	10.1591	speed
5	1	20232 glial_mHTT	10.2299	speed
5	2	20232 glial_mHTT	11.8828	speed
5	3	20232 glial_mHTT	10.7414	speed
5	4	20232 glial_mHTT	12.1138	speed
5	5	20232 glial_mHTT	12.0643	speed
6	1	20232 glial_mHTT	11.3189	speed
6	2	20232 glial_mHTT	8.47671	speed
6	3	20232 glial_mHTT	11.9594	speed
6	4	20232 glial_mHTT	10.3246	speed
6	5	20232 glial_mHTT	11.4938	speed
7	1	20232 glial_mHTT	6.54475	speed
7	2	20232 glial_mHTT	6.70528	speed
7	3	20232 glial_mHTT	6.64003	speed
7	4	20232 glial_mHTT	8.58286	speed
7	5	20232 glial_mHTT	5.96333	speed
8	1	20232 glial_mHTT	7.33208	speed
8	2	20232 glial_mHTT	6.82245	speed
8	3	20232 glial_mHTT	7.25168	speed
8	4	20232 glial_mHTT	8.1245	speed
8	5	20232 glial_mHTT	8.11188	speed
9	1	20232 glial_mHTT	8.57863	speed
9	2	20232 glial_mHTT	7.73155	speed
9	3	20232 glial_mHTT	7.66593	speed
9	4	20232 glial_mHTT	5.7322	speed
9	5	20232 glial_mHTT	7.3881	speed
10	1	20232 glial_mHTT	7.08575	speed
10	2	20232 glial_mHTT	5.67224	speed
10	3	20232 glial_mHTT	6.05938	speed
10	4	20232 glial_mHTT	5.11855	speed
10	5	20232 glial_mHTT	3.86501	speed

## Sheet: EPB41
cora BDSC 52232
Trialday	Pos	Replicate	Genotype	Observation	Metric
1	A01	1	Non_targeting_hpRNA_glial_mHTT	12.186	speed
1	B02	2	Non_targeting_hpRNA_glial_mHTT	12.7909	speed
2	A01	1	Non_targeting_hpRNA_glial_mHTT	11.6151	speed
2	B02	2	Non_targeting_hpRNA_glial_mHTT	12.1219	speed
3	A01	1	Non_targeting_hpRNA_glial_mHTT	9.94744	speed
3	B02	2	Non_targeting_hpRNA_glial_mHTT	11.7971	speed
4	A01	1	Non_targeting_hpRNA_glial_mHTT	9.85299	speed
4	B02	2	Non_targeting_hpRNA_glial_mHTT	10.6864	speed
5	A01	1	Non_targeting_hpRNA_glial_mHTT	5.32302	speed
5	B02	2	Non_targeting_hpRNA_glial_mHTT	10.4062	speed
6	A01	1	Non_targeting_hpRNA_glial_mHTT	1.35658	speed
6	B02	2	Non_targeting_hpRNA_glial_mHTT	6.91932	speed
7	A01	1	Non_targeting_hpRNA_glial_mHTT	8.64577	speed
7	B02	2	Non_targeting_hpRNA_glial_mHTT	8.6402	speed
8	A01	1	Non_targeting_hpRNA_glial_mHTT	5.00066	speed
8	B02	2	Non_targeting_hpRNA_glial_mHTT	6.39159	speed
1	A01	3	Non_targeting_hpRNA_glial_mHTT	11.5646	speed
1	C02	4	Non_targeting_hpRNA_glial_mHTT	10.6456	speed
1	G02	5	Non_targeting_hpRNA_glial_mHTT	8.89028	speed
2	A01	3	Non_targeting_hpRNA_glial_mHTT	9.55612	speed
2	C02	4	Non_targeting_hpRNA_glial_mHTT	12.9619	speed
2	G02	5	Non_targeting_hpRNA_glial_mHTT	12.984	speed
3	A01	3	Non_targeting_hpRNA_glial_mHTT	9.64493	speed
3	C02	4	Non_targeting_hpRNA_glial_mHTT	12.1723	speed
3	G02	5	Non_targeting_hpRNA_glial_mHTT	10.8503	speed
4	A01	3	Non_targeting_hpRNA_glial_mHTT	7.78815	speed
4	C02	4	Non_targeting_hpRNA_glial_mHTT	6.44811	speed
4	G02	5	Non_targeting_hpRNA_glial_mHTT	10.727	speed
5	A01	3	Non_targeting_hpRNA_glial_mHTT	7.63764	speed
5	C02	4	Non_targeting_hpRNA_glial_mHTT	9.00362	speed
5	G02	5	Non_targeting_hpRNA_glial_mHTT	6.61344	speed
6	A01	3	Non_targeting_hpRNA_glial_mHTT	7.03368	speed
6	C02	4	Non_targeting_hpRNA_glial_mHTT	8.17837	speed
6	G02	5	Non_targeting_hpRNA_glial_mHTT	4.80799	speed
7	A01	3	Non_targeting_hpRNA_glial_mHTT	3.50538	speed
7	C02	4	Non_targeting_hpRNA_glial_mHTT	5.17438	speed
7	G02	5	Non_targeting_hpRNA_glial_mHTT	1.83189	speed
8	A01	3	Non_targeting_hpRNA_glial_mHTT	5.40236	speed
8	C02	4	Non_targeting_hpRNA_glial_mHTT	4.93599	speed
8	G02	5	Non_targeting_hpRNA_glial_mHTT	5.66823	speed
9	A01	3	Non_targeting_hpRNA_glial_mHTT	2.16147	speed
9	C02	4	Non_targeting_hpRNA_glial_mHTT	2.57011	speed
9	G02	5	Non_targeting_hpRNA_glial_mHTT	1.9203	speed
1	A01	6	Non_targeting_hpRNA_glial_mHTT	10.9354	speed
2	A01	6	Non_targeting_hpRNA_glial_mHTT	11.6443	speed
3	A01	6	Non_targeting_hpRNA_glial_mHTT	13.4473	speed
4	A01	6	Non_targeting_hpRNA_glial_mHTT	9.2254	speed
5	A01	6	Non_targeting_hpRNA_glial_mHTT	11.5363	speed
6	A01	6	Non_targeting_hpRNA_glial_mHTT	4.02543	speed
7	A01	6	Non_targeting_hpRNA_glial_mHTT	2.12227	speed
8	A01	6	Non_targeting_hpRNA_glial_mHTT	4.74043	speed
9	A01	6	Non_targeting_hpRNA_glial_mHTT	4.6059	speed
1	A02	1	siHTT_glial_mHTT	12.5356	speed
1	C02	2	siHTT_glial_mHTT	11.4488	speed
2	A02	1	siHTT_glial_mHTT	12.1656	speed
2	C02	2	siHTT_glial_mHTT	13.2191	speed
3	A02	1	siHTT_glial_mHTT	13.6606	speed
3	C02	2	siHTT_glial_mHTT	11.9763	speed
4	A02	1	siHTT_glial_mHTT	13.0399	speed
4	C02	2	siHTT_glial_mHTT	10.0979	speed
5	A02	1	siHTT_glial_mHTT	13.4475	speed
5	C02	2	siHTT_glial_mHTT	11.978	speed
6	A02	1	siHTT_glial_mHTT	13.5401	speed
6	C02	2	siHTT_glial_mHTT	11.5133	speed
7	A02	1	siHTT_glial_mHTT	12.4868	speed
7	C02	2	siHTT_glial_mHTT	12.7704	speed
8	A02	1	siHTT_glial_mHTT	11.8278	speed
8	C02	2	siHTT_glial_mHTT	13.1025	speed
1	A02	2	siHTT_glial_mHTT	10.2567	speed
1	D09	3	siHTT_glial_mHTT	9.56936	speed
1	F08	4	siHTT_glial_mHTT	11.8178	speed
2	A02	2	siHTT_glial_mHTT	12.7563	speed
2	D09	3	siHTT_glial_mHTT	13.1716	speed
2	F08	4	siHTT_glial_mHTT	13.6013	speed
3	A02	2	siHTT_glial_mHTT	14.3955	speed
3	D09	3	siHTT_glial_mHTT	12.5809	speed
3	F08	4	siHTT_glial_mHTT	13.2191	speed
4	A02	2	siHTT_glial_mHTT	13.2839	speed
4	D09	3	siHTT_glial_mHTT	13.8132	speed
4	F08	4	siHTT_glial_mHTT	12.4869	speed
5	A02	2	siHTT_glial_mHTT	13.31	speed
5	D09	3	siHTT_glial_mHTT	10.8609	speed
5	F08	4	siHTT_glial_mHTT	13.15	speed
6	A02	2	siHTT_glial_mHTT	10.7814	speed
6	D09	3	siHTT_glial_mHTT	14.081	speed
6	F08	4	siHTT_glial_mHTT	13.5522	speed
7	A02	2	siHTT_glial_mHTT	12.7851	speed
7	D09	3	siHTT_glial_mHTT	12.3284	speed
7	F08	4	siHTT_glial_mHTT	11.6353	speed
8	A02	2	siHTT_glial_mHTT	12.551	speed
8	D09	3	siHTT_glial_mHTT	12.3522	speed
8	F08	4	siHTT_glial_mHTT	11.9198	speed
9	A02	2	siHTT_glial_mHTT	12.8324	speed
9	D09	3	siHTT_glial_mHTT	12.288	speed
9	F08	4	siHTT_glial_mHTT	11.3166	speed
1	A02	5	siHTT_glial_mHTT	11.3322	speed
1	D01	6	siHTT_glial_mHTT	11.6054	speed
1	E06	7	siHTT_glial_mHTT	10.7686	speed
2	A02	5	siHTT_glial_mHTT	11.9043	speed
2	D01	6	siHTT_glial_mHTT	11.5123	speed
2	E06	7	siHTT_glial_mHTT	5.13955	speed
3	A02	5	siHTT_glial_mHTT	14.1215	speed
3	D01	6	siHTT_glial_mHTT	14.713	speed
3	E06	7	siHTT_glial_mHTT	12.4855	speed
4	A02	5	siHTT_glial_mHTT	13.1075	speed
4	D01	6	siHTT_glial_mHTT	12.9115	speed
4	E06	7	siHTT_glial_mHTT	13.2786	speed
5	A02	5	siHTT_glial_mHTT	12.6432	speed
5	D01	6	siHTT_glial_mHTT	10.2839	speed
5	E06	7	siHTT_glial_mHTT	11.408	speed
6	A02	5	siHTT_glial_mHTT	13.2561	speed
6	D01	6	siHTT_glial_mHTT	12.3061	speed
6	E06	7	siHTT_glial_mHTT	11.9249	speed
7	A02	5	siHTT_glial_mHTT	12.5336	speed
7	D01	6	siHTT_glial_mHTT	11.9912	speed
7	E06	7	siHTT_glial_mHTT	11.0928	speed
8	A02	5	siHTT_glial_mHTT	12.2642	speed
8	D01	6	siHTT_glial_mHTT	14.0586	speed
8	E06	7	siHTT_glial_mHTT	11.0016	speed
9	A02	5	siHTT_glial_mHTT	9.9565	speed
9	D01	6	siHTT_glial_mHTT	12.5028	speed
9	E06	7	siHTT_glial_mHTT	9.82817	speed
1	E04	1	52232_ glial_mHTT	12.9	speed
1	F05	2	52232_ glial_mHTT	13.2035	speed
1	G01	3	52232_ glial_mHTT	11.7487	speed
1	G07	4	52232_ glial_mHTT	13.1055	speed
1	H02	5	52232_ glial_mHTT	11.9967	speed
1	H06	6	52232_ glial_mHTT	12.7741	speed
2	E04	1	52232_ glial_mHTT	13.2693	speed
2	F05	2	52232_ glial_mHTT	12.7568	speed
2	G01	3	52232_ glial_mHTT	9.13444	speed
2	G07	4	52232_ glial_mHTT	12.9212	speed
2	H02	5	52232_ glial_mHTT	5.06899	speed
2	H06	6	52232_ glial_mHTT	12.627	speed
3	E04	1	52232_ glial_mHTT	14.3342	speed
3	F05	2	52232_ glial_mHTT	13.887	speed
3	G01	3	52232_ glial_mHTT	15.4792	speed
3	G07	4	52232_ glial_mHTT	12.5264	speed
3	H02	5	52232_ glial_mHTT	13.2338	speed
3	H06	6	52232_ glial_mHTT	13.24	speed
4	E04	1	52232_ glial_mHTT	14.4373	speed
4	F05	2	52232_ glial_mHTT	14.3544	speed
4	G01	3	52232_ glial_mHTT	14.6879	speed
4	G07	4	52232_ glial_mHTT	14.7163	speed
4	H02	5	52232_ glial_mHTT	13.0834	speed
4	H06	6	52232_ glial_mHTT	11.6883	speed
5	E04	1	52232_ glial_mHTT	12.6166	speed
5	F05	2	52232_ glial_mHTT	13.4496	speed
5	G01	3	52232_ glial_mHTT	12.6614	speed
5	G07	4	52232_ glial_mHTT	13.1717	speed
5	H02	5	52232_ glial_mHTT	11.4621	speed
5	H06	6	52232_ glial_mHTT	10.1837	speed
6	E04	1	52232_ glial_mHTT	10.3615	speed
6	F05	2	52232_ glial_mHTT	12.2424	speed
6	G01	3	52232_ glial_mHTT	11.1239	speed
6	G07	4	52232_ glial_mHTT	11.9397	speed
6	H02	5	52232_ glial_mHTT	12.3331	speed
6	H06	6	52232_ glial_mHTT	10.1292	speed
7	E04	1	52232_ glial_mHTT	7.31548	speed
7	F05	2	52232_ glial_mHTT	12.0965	speed
7	G01	3	52232_ glial_mHTT	9.32569	speed
7	G07	4	52232_ glial_mHTT	8.874	speed
7	H02	5	52232_ glial_mHTT	9.152	speed
7	H06	6	52232_ glial_mHTT	6.69127	speed
8	E04	1	52232_ glial_mHTT	9.96585	speed
8	F05	2	52232_ glial_mHTT	10.6608	speed
8	G01	3	52232_ glial_mHTT	10.2208	speed
8	G07	4	52232_ glial_mHTT	10.5474	speed
8	H02	5	52232_ glial_mHTT	9.84642	speed
8	H06	6	52232_ glial_mHTT	8.7956	speed
9	E04	1	52232_ glial_mHTT	8.60234	speed
9	F05	2	52232_ glial_mHTT	11.5195	speed
9	G01	3	52232_ glial_mHTT	7.18499	speed
9	G07	4	52232_ glial_mHTT	10.0108	speed
9	H02	5	52232_ glial_mHTT	9.69316	speed
9	H06	6	52232_ glial_mHTT	7.14177	speed

## Sheet: GRM1 GRM5
mGluR VDRC 1793						mtt BDSC 34116						mtt BDSC 44822						mtt VDRC 330081
Trialday	Replicate	Replicate	Observation	Metric		Trialday	Replicate	Genotype	Observation	Metric		Trialday	Replicate	Genotype	Observation	Metric		Trialday	Replicate	Genotype	Observation	Metric
1	siHTT_glial_mHTT_glial_mHTT	1	13.3122	speed		2	1	Non_targeting_hpRNA_glial_mHTT	14.2278	speed		1	1	Non_targeting_hpRNA_glial_mHTT	12.186	speed		1	1	siHTT_glial_mHTT	13.1737	speed
1	siHTT_glial_mHTT_glial_mHTT	2	11.6686	speed		2	2	Non_targeting_hpRNA_glial_mHTT	15.5571	speed		1	2	Non_targeting_hpRNA_glial_mHTT	12.7909	speed		1	2	siHTT_glial_mHTT	13.7364	speed
1	siHTT_glial_mHTT_glial_mHTT	3	13.6587	speed		2	3	Non_targeting_hpRNA_glial_mHTT	14.5411	speed		2	1	Non_targeting_hpRNA_glial_mHTT	11.6151	speed		1	3	siHTT_glial_mHTT	14.8899	speed
1	siHTT_glial_mHTT_glial_mHTT	4	11.6759	speed		3	1	Non_targeting_hpRNA_glial_mHTT	12.1723	speed		2	2	Non_targeting_hpRNA_glial_mHTT	12.1219	speed		1	4	siHTT_glial_mHTT	12.4146	speed
1	siHTT_glial_mHTT_glial_mHTT	5	12.7464	speed		3	2	Non_targeting_hpRNA_glial_mHTT	12.2934	speed		3	1	Non_targeting_hpRNA_glial_mHTT	9.94744	speed		2	1	siHTT_glial_mHTT	12.6548	speed
1	siHTT_glial_mHTT_glial_mHTT	6	11.0488	speed		3	3	Non_targeting_hpRNA_glial_mHTT	9.53973	speed		3	2	Non_targeting_hpRNA_glial_mHTT	11.7971	speed		2	2	siHTT_glial_mHTT	13.3211	speed
2	siHTT_glial_mHTT_glial_mHTT	1	13.0029	speed		4	1	Non_targeting_hpRNA_glial_mHTT	8.78102	speed		4	1	Non_targeting_hpRNA_glial_mHTT	9.85299	speed		2	3	siHTT_glial_mHTT	13.4628	speed
2	siHTT_glial_mHTT_glial_mHTT	2	12.3716	speed		4	2	Non_targeting_hpRNA_glial_mHTT	10.7369	speed		4	2	Non_targeting_hpRNA_glial_mHTT	10.6864	speed		2	4	siHTT_glial_mHTT	13.8116	speed
2	siHTT_glial_mHTT_glial_mHTT	3	12.7349	speed		4	3	Non_targeting_hpRNA_glial_mHTT	9.95084	speed		5	1	Non_targeting_hpRNA_glial_mHTT	5.32302	speed		3	1	siHTT_glial_mHTT	12.453	speed
2	siHTT_glial_mHTT_glial_mHTT	4	12.213	speed		5	1	Non_targeting_hpRNA_glial_mHTT	5.73557	speed		5	2	Non_targeting_hpRNA_glial_mHTT	10.4062	speed		3	2	siHTT_glial_mHTT	13.5477	speed
2	siHTT_glial_mHTT_glial_mHTT	5	14.8197	speed		5	2	Non_targeting_hpRNA_glial_mHTT	9.92094	speed		6	1	Non_targeting_hpRNA_glial_mHTT	1.35658	speed		3	3	siHTT_glial_mHTT	13.5887	speed
2	siHTT_glial_mHTT_glial_mHTT	6	10.9503	speed		5	3	Non_targeting_hpRNA_glial_mHTT	10.0181	speed		6	2	Non_targeting_hpRNA_glial_mHTT	6.91932	speed		3	4	siHTT_glial_mHTT	14.3908	speed
4	siHTT_glial_mHTT_glial_mHTT	1	12.4247	speed		6	1	Non_targeting_hpRNA_glial_mHTT	4.91453	speed		7	1	Non_targeting_hpRNA_glial_mHTT	8.64577	speed		4	1	siHTT_glial_mHTT	11.4225	speed
4	siHTT_glial_mHTT_glial_mHTT	2	13.7301	speed		6	2	Non_targeting_hpRNA_glial_mHTT	9.42369	speed		7	2	Non_targeting_hpRNA_glial_mHTT	8.6402	speed		4	2	siHTT_glial_mHTT	10.0427	speed
4	siHTT_glial_mHTT_glial_mHTT	3	14.1575	speed		6	3	Non_targeting_hpRNA_glial_mHTT	9.29628	speed		8	1	Non_targeting_hpRNA_glial_mHTT	5.00066	speed		4	3	siHTT_glial_mHTT	13.5401	speed
4	siHTT_glial_mHTT_glial_mHTT	4	12.933	speed		7	1	Non_targeting_hpRNA_glial_mHTT	4.65538	speed		8	2	Non_targeting_hpRNA_glial_mHTT	6.39159	speed		4	4	siHTT_glial_mHTT	12.1594	speed
4	siHTT_glial_mHTT_glial_mHTT	5	13.5358	speed		7	2	Non_targeting_hpRNA_glial_mHTT	4.87125	speed		1	3	Non_targeting_hpRNA_glial_mHTT	11.5646	speed		5	1	siHTT_glial_mHTT	11.6772	speed
4	siHTT_glial_mHTT_glial_mHTT	6	11.5752	speed		7	3	Non_targeting_hpRNA_glial_mHTT	8.14019	speed		1	4	Non_targeting_hpRNA_glial_mHTT	10.6456	speed		5	2	siHTT_glial_mHTT	12.8844	speed
5	siHTT_glial_mHTT_glial_mHTT	1	5.12724	speed		8	1	Non_targeting_hpRNA_glial_mHTT	3.44567	speed		1	5	Non_targeting_hpRNA_glial_mHTT	8.89028	speed		5	3	siHTT_glial_mHTT	12.7707	speed
5	siHTT_glial_mHTT_glial_mHTT	2	10.6049	speed		8	2	Non_targeting_hpRNA_glial_mHTT	5.02795	speed		2	3	Non_targeting_hpRNA_glial_mHTT	9.55612	speed		5	4	siHTT_glial_mHTT	13.3335	speed
5	siHTT_glial_mHTT_glial_mHTT	3	8.95377	speed		8	3	Non_targeting_hpRNA_glial_mHTT	4.10722	speed		2	4	Non_targeting_hpRNA_glial_mHTT	12.9619	speed		6	1	siHTT_glial_mHTT	11.276	speed
5	siHTT_glial_mHTT_glial_mHTT	4	6.43981	speed		9	1	Non_targeting_hpRNA_glial_mHTT	6.6524	speed		2	5	Non_targeting_hpRNA_glial_mHTT	12.984	speed		6	2	siHTT_glial_mHTT	11.919	speed
5	siHTT_glial_mHTT_glial_mHTT	5	6.10097	speed		9	2	Non_targeting_hpRNA_glial_mHTT	7.84532	speed		3	3	Non_targeting_hpRNA_glial_mHTT	9.64493	speed		6	3	siHTT_glial_mHTT	13.6717	speed
5	siHTT_glial_mHTT_glial_mHTT	6	8.13897	speed		9	3	Non_targeting_hpRNA_glial_mHTT	7.73044	speed		3	4	Non_targeting_hpRNA_glial_mHTT	12.1723	speed		6	4	siHTT_glial_mHTT	12.2782	speed
6	siHTT_glial_mHTT_glial_mHTT	1	3.74746	speed		10	1	Non_targeting_hpRNA_glial_mHTT	3.7822	speed		3	5	Non_targeting_hpRNA_glial_mHTT	10.8503	speed		7	1	siHTT_glial_mHTT	12.5513	speed
6	siHTT_glial_mHTT_glial_mHTT	2	3.49082	speed		10	2	Non_targeting_hpRNA_glial_mHTT	3.05975	speed		4	3	Non_targeting_hpRNA_glial_mHTT	7.78815	speed		7	2	siHTT_glial_mHTT	14.3595	speed
6	siHTT_glial_mHTT_glial_mHTT	3	5.40005	speed		10	3	Non_targeting_hpRNA_glial_mHTT	6.99881	speed		4	4	Non_targeting_hpRNA_glial_mHTT	6.44811	speed		7	3	siHTT_glial_mHTT	12.7392	speed
6	siHTT_glial_mHTT_glial_mHTT	4	5.20276	speed		2	4	Non_targeting_hpRNA_glial_mHTT	11.6946	speed		4	5	Non_targeting_hpRNA_glial_mHTT	10.727	speed		7	4	siHTT_glial_mHTT	13.6289	speed
6	siHTT_glial_mHTT_glial_mHTT	5	4.46381	speed		2	5	Non_targeting_hpRNA_glial_mHTT	12.322	speed		5	3	Non_targeting_hpRNA_glial_mHTT	7.63764	speed		1	1	Non_targeting_hpRNA_glial_mHTT	14.1308	speed
6	siHTT_glial_mHTT_glial_mHTT	6	4.76473	speed		2	6	Non_targeting_hpRNA_glial_mHTT	11.7243	speed		5	4	Non_targeting_hpRNA_glial_mHTT	9.00362	speed		1	2	Non_targeting_hpRNA_glial_mHTT	14.4091	speed
7	siHTT_glial_mHTT_glial_mHTT	1	7.57562	speed		2	7	Non_targeting_hpRNA_glial_mHTT	11.9576	speed		5	5	Non_targeting_hpRNA_glial_mHTT	6.61344	speed		1	3	Non_targeting_hpRNA_glial_mHTT	12.7327	speed
7	siHTT_glial_mHTT_glial_mHTT	2	3.93167	speed		2	8	Non_targeting_hpRNA_glial_mHTT	10.4241	speed		6	3	Non_targeting_hpRNA_glial_mHTT	7.03368	speed		1	4	Non_targeting_hpRNA_glial_mHTT	11.2516	speed
7	siHTT_glial_mHTT_glial_mHTT	3	8.81004	speed		2	9	Non_targeting_hpRNA_glial_mHTT	11.88	speed		6	4	Non_targeting_hpRNA_glial_mHTT	8.17837	speed		1	5	Non_targeting_hpRNA_glial_mHTT	12.4284	speed
7	siHTT_glial_mHTT_glial_mHTT	4	8.24559	speed		3	4	Non_targeting_hpRNA_glial_mHTT	11.9101	speed		6	5	Non_targeting_hpRNA_glial_mHTT	4.80799	speed		2	1	Non_targeting_hpRNA_glial_mHTT	13.6557	speed
7	siHTT_glial_mHTT_glial_mHTT	5	8.81476	speed		3	5	Non_targeting_hpRNA_glial_mHTT	12.1479	speed		7	3	Non_targeting_hpRNA_glial_mHTT	3.50538	speed		2	2	Non_targeting_hpRNA_glial_mHTT	12.8554	speed
7	siHTT_glial_mHTT_glial_mHTT	6	5.22917	speed		3	6	Non_targeting_hpRNA_glial_mHTT	12.3648	speed		7	4	Non_targeting_hpRNA_glial_mHTT	5.17438	speed		2	3	Non_targeting_hpRNA_glial_mHTT	12.3719	speed
8	siHTT_glial_mHTT_glial_mHTT	1	11.6578	speed		3	7	Non_targeting_hpRNA_glial_mHTT	13.3803	speed		7	5	Non_targeting_hpRNA_glial_mHTT	1.83189	speed		2	4	Non_targeting_hpRNA_glial_mHTT	11.8132	speed
8	siHTT_glial_mHTT_glial_mHTT	2	10.8995	speed		3	8	Non_targeting_hpRNA_glial_mHTT	10.8529	speed		8	3	Non_targeting_hpRNA_glial_mHTT	5.40236	speed		2	5	Non_targeting_hpRNA_glial_mHTT	12.2618	speed
8	siHTT_glial_mHTT_glial_mHTT	3	9.89852	speed		3	9	Non_targeting_hpRNA_glial_mHTT	11.6781	speed		8	4	Non_targeting_hpRNA_glial_mHTT	4.93599	speed		3	1	Non_targeting_hpRNA_glial_mHTT	12.4942	speed
8	siHTT_glial_mHTT_glial_mHTT	4	8.89459	speed		4	4	Non_targeting_hpRNA_glial_mHTT	8.41563	speed		8	5	Non_targeting_hpRNA_glial_mHTT	5.66823	speed		3	2	Non_targeting_hpRNA_glial_mHTT	12.3112	speed
8	siHTT_glial_mHTT_glial_mHTT	5	12.3215	speed		4	5	Non_targeting_hpRNA_glial_mHTT	11.4763	speed		9	3	Non_targeting_hpRNA_glial_mHTT	2.16147	speed		3	3	Non_targeting_hpRNA_glial_mHTT	12.195	speed
8	siHTT_glial_mHTT_glial_mHTT	6	9.59154	speed		4	6	Non_targeting_hpRNA_glial_mHTT	10.7076	speed		9	4	Non_targeting_hpRNA_glial_mHTT	2.57011	speed		3	4	Non_targeting_hpRNA_glial_mHTT	8.42445	speed
9	siHTT_glial_mHTT_glial_mHTT	1	10.9614	speed		4	7	Non_targeting_hpRNA_glial_mHTT	10.2271	speed		9	5	Non_targeting_hpRNA_glial_mHTT	1.9203	speed		3	5	Non_targeting_hpRNA_glial_mHTT	10.9853	speed
9	siHTT_glial_mHTT_glial_mHTT	2	10.7935	speed		4	8	Non_targeting_hpRNA_glial_mHTT	10.6616	speed		1	6	Non_targeting_hpRNA_glial_mHTT	10.9354	speed		4	1	Non_targeting_hpRNA_glial_mHTT	9.27308	speed
9	siHTT_glial_mHTT_glial_mHTT	3	10.6921	speed		4	9	Non_targeting_hpRNA_glial_mHTT	10.7341	speed		2	6	Non_targeting_hpRNA_glial_mHTT	11.6443	speed		4	2	Non_targeting_hpRNA_glial_mHTT	8.77704	speed
9	siHTT_glial_mHTT_glial_mHTT	4	10.9358	speed		5	4	Non_targeting_hpRNA_glial_mHTT	7.73139	speed		3	6	Non_targeting_hpRNA_glial_mHTT	13.4473	speed		4	3	Non_targeting_hpRNA_glial_mHTT	8.64953	speed
9	siHTT_glial_mHTT_glial_mHTT	5	11.8793	speed		5	5	Non_targeting_hpRNA_glial_mHTT	8.67637	speed		4	6	Non_targeting_hpRNA_glial_mHTT	9.2254	speed		4	4	Non_targeting_hpRNA_glial_mHTT	5.95777	speed
9	siHTT_glial_mHTT_glial_mHTT	6	9.56928	speed		5	6	Non_targeting_hpRNA_glial_mHTT	8.29841	speed		5	6	Non_targeting_hpRNA_glial_mHTT	11.5363	speed		4	5	Non_targeting_hpRNA_glial_mHTT	8.71005	speed
10	siHTT_glial_mHTT_glial_mHTT	1	12.038	speed		5	7	Non_targeting_hpRNA_glial_mHTT	5.94291	speed		6	6	Non_targeting_hpRNA_glial_mHTT	4.02543	speed		5	1	Non_targeting_hpRNA_glial_mHTT	6.69956	speed
10	siHTT_glial_mHTT_glial_mHTT	2	11.9484	speed		5	8	Non_targeting_hpRNA_glial_mHTT	7.57793	speed		7	6	Non_targeting_hpRNA_glial_mHTT	2.12227	speed		5	2	Non_targeting_hpRNA_glial_mHTT	6.35363	speed
10	siHTT_glial_mHTT_glial_mHTT	3	11.2965	speed		5	9	Non_targeting_hpRNA_glial_mHTT	9.04111	speed		8	6	Non_targeting_hpRNA_glial_mHTT	4.74043	speed		5	3	Non_targeting_hpRNA_glial_mHTT	7.87586	speed
10	siHTT_glial_mHTT_glial_mHTT	4	9.48802	speed		6	4	Non_targeting_hpRNA_glial_mHTT	7.13998	speed		9	6	Non_targeting_hpRNA_glial_mHTT	4.6059	speed		5	4	Non_targeting_hpRNA_glial_mHTT	8.2076	speed
10	siHTT_glial_mHTT_glial_mHTT	5	12.047	speed		6	5	Non_targeting_hpRNA_glial_mHTT	8.83237	speed		1	1	siHTT_glial_mHTT	12.5356	speed		5	5	Non_targeting_hpRNA_glial_mHTT	9.17902	speed
10	siHTT_glial_mHTT_glial_mHTT	6	11.271	speed		6	6	Non_targeting_hpRNA_glial_mHTT	7.65282	speed		1	2	siHTT_glial_mHTT	11.4488	speed		6	1	Non_targeting_hpRNA_glial_mHTT	5.22622	speed
1	Non_targeting_hpRNA_glial_mHTT	1	12.2857	speed		6	7	Non_targeting_hpRNA_glial_mHTT	7.90555	speed		2	1	siHTT_glial_mHTT	12.1656	speed		6	2	Non_targeting_hpRNA_glial_mHTT	9.89371	speed
1	Non_targeting_hpRNA_glial_mHTT	2	11.5121	speed		6	8	Non_targeting_hpRNA_glial_mHTT	8.78279	speed		2	2	siHTT_glial_mHTT	13.2191	speed		6	3	Non_targeting_hpRNA_glial_mHTT	8.55529	speed
1	Non_targeting_hpRNA_glial_mHTT	3	12.6182	speed		6	9	Non_targeting_hpRNA_glial_mHTT	9.46893	speed		3	1	siHTT_glial_mHTT	13.6606	speed		6	4	Non_targeting_hpRNA_glial_mHTT	8.24916	speed
1	Non_targeting_hpRNA_glial_mHTT	4	12.3833	speed		7	4	Non_targeting_hpRNA_glial_mHTT	5.6189	speed		3	2	siHTT_glial_mHTT	11.9763	speed		6	5	Non_targeting_hpRNA_glial_mHTT	7.31184	speed
1	Non_targeting_hpRNA_glial_mHTT	5	11.359	speed		7	5	Non_targeting_hpRNA_glial_mHTT	5.35695	speed		4	1	siHTT_glial_mHTT	13.0399	speed		7	1	Non_targeting_hpRNA_glial_mHTT	6.77791	speed
1	Non_targeting_hpRNA_glial_mHTT	6	11.6837	speed		7	6	Non_targeting_hpRNA_glial_mHTT	6.16701	speed		4	2	siHTT_glial_mHTT	10.0979	speed		7	2	Non_targeting_hpRNA_glial_mHTT	9.59208	speed
2	Non_targeting_hpRNA_glial_mHTT	1	9.96251	speed		7	7	Non_targeting_hpRNA_glial_mHTT	6.5794	speed		5	1	siHTT_glial_mHTT	13.4475	speed		7	3	Non_targeting_hpRNA_glial_mHTT	6.13974	speed
2	Non_targeting_hpRNA_glial_mHTT	2	13.6248	speed		7	8	Non_targeting_hpRNA_glial_mHTT	3.15871	speed		5	2	siHTT_glial_mHTT	11.978	speed		7	4	Non_targeting_hpRNA_glial_mHTT	8.04026	speed
2	Non_targeting_hpRNA_glial_mHTT	3	13.0392	speed		7	9	Non_targeting_hpRNA_glial_mHTT	6.84853	speed		6	1	siHTT_glial_mHTT	13.5401	speed		7	5	Non_targeting_hpRNA_glial_mHTT	7.86009	speed
2	Non_targeting_hpRNA_glial_mHTT	4	13.5422	speed		8	4	Non_targeting_hpRNA_glial_mHTT	3.70587	speed		6	2	siHTT_glial_mHTT	11.5133	speed		1	1	330081_glial_mHTT	13.2132	speed
2	Non_targeting_hpRNA_glial_mHTT	5	12.64	speed		8	5	Non_targeting_hpRNA_glial_mHTT	5.43729	speed		7	1	siHTT_glial_mHTT	12.4868	speed		1	2	330081_glial_mHTT	14.372	speed
2	Non_targeting_hpRNA_glial_mHTT	6	12.2532	speed		8	6	Non_targeting_hpRNA_glial_mHTT	4.08136	speed		7	2	siHTT_glial_mHTT	12.7704	speed		1	3	330081_glial_mHTT	12.5893	speed
4	Non_targeting_hpRNA_glial_mHTT	1	11.1024	speed		8	7	Non_targeting_hpRNA_glial_mHTT	6.7945	speed		8	1	siHTT_glial_mHTT	11.8278	speed		2	1	330081_glial_mHTT	13.2076	speed
4	Non_targeting_hpRNA_glial_mHTT	2	9.7395	speed		8	8	Non_targeting_hpRNA_glial_mHTT	5.31661	speed		8	2	siHTT_glial_mHTT	13.1025	speed		2	2	330081_glial_mHTT	13.7973	speed
4	Non_targeting_hpRNA_glial_mHTT	3	8.14349	speed		8	9	Non_targeting_hpRNA_glial_mHTT	5.52046	speed		1	2	siHTT_glial_mHTT	10.2567	speed		2	3	330081_glial_mHTT	12.4454	speed
4	Non_targeting_hpRNA_glial_mHTT	4	9.25889	speed		9	4	Non_targeting_hpRNA_glial_mHTT	4.34657	speed		1	3	siHTT_glial_mHTT	9.56936	speed		3	1	330081_glial_mHTT	13.9081	speed
4	Non_targeting_hpRNA_glial_mHTT	5	10.1893	speed		9	5	Non_targeting_hpRNA_glial_mHTT	2.85177	speed		1	4	siHTT_glial_mHTT	11.8178	speed		3	2	330081_glial_mHTT	13.3943	speed
4	Non_targeting_hpRNA_glial_mHTT	6	10.6248	speed		9	6	Non_targeting_hpRNA_glial_mHTT	4.6864	speed		2	2	siHTT_glial_mHTT	12.7563	speed		3	3	330081_glial_mHTT	12.5898	speed
5	Non_targeting_hpRNA_glial_mHTT	1	7.85105	speed		9	7	Non_targeting_hpRNA_glial_mHTT	4.86627	speed		2	3	siHTT_glial_mHTT	13.1716	speed		4	1	330081_glial_mHTT	12.7752	speed
5	Non_targeting_hpRNA_glial_mHTT	2	4.03852	speed		9	8	Non_targeting_hpRNA_glial_mHTT	5.56095	speed		2	4	siHTT_glial_mHTT	13.6013	speed		4	2	330081_glial_mHTT	10.0145	speed
5	Non_targeting_hpRNA_glial_mHTT	3	3.65515	speed		9	9	Non_targeting_hpRNA_glial_mHTT	5.22565	speed		3	2	siHTT_glial_mHTT	14.3955	speed		4	3	330081_glial_mHTT	10.5475	speed
5	Non_targeting_hpRNA_glial_mHTT	4	4.54843	speed		10	4	Non_targeting_hpRNA_glial_mHTT	5.04009	speed		3	3	siHTT_glial_mHTT	12.5809	speed		5	1	330081_glial_mHTT	8.31638	speed
5	Non_targeting_hpRNA_glial_mHTT	5	2.51828	speed		10	5	Non_targeting_hpRNA_glial_mHTT	6.0648	speed		3	4	siHTT_glial_mHTT	13.2191	speed		5	2	330081_glial_mHTT	10.5323	speed
5	Non_targeting_hpRNA_glial_mHTT	6	5.10613	speed		10	6	Non_targeting_hpRNA_glial_mHTT	5.77228	speed		4	2	siHTT_glial_mHTT	13.2839	speed		5	3	330081_glial_mHTT	10.689	speed
6	Non_targeting_hpRNA_glial_mHTT	1	3.0872	speed		10	7	Non_targeting_hpRNA_glial_mHTT	5.35377	speed		4	3	siHTT_glial_mHTT	13.8132	speed		6	1	330081_glial_mHTT	10.2888	speed
6	Non_targeting_hpRNA_glial_mHTT	2	2.43262	speed		10	8	Non_targeting_hpRNA_glial_mHTT	6.00173	speed		4	4	siHTT_glial_mHTT	12.4869	speed		6	2	330081_glial_mHTT	11.2617	speed
6	Non_targeting_hpRNA_glial_mHTT	3	2.46842	speed		10	9	Non_targeting_hpRNA_glial_mHTT	5.95935	speed		5	2	siHTT_glial_mHTT	13.31	speed		6	3	330081_glial_mHTT	9.62746	speed
6	Non_targeting_hpRNA_glial_mHTT	4	3.04963	speed		2	1	siHTT_glial_mHTT	13.2992	speed		5	3	siHTT_glial_mHTT	10.8609	speed		7	1	330081_glial_mHTT	9.92126	speed
6	Non_targeting_hpRNA_glial_mHTT	5	2.99527	speed		2	2	siHTT_glial_mHTT	13.3696	speed		5	4	siHTT_glial_mHTT	13.15	speed		7	2	330081_glial_mHTT	10.6104	speed
6	Non_targeting_hpRNA_glial_mHTT	6	2.05057	speed		2	3	siHTT_glial_mHTT	13.4244	speed		6	2	siHTT_glial_mHTT	10.7814	speed		7	3	330081_glial_mHTT	10.1885	speed
7	Non_targeting_hpRNA_glial_mHTT	1	4.41413	speed		3	1	siHTT_glial_mHTT	12.2189	speed		6	3	siHTT_glial_mHTT	14.081	speed
7	Non_targeting_hpRNA_glial_mHTT	2	5.09117	speed		3	2	siHTT_glial_mHTT	15.1816	speed		6	4	siHTT_glial_mHTT	13.5522	speed
7	Non_targeting_hpRNA_glial_mHTT	3	4.73442	speed		3	3	siHTT_glial_mHTT	13.605	speed		7	2	siHTT_glial_mHTT	12.7851	speed
7	Non_targeting_hpRNA_glial_mHTT	4	5.83814	speed		4	1	siHTT_glial_mHTT	9.0569	speed		7	3	siHTT_glial_mHTT	12.3284	speed
7	Non_targeting_hpRNA_glial_mHTT	5	1.99195	speed		4	2	siHTT_glial_mHTT	11.138	speed		7	4	siHTT_glial_mHTT	11.6353	speed
7	Non_targeting_hpRNA_glial_mHTT	6	5.29854	speed		4	3	siHTT_glial_mHTT	11.5359	speed		8	2	siHTT_glial_mHTT	12.551	speed
8	Non_targeting_hpRNA_glial_mHTT	1	6.72435	speed		5	1	siHTT_glial_mHTT	10.8251	speed		8	3	siHTT_glial_mHTT	12.3522	speed
8	Non_targeting_hpRNA_glial_mHTT	2	4.35576	speed		5	2	siHTT_glial_mHTT	12.4236	speed		8	4	siHTT_glial_mHTT	11.9198	speed
8	Non_targeting_hpRNA_glial_mHTT	3	2.26231	speed		5	3	siHTT_glial_mHTT	11.2458	speed		9	2	siHTT_glial_mHTT	12.8324	speed
8	Non_targeting_hpRNA_glial_mHTT	4	2.38498	speed		6	1	siHTT_glial_mHTT	11.8401	speed		9	3	siHTT_glial_mHTT	12.288	speed
8	Non_targeting_hpRNA_glial_mHTT	5	3.40026	speed		6	2	siHTT_glial_mHTT	13.5891	speed		9	4	siHTT_glial_mHTT	11.3166	speed
8	Non_targeting_hpRNA_glial_mHTT	6	2.41341	speed		6	3	siHTT_glial_mHTT	12.2754	speed		1	5	siHTT_glial_mHTT	11.3322	speed
9	Non_targeting_hpRNA_glial_mHTT	1	5.55535	speed		7	1	siHTT_glial_mHTT	11.1653	speed		1	6	siHTT_glial_mHTT	11.6054	speed
9	Non_targeting_hpRNA_glial_mHTT	2	5.48958	speed		7	2	siHTT_glial_mHTT	11.6307	speed		1	7	siHTT_glial_mHTT	10.7686	speed
9	Non_targeting_hpRNA_glial_mHTT	3	2.50745	speed		7	3	siHTT_glial_mHTT	11.1752	speed		2	5	siHTT_glial_mHTT	11.9043	speed
9	Non_targeting_hpRNA_glial_mHTT	4	3.03816	speed		8	1	siHTT_glial_mHTT	12.4244	speed		2	6	siHTT_glial_mHTT	11.5123	speed
9	Non_targeting_hpRNA_glial_mHTT	5	3.43481	speed		8	2	siHTT_glial_mHTT	12.1311	speed		2	7	siHTT_glial_mHTT	5.13955	speed
9	Non_targeting_hpRNA_glial_mHTT	6	4.64373	speed		8	3	siHTT_glial_mHTT	11.0372	speed		3	5	siHTT_glial_mHTT	14.1215	speed
10	Non_targeting_hpRNA_glial_mHTT	1	4.04282	speed		9	1	siHTT_glial_mHTT	11.8206	speed		3	6	siHTT_glial_mHTT	14.713	speed
10	Non_targeting_hpRNA_glial_mHTT	2	3.58632	speed		9	2	siHTT_glial_mHTT	10.974	speed		3	7	siHTT_glial_mHTT	12.4855	speed
10	Non_targeting_hpRNA_glial_mHTT	3	2.7394	speed		9	3	siHTT_glial_mHTT	11.8046	speed		4	5	siHTT_glial_mHTT	13.1075	speed
10	Non_targeting_hpRNA_glial_mHTT	4	1.69188	speed		10	1	siHTT_glial_mHTT	12.2077	speed		4	6	siHTT_glial_mHTT	12.9115	speed
10	Non_targeting_hpRNA_glial_mHTT	5	2.64341	speed		10	2	siHTT_glial_mHTT	11.9961	speed		4	7	siHTT_glial_mHTT	13.2786	speed
10	Non_targeting_hpRNA_glial_mHTT	6	3.70813	speed		10	3	siHTT_glial_mHTT	11.2358	speed		5	5	siHTT_glial_mHTT	12.6432	speed
1	1793_glial_mHTT	1	13.6927	speed		2	4	siHTT_glial_mHTT	12.0412	speed		5	6	siHTT_glial_mHTT	10.2839	speed
1	1793_glial_mHTT	2	9.77062	speed		2	5	siHTT_glial_mHTT	13.1155	speed		5	7	siHTT_glial_mHTT	11.408	speed
1	1793_glial_mHTT	3	12.7483	speed		2	6	siHTT_glial_mHTT	13.2336	speed		6	5	siHTT_glial_mHTT	13.2561	speed
1	1793_glial_mHTT	4	10.6183	speed		2	7	siHTT_glial_mHTT	11.8445	speed		6	6	siHTT_glial_mHTT	12.3061	speed
2	1793_glial_mHTT	1	14.5294	speed		2	8	siHTT_glial_mHTT	12.1505	speed		6	7	siHTT_glial_mHTT	11.9249	speed
2	1793_glial_mHTT	2	12.3122	speed		3	4	siHTT_glial_mHTT	13.8722	speed		7	5	siHTT_glial_mHTT	12.5336	speed
2	1793_glial_mHTT	3	13.8477	speed		3	5	siHTT_glial_mHTT	13.3553	speed		7	6	siHTT_glial_mHTT	11.9912	speed
2	1793_glial_mHTT	4	11.4572	speed		3	6	siHTT_glial_mHTT	12.6795	speed		7	7	siHTT_glial_mHTT	11.0928	speed
4	1793_glial_mHTT	1	13.3883	speed		3	7	siHTT_glial_mHTT	12.2869	speed		8	5	siHTT_glial_mHTT	12.2642	speed
4	1793_glial_mHTT	2	12.0696	speed		3	8	siHTT_glial_mHTT	12.6874	speed		8	6	siHTT_glial_mHTT	14.0586	speed
4	1793_glial_mHTT	3	12.6111	speed		4	4	siHTT_glial_mHTT	12.913	speed		8	7	siHTT_glial_mHTT	11.0016	speed
4	1793_glial_mHTT	4	11.7262	speed		4	5	siHTT_glial_mHTT	12.3921	speed		9	5	siHTT_glial_mHTT	9.9565	speed
5	1793_glial_mHTT	1	9.54913	speed		4	6	siHTT_glial_mHTT	11.0439	speed		9	6	siHTT_glial_mHTT	12.5028	speed
5	1793_glial_mHTT	2	10.6686	speed		4	7	siHTT_glial_mHTT	10.6887	speed		9	7	siHTT_glial_mHTT	9.82817	speed
5	1793_glial_mHTT	3	7.48929	speed		4	8	siHTT_glial_mHTT	11.7876	speed		1	2	44822 glial_mHTT	13.5601	speed
5	1793_glial_mHTT	4	7.201	speed		5	4	siHTT_glial_mHTT	11.9177	speed		2	2	44822 glial_mHTT	12.2961	speed
6	1793_glial_mHTT	1	3.22705	speed		5	5	siHTT_glial_mHTT	12.4605	speed		3	2	44822 glial_mHTT	15.0499	speed
6	1793_glial_mHTT	2	3.09318	speed		5	6	siHTT_glial_mHTT	11.0883	speed		4	2	44822 glial_mHTT	13.9471	speed
6	1793_glial_mHTT	3	4.03127	speed		5	7	siHTT_glial_mHTT	11.2689	speed		5	2	44822 glial_mHTT	13.8606	speed
6	1793_glial_mHTT	4	3.92376	speed		5	8	siHTT_glial_mHTT	11.3274	speed		6	2	44822 glial_mHTT	7.05185	speed
7	1793_glial_mHTT	1	3.5924	speed		6	4	siHTT_glial_mHTT	11.056	speed		7	2	44822 glial_mHTT	11.7592	speed
7	1793_glial_mHTT	2	5.73501	speed		6	5	siHTT_glial_mHTT	11.9035	speed		8	2	44822 glial_mHTT	7.75825	speed
7	1793_glial_mHTT	3	6.57587	speed		6	6	siHTT_glial_mHTT	10.2836	speed		1	3	44822 glial_mHTT	11.5274	speed
7	1793_glial_mHTT	4	3.6459	speed		6	7	siHTT_glial_mHTT	11.5262	speed		1	4	44822 glial_mHTT	10.3103	speed
8	1793_glial_mHTT	1	3.55404	speed		6	8	siHTT_glial_mHTT	13.6128	speed		1	5	44822 glial_mHTT	11.4418	speed
8	1793_glial_mHTT	2	5.34008	speed		7	4	siHTT_glial_mHTT	10.765	speed		1	6	44822 glial_mHTT	10.9279	speed
8	1793_glial_mHTT	3	4.96703	speed		7	5	siHTT_glial_mHTT	11.6304	speed		2	3	44822 glial_mHTT	14.5378	speed
8	1793_glial_mHTT	4	5.39193	speed		7	6	siHTT_glial_mHTT	8.73746	speed		2	4	44822 glial_mHTT	13.6924	speed
9	1793_glial_mHTT	1	3.25664	speed		7	7	siHTT_glial_mHTT	10.5596	speed		2	5	44822 glial_mHTT	12.2295	speed
9	1793_glial_mHTT	2	3.90545	speed		7	8	siHTT_glial_mHTT	9.94202	speed		2	6	44822 glial_mHTT	13.6478	speed
9	1793_glial_mHTT	3	2.47431	speed		8	4	siHTT_glial_mHTT	11.6355	speed		3	3	44822 glial_mHTT	14.0306	speed
9	1793_glial_mHTT	4	2.92535	speed		8	5	siHTT_glial_mHTT	12.9402	speed		3	4	44822 glial_mHTT	12.1599	speed
10	1793_glial_mHTT	1	1.1202	speed		8	6	siHTT_glial_mHTT	10.6889	speed		3	5	44822 glial_mHTT	11.8662	speed
10	1793_glial_mHTT	2	3.98652	speed		8	7	siHTT_glial_mHTT	9.80732	speed		3	6	44822 glial_mHTT	12.3757	speed
10	1793_glial_mHTT	3	3.04457	speed		8	8	siHTT_glial_mHTT	11.5471	speed		4	3	44822 glial_mHTT	13.5188	speed
10	1793_glial_mHTT	4	3.07194	speed		9	4	siHTT_glial_mHTT	11.4795	speed		4	4	44822 glial_mHTT	12.3934	speed
						9	5	siHTT_glial_mHTT	12.4085	speed		4	5	44822 glial_mHTT	10.7894	speed
						9	6	siHTT_glial_mHTT	9.7591	speed		4	6	44822 glial_mHTT	11.8099	speed
						9	7	siHTT_glial_mHTT	10.2836	speed		5	3	44822 glial_mHTT	12.7032	speed
						9	8	siHTT_glial_mHTT	11.8668	speed		5	4	44822 glial_mHTT	11.8346	speed
						10	4	siHTT_glial_mHTT	13.3354	speed		5	5	44822 glial_mHTT	12.3153	speed
						10	5	siHTT_glial_mHTT	9.84851	speed		5	6	44822 glial_mHTT	11.4744	speed
						10	6	siHTT_glial_mHTT	12.4092	speed		6	3	44822 glial_mHTT	11.1601	speed
						10	7	siHTT_glial_mHTT	11.8995	speed		6	4	44822 glial_mHTT	10.6724	speed
						10	8	siHTT_glial_mHTT	13.2458	speed		6	5	44822 glial_mHTT	9.91915	speed
						2	1	34116 glial_mHTT	13.8441	speed		6	6	44822 glial_mHTT	11.2967	speed
						2	2	34116 glial_mHTT	15.5031	speed		7	3	44822 glial_mHTT	8.22423	speed
						2	3	34116 glial_mHTT	13.473	speed		7	4	44822 glial_mHTT	9.28046	speed
						2	4	34116 glial_mHTT	15.101	speed		7	5	44822 glial_mHTT	9.75319	speed
						2	5	34116 glial_mHTT	13.8591	speed		7	6	44822 glial_mHTT	9.35254	speed
						3	1	34116 glial_mHTT	14.4199	speed		8	3	44822 glial_mHTT	9.82698	speed
						3	2	34116 glial_mHTT	14.079	speed		8	4	44822 glial_mHTT	9.98078	speed
						3	3	34116 glial_mHTT	14.8486	speed		8	5	44822 glial_mHTT	7.43501	speed
						3	4	34116 glial_mHTT	15.8004	speed		8	6	44822 glial_mHTT	8.7403	speed
						3	5	34116 glial_mHTT	13.5784	speed		9	3	44822 glial_mHTT	7.57475	speed
						4	1	34116 glial_mHTT	10.9851	speed		9	4	44822 glial_mHTT	8.64146	speed
						4	2	34116 glial_mHTT	9.27673	speed		9	5	44822 glial_mHTT	8.87902	speed
						4	3	34116 glial_mHTT	10.3861	speed		9	6	44822 glial_mHTT	8.31069	speed
						4	4	34116 glial_mHTT	12.2166	speed
						4	5	34116 glial_mHTT	9.98033	speed
						5	1	34116 glial_mHTT	9.73982	speed
						5	2	34116 glial_mHTT	12.4276	speed
						5	3	34116 glial_mHTT	10.4291	speed
						5	4	34116 glial_mHTT	12.1282	speed
						5	5	34116 glial_mHTT	7.25054	speed
						6	1	34116 glial_mHTT	10.4476	speed
						6	2	34116 glial_mHTT	10.2139	speed
						6	3	34116 glial_mHTT	10.6382	speed
						6	4	34116 glial_mHTT	10.2231	speed
						6	5	34116 glial_mHTT	9.92782	speed
						7	1	34116 glial_mHTT	4.62364	speed
						7	2	34116 glial_mHTT	5.3737	speed
						7	3	34116 glial_mHTT	8.95942	speed
						7	4	34116 glial_mHTT	7.63888	speed
						7	5	34116 glial_mHTT	6.97605	speed
						8	1	34116 glial_mHTT	5.1003	speed
						8	2	34116 glial_mHTT	7.54061	speed
						8	3	34116 glial_mHTT	7.67051	speed
						8	4	34116 glial_mHTT	7.34756	speed
						8	5	34116 glial_mHTT	5.91188	speed
						9	1	34116 glial_mHTT	7.62941	speed
						9	2	34116 glial_mHTT	9.44741	speed
						9	3	34116 glial_mHTT	7.60899	speed
						9	4	34116 glial_mHTT	7.30231	speed
						9	5	34116 glial_mHTT	8.16367	speed
						10	1	34116 glial_mHTT	6.04871	speed
						10	2	34116 glial_mHTT	7.21052	speed
						10	3	34116 glial_mHTT	3.7166	speed
						10	4	34116 glial_mHTT	4.88361	speed
						10	5	34116 glial_mHTT	5.25708	speed

## Sheet: HOMER1
homer VDRC 100271						homer BDSC 9564
Trialday	Replicate	Genotype	Observation	Metric		Trialday	Replicate	Genotype	Observation	Metric
1	1	siHTT_glial_mHTT	11.6776	speed		2	1	Non_targeting_hpRNA_glial_mHTT	14.2278	speed
2	1	siHTT_glial_mHTT	12.0328	speed		2	2	Non_targeting_hpRNA_glial_mHTT	15.5571	speed
3	1	siHTT_glial_mHTT	11.3722	speed		2	3	Non_targeting_hpRNA_glial_mHTT	14.5411	speed
4	1	siHTT_glial_mHTT	11.8439	speed		3	1	Non_targeting_hpRNA_glial_mHTT	12.1723	speed
5	1	siHTT_glial_mHTT	8.98182	speed		3	2	Non_targeting_hpRNA_glial_mHTT	12.2934	speed
6	1	siHTT_glial_mHTT	10.4872	speed		3	3	Non_targeting_hpRNA_glial_mHTT	9.53973	speed
7	1	siHTT_glial_mHTT	11.0565	speed		4	1	Non_targeting_hpRNA_glial_mHTT	8.78102	speed
8	1	siHTT_glial_mHTT	9.43098	speed		4	2	Non_targeting_hpRNA_glial_mHTT	10.7369	speed
9	1	siHTT_glial_mHTT	10.2866	speed		4	3	Non_targeting_hpRNA_glial_mHTT	9.95084	speed
1	2	siHTT_glial_mHTT	11.1304	speed		5	1	Non_targeting_hpRNA_glial_mHTT	5.73557	speed
1	3	siHTT_glial_mHTT	11.7432	speed		5	2	Non_targeting_hpRNA_glial_mHTT	9.92094	speed
1	4	siHTT_glial_mHTT	12.178	speed		5	3	Non_targeting_hpRNA_glial_mHTT	10.0181	speed
1	5	siHTT_glial_mHTT	12.2026	speed		6	1	Non_targeting_hpRNA_glial_mHTT	4.91453	speed
1	6	siHTT_glial_mHTT	10.5363	speed		6	2	Non_targeting_hpRNA_glial_mHTT	9.42369	speed
1	7	siHTT_glial_mHTT	11.2252	speed		6	3	Non_targeting_hpRNA_glial_mHTT	9.29628	speed
1	8	siHTT_glial_mHTT	9.85915	speed		7	1	Non_targeting_hpRNA_glial_mHTT	4.65538	speed
1	9	siHTT_glial_mHTT	10.2241	speed		7	2	Non_targeting_hpRNA_glial_mHTT	4.87125	speed
1	10	siHTT_glial_mHTT	11.864	speed		7	3	Non_targeting_hpRNA_glial_mHTT	8.14019	speed
1	11	siHTT_glial_mHTT	12.2195	speed		8	1	Non_targeting_hpRNA_glial_mHTT	3.44567	speed
2	2	siHTT_glial_mHTT	12.1171	speed		8	2	Non_targeting_hpRNA_glial_mHTT	5.02795	speed
2	3	siHTT_glial_mHTT	13.7433	speed		8	3	Non_targeting_hpRNA_glial_mHTT	4.10722	speed
2	4	siHTT_glial_mHTT	11.6015	speed		9	1	Non_targeting_hpRNA_glial_mHTT	6.6524	speed
2	5	siHTT_glial_mHTT	13.3805	speed		9	2	Non_targeting_hpRNA_glial_mHTT	7.84532	speed
2	6	siHTT_glial_mHTT	11.7028	speed		9	3	Non_targeting_hpRNA_glial_mHTT	7.73044	speed
2	7	siHTT_glial_mHTT	12.5929	speed		10	1	Non_targeting_hpRNA_glial_mHTT	3.7822	speed
2	8	siHTT_glial_mHTT	12.7692	speed		10	2	Non_targeting_hpRNA_glial_mHTT	3.05975	speed
2	9	siHTT_glial_mHTT	11.7835	speed		10	3	Non_targeting_hpRNA_glial_mHTT	6.99881	speed
2	10	siHTT_glial_mHTT	13.1984	speed		2	4	Non_targeting_hpRNA_glial_mHTT	11.6946	speed
2	11	siHTT_glial_mHTT	12.3759	speed		2	5	Non_targeting_hpRNA_glial_mHTT	12.322	speed
3	2	siHTT_glial_mHTT	11.4314	speed		2	6	Non_targeting_hpRNA_glial_mHTT	11.7243	speed
3	3	siHTT_glial_mHTT	12.8252	speed		2	7	Non_targeting_hpRNA_glial_mHTT	11.9576	speed
3	4	siHTT_glial_mHTT	11.1103	speed		2	8	Non_targeting_hpRNA_glial_mHTT	10.4241	speed
3	5	siHTT_glial_mHTT	13.9536	speed		2	9	Non_targeting_hpRNA_glial_mHTT	11.88	speed
3	6	siHTT_glial_mHTT	12.2395	speed		3	4	Non_targeting_hpRNA_glial_mHTT	11.9101	speed
3	7	siHTT_glial_mHTT	11.9881	speed		3	5	Non_targeting_hpRNA_glial_mHTT	12.1479	speed
3	8	siHTT_glial_mHTT	12.4933	speed		3	6	Non_targeting_hpRNA_glial_mHTT	12.3648	speed
3	9	siHTT_glial_mHTT	12.0104	speed		3	7	Non_targeting_hpRNA_glial_mHTT	13.3803	speed
3	10	siHTT_glial_mHTT	12.5815	speed		3	8	Non_targeting_hpRNA_glial_mHTT	10.8529	speed
3	11	siHTT_glial_mHTT	13.2395	speed		3	9	Non_targeting_hpRNA_glial_mHTT	11.6781	speed
3	12	siHTT_glial_mHTT	12.7287	speed		4	4	Non_targeting_hpRNA_glial_mHTT	8.41563	speed
4	2	siHTT_glial_mHTT	12.3754	speed		4	5	Non_targeting_hpRNA_glial_mHTT	11.4763	speed
4	3	siHTT_glial_mHTT	13.2131	speed		4	6	Non_targeting_hpRNA_glial_mHTT	10.7076	speed
4	4	siHTT_glial_mHTT	11.0852	speed		4	7	Non_targeting_hpRNA_glial_mHTT	10.2271	speed
4	5	siHTT_glial_mHTT	6.14971	speed		4	8	Non_targeting_hpRNA_glial_mHTT	10.6616	speed
4	6	siHTT_glial_mHTT	12.4154	speed		4	9	Non_targeting_hpRNA_glial_mHTT	10.7341	speed
4	7	siHTT_glial_mHTT	11.4226	speed		5	4	Non_targeting_hpRNA_glial_mHTT	7.73139	speed
4	8	siHTT_glial_mHTT	12.7347	speed		5	5	Non_targeting_hpRNA_glial_mHTT	8.67637	speed
4	9	siHTT_glial_mHTT	11.9037	speed		5	6	Non_targeting_hpRNA_glial_mHTT	8.29841	speed
4	10	siHTT_glial_mHTT	11.0361	speed		5	7	Non_targeting_hpRNA_glial_mHTT	5.94291	speed
4	11	siHTT_glial_mHTT	7.16206	speed		5	8	Non_targeting_hpRNA_glial_mHTT	7.57793	speed
4	12	siHTT_glial_mHTT	12.3715	speed		5	9	Non_targeting_hpRNA_glial_mHTT	9.04111	speed
5	2	siHTT_glial_mHTT	10.2003	speed		6	4	Non_targeting_hpRNA_glial_mHTT	7.13998	speed
5	3	siHTT_glial_mHTT	13.3692	speed		6	5	Non_targeting_hpRNA_glial_mHTT	8.83237	speed
5	4	siHTT_glial_mHTT	11.0697	speed		6	6	Non_targeting_hpRNA_glial_mHTT	7.65282	speed
5	5	siHTT_glial_mHTT	12.2186	speed		6	7	Non_targeting_hpRNA_glial_mHTT	7.90555	speed
5	6	siHTT_glial_mHTT	11.1897	speed		6	8	Non_targeting_hpRNA_glial_mHTT	8.78279	speed
5	7	siHTT_glial_mHTT	10.975	speed		6	9	Non_targeting_hpRNA_glial_mHTT	9.46893	speed
5	8	siHTT_glial_mHTT	10.364	speed		7	4	Non_targeting_hpRNA_glial_mHTT	5.6189	speed
5	11	siHTT_glial_mHTT	13.3944	speed		7	5	Non_targeting_hpRNA_glial_mHTT	5.35695	speed
5	12	siHTT_glial_mHTT	13.7832	speed		7	6	Non_targeting_hpRNA_glial_mHTT	6.16701	speed
6	2	siHTT_glial_mHTT	11.4127	speed		7	7	Non_targeting_hpRNA_glial_mHTT	6.5794	speed
6	3	siHTT_glial_mHTT	12.2705	speed		7	8	Non_targeting_hpRNA_glial_mHTT	3.15871	speed
6	4	siHTT_glial_mHTT	10.7582	speed		7	9	Non_targeting_hpRNA_glial_mHTT	6.84853	speed
6	5	siHTT_glial_mHTT	12.2527	speed		8	4	Non_targeting_hpRNA_glial_mHTT	3.70587	speed
6	6	siHTT_glial_mHTT	10.2628	speed		8	5	Non_targeting_hpRNA_glial_mHTT	5.43729	speed
6	7	siHTT_glial_mHTT	10.5368	speed		8	6	Non_targeting_hpRNA_glial_mHTT	4.08136	speed
6	8	siHTT_glial_mHTT	13.2073	speed		8	7	Non_targeting_hpRNA_glial_mHTT	6.7945	speed
6	9	siHTT_glial_mHTT	11.307	speed		8	8	Non_targeting_hpRNA_glial_mHTT	5.31661	speed
6	10	siHTT_glial_mHTT	10.3073	speed		8	9	Non_targeting_hpRNA_glial_mHTT	5.52046	speed
6	11	siHTT_glial_mHTT	11.7229	speed		9	4	Non_targeting_hpRNA_glial_mHTT	4.34657	speed
6	12	siHTT_glial_mHTT	12.2721	speed		9	5	Non_targeting_hpRNA_glial_mHTT	2.85177	speed
7	2	siHTT_glial_mHTT	10.7417	speed		9	6	Non_targeting_hpRNA_glial_mHTT	4.6864	speed
7	3	siHTT_glial_mHTT	11.3534	speed		9	7	Non_targeting_hpRNA_glial_mHTT	4.86627	speed
7	4	siHTT_glial_mHTT	9.91126	speed		9	8	Non_targeting_hpRNA_glial_mHTT	5.56095	speed
7	5	siHTT_glial_mHTT	12.2932	speed		9	9	Non_targeting_hpRNA_glial_mHTT	5.22565	speed
7	6	siHTT_glial_mHTT	10.9339	speed		10	4	Non_targeting_hpRNA_glial_mHTT	5.04009	speed
7	7	siHTT_glial_mHTT	10.182	speed		10	5	Non_targeting_hpRNA_glial_mHTT	6.0648	speed
7	8	siHTT_glial_mHTT	10.3641	speed		10	6	Non_targeting_hpRNA_glial_mHTT	5.77228	speed
7	9	siHTT_glial_mHTT	9.36013	speed		10	7	Non_targeting_hpRNA_glial_mHTT	5.35377	speed
7	10	siHTT_glial_mHTT	10.9701	speed		10	8	Non_targeting_hpRNA_glial_mHTT	6.00173	speed
7	11	siHTT_glial_mHTT	10.8141	speed		10	9	Non_targeting_hpRNA_glial_mHTT	5.95935	speed
7	12	siHTT_glial_mHTT	10.4026	speed		2	1	siHTT_glial_mHTT	13.2992	speed
8	2	siHTT_glial_mHTT	9.61868	speed		2	2	siHTT_glial_mHTT	13.3696	speed
8	3	siHTT_glial_mHTT	11.56	speed		2	3	siHTT_glial_mHTT	13.4244	speed
8	4	siHTT_glial_mHTT	9.62314	speed		3	1	siHTT_glial_mHTT	12.2189	speed
8	5	siHTT_glial_mHTT	12.1422	speed		3	2	siHTT_glial_mHTT	15.1816	speed
8	6	siHTT_glial_mHTT	10.8608	speed		3	3	siHTT_glial_mHTT	13.605	speed
8	7	siHTT_glial_mHTT	9.99514	speed		4	1	siHTT_glial_mHTT	9.0569	speed
8	8	siHTT_glial_mHTT	11.568	speed		4	2	siHTT_glial_mHTT	11.138	speed
8	9	siHTT_glial_mHTT	11.6967	speed		4	3	siHTT_glial_mHTT	11.5359	speed
8	10	siHTT_glial_mHTT	11.193	speed		5	1	siHTT_glial_mHTT	10.8251	speed
8	11	siHTT_glial_mHTT	11.4786	speed		5	2	siHTT_glial_mHTT	12.4236	speed
8	12	siHTT_glial_mHTT	11.8078	speed		5	3	siHTT_glial_mHTT	11.2458	speed
9	2	siHTT_glial_mHTT	9.83765	speed		6	1	siHTT_glial_mHTT	11.8401	speed
9	3	siHTT_glial_mHTT	11.8075	speed		6	2	siHTT_glial_mHTT	13.5891	speed
9	4	siHTT_glial_mHTT	9.6659	speed		6	3	siHTT_glial_mHTT	12.2754	speed
10	5	siHTT_glial_mHTT	11.2256	speed		7	1	siHTT_glial_mHTT	11.1653	speed
10	6	siHTT_glial_mHTT	9.5912	speed		7	2	siHTT_glial_mHTT	11.6307	speed
10	7	siHTT_glial_mHTT	8.36443	speed		7	3	siHTT_glial_mHTT	11.1752	speed
10	8	siHTT_glial_mHTT	9.80208	speed		8	1	siHTT_glial_mHTT	12.4244	speed
10	11	siHTT_glial_mHTT	9.17704	speed		8	2	siHTT_glial_mHTT	12.1311	speed
10	12	siHTT_glial_mHTT	11.2724	speed		8	3	siHTT_glial_mHTT	11.0372	speed
1	1	Non_targeting_hpRNA_glial_mHTT	12.2947	speed		9	1	siHTT_glial_mHTT	11.8206	speed
1	2	Non_targeting_hpRNA_glial_mHTT	12.539	speed		9	2	siHTT_glial_mHTT	10.974	speed
1	3	Non_targeting_hpRNA_glial_mHTT	11.7268	speed		9	3	siHTT_glial_mHTT	11.8046	speed
1	4	Non_targeting_hpRNA_glial_mHTT	10.6945	speed		10	1	siHTT_glial_mHTT	12.2077	speed
1	5	Non_targeting_hpRNA_glial_mHTT	11.3713	speed		10	2	siHTT_glial_mHTT	11.9961	speed
1	6	Non_targeting_hpRNA_glial_mHTT	11.5927	speed		10	3	siHTT_glial_mHTT	11.2358	speed
1	7	Non_targeting_hpRNA_glial_mHTT	11.6006	speed		2	4	siHTT_glial_mHTT	12.0412	speed
1	8	Non_targeting_hpRNA_glial_mHTT	11.0395	speed		2	5	siHTT_glial_mHTT	13.1155	speed
1	9	Non_targeting_hpRNA_glial_mHTT	9.84753	speed		2	6	siHTT_glial_mHTT	13.2336	speed
1	10	Non_targeting_hpRNA_glial_mHTT	11.0663	speed		2	7	siHTT_glial_mHTT	11.8445	speed
1	11	Non_targeting_hpRNA_glial_mHTT	12.065	speed		2	8	siHTT_glial_mHTT	12.1505	speed
2	1	Non_targeting_hpRNA_glial_mHTT	12.8505	speed		3	4	siHTT_glial_mHTT	13.8722	speed
2	2	Non_targeting_hpRNA_glial_mHTT	10.4477	speed		3	5	siHTT_glial_mHTT	13.3553	speed
2	3	Non_targeting_hpRNA_glial_mHTT	11.2983	speed		3	6	siHTT_glial_mHTT	12.6795	speed
2	4	Non_targeting_hpRNA_glial_mHTT	9.70169	speed		3	7	siHTT_glial_mHTT	12.2869	speed
2	5	Non_targeting_hpRNA_glial_mHTT	10.9079	speed		3	8	siHTT_glial_mHTT	12.6874	speed
2	6	Non_targeting_hpRNA_glial_mHTT	11.4371	speed		4	4	siHTT_glial_mHTT	12.913	speed
2	7	Non_targeting_hpRNA_glial_mHTT	11.0233	speed		4	5	siHTT_glial_mHTT	12.3921	speed
2	8	Non_targeting_hpRNA_glial_mHTT	11.48	speed		4	6	siHTT_glial_mHTT	11.0439	speed
2	9	Non_targeting_hpRNA_glial_mHTT	10.5753	speed		4	7	siHTT_glial_mHTT	10.6887	speed
2	10	Non_targeting_hpRNA_glial_mHTT	10.6327	speed		4	8	siHTT_glial_mHTT	11.7876	speed
2	11	Non_targeting_hpRNA_glial_mHTT	11.1785	speed		5	4	siHTT_glial_mHTT	11.9177	speed
3	1	Non_targeting_hpRNA_glial_mHTT	10.1471	speed		5	5	siHTT_glial_mHTT	12.4605	speed
3	2	Non_targeting_hpRNA_glial_mHTT	9.57934	speed		5	6	siHTT_glial_mHTT	11.0883	speed
3	3	Non_targeting_hpRNA_glial_mHTT	10.3119	speed		5	7	siHTT_glial_mHTT	11.2689	speed
3	4	Non_targeting_hpRNA_glial_mHTT	7.83033	speed		5	8	siHTT_glial_mHTT	11.3274	speed
3	5	Non_targeting_hpRNA_glial_mHTT	10.3054	speed		6	4	siHTT_glial_mHTT	11.056	speed
3	6	Non_targeting_hpRNA_glial_mHTT	9.45921	speed		6	5	siHTT_glial_mHTT	11.9035	speed
3	7	Non_targeting_hpRNA_glial_mHTT	9.7389	speed		6	6	siHTT_glial_mHTT	10.2836	speed
3	8	Non_targeting_hpRNA_glial_mHTT	10.9143	speed		6	7	siHTT_glial_mHTT	11.5262	speed
3	9	Non_targeting_hpRNA_glial_mHTT	9.63692	speed		6	8	siHTT_glial_mHTT	13.6128	speed
3	10	Non_targeting_hpRNA_glial_mHTT	10.2763	speed		7	4	siHTT_glial_mHTT	10.765	speed
3	11	Non_targeting_hpRNA_glial_mHTT	11.1384	speed		7	5	siHTT_glial_mHTT	11.6304	speed
3	12	Non_targeting_hpRNA_glial_mHTT	10.5967	speed		7	6	siHTT_glial_mHTT	8.73746	speed
4	1	Non_targeting_hpRNA_glial_mHTT	8.7975	speed		7	7	siHTT_glial_mHTT	10.5596	speed
4	2	Non_targeting_hpRNA_glial_mHTT	7.88503	speed		7	8	siHTT_glial_mHTT	9.94202	speed
4	3	Non_targeting_hpRNA_glial_mHTT	9.14295	speed		8	4	siHTT_glial_mHTT	11.6355	speed
4	4	Non_targeting_hpRNA_glial_mHTT	7.53403	speed		8	5	siHTT_glial_mHTT	12.9402	speed
4	5	Non_targeting_hpRNA_glial_mHTT	9.77786	speed		8	6	siHTT_glial_mHTT	10.6889	speed
4	6	Non_targeting_hpRNA_glial_mHTT	8.46567	speed		8	7	siHTT_glial_mHTT	9.80732	speed
4	7	Non_targeting_hpRNA_glial_mHTT	8.59036	speed		8	8	siHTT_glial_mHTT	11.5471	speed
4	8	Non_targeting_hpRNA_glial_mHTT	8.81224	speed		9	4	siHTT_glial_mHTT	11.4795	speed
4	9	Non_targeting_hpRNA_glial_mHTT	9.16995	speed		9	5	siHTT_glial_mHTT	12.4085	speed
4	10	Non_targeting_hpRNA_glial_mHTT	8.55572	speed		9	6	siHTT_glial_mHTT	9.7591	speed
4	11	Non_targeting_hpRNA_glial_mHTT	9.70856	speed		9	7	siHTT_glial_mHTT	10.2836	speed
4	12	Non_targeting_hpRNA_glial_mHTT	6.41592	speed		9	8	siHTT_glial_mHTT	11.8668	speed
5	1	Non_targeting_hpRNA_glial_mHTT	10.7769	speed		10	4	siHTT_glial_mHTT	13.3354	speed
5	2	Non_targeting_hpRNA_glial_mHTT	6.68884	speed		10	5	siHTT_glial_mHTT	9.84851	speed
5	3	Non_targeting_hpRNA_glial_mHTT	9.04822	speed		10	6	siHTT_glial_mHTT	12.4092	speed
5	4	Non_targeting_hpRNA_glial_mHTT	7.73946	speed		10	7	siHTT_glial_mHTT	11.8995	speed
5	5	Non_targeting_hpRNA_glial_mHTT	7.68996	speed		10	8	siHTT_glial_mHTT	13.2458	speed
5	6	Non_targeting_hpRNA_glial_mHTT	7.4998	speed		2	1	9564 glial_mHTT	11.2922	speed
5	7	Non_targeting_hpRNA_glial_mHTT	7.8901	speed		2	2	9564 glial_mHTT	11.9079	speed
5	10	Non_targeting_hpRNA_glial_mHTT	5.2858	speed		2	3	9564 glial_mHTT	11.9283	speed
5	11	Non_targeting_hpRNA_glial_mHTT	9.40396	speed		2	4	9564 glial_mHTT	11.7289	speed
5	12	Non_targeting_hpRNA_glial_mHTT	10.1336	speed		2	5	9564 glial_mHTT	11.6881	speed
6	1	Non_targeting_hpRNA_glial_mHTT	7.9839	speed		3	1	9564 glial_mHTT	12.285	speed
6	2	Non_targeting_hpRNA_glial_mHTT	6.53294	speed		3	2	9564 glial_mHTT	12.0248	speed
6	3	Non_targeting_hpRNA_glial_mHTT	8.33055	speed		3	3	9564 glial_mHTT	12.2567	speed
6	4	Non_targeting_hpRNA_glial_mHTT	6.36594	speed		3	4	9564 glial_mHTT	8.99811	speed
6	5	Non_targeting_hpRNA_glial_mHTT	5.71189	speed		3	5	9564 glial_mHTT	12.8343	speed
6	6	Non_targeting_hpRNA_glial_mHTT	7.22377	speed		4	1	9564 glial_mHTT	11.8967	speed
6	7	Non_targeting_hpRNA_glial_mHTT	6.99758	speed		4	2	9564 glial_mHTT	11.4013	speed
6	8	Non_targeting_hpRNA_glial_mHTT	8.76409	speed		4	3	9564 glial_mHTT	10.0209	speed
6	9	Non_targeting_hpRNA_glial_mHTT	7.15761	speed		4	4	9564 glial_mHTT	12.0005	speed
6	10	Non_targeting_hpRNA_glial_mHTT	5.57106	speed		4	5	9564 glial_mHTT	12.4406	speed
6	11	Non_targeting_hpRNA_glial_mHTT	8.34557	speed		5	1	9564 glial_mHTT	11.897	speed
6	12	Non_targeting_hpRNA_glial_mHTT	7.48858	speed		5	2	9564 glial_mHTT	13.0846	speed
7	1	Non_targeting_hpRNA_glial_mHTT	5.15296	speed		5	3	9564 glial_mHTT	12.8444	speed
7	2	Non_targeting_hpRNA_glial_mHTT	5.49355	speed		5	4	9564 glial_mHTT	14.0405	speed
7	3	Non_targeting_hpRNA_glial_mHTT	7.10943	speed		5	5	9564 glial_mHTT	13.4659	speed
7	4	Non_targeting_hpRNA_glial_mHTT	5.08651	speed		6	1	9564 glial_mHTT	13.6613	speed
7	5	Non_targeting_hpRNA_glial_mHTT	8.03852	speed		6	2	9564 glial_mHTT	11.8871	speed
7	6	Non_targeting_hpRNA_glial_mHTT	6.71318	speed		6	3	9564 glial_mHTT	13.1149	speed
7	7	Non_targeting_hpRNA_glial_mHTT	5.39868	speed		6	4	9564 glial_mHTT	12.9347	speed
7	8	Non_targeting_hpRNA_glial_mHTT	4.13079	speed		6	5	9564 glial_mHTT	12.3611	speed
7	9	Non_targeting_hpRNA_glial_mHTT	3.83695	speed		7	1	9564 glial_mHTT	10.45	speed
7	10	Non_targeting_hpRNA_glial_mHTT	6.06921	speed		7	2	9564 glial_mHTT	11.312	speed
7	11	Non_targeting_hpRNA_glial_mHTT	7.01544	speed		7	3	9564 glial_mHTT	9.17605	speed
7	12	Non_targeting_hpRNA_glial_mHTT	6.54443	speed		7	4	9564 glial_mHTT	11.7321	speed
8	1	Non_targeting_hpRNA_glial_mHTT	5.22323	speed		7	5	9564 glial_mHTT	10.3429	speed
8	2	Non_targeting_hpRNA_glial_mHTT	3.29092	speed		8	1	9564 glial_mHTT	11.3273	speed
8	3	Non_targeting_hpRNA_glial_mHTT	5.70368	speed		8	2	9564 glial_mHTT	11.2664	speed
8	4	Non_targeting_hpRNA_glial_mHTT	5.34644	speed		8	3	9564 glial_mHTT	9.16495	speed
8	5	Non_targeting_hpRNA_glial_mHTT	6.39656	speed		8	4	9564 glial_mHTT	10.7034	speed
8	6	Non_targeting_hpRNA_glial_mHTT	5.25645	speed		8	5	9564 glial_mHTT	10.5118	speed
8	7	Non_targeting_hpRNA_glial_mHTT	5.47871	speed		9	1	9564 glial_mHTT	8.62718	speed
8	8	Non_targeting_hpRNA_glial_mHTT	4.48981	speed		9	2	9564 glial_mHTT	10.2644	speed
8	9	Non_targeting_hpRNA_glial_mHTT	4.60025	speed		9	3	9564 glial_mHTT	8.52842	speed
8	10	Non_targeting_hpRNA_glial_mHTT	4.43493	speed		9	4	9564 glial_mHTT	9.87007	speed
8	11	Non_targeting_hpRNA_glial_mHTT	6.15956	speed		9	5	9564 glial_mHTT	7.85349	speed
8	12	Non_targeting_hpRNA_glial_mHTT	5.21209	speed		10	1	9564 glial_mHTT	6.9104	speed
9	1	Non_targeting_hpRNA_glial_mHTT	3.84217	speed		10	2	9564 glial_mHTT	6.28888	speed
9	2	Non_targeting_hpRNA_glial_mHTT	3.05963	speed		10	3	9564 glial_mHTT	9.07094	speed
9	3	Non_targeting_hpRNA_glial_mHTT	5.53149	speed		10	4	9564 glial_mHTT	9.44692	speed
9	4	Non_targeting_hpRNA_glial_mHTT	5.33735	speed		10	5	9564 glial_mHTT	9.02255	speed
10	5	Non_targeting_hpRNA_glial_mHTT	2.05354	speed
10	6	Non_targeting_hpRNA_glial_mHTT	3.24662	speed
10	7	Non_targeting_hpRNA_glial_mHTT	4.79695	speed
10	8	Non_targeting_hpRNA_glial_mHTT	3.17863	speed
10	9	Non_targeting_hpRNA_glial_mHTT	4.60528	speed
10	12	Non_targeting_hpRNA_glial_mHTT	3.62806	speed
1	1	v100271_glial_mHTT	11.3974	speed
1	2	v100271_glial_mHTT	11.9054	speed
1	3	v100271_glial_mHTT	12.1142	speed
1	4	v100271_glial_mHTT	12.1248	speed
1	5	v100271_glial_mHTT	10.6399	speed
2	1	v100271_glial_mHTT	11.0338	speed
2	2	v100271_glial_mHTT	11.4253	speed
2	3	v100271_glial_mHTT	11.647	speed
2	4	v100271_glial_mHTT	11.4252	speed
2	5	v100271_glial_mHTT	11.5809	speed
3	1	v100271_glial_mHTT	10.045	speed
3	2	v100271_glial_mHTT	10.8582	speed
3	3	v100271_glial_mHTT	11.4461	speed
3	4	v100271_glial_mHTT	10.9724	speed
3	5	v100271_glial_mHTT	11.1288	speed
4	1	v100271_glial_mHTT	8.08975	speed
4	2	v100271_glial_mHTT	10.4378	speed
4	3	v100271_glial_mHTT	10.3798	speed
4	4	v100271_glial_mHTT	10.5568	speed
4	5	v100271_glial_mHTT	9.11847	speed
5	1	v100271_glial_mHTT	9.99124	speed
5	2	v100271_glial_mHTT	10.0398	speed
5	3	v100271_glial_mHTT	9.09946	speed
5	4	v100271_glial_mHTT	9.77792	speed
5	5	v100271_glial_mHTT	9.06271	speed
6	1	v100271_glial_mHTT	7.98047	speed
6	2	v100271_glial_mHTT	8.51228	speed
6	3	v100271_glial_mHTT	8.14249	speed
6	4	v100271_glial_mHTT	8.65882	speed
6	5	v100271_glial_mHTT	8.34236	speed
7	1	v100271_glial_mHTT	6.88653	speed
7	2	v100271_glial_mHTT	8.85672	speed
7	3	v100271_glial_mHTT	6.55102	speed
7	4	v100271_glial_mHTT	6.3738	speed
7	5	v100271_glial_mHTT	9.82849	speed
8	1	v100271_glial_mHTT	6.79727	speed
8	2	v100271_glial_mHTT	6.70872	speed
8	3	v100271_glial_mHTT	6.44065	speed
8	4	v100271_glial_mHTT	7.73762	speed
8	5	v100271_glial_mHTT	6.22821	speed
9	1	v100271_glial_mHTT	5.9727	speed
9	2	v100271_glial_mHTT	7.21412	speed
9	3	v100271_glial_mHTT	5.25467	speed
9	4	v100271_glial_mHTT	6.34859	speed
9	5	v100271_glial_mHTT	7.24337	speed

## Sheet: LRRTM1
caps BDSC 34298						caps BDSC 41393
Trialday	Replicate	Genotype	Observation	Metric		Trialday	Replicate	Genotype	Observation	Metric
1	1	Non_targeting_hpRNA_glial_mHTT	12.186	speed		2	1	Non_targeting_hpRNA_glial_mHTT	14.2278	speed
1	2	Non_targeting_hpRNA_glial_mHTT	12.7909	speed		2	2	Non_targeting_hpRNA_glial_mHTT	15.5571	speed
2	1	Non_targeting_hpRNA_glial_mHTT	11.6151	speed		2	3	Non_targeting_hpRNA_glial_mHTT	14.5411	speed
2	2	Non_targeting_hpRNA_glial_mHTT	12.1219	speed		3	1	Non_targeting_hpRNA_glial_mHTT	12.1723	speed
3	1	Non_targeting_hpRNA_glial_mHTT	9.94744	speed		3	2	Non_targeting_hpRNA_glial_mHTT	12.2934	speed
3	2	Non_targeting_hpRNA_glial_mHTT	11.7971	speed		3	3	Non_targeting_hpRNA_glial_mHTT	9.53973	speed
4	1	Non_targeting_hpRNA_glial_mHTT	9.85299	speed		4	1	Non_targeting_hpRNA_glial_mHTT	8.78102	speed
4	2	Non_targeting_hpRNA_glial_mHTT	10.6864	speed		4	2	Non_targeting_hpRNA_glial_mHTT	10.7369	speed
5	1	Non_targeting_hpRNA_glial_mHTT	5.32302	speed		4	3	Non_targeting_hpRNA_glial_mHTT	9.95084	speed
5	2	Non_targeting_hpRNA_glial_mHTT	10.4062	speed		5	1	Non_targeting_hpRNA_glial_mHTT	5.73557	speed
6	1	Non_targeting_hpRNA_glial_mHTT	1.35658	speed		5	2	Non_targeting_hpRNA_glial_mHTT	9.92094	speed
6	2	Non_targeting_hpRNA_glial_mHTT	6.91932	speed		5	3	Non_targeting_hpRNA_glial_mHTT	10.0181	speed
7	1	Non_targeting_hpRNA_glial_mHTT	8.64577	speed		6	1	Non_targeting_hpRNA_glial_mHTT	4.91453	speed
7	2	Non_targeting_hpRNA_glial_mHTT	8.6402	speed		6	2	Non_targeting_hpRNA_glial_mHTT	9.42369	speed
8	1	Non_targeting_hpRNA_glial_mHTT	5.00066	speed		6	3	Non_targeting_hpRNA_glial_mHTT	9.29628	speed
8	2	Non_targeting_hpRNA_glial_mHTT	6.39159	speed		7	1	Non_targeting_hpRNA_glial_mHTT	4.65538	speed
1	3	Non_targeting_hpRNA_glial_mHTT	11.5646	speed		7	2	Non_targeting_hpRNA_glial_mHTT	4.87125	speed
1	4	Non_targeting_hpRNA_glial_mHTT	10.6456	speed		7	3	Non_targeting_hpRNA_glial_mHTT	8.14019	speed
1	5	Non_targeting_hpRNA_glial_mHTT	8.89028	speed		8	1	Non_targeting_hpRNA_glial_mHTT	3.44567	speed
2	3	Non_targeting_hpRNA_glial_mHTT	9.55612	speed		8	2	Non_targeting_hpRNA_glial_mHTT	5.02795	speed
2	4	Non_targeting_hpRNA_glial_mHTT	12.9619	speed		8	3	Non_targeting_hpRNA_glial_mHTT	4.10722	speed
2	5	Non_targeting_hpRNA_glial_mHTT	12.984	speed		9	1	Non_targeting_hpRNA_glial_mHTT	6.6524	speed
3	3	Non_targeting_hpRNA_glial_mHTT	9.64493	speed		9	2	Non_targeting_hpRNA_glial_mHTT	7.84532	speed
3	4	Non_targeting_hpRNA_glial_mHTT	12.1723	speed		9	3	Non_targeting_hpRNA_glial_mHTT	7.73044	speed
3	5	Non_targeting_hpRNA_glial_mHTT	10.8503	speed		10	1	Non_targeting_hpRNA_glial_mHTT	3.7822	speed
4	3	Non_targeting_hpRNA_glial_mHTT	7.78815	speed		10	2	Non_targeting_hpRNA_glial_mHTT	3.05975	speed
4	4	Non_targeting_hpRNA_glial_mHTT	6.44811	speed		10	3	Non_targeting_hpRNA_glial_mHTT	6.99881	speed
4	5	Non_targeting_hpRNA_glial_mHTT	10.727	speed		2	4	Non_targeting_hpRNA_glial_mHTT	11.6946	speed
5	3	Non_targeting_hpRNA_glial_mHTT	7.63764	speed		2	5	Non_targeting_hpRNA_glial_mHTT	12.322	speed
5	4	Non_targeting_hpRNA_glial_mHTT	9.00362	speed		2	6	Non_targeting_hpRNA_glial_mHTT	11.7243	speed
5	5	Non_targeting_hpRNA_glial_mHTT	6.61344	speed		2	7	Non_targeting_hpRNA_glial_mHTT	11.9576	speed
6	3	Non_targeting_hpRNA_glial_mHTT	7.03368	speed		2	8	Non_targeting_hpRNA_glial_mHTT	10.4241	speed
6	4	Non_targeting_hpRNA_glial_mHTT	8.17837	speed		2	9	Non_targeting_hpRNA_glial_mHTT	11.88	speed
6	5	Non_targeting_hpRNA_glial_mHTT	4.80799	speed		3	4	Non_targeting_hpRNA_glial_mHTT	11.9101	speed
7	3	Non_targeting_hpRNA_glial_mHTT	3.50538	speed		3	5	Non_targeting_hpRNA_glial_mHTT	12.1479	speed
7	4	Non_targeting_hpRNA_glial_mHTT	5.17438	speed		3	6	Non_targeting_hpRNA_glial_mHTT	12.3648	speed
7	5	Non_targeting_hpRNA_glial_mHTT	1.83189	speed		3	7	Non_targeting_hpRNA_glial_mHTT	13.3803	speed
8	3	Non_targeting_hpRNA_glial_mHTT	5.40236	speed		3	8	Non_targeting_hpRNA_glial_mHTT	10.8529	speed
8	4	Non_targeting_hpRNA_glial_mHTT	4.93599	speed		3	9	Non_targeting_hpRNA_glial_mHTT	11.6781	speed
8	5	Non_targeting_hpRNA_glial_mHTT	5.66823	speed		4	4	Non_targeting_hpRNA_glial_mHTT	8.41563	speed
9	3	Non_targeting_hpRNA_glial_mHTT	2.16147	speed		4	5	Non_targeting_hpRNA_glial_mHTT	11.4763	speed
9	4	Non_targeting_hpRNA_glial_mHTT	2.57011	speed		4	6	Non_targeting_hpRNA_glial_mHTT	10.7076	speed
9	5	Non_targeting_hpRNA_glial_mHTT	1.9203	speed		4	7	Non_targeting_hpRNA_glial_mHTT	10.2271	speed
1	6	Non_targeting_hpRNA_glial_mHTT	10.9354	speed		4	8	Non_targeting_hpRNA_glial_mHTT	10.6616	speed
2	6	Non_targeting_hpRNA_glial_mHTT	11.6443	speed		4	9	Non_targeting_hpRNA_glial_mHTT	10.7341	speed
3	6	Non_targeting_hpRNA_glial_mHTT	13.4473	speed		5	4	Non_targeting_hpRNA_glial_mHTT	7.73139	speed
4	6	Non_targeting_hpRNA_glial_mHTT	9.2254	speed		5	5	Non_targeting_hpRNA_glial_mHTT	8.67637	speed
5	6	Non_targeting_hpRNA_glial_mHTT	11.5363	speed		5	6	Non_targeting_hpRNA_glial_mHTT	8.29841	speed
6	6	Non_targeting_hpRNA_glial_mHTT	4.02543	speed		5	7	Non_targeting_hpRNA_glial_mHTT	5.94291	speed
7	6	Non_targeting_hpRNA_glial_mHTT	2.12227	speed		5	8	Non_targeting_hpRNA_glial_mHTT	7.57793	speed
8	6	Non_targeting_hpRNA_glial_mHTT	4.74043	speed		5	9	Non_targeting_hpRNA_glial_mHTT	9.04111	speed
9	6	Non_targeting_hpRNA_glial_mHTT	4.6059	speed		6	4	Non_targeting_hpRNA_glial_mHTT	7.13998	speed
1	1	siHTT_glial_mHTT	12.5356	speed		6	5	Non_targeting_hpRNA_glial_mHTT	8.83237	speed
1	2	siHTT_glial_mHTT	11.4488	speed		6	6	Non_targeting_hpRNA_glial_mHTT	7.65282	speed
2	1	siHTT_glial_mHTT	12.1656	speed		6	7	Non_targeting_hpRNA_glial_mHTT	7.90555	speed
2	2	siHTT_glial_mHTT	13.2191	speed		6	8	Non_targeting_hpRNA_glial_mHTT	8.78279	speed
3	1	siHTT_glial_mHTT	13.6606	speed		6	9	Non_targeting_hpRNA_glial_mHTT	9.46893	speed
3	2	siHTT_glial_mHTT	11.9763	speed		7	4	Non_targeting_hpRNA_glial_mHTT	5.6189	speed
4	1	siHTT_glial_mHTT	13.0399	speed		7	5	Non_targeting_hpRNA_glial_mHTT	5.35695	speed
4	2	siHTT_glial_mHTT	10.0979	speed		7	6	Non_targeting_hpRNA_glial_mHTT	6.16701	speed
5	1	siHTT_glial_mHTT	13.4475	speed		7	7	Non_targeting_hpRNA_glial_mHTT	6.5794	speed
5	2	siHTT_glial_mHTT	11.978	speed		7	8	Non_targeting_hpRNA_glial_mHTT	3.15871	speed
6	1	siHTT_glial_mHTT	13.5401	speed		7	9	Non_targeting_hpRNA_glial_mHTT	6.84853	speed
6	2	siHTT_glial_mHTT	11.5133	speed		8	4	Non_targeting_hpRNA_glial_mHTT	3.70587	speed
7	1	siHTT_glial_mHTT	12.4868	speed		8	5	Non_targeting_hpRNA_glial_mHTT	5.43729	speed
7	2	siHTT_glial_mHTT	12.7704	speed		8	6	Non_targeting_hpRNA_glial_mHTT	4.08136	speed
8	1	siHTT_glial_mHTT	11.8278	speed		8	7	Non_targeting_hpRNA_glial_mHTT	6.7945	speed
8	2	siHTT_glial_mHTT	13.1025	speed		8	8	Non_targeting_hpRNA_glial_mHTT	5.31661	speed
1	2	siHTT_glial_mHTT	10.2567	speed		8	9	Non_targeting_hpRNA_glial_mHTT	5.52046	speed
1	3	siHTT_glial_mHTT	9.56936	speed		9	4	Non_targeting_hpRNA_glial_mHTT	4.34657	speed
1	4	siHTT_glial_mHTT	11.8178	speed		9	5	Non_targeting_hpRNA_glial_mHTT	2.85177	speed
2	2	siHTT_glial_mHTT	12.7563	speed		9	6	Non_targeting_hpRNA_glial_mHTT	4.6864	speed
2	3	siHTT_glial_mHTT	13.1716	speed		9	7	Non_targeting_hpRNA_glial_mHTT	4.86627	speed
2	4	siHTT_glial_mHTT	13.6013	speed		9	8	Non_targeting_hpRNA_glial_mHTT	5.56095	speed
3	2	siHTT_glial_mHTT	14.3955	speed		9	9	Non_targeting_hpRNA_glial_mHTT	5.22565	speed
3	3	siHTT_glial_mHTT	12.5809	speed		10	4	Non_targeting_hpRNA_glial_mHTT	5.04009	speed
3	4	siHTT_glial_mHTT	13.2191	speed		10	5	Non_targeting_hpRNA_glial_mHTT	6.0648	speed
4	2	siHTT_glial_mHTT	13.2839	speed		10	6	Non_targeting_hpRNA_glial_mHTT	5.77228	speed
4	3	siHTT_glial_mHTT	13.8132	speed		10	7	Non_targeting_hpRNA_glial_mHTT	5.35377	speed
4	4	siHTT_glial_mHTT	12.4869	speed		10	8	Non_targeting_hpRNA_glial_mHTT	6.00173	speed
5	2	siHTT_glial_mHTT	13.31	speed		10	9	Non_targeting_hpRNA_glial_mHTT	5.95935	speed
5	3	siHTT_glial_mHTT	10.8609	speed		2	1	siHTT_glial_mHTT	13.2992	speed
5	4	siHTT_glial_mHTT	13.15	speed		2	2	siHTT_glial_mHTT	13.3696	speed
6	2	siHTT_glial_mHTT	10.7814	speed		2	3	siHTT_glial_mHTT	13.4244	speed
6	3	siHTT_glial_mHTT	14.081	speed		3	1	siHTT_glial_mHTT	12.2189	speed
6	4	siHTT_glial_mHTT	13.5522	speed		3	2	siHTT_glial_mHTT	15.1816	speed
7	2	siHTT_glial_mHTT	12.7851	speed		3	3	siHTT_glial_mHTT	13.605	speed
7	3	siHTT_glial_mHTT	12.3284	speed		4	1	siHTT_glial_mHTT	9.0569	speed
7	4	siHTT_glial_mHTT	11.6353	speed		4	2	siHTT_glial_mHTT	11.138	speed
8	2	siHTT_glial_mHTT	12.551	speed		4	3	siHTT_glial_mHTT	11.5359	speed
8	3	siHTT_glial_mHTT	12.3522	speed		5	1	siHTT_glial_mHTT	10.8251	speed
8	4	siHTT_glial_mHTT	11.9198	speed		5	2	siHTT_glial_mHTT	12.4236	speed
9	2	siHTT_glial_mHTT	12.8324	speed		5	3	siHTT_glial_mHTT	11.2458	speed
9	3	siHTT_glial_mHTT	12.288	speed		6	1	siHTT_glial_mHTT	11.8401	speed
9	4	siHTT_glial_mHTT	11.3166	speed		6	2	siHTT_glial_mHTT	13.5891	speed
1	5	siHTT_glial_mHTT	11.3322	speed		6	3	siHTT_glial_mHTT	12.2754	speed
1	6	siHTT_glial_mHTT	11.6054	speed		7	1	siHTT_glial_mHTT	11.1653	speed
1	7	siHTT_glial_mHTT	10.7686	speed		7	2	siHTT_glial_mHTT	11.6307	speed
2	5	siHTT_glial_mHTT	11.9043	speed		7	3	siHTT_glial_mHTT	11.1752	speed
2	6	siHTT_glial_mHTT	11.5123	speed		8	1	siHTT_glial_mHTT	12.4244	speed
2	7	siHTT_glial_mHTT	5.13955	speed		8	2	siHTT_glial_mHTT	12.1311	speed
3	5	siHTT_glial_mHTT	14.1215	speed		8	3	siHTT_glial_mHTT	11.0372	speed
3	6	siHTT_glial_mHTT	14.713	speed		9	1	siHTT_glial_mHTT	11.8206	speed
3	7	siHTT_glial_mHTT	12.4855	speed		9	2	siHTT_glial_mHTT	10.974	speed
4	5	siHTT_glial_mHTT	13.1075	speed		9	3	siHTT_glial_mHTT	11.8046	speed
4	6	siHTT_glial_mHTT	12.9115	speed		10	1	siHTT_glial_mHTT	12.2077	speed
4	7	siHTT_glial_mHTT	13.2786	speed		10	2	siHTT_glial_mHTT	11.9961	speed
5	5	siHTT_glial_mHTT	12.6432	speed		10	3	siHTT_glial_mHTT	11.2358	speed
5	6	siHTT_glial_mHTT	10.2839	speed		2	4	siHTT_glial_mHTT	12.0412	speed
5	7	siHTT_glial_mHTT	11.408	speed		2	5	siHTT_glial_mHTT	13.1155	speed
6	5	siHTT_glial_mHTT	13.2561	speed		2	6	siHTT_glial_mHTT	13.2336	speed
6	6	siHTT_glial_mHTT	12.3061	speed		2	7	siHTT_glial_mHTT	11.8445	speed
6	7	siHTT_glial_mHTT	11.9249	speed		2	8	siHTT_glial_mHTT	12.1505	speed
7	5	siHTT_glial_mHTT	12.5336	speed		3	4	siHTT_glial_mHTT	13.8722	speed
7	6	siHTT_glial_mHTT	11.9912	speed		3	5	siHTT_glial_mHTT	13.3553	speed
7	7	siHTT_glial_mHTT	11.0928	speed		3	6	siHTT_glial_mHTT	12.6795	speed
8	5	siHTT_glial_mHTT	12.2642	speed		3	7	siHTT_glial_mHTT	12.2869	speed
8	6	siHTT_glial_mHTT	14.0586	speed		3	8	siHTT_glial_mHTT	12.6874	speed
8	7	siHTT_glial_mHTT	11.0016	speed		4	4	siHTT_glial_mHTT	12.913	speed
9	5	siHTT_glial_mHTT	9.9565	speed		4	5	siHTT_glial_mHTT	12.3921	speed
9	6	siHTT_glial_mHTT	12.5028	speed		4	6	siHTT_glial_mHTT	11.0439	speed
9	7	siHTT_glial_mHTT	9.82817	speed		4	7	siHTT_glial_mHTT	10.6887	speed
1	1	34298 glial_mHTT	11.0069	speed		4	8	siHTT_glial_mHTT	11.7876	speed
1	2	34298 glial_mHTT	9.16395	speed		5	4	siHTT_glial_mHTT	11.9177	speed
1	3	34298 glial_mHTT	10.4659	speed		5	5	siHTT_glial_mHTT	12.4605	speed
1	4	34298 glial_mHTT	11.6136	speed		5	6	siHTT_glial_mHTT	11.0883	speed
1	5	34298 glial_mHTT	11.8419	speed		5	7	siHTT_glial_mHTT	11.2689	speed
2	1	34298 glial_mHTT	13.8763	speed		5	8	siHTT_glial_mHTT	11.3274	speed
2	2	34298 glial_mHTT	13.6802	speed		6	4	siHTT_glial_mHTT	11.056	speed
2	3	34298 glial_mHTT	14.2127	speed		6	5	siHTT_glial_mHTT	11.9035	speed
2	4	34298 glial_mHTT	13.4556	speed		6	6	siHTT_glial_mHTT	10.2836	speed
2	5	34298 glial_mHTT	13.4944	speed		6	7	siHTT_glial_mHTT	11.5262	speed
3	1	34298 glial_mHTT	13.983	speed		6	8	siHTT_glial_mHTT	13.6128	speed
3	2	34298 glial_mHTT	12.7035	speed		7	4	siHTT_glial_mHTT	10.765	speed
3	3	34298 glial_mHTT	13.7954	speed		7	5	siHTT_glial_mHTT	11.6304	speed
3	4	34298 glial_mHTT	12.7447	speed		7	6	siHTT_glial_mHTT	8.73746	speed
3	5	34298 glial_mHTT	12.1593	speed		7	7	siHTT_glial_mHTT	10.5596	speed
4	1	34298 glial_mHTT	13.4564	speed		7	8	siHTT_glial_mHTT	9.94202	speed
4	2	34298 glial_mHTT	11.9445	speed		8	4	siHTT_glial_mHTT	11.6355	speed
4	3	34298 glial_mHTT	13.4413	speed		8	5	siHTT_glial_mHTT	12.9402	speed
4	4	34298 glial_mHTT	12.7004	speed		8	6	siHTT_glial_mHTT	10.6889	speed
4	5	34298 glial_mHTT	11.4626	speed		8	7	siHTT_glial_mHTT	9.80732	speed
5	1	34298 glial_mHTT	10.4989	speed		8	8	siHTT_glial_mHTT	11.5471	speed
5	2	34298 glial_mHTT	13.1435	speed		9	4	siHTT_glial_mHTT	11.4795	speed
5	3	34298 glial_mHTT	14.0579	speed		9	5	siHTT_glial_mHTT	12.4085	speed
5	4	34298 glial_mHTT	13.4564	speed		9	6	siHTT_glial_mHTT	9.7591	speed
5	5	34298 glial_mHTT	10.7712	speed		9	7	siHTT_glial_mHTT	10.2836	speed
6	1	34298 glial_mHTT	15.6675	speed		9	8	siHTT_glial_mHTT	11.8668	speed
6	2	34298 glial_mHTT	14.5297	speed		10	4	siHTT_glial_mHTT	13.3354	speed
6	3	34298 glial_mHTT	13.8623	speed		10	5	siHTT_glial_mHTT	9.84851	speed
6	4	34298 glial_mHTT	10.6701	speed		10	6	siHTT_glial_mHTT	12.4092	speed
6	5	34298 glial_mHTT	10.3803	speed		10	7	siHTT_glial_mHTT	11.8995	speed
7	1	34298 glial_mHTT	12.6453	speed		10	8	siHTT_glial_mHTT	13.2458	speed
7	2	34298 glial_mHTT	12.0288	speed		2	1	41393 glial_mHTT	15.5548	speed
7	3	34298 glial_mHTT	11.0939	speed		2	2	41393 glial_mHTT	16.8602	speed
7	4	34298 glial_mHTT	10.6025	speed		3	1	41393 glial_mHTT	14.7034	speed
7	5	34298 glial_mHTT	9.48466	speed		3	2	41393 glial_mHTT	16.3166	speed
8	1	34298 glial_mHTT	13.2321	speed		4	1	41393 glial_mHTT	12.822	speed
8	2	34298 glial_mHTT	11.2499	speed		4	2	41393 glial_mHTT	13.4684	speed
8	3	34298 glial_mHTT	9.42819	speed		5	1	41393 glial_mHTT	12.1395	speed
8	4	34298 glial_mHTT	10.0813	speed		5	2	41393 glial_mHTT	12.6119	speed
8	5	34298 glial_mHTT	7.34166	speed		6	1	41393 glial_mHTT	12.9848	speed
9	1	34298 glial_mHTT	12.4445	speed		6	2	41393 glial_mHTT	12.772	speed
9	2	34298 glial_mHTT	11.6035	speed		7	1	41393 glial_mHTT	10.9522	speed
9	3	34298 glial_mHTT	9.36208	speed		7	2	41393 glial_mHTT	9.79103	speed
9	4	34298 glial_mHTT	10.7195	speed		8	1	41393 glial_mHTT	7.08383	speed
9	5	34298 glial_mHTT	9.85128	speed		8	2	41393 glial_mHTT	8.90828	speed
						9	1	41393 glial_mHTT	10.2541	speed
						9	2	41393 glial_mHTT	11.286	speed
						10	1	41393 glial_mHTT	5.94641	speed
						10	2	41393 glial_mHTT	6.9044	speed
						2	3	41393 glial_mHTT	13.4642	speed
						2	4	41393 glial_mHTT	12.4516	speed
						3	3	41393 glial_mHTT	13.3219	speed
						3	4	41393 glial_mHTT	13.1262	speed
						4	3	41393 glial_mHTT	13.1463	speed
						4	4	41393 glial_mHTT	13.0561	speed
						5	3	41393 glial_mHTT	11.797	speed
						5	4	41393 glial_mHTT	9.04384	speed
						6	3	41393 glial_mHTT	13.2147	speed
						6	4	41393 glial_mHTT	12.9739	speed
						7	3	41393 glial_mHTT	10.3475	speed
						7	4	41393 glial_mHTT	7.82929	speed
						8	3	41393 glial_mHTT	9.54266	speed
						8	4	41393 glial_mHTT	8.52299	speed
						9	3	41393 glial_mHTT	8.21627	speed
						9	4	41393 glial_mHTT	7.94586	speed
						10	3	41393 glial_mHTT	6.31185	speed
						10	4	41393 glial_mHTT	9.53477	speed

## Sheet: NLGN
CG9287 BDSC 16592						nlg3 BDSC 18367						CG30095 VDRC 102216						Glt BDSC 22539
Trialday	Replicate	Genotype	Observation	Metric		Trialday	Replicate	Genotype	Observation	Metric		Trialday	Replicate	Genotype	Observation	Metric		Trialday	Replicate	Genotype	Observation	Metric
1	1	Non_targeting_hpRNA_glial_mHTT	12.186	speed		1	1	Non_targeting_hpRNA_glial_mHTT	12.186	speed		1	1	siHTT_glial_mHTT	10.105	xspeed		1	1	Non_targeting_hpRNA_glial_mHTT	12.186	speed
1	2	Non_targeting_hpRNA_glial_mHTT	12.7909	speed		1	2	Non_targeting_hpRNA_glial_mHTT	12.7909	speed		2	1	siHTT_glial_mHTT	10.982	xspeed		1	2	Non_targeting_hpRNA_glial_mHTT	12.7909	speed
2	1	Non_targeting_hpRNA_glial_mHTT	11.6151	speed		2	1	Non_targeting_hpRNA_glial_mHTT	11.6151	speed		3	1	siHTT_glial_mHTT	10.329	xspeed		2	1	Non_targeting_hpRNA_glial_mHTT	11.6151	speed
2	2	Non_targeting_hpRNA_glial_mHTT	12.1219	speed		2	2	Non_targeting_hpRNA_glial_mHTT	12.1219	speed		4	1	siHTT_glial_mHTT	10.9243	xspeed		2	2	Non_targeting_hpRNA_glial_mHTT	12.1219	speed
3	1	Non_targeting_hpRNA_glial_mHTT	9.94744	speed		3	1	Non_targeting_hpRNA_glial_mHTT	9.94744	speed		5	1	siHTT_glial_mHTT	8.32555	xspeed		3	1	Non_targeting_hpRNA_glial_mHTT	9.94744	speed
3	2	Non_targeting_hpRNA_glial_mHTT	11.7971	speed		3	2	Non_targeting_hpRNA_glial_mHTT	11.7971	speed		6	1	siHTT_glial_mHTT	9.69869	xspeed		3	2	Non_targeting_hpRNA_glial_mHTT	11.7971	speed
4	1	Non_targeting_hpRNA_glial_mHTT	9.85299	speed		4	1	Non_targeting_hpRNA_glial_mHTT	9.85299	speed		7	1	siHTT_glial_mHTT	10.2008	xspeed		4	1	Non_targeting_hpRNA_glial_mHTT	9.85299	speed
4	2	Non_targeting_hpRNA_glial_mHTT	10.6864	speed		4	2	Non_targeting_hpRNA_glial_mHTT	10.6864	speed		8	1	siHTT_glial_mHTT	8.82144	xspeed		4	2	Non_targeting_hpRNA_glial_mHTT	10.6864	speed
5	1	Non_targeting_hpRNA_glial_mHTT	5.32302	speed		5	1	Non_targeting_hpRNA_glial_mHTT	5.32302	speed		9	1	siHTT_glial_mHTT	9.41132	xspeed		5	1	Non_targeting_hpRNA_glial_mHTT	5.32302	speed
5	2	Non_targeting_hpRNA_glial_mHTT	10.4062	speed		5	2	Non_targeting_hpRNA_glial_mHTT	10.4062	speed		1	2	siHTT_glial_mHTT	9.65869	xspeed		5	2	Non_targeting_hpRNA_glial_mHTT	10.4062	speed
6	1	Non_targeting_hpRNA_glial_mHTT	1.35658	speed		6	1	Non_targeting_hpRNA_glial_mHTT	1.35658	speed		1	3	siHTT_glial_mHTT	10.6846	xspeed		6	1	Non_targeting_hpRNA_glial_mHTT	1.35658	speed
6	2	Non_targeting_hpRNA_glial_mHTT	6.91932	speed		6	2	Non_targeting_hpRNA_glial_mHTT	6.91932	speed		1	4	siHTT_glial_mHTT	10.9658	xspeed		6	2	Non_targeting_hpRNA_glial_mHTT	6.91932	speed
7	1	Non_targeting_hpRNA_glial_mHTT	8.64577	speed		7	1	Non_targeting_hpRNA_glial_mHTT	8.64577	speed		1	5	siHTT_glial_mHTT	10.8027	xspeed		7	1	Non_targeting_hpRNA_glial_mHTT	8.64577	speed
7	2	Non_targeting_hpRNA_glial_mHTT	8.6402	speed		7	2	Non_targeting_hpRNA_glial_mHTT	8.6402	speed		1	6	siHTT_glial_mHTT	9.23031	xspeed		7	2	Non_targeting_hpRNA_glial_mHTT	8.6402	speed
8	1	Non_targeting_hpRNA_glial_mHTT	5.00066	speed		8	1	Non_targeting_hpRNA_glial_mHTT	5.00066	speed		1	7	siHTT_glial_mHTT	9.75995	xspeed		8	1	Non_targeting_hpRNA_glial_mHTT	5.00066	speed
8	2	Non_targeting_hpRNA_glial_mHTT	6.39159	speed		8	2	Non_targeting_hpRNA_glial_mHTT	6.39159	speed		1	8	siHTT_glial_mHTT	8.94491	xspeed		8	2	Non_targeting_hpRNA_glial_mHTT	6.39159	speed
1	3	Non_targeting_hpRNA_glial_mHTT	11.5646	speed		1	3	Non_targeting_hpRNA_glial_mHTT	11.5646	speed		1	9	siHTT_glial_mHTT	9.44192	xspeed		1	3	Non_targeting_hpRNA_glial_mHTT	11.5646	speed
1	4	Non_targeting_hpRNA_glial_mHTT	10.6456	speed		1	4	Non_targeting_hpRNA_glial_mHTT	10.6456	speed		1	10	siHTT_glial_mHTT	11.0719	xspeed		1	4	Non_targeting_hpRNA_glial_mHTT	10.6456	speed
1	5	Non_targeting_hpRNA_glial_mHTT	8.89028	speed		1	5	Non_targeting_hpRNA_glial_mHTT	8.89028	speed		1	11	siHTT_glial_mHTT	11.3592	xspeed		1	5	Non_targeting_hpRNA_glial_mHTT	8.89028	speed
2	3	Non_targeting_hpRNA_glial_mHTT	9.55612	speed		2	3	Non_targeting_hpRNA_glial_mHTT	9.55612	speed		2	2	siHTT_glial_mHTT	11.1493	xspeed		2	3	Non_targeting_hpRNA_glial_mHTT	9.55612	speed
2	4	Non_targeting_hpRNA_glial_mHTT	12.9619	speed		2	4	Non_targeting_hpRNA_glial_mHTT	12.9619	speed		2	3	siHTT_glial_mHTT	12.7509	xspeed		2	4	Non_targeting_hpRNA_glial_mHTT	12.9619	speed
2	5	Non_targeting_hpRNA_glial_mHTT	12.984	speed		2	5	Non_targeting_hpRNA_glial_mHTT	12.984	speed		2	4	siHTT_glial_mHTT	10.4576	xspeed		2	5	Non_targeting_hpRNA_glial_mHTT	12.984	speed
3	3	Non_targeting_hpRNA_glial_mHTT	9.64493	speed		3	3	Non_targeting_hpRNA_glial_mHTT	9.64493	speed		2	5	siHTT_glial_mHTT	11.8353	xspeed		3	3	Non_targeting_hpRNA_glial_mHTT	9.64493	speed
3	4	Non_targeting_hpRNA_glial_mHTT	12.1723	speed		3	4	Non_targeting_hpRNA_glial_mHTT	12.1723	speed		2	6	siHTT_glial_mHTT	10.3507	xspeed		3	4	Non_targeting_hpRNA_glial_mHTT	12.1723	speed
3	5	Non_targeting_hpRNA_glial_mHTT	10.8503	speed		3	5	Non_targeting_hpRNA_glial_mHTT	10.8503	speed		2	7	siHTT_glial_mHTT	11.2264	xspeed		3	5	Non_targeting_hpRNA_glial_mHTT	10.8503	speed
4	3	Non_targeting_hpRNA_glial_mHTT	7.78815	speed		4	3	Non_targeting_hpRNA_glial_mHTT	7.78815	speed		2	8	siHTT_glial_mHTT	11.8598	xspeed		4	3	Non_targeting_hpRNA_glial_mHTT	7.78815	speed
4	4	Non_targeting_hpRNA_glial_mHTT	6.44811	speed		4	4	Non_targeting_hpRNA_glial_mHTT	6.44811	speed		2	9	siHTT_glial_mHTT	10.5634	xspeed		4	4	Non_targeting_hpRNA_glial_mHTT	6.44811	speed
4	5	Non_targeting_hpRNA_glial_mHTT	10.727	speed		4	5	Non_targeting_hpRNA_glial_mHTT	10.727	speed		2	10	siHTT_glial_mHTT	12.2519	xspeed		4	5	Non_targeting_hpRNA_glial_mHTT	10.727	speed
5	3	Non_targeting_hpRNA_glial_mHTT	7.63764	speed		5	3	Non_targeting_hpRNA_glial_mHTT	7.63764	speed		2	11	siHTT_glial_mHTT	11.3714	xspeed		5	3	Non_targeting_hpRNA_glial_mHTT	7.63764	speed
5	4	Non_targeting_hpRNA_glial_mHTT	9.00362	speed		5	4	Non_targeting_hpRNA_glial_mHTT	9.00362	speed		3	2	siHTT_glial_mHTT	10.6895	xspeed		5	4	Non_targeting_hpRNA_glial_mHTT	9.00362	speed
5	5	Non_targeting_hpRNA_glial_mHTT	6.61344	speed		5	5	Non_targeting_hpRNA_glial_mHTT	6.61344	speed		3	3	siHTT_glial_mHTT	11.9995	xspeed		5	5	Non_targeting_hpRNA_glial_mHTT	6.61344	speed
6	3	Non_targeting_hpRNA_glial_mHTT	7.03368	speed		6	3	Non_targeting_hpRNA_glial_mHTT	7.03368	speed		3	4	siHTT_glial_mHTT	10.4388	xspeed		6	3	Non_targeting_hpRNA_glial_mHTT	7.03368	speed
6	4	Non_targeting_hpRNA_glial_mHTT	8.17837	speed		6	4	Non_targeting_hpRNA_glial_mHTT	8.17837	speed		3	5	siHTT_glial_mHTT	12.6282	xspeed		6	4	Non_targeting_hpRNA_glial_mHTT	8.17837	speed
6	5	Non_targeting_hpRNA_glial_mHTT	4.80799	speed		6	5	Non_targeting_hpRNA_glial_mHTT	4.80799	speed		3	6	siHTT_glial_mHTT	11.1568	xspeed		6	5	Non_targeting_hpRNA_glial_mHTT	4.80799	speed
7	3	Non_targeting_hpRNA_glial_mHTT	3.50538	speed		7	3	Non_targeting_hpRNA_glial_mHTT	3.50538	speed		3	7	siHTT_glial_mHTT	10.8386	xspeed		7	3	Non_targeting_hpRNA_glial_mHTT	3.50538	speed
7	4	Non_targeting_hpRNA_glial_mHTT	5.17438	speed		7	4	Non_targeting_hpRNA_glial_mHTT	5.17438	speed		3	8	siHTT_glial_mHTT	11.6303	xspeed		7	4	Non_targeting_hpRNA_glial_mHTT	5.17438	speed
7	5	Non_targeting_hpRNA_glial_mHTT	1.83189	speed		7	5	Non_targeting_hpRNA_glial_mHTT	1.83189	speed		3	9	siHTT_glial_mHTT	10.9958	xspeed		7	5	Non_targeting_hpRNA_glial_mHTT	1.83189	speed
8	3	Non_targeting_hpRNA_glial_mHTT	5.40236	speed		8	3	Non_targeting_hpRNA_glial_mHTT	5.40236	speed		3	10	siHTT_glial_mHTT	11.7206	xspeed		8	3	Non_targeting_hpRNA_glial_mHTT	5.40236	speed
8	4	Non_targeting_hpRNA_glial_mHTT	4.93599	speed		8	4	Non_targeting_hpRNA_glial_mHTT	4.93599	speed		3	11	siHTT_glial_mHTT	12.3095	xspeed		8	4	Non_targeting_hpRNA_glial_mHTT	4.93599	speed
8	5	Non_targeting_hpRNA_glial_mHTT	5.66823	speed		8	5	Non_targeting_hpRNA_glial_mHTT	5.66823	speed		3	12	siHTT_glial_mHTT	11.8328	xspeed		8	5	Non_targeting_hpRNA_glial_mHTT	5.66823	speed
9	3	Non_targeting_hpRNA_glial_mHTT	2.16147	speed		9	3	Non_targeting_hpRNA_glial_mHTT	2.16147	speed		4	2	siHTT_glial_mHTT	11.7259	xspeed		9	3	Non_targeting_hpRNA_glial_mHTT	2.16147	speed
9	4	Non_targeting_hpRNA_glial_mHTT	2.57011	speed		9	4	Non_targeting_hpRNA_glial_mHTT	2.57011	speed		4	3	siHTT_glial_mHTT	12.2754	xspeed		9	4	Non_targeting_hpRNA_glial_mHTT	2.57011	speed
9	5	Non_targeting_hpRNA_glial_mHTT	1.9203	speed		9	5	Non_targeting_hpRNA_glial_mHTT	1.9203	speed		4	4	siHTT_glial_mHTT	10.2669	xspeed		9	5	Non_targeting_hpRNA_glial_mHTT	1.9203	speed
1	6	Non_targeting_hpRNA_glial_mHTT	10.9354	speed		1	6	Non_targeting_hpRNA_glial_mHTT	10.9354	speed		4	5	siHTT_glial_mHTT	4.90759	xspeed		1	6	Non_targeting_hpRNA_glial_mHTT	10.9354	speed
2	6	Non_targeting_hpRNA_glial_mHTT	11.6443	speed		2	6	Non_targeting_hpRNA_glial_mHTT	11.6443	speed		4	6	siHTT_glial_mHTT	11.3914	xspeed		2	6	Non_targeting_hpRNA_glial_mHTT	11.6443	speed
3	6	Non_targeting_hpRNA_glial_mHTT	13.4473	speed		3	6	Non_targeting_hpRNA_glial_mHTT	13.4473	speed		4	7	siHTT_glial_mHTT	10.3303	xspeed		3	6	Non_targeting_hpRNA_glial_mHTT	13.4473	speed
4	6	Non_targeting_hpRNA_glial_mHTT	9.2254	speed		4	6	Non_targeting_hpRNA_glial_mHTT	9.2254	speed		4	8	siHTT_glial_mHTT	11.8315	xspeed		4	6	Non_targeting_hpRNA_glial_mHTT	9.2254	speed
5	6	Non_targeting_hpRNA_glial_mHTT	11.5363	speed		5	6	Non_targeting_hpRNA_glial_mHTT	11.5363	speed		4	9	siHTT_glial_mHTT	11.208	xspeed		5	6	Non_targeting_hpRNA_glial_mHTT	11.5363	speed
6	6	Non_targeting_hpRNA_glial_mHTT	4.02543	speed		6	6	Non_targeting_hpRNA_glial_mHTT	4.02543	speed		4	10	siHTT_glial_mHTT	10.3256	xspeed		6	6	Non_targeting_hpRNA_glial_mHTT	4.02543	speed
7	6	Non_targeting_hpRNA_glial_mHTT	2.12227	speed		7	6	Non_targeting_hpRNA_glial_mHTT	2.12227	speed		4	11	siHTT_glial_mHTT	5.84269	xspeed		7	6	Non_targeting_hpRNA_glial_mHTT	2.12227	speed
8	6	Non_targeting_hpRNA_glial_mHTT	4.74043	speed		8	6	Non_targeting_hpRNA_glial_mHTT	4.74043	speed		4	12	siHTT_glial_mHTT	11.6801	xspeed		8	6	Non_targeting_hpRNA_glial_mHTT	4.74043	speed
9	6	Non_targeting_hpRNA_glial_mHTT	4.6059	speed		9	6	Non_targeting_hpRNA_glial_mHTT	4.6059	speed		5	2	siHTT_glial_mHTT	9.5808	xspeed		9	6	Non_targeting_hpRNA_glial_mHTT	4.6059	speed
1	1	siHTT_glial_mHTT	12.5356	speed		1	1	siHTT_glial_mHTT	12.5356	speed		5	3	siHTT_glial_mHTT	12.4461	xspeed		1	1	siHTT_glial_mHTT	12.5356	speed
1	2	siHTT_glial_mHTT	11.4488	speed		1	2	siHTT_glial_mHTT	11.4488	speed		5	4	siHTT_glial_mHTT	10.4076	xspeed		1	2	siHTT_glial_mHTT	11.4488	speed
2	1	siHTT_glial_mHTT	12.1656	speed		2	1	siHTT_glial_mHTT	12.1656	speed		5	5	siHTT_glial_mHTT	11.0368	xspeed		2	1	siHTT_glial_mHTT	12.1656	speed
2	2	siHTT_glial_mHTT	13.2191	speed		2	2	siHTT_glial_mHTT	13.2191	speed		5	6	siHTT_glial_mHTT	10.4299	xspeed		2	2	siHTT_glial_mHTT	13.2191	speed
3	1	siHTT_glial_mHTT	13.6606	speed		3	1	siHTT_glial_mHTT	13.6606	speed		5	7	siHTT_glial_mHTT	10.1778	xspeed		3	1	siHTT_glial_mHTT	13.6606	speed
3	2	siHTT_glial_mHTT	11.9763	speed		3	2	siHTT_glial_mHTT	11.9763	speed		5	8	siHTT_glial_mHTT	9.76324	xspeed		3	2	siHTT_glial_mHTT	11.9763	speed
4	1	siHTT_glial_mHTT	13.0399	speed		4	1	siHTT_glial_mHTT	13.0399	speed		5	11	siHTT_glial_mHTT	12.3637	xspeed		4	1	siHTT_glial_mHTT	13.0399	speed
4	2	siHTT_glial_mHTT	10.0979	speed		4	2	siHTT_glial_mHTT	10.0979	speed		5	12	siHTT_glial_mHTT	12.7485	xspeed		4	2	siHTT_glial_mHTT	10.0979	speed
5	1	siHTT_glial_mHTT	13.4475	speed		5	1	siHTT_glial_mHTT	13.4475	speed		6	2	siHTT_glial_mHTT	10.7618	xspeed		5	1	siHTT_glial_mHTT	13.4475	speed
5	2	siHTT_glial_mHTT	11.978	speed		5	2	siHTT_glial_mHTT	11.978	speed		6	3	siHTT_glial_mHTT	11.4804	xspeed		5	2	siHTT_glial_mHTT	11.978	speed
6	1	siHTT_glial_mHTT	13.5401	speed		6	1	siHTT_glial_mHTT	13.5401	speed		6	4	siHTT_glial_mHTT	10.0223	xspeed		6	1	siHTT_glial_mHTT	13.5401	speed
6	2	siHTT_glial_mHTT	11.5133	speed		6	2	siHTT_glial_mHTT	11.5133	speed		6	5	siHTT_glial_mHTT	11.2481	xspeed		6	2	siHTT_glial_mHTT	11.5133	speed
7	1	siHTT_glial_mHTT	12.4868	speed		7	1	siHTT_glial_mHTT	12.4868	speed		6	6	siHTT_glial_mHTT	9.52053	xspeed		7	1	siHTT_glial_mHTT	12.4868	speed
7	2	siHTT_glial_mHTT	12.7704	speed		7	2	siHTT_glial_mHTT	12.7704	speed		6	7	siHTT_glial_mHTT	9.72733	xspeed		7	2	siHTT_glial_mHTT	12.7704	speed
8	1	siHTT_glial_mHTT	11.8278	speed		8	1	siHTT_glial_mHTT	11.8278	speed		6	8	siHTT_glial_mHTT	12.2348	xspeed		8	1	siHTT_glial_mHTT	11.8278	speed
8	2	siHTT_glial_mHTT	13.1025	speed		8	2	siHTT_glial_mHTT	13.1025	speed		6	9	siHTT_glial_mHTT	10.4839	xspeed		8	2	siHTT_glial_mHTT	13.1025	speed
1	2	siHTT_glial_mHTT	10.2567	speed		1	2	siHTT_glial_mHTT	10.2567	speed		6	10	siHTT_glial_mHTT	9.67441	xspeed		1	2	siHTT_glial_mHTT	10.2567	speed
1	3	siHTT_glial_mHTT	9.56936	speed		1	3	siHTT_glial_mHTT	9.56936	speed		6	11	siHTT_glial_mHTT	10.8249	xspeed		1	3	siHTT_glial_mHTT	9.56936	speed
1	4	siHTT_glial_mHTT	11.8178	speed		1	4	siHTT_glial_mHTT	11.8178	speed		6	12	siHTT_glial_mHTT	11.4801	xspeed		1	4	siHTT_glial_mHTT	11.8178	speed
2	2	siHTT_glial_mHTT	12.7563	speed		2	2	siHTT_glial_mHTT	12.7563	speed		7	2	siHTT_glial_mHTT	10.1393	xspeed		2	2	siHTT_glial_mHTT	12.7563	speed
2	3	siHTT_glial_mHTT	13.1716	speed		2	3	siHTT_glial_mHTT	13.1716	speed		7	3	siHTT_glial_mHTT	10.735	xspeed		2	3	siHTT_glial_mHTT	13.1716	speed
2	4	siHTT_glial_mHTT	13.6013	speed		2	4	siHTT_glial_mHTT	13.6013	speed		7	4	siHTT_glial_mHTT	9.28347	xspeed		2	4	siHTT_glial_mHTT	13.6013	speed
3	2	siHTT_glial_mHTT	14.3955	speed		3	2	siHTT_glial_mHTT	14.3955	speed		7	5	siHTT_glial_mHTT	11.421	xspeed		3	2	siHTT_glial_mHTT	14.3955	speed
3	3	siHTT_glial_mHTT	12.5809	speed		3	3	siHTT_glial_mHTT	12.5809	speed		7	6	siHTT_glial_mHTT	10.1057	xspeed		3	3	siHTT_glial_mHTT	12.5809	speed
3	4	siHTT_glial_mHTT	13.2191	speed		3	4	siHTT_glial_mHTT	13.2191	speed		7	7	siHTT_glial_mHTT	9.45811	xspeed		3	4	siHTT_glial_mHTT	13.2191	speed
4	2	siHTT_glial_mHTT	13.2839	speed		4	2	siHTT_glial_mHTT	13.2839	speed		7	8	siHTT_glial_mHTT	9.77235	xspeed		4	2	siHTT_glial_mHTT	13.2839	speed
4	3	siHTT_glial_mHTT	13.8132	speed		4	3	siHTT_glial_mHTT	13.8132	speed		7	9	siHTT_glial_mHTT	8.66277	xspeed		4	3	siHTT_glial_mHTT	13.8132	speed
4	4	siHTT_glial_mHTT	12.4869	speed		4	4	siHTT_glial_mHTT	12.4869	speed		7	10	siHTT_glial_mHTT	10.3265	xspeed		4	4	siHTT_glial_mHTT	12.4869	speed
5	2	siHTT_glial_mHTT	13.31	speed		5	2	siHTT_glial_mHTT	13.31	speed		7	11	siHTT_glial_mHTT	10.1034	xspeed		5	2	siHTT_glial_mHTT	13.31	speed
5	3	siHTT_glial_mHTT	10.8609	speed		5	3	siHTT_glial_mHTT	10.8609	speed		7	12	siHTT_glial_mHTT	9.77142	xspeed		5	3	siHTT_glial_mHTT	10.8609	speed
5	4	siHTT_glial_mHTT	13.15	speed		5	4	siHTT_glial_mHTT	13.15	speed		8	2	siHTT_glial_mHTT	9.15199	xspeed		5	4	siHTT_glial_mHTT	13.15	speed
6	2	siHTT_glial_mHTT	10.7814	speed		6	2	siHTT_glial_mHTT	10.7814	speed		8	3	siHTT_glial_mHTT	10.9883	xspeed		6	2	siHTT_glial_mHTT	10.7814	speed
6	3	siHTT_glial_mHTT	14.081	speed		6	3	siHTT_glial_mHTT	14.081	speed		8	4	siHTT_glial_mHTT	9.01802	xspeed		6	3	siHTT_glial_mHTT	14.081	speed
6	4	siHTT_glial_mHTT	13.5522	speed		6	4	siHTT_glial_mHTT	13.5522	speed		8	5	siHTT_glial_mHTT	11.4003	xspeed		6	4	siHTT_glial_mHTT	13.5522	speed
7	2	siHTT_glial_mHTT	12.7851	speed		7	2	siHTT_glial_mHTT	12.7851	speed		8	6	siHTT_glial_mHTT	10.0882	xspeed		7	2	siHTT_glial_mHTT	12.7851	speed
7	3	siHTT_glial_mHTT	12.3284	speed		7	3	siHTT_glial_mHTT	12.3284	speed		8	7	siHTT_glial_mHTT	9.18188	xspeed		7	3	siHTT_glial_mHTT	12.3284	speed
7	4	siHTT_glial_mHTT	11.6353	speed		7	4	siHTT_glial_mHTT	11.6353	speed		8	8	siHTT_glial_mHTT	10.8001	xspeed		7	4	siHTT_glial_mHTT	11.6353	speed
8	2	siHTT_glial_mHTT	12.551	speed		8	2	siHTT_glial_mHTT	12.551	speed		8	9	siHTT_glial_mHTT	10.775	xspeed		8	2	siHTT_glial_mHTT	12.551	speed
8	3	siHTT_glial_mHTT	12.3522	speed		8	3	siHTT_glial_mHTT	12.3522	speed		8	10	siHTT_glial_mHTT	10.5402	xspeed		8	3	siHTT_glial_mHTT	12.3522	speed
8	4	siHTT_glial_mHTT	11.9198	speed		8	4	siHTT_glial_mHTT	11.9198	speed		8	11	siHTT_glial_mHTT	10.7094	xspeed		8	4	siHTT_glial_mHTT	11.9198	speed
9	2	siHTT_glial_mHTT	12.8324	speed		9	2	siHTT_glial_mHTT	12.8324	speed		8	12	siHTT_glial_mHTT	11.0155	xspeed		9	2	siHTT_glial_mHTT	12.8324	speed
9	3	siHTT_glial_mHTT	12.288	speed		9	3	siHTT_glial_mHTT	12.288	speed		9	2	siHTT_glial_mHTT	9.22669	xspeed		9	3	siHTT_glial_mHTT	12.288	speed
9	4	siHTT_glial_mHTT	11.3166	speed		9	4	siHTT_glial_mHTT	11.3166	speed		9	3	siHTT_glial_mHTT	10.8952	xspeed		9	4	siHTT_glial_mHTT	11.3166	speed
1	5	siHTT_glial_mHTT	11.3322	speed		1	5	siHTT_glial_mHTT	11.3322	speed		9	4	siHTT_glial_mHTT	8.89921	xspeed		1	5	siHTT_glial_mHTT	11.3322	speed
1	6	siHTT_glial_mHTT	11.6054	speed		1	6	siHTT_glial_mHTT	11.6054	speed		10	5	siHTT_glial_mHTT	10.5884	xspeed		1	6	siHTT_glial_mHTT	11.6054	speed
1	7	siHTT_glial_mHTT	10.7686	speed		1	7	siHTT_glial_mHTT	10.7686	speed		10	6	siHTT_glial_mHTT	8.75444	xspeed		1	7	siHTT_glial_mHTT	10.7686	speed
2	5	siHTT_glial_mHTT	11.9043	speed		2	5	siHTT_glial_mHTT	11.9043	speed		10	7	siHTT_glial_mHTT	7.7664	xspeed		2	5	siHTT_glial_mHTT	11.9043	speed
2	6	siHTT_glial_mHTT	11.5123	speed		2	6	siHTT_glial_mHTT	11.5123	speed		10	8	siHTT_glial_mHTT	9.22344	xspeed		2	6	siHTT_glial_mHTT	11.5123	speed
2	7	siHTT_glial_mHTT	5.13955	speed		2	7	siHTT_glial_mHTT	5.13955	speed		10	11	siHTT_glial_mHTT	8.5978	xspeed		2	7	siHTT_glial_mHTT	5.13955	speed
3	5	siHTT_glial_mHTT	14.1215	speed		3	5	siHTT_glial_mHTT	14.1215	speed		10	12	siHTT_glial_mHTT	10.5087	xspeed		3	5	siHTT_glial_mHTT	14.1215	speed
3	6	siHTT_glial_mHTT	14.713	speed		3	6	siHTT_glial_mHTT	14.713	speed		1	1	Non_targeting_hpRNA_glial_mHTT	11.1388	xspeed		3	6	siHTT_glial_mHTT	14.713	speed
3	7	siHTT_glial_mHTT	12.4855	speed		3	7	siHTT_glial_mHTT	12.4855	speed		1	2	Non_targeting_hpRNA_glial_mHTT	11.35	xspeed		3	7	siHTT_glial_mHTT	12.4855	speed
4	5	siHTT_glial_mHTT	13.1075	speed		4	5	siHTT_glial_mHTT	13.1075	speed		1	3	Non_targeting_hpRNA_glial_mHTT	10.8368	xspeed		4	5	siHTT_glial_mHTT	13.1075	speed
4	6	siHTT_glial_mHTT	12.9115	speed		4	6	siHTT_glial_mHTT	12.9115	speed		1	4	Non_targeting_hpRNA_glial_mHTT	9.54902	xspeed		4	6	siHTT_glial_mHTT	12.9115	speed
4	7	siHTT_glial_mHTT	13.2786	speed		4	7	siHTT_glial_mHTT	13.2786	speed		1	5	Non_targeting_hpRNA_glial_mHTT	10.1948	xspeed		4	7	siHTT_glial_mHTT	13.2786	speed
5	5	siHTT_glial_mHTT	12.6432	speed		5	5	siHTT_glial_mHTT	12.6432	speed		1	6	Non_targeting_hpRNA_glial_mHTT	10.3354	xspeed		5	5	siHTT_glial_mHTT	12.6432	speed
5	6	siHTT_glial_mHTT	10.2839	speed		5	6	siHTT_glial_mHTT	10.2839	speed		1	7	Non_targeting_hpRNA_glial_mHTT	10.6336	xspeed		5	6	siHTT_glial_mHTT	10.2839	speed
5	7	siHTT_glial_mHTT	11.408	speed		5	7	siHTT_glial_mHTT	11.408	speed		1	8	Non_targeting_hpRNA_glial_mHTT	10.2781	xspeed		5	7	siHTT_glial_mHTT	11.408	speed
6	5	siHTT_glial_mHTT	13.2561	speed		6	5	siHTT_glial_mHTT	13.2561	speed		1	9	Non_targeting_hpRNA_glial_mHTT	9.08677	xspeed		6	5	siHTT_glial_mHTT	13.2561	speed
6	6	siHTT_glial_mHTT	12.3061	speed		6	6	siHTT_glial_mHTT	12.3061	speed		1	10	Non_targeting_hpRNA_glial_mHTT	10.4671	xspeed		6	6	siHTT_glial_mHTT	12.3061	speed
6	7	siHTT_glial_mHTT	11.9249	speed		6	7	siHTT_glial_mHTT	11.9249	speed		1	11	Non_targeting_hpRNA_glial_mHTT	11.0194	xspeed		6	7	siHTT_glial_mHTT	11.9249	speed
7	5	siHTT_glial_mHTT	12.5336	speed		7	5	siHTT_glial_mHTT	12.5336	speed		2	1	Non_targeting_hpRNA_glial_mHTT	11.9113	xspeed		7	5	siHTT_glial_mHTT	12.5336	speed
7	6	siHTT_glial_mHTT	11.9912	speed		7	6	siHTT_glial_mHTT	11.9912	speed		2	2	Non_targeting_hpRNA_glial_mHTT	9.59059	xspeed		7	6	siHTT_glial_mHTT	11.9912	speed
7	7	siHTT_glial_mHTT	11.0928	speed		7	7	siHTT_glial_mHTT	11.0928	speed		2	3	Non_targeting_hpRNA_glial_mHTT	10.6189	xspeed		7	7	siHTT_glial_mHTT	11.0928	speed
8	5	siHTT_glial_mHTT	12.2642	speed		8	5	siHTT_glial_mHTT	12.2642	speed		2	4	Non_targeting_hpRNA_glial_mHTT	8.79104	xspeed		8	5	siHTT_glial_mHTT	12.2642	speed
8	6	siHTT_glial_mHTT	14.0586	speed		8	6	siHTT_glial_mHTT	14.0586	speed		2	5	Non_targeting_hpRNA_glial_mHTT	9.87594	xspeed		8	6	siHTT_glial_mHTT	14.0586	speed
8	7	siHTT_glial_mHTT	11.0016	speed		8	7	siHTT_glial_mHTT	11.0016	speed		2	6	Non_targeting_hpRNA_glial_mHTT	10.5262	xspeed		8	7	siHTT_glial_mHTT	11.0016	speed
9	5	siHTT_glial_mHTT	9.9565	speed		9	5	siHTT_glial_mHTT	9.9565	speed		2	7	Non_targeting_hpRNA_glial_mHTT	10.2407	xspeed		9	5	siHTT_glial_mHTT	9.9565	speed
9	6	siHTT_glial_mHTT	12.5028	speed		9	6	siHTT_glial_mHTT	12.5028	speed		2	8	Non_targeting_hpRNA_glial_mHTT	10.4693	xspeed		9	6	siHTT_glial_mHTT	12.5028	speed
9	7	siHTT_glial_mHTT	9.82817	speed		9	7	siHTT_glial_mHTT	9.82817	speed		2	9	Non_targeting_hpRNA_glial_mHTT	9.76539	xspeed		9	7	siHTT_glial_mHTT	9.82817	speed
1	1	16592 glial_mHTT	11.3289	speed		1	2	18367 glial_mHTT	12.8482	speed		2	10	Non_targeting_hpRNA_glial_mHTT	9.90889	xspeed		1	1	22539 glial_mHTT	9.90985	speed
1	2	16592 glial_mHTT	12.0971	speed		1	1	18367 glial_mHTT	12.4819	speed		2	11	Non_targeting_hpRNA_glial_mHTT	10.4232	xspeed		1	2	22539 glial_mHTT	11.9627	speed
1	3	16592 glial_mHTT	8.52283	speed		1	3	18367 glial_mHTT	11.9641	speed		3	1	Non_targeting_hpRNA_glial_mHTT	9.34821	xspeed		1	3	22539 glial_mHTT	12.2557	speed
1	4	16592 glial_mHTT	12.0298	speed		1	4	18367 glial_mHTT	10.4967	speed		3	2	Non_targeting_hpRNA_glial_mHTT	8.95114	xspeed		1	4	22539 glial_mHTT	11.1774	speed
1	5	16592 glial_mHTT	10.7512	speed		1	5	18367 glial_mHTT	13.3893	speed		3	3	Non_targeting_hpRNA_glial_mHTT	9.45375	xspeed		1	5	22539 glial_mHTT	10.8855	speed
1	6	16592 glial_mHTT	10.8947	speed		2	2	18367 glial_mHTT	14.995	speed		3	4	Non_targeting_hpRNA_glial_mHTT	7.09065	xspeed		2	1	22539 glial_mHTT	12.7166	speed
2	1	16592 glial_mHTT	13.5316	speed		2	1	18367 glial_mHTT	14.5153	speed		3	5	Non_targeting_hpRNA_glial_mHTT	9.43612	xspeed		2	2	22539 glial_mHTT	11.5219	speed
2	2	16592 glial_mHTT	14.0807	speed		2	3	18367 glial_mHTT	13.6064	speed		3	6	Non_targeting_hpRNA_glial_mHTT	8.79627	xspeed		2	3	22539 glial_mHTT	5.682	speed
2	3	16592 glial_mHTT	12.5506	speed		2	4	18367 glial_mHTT	13.1344	speed		3	7	Non_targeting_hpRNA_glial_mHTT	8.93205	xspeed		2	4	22539 glial_mHTT	6.24284	speed
2	4	16592 glial_mHTT	14.2694	speed		2	5	18367 glial_mHTT	14.6347	speed		3	8	Non_targeting_hpRNA_glial_mHTT	10.2955	xspeed		2	5	22539 glial_mHTT	12.0905	speed
2	5	16592 glial_mHTT	11.9925	speed		3	2	18367 glial_mHTT	14.8875	speed		3	9	Non_targeting_hpRNA_glial_mHTT	9.01618	xspeed		3	1	22539 glial_mHTT	11.9379	speed
2	6	16592 glial_mHTT	12.0807	speed		3	1	18367 glial_mHTT	9.36873	speed		3	10	Non_targeting_hpRNA_glial_mHTT	9.60901	xspeed		3	2	22539 glial_mHTT	6.43776	speed
3	1	16592 glial_mHTT	13.4333	speed		3	3	18367 glial_mHTT	14.3724	speed		3	11	Non_targeting_hpRNA_glial_mHTT	10.2713	xspeed		3	3	22539 glial_mHTT	13.3197	speed
3	2	16592 glial_mHTT	12.3799	speed		3	4	18367 glial_mHTT	12.6406	speed		3	12	Non_targeting_hpRNA_glial_mHTT	9.7931	xspeed		3	4	22539 glial_mHTT	11.9152	speed
3	3	16592 glial_mHTT	11.6415	speed		3	5	18367 glial_mHTT	14.1141	speed		4	1	Non_targeting_hpRNA_glial_mHTT	8.01047	xspeed		3	5	22539 glial_mHTT	12.8113	speed
3	4	16592 glial_mHTT	11.094	speed		4	2	18367 glial_mHTT	15.7411	speed		4	2	Non_targeting_hpRNA_glial_mHTT	7.29751	xspeed		4	1	22539 glial_mHTT	12.1871	speed
3	5	16592 glial_mHTT	11.3152	speed		4	1	18367 glial_mHTT	14.4575	speed		4	3	Non_targeting_hpRNA_glial_mHTT	8.59387	xspeed		4	2	22539 glial_mHTT	12.3433	speed
3	6	16592 glial_mHTT	11.8091	speed		4	3	18367 glial_mHTT	13.1763	speed		4	4	Non_targeting_hpRNA_glial_mHTT	6.75353	xspeed		4	3	22539 glial_mHTT	12.7926	speed
4	1	16592 glial_mHTT	12.5626	speed		4	4	18367 glial_mHTT	13.5077	speed		4	5	Non_targeting_hpRNA_glial_mHTT	9.08419	xspeed		4	4	22539 glial_mHTT	13.2378	speed
4	2	16592 glial_mHTT	13.1119	speed		4	5	18367 glial_mHTT	14.4234	speed		4	6	Non_targeting_hpRNA_glial_mHTT	7.78067	xspeed		4	5	22539 glial_mHTT	11.3588	speed
4	3	16592 glial_mHTT	10.1038	speed		5	2	18367 glial_mHTT	13.6826	speed		4	7	Non_targeting_hpRNA_glial_mHTT	7.75665	xspeed		5	1	22539 glial_mHTT	11.0456	speed
4	4	16592 glial_mHTT	13.9068	speed		5	1	18367 glial_mHTT	12.1899	speed		4	8	Non_targeting_hpRNA_glial_mHTT	8.27501	xspeed		5	2	22539 glial_mHTT	11.6951	speed
4	5	16592 glial_mHTT	12.0664	speed		5	3	18367 glial_mHTT	12.7456	speed		4	9	Non_targeting_hpRNA_glial_mHTT	8.61506	xspeed		5	3	22539 glial_mHTT	13.2191	speed
4	6	16592 glial_mHTT	10.0392	speed		5	4	18367 glial_mHTT	12.8889	speed		4	10	Non_targeting_hpRNA_glial_mHTT	7.78935	xspeed		5	4	22539 glial_mHTT	11.8505	speed
5	1	16592 glial_mHTT	10.3242	speed		5	5	18367 glial_mHTT	13.4376	speed		4	11	Non_targeting_hpRNA_glial_mHTT	9.06595	xspeed		5	5	22539 glial_mHTT	10.8841	speed
5	2	16592 glial_mHTT	10.8402	speed		6	2	18367 glial_mHTT	12.1797	speed		4	12	Non_targeting_hpRNA_glial_mHTT	5.90489	xspeed		6	1	22539 glial_mHTT	11.9385	speed
5	3	16592 glial_mHTT	10.7843	speed		6	1	18367 glial_mHTT	12.5125	speed		5	1	Non_targeting_hpRNA_glial_mHTT	10.0285	xspeed		6	2	22539 glial_mHTT	12.1206	speed
5	4	16592 glial_mHTT	13.7706	speed		6	3	18367 glial_mHTT	12.913	speed		5	2	Non_targeting_hpRNA_glial_mHTT	6.17915	xspeed		6	3	22539 glial_mHTT	12.0912	speed
5	5	16592 glial_mHTT	9.50223	speed		6	4	18367 glial_mHTT	11.5305	speed		5	3	Non_targeting_hpRNA_glial_mHTT	8.46917	xspeed		6	4	22539 glial_mHTT	11.1613	speed
5	6	16592 glial_mHTT	10.5342	speed		6	5	18367 glial_mHTT	13.5459	speed		5	4	Non_targeting_hpRNA_glial_mHTT	7.13822	xspeed		6	5	22539 glial_mHTT	11.1389	speed
6	1	16592 glial_mHTT	13.1359	speed		7	2	18367 glial_mHTT	12.7985	speed		5	5	Non_targeting_hpRNA_glial_mHTT	6.99774	xspeed		7	1	22539 glial_mHTT	6.57828	speed
6	2	16592 glial_mHTT	13.5101	speed		7	1	18367 glial_mHTT	11.1913	speed		5	6	Non_targeting_hpRNA_glial_mHTT	7.06551	xspeed		7	2	22539 glial_mHTT	9.4405	speed
6	3	16592 glial_mHTT	10.9359	speed		7	3	18367 glial_mHTT	11.577	speed		5	7	Non_targeting_hpRNA_glial_mHTT	7.33656	xspeed		7	3	22539 glial_mHTT	7.57314	speed
6	4	16592 glial_mHTT	11.7087	speed		7	4	18367 glial_mHTT	11.2903	speed		5	10	Non_targeting_hpRNA_glial_mHTT	4.44824	xspeed		7	4	22539 glial_mHTT	10.2268	speed
6	5	16592 glial_mHTT	13.1308	speed		7	5	18367 glial_mHTT	10.7396	speed		5	11	Non_targeting_hpRNA_glial_mHTT	8.69927	xspeed		7	5	22539 glial_mHTT	6.45427	speed
6	6	16592 glial_mHTT	10.1527	speed		8	2	18367 glial_mHTT	9.50578	speed		5	12	Non_targeting_hpRNA_glial_mHTT	9.43152	xspeed		8	1	22539 glial_mHTT	8.70606	speed
7	1	16592 glial_mHTT	11.3105	speed		8	1	18367 glial_mHTT	11.7375	speed		6	1	Non_targeting_hpRNA_glial_mHTT	7.43569	xspeed		8	2	22539 glial_mHTT	10.7027	speed
7	2	16592 glial_mHTT	9.7374	speed		8	3	18367 glial_mHTT	11.0842	speed		6	2	Non_targeting_hpRNA_glial_mHTT	5.98597	xspeed		8	3	22539 glial_mHTT	12.4725	speed
7	3	16592 glial_mHTT	9.28468	speed		8	4	18367 glial_mHTT	10.0032	speed		6	3	Non_targeting_hpRNA_glial_mHTT	7.80785	xspeed		8	4	22539 glial_mHTT	11.2321	speed
7	4	16592 glial_mHTT	8.06265	speed		8	5	18367 glial_mHTT	8.17376	speed		6	4	Non_targeting_hpRNA_glial_mHTT	5.68422	xspeed		8	5	22539 glial_mHTT	9.3941	speed
7	5	16592 glial_mHTT	11.8091	speed		9	2	18367 glial_mHTT	8.70764	speed		6	5	Non_targeting_hpRNA_glial_mHTT	5.201	xspeed		9	1	22539 glial_mHTT	4.71441	speed
7	6	16592 glial_mHTT	7.96135	speed		9	1	18367 glial_mHTT	8.016	speed		6	6	Non_targeting_hpRNA_glial_mHTT	6.62084	xspeed		9	2	22539 glial_mHTT	10.8601	speed
8	1	16592 glial_mHTT	10.3499	speed		9	3	18367 glial_mHTT	7.86107	speed		6	7	Non_targeting_hpRNA_glial_mHTT	6.46843	xspeed		9	3	22539 glial_mHTT	7.0033	speed
8	2	16592 glial_mHTT	8.79694	speed		9	4	18367 glial_mHTT	6.79253	speed		6	8	Non_targeting_hpRNA_glial_mHTT	8.28769	xspeed		9	4	22539 glial_mHTT	9.49402	speed
8	3	16592 glial_mHTT	9.05428	speed		9	5	18367 glial_mHTT	10.5898	speed		6	9	Non_targeting_hpRNA_glial_mHTT	6.49692	xspeed		9	5	22539 glial_mHTT	8.65467	speed
8	4	16592 glial_mHTT	8.10256	speed								6	10	Non_targeting_hpRNA_glial_mHTT	5.0706	xspeed
8	5	16592 glial_mHTT	9.22619	speed								6	11	Non_targeting_hpRNA_glial_mHTT	7.56817	xspeed
8	6	16592 glial_mHTT	8.53986	speed								6	12	Non_targeting_hpRNA_glial_mHTT	6.89764	xspeed
9	1	16592 glial_mHTT	8.27814	speed								7	1	Non_targeting_hpRNA_glial_mHTT	4.46321	xspeed
9	2	16592 glial_mHTT	6.23219	speed								7	2	Non_targeting_hpRNA_glial_mHTT	5.12934	xspeed
9	3	16592 glial_mHTT	7.70963	speed								7	3	Non_targeting_hpRNA_glial_mHTT	6.69819	xspeed
9	4	16592 glial_mHTT	7.02902	speed								7	4	Non_targeting_hpRNA_glial_mHTT	4.54252	xspeed
9	5	16592 glial_mHTT	3.31938	speed								7	5	Non_targeting_hpRNA_glial_mHTT	7.64138	xspeed
9	6	16592 glial_mHTT	6.7922	speed								7	6	Non_targeting_hpRNA_glial_mHTT	6.10159	xspeed
												7	7	Non_targeting_hpRNA_glial_mHTT	4.66525	xspeed
												7	8	Non_targeting_hpRNA_glial_mHTT	3.45118	xspeed
												7	9	Non_targeting_hpRNA_glial_mHTT	3.07953	xspeed
												7	10	Non_targeting_hpRNA_glial_mHTT	5.46387	xspeed
												7	11	Non_targeting_hpRNA_glial_mHTT	6.54031	xspeed
												7	12	Non_targeting_hpRNA_glial_mHTT	5.74771	xspeed
												8	1	Non_targeting_hpRNA_glial_mHTT	4.79125	xspeed
												8	2	Non_targeting_hpRNA_glial_mHTT	2.83619	xspeed
												8	3	Non_targeting_hpRNA_glial_mHTT	5.14808	xspeed
												8	4	Non_targeting_hpRNA_glial_mHTT	4.70731	xspeed
												8	5	Non_targeting_hpRNA_glial_mHTT	5.8582	xspeed
												8	6	Non_targeting_hpRNA_glial_mHTT	4.52853	xspeed
												8	7	Non_targeting_hpRNA_glial_mHTT	4.86125	xspeed
												8	8	Non_targeting_hpRNA_glial_mHTT	3.83064	xspeed
												8	9	Non_targeting_hpRNA_glial_mHTT	3.82939	xspeed
												8	10	Non_targeting_hpRNA_glial_mHTT	3.70994	xspeed
												8	11	Non_targeting_hpRNA_glial_mHTT	5.58261	xspeed
												8	12	Non_targeting_hpRNA_glial_mHTT	4.39902	xspeed
												9	1	Non_targeting_hpRNA_glial_mHTT	3.15841	xspeed
												9	2	Non_targeting_hpRNA_glial_mHTT	2.16187	xspeed
												9	3	Non_targeting_hpRNA_glial_mHTT	5.08652	xspeed
												9	4	Non_targeting_hpRNA_glial_mHTT	4.46163	xspeed
												10	5	Non_targeting_hpRNA_glial_mHTT	1.25475	xspeed
												10	6	Non_targeting_hpRNA_glial_mHTT	2.52399	xspeed
												10	7	Non_targeting_hpRNA_glial_mHTT	4.08072	xspeed
												10	8	Non_targeting_hpRNA_glial_mHTT	2.86925	xspeed
												10	9	Non_targeting_hpRNA_glial_mHTT	3.90979	xspeed
												10	12	Non_targeting_hpRNA_glial_mHTT	3.14536	xspeed
												1	1	siHTT_glial_mHTT	11.6776	speed
												2	1	siHTT_glial_mHTT	12.0328	speed
												3	1	siHTT_glial_mHTT	11.3722	speed
												4	1	siHTT_glial_mHTT	11.8439	speed
												5	1	siHTT_glial_mHTT	8.98182	speed
												6	1	siHTT_glial_mHTT	10.4872	speed
												7	1	siHTT_glial_mHTT	11.0565	speed
												8	1	siHTT_glial_mHTT	9.43098	speed
												9	1	siHTT_glial_mHTT	10.2866	speed
												1	2	siHTT_glial_mHTT	11.1304	speed
												1	3	siHTT_glial_mHTT	11.7432	speed
												1	4	siHTT_glial_mHTT	12.178	speed
												1	5	siHTT_glial_mHTT	12.2026	speed
												1	6	siHTT_glial_mHTT	10.5363	speed
												1	7	siHTT_glial_mHTT	11.2252	speed
												1	8	siHTT_glial_mHTT	9.85915	speed
												1	9	siHTT_glial_mHTT	10.2241	speed
												1	10	siHTT_glial_mHTT	11.864	speed
												1	11	siHTT_glial_mHTT	12.2195	speed
												2	2	siHTT_glial_mHTT	12.1171	speed
												2	3	siHTT_glial_mHTT	13.7433	speed
												2	4	siHTT_glial_mHTT	11.6015	speed
												2	5	siHTT_glial_mHTT	13.3805	speed
												2	6	siHTT_glial_mHTT	11.7028	speed
												2	7	siHTT_glial_mHTT	12.5929	speed
												2	8	siHTT_glial_mHTT	12.7692	speed
												2	9	siHTT_glial_mHTT	11.7835	speed
												2	10	siHTT_glial_mHTT	13.1984	speed
												2	11	siHTT_glial_mHTT	12.3759	speed
												3	2	siHTT_glial_mHTT	11.4314	speed
												3	3	siHTT_glial_mHTT	12.8252	speed
												3	4	siHTT_glial_mHTT	11.1103	speed
												3	5	siHTT_glial_mHTT	13.9536	speed
												3	6	siHTT_glial_mHTT	12.2395	speed
												3	7	siHTT_glial_mHTT	11.9881	speed
												3	8	siHTT_glial_mHTT	12.4933	speed
												3	9	siHTT_glial_mHTT	12.0104	speed
												3	10	siHTT_glial_mHTT	12.5815	speed
												3	11	siHTT_glial_mHTT	13.2395	speed
												3	12	siHTT_glial_mHTT	12.7287	speed
												4	2	siHTT_glial_mHTT	12.3754	speed
												4	3	siHTT_glial_mHTT	13.2131	speed
												4	4	siHTT_glial_mHTT	11.0852	speed
												4	5	siHTT_glial_mHTT	6.14971	speed
												4	6	siHTT_glial_mHTT	12.4154	speed
												4	7	siHTT_glial_mHTT	11.4226	speed
												4	8	siHTT_glial_mHTT	12.7347	speed
												4	9	siHTT_glial_mHTT	11.9037	speed
												4	10	siHTT_glial_mHTT	11.0361	speed
												4	11	siHTT_glial_mHTT	7.16206	speed
												4	12	siHTT_glial_mHTT	12.3715	speed
												5	2	siHTT_glial_mHTT	10.2003	speed
												5	3	siHTT_glial_mHTT	13.3692	speed
												5	4	siHTT_glial_mHTT	11.0697	speed
												5	5	siHTT_glial_mHTT	12.2186	speed
												5	6	siHTT_glial_mHTT	11.1897	speed
												5	7	siHTT_glial_mHTT	10.975	speed
												5	8	siHTT_glial_mHTT	10.364	speed
												5	11	siHTT_glial_mHTT	13.3944	speed
												5	12	siHTT_glial_mHTT	13.7832	speed
												6	2	siHTT_glial_mHTT	11.4127	speed
												6	3	siHTT_glial_mHTT	12.2705	speed
												6	4	siHTT_glial_mHTT	10.7582	speed
												6	5	siHTT_glial_mHTT	12.2527	speed
												6	6	siHTT_glial_mHTT	10.2628	speed
												6	7	siHTT_glial_mHTT	10.5368	speed
												6	8	siHTT_glial_mHTT	13.2073	speed
												6	9	siHTT_glial_mHTT	11.307	speed
												6	10	siHTT_glial_mHTT	10.3073	speed
												6	11	siHTT_glial_mHTT	11.7229	speed
												6	12	siHTT_glial_mHTT	12.2721	speed
												7	2	siHTT_glial_mHTT	10.7417	speed
												7	3	siHTT_glial_mHTT	11.3534	speed
												7	4	siHTT_glial_mHTT	9.91126	speed
												7	5	siHTT_glial_mHTT	12.2932	speed
												7	6	siHTT_glial_mHTT	10.9339	speed
												7	7	siHTT_glial_mHTT	10.182	speed
												7	8	siHTT_glial_mHTT	10.3641	speed
												7	9	siHTT_glial_mHTT	9.36013	speed
												7	10	siHTT_glial_mHTT	10.9701	speed
												7	11	siHTT_glial_mHTT	10.8141	speed
												7	12	siHTT_glial_mHTT	10.4026	speed
												8	2	siHTT_glial_mHTT	9.61868	speed
												8	3	siHTT_glial_mHTT	11.56	speed
												8	4	siHTT_glial_mHTT	9.62314	speed
												8	5	siHTT_glial_mHTT	12.1422	speed
												8	6	siHTT_glial_mHTT	10.8608	speed
												8	7	siHTT_glial_mHTT	9.99514	speed
												8	8	siHTT_glial_mHTT	11.568	speed
												8	9	siHTT_glial_mHTT	11.6967	speed
												8	10	siHTT_glial_mHTT	11.193	speed
												8	11	siHTT_glial_mHTT	11.4786	speed
												8	12	siHTT_glial_mHTT	11.8078	speed
												9	2	siHTT_glial_mHTT	9.83765	speed
												9	3	siHTT_glial_mHTT	11.8075	speed
												9	4	siHTT_glial_mHTT	9.6659	speed
												10	5	siHTT_glial_mHTT	11.2256	speed
												10	6	siHTT_glial_mHTT	9.5912	speed
												10	7	siHTT_glial_mHTT	8.36443	speed
												10	8	siHTT_glial_mHTT	9.80208	speed
												10	11	siHTT_glial_mHTT	9.17704	speed
												10	12	siHTT_glial_mHTT	11.2724	speed
												1	1	Non_targeting_hpRNA_glial_mHTT	12.2947	speed
												1	2	Non_targeting_hpRNA_glial_mHTT	12.539	speed
												1	3	Non_targeting_hpRNA_glial_mHTT	11.7268	speed
												1	4	Non_targeting_hpRNA_glial_mHTT	10.6945	speed
												1	5	Non_targeting_hpRNA_glial_mHTT	11.3713	speed
												1	6	Non_targeting_hpRNA_glial_mHTT	11.5927	speed
												1	7	Non_targeting_hpRNA_glial_mHTT	11.6006	speed
												1	8	Non_targeting_hpRNA_glial_mHTT	11.0395	speed
												1	9	Non_targeting_hpRNA_glial_mHTT	9.84753	speed
												1	10	Non_targeting_hpRNA_glial_mHTT	11.0663	speed
												1	11	Non_targeting_hpRNA_glial_mHTT	12.065	speed
												2	1	Non_targeting_hpRNA_glial_mHTT	12.8505	speed
												2	2	Non_targeting_hpRNA_glial_mHTT	10.4477	speed
												2	3	Non_targeting_hpRNA_glial_mHTT	11.2983	speed
												2	4	Non_targeting_hpRNA_glial_mHTT	9.70169	speed
												2	5	Non_targeting_hpRNA_glial_mHTT	10.9079	speed
												2	6	Non_targeting_hpRNA_glial_mHTT	11.4371	speed
												2	7	Non_targeting_hpRNA_glial_mHTT	11.0233	speed
												2	8	Non_targeting_hpRNA_glial_mHTT	11.48	speed
												2	9	Non_targeting_hpRNA_glial_mHTT	10.5753	speed
												2	10	Non_targeting_hpRNA_glial_mHTT	10.6327	speed
												2	11	Non_targeting_hpRNA_glial_mHTT	11.1785	speed
												3	1	Non_targeting_hpRNA_glial_mHTT	10.1471	speed
												3	2	Non_targeting_hpRNA_glial_mHTT	9.57934	speed
												3	3	Non_targeting_hpRNA_glial_mHTT	10.3119	speed
												3	4	Non_targeting_hpRNA_glial_mHTT	7.83033	speed
												3	5	Non_targeting_hpRNA_glial_mHTT	10.3054	speed
												3	6	Non_targeting_hpRNA_glial_mHTT	9.45921	speed
												3	7	Non_targeting_hpRNA_glial_mHTT	9.7389	speed
												3	8	Non_targeting_hpRNA_glial_mHTT	10.9143	speed
												3	9	Non_targeting_hpRNA_glial_mHTT	9.63692	speed
												3	10	Non_targeting_hpRNA_glial_mHTT	10.2763	speed
												3	11	Non_targeting_hpRNA_glial_mHTT	11.1384	speed
												3	12	Non_targeting_hpRNA_glial_mHTT	10.5967	speed
												4	1	Non_targeting_hpRNA_glial_mHTT	8.7975	speed
												4	2	Non_targeting_hpRNA_glial_mHTT	7.88503	speed
												4	3	Non_targeting_hpRNA_glial_mHTT	9.14295	speed
												4	4	Non_targeting_hpRNA_glial_mHTT	7.53403	speed
												4	5	Non_targeting_hpRNA_glial_mHTT	9.77786	speed
												4	6	Non_targeting_hpRNA_glial_mHTT	8.46567	speed
												4	7	Non_targeting_hpRNA_glial_mHTT	8.59036	speed
												4	8	Non_targeting_hpRNA_glial_mHTT	8.81224	speed
												4	9	Non_targeting_hpRNA_glial_mHTT	9.16995	speed
												4	10	Non_targeting_hpRNA_glial_mHTT	8.55572	speed
												4	11	Non_targeting_hpRNA_glial_mHTT	9.70856	speed
												4	12	Non_targeting_hpRNA_glial_mHTT	6.41592	speed
												5	1	Non_targeting_hpRNA_glial_mHTT	10.7769	speed
												5	2	Non_targeting_hpRNA_glial_mHTT	6.68884	speed
												5	3	Non_targeting_hpRNA_glial_mHTT	9.04822	speed
												5	4	Non_targeting_hpRNA_glial_mHTT	7.73946	speed
												5	5	Non_targeting_hpRNA_glial_mHTT	7.68996	speed
												5	6	Non_targeting_hpRNA_glial_mHTT	7.4998	speed
												5	7	Non_targeting_hpRNA_glial_mHTT	7.8901	speed
												5	10	Non_targeting_hpRNA_glial_mHTT	5.2858	speed
												5	11	Non_targeting_hpRNA_glial_mHTT	9.40396	speed
												5	12	Non_targeting_hpRNA_glial_mHTT	10.1336	speed
												6	1	Non_targeting_hpRNA_glial_mHTT	7.9839	speed
												6	2	Non_targeting_hpRNA_glial_mHTT	6.53294	speed
												6	3	Non_targeting_hpRNA_glial_mHTT	8.33055	speed
												6	4	Non_targeting_hpRNA_glial_mHTT	6.36594	speed
												6	5	Non_targeting_hpRNA_glial_mHTT	5.71189	speed
												6	6	Non_targeting_hpRNA_glial_mHTT	7.22377	speed
												6	7	Non_targeting_hpRNA_glial_mHTT	6.99758	speed
												6	8	Non_targeting_hpRNA_glial_mHTT	8.76409	speed
												6	9	Non_targeting_hpRNA_glial_mHTT	7.15761	speed
												6	10	Non_targeting_hpRNA_glial_mHTT	5.57106	speed
												6	11	Non_targeting_hpRNA_glial_mHTT	8.34557	speed
												6	12	Non_targeting_hpRNA_glial_mHTT	7.48858	speed
												7	1	Non_targeting_hpRNA_glial_mHTT	5.15296	speed
												7	2	Non_targeting_hpRNA_glial_mHTT	5.49355	speed
												7	3	Non_targeting_hpRNA_glial_mHTT	7.10943	speed
												7	4	Non_targeting_hpRNA_glial_mHTT	5.08651	speed
												7	5	Non_targeting_hpRNA_glial_mHTT	8.03852	speed
												7	6	Non_targeting_hpRNA_glial_mHTT	6.71318	speed
												7	7	Non_targeting_hpRNA_glial_mHTT	5.39868	speed
												7	8	Non_targeting_hpRNA_glial_mHTT	4.13079	speed
												7	9	Non_targeting_hpRNA_glial_mHTT	3.83695	speed
												7	10	Non_targeting_hpRNA_glial_mHTT	6.06921	speed
												7	11	Non_targeting_hpRNA_glial_mHTT	7.01544	speed
												7	12	Non_targeting_hpRNA_glial_mHTT	6.54443	speed
												8	1	Non_targeting_hpRNA_glial_mHTT	5.22323	speed
												8	2	Non_targeting_hpRNA_glial_mHTT	3.29092	speed
												8	3	Non_targeting_hpRNA_glial_mHTT	5.70368	speed
												8	4	Non_targeting_hpRNA_glial_mHTT	5.34644	speed
												8	5	Non_targeting_hpRNA_glial_mHTT	6.39656	speed
												8	6	Non_targeting_hpRNA_glial_mHTT	5.25645	speed
												8	7	Non_targeting_hpRNA_glial_mHTT	5.47871	speed
												8	8	Non_targeting_hpRNA_glial_mHTT	4.48981	speed
												8	9	Non_targeting_hpRNA_glial_mHTT	4.60025	speed
												8	10	Non_targeting_hpRNA_glial_mHTT	4.43493	speed
												8	11	Non_targeting_hpRNA_glial_mHTT	6.15956	speed
												8	12	Non_targeting_hpRNA_glial_mHTT	5.21209	speed
												9	1	Non_targeting_hpRNA_glial_mHTT	3.84217	speed
												9	2	Non_targeting_hpRNA_glial_mHTT	3.05963	speed
												9	3	Non_targeting_hpRNA_glial_mHTT	5.53149	speed
												9	4	Non_targeting_hpRNA_glial_mHTT	5.33735	speed
												10	5	Non_targeting_hpRNA_glial_mHTT	2.05354	speed
												10	6	Non_targeting_hpRNA_glial_mHTT	3.24662	speed
												10	7	Non_targeting_hpRNA_glial_mHTT	4.79695	speed
												10	8	Non_targeting_hpRNA_glial_mHTT	3.17863	speed
												10	9	Non_targeting_hpRNA_glial_mHTT	4.60528	speed
												10	12	Non_targeting_hpRNA_glial_mHTT	3.62806	speed
												1	1	siHTT_glial_mHTT	15.4378	turning
												2	1	siHTT_glial_mHTT	15.2853	turning
												3	1	siHTT_glial_mHTT	15.9985	turning
												4	1	siHTT_glial_mHTT	14.61	turning
												5	1	siHTT_glial_mHTT	18.5335	turning
												6	1	siHTT_glial_mHTT	15.8412	turning
												7	1	siHTT_glial_mHTT	15.1597	turning
												8	1	siHTT_glial_mHTT	15.7191	turning
												9	1	siHTT_glial_mHTT	16.8674	turning
												1	2	siHTT_glial_mHTT	16.9692	turning
												1	3	siHTT_glial_mHTT	16.7668	turning
												1	4	siHTT_glial_mHTT	13.9396	turning
												1	5	siHTT_glial_mHTT	15.6495	turning
												1	6	siHTT_glial_mHTT	16.2113	turning
												1	7	siHTT_glial_mHTT	15.4591	turning
												1	8	siHTT_glial_mHTT	16.018	turning
												1	9	siHTT_glial_mHTT	13.7007	turning
												1	10	siHTT_glial_mHTT	13.8555	turning
												1	11	siHTT_glial_mHTT	13.9424	turning
												2	2	siHTT_glial_mHTT	14.777	turning
												2	3	siHTT_glial_mHTT	13.7015	turning
												2	4	siHTT_glial_mHTT	14.6788	turning
												2	5	siHTT_glial_mHTT	16.0662	turning
												2	6	siHTT_glial_mHTT	15.8331	turning
												2	7	siHTT_glial_mHTT	15.4473	turning
												2	8	siHTT_glial_mHTT	13.3143	turning
												2	9	siHTT_glial_mHTT	16.5599	turning
												2	10	siHTT_glial_mHTT	13.6051	turning
												2	11	siHTT_glial_mHTT	15.3426	turning
												3	2	siHTT_glial_mHTT	13.8731	turning
												3	3	siHTT_glial_mHTT	14.1174	turning
												3	4	siHTT_glial_mHTT	13.4836	turning
												3	5	siHTT_glial_mHTT	15.7311	turning
												3	6	siHTT_glial_mHTT	15.8792	turning
												3	7	siHTT_glial_mHTT	16.2921	turning
												3	8	siHTT_glial_mHTT	13.9896	turning
												3	9	siHTT_glial_mHTT	15.2484	turning
												3	10	siHTT_glial_mHTT	13.4887	turning
												3	11	siHTT_glial_mHTT	14.5869	turning
												3	12	siHTT_glial_mHTT	14.8158	turning
												4	2	siHTT_glial_mHTT	13.0875	turning
												4	3	siHTT_glial_mHTT	14.6869	turning
												4	4	siHTT_glial_mHTT	14.7027	turning
												4	5	siHTT_glial_mHTT	30.7934	turning
												4	6	siHTT_glial_mHTT	15.8662	turning
												4	7	siHTT_glial_mHTT	16.1075	turning
												4	8	siHTT_glial_mHTT	14.7158	turning
												4	9	siHTT_glial_mHTT	14.5621	turning
												4	10	siHTT_glial_mHTT	16.3612	turning
												4	11	siHTT_glial_mHTT	26.4388	turning
												4	12	siHTT_glial_mHTT	13.9685	turning
												5	2	siHTT_glial_mHTT	15.2976	turning
												5	3	siHTT_glial_mHTT	14.5055	turning
												5	4	siHTT_glial_mHTT	14.2387	turning
												5	5	siHTT_glial_mHTT	16.0413	turning
												5	6	siHTT_glial_mHTT	15.2559	turning
												5	7	siHTT_glial_mHTT	15.3185	turning
												5	8	siHTT_glial_mHTT	13.9849	turning
												5	11	siHTT_glial_mHTT	14.2516	turning
												5	12	siHTT_glial_mHTT	15.1709	turning
												6	2	siHTT_glial_mHTT	14.1616	turning
												6	3	siHTT_glial_mHTT	15.6231	turning
												6	4	siHTT_glial_mHTT	15.1619	turning
												6	5	siHTT_glial_mHTT	14.5412	turning
												6	6	siHTT_glial_mHTT	16.1529	turning
												6	7	siHTT_glial_mHTT	14.0622	turning
												6	8	siHTT_glial_mHTT	13.9425	turning
												6	9	siHTT_glial_mHTT	16.3749	turning
												6	10	siHTT_glial_mHTT	14.8893	turning
												6	11	siHTT_glial_mHTT	16.3434	turning
												6	12	siHTT_glial_mHTT	12.9439	turning
												7	2	siHTT_glial_mHTT	14.029	turning
												7	3	siHTT_glial_mHTT	14.3055	turning
												7	4	siHTT_glial_mHTT	16.6717	turning
												7	5	siHTT_glial_mHTT	14.9039	turning
												7	6	siHTT_glial_mHTT	15.3831	turning
												7	7	siHTT_glial_mHTT	15.5521	turning
												7	8	siHTT_glial_mHTT	15.8831	turning
												7	9	siHTT_glial_mHTT	16.1885	turning
												7	10	siHTT_glial_mHTT	15.102	turning
												7	11	siHTT_glial_mHTT	16.02	turning
												7	12	siHTT_glial_mHTT	14.8357	turning
												8	2	siHTT_glial_mHTT	14.0583	turning
												8	3	siHTT_glial_mHTT	13.3502	turning
												8	4	siHTT_glial_mHTT	16.0943	turning
												8	5	siHTT_glial_mHTT	14.6597	turning
												8	6	siHTT_glial_mHTT	15.8232	turning
												8	7	siHTT_glial_mHTT	16.1481	turning
												8	8	siHTT_glial_mHTT	14.0563	turning
												8	9	siHTT_glial_mHTT	15.2068	turning
												8	10	siHTT_glial_mHTT	13.5127	turning
												8	11	siHTT_glial_mHTT	15.8236	turning
												8	12	siHTT_glial_mHTT	14.1601	turning
												9	2	siHTT_glial_mHTT	15.2997	turning
												9	3	siHTT_glial_mHTT	14.8766	turning
												9	4	siHTT_glial_mHTT	15.7968	turning
												10	5	siHTT_glial_mHTT	15.4028	turning
												10	6	siHTT_glial_mHTT	17.8717	turning
												10	7	siHTT_glial_mHTT	18.231	turning
												10	8	siHTT_glial_mHTT	15.7016	turning
												10	11	siHTT_glial_mHTT	16.1759	turning
												10	12	siHTT_glial_mHTT	15.423	turning
												1	1	Non_targeting_hpRNA_glial_mHTT	16.2088	turning
												1	2	Non_targeting_hpRNA_glial_mHTT	14.092	turning
												1	3	Non_targeting_hpRNA_glial_mHTT	14.5689	turning
												1	4	Non_targeting_hpRNA_glial_mHTT	16.1068	turning
												1	5	Non_targeting_hpRNA_glial_mHTT	15.147	turning
												1	6	Non_targeting_hpRNA_glial_mHTT	14.9354	turning
												1	7	Non_targeting_hpRNA_glial_mHTT	13.4788	turning
												1	8	Non_targeting_hpRNA_glial_mHTT	13.0623	turning
												1	9	Non_targeting_hpRNA_glial_mHTT	16.3104	turning
												1	10	Non_targeting_hpRNA_glial_mHTT	13.7859	turning
												1	11	Non_targeting_hpRNA_glial_mHTT	15.261	turning
												2	1	Non_targeting_hpRNA_glial_mHTT	14.5715	turning
												2	2	Non_targeting_hpRNA_glial_mHTT	15.8884	turning
												2	3	Non_targeting_hpRNA_glial_mHTT	15.9754	turning
												2	4	Non_targeting_hpRNA_glial_mHTT	15.8462	turning
												2	5	Non_targeting_hpRNA_glial_mHTT	14.3895	turning
												2	6	Non_targeting_hpRNA_glial_mHTT	15.2843	turning
												2	7	Non_targeting_hpRNA_glial_mHTT	15.0555	turning
												2	8	Non_targeting_hpRNA_glial_mHTT	16.0747	turning
												2	9	Non_targeting_hpRNA_glial_mHTT	15.4482	turning
												2	10	Non_targeting_hpRNA_glial_mHTT	14.612	turning
												2	11	Non_targeting_hpRNA_glial_mHTT	14.7667	turning
												3	1	Non_targeting_hpRNA_glial_mHTT	16.2712	turning
												3	2	Non_targeting_hpRNA_glial_mHTT	14.6101	turning
												3	3	Non_targeting_hpRNA_glial_mHTT	15.0335	turning
												3	4	Non_targeting_hpRNA_glial_mHTT	17.3787	turning
												3	5	Non_targeting_hpRNA_glial_mHTT	17.238	turning
												3	6	Non_targeting_hpRNA_glial_mHTT	17.3672	turning
												3	7	Non_targeting_hpRNA_glial_mHTT	17.2716	turning
												3	8	Non_targeting_hpRNA_glial_mHTT	14.1884	turning
												3	9	Non_targeting_hpRNA_glial_mHTT	14.8173	turning
												3	10	Non_targeting_hpRNA_glial_mHTT	15.3047	turning
												3	11	Non_targeting_hpRNA_glial_mHTT	15.8252	turning
												3	12	Non_targeting_hpRNA_glial_mHTT	15.6687	turning
												4	1	Non_targeting_hpRNA_glial_mHTT	16.8033	turning
												4	2	Non_targeting_hpRNA_glial_mHTT	16.5524	turning
												4	3	Non_targeting_hpRNA_glial_mHTT	17.6162	turning
												4	4	Non_targeting_hpRNA_glial_mHTT	17.5551	turning
												4	5	Non_targeting_hpRNA_glial_mHTT	15.3733	turning
												4	6	Non_targeting_hpRNA_glial_mHTT	17.1316	turning
												4	7	Non_targeting_hpRNA_glial_mHTT	17.1604	turning
												4	8	Non_targeting_hpRNA_glial_mHTT	17.013	turning
												4	9	Non_targeting_hpRNA_glial_mHTT	15.175	turning
												4	10	Non_targeting_hpRNA_glial_mHTT	17.2711	turning
												4	11	Non_targeting_hpRNA_glial_mHTT	16.2622	turning
												4	12	Non_targeting_hpRNA_glial_mHTT	23.0901	turning
												5	1	Non_targeting_hpRNA_glial_mHTT	16.0834	turning
												5	2	Non_targeting_hpRNA_glial_mHTT	17.772	turning
												5	3	Non_targeting_hpRNA_glial_mHTT	14.6424	turning
												5	4	Non_targeting_hpRNA_glial_mHTT	18.1796	turning
												5	5	Non_targeting_hpRNA_glial_mHTT	19.5078	turning
												5	6	Non_targeting_hpRNA_glial_mHTT	17.9899	turning
												5	7	Non_targeting_hpRNA_glial_mHTT	17.9028	turning
												5	10	Non_targeting_hpRNA_glial_mHTT	29.1033	turning
												5	11	Non_targeting_hpRNA_glial_mHTT	15.9385	turning
												5	12	Non_targeting_hpRNA_glial_mHTT	14.845	turning
												6	1	Non_targeting_hpRNA_glial_mHTT	18.3878	turning
												6	2	Non_targeting_hpRNA_glial_mHTT	19.7071	turning
												6	3	Non_targeting_hpRNA_glial_mHTT	17.436	turning
												6	4	Non_targeting_hpRNA_glial_mHTT	21.746	turning
												6	5	Non_targeting_hpRNA_glial_mHTT	21.3161	turning
												6	6	Non_targeting_hpRNA_glial_mHTT	16.5673	turning
												6	7	Non_targeting_hpRNA_glial_mHTT	22.4505	turning
												6	8	Non_targeting_hpRNA_glial_mHTT	15.8118	turning
												6	9	Non_targeting_hpRNA_glial_mHTT	20.1175	turning
												6	10	Non_targeting_hpRNA_glial_mHTT	22.1779	turning
												6	11	Non_targeting_hpRNA_glial_mHTT	18.535	turning
												6	12	Non_targeting_hpRNA_glial_mHTT	19.6717	turning
												7	1	Non_targeting_hpRNA_glial_mHTT	25.4341	turning
												7	2	Non_targeting_hpRNA_glial_mHTT	20.5222	turning
												7	3	Non_targeting_hpRNA_glial_mHTT	19.1204	turning
												7	4	Non_targeting_hpRNA_glial_mHTT	25.5047	turning
												7	5	Non_targeting_hpRNA_glial_mHTT	15.6259	turning
												7	6	Non_targeting_hpRNA_glial_mHTT	19.4524	turning
												7	7	Non_targeting_hpRNA_glial_mHTT	25.3342	turning
												7	8	Non_targeting_hpRNA_glial_mHTT	26.9494	turning
												7	9	Non_targeting_hpRNA_glial_mHTT	30.6172	turning
												7	10	Non_targeting_hpRNA_glial_mHTT	22.6893	turning
												7	11	Non_targeting_hpRNA_glial_mHTT	16.8742	turning
												7	12	Non_targeting_hpRNA_glial_mHTT	22.7598	turning
												8	1	Non_targeting_hpRNA_glial_mHTT	21.6546	turning
												8	2	Non_targeting_hpRNA_glial_mHTT	28.8175	turning
												8	3	Non_targeting_hpRNA_glial_mHTT	21.3995	turning
												8	4	Non_targeting_hpRNA_glial_mHTT	26.3133	turning
												8	5	Non_targeting_hpRNA_glial_mHTT	18.9274	turning
												8	6	Non_targeting_hpRNA_glial_mHTT	27.3528	turning
												8	7	Non_targeting_hpRNA_glial_mHTT	23.2617	turning
												8	8	Non_targeting_hpRNA_glial_mHTT	26.401	turning
												8	9	Non_targeting_hpRNA_glial_mHTT	26.3968	turning
												8	10	Non_targeting_hpRNA_glial_mHTT	29.3566	turning
												8	11	Non_targeting_hpRNA_glial_mHTT	20.4188	turning
												8	12	Non_targeting_hpRNA_glial_mHTT	26.2266	turning
												9	1	Non_targeting_hpRNA_glial_mHTT	27.9778	turning
												9	2	Non_targeting_hpRNA_glial_mHTT	33.9785	turning
												9	3	Non_targeting_hpRNA_glial_mHTT	20.332	turning
												9	4	Non_targeting_hpRNA_glial_mHTT	26.6683	turning
												10	5	Non_targeting_hpRNA_glial_mHTT	37.0609	turning
												10	6	Non_targeting_hpRNA_glial_mHTT	29.173	turning
												10	7	Non_targeting_hpRNA_glial_mHTT	27.0722	turning
												10	8	Non_targeting_hpRNA_glial_mHTT	27.0394	turning
												10	9	Non_targeting_hpRNA_glial_mHTT	24.39	turning
												10	12	Non_targeting_hpRNA_glial_mHTT	27.8656	turning
												1	1	siHTT_glial_mHTT	19.9382	stumbling
												2	1	siHTT_glial_mHTT	16.9023	stumbling
												3	1	siHTT_glial_mHTT	18.028	stumbling
												4	1	siHTT_glial_mHTT	16.3632	stumbling
												5	1	siHTT_glial_mHTT	17.3459	stumbling
												6	1	siHTT_glial_mHTT	16.6519	stumbling
												7	1	siHTT_glial_mHTT	14.9207	stumbling
												8	1	siHTT_glial_mHTT	16.7225	stumbling
												9	1	siHTT_glial_mHTT	16.8903	stumbling
												1	2	siHTT_glial_mHTT	23.8275	stumbling
												1	3	siHTT_glial_mHTT	19.2864	stumbling
												1	4	siHTT_glial_mHTT	18.6453	stumbling
												1	5	siHTT_glial_mHTT	19.6809	stumbling
												1	6	siHTT_glial_mHTT	18.8571	stumbling
												1	7	siHTT_glial_mHTT	19.854	stumbling
												1	8	siHTT_glial_mHTT	18.5673	stumbling
												1	9	siHTT_glial_mHTT	16.4528	stumbling
												1	10	siHTT_glial_mHTT	15.1548	stumbling
												1	11	siHTT_glial_mHTT	15.4396	stumbling
												2	2	siHTT_glial_mHTT	17.7393	stumbling
												2	3	siHTT_glial_mHTT	15.1546	stumbling
												2	4	siHTT_glial_mHTT	18.104	stumbling
												2	5	siHTT_glial_mHTT	19.6931	stumbling
												2	6	siHTT_glial_mHTT	18.1652	stumbling
												2	7	siHTT_glial_mHTT	18.8763	stumbling
												2	8	siHTT_glial_mHTT	15.387	stumbling
												2	9	siHTT_glial_mHTT	18.2647	stumbling
												2	10	siHTT_glial_mHTT	15.2732	stumbling
												2	11	siHTT_glial_mHTT	17.6654	stumbling
												3	2	siHTT_glial_mHTT	14.9852	stumbling
												3	3	siHTT_glial_mHTT	16.6811	stumbling
												3	4	siHTT_glial_mHTT	14.6667	stumbling
												3	5	siHTT_glial_mHTT	18.1945	stumbling
												3	6	siHTT_glial_mHTT	16.4059	stumbling
												3	7	siHTT_glial_mHTT	17.8381	stumbling
												3	8	siHTT_glial_mHTT	14.5513	stumbling
												3	9	siHTT_glial_mHTT	17.2264	stumbling
												3	10	siHTT_glial_mHTT	14.7977	stumbling
												3	11	siHTT_glial_mHTT	16.5011	stumbling
												3	12	siHTT_glial_mHTT	16.0825	stumbling
												4	2	siHTT_glial_mHTT	13.3357	stumbling
												4	3	siHTT_glial_mHTT	15.6786	stumbling
												4	4	siHTT_glial_mHTT	15.8461	stumbling
												4	5	siHTT_glial_mHTT	31.1628	stumbling
												4	6	siHTT_glial_mHTT	15.8971	stumbling
												4	7	siHTT_glial_mHTT	18.3447	stumbling
												4	8	siHTT_glial_mHTT	16.0898	stumbling
												4	9	siHTT_glial_mHTT	15.8268	stumbling
												4	10	siHTT_glial_mHTT	16.5243	stumbling
												4	11	siHTT_glial_mHTT	29.744	stumbling
												4	12	siHTT_glial_mHTT	14.6023	stumbling
												5	2	siHTT_glial_mHTT	16.2067	stumbling
												5	3	siHTT_glial_mHTT	14.7431	stumbling
												5	4	siHTT_glial_mHTT	14.2881	stumbling
												5	5	siHTT_glial_mHTT	17.2121	stumbling
												5	6	siHTT_glial_mHTT	16.4678	stumbling
												5	7	siHTT_glial_mHTT	17.1973	stumbling
												5	8	siHTT_glial_mHTT	14.7145	stumbling
												5	11	siHTT_glial_mHTT	16.0818	stumbling
												5	12	siHTT_glial_mHTT	15.8441	stumbling
												6	2	siHTT_glial_mHTT	15.0864	stumbling
												6	3	siHTT_glial_mHTT	15.4621	stumbling
												6	4	siHTT_glial_mHTT	15.7912	stumbling
												6	5	siHTT_glial_mHTT	16.0089	stumbling
												6	6	siHTT_glial_mHTT	16.936	stumbling
												6	7	siHTT_glial_mHTT	16.9411	stumbling
												6	8	siHTT_glial_mHTT	14.5585	stumbling
												6	9	siHTT_glial_mHTT	16.4617	stumbling
												6	10	siHTT_glial_mHTT	15.1054	stumbling
												6	11	siHTT_glial_mHTT	17.1145	stumbling
												6	12	siHTT_glial_mHTT	14.8024	stumbling
												7	2	siHTT_glial_mHTT	14.114	stumbling
												7	3	siHTT_glial_mHTT	14.4703	stumbling
												7	4	siHTT_glial_mHTT	16.7376	stumbling
												7	5	siHTT_glial_mHTT	15.2919	stumbling
												7	6	siHTT_glial_mHTT	17.4189	stumbling
												7	7	siHTT_glial_mHTT	15.9331	stumbling
												7	8	siHTT_glial_mHTT	15.5044	stumbling
												7	9	siHTT_glial_mHTT	18.274	stumbling
												7	10	siHTT_glial_mHTT	15.0027	stumbling
												7	11	siHTT_glial_mHTT	16.283	stumbling
												7	12	siHTT_glial_mHTT	15.9269	stumbling
												8	2	siHTT_glial_mHTT	14.5969	stumbling
												8	3	siHTT_glial_mHTT	14.4924	stumbling
												8	4	siHTT_glial_mHTT	15.5052	stumbling
												8	5	siHTT_glial_mHTT	15.077	stumbling
												8	6	siHTT_glial_mHTT	15.4622	stumbling
												8	7	siHTT_glial_mHTT	16.5095	stumbling
												8	8	siHTT_glial_mHTT	15.4805	stumbling
												8	9	siHTT_glial_mHTT	17.4974	stumbling
												8	10	siHTT_glial_mHTT	14.3145	stumbling
												8	11	siHTT_glial_mHTT	15.7455	stumbling
												8	12	siHTT_glial_mHTT	16.2159	stumbling
												9	2	siHTT_glial_mHTT	14.806	stumbling
												9	3	siHTT_glial_mHTT	17.4004	stumbling
												9	4	siHTT_glial_mHTT	17.9822	stumbling
												10	5	siHTT_glial_mHTT	14.6761	stumbling
												10	6	siHTT_glial_mHTT	18.0346	stumbling
												10	7	siHTT_glial_mHTT	17.0257	stumbling
												10	8	siHTT_glial_mHTT	15.5176	stumbling
												10	11	siHTT_glial_mHTT	15.9466	stumbling
												10	12	siHTT_glial_mHTT	15.6915	stumbling
												1	1	Non_targeting_hpRNA_glial_mHTT	17.3691	stumbling
												1	2	Non_targeting_hpRNA_glial_mHTT	18.1992	stumbling
												1	3	Non_targeting_hpRNA_glial_mHTT	16.1699	stumbling
												1	4	Non_targeting_hpRNA_glial_mHTT	16.5564	stumbling
												1	5	Non_targeting_hpRNA_glial_mHTT	17.9519	stumbling
												1	6	Non_targeting_hpRNA_glial_mHTT	18.6578	stumbling
												1	7	Non_targeting_hpRNA_glial_mHTT	14.378	stumbling
												1	8	Non_targeting_hpRNA_glial_mHTT	14.6105	stumbling
												1	9	Non_targeting_hpRNA_glial_mHTT	18.1632	stumbling
												1	10	Non_targeting_hpRNA_glial_mHTT	14.5152	stumbling
												1	11	Non_targeting_hpRNA_glial_mHTT	16.6093	stumbling
												2	1	Non_targeting_hpRNA_glial_mHTT	15.7259	stumbling
												2	2	Non_targeting_hpRNA_glial_mHTT	18.0189	stumbling
												2	3	Non_targeting_hpRNA_glial_mHTT	16.0928	stumbling
												2	4	Non_targeting_hpRNA_glial_mHTT	16.6764	stumbling
												2	5	Non_targeting_hpRNA_glial_mHTT	17.3885	stumbling
												2	6	Non_targeting_hpRNA_glial_mHTT	17.6203	stumbling
												2	7	Non_targeting_hpRNA_glial_mHTT	15.9039	stumbling
												2	8	Non_targeting_hpRNA_glial_mHTT	16.4207	stumbling
												2	9	Non_targeting_hpRNA_glial_mHTT	15.7819	stumbling
												2	10	Non_targeting_hpRNA_glial_mHTT	16.0027	stumbling
												2	11	Non_targeting_hpRNA_glial_mHTT	15.4231	stumbling
												3	1	Non_targeting_hpRNA_glial_mHTT	17.3939	stumbling
												3	2	Non_targeting_hpRNA_glial_mHTT	16.9875	stumbling
												3	3	Non_targeting_hpRNA_glial_mHTT	18.3951	stumbling
												3	4	Non_targeting_hpRNA_glial_mHTT	18.278	stumbling
												3	5	Non_targeting_hpRNA_glial_mHTT	19.1194	stumbling
												3	6	Non_targeting_hpRNA_glial_mHTT	18.3402	stumbling
												3	7	Non_targeting_hpRNA_glial_mHTT	17.736	stumbling
												3	8	Non_targeting_hpRNA_glial_mHTT	13.9511	stumbling
												3	9	Non_targeting_hpRNA_glial_mHTT	16.5748	stumbling
												3	10	Non_targeting_hpRNA_glial_mHTT	16.4012	stumbling
												3	11	Non_targeting_hpRNA_glial_mHTT	15.8416	stumbling
												3	12	Non_targeting_hpRNA_glial_mHTT	17.3351	stumbling
												4	1	Non_targeting_hpRNA_glial_mHTT	19.5806	stumbling
												4	2	Non_targeting_hpRNA_glial_mHTT	17.8164	stumbling
												4	3	Non_targeting_hpRNA_glial_mHTT	18.3782	stumbling
												4	4	Non_targeting_hpRNA_glial_mHTT	20.0546	stumbling
												4	5	Non_targeting_hpRNA_glial_mHTT	17.8771	stumbling
												4	6	Non_targeting_hpRNA_glial_mHTT	19.6594	stumbling
												4	7	Non_targeting_hpRNA_glial_mHTT	20.1837	stumbling
												4	8	Non_targeting_hpRNA_glial_mHTT	17.0159	stumbling
												4	9	Non_targeting_hpRNA_glial_mHTT	16.0208	stumbling
												4	10	Non_targeting_hpRNA_glial_mHTT	19.7445	stumbling
												4	11	Non_targeting_hpRNA_glial_mHTT	17.4422	stumbling
												4	12	Non_targeting_hpRNA_glial_mHTT	22.2258	stumbling
												5	1	Non_targeting_hpRNA_glial_mHTT	17.5648	stumbling
												5	2	Non_targeting_hpRNA_glial_mHTT	18.9939	stumbling
												5	3	Non_targeting_hpRNA_glial_mHTT	17.1157	stumbling
												5	4	Non_targeting_hpRNA_glial_mHTT	18.0065	stumbling
												5	5	Non_targeting_hpRNA_glial_mHTT	21.248	stumbling
												5	6	Non_targeting_hpRNA_glial_mHTT	17.5217	stumbling
												5	7	Non_targeting_hpRNA_glial_mHTT	18.6796	stumbling
												5	10	Non_targeting_hpRNA_glial_mHTT	28.988	stumbling
												5	11	Non_targeting_hpRNA_glial_mHTT	18.887	stumbling
												5	12	Non_targeting_hpRNA_glial_mHTT	16.2667	stumbling
												6	1	Non_targeting_hpRNA_glial_mHTT	18.6469	stumbling
												6	2	Non_targeting_hpRNA_glial_mHTT	20.898	stumbling
												6	3	Non_targeting_hpRNA_glial_mHTT	17.7769	stumbling
												6	4	Non_targeting_hpRNA_glial_mHTT	21.9232	stumbling
												6	5	Non_targeting_hpRNA_glial_mHTT	22.8921	stumbling
												6	6	Non_targeting_hpRNA_glial_mHTT	18.8697	stumbling
												6	7	Non_targeting_hpRNA_glial_mHTT	23.484	stumbling
												6	8	Non_targeting_hpRNA_glial_mHTT	16.7493	stumbling
												6	9	Non_targeting_hpRNA_glial_mHTT	22.2823	stumbling
												6	10	Non_targeting_hpRNA_glial_mHTT	21.7825	stumbling
												6	11	Non_targeting_hpRNA_glial_mHTT	19.9581	stumbling
												6	12	Non_targeting_hpRNA_glial_mHTT	20.0391	stumbling
												7	1	Non_targeting_hpRNA_glial_mHTT	26.1984	stumbling
												7	2	Non_targeting_hpRNA_glial_mHTT	20.4263	stumbling
												7	3	Non_targeting_hpRNA_glial_mHTT	18.9309	stumbling
												7	4	Non_targeting_hpRNA_glial_mHTT	24.3606	stumbling
												7	5	Non_targeting_hpRNA_glial_mHTT	15.9056	stumbling
												7	6	Non_targeting_hpRNA_glial_mHTT	23.2092	stumbling
												7	7	Non_targeting_hpRNA_glial_mHTT	26.133	stumbling
												7	8	Non_targeting_hpRNA_glial_mHTT	30.6369	stumbling
												7	9	Non_targeting_hpRNA_glial_mHTT	30.0825	stumbling
												7	10	Non_targeting_hpRNA_glial_mHTT	24.5741	stumbling
												7	11	Non_targeting_hpRNA_glial_mHTT	18.644	stumbling
												7	12	Non_targeting_hpRNA_glial_mHTT	24.0485	stumbling
												8	1	Non_targeting_hpRNA_glial_mHTT	21.3759	stumbling
												8	2	Non_targeting_hpRNA_glial_mHTT	26.2934	stumbling
												8	3	Non_targeting_hpRNA_glial_mHTT	22.1537	stumbling
												8	4	Non_targeting_hpRNA_glial_mHTT	26.5238	stumbling
												8	5	Non_targeting_hpRNA_glial_mHTT	17.7581	stumbling
												8	6	Non_targeting_hpRNA_glial_mHTT	26.9554	stumbling
												8	7	Non_targeting_hpRNA_glial_mHTT	24.6857	stumbling
												8	8	Non_targeting_hpRNA_glial_mHTT	27.8211	stumbling
												8	9	Non_targeting_hpRNA_glial_mHTT	28.9534	stumbling
												8	10	Non_targeting_hpRNA_glial_mHTT	32.5648	stumbling
												8	11	Non_targeting_hpRNA_glial_mHTT	20.5817	stumbling
												8	12	Non_targeting_hpRNA_glial_mHTT	28.3941	stumbling
												9	1	Non_targeting_hpRNA_glial_mHTT	27.1485	stumbling
												9	2	Non_targeting_hpRNA_glial_mHTT	34.1276	stumbling
												9	3	Non_targeting_hpRNA_glial_mHTT	20.5877	stumbling
												9	4	Non_targeting_hpRNA_glial_mHTT	27.7852	stumbling
												10	5	Non_targeting_hpRNA_glial_mHTT	36.8074	stumbling
												10	6	Non_targeting_hpRNA_glial_mHTT	31.7344	stumbling
												10	7	Non_targeting_hpRNA_glial_mHTT	26.899	stumbling
												10	8	Non_targeting_hpRNA_glial_mHTT	24.5121	stumbling
												10	9	Non_targeting_hpRNA_glial_mHTT	30.3277	stumbling
												10	12	Non_targeting_hpRNA_glial_mHTT	27.8344	stumbling
												1	1	v102216_glial_mHTT	11.0901	xspeed
												1	2	v102216_glial_mHTT	11.1677	xspeed
												1	3	v102216_glial_mHTT	10.3973	xspeed
												2	1	v102216_glial_mHTT	11.6955	xspeed
												2	2	v102216_glial_mHTT	11.3611	xspeed
												2	3	v102216_glial_mHTT	11.467	xspeed
												3	1	v102216_glial_mHTT	11.0084	xspeed
												3	2	v102216_glial_mHTT	10.2163	xspeed
												3	3	v102216_glial_mHTT	10.84	xspeed
												4	1	v102216_glial_mHTT	10.1356	xspeed
												4	2	v102216_glial_mHTT	8.73537	xspeed
												4	3	v102216_glial_mHTT	9.08011	xspeed
												5	1	v102216_glial_mHTT	9.63987	xspeed
												5	2	v102216_glial_mHTT	8.2545	xspeed
												5	3	v102216_glial_mHTT	7.43261	xspeed
												6	1	v102216_glial_mHTT	8.13959	xspeed
												6	2	v102216_glial_mHTT	8.20441	xspeed
												6	3	v102216_glial_mHTT	7.40658	xspeed
												7	1	v102216_glial_mHTT	7.81359	xspeed
												7	2	v102216_glial_mHTT	8.38763	xspeed
												7	3	v102216_glial_mHTT	4.33758	xspeed
												8	1	v102216_glial_mHTT	7.17562	xspeed
												8	2	v102216_glial_mHTT	5.11164	xspeed
												8	3	v102216_glial_mHTT	2.15379	xspeed
												10	1	v102216_glial_mHTT	4.58196	xspeed
												10	2	v102216_glial_mHTT	0.591994	xspeed
												10	3	v102216_glial_mHTT	0.889477	xspeed
												1	1	v102216_glial_mHTT	12.1648	speed
												1	2	v102216_glial_mHTT	11.9865	speed
												1	3	v102216_glial_mHTT	11.2963	speed
												2	1	v102216_glial_mHTT	12.6712	speed
												2	2	v102216_glial_mHTT	12.5078	speed
												2	3	v102216_glial_mHTT	12.5209	speed
												3	1	v102216_glial_mHTT	11.9486	speed
												3	2	v102216_glial_mHTT	11.1189	speed
												3	3	v102216_glial_mHTT	11.7669	speed
												4	1	v102216_glial_mHTT	10.8026	speed
												4	2	v102216_glial_mHTT	9.61936	speed
												4	3	v102216_glial_mHTT	9.89658	speed
												5	1	v102216_glial_mHTT	10.3744	speed
												5	2	v102216_glial_mHTT	9.05127	speed
												5	3	v102216_glial_mHTT	7.96207	speed
												6	1	v102216_glial_mHTT	8.68182	speed
												6	2	v102216_glial_mHTT	8.84128	speed
												6	3	v102216_glial_mHTT	8.33729	speed
												7	1	v102216_glial_mHTT	8.34741	speed
												7	2	v102216_glial_mHTT	8.8339	speed
												7	3	v102216_glial_mHTT	5.03848	speed
												8	1	v102216_glial_mHTT	8.02643	speed
												8	2	v102216_glial_mHTT	6.21947	speed
												8	3	v102216_glial_mHTT	2.99533	speed
												10	1	v102216_glial_mHTT	5.30755	speed
												10	2	v102216_glial_mHTT	1.6301	speed
												10	3	v102216_glial_mHTT	1.32236	speed
												1	1	v102216_glial_mHTT	15.9022	turning
												1	2	v102216_glial_mHTT	14.1167	turning
												1	3	v102216_glial_mHTT	15.4994	turning
												2	1	v102216_glial_mHTT	16.0756	turning
												2	2	v102216_glial_mHTT	16.3526	turning
												2	3	v102216_glial_mHTT	15.8168	turning
												3	1	v102216_glial_mHTT	16.0062	turning
												3	2	v102216_glial_mHTT	17.6841	turning
												3	3	v102216_glial_mHTT	15.6389	turning
												4	1	v102216_glial_mHTT	16.3425	turning
												4	2	v102216_glial_mHTT	17.5459	turning
												4	3	v102216_glial_mHTT	17.7509	turning
												5	1	v102216_glial_mHTT	15.6523	turning
												5	2	v102216_glial_mHTT	16.9554	turning
												5	3	v102216_glial_mHTT	18.8397	turning
												6	1	v102216_glial_mHTT	17.6946	turning
												6	2	v102216_glial_mHTT	17.8223	turning
												6	3	v102216_glial_mHTT	16.8448	turning
												7	1	v102216_glial_mHTT	18.1343	turning
												7	2	v102216_glial_mHTT	18.4004	turning
												7	3	v102216_glial_mHTT	21.7902	turning
												8	1	v102216_glial_mHTT	18.5796	turning
												8	2	v102216_glial_mHTT	23.6808	turning
												8	3	v102216_glial_mHTT	31.4154	turning
												10	1	v102216_glial_mHTT	25.5173	turning
												10	2	v102216_glial_mHTT	41.3672	turning
												10	3	v102216_glial_mHTT	42.8894	turning
												1	1	v102216_glial_mHTT	16.4387	stumbling
												1	2	v102216_glial_mHTT	14.6704	stumbling
												1	3	v102216_glial_mHTT	16.6728	stumbling
												2	1	v102216_glial_mHTT	17.7086	stumbling
												2	2	v102216_glial_mHTT	17.6953	stumbling
												2	3	v102216_glial_mHTT	16.1503	stumbling
												3	1	v102216_glial_mHTT	17.8217	stumbling
												3	2	v102216_glial_mHTT	18.5195	stumbling
												3	3	v102216_glial_mHTT	16.4423	stumbling
												4	1	v102216_glial_mHTT	16.7737	stumbling
												4	2	v102216_glial_mHTT	18.7968	stumbling
												4	3	v102216_glial_mHTT	18.8268	stumbling
												5	1	v102216_glial_mHTT	16.0212	stumbling
												5	2	v102216_glial_mHTT	17.36	stumbling
												5	3	v102216_glial_mHTT	20.3257	stumbling
												6	1	v102216_glial_mHTT	16.833	stumbling
												6	2	v102216_glial_mHTT	21.0516	stumbling
												6	3	v102216_glial_mHTT	22.3268	stumbling
												7	1	v102216_glial_mHTT	17.5279	stumbling
												7	2	v102216_glial_mHTT	17.5958	stumbling
												7	3	v102216_glial_mHTT	24.5078	stumbling
												8	1	v102216_glial_mHTT	20.7385	stumbling
												8	2	v102216_glial_mHTT	29.3451	stumbling
												8	3	v102216_glial_mHTT	36.8217	stumbling
												10	1	v102216_glial_mHTT	23.4471	stumbling
												10	2	v102216_glial_mHTT	42.4908	stumbling
												10	3	v102216_glial_mHTT	34.2741	stumbling

## Sheet: NRXN
nrx1 BDSC 21977						nrx1 BDSC 32408						nrx1 BDSC 55467
Trialday	Replicate	Genotype	Observation	Metric		Trialday	Replicate	Genotype	Observation	Metric		Trialday	Replicate	Genotype	Observation	Metric
2	1	Non_targeting_hpRNA_glial_mHTT	14.2278	speed		1	1	Non_targeting_hpRNA_glial_mHTT	12.186	speed		1	1	Non_targeting_hpRNA_glial_mHTT	12.186	speed
2	2	Non_targeting_hpRNA_glial_mHTT	15.5571	speed		1	2	Non_targeting_hpRNA_glial_mHTT	12.7909	speed		1	2	Non_targeting_hpRNA_glial_mHTT	12.7909	speed
2	3	Non_targeting_hpRNA_glial_mHTT	14.5411	speed		2	1	Non_targeting_hpRNA_glial_mHTT	11.6151	speed		2	1	Non_targeting_hpRNA_glial_mHTT	11.6151	speed
3	1	Non_targeting_hpRNA_glial_mHTT	12.1723	speed		2	2	Non_targeting_hpRNA_glial_mHTT	12.1219	speed		2	2	Non_targeting_hpRNA_glial_mHTT	12.1219	speed
3	2	Non_targeting_hpRNA_glial_mHTT	12.2934	speed		3	1	Non_targeting_hpRNA_glial_mHTT	9.94744	speed		3	1	Non_targeting_hpRNA_glial_mHTT	9.94744	speed
3	3	Non_targeting_hpRNA_glial_mHTT	9.53973	speed		3	2	Non_targeting_hpRNA_glial_mHTT	11.7971	speed		3	2	Non_targeting_hpRNA_glial_mHTT	11.7971	speed
4	1	Non_targeting_hpRNA_glial_mHTT	8.78102	speed		4	1	Non_targeting_hpRNA_glial_mHTT	9.85299	speed		4	1	Non_targeting_hpRNA_glial_mHTT	9.85299	speed
4	2	Non_targeting_hpRNA_glial_mHTT	10.7369	speed		4	2	Non_targeting_hpRNA_glial_mHTT	10.6864	speed		4	2	Non_targeting_hpRNA_glial_mHTT	10.6864	speed
4	3	Non_targeting_hpRNA_glial_mHTT	9.95084	speed		5	1	Non_targeting_hpRNA_glial_mHTT	5.32302	speed		5	1	Non_targeting_hpRNA_glial_mHTT	5.32302	speed
5	1	Non_targeting_hpRNA_glial_mHTT	5.73557	speed		5	2	Non_targeting_hpRNA_glial_mHTT	10.4062	speed		5	2	Non_targeting_hpRNA_glial_mHTT	10.4062	speed
5	2	Non_targeting_hpRNA_glial_mHTT	9.92094	speed		6	1	Non_targeting_hpRNA_glial_mHTT	1.35658	speed		6	1	Non_targeting_hpRNA_glial_mHTT	1.35658	speed
5	3	Non_targeting_hpRNA_glial_mHTT	10.0181	speed		6	2	Non_targeting_hpRNA_glial_mHTT	6.91932	speed		6	2	Non_targeting_hpRNA_glial_mHTT	6.91932	speed
6	1	Non_targeting_hpRNA_glial_mHTT	4.91453	speed		7	1	Non_targeting_hpRNA_glial_mHTT	8.64577	speed		7	1	Non_targeting_hpRNA_glial_mHTT	8.64577	speed
6	2	Non_targeting_hpRNA_glial_mHTT	9.42369	speed		7	2	Non_targeting_hpRNA_glial_mHTT	8.6402	speed		7	2	Non_targeting_hpRNA_glial_mHTT	8.6402	speed
6	3	Non_targeting_hpRNA_glial_mHTT	9.29628	speed		8	1	Non_targeting_hpRNA_glial_mHTT	5.00066	speed		8	1	Non_targeting_hpRNA_glial_mHTT	5.00066	speed
7	1	Non_targeting_hpRNA_glial_mHTT	4.65538	speed		8	2	Non_targeting_hpRNA_glial_mHTT	6.39159	speed		8	2	Non_targeting_hpRNA_glial_mHTT	6.39159	speed
7	2	Non_targeting_hpRNA_glial_mHTT	4.87125	speed		1	3	Non_targeting_hpRNA_glial_mHTT	11.5646	speed		1	3	Non_targeting_hpRNA_glial_mHTT	11.5646	speed
7	3	Non_targeting_hpRNA_glial_mHTT	8.14019	speed		1	4	Non_targeting_hpRNA_glial_mHTT	10.6456	speed		1	4	Non_targeting_hpRNA_glial_mHTT	10.6456	speed
8	1	Non_targeting_hpRNA_glial_mHTT	3.44567	speed		1	5	Non_targeting_hpRNA_glial_mHTT	8.89028	speed		1	5	Non_targeting_hpRNA_glial_mHTT	8.89028	speed
8	2	Non_targeting_hpRNA_glial_mHTT	5.02795	speed		2	3	Non_targeting_hpRNA_glial_mHTT	9.55612	speed		2	3	Non_targeting_hpRNA_glial_mHTT	9.55612	speed
8	3	Non_targeting_hpRNA_glial_mHTT	4.10722	speed		2	4	Non_targeting_hpRNA_glial_mHTT	12.9619	speed		2	4	Non_targeting_hpRNA_glial_mHTT	12.9619	speed
9	1	Non_targeting_hpRNA_glial_mHTT	6.6524	speed		2	5	Non_targeting_hpRNA_glial_mHTT	12.984	speed		2	5	Non_targeting_hpRNA_glial_mHTT	12.984	speed
9	2	Non_targeting_hpRNA_glial_mHTT	7.84532	speed		3	3	Non_targeting_hpRNA_glial_mHTT	9.64493	speed		3	3	Non_targeting_hpRNA_glial_mHTT	9.64493	speed
9	3	Non_targeting_hpRNA_glial_mHTT	7.73044	speed		3	4	Non_targeting_hpRNA_glial_mHTT	12.1723	speed		3	4	Non_targeting_hpRNA_glial_mHTT	12.1723	speed
10	1	Non_targeting_hpRNA_glial_mHTT	3.7822	speed		3	5	Non_targeting_hpRNA_glial_mHTT	10.8503	speed		3	5	Non_targeting_hpRNA_glial_mHTT	10.8503	speed
10	2	Non_targeting_hpRNA_glial_mHTT	3.05975	speed		4	3	Non_targeting_hpRNA_glial_mHTT	7.78815	speed		4	3	Non_targeting_hpRNA_glial_mHTT	7.78815	speed
10	3	Non_targeting_hpRNA_glial_mHTT	6.99881	speed		4	4	Non_targeting_hpRNA_glial_mHTT	6.44811	speed		4	4	Non_targeting_hpRNA_glial_mHTT	6.44811	speed
2	4	Non_targeting_hpRNA_glial_mHTT	11.6946	speed		4	5	Non_targeting_hpRNA_glial_mHTT	10.727	speed		4	5	Non_targeting_hpRNA_glial_mHTT	10.727	speed
2	5	Non_targeting_hpRNA_glial_mHTT	12.322	speed		5	3	Non_targeting_hpRNA_glial_mHTT	7.63764	speed		5	3	Non_targeting_hpRNA_glial_mHTT	7.63764	speed
2	6	Non_targeting_hpRNA_glial_mHTT	11.7243	speed		5	4	Non_targeting_hpRNA_glial_mHTT	9.00362	speed		5	4	Non_targeting_hpRNA_glial_mHTT	9.00362	speed
2	7	Non_targeting_hpRNA_glial_mHTT	11.9576	speed		5	5	Non_targeting_hpRNA_glial_mHTT	6.61344	speed		5	5	Non_targeting_hpRNA_glial_mHTT	6.61344	speed
2	8	Non_targeting_hpRNA_glial_mHTT	10.4241	speed		6	3	Non_targeting_hpRNA_glial_mHTT	7.03368	speed		6	3	Non_targeting_hpRNA_glial_mHTT	7.03368	speed
2	9	Non_targeting_hpRNA_glial_mHTT	11.88	speed		6	4	Non_targeting_hpRNA_glial_mHTT	8.17837	speed		6	4	Non_targeting_hpRNA_glial_mHTT	8.17837	speed
3	4	Non_targeting_hpRNA_glial_mHTT	11.9101	speed		6	5	Non_targeting_hpRNA_glial_mHTT	4.80799	speed		6	5	Non_targeting_hpRNA_glial_mHTT	4.80799	speed
3	5	Non_targeting_hpRNA_glial_mHTT	12.1479	speed		7	3	Non_targeting_hpRNA_glial_mHTT	3.50538	speed		7	3	Non_targeting_hpRNA_glial_mHTT	3.50538	speed
3	6	Non_targeting_hpRNA_glial_mHTT	12.3648	speed		7	4	Non_targeting_hpRNA_glial_mHTT	5.17438	speed		7	4	Non_targeting_hpRNA_glial_mHTT	5.17438	speed
3	7	Non_targeting_hpRNA_glial_mHTT	13.3803	speed		7	5	Non_targeting_hpRNA_glial_mHTT	1.83189	speed		7	5	Non_targeting_hpRNA_glial_mHTT	1.83189	speed
3	8	Non_targeting_hpRNA_glial_mHTT	10.8529	speed		8	3	Non_targeting_hpRNA_glial_mHTT	5.40236	speed		8	3	Non_targeting_hpRNA_glial_mHTT	5.40236	speed
3	9	Non_targeting_hpRNA_glial_mHTT	11.6781	speed		8	4	Non_targeting_hpRNA_glial_mHTT	4.93599	speed		8	4	Non_targeting_hpRNA_glial_mHTT	4.93599	speed
4	4	Non_targeting_hpRNA_glial_mHTT	8.41563	speed		8	5	Non_targeting_hpRNA_glial_mHTT	5.66823	speed		8	5	Non_targeting_hpRNA_glial_mHTT	5.66823	speed
4	5	Non_targeting_hpRNA_glial_mHTT	11.4763	speed		9	3	Non_targeting_hpRNA_glial_mHTT	2.16147	speed		9	3	Non_targeting_hpRNA_glial_mHTT	2.16147	speed
4	6	Non_targeting_hpRNA_glial_mHTT	10.7076	speed		9	4	Non_targeting_hpRNA_glial_mHTT	2.57011	speed		9	4	Non_targeting_hpRNA_glial_mHTT	2.57011	speed
4	7	Non_targeting_hpRNA_glial_mHTT	10.2271	speed		9	5	Non_targeting_hpRNA_glial_mHTT	1.9203	speed		9	5	Non_targeting_hpRNA_glial_mHTT	1.9203	speed
4	8	Non_targeting_hpRNA_glial_mHTT	10.6616	speed		1	6	Non_targeting_hpRNA_glial_mHTT	10.9354	speed		1	6	Non_targeting_hpRNA_glial_mHTT	10.9354	speed
4	9	Non_targeting_hpRNA_glial_mHTT	10.7341	speed		2	6	Non_targeting_hpRNA_glial_mHTT	11.6443	speed		2	6	Non_targeting_hpRNA_glial_mHTT	11.6443	speed
5	4	Non_targeting_hpRNA_glial_mHTT	7.73139	speed		3	6	Non_targeting_hpRNA_glial_mHTT	13.4473	speed		3	6	Non_targeting_hpRNA_glial_mHTT	13.4473	speed
5	5	Non_targeting_hpRNA_glial_mHTT	8.67637	speed		4	6	Non_targeting_hpRNA_glial_mHTT	9.2254	speed		4	6	Non_targeting_hpRNA_glial_mHTT	9.2254	speed
5	6	Non_targeting_hpRNA_glial_mHTT	8.29841	speed		5	6	Non_targeting_hpRNA_glial_mHTT	11.5363	speed		5	6	Non_targeting_hpRNA_glial_mHTT	11.5363	speed
5	7	Non_targeting_hpRNA_glial_mHTT	5.94291	speed		6	6	Non_targeting_hpRNA_glial_mHTT	4.02543	speed		6	6	Non_targeting_hpRNA_glial_mHTT	4.02543	speed
5	8	Non_targeting_hpRNA_glial_mHTT	7.57793	speed		7	6	Non_targeting_hpRNA_glial_mHTT	2.12227	speed		7	6	Non_targeting_hpRNA_glial_mHTT	2.12227	speed
5	9	Non_targeting_hpRNA_glial_mHTT	9.04111	speed		8	6	Non_targeting_hpRNA_glial_mHTT	4.74043	speed		8	6	Non_targeting_hpRNA_glial_mHTT	4.74043	speed
6	4	Non_targeting_hpRNA_glial_mHTT	7.13998	speed		9	6	Non_targeting_hpRNA_glial_mHTT	4.6059	speed		9	6	Non_targeting_hpRNA_glial_mHTT	4.6059	speed
6	5	Non_targeting_hpRNA_glial_mHTT	8.83237	speed		1	1	siHTT_glial_mHTT	12.5356	speed		1	1	siHTT_glial_mHTT	12.5356	speed
6	6	Non_targeting_hpRNA_glial_mHTT	7.65282	speed		1	2	siHTT_glial_mHTT	11.4488	speed		1	2	siHTT_glial_mHTT	11.4488	speed
6	7	Non_targeting_hpRNA_glial_mHTT	7.90555	speed		2	1	siHTT_glial_mHTT	12.1656	speed		2	1	siHTT_glial_mHTT	12.1656	speed
6	8	Non_targeting_hpRNA_glial_mHTT	8.78279	speed		2	2	siHTT_glial_mHTT	13.2191	speed		2	2	siHTT_glial_mHTT	13.2191	speed
6	9	Non_targeting_hpRNA_glial_mHTT	9.46893	speed		3	1	siHTT_glial_mHTT	13.6606	speed		3	1	siHTT_glial_mHTT	13.6606	speed
7	4	Non_targeting_hpRNA_glial_mHTT	5.6189	speed		3	2	siHTT_glial_mHTT	11.9763	speed		3	2	siHTT_glial_mHTT	11.9763	speed
7	5	Non_targeting_hpRNA_glial_mHTT	5.35695	speed		4	1	siHTT_glial_mHTT	13.0399	speed		4	1	siHTT_glial_mHTT	13.0399	speed
7	6	Non_targeting_hpRNA_glial_mHTT	6.16701	speed		4	2	siHTT_glial_mHTT	10.0979	speed		4	2	siHTT_glial_mHTT	10.0979	speed
7	7	Non_targeting_hpRNA_glial_mHTT	6.5794	speed		5	1	siHTT_glial_mHTT	13.4475	speed		5	1	siHTT_glial_mHTT	13.4475	speed
7	8	Non_targeting_hpRNA_glial_mHTT	3.15871	speed		5	2	siHTT_glial_mHTT	11.978	speed		5	2	siHTT_glial_mHTT	11.978	speed
7	9	Non_targeting_hpRNA_glial_mHTT	6.84853	speed		6	1	siHTT_glial_mHTT	13.5401	speed		6	1	siHTT_glial_mHTT	13.5401	speed
8	4	Non_targeting_hpRNA_glial_mHTT	3.70587	speed		6	2	siHTT_glial_mHTT	11.5133	speed		6	2	siHTT_glial_mHTT	11.5133	speed
8	5	Non_targeting_hpRNA_glial_mHTT	5.43729	speed		7	1	siHTT_glial_mHTT	12.4868	speed		7	1	siHTT_glial_mHTT	12.4868	speed
8	6	Non_targeting_hpRNA_glial_mHTT	4.08136	speed		7	2	siHTT_glial_mHTT	12.7704	speed		7	2	siHTT_glial_mHTT	12.7704	speed
8	7	Non_targeting_hpRNA_glial_mHTT	6.7945	speed		8	1	siHTT_glial_mHTT	11.8278	speed		8	1	siHTT_glial_mHTT	11.8278	speed
8	8	Non_targeting_hpRNA_glial_mHTT	5.31661	speed		8	2	siHTT_glial_mHTT	13.1025	speed		8	2	siHTT_glial_mHTT	13.1025	speed
8	9	Non_targeting_hpRNA_glial_mHTT	5.52046	speed		1	2	siHTT_glial_mHTT	10.2567	speed		1	2	siHTT_glial_mHTT	10.2567	speed
9	4	Non_targeting_hpRNA_glial_mHTT	4.34657	speed		1	3	siHTT_glial_mHTT	9.56936	speed		1	3	siHTT_glial_mHTT	9.56936	speed
9	5	Non_targeting_hpRNA_glial_mHTT	2.85177	speed		1	4	siHTT_glial_mHTT	11.8178	speed		1	4	siHTT_glial_mHTT	11.8178	speed
9	6	Non_targeting_hpRNA_glial_mHTT	4.6864	speed		2	2	siHTT_glial_mHTT	12.7563	speed		2	2	siHTT_glial_mHTT	12.7563	speed
9	7	Non_targeting_hpRNA_glial_mHTT	4.86627	speed		2	3	siHTT_glial_mHTT	13.1716	speed		2	3	siHTT_glial_mHTT	13.1716	speed
9	8	Non_targeting_hpRNA_glial_mHTT	5.56095	speed		2	4	siHTT_glial_mHTT	13.6013	speed		2	4	siHTT_glial_mHTT	13.6013	speed
9	9	Non_targeting_hpRNA_glial_mHTT	5.22565	speed		3	2	siHTT_glial_mHTT	14.3955	speed		3	2	siHTT_glial_mHTT	14.3955	speed
10	4	Non_targeting_hpRNA_glial_mHTT	5.04009	speed		3	3	siHTT_glial_mHTT	12.5809	speed		3	3	siHTT_glial_mHTT	12.5809	speed
10	5	Non_targeting_hpRNA_glial_mHTT	6.0648	speed		3	4	siHTT_glial_mHTT	13.2191	speed		3	4	siHTT_glial_mHTT	13.2191	speed
10	6	Non_targeting_hpRNA_glial_mHTT	5.77228	speed		4	2	siHTT_glial_mHTT	13.2839	speed		4	2	siHTT_glial_mHTT	13.2839	speed
10	7	Non_targeting_hpRNA_glial_mHTT	5.35377	speed		4	3	siHTT_glial_mHTT	13.8132	speed		4	3	siHTT_glial_mHTT	13.8132	speed
10	8	Non_targeting_hpRNA_glial_mHTT	6.00173	speed		4	4	siHTT_glial_mHTT	12.4869	speed		4	4	siHTT_glial_mHTT	12.4869	speed
10	9	Non_targeting_hpRNA_glial_mHTT	5.95935	speed		5	2	siHTT_glial_mHTT	13.31	speed		5	2	siHTT_glial_mHTT	13.31	speed
2	1	siHTT_glial_mHTT	13.2992	speed		5	3	siHTT_glial_mHTT	10.8609	speed		5	3	siHTT_glial_mHTT	10.8609	speed
2	2	siHTT_glial_mHTT	13.3696	speed		5	4	siHTT_glial_mHTT	13.15	speed		5	4	siHTT_glial_mHTT	13.15	speed
2	3	siHTT_glial_mHTT	13.4244	speed		6	2	siHTT_glial_mHTT	10.7814	speed		6	2	siHTT_glial_mHTT	10.7814	speed
3	1	siHTT_glial_mHTT	12.2189	speed		6	3	siHTT_glial_mHTT	14.081	speed		6	3	siHTT_glial_mHTT	14.081	speed
3	2	siHTT_glial_mHTT	15.1816	speed		6	4	siHTT_glial_mHTT	13.5522	speed		6	4	siHTT_glial_mHTT	13.5522	speed
3	3	siHTT_glial_mHTT	13.605	speed		7	2	siHTT_glial_mHTT	12.7851	speed		7	2	siHTT_glial_mHTT	12.7851	speed
4	1	siHTT_glial_mHTT	9.0569	speed		7	3	siHTT_glial_mHTT	12.3284	speed		7	3	siHTT_glial_mHTT	12.3284	speed
4	2	siHTT_glial_mHTT	11.138	speed		7	4	siHTT_glial_mHTT	11.6353	speed		7	4	siHTT_glial_mHTT	11.6353	speed
4	3	siHTT_glial_mHTT	11.5359	speed		8	2	siHTT_glial_mHTT	12.551	speed		8	2	siHTT_glial_mHTT	12.551	speed
5	1	siHTT_glial_mHTT	10.8251	speed		8	3	siHTT_glial_mHTT	12.3522	speed		8	3	siHTT_glial_mHTT	12.3522	speed
5	2	siHTT_glial_mHTT	12.4236	speed		8	4	siHTT_glial_mHTT	11.9198	speed		8	4	siHTT_glial_mHTT	11.9198	speed
5	3	siHTT_glial_mHTT	11.2458	speed		9	2	siHTT_glial_mHTT	12.8324	speed		9	2	siHTT_glial_mHTT	12.8324	speed
6	1	siHTT_glial_mHTT	11.8401	speed		9	3	siHTT_glial_mHTT	12.288	speed		9	3	siHTT_glial_mHTT	12.288	speed
6	2	siHTT_glial_mHTT	13.5891	speed		9	4	siHTT_glial_mHTT	11.3166	speed		9	4	siHTT_glial_mHTT	11.3166	speed
6	3	siHTT_glial_mHTT	12.2754	speed		1	5	siHTT_glial_mHTT	11.3322	speed		1	5	siHTT_glial_mHTT	11.3322	speed
7	1	siHTT_glial_mHTT	11.1653	speed		1	6	siHTT_glial_mHTT	11.6054	speed		1	6	siHTT_glial_mHTT	11.6054	speed
7	2	siHTT_glial_mHTT	11.6307	speed		1	7	siHTT_glial_mHTT	10.7686	speed		1	7	siHTT_glial_mHTT	10.7686	speed
7	3	siHTT_glial_mHTT	11.1752	speed		2	5	siHTT_glial_mHTT	11.9043	speed		2	5	siHTT_glial_mHTT	11.9043	speed
8	1	siHTT_glial_mHTT	12.4244	speed		2	6	siHTT_glial_mHTT	11.5123	speed		2	6	siHTT_glial_mHTT	11.5123	speed
8	2	siHTT_glial_mHTT	12.1311	speed		2	7	siHTT_glial_mHTT	5.13955	speed		2	7	siHTT_glial_mHTT	5.13955	speed
8	3	siHTT_glial_mHTT	11.0372	speed		3	5	siHTT_glial_mHTT	14.1215	speed		3	5	siHTT_glial_mHTT	14.1215	speed
9	1	siHTT_glial_mHTT	11.8206	speed		3	6	siHTT_glial_mHTT	14.713	speed		3	6	siHTT_glial_mHTT	14.713	speed
9	2	siHTT_glial_mHTT	10.974	speed		3	7	siHTT_glial_mHTT	12.4855	speed		3	7	siHTT_glial_mHTT	12.4855	speed
9	3	siHTT_glial_mHTT	11.8046	speed		4	5	siHTT_glial_mHTT	13.1075	speed		4	5	siHTT_glial_mHTT	13.1075	speed
10	1	siHTT_glial_mHTT	12.2077	speed		4	6	siHTT_glial_mHTT	12.9115	speed		4	6	siHTT_glial_mHTT	12.9115	speed
10	2	siHTT_glial_mHTT	11.9961	speed		4	7	siHTT_glial_mHTT	13.2786	speed		4	7	siHTT_glial_mHTT	13.2786	speed
10	3	siHTT_glial_mHTT	11.2358	speed		5	5	siHTT_glial_mHTT	12.6432	speed		5	5	siHTT_glial_mHTT	12.6432	speed
2	4	siHTT_glial_mHTT	12.0412	speed		5	6	siHTT_glial_mHTT	10.2839	speed		5	6	siHTT_glial_mHTT	10.2839	speed
2	5	siHTT_glial_mHTT	13.1155	speed		5	7	siHTT_glial_mHTT	11.408	speed		5	7	siHTT_glial_mHTT	11.408	speed
2	6	siHTT_glial_mHTT	13.2336	speed		6	5	siHTT_glial_mHTT	13.2561	speed		6	5	siHTT_glial_mHTT	13.2561	speed
2	7	siHTT_glial_mHTT	11.8445	speed		6	6	siHTT_glial_mHTT	12.3061	speed		6	6	siHTT_glial_mHTT	12.3061	speed
2	8	siHTT_glial_mHTT	12.1505	speed		6	7	siHTT_glial_mHTT	11.9249	speed		6	7	siHTT_glial_mHTT	11.9249	speed
3	4	siHTT_glial_mHTT	13.8722	speed		7	5	siHTT_glial_mHTT	12.5336	speed		7	5	siHTT_glial_mHTT	12.5336	speed
3	5	siHTT_glial_mHTT	13.3553	speed		7	6	siHTT_glial_mHTT	11.9912	speed		7	6	siHTT_glial_mHTT	11.9912	speed
3	6	siHTT_glial_mHTT	12.6795	speed		7	7	siHTT_glial_mHTT	11.0928	speed		7	7	siHTT_glial_mHTT	11.0928	speed
3	7	siHTT_glial_mHTT	12.2869	speed		8	5	siHTT_glial_mHTT	12.2642	speed		8	5	siHTT_glial_mHTT	12.2642	speed
3	8	siHTT_glial_mHTT	12.6874	speed		8	6	siHTT_glial_mHTT	14.0586	speed		8	6	siHTT_glial_mHTT	14.0586	speed
4	4	siHTT_glial_mHTT	12.913	speed		8	7	siHTT_glial_mHTT	11.0016	speed		8	7	siHTT_glial_mHTT	11.0016	speed
4	5	siHTT_glial_mHTT	12.3921	speed		9	5	siHTT_glial_mHTT	9.9565	speed		9	5	siHTT_glial_mHTT	9.9565	speed
4	6	siHTT_glial_mHTT	11.0439	speed		9	6	siHTT_glial_mHTT	12.5028	speed		9	6	siHTT_glial_mHTT	12.5028	speed
4	7	siHTT_glial_mHTT	10.6887	speed		9	7	siHTT_glial_mHTT	9.82817	speed		9	7	siHTT_glial_mHTT	9.82817	speed
4	8	siHTT_glial_mHTT	11.7876	speed		1	1	32408 glial_mHTT	10.9752	speed		1	1	55467 glial_mHTT	13.2773	speed
5	4	siHTT_glial_mHTT	11.9177	speed		1	2	32408 glial_mHTT	10.4541	speed		2	1	55467 glial_mHTT	11.9372	speed
5	5	siHTT_glial_mHTT	12.4605	speed		1	3	32408 glial_mHTT	11.3138	speed		3	1	55467 glial_mHTT	13.763	speed
5	6	siHTT_glial_mHTT	11.0883	speed		1	4	32408 glial_mHTT	11.8165	speed		4	1	55467 glial_mHTT	13.4779	speed
5	7	siHTT_glial_mHTT	11.2689	speed		1	5	32408 glial_mHTT	12.275	speed		5	1	55467 glial_mHTT	11.3571	speed
5	8	siHTT_glial_mHTT	11.3274	speed		2	1	32408 glial_mHTT	12.8853	speed		6	1	55467 glial_mHTT	7.01085	speed
6	4	siHTT_glial_mHTT	11.056	speed		2	2	32408 glial_mHTT	10.9768	speed		7	1	55467 glial_mHTT	7.74715	speed
6	5	siHTT_glial_mHTT	11.9035	speed		2	3	32408 glial_mHTT	13.861	speed		8	1	55467 glial_mHTT	9.0593	speed
6	6	siHTT_glial_mHTT	10.2836	speed		2	4	32408 glial_mHTT	13.1907	speed		1	2	55467 glial_mHTT	9.83657	speed
6	7	siHTT_glial_mHTT	11.5262	speed		2	5	32408 glial_mHTT	13.1852	speed		1	3	55467 glial_mHTT	11.2066	speed
6	8	siHTT_glial_mHTT	13.6128	speed		3	1	32408 glial_mHTT	14.6414	speed		1	4	55467 glial_mHTT	10.2094	speed
7	4	siHTT_glial_mHTT	10.765	speed		3	2	32408 glial_mHTT	13.572	speed		1	5	55467 glial_mHTT	10.4389	speed
7	5	siHTT_glial_mHTT	11.6304	speed		3	3	32408 glial_mHTT	12.0041	speed		2	2	55467 glial_mHTT	12.4931	speed
7	6	siHTT_glial_mHTT	8.73746	speed		3	4	32408 glial_mHTT	11.857	speed		2	3	55467 glial_mHTT	13.3634	speed
7	7	siHTT_glial_mHTT	10.5596	speed		3	5	32408 glial_mHTT	12.686	speed		2	4	55467 glial_mHTT	14.2442	speed
7	8	siHTT_glial_mHTT	9.94202	speed		4	1	32408 glial_mHTT	14.3168	speed		2	5	55467 glial_mHTT	11.6269	speed
8	4	siHTT_glial_mHTT	11.6355	speed		4	2	32408 glial_mHTT	12.1066	speed		3	2	55467 glial_mHTT	10.5058	speed
8	5	siHTT_glial_mHTT	12.9402	speed		4	3	32408 glial_mHTT	12.5397	speed		3	3	55467 glial_mHTT	12.7857	speed
8	6	siHTT_glial_mHTT	10.6889	speed		4	4	32408 glial_mHTT	13.3336	speed		3	4	55467 glial_mHTT	12.7345	speed
8	7	siHTT_glial_mHTT	9.80732	speed		4	5	32408 glial_mHTT	11.1649	speed		3	5	55467 glial_mHTT	11.6361	speed
8	8	siHTT_glial_mHTT	11.5471	speed		5	1	32408 glial_mHTT	12.8172	speed		4	2	55467 glial_mHTT	11.1133	speed
9	4	siHTT_glial_mHTT	11.4795	speed		5	2	32408 glial_mHTT	14.4844	speed		4	3	55467 glial_mHTT	12.8202	speed
9	5	siHTT_glial_mHTT	12.4085	speed		5	3	32408 glial_mHTT	11.651	speed		4	4	55467 glial_mHTT	12.9266	speed
9	6	siHTT_glial_mHTT	9.7591	speed		5	4	32408 glial_mHTT	12.3943	speed		4	5	55467 glial_mHTT	10.4877	speed
9	7	siHTT_glial_mHTT	10.2836	speed		5	5	32408 glial_mHTT	11.256	speed		5	2	55467 glial_mHTT	10.4856	speed
9	8	siHTT_glial_mHTT	11.8668	speed		6	1	32408 glial_mHTT	15.0734	speed		5	3	55467 glial_mHTT	11.7244	speed
10	4	siHTT_glial_mHTT	13.3354	speed		6	2	32408 glial_mHTT	14.5284	speed		5	4	55467 glial_mHTT	13.0013	speed
10	5	siHTT_glial_mHTT	9.84851	speed		6	3	32408 glial_mHTT	15.0763	speed		5	5	55467 glial_mHTT	8.78322	speed
10	6	siHTT_glial_mHTT	12.4092	speed		6	4	32408 glial_mHTT	14.1698	speed		6	2	55467 glial_mHTT	11.2715	speed
10	7	siHTT_glial_mHTT	11.8995	speed		6	5	32408 glial_mHTT	11.8549	speed		6	3	55467 glial_mHTT	10.9466	speed
10	8	siHTT_glial_mHTT	13.2458	speed		7	1	32408 glial_mHTT	13.508	speed		6	4	55467 glial_mHTT	12.1389	speed
2	1	21977 glial_mHTT	13.7131	speed		7	2	32408 glial_mHTT	11.9963	speed		6	5	55467 glial_mHTT	10.681	speed
2	2	21977 glial_mHTT	13.5917	speed		7	3	32408 glial_mHTT	13.0457	speed		7	2	55467 glial_mHTT	8.65951	speed
2	3	21977 glial_mHTT	13.1689	speed		7	4	32408 glial_mHTT	11.7132	speed		7	3	55467 glial_mHTT	9.65352	speed
2	4	21977 glial_mHTT	14.712	speed		7	5	32408 glial_mHTT	10.0275	speed		7	4	55467 glial_mHTT	6.00753	speed
2	5	21977 glial_mHTT	10.6777	speed		8	1	32408 glial_mHTT	13.6917	speed		7	5	55467 glial_mHTT	9.55679	speed
3	1	21977 glial_mHTT	13.4393	speed		8	2	32408 glial_mHTT	12.3524	speed		8	2	55467 glial_mHTT	9.14984	speed
3	2	21977 glial_mHTT	13.2354	speed		8	3	32408 glial_mHTT	12.821	speed		8	3	55467 glial_mHTT	9.66736	speed
3	3	21977 glial_mHTT	14.1805	speed		8	4	32408 glial_mHTT	11.2054	speed		8	4	55467 glial_mHTT	10.2107	speed
3	4	21977 glial_mHTT	13.2632	speed		8	5	32408 glial_mHTT	9.43162	speed		8	5	55467 glial_mHTT	9.59427	speed
3	5	21977 glial_mHTT	14.4869	speed		9	1	32408 glial_mHTT	11.3595	speed		9	2	55467 glial_mHTT	7.3079	speed
4	1	21977 glial_mHTT	11.3869	speed		9	2	32408 glial_mHTT	12.0281	speed		9	3	55467 glial_mHTT	7.60593	speed
4	2	21977 glial_mHTT	9.30668	speed		9	3	32408 glial_mHTT	11.9164	speed		9	4	55467 glial_mHTT	8.87561	speed
4	3	21977 glial_mHTT	10.2279	speed		9	4	32408 glial_mHTT	12.5018	speed		9	5	55467 glial_mHTT	9.27715	speed
4	4	21977 glial_mHTT	11.64	speed		9	5	32408 glial_mHTT	9.16242	speed
4	5	21977 glial_mHTT	10.3983	speed
5	1	21977 glial_mHTT	11.0212	speed
5	2	21977 glial_mHTT	10.4855	speed
5	3	21977 glial_mHTT	10.7261	speed
5	4	21977 glial_mHTT	12.2913	speed
5	5	21977 glial_mHTT	10.6001	speed
6	1	21977 glial_mHTT	10.7966	speed
6	2	21977 glial_mHTT	12.1506	speed
6	3	21977 glial_mHTT	10.872	speed
6	4	21977 glial_mHTT	10.6134	speed
6	5	21977 glial_mHTT	9.29129	speed
7	1	21977 glial_mHTT	7.55431	speed
7	2	21977 glial_mHTT	9.28761	speed
7	3	21977 glial_mHTT	8.71981	speed
7	4	21977 glial_mHTT	9.44749	speed
7	5	21977 glial_mHTT	7.67036	speed
8	1	21977 glial_mHTT	8.5478	speed
8	2	21977 glial_mHTT	8.88607	speed
8	3	21977 glial_mHTT	9.16919	speed
8	4	21977 glial_mHTT	9.99314	speed
8	5	21977 glial_mHTT	7.5818	speed
9	1	21977 glial_mHTT	9.17304	speed
9	2	21977 glial_mHTT	10.0086	speed
9	3	21977 glial_mHTT	7.36454	speed
9	4	21977 glial_mHTT	10.3067	speed
9	5	21977 glial_mHTT	9.03196	speed
10	1	21977 glial_mHTT	8.52878	speed
10	2	21977 glial_mHTT	4.02311	speed
10	3	21977 glial_mHTT	7.86896	speed
10	4	21977 glial_mHTT	8.444	speed
10	5	21977 glial_mHTT	5.8817	speed

## Sheet: SLITRK5
kek6 BDSC 34407						kek5 BDSC 51204						kek5 BDSC 56624
Trialday	Replicate	Genotype	Observation	Metric		Trialday	Replicate	Genotype	Observation	Metric		Trialday	Replicate	Genotype	Observation	Metric
1	1	Non_targeting_hpRNA_glial_mHTT	12.186	speed		1	1	siHTT_glial_mHTT	14.6983	speed		1	1	Non_targeting_hpRNA_glial_mHTT	12.186	speed
1	2	Non_targeting_hpRNA_glial_mHTT	12.7909	speed		1	2	siHTT_glial_mHTT	13.9544	speed		1	2	Non_targeting_hpRNA_glial_mHTT	12.7909	speed
2	1	Non_targeting_hpRNA_glial_mHTT	11.6151	speed		1	3	siHTT_glial_mHTT	14.8766	speed		2	1	Non_targeting_hpRNA_glial_mHTT	11.6151	speed
2	2	Non_targeting_hpRNA_glial_mHTT	12.1219	speed		2	1	siHTT_glial_mHTT	12.9743	speed		2	2	Non_targeting_hpRNA_glial_mHTT	12.1219	speed
3	1	Non_targeting_hpRNA_glial_mHTT	9.94744	speed		2	2	siHTT_glial_mHTT	13.7748	speed		3	1	Non_targeting_hpRNA_glial_mHTT	9.94744	speed
3	2	Non_targeting_hpRNA_glial_mHTT	11.7971	speed		2	3	siHTT_glial_mHTT	13.3707	speed		3	2	Non_targeting_hpRNA_glial_mHTT	11.7971	speed
4	1	Non_targeting_hpRNA_glial_mHTT	9.85299	speed		3	1	siHTT_glial_mHTT	13.9163	speed		4	1	Non_targeting_hpRNA_glial_mHTT	9.85299	speed
4	2	Non_targeting_hpRNA_glial_mHTT	10.6864	speed		3	2	siHTT_glial_mHTT	14.3869	speed		4	2	Non_targeting_hpRNA_glial_mHTT	10.6864	speed
5	1	Non_targeting_hpRNA_glial_mHTT	5.32302	speed		3	3	siHTT_glial_mHTT	15.6896	speed		5	1	Non_targeting_hpRNA_glial_mHTT	5.32302	speed
5	2	Non_targeting_hpRNA_glial_mHTT	10.4062	speed		4	1	siHTT_glial_mHTT	13.8129	speed		5	2	Non_targeting_hpRNA_glial_mHTT	10.4062	speed
6	1	Non_targeting_hpRNA_glial_mHTT	1.35658	speed		4	2	siHTT_glial_mHTT	15.7395	speed		6	1	Non_targeting_hpRNA_glial_mHTT	1.35658	speed
6	2	Non_targeting_hpRNA_glial_mHTT	6.91932	speed		4	3	siHTT_glial_mHTT	13.8324	speed		6	2	Non_targeting_hpRNA_glial_mHTT	6.91932	speed
7	1	Non_targeting_hpRNA_glial_mHTT	8.64577	speed		5	1	siHTT_glial_mHTT	13.2202	speed		7	1	Non_targeting_hpRNA_glial_mHTT	8.64577	speed
7	2	Non_targeting_hpRNA_glial_mHTT	8.6402	speed		5	2	siHTT_glial_mHTT	14.4498	speed		7	2	Non_targeting_hpRNA_glial_mHTT	8.6402	speed
8	1	Non_targeting_hpRNA_glial_mHTT	5.00066	speed		5	3	siHTT_glial_mHTT	14.3465	speed		8	1	Non_targeting_hpRNA_glial_mHTT	5.00066	speed
8	2	Non_targeting_hpRNA_glial_mHTT	6.39159	speed		6	1	siHTT_glial_mHTT	13.7867	speed		8	2	Non_targeting_hpRNA_glial_mHTT	6.39159	speed
1	3	Non_targeting_hpRNA_glial_mHTT	11.5646	speed		6	2	siHTT_glial_mHTT	12.248	speed		1	3	Non_targeting_hpRNA_glial_mHTT	11.5646	speed
1	4	Non_targeting_hpRNA_glial_mHTT	10.6456	speed		6	3	siHTT_glial_mHTT	13.3773	speed		1	4	Non_targeting_hpRNA_glial_mHTT	10.6456	speed
1	5	Non_targeting_hpRNA_glial_mHTT	8.89028	speed		7	1	siHTT_glial_mHTT	13.3907	speed		1	5	Non_targeting_hpRNA_glial_mHTT	8.89028	speed
2	3	Non_targeting_hpRNA_glial_mHTT	9.55612	speed		7	2	siHTT_glial_mHTT	13.4884	speed		2	3	Non_targeting_hpRNA_glial_mHTT	9.55612	speed
2	4	Non_targeting_hpRNA_glial_mHTT	12.9619	speed		7	3	siHTT_glial_mHTT	13.1857	speed		2	4	Non_targeting_hpRNA_glial_mHTT	12.9619	speed
2	5	Non_targeting_hpRNA_glial_mHTT	12.984	speed		8	1	siHTT_glial_mHTT	13.3474	speed		2	5	Non_targeting_hpRNA_glial_mHTT	12.984	speed
3	3	Non_targeting_hpRNA_glial_mHTT	9.64493	speed		8	2	siHTT_glial_mHTT	13.7372	speed		3	3	Non_targeting_hpRNA_glial_mHTT	9.64493	speed
3	4	Non_targeting_hpRNA_glial_mHTT	12.1723	speed		8	3	siHTT_glial_mHTT	12.7545	speed		3	4	Non_targeting_hpRNA_glial_mHTT	12.1723	speed
3	5	Non_targeting_hpRNA_glial_mHTT	10.8503	speed		9	1	siHTT_glial_mHTT	11.0971	speed		3	5	Non_targeting_hpRNA_glial_mHTT	10.8503	speed
4	3	Non_targeting_hpRNA_glial_mHTT	7.78815	speed		9	2	siHTT_glial_mHTT	12.4282	speed		4	3	Non_targeting_hpRNA_glial_mHTT	7.78815	speed
4	4	Non_targeting_hpRNA_glial_mHTT	6.44811	speed		9	3	siHTT_glial_mHTT	12.5166	speed		4	4	Non_targeting_hpRNA_glial_mHTT	6.44811	speed
4	5	Non_targeting_hpRNA_glial_mHTT	10.727	speed		10	1	siHTT_glial_mHTT	11.0369	speed		4	5	Non_targeting_hpRNA_glial_mHTT	10.727	speed
5	3	Non_targeting_hpRNA_glial_mHTT	7.63764	speed		10	2	siHTT_glial_mHTT	12.2654	speed		5	3	Non_targeting_hpRNA_glial_mHTT	7.63764	speed
5	4	Non_targeting_hpRNA_glial_mHTT	9.00362	speed		10	3	siHTT_glial_mHTT	9.9732	speed		5	4	Non_targeting_hpRNA_glial_mHTT	9.00362	speed
5	5	Non_targeting_hpRNA_glial_mHTT	6.61344	speed		1	5	siHTT_glial_mHTT	12.735	speed		5	5	Non_targeting_hpRNA_glial_mHTT	6.61344	speed
6	3	Non_targeting_hpRNA_glial_mHTT	7.03368	speed		1	6	siHTT_glial_mHTT	13.402	speed		6	3	Non_targeting_hpRNA_glial_mHTT	7.03368	speed
6	4	Non_targeting_hpRNA_glial_mHTT	8.17837	speed		1	7	siHTT_glial_mHTT	11.2455	speed		6	4	Non_targeting_hpRNA_glial_mHTT	8.17837	speed
6	5	Non_targeting_hpRNA_glial_mHTT	4.80799	speed		1	8	siHTT_glial_mHTT	11.0892	speed		6	5	Non_targeting_hpRNA_glial_mHTT	4.80799	speed
7	3	Non_targeting_hpRNA_glial_mHTT	3.50538	speed		1	9	siHTT_glial_mHTT	12.8551	speed		7	3	Non_targeting_hpRNA_glial_mHTT	3.50538	speed
7	4	Non_targeting_hpRNA_glial_mHTT	5.17438	speed		2	5	siHTT_glial_mHTT	14.4491	speed		7	4	Non_targeting_hpRNA_glial_mHTT	5.17438	speed
7	5	Non_targeting_hpRNA_glial_mHTT	1.83189	speed		2	6	siHTT_glial_mHTT	14.1297	speed		7	5	Non_targeting_hpRNA_glial_mHTT	1.83189	speed
8	3	Non_targeting_hpRNA_glial_mHTT	5.40236	speed		2	7	siHTT_glial_mHTT	14.4706	speed		8	3	Non_targeting_hpRNA_glial_mHTT	5.40236	speed
8	4	Non_targeting_hpRNA_glial_mHTT	4.93599	speed		2	8	siHTT_glial_mHTT	14.1541	speed		8	4	Non_targeting_hpRNA_glial_mHTT	4.93599	speed
8	5	Non_targeting_hpRNA_glial_mHTT	5.66823	speed		2	9	siHTT_glial_mHTT	13.3369	speed		8	5	Non_targeting_hpRNA_glial_mHTT	5.66823	speed
9	3	Non_targeting_hpRNA_glial_mHTT	2.16147	speed		3	5	siHTT_glial_mHTT	13.9978	speed		9	3	Non_targeting_hpRNA_glial_mHTT	2.16147	speed
9	4	Non_targeting_hpRNA_glial_mHTT	2.57011	speed		3	6	siHTT_glial_mHTT	12.6193	speed		9	4	Non_targeting_hpRNA_glial_mHTT	2.57011	speed
9	5	Non_targeting_hpRNA_glial_mHTT	1.9203	speed		3	7	siHTT_glial_mHTT	14.2305	speed		9	5	Non_targeting_hpRNA_glial_mHTT	1.9203	speed
1	6	Non_targeting_hpRNA_glial_mHTT	10.9354	speed		3	8	siHTT_glial_mHTT	12.8186	speed		1	6	Non_targeting_hpRNA_glial_mHTT	10.9354	speed
2	6	Non_targeting_hpRNA_glial_mHTT	11.6443	speed		3	9	siHTT_glial_mHTT	13.3705	speed		2	6	Non_targeting_hpRNA_glial_mHTT	11.6443	speed
3	6	Non_targeting_hpRNA_glial_mHTT	13.4473	speed		4	5	siHTT_glial_mHTT	15.0272	speed		3	6	Non_targeting_hpRNA_glial_mHTT	13.4473	speed
4	6	Non_targeting_hpRNA_glial_mHTT	9.2254	speed		4	6	siHTT_glial_mHTT	14.3367	speed		4	6	Non_targeting_hpRNA_glial_mHTT	9.2254	speed
5	6	Non_targeting_hpRNA_glial_mHTT	11.5363	speed		4	7	siHTT_glial_mHTT	15.7071	speed		5	6	Non_targeting_hpRNA_glial_mHTT	11.5363	speed
6	6	Non_targeting_hpRNA_glial_mHTT	4.02543	speed		4	8	siHTT_glial_mHTT	15.8445	speed		6	6	Non_targeting_hpRNA_glial_mHTT	4.02543	speed
7	6	Non_targeting_hpRNA_glial_mHTT	2.12227	speed		4	9	siHTT_glial_mHTT	15.2903	speed		7	6	Non_targeting_hpRNA_glial_mHTT	2.12227	speed
8	6	Non_targeting_hpRNA_glial_mHTT	4.74043	speed		5	5	siHTT_glial_mHTT	13.7611	speed		8	6	Non_targeting_hpRNA_glial_mHTT	4.74043	speed
9	6	Non_targeting_hpRNA_glial_mHTT	4.6059	speed		5	6	siHTT_glial_mHTT	11.5944	speed		9	6	Non_targeting_hpRNA_glial_mHTT	4.6059	speed
1	1	siHTT_glial_mHTT	12.5356	speed		5	7	siHTT_glial_mHTT	14.1516	speed		1	1	siHTT_glial_mHTT	12.5356	speed
1	2	siHTT_glial_mHTT	11.4488	speed		5	8	siHTT_glial_mHTT	9.68	speed		1	2	siHTT_glial_mHTT	11.4488	speed
2	1	siHTT_glial_mHTT	12.1656	speed		5	9	siHTT_glial_mHTT	13.3417	speed		2	1	siHTT_glial_mHTT	12.1656	speed
2	2	siHTT_glial_mHTT	13.2191	speed		6	5	siHTT_glial_mHTT	13.7765	speed		2	2	siHTT_glial_mHTT	13.2191	speed
3	1	siHTT_glial_mHTT	13.6606	speed		6	6	siHTT_glial_mHTT	12.6438	speed		3	1	siHTT_glial_mHTT	13.6606	speed
3	2	siHTT_glial_mHTT	11.9763	speed		6	7	siHTT_glial_mHTT	13.96	speed		3	2	siHTT_glial_mHTT	11.9763	speed
4	1	siHTT_glial_mHTT	13.0399	speed		6	8	siHTT_glial_mHTT	13.2865	speed		4	1	siHTT_glial_mHTT	13.0399	speed
4	2	siHTT_glial_mHTT	10.0979	speed		6	9	siHTT_glial_mHTT	13.6165	speed		4	2	siHTT_glial_mHTT	10.0979	speed
5	1	siHTT_glial_mHTT	13.4475	speed		7	5	siHTT_glial_mHTT	14.1565	speed		5	1	siHTT_glial_mHTT	13.4475	speed
5	2	siHTT_glial_mHTT	11.978	speed		7	6	siHTT_glial_mHTT	11.9023	speed		5	2	siHTT_glial_mHTT	11.978	speed
6	1	siHTT_glial_mHTT	13.5401	speed		7	7	siHTT_glial_mHTT	13.6582	speed		6	1	siHTT_glial_mHTT	13.5401	speed
6	2	siHTT_glial_mHTT	11.5133	speed		7	8	siHTT_glial_mHTT	14.479	speed		6	2	siHTT_glial_mHTT	11.5133	speed
7	1	siHTT_glial_mHTT	12.4868	speed		7	9	siHTT_glial_mHTT	13.6656	speed		7	1	siHTT_glial_mHTT	12.4868	speed
7	2	siHTT_glial_mHTT	12.7704	speed		8	5	siHTT_glial_mHTT	12.3725	speed		7	2	siHTT_glial_mHTT	12.7704	speed
8	1	siHTT_glial_mHTT	11.8278	speed		8	6	siHTT_glial_mHTT	12.4704	speed		8	1	siHTT_glial_mHTT	11.8278	speed
8	2	siHTT_glial_mHTT	13.1025	speed		8	7	siHTT_glial_mHTT	13.9575	speed		8	2	siHTT_glial_mHTT	13.1025	speed
1	2	siHTT_glial_mHTT	10.2567	speed		8	8	siHTT_glial_mHTT	13.853	speed		1	2	siHTT_glial_mHTT	10.2567	speed
1	3	siHTT_glial_mHTT	9.56936	speed		8	9	siHTT_glial_mHTT	13.5608	speed		1	3	siHTT_glial_mHTT	9.56936	speed
1	4	siHTT_glial_mHTT	11.8178	speed		9	5	siHTT_glial_mHTT	12.647	speed		1	4	siHTT_glial_mHTT	11.8178	speed
2	2	siHTT_glial_mHTT	12.7563	speed		9	6	siHTT_glial_mHTT	12.7331	speed		2	2	siHTT_glial_mHTT	12.7563	speed
2	3	siHTT_glial_mHTT	13.1716	speed		9	7	siHTT_glial_mHTT	12.8289	speed		2	3	siHTT_glial_mHTT	13.1716	speed
2	4	siHTT_glial_mHTT	13.6013	speed		9	8	siHTT_glial_mHTT	11.7203	speed		2	4	siHTT_glial_mHTT	13.6013	speed
3	2	siHTT_glial_mHTT	14.3955	speed		9	9	siHTT_glial_mHTT	11.7217	speed		3	2	siHTT_glial_mHTT	14.3955	speed
3	3	siHTT_glial_mHTT	12.5809	speed		10	5	siHTT_glial_mHTT	10.4857	speed		3	3	siHTT_glial_mHTT	12.5809	speed
3	4	siHTT_glial_mHTT	13.2191	speed		10	6	siHTT_glial_mHTT	10.9892	speed		3	4	siHTT_glial_mHTT	13.2191	speed
4	2	siHTT_glial_mHTT	13.2839	speed		10	7	siHTT_glial_mHTT	12.9136	speed		4	2	siHTT_glial_mHTT	13.2839	speed
4	3	siHTT_glial_mHTT	13.8132	speed		10	8	siHTT_glial_mHTT	11.3468	speed		4	3	siHTT_glial_mHTT	13.8132	speed
4	4	siHTT_glial_mHTT	12.4869	speed		10	9	siHTT_glial_mHTT	10.6724	speed		4	4	siHTT_glial_mHTT	12.4869	speed
5	2	siHTT_glial_mHTT	13.31	speed		1	1	Non_targeting_hpRNA_glial_mHTT	14.3498	speed		5	2	siHTT_glial_mHTT	13.31	speed
5	3	siHTT_glial_mHTT	10.8609	speed		1	2	Non_targeting_hpRNA_glial_mHTT	10.2378	speed		5	3	siHTT_glial_mHTT	10.8609	speed
5	4	siHTT_glial_mHTT	13.15	speed		1	3	Non_targeting_hpRNA_glial_mHTT	14.4732	speed		5	4	siHTT_glial_mHTT	13.15	speed
6	2	siHTT_glial_mHTT	10.7814	speed		1	4	Non_targeting_hpRNA_glial_mHTT	13.2945	speed		6	2	siHTT_glial_mHTT	10.7814	speed
6	3	siHTT_glial_mHTT	14.081	speed		1	5	Non_targeting_hpRNA_glial_mHTT	13.8127	speed		6	3	siHTT_glial_mHTT	14.081	speed
6	4	siHTT_glial_mHTT	13.5522	speed		1	6	Non_targeting_hpRNA_glial_mHTT	14.776	speed		6	4	siHTT_glial_mHTT	13.5522	speed
7	2	siHTT_glial_mHTT	12.7851	speed		2	1	Non_targeting_hpRNA_glial_mHTT	12.6336	speed		7	2	siHTT_glial_mHTT	12.7851	speed
7	3	siHTT_glial_mHTT	12.3284	speed		2	2	Non_targeting_hpRNA_glial_mHTT	11.9371	speed		7	3	siHTT_glial_mHTT	12.3284	speed
7	4	siHTT_glial_mHTT	11.6353	speed		2	3	Non_targeting_hpRNA_glial_mHTT	13.5202	speed		7	4	siHTT_glial_mHTT	11.6353	speed
8	2	siHTT_glial_mHTT	12.551	speed		2	4	Non_targeting_hpRNA_glial_mHTT	12.886	speed		8	2	siHTT_glial_mHTT	12.551	speed
8	3	siHTT_glial_mHTT	12.3522	speed		2	5	Non_targeting_hpRNA_glial_mHTT	12.6859	speed		8	3	siHTT_glial_mHTT	12.3522	speed
8	4	siHTT_glial_mHTT	11.9198	speed		2	6	Non_targeting_hpRNA_glial_mHTT	13.679	speed		8	4	siHTT_glial_mHTT	11.9198	speed
9	2	siHTT_glial_mHTT	12.8324	speed		3	1	Non_targeting_hpRNA_glial_mHTT	10.6717	speed		9	2	siHTT_glial_mHTT	12.8324	speed
9	3	siHTT_glial_mHTT	12.288	speed		3	2	Non_targeting_hpRNA_glial_mHTT	10.4668	speed		9	3	siHTT_glial_mHTT	12.288	speed
9	4	siHTT_glial_mHTT	11.3166	speed		3	3	Non_targeting_hpRNA_glial_mHTT	9.19962	speed		9	4	siHTT_glial_mHTT	11.3166	speed
1	5	siHTT_glial_mHTT	11.3322	speed		3	4	Non_targeting_hpRNA_glial_mHTT	11.0672	speed		1	5	siHTT_glial_mHTT	11.3322	speed
1	6	siHTT_glial_mHTT	11.6054	speed		3	5	Non_targeting_hpRNA_glial_mHTT	10.6973	speed		1	6	siHTT_glial_mHTT	11.6054	speed
1	7	siHTT_glial_mHTT	10.7686	speed		3	6	Non_targeting_hpRNA_glial_mHTT	10.7479	speed		1	7	siHTT_glial_mHTT	10.7686	speed
2	5	siHTT_glial_mHTT	11.9043	speed		4	1	Non_targeting_hpRNA_glial_mHTT	10.8075	speed		2	5	siHTT_glial_mHTT	11.9043	speed
2	6	siHTT_glial_mHTT	11.5123	speed		4	2	Non_targeting_hpRNA_glial_mHTT	9.76811	speed		2	6	siHTT_glial_mHTT	11.5123	speed
2	7	siHTT_glial_mHTT	5.13955	speed		4	3	Non_targeting_hpRNA_glial_mHTT	8.67595	speed		2	7	siHTT_glial_mHTT	5.13955	speed
3	5	siHTT_glial_mHTT	14.1215	speed		4	4	Non_targeting_hpRNA_glial_mHTT	8.81947	speed		3	5	siHTT_glial_mHTT	14.1215	speed
3	6	siHTT_glial_mHTT	14.713	speed		4	5	Non_targeting_hpRNA_glial_mHTT	11.4573	speed		3	6	siHTT_glial_mHTT	14.713	speed
3	7	siHTT_glial_mHTT	12.4855	speed		4	6	Non_targeting_hpRNA_glial_mHTT	9.04697	speed		3	7	siHTT_glial_mHTT	12.4855	speed
4	5	siHTT_glial_mHTT	13.1075	speed		5	1	Non_targeting_hpRNA_glial_mHTT	7.42801	speed		4	5	siHTT_glial_mHTT	13.1075	speed
4	6	siHTT_glial_mHTT	12.9115	speed		5	2	Non_targeting_hpRNA_glial_mHTT	8.70971	speed		4	6	siHTT_glial_mHTT	12.9115	speed
4	7	siHTT_glial_mHTT	13.2786	speed		5	3	Non_targeting_hpRNA_glial_mHTT	8.32988	speed		4	7	siHTT_glial_mHTT	13.2786	speed
5	5	siHTT_glial_mHTT	12.6432	speed		5	4	Non_targeting_hpRNA_glial_mHTT	8.64195	speed		5	5	siHTT_glial_mHTT	12.6432	speed
5	6	siHTT_glial_mHTT	10.2839	speed		5	5	Non_targeting_hpRNA_glial_mHTT	10.2817	speed		5	6	siHTT_glial_mHTT	10.2839	speed
5	7	siHTT_glial_mHTT	11.408	speed		5	6	Non_targeting_hpRNA_glial_mHTT	7.39609	speed		5	7	siHTT_glial_mHTT	11.408	speed
6	5	siHTT_glial_mHTT	13.2561	speed		6	1	Non_targeting_hpRNA_glial_mHTT	6.01934	speed		6	5	siHTT_glial_mHTT	13.2561	speed
6	6	siHTT_glial_mHTT	12.3061	speed		6	2	Non_targeting_hpRNA_glial_mHTT	4.19339	speed		6	6	siHTT_glial_mHTT	12.3061	speed
6	7	siHTT_glial_mHTT	11.9249	speed		6	3	Non_targeting_hpRNA_glial_mHTT	7.96493	speed		6	7	siHTT_glial_mHTT	11.9249	speed
7	5	siHTT_glial_mHTT	12.5336	speed		6	4	Non_targeting_hpRNA_glial_mHTT	2.89764	speed		7	5	siHTT_glial_mHTT	12.5336	speed
7	6	siHTT_glial_mHTT	11.9912	speed		6	5	Non_targeting_hpRNA_glial_mHTT	2.66243	speed		7	6	siHTT_glial_mHTT	11.9912	speed
7	7	siHTT_glial_mHTT	11.0928	speed		6	6	Non_targeting_hpRNA_glial_mHTT	3.22459	speed		7	7	siHTT_glial_mHTT	11.0928	speed
8	5	siHTT_glial_mHTT	12.2642	speed		7	1	Non_targeting_hpRNA_glial_mHTT	2.25996	speed		8	5	siHTT_glial_mHTT	12.2642	speed
8	6	siHTT_glial_mHTT	14.0586	speed		7	2	Non_targeting_hpRNA_glial_mHTT	5.08265	speed		8	6	siHTT_glial_mHTT	14.0586	speed
8	7	siHTT_glial_mHTT	11.0016	speed		7	3	Non_targeting_hpRNA_glial_mHTT	6.60984	speed		8	7	siHTT_glial_mHTT	11.0016	speed
9	5	siHTT_glial_mHTT	9.9565	speed		7	4	Non_targeting_hpRNA_glial_mHTT	1.64096	speed		9	5	siHTT_glial_mHTT	9.9565	speed
9	6	siHTT_glial_mHTT	12.5028	speed		7	5	Non_targeting_hpRNA_glial_mHTT	6.31938	speed		9	6	siHTT_glial_mHTT	12.5028	speed
9	7	siHTT_glial_mHTT	9.82817	speed		7	6	Non_targeting_hpRNA_glial_mHTT	2.07706	speed		9	7	siHTT_glial_mHTT	9.82817	speed
1	1	34407 glial_mHTT	11.9561	speed		8	1	Non_targeting_hpRNA_glial_mHTT	4.38614	speed		1	1	56624 glial_mHTT	12.7187	speed
1	2	34407 glial_mHTT	11.8927	speed		8	2	Non_targeting_hpRNA_glial_mHTT	3.12321	speed		1	2	56624 glial_mHTT	12.1988	speed
1	3	34407 glial_mHTT	12.1073	speed		8	3	Non_targeting_hpRNA_glial_mHTT	2.99439	speed		1	3	56624 glial_mHTT	12.1428	speed
1	4	34407 glial_mHTT	11.3186	speed		8	4	Non_targeting_hpRNA_glial_mHTT	1.34242	speed		1	4	56624 glial_mHTT	12.0309	speed
1	5	34407 glial_mHTT	11.9671	speed		8	5	Non_targeting_hpRNA_glial_mHTT	1.67448	speed		1	5	56624 glial_mHTT	6.63685	speed
2	1	34407 glial_mHTT	13.8571	speed		8	6	Non_targeting_hpRNA_glial_mHTT	4.26906	speed		2	1	56624 glial_mHTT	14.1252	speed
2	2	34407 glial_mHTT	12.0592	speed		9	1	Non_targeting_hpRNA_glial_mHTT	3.61807	speed		2	2	56624 glial_mHTT	14.1742	speed
2	3	34407 glial_mHTT	12.7351	speed		9	2	Non_targeting_hpRNA_glial_mHTT	2.89527	speed		2	3	56624 glial_mHTT	14.6864	speed
2	4	34407 glial_mHTT	13.5477	speed		9	3	Non_targeting_hpRNA_glial_mHTT	2.68766	speed		2	4	56624 glial_mHTT	12.3612	speed
2	5	34407 glial_mHTT	12.9532	speed		9	4	Non_targeting_hpRNA_glial_mHTT	2.88832	speed		2	5	56624 glial_mHTT	14.2726	speed
3	1	34407 glial_mHTT	14.7983	speed		9	5	Non_targeting_hpRNA_glial_mHTT	3.65966	speed		3	1	56624 glial_mHTT	14.6079	speed
3	2	34407 glial_mHTT	14.2701	speed		9	6	Non_targeting_hpRNA_glial_mHTT	3.00907	speed		3	2	56624 glial_mHTT	13.9778	speed
3	3	34407 glial_mHTT	14.8615	speed		10	1	Non_targeting_hpRNA_glial_mHTT	5.28803	speed		3	3	56624 glial_mHTT	13.659	speed
3	4	34407 glial_mHTT	14.4591	speed		10	2	Non_targeting_hpRNA_glial_mHTT	2.33555	speed		3	4	56624 glial_mHTT	11.2257	speed
3	5	34407 glial_mHTT	14.2661	speed		10	3	Non_targeting_hpRNA_glial_mHTT	2.26193	speed		3	5	56624 glial_mHTT	11.3368	speed
4	1	34407 glial_mHTT	13.2146	speed		10	4	Non_targeting_hpRNA_glial_mHTT	5.98024	speed		4	1	56624 glial_mHTT	14.3727	speed
4	2	34407 glial_mHTT	13.1299	speed		10	5	Non_targeting_hpRNA_glial_mHTT	2.13988	speed		4	2	56624 glial_mHTT	13.9266	speed
4	3	34407 glial_mHTT	12.4074	speed		10	6	Non_targeting_hpRNA_glial_mHTT	3.63654	speed		4	3	56624 glial_mHTT	13.6861	speed
4	4	34407 glial_mHTT	12.6198	speed		1	7	Non_targeting_hpRNA_glial_mHTT	12.3337	speed		4	4	56624 glial_mHTT	10.2669	speed
4	5	34407 glial_mHTT	13.2408	speed		1	8	Non_targeting_hpRNA_glial_mHTT	12.1311	speed		4	5	56624 glial_mHTT	13.1786	speed
5	1	34407 glial_mHTT	12.4784	speed		1	9	Non_targeting_hpRNA_glial_mHTT	12.4799	speed		5	1	56624 glial_mHTT	12.4066	speed
5	2	34407 glial_mHTT	12.7256	speed		1	10	Non_targeting_hpRNA_glial_mHTT	11.0705	speed		5	2	56624 glial_mHTT	13.5307	speed
5	3	34407 glial_mHTT	12.4975	speed		1	11	Non_targeting_hpRNA_glial_mHTT	12.4959	speed		5	3	56624 glial_mHTT	10.4786	speed
5	4	34407 glial_mHTT	12.728	speed		2	7	Non_targeting_hpRNA_glial_mHTT	12.9435	speed		5	4	56624 glial_mHTT	9.30686	speed
5	5	34407 glial_mHTT	13.5346	speed		2	8	Non_targeting_hpRNA_glial_mHTT	12.6084	speed		5	5	56624 glial_mHTT	10.5892	speed
6	1	34407 glial_mHTT	12.7207	speed		2	9	Non_targeting_hpRNA_glial_mHTT	12.6024	speed		6	1	56624 glial_mHTT	11.9114	speed
6	2	34407 glial_mHTT	12.3827	speed		2	10	Non_targeting_hpRNA_glial_mHTT	11.8015	speed		6	2	56624 glial_mHTT	12.5642	speed
6	3	34407 glial_mHTT	12.8348	speed		2	11	Non_targeting_hpRNA_glial_mHTT	12.5721	speed		6	3	56624 glial_mHTT	13.6437	speed
6	4	34407 glial_mHTT	14.4534	speed		3	7	Non_targeting_hpRNA_glial_mHTT	8.95917	speed		6	4	56624 glial_mHTT	11.2433	speed
6	5	34407 glial_mHTT	12.3856	speed		3	8	Non_targeting_hpRNA_glial_mHTT	10.1323	speed		6	5	56624 glial_mHTT	12.3691	speed
7	1	34407 glial_mHTT	9.32164	speed		3	9	Non_targeting_hpRNA_glial_mHTT	8.82169	speed		7	1	56624 glial_mHTT	7.21143	speed
7	2	34407 glial_mHTT	9.87523	speed		3	10	Non_targeting_hpRNA_glial_mHTT	10.344	speed		7	2	56624 glial_mHTT	10.533	speed
7	3	34407 glial_mHTT	9.44333	speed		3	11	Non_targeting_hpRNA_glial_mHTT	10.2276	speed		7	3	56624 glial_mHTT	9.06561	speed
7	4	34407 glial_mHTT	14.413	speed		4	7	Non_targeting_hpRNA_glial_mHTT	9.17405	speed		7	4	56624 glial_mHTT	7.82499	speed
7	5	34407 glial_mHTT	8.49682	speed		4	8	Non_targeting_hpRNA_glial_mHTT	10.6582	speed		7	5	56624 glial_mHTT	8.68739	speed
8	1	34407 glial_mHTT	8.37002	speed		4	9	Non_targeting_hpRNA_glial_mHTT	9.19565	speed		8	1	56624 glial_mHTT	9.88958	speed
8	2	34407 glial_mHTT	9.90848	speed		4	10	Non_targeting_hpRNA_glial_mHTT	9.56018	speed		8	2	56624 glial_mHTT	11.3515	speed
8	3	34407 glial_mHTT	7.46589	speed		4	11	Non_targeting_hpRNA_glial_mHTT	10.2975	speed		8	3	56624 glial_mHTT	9.88124	speed
8	4	34407 glial_mHTT	14.0436	speed		5	7	Non_targeting_hpRNA_glial_mHTT	9.49693	speed		8	4	56624 glial_mHTT	6.20589	speed
8	5	34407 glial_mHTT	10.1744	speed		5	8	Non_targeting_hpRNA_glial_mHTT	9.22347	speed		8	5	56624 glial_mHTT	8.36587	speed
9	1	34407 glial_mHTT	9.86535	speed		5	9	Non_targeting_hpRNA_glial_mHTT	9.11455	speed		9	1	56624 glial_mHTT	4.61884	speed
9	2	34407 glial_mHTT	10.8293	speed		5	10	Non_targeting_hpRNA_glial_mHTT	8.64865	speed		9	2	56624 glial_mHTT	7.27346	speed
9	3	34407 glial_mHTT	9.9737	speed		5	11	Non_targeting_hpRNA_glial_mHTT	9.631	speed		9	3	56624 glial_mHTT	5.02214	speed
9	4	34407 glial_mHTT	11.5848	speed		6	7	Non_targeting_hpRNA_glial_mHTT	7.67594	speed		9	4	56624 glial_mHTT	4.33867	speed
9	5	34407 glial_mHTT	10.3979	speed		6	8	Non_targeting_hpRNA_glial_mHTT	3.58495	speed		9	5	56624 glial_mHTT	4.56826	speed
						6	9	Non_targeting_hpRNA_glial_mHTT	8.18404	speed
						6	10	Non_targeting_hpRNA_glial_mHTT	4.32908	speed
						6	11	Non_targeting_hpRNA_glial_mHTT	8.25545	speed
						7	7	Non_targeting_hpRNA_glial_mHTT	2.87928	speed
						7	8	Non_targeting_hpRNA_glial_mHTT	2.69238	speed
						7	9	Non_targeting_hpRNA_glial_mHTT	5.7798	speed
						7	10	Non_targeting_hpRNA_glial_mHTT	4.34853	speed
						7	11	Non_targeting_hpRNA_glial_mHTT	5.32132	speed
						8	7	Non_targeting_hpRNA_glial_mHTT	3.15239	speed
						8	8	Non_targeting_hpRNA_glial_mHTT	5.52424	speed
						8	9	Non_targeting_hpRNA_glial_mHTT	2.98982	speed
						8	10	Non_targeting_hpRNA_glial_mHTT	2.73057	speed
						8	11	Non_targeting_hpRNA_glial_mHTT	5.60799	speed
						9	7	Non_targeting_hpRNA_glial_mHTT	3.15606	speed
						9	8	Non_targeting_hpRNA_glial_mHTT	3.54301	speed
						9	9	Non_targeting_hpRNA_glial_mHTT	3.80226	speed
						9	10	Non_targeting_hpRNA_glial_mHTT	1.91368	speed
						9	11	Non_targeting_hpRNA_glial_mHTT	2.08747	speed
						10	7	Non_targeting_hpRNA_glial_mHTT	1.57969	speed
						10	8	Non_targeting_hpRNA_glial_mHTT	2.26035	speed
						10	9	Non_targeting_hpRNA_glial_mHTT	4.80145	speed
						10	10	Non_targeting_hpRNA_glial_mHTT	2.03875	speed
						10	11	Non_targeting_hpRNA_glial_mHTT	2.44403	speed
						1	1	51204 glial_mHTT	12.3451	speed
						1	2	51204 glial_mHTT	12.436	speed
						1	3	51204 glial_mHTT	12.7007	speed
						1	4	51204 glial_mHTT	11.4374	speed
						1	5	51204 glial_mHTT	12.2179	speed
						2	1	51204 glial_mHTT	14.5351	speed
						2	2	51204 glial_mHTT	13.193	speed
						2	3	51204 glial_mHTT	13.1191	speed
						2	4	51204 glial_mHTT	13.1019	speed
						2	5	51204 glial_mHTT	15.388	speed
						3	1	51204 glial_mHTT	13.0102	speed
						3	2	51204 glial_mHTT	12.3404	speed
						3	3	51204 glial_mHTT	12.4023	speed
						3	4	51204 glial_mHTT	12.7023	speed
						3	5	51204 glial_mHTT	14.6554	speed
						4	1	51204 glial_mHTT	13.8695	speed
						4	2	51204 glial_mHTT	15.6047	speed
						4	3	51204 glial_mHTT	13.486	speed
						4	4	51204 glial_mHTT	12.8901	speed
						4	5	51204 glial_mHTT	15.085	speed
						5	1	51204 glial_mHTT	11.3115	speed
						5	2	51204 glial_mHTT	11.3701	speed
						5	3	51204 glial_mHTT	10.4323	speed
						5	4	51204 glial_mHTT	10.9781	speed
						5	5	51204 glial_mHTT	12.8558	speed
						6	1	51204 glial_mHTT	11.7251	speed
						6	2	51204 glial_mHTT	11.2609	speed
						6	3	51204 glial_mHTT	11.2253	speed
						6	4	51204 glial_mHTT	10.5436	speed
						6	5	51204 glial_mHTT	13.4482	speed
						7	1	51204 glial_mHTT	8.15304	speed
						7	2	51204 glial_mHTT	10.6679	speed
						7	3	51204 glial_mHTT	8.33966	speed
						7	4	51204 glial_mHTT	9.17066	speed
						7	5	51204 glial_mHTT	11.6622	speed
						8	1	51204 glial_mHTT	10.069	speed
						8	2	51204 glial_mHTT	8.21579	speed
						8	3	51204 glial_mHTT	5.42016	speed
						8	4	51204 glial_mHTT	7.29143	speed
						8	5	51204 glial_mHTT	10.2776	speed
						9	1	51204 glial_mHTT	6.14134	speed
						9	2	51204 glial_mHTT	4.63978	speed
						9	3	51204 glial_mHTT	4.11982	speed
						9	4	51204 glial_mHTT	5.22346	speed
						9	5	51204 glial_mHTT	4.98553	speed
						10	1	51204 glial_mHTT	6.50203	speed
						10	2	51204 glial_mHTT	3.44287	speed
						10	3	51204 glial_mHTT	3.97012	speed
						10	4	51204 glial_mHTT	2.8466	speed
						10	5	51204 glial_mHTT	6.97579	speed

## Sheet: SYT7
syt7 BDSC 23394						syt7 VDRC 24988						syt7 BDSC 60791
Trialday	Replicate	Genotype	Observation	Metric		Trialday	Replicate	Genotype	Observation	Metric		Trialday	Pos	Replicate	Genotype	Observation	Metric
2	1	Non_targeting_hpRNA_glial_mHTT	14.2278	speed		1	1	siHTT_glial_mHTT	11.6776	speed		1	A01	1	Non_targeting_hpRNA_glial_mHTT	12.186	speed
2	2	Non_targeting_hpRNA_glial_mHTT	15.5571	speed		2	1	siHTT_glial_mHTT	12.0328	speed		1	B02	2	Non_targeting_hpRNA_glial_mHTT	12.7909	speed
2	3	Non_targeting_hpRNA_glial_mHTT	14.5411	speed		3	1	siHTT_glial_mHTT	11.3722	speed		2	A01	1	Non_targeting_hpRNA_glial_mHTT	11.6151	speed
3	1	Non_targeting_hpRNA_glial_mHTT	12.1723	speed		4	1	siHTT_glial_mHTT	11.8439	speed		2	B02	2	Non_targeting_hpRNA_glial_mHTT	12.1219	speed
3	2	Non_targeting_hpRNA_glial_mHTT	12.2934	speed		5	1	siHTT_glial_mHTT	8.98182	speed		3	A01	1	Non_targeting_hpRNA_glial_mHTT	9.94744	speed
3	3	Non_targeting_hpRNA_glial_mHTT	9.53973	speed		6	1	siHTT_glial_mHTT	10.4872	speed		3	B02	2	Non_targeting_hpRNA_glial_mHTT	11.7971	speed
4	1	Non_targeting_hpRNA_glial_mHTT	8.78102	speed		7	1	siHTT_glial_mHTT	11.0565	speed		4	A01	1	Non_targeting_hpRNA_glial_mHTT	9.85299	speed
4	2	Non_targeting_hpRNA_glial_mHTT	10.7369	speed		8	1	siHTT_glial_mHTT	9.43098	speed		4	B02	2	Non_targeting_hpRNA_glial_mHTT	10.6864	speed
4	3	Non_targeting_hpRNA_glial_mHTT	9.95084	speed		9	1	siHTT_glial_mHTT	10.2866	speed		5	A01	1	Non_targeting_hpRNA_glial_mHTT	5.32302	speed
5	1	Non_targeting_hpRNA_glial_mHTT	5.73557	speed		1	2	siHTT_glial_mHTT	11.1304	speed		5	B02	2	Non_targeting_hpRNA_glial_mHTT	10.4062	speed
5	2	Non_targeting_hpRNA_glial_mHTT	9.92094	speed		1	3	siHTT_glial_mHTT	11.7432	speed		6	A01	1	Non_targeting_hpRNA_glial_mHTT	1.35658	speed
5	3	Non_targeting_hpRNA_glial_mHTT	10.0181	speed		1	4	siHTT_glial_mHTT	12.178	speed		6	B02	2	Non_targeting_hpRNA_glial_mHTT	6.91932	speed
6	1	Non_targeting_hpRNA_glial_mHTT	4.91453	speed		1	5	siHTT_glial_mHTT	12.2026	speed		7	A01	1	Non_targeting_hpRNA_glial_mHTT	8.64577	speed
6	2	Non_targeting_hpRNA_glial_mHTT	9.42369	speed		1	6	siHTT_glial_mHTT	10.5363	speed		7	B02	2	Non_targeting_hpRNA_glial_mHTT	8.6402	speed
6	3	Non_targeting_hpRNA_glial_mHTT	9.29628	speed		1	7	siHTT_glial_mHTT	11.2252	speed		8	A01	1	Non_targeting_hpRNA_glial_mHTT	5.00066	speed
7	1	Non_targeting_hpRNA_glial_mHTT	4.65538	speed		1	8	siHTT_glial_mHTT	9.85915	speed		8	B02	2	Non_targeting_hpRNA_glial_mHTT	6.39159	speed
7	2	Non_targeting_hpRNA_glial_mHTT	4.87125	speed		1	9	siHTT_glial_mHTT	10.2241	speed		1	A01	3	Non_targeting_hpRNA_glial_mHTT	11.5646	speed
7	3	Non_targeting_hpRNA_glial_mHTT	8.14019	speed		1	10	siHTT_glial_mHTT	11.864	speed		1	C02	4	Non_targeting_hpRNA_glial_mHTT	10.6456	speed
8	1	Non_targeting_hpRNA_glial_mHTT	3.44567	speed		1	11	siHTT_glial_mHTT	12.2195	speed		1	G02	5	Non_targeting_hpRNA_glial_mHTT	8.89028	speed
8	2	Non_targeting_hpRNA_glial_mHTT	5.02795	speed		2	2	siHTT_glial_mHTT	12.1171	speed		2	A01	3	Non_targeting_hpRNA_glial_mHTT	9.55612	speed
8	3	Non_targeting_hpRNA_glial_mHTT	4.10722	speed		2	3	siHTT_glial_mHTT	13.7433	speed		2	C02	4	Non_targeting_hpRNA_glial_mHTT	12.9619	speed
9	1	Non_targeting_hpRNA_glial_mHTT	6.6524	speed		2	4	siHTT_glial_mHTT	11.6015	speed		2	G02	5	Non_targeting_hpRNA_glial_mHTT	12.984	speed
9	2	Non_targeting_hpRNA_glial_mHTT	7.84532	speed		2	5	siHTT_glial_mHTT	13.3805	speed		3	A01	3	Non_targeting_hpRNA_glial_mHTT	9.64493	speed
9	3	Non_targeting_hpRNA_glial_mHTT	7.73044	speed		2	6	siHTT_glial_mHTT	11.7028	speed		3	C02	4	Non_targeting_hpRNA_glial_mHTT	12.1723	speed
10	1	Non_targeting_hpRNA_glial_mHTT	3.7822	speed		2	7	siHTT_glial_mHTT	12.5929	speed		3	G02	5	Non_targeting_hpRNA_glial_mHTT	10.8503	speed
10	2	Non_targeting_hpRNA_glial_mHTT	3.05975	speed		2	8	siHTT_glial_mHTT	12.7692	speed		4	A01	3	Non_targeting_hpRNA_glial_mHTT	7.78815	speed
10	3	Non_targeting_hpRNA_glial_mHTT	6.99881	speed		2	9	siHTT_glial_mHTT	11.7835	speed		4	C02	4	Non_targeting_hpRNA_glial_mHTT	6.44811	speed
2	4	Non_targeting_hpRNA_glial_mHTT	11.6946	speed		2	10	siHTT_glial_mHTT	13.1984	speed		4	G02	5	Non_targeting_hpRNA_glial_mHTT	10.727	speed
2	5	Non_targeting_hpRNA_glial_mHTT	12.322	speed		2	11	siHTT_glial_mHTT	12.3759	speed		5	A01	3	Non_targeting_hpRNA_glial_mHTT	7.63764	speed
2	6	Non_targeting_hpRNA_glial_mHTT	11.7243	speed		3	2	siHTT_glial_mHTT	11.4314	speed		5	C02	4	Non_targeting_hpRNA_glial_mHTT	9.00362	speed
2	7	Non_targeting_hpRNA_glial_mHTT	11.9576	speed		3	3	siHTT_glial_mHTT	12.8252	speed		5	G02	5	Non_targeting_hpRNA_glial_mHTT	6.61344	speed
2	8	Non_targeting_hpRNA_glial_mHTT	10.4241	speed		3	4	siHTT_glial_mHTT	11.1103	speed		6	A01	3	Non_targeting_hpRNA_glial_mHTT	7.03368	speed
2	9	Non_targeting_hpRNA_glial_mHTT	11.88	speed		3	5	siHTT_glial_mHTT	13.9536	speed		6	C02	4	Non_targeting_hpRNA_glial_mHTT	8.17837	speed
3	4	Non_targeting_hpRNA_glial_mHTT	11.9101	speed		3	6	siHTT_glial_mHTT	12.2395	speed		6	G02	5	Non_targeting_hpRNA_glial_mHTT	4.80799	speed
3	5	Non_targeting_hpRNA_glial_mHTT	12.1479	speed		3	7	siHTT_glial_mHTT	11.9881	speed		7	A01	3	Non_targeting_hpRNA_glial_mHTT	3.50538	speed
3	6	Non_targeting_hpRNA_glial_mHTT	12.3648	speed		3	8	siHTT_glial_mHTT	12.4933	speed		7	C02	4	Non_targeting_hpRNA_glial_mHTT	5.17438	speed
3	7	Non_targeting_hpRNA_glial_mHTT	13.3803	speed		3	9	siHTT_glial_mHTT	12.0104	speed		7	G02	5	Non_targeting_hpRNA_glial_mHTT	1.83189	speed
3	8	Non_targeting_hpRNA_glial_mHTT	10.8529	speed		3	10	siHTT_glial_mHTT	12.5815	speed		8	A01	3	Non_targeting_hpRNA_glial_mHTT	5.40236	speed
3	9	Non_targeting_hpRNA_glial_mHTT	11.6781	speed		3	11	siHTT_glial_mHTT	13.2395	speed		8	C02	4	Non_targeting_hpRNA_glial_mHTT	4.93599	speed
4	4	Non_targeting_hpRNA_glial_mHTT	8.41563	speed		3	12	siHTT_glial_mHTT	12.7287	speed		8	G02	5	Non_targeting_hpRNA_glial_mHTT	5.66823	speed
4	5	Non_targeting_hpRNA_glial_mHTT	11.4763	speed		4	2	siHTT_glial_mHTT	12.3754	speed		9	A01	3	Non_targeting_hpRNA_glial_mHTT	2.16147	speed
4	6	Non_targeting_hpRNA_glial_mHTT	10.7076	speed		4	3	siHTT_glial_mHTT	13.2131	speed		9	C02	4	Non_targeting_hpRNA_glial_mHTT	2.57011	speed
4	7	Non_targeting_hpRNA_glial_mHTT	10.2271	speed		4	4	siHTT_glial_mHTT	11.0852	speed		9	G02	5	Non_targeting_hpRNA_glial_mHTT	1.9203	speed
4	8	Non_targeting_hpRNA_glial_mHTT	10.6616	speed		4	5	siHTT_glial_mHTT	6.14971	speed		1	A01	6	Non_targeting_hpRNA_glial_mHTT	10.9354	speed
4	9	Non_targeting_hpRNA_glial_mHTT	10.7341	speed		4	6	siHTT_glial_mHTT	12.4154	speed		2	A01	6	Non_targeting_hpRNA_glial_mHTT	11.6443	speed
5	4	Non_targeting_hpRNA_glial_mHTT	7.73139	speed		4	7	siHTT_glial_mHTT	11.4226	speed		3	A01	6	Non_targeting_hpRNA_glial_mHTT	13.4473	speed
5	5	Non_targeting_hpRNA_glial_mHTT	8.67637	speed		4	8	siHTT_glial_mHTT	12.7347	speed		4	A01	6	Non_targeting_hpRNA_glial_mHTT	9.2254	speed
5	6	Non_targeting_hpRNA_glial_mHTT	8.29841	speed		4	9	siHTT_glial_mHTT	11.9037	speed		5	A01	6	Non_targeting_hpRNA_glial_mHTT	11.5363	speed
5	7	Non_targeting_hpRNA_glial_mHTT	5.94291	speed		4	10	siHTT_glial_mHTT	11.0361	speed		6	A01	6	Non_targeting_hpRNA_glial_mHTT	4.02543	speed
5	8	Non_targeting_hpRNA_glial_mHTT	7.57793	speed		4	11	siHTT_glial_mHTT	7.16206	speed		7	A01	6	Non_targeting_hpRNA_glial_mHTT	2.12227	speed
5	9	Non_targeting_hpRNA_glial_mHTT	9.04111	speed		4	12	siHTT_glial_mHTT	12.3715	speed		8	A01	6	Non_targeting_hpRNA_glial_mHTT	4.74043	speed
6	4	Non_targeting_hpRNA_glial_mHTT	7.13998	speed		5	2	siHTT_glial_mHTT	10.2003	speed		9	A01	6	Non_targeting_hpRNA_glial_mHTT	4.6059	speed
6	5	Non_targeting_hpRNA_glial_mHTT	8.83237	speed		5	3	siHTT_glial_mHTT	13.3692	speed		1	A02	1	siHTT_glial_mHTT	12.5356	speed
6	6	Non_targeting_hpRNA_glial_mHTT	7.65282	speed		5	4	siHTT_glial_mHTT	11.0697	speed		1	C02	2	siHTT_glial_mHTT	11.4488	speed
6	7	Non_targeting_hpRNA_glial_mHTT	7.90555	speed		5	5	siHTT_glial_mHTT	12.2186	speed		2	A02	1	siHTT_glial_mHTT	12.1656	speed
6	8	Non_targeting_hpRNA_glial_mHTT	8.78279	speed		5	6	siHTT_glial_mHTT	11.1897	speed		2	C02	2	siHTT_glial_mHTT	13.2191	speed
6	9	Non_targeting_hpRNA_glial_mHTT	9.46893	speed		5	7	siHTT_glial_mHTT	10.975	speed		3	A02	1	siHTT_glial_mHTT	13.6606	speed
7	4	Non_targeting_hpRNA_glial_mHTT	5.6189	speed		5	8	siHTT_glial_mHTT	10.364	speed		3	C02	2	siHTT_glial_mHTT	11.9763	speed
7	5	Non_targeting_hpRNA_glial_mHTT	5.35695	speed		5	11	siHTT_glial_mHTT	13.3944	speed		4	A02	1	siHTT_glial_mHTT	13.0399	speed
7	6	Non_targeting_hpRNA_glial_mHTT	6.16701	speed		5	12	siHTT_glial_mHTT	13.7832	speed		4	C02	2	siHTT_glial_mHTT	10.0979	speed
7	7	Non_targeting_hpRNA_glial_mHTT	6.5794	speed		6	2	siHTT_glial_mHTT	11.4127	speed		5	A02	1	siHTT_glial_mHTT	13.4475	speed
7	8	Non_targeting_hpRNA_glial_mHTT	3.15871	speed		6	3	siHTT_glial_mHTT	12.2705	speed		5	C02	2	siHTT_glial_mHTT	11.978	speed
7	9	Non_targeting_hpRNA_glial_mHTT	6.84853	speed		6	4	siHTT_glial_mHTT	10.7582	speed		6	A02	1	siHTT_glial_mHTT	13.5401	speed
8	4	Non_targeting_hpRNA_glial_mHTT	3.70587	speed		6	5	siHTT_glial_mHTT	12.2527	speed		6	C02	2	siHTT_glial_mHTT	11.5133	speed
8	5	Non_targeting_hpRNA_glial_mHTT	5.43729	speed		6	6	siHTT_glial_mHTT	10.2628	speed		7	A02	1	siHTT_glial_mHTT	12.4868	speed
8	6	Non_targeting_hpRNA_glial_mHTT	4.08136	speed		6	7	siHTT_glial_mHTT	10.5368	speed		7	C02	2	siHTT_glial_mHTT	12.7704	speed
8	7	Non_targeting_hpRNA_glial_mHTT	6.7945	speed		6	8	siHTT_glial_mHTT	13.2073	speed		8	A02	1	siHTT_glial_mHTT	11.8278	speed
8	8	Non_targeting_hpRNA_glial_mHTT	5.31661	speed		6	9	siHTT_glial_mHTT	11.307	speed		8	C02	2	siHTT_glial_mHTT	13.1025	speed
8	9	Non_targeting_hpRNA_glial_mHTT	5.52046	speed		6	10	siHTT_glial_mHTT	10.3073	speed		1	A02	2	siHTT_glial_mHTT	10.2567	speed
9	4	Non_targeting_hpRNA_glial_mHTT	4.34657	speed		6	11	siHTT_glial_mHTT	11.7229	speed		1	D09	3	siHTT_glial_mHTT	9.56936	speed
9	5	Non_targeting_hpRNA_glial_mHTT	2.85177	speed		6	12	siHTT_glial_mHTT	12.2721	speed		1	F08	4	siHTT_glial_mHTT	11.8178	speed
9	6	Non_targeting_hpRNA_glial_mHTT	4.6864	speed		7	2	siHTT_glial_mHTT	10.7417	speed		2	A02	2	siHTT_glial_mHTT	12.7563	speed
9	7	Non_targeting_hpRNA_glial_mHTT	4.86627	speed		7	3	siHTT_glial_mHTT	11.3534	speed		2	D09	3	siHTT_glial_mHTT	13.1716	speed
9	8	Non_targeting_hpRNA_glial_mHTT	5.56095	speed		7	4	siHTT_glial_mHTT	9.91126	speed		2	F08	4	siHTT_glial_mHTT	13.6013	speed
9	9	Non_targeting_hpRNA_glial_mHTT	5.22565	speed		7	5	siHTT_glial_mHTT	12.2932	speed		3	A02	2	siHTT_glial_mHTT	14.3955	speed
10	4	Non_targeting_hpRNA_glial_mHTT	5.04009	speed		7	6	siHTT_glial_mHTT	10.9339	speed		3	D09	3	siHTT_glial_mHTT	12.5809	speed
10	5	Non_targeting_hpRNA_glial_mHTT	6.0648	speed		7	7	siHTT_glial_mHTT	10.182	speed		3	F08	4	siHTT_glial_mHTT	13.2191	speed
10	6	Non_targeting_hpRNA_glial_mHTT	5.77228	speed		7	8	siHTT_glial_mHTT	10.3641	speed		4	A02	2	siHTT_glial_mHTT	13.2839	speed
10	7	Non_targeting_hpRNA_glial_mHTT	5.35377	speed		7	9	siHTT_glial_mHTT	9.36013	speed		4	D09	3	siHTT_glial_mHTT	13.8132	speed
10	8	Non_targeting_hpRNA_glial_mHTT	6.00173	speed		7	10	siHTT_glial_mHTT	10.9701	speed		4	F08	4	siHTT_glial_mHTT	12.4869	speed
10	9	Non_targeting_hpRNA_glial_mHTT	5.95935	speed		7	11	siHTT_glial_mHTT	10.8141	speed		5	A02	2	siHTT_glial_mHTT	13.31	speed
2	1	siHTT_glial_mHTT	13.2992	speed		7	12	siHTT_glial_mHTT	10.4026	speed		5	D09	3	siHTT_glial_mHTT	10.8609	speed
2	2	siHTT_glial_mHTT	13.3696	speed		8	2	siHTT_glial_mHTT	9.61868	speed		5	F08	4	siHTT_glial_mHTT	13.15	speed
2	3	siHTT_glial_mHTT	13.4244	speed		8	3	siHTT_glial_mHTT	11.56	speed		6	A02	2	siHTT_glial_mHTT	10.7814	speed
3	1	siHTT_glial_mHTT	12.2189	speed		8	4	siHTT_glial_mHTT	9.62314	speed		6	D09	3	siHTT_glial_mHTT	14.081	speed
3	2	siHTT_glial_mHTT	15.1816	speed		8	5	siHTT_glial_mHTT	12.1422	speed		6	F08	4	siHTT_glial_mHTT	13.5522	speed
3	3	siHTT_glial_mHTT	13.605	speed		8	6	siHTT_glial_mHTT	10.8608	speed		7	A02	2	siHTT_glial_mHTT	12.7851	speed
4	1	siHTT_glial_mHTT	9.0569	speed		8	7	siHTT_glial_mHTT	9.99514	speed		7	D09	3	siHTT_glial_mHTT	12.3284	speed
4	2	siHTT_glial_mHTT	11.138	speed		8	8	siHTT_glial_mHTT	11.568	speed		7	F08	4	siHTT_glial_mHTT	11.6353	speed
4	3	siHTT_glial_mHTT	11.5359	speed		8	9	siHTT_glial_mHTT	11.6967	speed		8	A02	2	siHTT_glial_mHTT	12.551	speed
5	1	siHTT_glial_mHTT	10.8251	speed		8	10	siHTT_glial_mHTT	11.193	speed		8	D09	3	siHTT_glial_mHTT	12.3522	speed
5	2	siHTT_glial_mHTT	12.4236	speed		8	11	siHTT_glial_mHTT	11.4786	speed		8	F08	4	siHTT_glial_mHTT	11.9198	speed
5	3	siHTT_glial_mHTT	11.2458	speed		8	12	siHTT_glial_mHTT	11.8078	speed		9	A02	2	siHTT_glial_mHTT	12.8324	speed
6	1	siHTT_glial_mHTT	11.8401	speed		9	2	siHTT_glial_mHTT	9.83765	speed		9	D09	3	siHTT_glial_mHTT	12.288	speed
6	2	siHTT_glial_mHTT	13.5891	speed		9	3	siHTT_glial_mHTT	11.8075	speed		9	F08	4	siHTT_glial_mHTT	11.3166	speed
6	3	siHTT_glial_mHTT	12.2754	speed		9	4	siHTT_glial_mHTT	9.6659	speed		1	A02	5	siHTT_glial_mHTT	11.3322	speed
7	1	siHTT_glial_mHTT	11.1653	speed		10	5	siHTT_glial_mHTT	11.2256	speed		1	D01	6	siHTT_glial_mHTT	11.6054	speed
7	2	siHTT_glial_mHTT	11.6307	speed		10	6	siHTT_glial_mHTT	9.5912	speed		1	E06	7	siHTT_glial_mHTT	10.7686	speed
7	3	siHTT_glial_mHTT	11.1752	speed		10	7	siHTT_glial_mHTT	8.36443	speed		2	A02	5	siHTT_glial_mHTT	11.9043	speed
8	1	siHTT_glial_mHTT	12.4244	speed		10	8	siHTT_glial_mHTT	9.80208	speed		2	D01	6	siHTT_glial_mHTT	11.5123	speed
8	2	siHTT_glial_mHTT	12.1311	speed		10	11	siHTT_glial_mHTT	9.17704	speed		2	E06	7	siHTT_glial_mHTT	5.13955	speed
8	3	siHTT_glial_mHTT	11.0372	speed		10	12	siHTT_glial_mHTT	11.2724	speed		3	A02	5	siHTT_glial_mHTT	14.1215	speed
9	1	siHTT_glial_mHTT	11.8206	speed		1	1	Non_targeting_hpRNA_glial_mHTT	12.2947	speed		3	D01	6	siHTT_glial_mHTT	14.713	speed
9	2	siHTT_glial_mHTT	10.974	speed		1	2	Non_targeting_hpRNA_glial_mHTT	12.539	speed		3	E06	7	siHTT_glial_mHTT	12.4855	speed
9	3	siHTT_glial_mHTT	11.8046	speed		1	3	Non_targeting_hpRNA_glial_mHTT	11.7268	speed		4	A02	5	siHTT_glial_mHTT	13.1075	speed
10	1	siHTT_glial_mHTT	12.2077	speed		1	4	Non_targeting_hpRNA_glial_mHTT	10.6945	speed		4	D01	6	siHTT_glial_mHTT	12.9115	speed
10	2	siHTT_glial_mHTT	11.9961	speed		1	5	Non_targeting_hpRNA_glial_mHTT	11.3713	speed		4	E06	7	siHTT_glial_mHTT	13.2786	speed
10	3	siHTT_glial_mHTT	11.2358	speed		1	6	Non_targeting_hpRNA_glial_mHTT	11.5927	speed		5	A02	5	siHTT_glial_mHTT	12.6432	speed
2	4	siHTT_glial_mHTT	12.0412	speed		1	7	Non_targeting_hpRNA_glial_mHTT	11.6006	speed		5	D01	6	siHTT_glial_mHTT	10.2839	speed
2	5	siHTT_glial_mHTT	13.1155	speed		1	8	Non_targeting_hpRNA_glial_mHTT	11.0395	speed		5	E06	7	siHTT_glial_mHTT	11.408	speed
2	6	siHTT_glial_mHTT	13.2336	speed		1	9	Non_targeting_hpRNA_glial_mHTT	9.84753	speed		6	A02	5	siHTT_glial_mHTT	13.2561	speed
2	7	siHTT_glial_mHTT	11.8445	speed		1	10	Non_targeting_hpRNA_glial_mHTT	11.0663	speed		6	D01	6	siHTT_glial_mHTT	12.3061	speed
2	8	siHTT_glial_mHTT	12.1505	speed		1	11	Non_targeting_hpRNA_glial_mHTT	12.065	speed		6	E06	7	siHTT_glial_mHTT	11.9249	speed
3	4	siHTT_glial_mHTT	13.8722	speed		2	1	Non_targeting_hpRNA_glial_mHTT	12.8505	speed		7	A02	5	siHTT_glial_mHTT	12.5336	speed
3	5	siHTT_glial_mHTT	13.3553	speed		2	2	Non_targeting_hpRNA_glial_mHTT	10.4477	speed		7	D01	6	siHTT_glial_mHTT	11.9912	speed
3	6	siHTT_glial_mHTT	12.6795	speed		2	3	Non_targeting_hpRNA_glial_mHTT	11.2983	speed		7	E06	7	siHTT_glial_mHTT	11.0928	speed
3	7	siHTT_glial_mHTT	12.2869	speed		2	4	Non_targeting_hpRNA_glial_mHTT	9.70169	speed		8	A02	5	siHTT_glial_mHTT	12.2642	speed
3	8	siHTT_glial_mHTT	12.6874	speed		2	5	Non_targeting_hpRNA_glial_mHTT	10.9079	speed		8	D01	6	siHTT_glial_mHTT	14.0586	speed
4	4	siHTT_glial_mHTT	12.913	speed		2	6	Non_targeting_hpRNA_glial_mHTT	11.4371	speed		8	E06	7	siHTT_glial_mHTT	11.0016	speed
4	5	siHTT_glial_mHTT	12.3921	speed		2	7	Non_targeting_hpRNA_glial_mHTT	11.0233	speed		9	A02	5	siHTT_glial_mHTT	9.9565	speed
4	6	siHTT_glial_mHTT	11.0439	speed		2	8	Non_targeting_hpRNA_glial_mHTT	11.48	speed		9	D01	6	siHTT_glial_mHTT	12.5028	speed
4	7	siHTT_glial_mHTT	10.6887	speed		2	9	Non_targeting_hpRNA_glial_mHTT	10.5753	speed		9	E06	7	siHTT_glial_mHTT	9.82817	speed
4	8	siHTT_glial_mHTT	11.7876	speed		2	10	Non_targeting_hpRNA_glial_mHTT	10.6327	speed		1	A07	1	60791 glial_mHTT	12.0332	speed
5	4	siHTT_glial_mHTT	11.9177	speed		2	11	Non_targeting_hpRNA_glial_mHTT	11.1785	speed		1	B07	2	60791 glial_mHTT	11.5139	speed
5	5	siHTT_glial_mHTT	12.4605	speed		3	1	Non_targeting_hpRNA_glial_mHTT	10.1471	speed		1	F07	3	60791 glial_mHTT	10.4661	speed
5	6	siHTT_glial_mHTT	11.0883	speed		3	2	Non_targeting_hpRNA_glial_mHTT	9.57934	speed		1	H01	4	60791 glial_mHTT	11.9822	speed
5	7	siHTT_glial_mHTT	11.2689	speed		3	3	Non_targeting_hpRNA_glial_mHTT	10.3119	speed		2	A07	1	60791 glial_mHTT	8.34572	speed
5	8	siHTT_glial_mHTT	11.3274	speed		3	4	Non_targeting_hpRNA_glial_mHTT	7.83033	speed		2	B07	2	60791 glial_mHTT	7.89928	speed
6	4	siHTT_glial_mHTT	11.056	speed		3	5	Non_targeting_hpRNA_glial_mHTT	10.3054	speed		2	F07	3	60791 glial_mHTT	6.28791	speed
6	5	siHTT_glial_mHTT	11.9035	speed		3	6	Non_targeting_hpRNA_glial_mHTT	9.45921	speed		2	H01	4	60791 glial_mHTT	7.53595	speed
6	6	siHTT_glial_mHTT	10.2836	speed		3	7	Non_targeting_hpRNA_glial_mHTT	9.7389	speed		3	A07	1	60791 glial_mHTT	14.8578	speed
6	7	siHTT_glial_mHTT	11.5262	speed		3	8	Non_targeting_hpRNA_glial_mHTT	10.9143	speed		3	B07	2	60791 glial_mHTT	14.7053	speed
6	8	siHTT_glial_mHTT	13.6128	speed		3	9	Non_targeting_hpRNA_glial_mHTT	9.63692	speed		3	F07	3	60791 glial_mHTT	12.8585	speed
7	4	siHTT_glial_mHTT	10.765	speed		3	10	Non_targeting_hpRNA_glial_mHTT	10.2763	speed		3	H01	4	60791 glial_mHTT	14.4663	speed
7	5	siHTT_glial_mHTT	11.6304	speed		3	11	Non_targeting_hpRNA_glial_mHTT	11.1384	speed		4	A07	1	60791 glial_mHTT	14.5688	speed
7	6	siHTT_glial_mHTT	8.73746	speed		3	12	Non_targeting_hpRNA_glial_mHTT	10.5967	speed		4	B07	2	60791 glial_mHTT	13.5915	speed
7	7	siHTT_glial_mHTT	10.5596	speed		4	1	Non_targeting_hpRNA_glial_mHTT	8.7975	speed		4	F07	3	60791 glial_mHTT	12.7795	speed
7	8	siHTT_glial_mHTT	9.94202	speed		4	2	Non_targeting_hpRNA_glial_mHTT	7.88503	speed		4	H01	4	60791 glial_mHTT	12.0941	speed
8	4	siHTT_glial_mHTT	11.6355	speed		4	3	Non_targeting_hpRNA_glial_mHTT	9.14295	speed		5	A07	1	60791 glial_mHTT	13.5379	speed
8	5	siHTT_glial_mHTT	12.9402	speed		4	4	Non_targeting_hpRNA_glial_mHTT	7.53403	speed		5	B07	2	60791 glial_mHTT	11.5	speed
8	6	siHTT_glial_mHTT	10.6889	speed		4	5	Non_targeting_hpRNA_glial_mHTT	9.77786	speed		5	F07	3	60791 glial_mHTT	11.4584	speed
8	7	siHTT_glial_mHTT	9.80732	speed		4	6	Non_targeting_hpRNA_glial_mHTT	8.46567	speed		5	H01	4	60791 glial_mHTT	10.5297	speed
8	8	siHTT_glial_mHTT	11.5471	speed		4	7	Non_targeting_hpRNA_glial_mHTT	8.59036	speed		6	A07	1	60791 glial_mHTT	13.997	speed
9	4	siHTT_glial_mHTT	11.4795	speed		4	8	Non_targeting_hpRNA_glial_mHTT	8.81224	speed		6	B07	2	60791 glial_mHTT	11.9817	speed
9	5	siHTT_glial_mHTT	12.4085	speed		4	9	Non_targeting_hpRNA_glial_mHTT	9.16995	speed		6	F07	3	60791 glial_mHTT	10.3681	speed
9	6	siHTT_glial_mHTT	9.7591	speed		4	10	Non_targeting_hpRNA_glial_mHTT	8.55572	speed		6	H01	4	60791 glial_mHTT	10.0243	speed
9	7	siHTT_glial_mHTT	10.2836	speed		4	11	Non_targeting_hpRNA_glial_mHTT	9.70856	speed		7	A07	1	60791 glial_mHTT	9.37948	speed
9	8	siHTT_glial_mHTT	11.8668	speed		4	12	Non_targeting_hpRNA_glial_mHTT	6.41592	speed		7	B07	2	60791 glial_mHTT	7.72481	speed
10	4	siHTT_glial_mHTT	13.3354	speed		5	1	Non_targeting_hpRNA_glial_mHTT	10.7769	speed		7	F07	3	60791 glial_mHTT	9.81835	speed
10	5	siHTT_glial_mHTT	9.84851	speed		5	2	Non_targeting_hpRNA_glial_mHTT	6.68884	speed		7	H01	4	60791 glial_mHTT	4.06992	speed
10	6	siHTT_glial_mHTT	12.4092	speed		5	3	Non_targeting_hpRNA_glial_mHTT	9.04822	speed		8	A07	1	60791 glial_mHTT	11.8307	speed
10	7	siHTT_glial_mHTT	11.8995	speed		5	4	Non_targeting_hpRNA_glial_mHTT	7.73946	speed		8	B07	2	60791 glial_mHTT	7.22437	speed
10	8	siHTT_glial_mHTT	13.2458	speed		5	5	Non_targeting_hpRNA_glial_mHTT	7.68996	speed		8	F07	3	60791 glial_mHTT	10.545	speed
2	1	23394 glial_mHTT	12.2712	speed		5	6	Non_targeting_hpRNA_glial_mHTT	7.4998	speed		8	H01	4	60791 glial_mHTT	8.30977	speed
2	2	23394 glial_mHTT	5.85168	speed		5	7	Non_targeting_hpRNA_glial_mHTT	7.8901	speed		9	A07	1	60791 glial_mHTT	11.1612	speed
2	3	23394 glial_mHTT	12.3833	speed		5	10	Non_targeting_hpRNA_glial_mHTT	5.2858	speed		9	B07	2	60791 glial_mHTT	8.40772	speed
2	4	23394 glial_mHTT	13.654	speed		5	11	Non_targeting_hpRNA_glial_mHTT	9.40396	speed		9	F07	3	60791 glial_mHTT	9.30514	speed
2	5	23394 glial_mHTT	12.9077	speed		5	12	Non_targeting_hpRNA_glial_mHTT	10.1336	speed		9	H01	4	60791 glial_mHTT	7.25726	speed
3	1	23394 glial_mHTT	12.7249	speed		6	1	Non_targeting_hpRNA_glial_mHTT	7.9839	speed
3	2	23394 glial_mHTT	12.9679	speed		6	2	Non_targeting_hpRNA_glial_mHTT	6.53294	speed
3	3	23394 glial_mHTT	13.9165	speed		6	3	Non_targeting_hpRNA_glial_mHTT	8.33055	speed
3	4	23394 glial_mHTT	13.5728	speed		6	4	Non_targeting_hpRNA_glial_mHTT	6.36594	speed
3	5	23394 glial_mHTT	13.4203	speed		6	5	Non_targeting_hpRNA_glial_mHTT	5.71189	speed
4	1	23394 glial_mHTT	12.0878	speed		6	6	Non_targeting_hpRNA_glial_mHTT	7.22377	speed
4	2	23394 glial_mHTT	12.8359	speed		6	7	Non_targeting_hpRNA_glial_mHTT	6.99758	speed
4	3	23394 glial_mHTT	12.3851	speed		6	8	Non_targeting_hpRNA_glial_mHTT	8.76409	speed
4	4	23394 glial_mHTT	10.9799	speed		6	9	Non_targeting_hpRNA_glial_mHTT	7.15761	speed
4	5	23394 glial_mHTT	11.5774	speed		6	10	Non_targeting_hpRNA_glial_mHTT	5.57106	speed
5	1	23394 glial_mHTT	11.6038	speed		6	11	Non_targeting_hpRNA_glial_mHTT	8.34557	speed
5	2	23394 glial_mHTT	8.48506	speed		6	12	Non_targeting_hpRNA_glial_mHTT	7.48858	speed
5	3	23394 glial_mHTT	10.0756	speed		7	1	Non_targeting_hpRNA_glial_mHTT	5.15296	speed
5	4	23394 glial_mHTT	10.5911	speed		7	2	Non_targeting_hpRNA_glial_mHTT	5.49355	speed
5	5	23394 glial_mHTT	10.2713	speed		7	3	Non_targeting_hpRNA_glial_mHTT	7.10943	speed
6	1	23394 glial_mHTT	7.70892	speed		7	4	Non_targeting_hpRNA_glial_mHTT	5.08651	speed
6	2	23394 glial_mHTT	9.39825	speed		7	5	Non_targeting_hpRNA_glial_mHTT	8.03852	speed
6	3	23394 glial_mHTT	13.1116	speed		7	6	Non_targeting_hpRNA_glial_mHTT	6.71318	speed
6	4	23394 glial_mHTT	8.23616	speed		7	7	Non_targeting_hpRNA_glial_mHTT	5.39868	speed
6	5	23394 glial_mHTT	9.63025	speed		7	8	Non_targeting_hpRNA_glial_mHTT	4.13079	speed
7	1	23394 glial_mHTT	7.89413	speed		7	9	Non_targeting_hpRNA_glial_mHTT	3.83695	speed
7	2	23394 glial_mHTT	6.50012	speed		7	10	Non_targeting_hpRNA_glial_mHTT	6.06921	speed
7	3	23394 glial_mHTT	8.35367	speed		7	11	Non_targeting_hpRNA_glial_mHTT	7.01544	speed
7	4	23394 glial_mHTT	7.37917	speed		7	12	Non_targeting_hpRNA_glial_mHTT	6.54443	speed
7	5	23394 glial_mHTT	8.29741	speed		8	1	Non_targeting_hpRNA_glial_mHTT	5.22323	speed
8	1	23394 glial_mHTT	4.68256	speed		8	2	Non_targeting_hpRNA_glial_mHTT	3.29092	speed
8	2	23394 glial_mHTT	6.54139	speed		8	3	Non_targeting_hpRNA_glial_mHTT	5.70368	speed
8	3	23394 glial_mHTT	8.38154	speed		8	4	Non_targeting_hpRNA_glial_mHTT	5.34644	speed
8	4	23394 glial_mHTT	5.46312	speed		8	5	Non_targeting_hpRNA_glial_mHTT	6.39656	speed
8	5	23394 glial_mHTT	6.40803	speed		8	6	Non_targeting_hpRNA_glial_mHTT	5.25645	speed
9	1	23394 glial_mHTT	5.93621	speed		8	7	Non_targeting_hpRNA_glial_mHTT	5.47871	speed
9	2	23394 glial_mHTT	5.11512	speed		8	8	Non_targeting_hpRNA_glial_mHTT	4.48981	speed
9	3	23394 glial_mHTT	7.86238	speed		8	9	Non_targeting_hpRNA_glial_mHTT	4.60025	speed
9	4	23394 glial_mHTT	4.72635	speed		8	10	Non_targeting_hpRNA_glial_mHTT	4.43493	speed
9	5	23394 glial_mHTT	5.61833	speed		8	11	Non_targeting_hpRNA_glial_mHTT	6.15956	speed
10	1	23394 glial_mHTT	7.1376	speed		8	12	Non_targeting_hpRNA_glial_mHTT	5.21209	speed
10	2	23394 glial_mHTT	5.01085	speed		9	1	Non_targeting_hpRNA_glial_mHTT	3.84217	speed
10	3	23394 glial_mHTT	5.20625	speed		9	2	Non_targeting_hpRNA_glial_mHTT	3.05963	speed
10	4	23394 glial_mHTT	6.27993	speed		9	3	Non_targeting_hpRNA_glial_mHTT	5.53149	speed
10	5	23394 glial_mHTT	7.64468	speed		9	4	Non_targeting_hpRNA_glial_mHTT	5.33735	speed
						10	5	Non_targeting_hpRNA_glial_mHTT	2.05354	speed
						10	6	Non_targeting_hpRNA_glial_mHTT	3.24662	speed
						10	7	Non_targeting_hpRNA_glial_mHTT	4.79695	speed
						10	8	Non_targeting_hpRNA_glial_mHTT	3.17863	speed
						10	9	Non_targeting_hpRNA_glial_mHTT	4.60528	speed
						10	12	Non_targeting_hpRNA_glial_mHTT	3.62806	speed
						1	1	24988_glial_mHTT	10.8025	speed
						1	2	24988_glial_mHTT	12.2568	speed
						1	3	24988_glial_mHTT	11.2914	speed
						1	4	24988_glial_mHTT	12.0945	speed
						1	5	24988_glial_mHTT	12.4051	speed
						1	6	24988_glial_mHTT	10.965	speed
						2	1	24988_glial_mHTT	11.7978	speed
						2	2	24988_glial_mHTT	11.9369	speed
						2	3	24988_glial_mHTT	11.3256	speed
						2	4	24988_glial_mHTT	12.4752	speed
						2	5	24988_glial_mHTT	11.3051	speed
						2	6	24988_glial_mHTT	11.8028	speed
						3	1	24988_glial_mHTT	11.8318	speed
						3	2	24988_glial_mHTT	12.0956	speed
						3	3	24988_glial_mHTT	12.3872	speed
						3	4	24988_glial_mHTT	13.1881	speed
						3	5	24988_glial_mHTT	13.207	speed
						3	6	24988_glial_mHTT	12.1546	speed
						4	1	24988_glial_mHTT	10.6264	speed
						4	2	24988_glial_mHTT	10.7941	speed
						4	3	24988_glial_mHTT	9.96226	speed
						4	4	24988_glial_mHTT	11.568	speed
						4	5	24988_glial_mHTT	11.0026	speed
						4	6	24988_glial_mHTT	11.4614	speed
						5	1	24988_glial_mHTT	9.06714	speed
						5	2	24988_glial_mHTT	8.51621	speed
						5	3	24988_glial_mHTT	8.50954	speed
						5	4	24988_glial_mHTT	10.0171	speed
						5	5	24988_glial_mHTT	10.4162	speed
						5	6	24988_glial_mHTT	9.21474	speed
						6	1	24988_glial_mHTT	7.91722	speed
						6	2	24988_glial_mHTT	7.38992	speed
						6	3	24988_glial_mHTT	6.30505	speed
						6	4	24988_glial_mHTT	7.67019	speed
						6	5	24988_glial_mHTT	6.78483	speed
						6	6	24988_glial_mHTT	7.37553	speed
						7	1	24988_glial_mHTT	6.54745	speed
						7	2	24988_glial_mHTT	6.74044	speed
						7	3	24988_glial_mHTT		speed
						7	4	24988_glial_mHTT	6.74197	speed
						7	5	24988_glial_mHTT	5.3672	speed
						7	6	24988_glial_mHTT	6.11331	speed
						8	1	24988_glial_mHTT	5.15464	speed
						8	2	24988_glial_mHTT	5.44547	speed
						8	3	24988_glial_mHTT		speed
						8	4	24988_glial_mHTT	4.59624	speed
						8	5	24988_glial_mHTT	4.37949	speed
						8	6	24988_glial_mHTT	5.24613	speed
						10	1	24988_glial_mHTT	1.51826	speed
						10	2	24988_glial_mHTT	2.47747	speed
						10	3	24988_glial_mHTT		speed
						10	4	24988_glial_mHTT	1.99525	speed
						10	5	24988_glial_mHTT	3.3083	speed
						10	6	24988_glial_mHTT	3.60191	speed

## Sheet: SYT13
sytbeta BDSC 27293						sytbeta BDSC 40764
Trialday	Replicate	Genotype	Observation	Metric		Trialday	Replicate	Genotype	Observation	Metric
2	1	Non_targeting_hpRNA_glial_mHTT	14.2278	speed		1	1	Non_targeting_hpRNA_glial_mHTT	12.186	speed
2	2	Non_targeting_hpRNA_glial_mHTT	15.5571	speed		1	2	Non_targeting_hpRNA_glial_mHTT	12.7909	speed
2	3	Non_targeting_hpRNA_glial_mHTT	14.5411	speed		2	1	Non_targeting_hpRNA_glial_mHTT	11.6151	speed
3	1	Non_targeting_hpRNA_glial_mHTT	12.1723	speed		2	2	Non_targeting_hpRNA_glial_mHTT	12.1219	speed
3	2	Non_targeting_hpRNA_glial_mHTT	12.2934	speed		3	1	Non_targeting_hpRNA_glial_mHTT	9.94744	speed
3	3	Non_targeting_hpRNA_glial_mHTT	9.53973	speed		3	2	Non_targeting_hpRNA_glial_mHTT	11.7971	speed
4	1	Non_targeting_hpRNA_glial_mHTT	8.78102	speed		4	1	Non_targeting_hpRNA_glial_mHTT	9.85299	speed
4	2	Non_targeting_hpRNA_glial_mHTT	10.7369	speed		4	2	Non_targeting_hpRNA_glial_mHTT	10.6864	speed
4	3	Non_targeting_hpRNA_glial_mHTT	9.95084	speed		5	1	Non_targeting_hpRNA_glial_mHTT	5.32302	speed
5	1	Non_targeting_hpRNA_glial_mHTT	5.73557	speed		5	2	Non_targeting_hpRNA_glial_mHTT	10.4062	speed
5	2	Non_targeting_hpRNA_glial_mHTT	9.92094	speed		6	1	Non_targeting_hpRNA_glial_mHTT	1.35658	speed
5	3	Non_targeting_hpRNA_glial_mHTT	10.0181	speed		6	2	Non_targeting_hpRNA_glial_mHTT	6.91932	speed
6	1	Non_targeting_hpRNA_glial_mHTT	4.91453	speed		7	1	Non_targeting_hpRNA_glial_mHTT	8.64577	speed
6	2	Non_targeting_hpRNA_glial_mHTT	9.42369	speed		7	2	Non_targeting_hpRNA_glial_mHTT	8.6402	speed
6	3	Non_targeting_hpRNA_glial_mHTT	9.29628	speed		8	1	Non_targeting_hpRNA_glial_mHTT	5.00066	speed
7	1	Non_targeting_hpRNA_glial_mHTT	4.65538	speed		8	2	Non_targeting_hpRNA_glial_mHTT	6.39159	speed
7	2	Non_targeting_hpRNA_glial_mHTT	4.87125	speed		1	3	Non_targeting_hpRNA_glial_mHTT	11.5646	speed
7	3	Non_targeting_hpRNA_glial_mHTT	8.14019	speed		1	4	Non_targeting_hpRNA_glial_mHTT	10.6456	speed
8	1	Non_targeting_hpRNA_glial_mHTT	3.44567	speed		1	5	Non_targeting_hpRNA_glial_mHTT	8.89028	speed
8	2	Non_targeting_hpRNA_glial_mHTT	5.02795	speed		2	3	Non_targeting_hpRNA_glial_mHTT	9.55612	speed
8	3	Non_targeting_hpRNA_glial_mHTT	4.10722	speed		2	4	Non_targeting_hpRNA_glial_mHTT	12.9619	speed
9	1	Non_targeting_hpRNA_glial_mHTT	6.6524	speed		2	5	Non_targeting_hpRNA_glial_mHTT	12.984	speed
9	2	Non_targeting_hpRNA_glial_mHTT	7.84532	speed		3	3	Non_targeting_hpRNA_glial_mHTT	9.64493	speed
9	3	Non_targeting_hpRNA_glial_mHTT	7.73044	speed		3	4	Non_targeting_hpRNA_glial_mHTT	12.1723	speed
10	1	Non_targeting_hpRNA_glial_mHTT	3.7822	speed		3	5	Non_targeting_hpRNA_glial_mHTT	10.8503	speed
10	2	Non_targeting_hpRNA_glial_mHTT	3.05975	speed		4	3	Non_targeting_hpRNA_glial_mHTT	7.78815	speed
10	3	Non_targeting_hpRNA_glial_mHTT	6.99881	speed		4	4	Non_targeting_hpRNA_glial_mHTT	6.44811	speed
2	4	Non_targeting_hpRNA_glial_mHTT	11.6946	speed		4	5	Non_targeting_hpRNA_glial_mHTT	10.727	speed
2	5	Non_targeting_hpRNA_glial_mHTT	12.322	speed		5	3	Non_targeting_hpRNA_glial_mHTT	7.63764	speed
2	6	Non_targeting_hpRNA_glial_mHTT	11.7243	speed		5	4	Non_targeting_hpRNA_glial_mHTT	9.00362	speed
2	7	Non_targeting_hpRNA_glial_mHTT	11.9576	speed		5	5	Non_targeting_hpRNA_glial_mHTT	6.61344	speed
2	8	Non_targeting_hpRNA_glial_mHTT	10.4241	speed		6	3	Non_targeting_hpRNA_glial_mHTT	7.03368	speed
2	9	Non_targeting_hpRNA_glial_mHTT	11.88	speed		6	4	Non_targeting_hpRNA_glial_mHTT	8.17837	speed
3	4	Non_targeting_hpRNA_glial_mHTT	11.9101	speed		6	5	Non_targeting_hpRNA_glial_mHTT	4.80799	speed
3	5	Non_targeting_hpRNA_glial_mHTT	12.1479	speed		7	3	Non_targeting_hpRNA_glial_mHTT	3.50538	speed
3	6	Non_targeting_hpRNA_glial_mHTT	12.3648	speed		7	4	Non_targeting_hpRNA_glial_mHTT	5.17438	speed
3	7	Non_targeting_hpRNA_glial_mHTT	13.3803	speed		7	5	Non_targeting_hpRNA_glial_mHTT	1.83189	speed
3	8	Non_targeting_hpRNA_glial_mHTT	10.8529	speed		8	3	Non_targeting_hpRNA_glial_mHTT	5.40236	speed
3	9	Non_targeting_hpRNA_glial_mHTT	11.6781	speed		8	4	Non_targeting_hpRNA_glial_mHTT	4.93599	speed
4	4	Non_targeting_hpRNA_glial_mHTT	8.41563	speed		8	5	Non_targeting_hpRNA_glial_mHTT	5.66823	speed
4	5	Non_targeting_hpRNA_glial_mHTT	11.4763	speed		9	3	Non_targeting_hpRNA_glial_mHTT	2.16147	speed
4	6	Non_targeting_hpRNA_glial_mHTT	10.7076	speed		9	4	Non_targeting_hpRNA_glial_mHTT	2.57011	speed
4	7	Non_targeting_hpRNA_glial_mHTT	10.2271	speed		9	5	Non_targeting_hpRNA_glial_mHTT	1.9203	speed
4	8	Non_targeting_hpRNA_glial_mHTT	10.6616	speed		1	6	Non_targeting_hpRNA_glial_mHTT	10.9354	speed
4	9	Non_targeting_hpRNA_glial_mHTT	10.7341	speed		2	6	Non_targeting_hpRNA_glial_mHTT	11.6443	speed
5	4	Non_targeting_hpRNA_glial_mHTT	7.73139	speed		3	6	Non_targeting_hpRNA_glial_mHTT	13.4473	speed
5	5	Non_targeting_hpRNA_glial_mHTT	8.67637	speed		4	6	Non_targeting_hpRNA_glial_mHTT	9.2254	speed
5	6	Non_targeting_hpRNA_glial_mHTT	8.29841	speed		5	6	Non_targeting_hpRNA_glial_mHTT	11.5363	speed
5	7	Non_targeting_hpRNA_glial_mHTT	5.94291	speed		6	6	Non_targeting_hpRNA_glial_mHTT	4.02543	speed
5	8	Non_targeting_hpRNA_glial_mHTT	7.57793	speed		7	6	Non_targeting_hpRNA_glial_mHTT	2.12227	speed
5	9	Non_targeting_hpRNA_glial_mHTT	9.04111	speed		8	6	Non_targeting_hpRNA_glial_mHTT	4.74043	speed
6	4	Non_targeting_hpRNA_glial_mHTT	7.13998	speed		9	6	Non_targeting_hpRNA_glial_mHTT	4.6059	speed
6	5	Non_targeting_hpRNA_glial_mHTT	8.83237	speed		1	1	siHTT_glial_mHTT	12.5356	speed
6	6	Non_targeting_hpRNA_glial_mHTT	7.65282	speed		1	2	siHTT_glial_mHTT	11.4488	speed
6	7	Non_targeting_hpRNA_glial_mHTT	7.90555	speed		2	1	siHTT_glial_mHTT	12.1656	speed
6	8	Non_targeting_hpRNA_glial_mHTT	8.78279	speed		2	2	siHTT_glial_mHTT	13.2191	speed
6	9	Non_targeting_hpRNA_glial_mHTT	9.46893	speed		3	1	siHTT_glial_mHTT	13.6606	speed
7	4	Non_targeting_hpRNA_glial_mHTT	5.6189	speed		3	2	siHTT_glial_mHTT	11.9763	speed
7	5	Non_targeting_hpRNA_glial_mHTT	5.35695	speed		4	1	siHTT_glial_mHTT	13.0399	speed
7	6	Non_targeting_hpRNA_glial_mHTT	6.16701	speed		4	2	siHTT_glial_mHTT	10.0979	speed
7	7	Non_targeting_hpRNA_glial_mHTT	6.5794	speed		5	1	siHTT_glial_mHTT	13.4475	speed
7	8	Non_targeting_hpRNA_glial_mHTT	3.15871	speed		5	2	siHTT_glial_mHTT	11.978	speed
7	9	Non_targeting_hpRNA_glial_mHTT	6.84853	speed		6	1	siHTT_glial_mHTT	13.5401	speed
8	4	Non_targeting_hpRNA_glial_mHTT	3.70587	speed		6	2	siHTT_glial_mHTT	11.5133	speed
8	5	Non_targeting_hpRNA_glial_mHTT	5.43729	speed		7	1	siHTT_glial_mHTT	12.4868	speed
8	6	Non_targeting_hpRNA_glial_mHTT	4.08136	speed		7	2	siHTT_glial_mHTT	12.7704	speed
8	7	Non_targeting_hpRNA_glial_mHTT	6.7945	speed		8	1	siHTT_glial_mHTT	11.8278	speed
8	8	Non_targeting_hpRNA_glial_mHTT	5.31661	speed		8	2	siHTT_glial_mHTT	13.1025	speed
8	9	Non_targeting_hpRNA_glial_mHTT	5.52046	speed		1	2	siHTT_glial_mHTT	10.2567	speed
9	4	Non_targeting_hpRNA_glial_mHTT	4.34657	speed		1	3	siHTT_glial_mHTT	9.56936	speed
9	5	Non_targeting_hpRNA_glial_mHTT	2.85177	speed		1	4	siHTT_glial_mHTT	11.8178	speed
9	6	Non_targeting_hpRNA_glial_mHTT	4.6864	speed		2	2	siHTT_glial_mHTT	12.7563	speed
9	7	Non_targeting_hpRNA_glial_mHTT	4.86627	speed		2	3	siHTT_glial_mHTT	13.1716	speed
9	8	Non_targeting_hpRNA_glial_mHTT	5.56095	speed		2	4	siHTT_glial_mHTT	13.6013	speed
9	9	Non_targeting_hpRNA_glial_mHTT	5.22565	speed		3	2	siHTT_glial_mHTT	14.3955	speed
10	4	Non_targeting_hpRNA_glial_mHTT	5.04009	speed		3	3	siHTT_glial_mHTT	12.5809	speed
10	5	Non_targeting_hpRNA_glial_mHTT	6.0648	speed		3	4	siHTT_glial_mHTT	13.2191	speed
10	6	Non_targeting_hpRNA_glial_mHTT	5.77228	speed		4	2	siHTT_glial_mHTT	13.2839	speed
10	7	Non_targeting_hpRNA_glial_mHTT	5.35377	speed		4	3	siHTT_glial_mHTT	13.8132	speed
10	8	Non_targeting_hpRNA_glial_mHTT	6.00173	speed		4	4	siHTT_glial_mHTT	12.4869	speed
10	9	Non_targeting_hpRNA_glial_mHTT	5.95935	speed		5	2	siHTT_glial_mHTT	13.31	speed
2	1	siHTT_glial_mHTT	13.2992	speed		5	3	siHTT_glial_mHTT	10.8609	speed
2	2	siHTT_glial_mHTT	13.3696	speed		5	4	siHTT_glial_mHTT	13.15	speed
2	3	siHTT_glial_mHTT	13.4244	speed		6	2	siHTT_glial_mHTT	10.7814	speed
3	1	siHTT_glial_mHTT	12.2189	speed		6	3	siHTT_glial_mHTT	14.081	speed
3	2	siHTT_glial_mHTT	15.1816	speed		6	4	siHTT_glial_mHTT	13.5522	speed
3	3	siHTT_glial_mHTT	13.605	speed		7	2	siHTT_glial_mHTT	12.7851	speed
4	1	siHTT_glial_mHTT	9.0569	speed		7	3	siHTT_glial_mHTT	12.3284	speed
4	2	siHTT_glial_mHTT	11.138	speed		7	4	siHTT_glial_mHTT	11.6353	speed
4	3	siHTT_glial_mHTT	11.5359	speed		8	2	siHTT_glial_mHTT	12.551	speed
5	1	siHTT_glial_mHTT	10.8251	speed		8	3	siHTT_glial_mHTT	12.3522	speed
5	2	siHTT_glial_mHTT	12.4236	speed		8	4	siHTT_glial_mHTT	11.9198	speed
5	3	siHTT_glial_mHTT	11.2458	speed		9	2	siHTT_glial_mHTT	12.8324	speed
6	1	siHTT_glial_mHTT	11.8401	speed		9	3	siHTT_glial_mHTT	12.288	speed
6	2	siHTT_glial_mHTT	13.5891	speed		9	4	siHTT_glial_mHTT	11.3166	speed
6	3	siHTT_glial_mHTT	12.2754	speed		1	5	siHTT_glial_mHTT	11.3322	speed
7	1	siHTT_glial_mHTT	11.1653	speed		1	6	siHTT_glial_mHTT	11.6054	speed
7	2	siHTT_glial_mHTT	11.6307	speed		1	7	siHTT_glial_mHTT	10.7686	speed
7	3	siHTT_glial_mHTT	11.1752	speed		2	5	siHTT_glial_mHTT	11.9043	speed
8	1	siHTT_glial_mHTT	12.4244	speed		2	6	siHTT_glial_mHTT	11.5123	speed
8	2	siHTT_glial_mHTT	12.1311	speed		2	7	siHTT_glial_mHTT	5.13955	speed
8	3	siHTT_glial_mHTT	11.0372	speed		3	5	siHTT_glial_mHTT	14.1215	speed
9	1	siHTT_glial_mHTT	11.8206	speed		3	6	siHTT_glial_mHTT	14.713	speed
9	2	siHTT_glial_mHTT	10.974	speed		3	7	siHTT_glial_mHTT	12.4855	speed
9	3	siHTT_glial_mHTT	11.8046	speed		4	5	siHTT_glial_mHTT	13.1075	speed
10	1	siHTT_glial_mHTT	12.2077	speed		4	6	siHTT_glial_mHTT	12.9115	speed
10	2	siHTT_glial_mHTT	11.9961	speed		4	7	siHTT_glial_mHTT	13.2786	speed
10	3	siHTT_glial_mHTT	11.2358	speed		5	5	siHTT_glial_mHTT	12.6432	speed
2	4	siHTT_glial_mHTT	12.0412	speed		5	6	siHTT_glial_mHTT	10.2839	speed
2	5	siHTT_glial_mHTT	13.1155	speed		5	7	siHTT_glial_mHTT	11.408	speed
2	6	siHTT_glial_mHTT	13.2336	speed		6	5	siHTT_glial_mHTT	13.2561	speed
2	7	siHTT_glial_mHTT	11.8445	speed		6	6	siHTT_glial_mHTT	12.3061	speed
2	8	siHTT_glial_mHTT	12.1505	speed		6	7	siHTT_glial_mHTT	11.9249	speed
3	4	siHTT_glial_mHTT	13.8722	speed		7	5	siHTT_glial_mHTT	12.5336	speed
3	5	siHTT_glial_mHTT	13.3553	speed		7	6	siHTT_glial_mHTT	11.9912	speed
3	6	siHTT_glial_mHTT	12.6795	speed		7	7	siHTT_glial_mHTT	11.0928	speed
3	7	siHTT_glial_mHTT	12.2869	speed		8	5	siHTT_glial_mHTT	12.2642	speed
3	8	siHTT_glial_mHTT	12.6874	speed		8	6	siHTT_glial_mHTT	14.0586	speed
4	4	siHTT_glial_mHTT	12.913	speed		8	7	siHTT_glial_mHTT	11.0016	speed
4	5	siHTT_glial_mHTT	12.3921	speed		9	5	siHTT_glial_mHTT	9.9565	speed
4	6	siHTT_glial_mHTT	11.0439	speed		9	6	siHTT_glial_mHTT	12.5028	speed
4	7	siHTT_glial_mHTT	10.6887	speed		9	7	siHTT_glial_mHTT	9.82817	speed
4	8	siHTT_glial_mHTT	11.7876	speed		1	1	40764 glial_mHTT	11.6689	speed
5	4	siHTT_glial_mHTT	11.9177	speed		1	2	40764 glial_mHTT	11.8853	speed
5	5	siHTT_glial_mHTT	12.4605	speed		1	3	40764 glial_mHTT	9.84224	speed
5	6	siHTT_glial_mHTT	11.0883	speed		1	4	40764 glial_mHTT	12.0017	speed
5	7	siHTT_glial_mHTT	11.2689	speed		1	5	40764 glial_mHTT	11.6347	speed
5	8	siHTT_glial_mHTT	11.3274	speed		2	1	40764 glial_mHTT	14.8825	speed
6	4	siHTT_glial_mHTT	11.056	speed		2	2	40764 glial_mHTT	13.1868	speed
6	5	siHTT_glial_mHTT	11.9035	speed		2	3	40764 glial_mHTT	13.7936	speed
6	6	siHTT_glial_mHTT	10.2836	speed		2	4	40764 glial_mHTT	14.0251	speed
6	7	siHTT_glial_mHTT	11.5262	speed		2	5	40764 glial_mHTT	14.0373	speed
6	8	siHTT_glial_mHTT	13.6128	speed		3	1	40764 glial_mHTT	13.6326	speed
7	4	siHTT_glial_mHTT	10.765	speed		3	2	40764 glial_mHTT	14.2299	speed
7	5	siHTT_glial_mHTT	11.6304	speed		3	3	40764 glial_mHTT	13.1751	speed
7	6	siHTT_glial_mHTT	8.73746	speed		3	4	40764 glial_mHTT	13.0201	speed
7	7	siHTT_glial_mHTT	10.5596	speed		3	5	40764 glial_mHTT	12.794	speed
7	8	siHTT_glial_mHTT	9.94202	speed		4	1	40764 glial_mHTT	13.4275	speed
8	4	siHTT_glial_mHTT	11.6355	speed		4	2	40764 glial_mHTT	14.6652	speed
8	5	siHTT_glial_mHTT	12.9402	speed		4	3	40764 glial_mHTT	12.8701	speed
8	6	siHTT_glial_mHTT	10.6889	speed		4	4	40764 glial_mHTT	14.2695	speed
8	7	siHTT_glial_mHTT	9.80732	speed		4	5	40764 glial_mHTT	13.5996	speed
8	8	siHTT_glial_mHTT	11.5471	speed		5	1	40764 glial_mHTT	12.2741	speed
9	4	siHTT_glial_mHTT	11.4795	speed		5	2	40764 glial_mHTT	12.7628	speed
9	5	siHTT_glial_mHTT	12.4085	speed		5	3	40764 glial_mHTT	11.0315	speed
9	6	siHTT_glial_mHTT	9.7591	speed		5	4	40764 glial_mHTT	12.0231	speed
9	7	siHTT_glial_mHTT	10.2836	speed		5	5	40764 glial_mHTT	10.2473	speed
9	8	siHTT_glial_mHTT	11.8668	speed		6	1	40764 glial_mHTT	15.167	speed
10	4	siHTT_glial_mHTT	13.3354	speed		6	2	40764 glial_mHTT	12.758	speed
10	5	siHTT_glial_mHTT	9.84851	speed		6	3	40764 glial_mHTT	14.6086	speed
10	6	siHTT_glial_mHTT	12.4092	speed		6	4	40764 glial_mHTT	13.3185	speed
10	7	siHTT_glial_mHTT	11.8995	speed		6	5	40764 glial_mHTT	13.3133	speed
10	8	siHTT_glial_mHTT	13.2458	speed		7	1	40764 glial_mHTT	9.06051	speed
2	1	27293 glial_mHTT	12.155	speed		7	2	40764 glial_mHTT	11.0909	speed
2	2	27293 glial_mHTT	10.9208	speed		7	3	40764 glial_mHTT	9.94823	speed
2	3	27293 glial_mHTT	10.0778	speed		7	4	40764 glial_mHTT	10.9694	speed
2	4	27293 glial_mHTT	10.1102	speed		7	5	40764 glial_mHTT	9.62188	speed
2	5	27293 glial_mHTT	10.2278	speed		8	1	40764 glial_mHTT	10.7964	speed
3	1	27293 glial_mHTT	8.75707	speed		8	2	40764 glial_mHTT	10.9248	speed
3	2	27293 glial_mHTT	11.9687	speed		8	3	40764 glial_mHTT	9.79885	speed
3	3	27293 glial_mHTT	11.3445	speed		8	4	40764 glial_mHTT	10.385	speed
3	4	27293 glial_mHTT	11.6535	speed		8	5	40764 glial_mHTT	8.71155	speed
3	5	27293 glial_mHTT	10.5576	speed		9	1	40764 glial_mHTT	9.02642	speed
4	1	27293 glial_mHTT	10.4687	speed		9	2	40764 glial_mHTT	8.47504	speed
4	2	27293 glial_mHTT	11.7333	speed		9	3	40764 glial_mHTT	7.89939	speed
4	3	27293 glial_mHTT	11.4442	speed		9	4	40764 glial_mHTT	9.60704	speed
4	4	27293 glial_mHTT	11.3821	speed		9	5	40764 glial_mHTT	8.56995	speed
4	5	27293 glial_mHTT	10.3943	speed
5	1	27293 glial_mHTT	11.8951	speed
5	2	27293 glial_mHTT	12.5475	speed
5	3	27293 glial_mHTT	7.84364	speed
5	4	27293 glial_mHTT	11.2821	speed
5	5	27293 glial_mHTT	9.57997	speed
6	1	27293 glial_mHTT	10.2756	speed
6	2	27293 glial_mHTT	10.2232	speed
6	3	27293 glial_mHTT	8.72378	speed
6	4	27293 glial_mHTT	10.6161	speed
6	5	27293 glial_mHTT	7.70731	speed
7	1	27293 glial_mHTT	8.32151	speed
7	2	27293 glial_mHTT	8.80711	speed
7	3	27293 glial_mHTT	5.59407	speed
7	4	27293 glial_mHTT	5.85469	speed
7	5	27293 glial_mHTT	7.44919	speed
8	1	27293 glial_mHTT	8.52021	speed
8	2	27293 glial_mHTT	8.06234	speed
8	3	27293 glial_mHTT	6.34687	speed
8	4	27293 glial_mHTT	7.42072	speed
8	5	27293 glial_mHTT	5.57519	speed
9	1	27293 glial_mHTT	6.81837	speed
9	2	27293 glial_mHTT	7.87043	speed
9	3	27293 glial_mHTT	4.59733	speed
9	4	27293 glial_mHTT	6.43856	speed
9	5	27293 glial_mHTT	5.61757	speed
10	1	27293 glial_mHTT	7.74556	speed
10	2	27293 glial_mHTT	8.32942	speed
10	3	27293 glial_mHTT	6.12256	speed
10	4	27293 glial_mHTT	7.55518	speed
10	5	27293 glial_mHTT	4.44888	speed
