# Supplementary material for: Downregulation of glial genes involved in synaptic function mitigates Huntington's disease pathogenesis
Source: eLife. 2021 Apr 19;10:e64564. doi: 10.7554/eLife.64564 (PMC8149125; doi:10.7554/eLife.64564)
Supplement: Figure 3—source data 1. [file elife-64564-fig3-data1.xlsx]

## Sheet: DLGAP (vlc, BDSC 10366)
Trialday	Replicate	Genotype	Observation	Metric
1	1	siHTT_glial_mHTT_glial_mHTT	14.6983	speed
1	2	siHTT_glial_mHTT_glial_mHTT	13.9544	speed
1	3	siHTT_glial_mHTT_glial_mHTT	14.8766	speed
2	1	siHTT_glial_mHTT_glial_mHTT	12.9743	speed
2	2	siHTT_glial_mHTT_glial_mHTT	13.7748	speed
2	3	siHTT_glial_mHTT_glial_mHTT	13.3707	speed
3	1	siHTT_glial_mHTT_glial_mHTT	13.9163	speed
3	2	siHTT_glial_mHTT_glial_mHTT	14.3869	speed
3	3	siHTT_glial_mHTT_glial_mHTT	15.6896	speed
4	1	siHTT_glial_mHTT_glial_mHTT	13.8129	speed
4	2	siHTT_glial_mHTT_glial_mHTT	15.7395	speed
4	3	siHTT_glial_mHTT_glial_mHTT	13.8324	speed
5	1	siHTT_glial_mHTT_glial_mHTT	13.2202	speed
5	2	siHTT_glial_mHTT_glial_mHTT	14.4498	speed
5	3	siHTT_glial_mHTT_glial_mHTT	14.3465	speed
6	1	siHTT_glial_mHTT_glial_mHTT	13.7867	speed
6	2	siHTT_glial_mHTT_glial_mHTT	12.248	speed
6	3	siHTT_glial_mHTT_glial_mHTT	13.3773	speed
7	1	siHTT_glial_mHTT_glial_mHTT	13.3907	speed
7	2	siHTT_glial_mHTT_glial_mHTT	13.4884	speed
7	3	siHTT_glial_mHTT_glial_mHTT	13.1857	speed
8	1	siHTT_glial_mHTT_glial_mHTT	13.3474	speed
8	2	siHTT_glial_mHTT_glial_mHTT	13.7372	speed
8	3	siHTT_glial_mHTT_glial_mHTT	12.7545	speed
9	1	siHTT_glial_mHTT_glial_mHTT	11.0971	speed
9	2	siHTT_glial_mHTT_glial_mHTT	12.4282	speed
9	3	siHTT_glial_mHTT_glial_mHTT	12.5166	speed
10	1	siHTT_glial_mHTT_glial_mHTT	11.0369	speed
10	2	siHTT_glial_mHTT_glial_mHTT	12.2654	speed
10	3	siHTT_glial_mHTT_glial_mHTT	9.9732	speed
1	5	siHTT_glial_mHTT_glial_mHTT	12.735	speed
1	6	siHTT_glial_mHTT_glial_mHTT	13.402	speed
1	7	siHTT_glial_mHTT_glial_mHTT	11.2455	speed
1	8	siHTT_glial_mHTT_glial_mHTT	11.0892	speed
1	9	siHTT_glial_mHTT_glial_mHTT	12.8551	speed
2	5	siHTT_glial_mHTT_glial_mHTT	14.4491	speed
2	6	siHTT_glial_mHTT_glial_mHTT	14.1297	speed
2	7	siHTT_glial_mHTT_glial_mHTT	14.4706	speed
2	8	siHTT_glial_mHTT_glial_mHTT	14.1541	speed
2	9	siHTT_glial_mHTT_glial_mHTT	13.3369	speed
3	5	siHTT_glial_mHTT_glial_mHTT	13.9978	speed
3	6	siHTT_glial_mHTT_glial_mHTT	12.6193	speed
3	7	siHTT_glial_mHTT_glial_mHTT	14.2305	speed
3	8	siHTT_glial_mHTT_glial_mHTT	12.8186	speed
3	9	siHTT_glial_mHTT_glial_mHTT	13.3705	speed
4	5	siHTT_glial_mHTT_glial_mHTT	15.0272	speed
4	6	siHTT_glial_mHTT_glial_mHTT	14.3367	speed
4	7	siHTT_glial_mHTT_glial_mHTT	15.7071	speed
4	8	siHTT_glial_mHTT_glial_mHTT	15.8445	speed
4	9	siHTT_glial_mHTT_glial_mHTT	15.2903	speed
5	5	siHTT_glial_mHTT_glial_mHTT	13.7611	speed
5	6	siHTT_glial_mHTT_glial_mHTT	11.5944	speed
5	7	siHTT_glial_mHTT_glial_mHTT	14.1516	speed
5	8	siHTT_glial_mHTT_glial_mHTT	9.68	speed
5	9	siHTT_glial_mHTT_glial_mHTT	13.3417	speed
6	5	siHTT_glial_mHTT_glial_mHTT	13.7765	speed
6	6	siHTT_glial_mHTT_glial_mHTT	12.6438	speed
6	7	siHTT_glial_mHTT_glial_mHTT	13.96	speed
6	8	siHTT_glial_mHTT_glial_mHTT	13.2865	speed
6	9	siHTT_glial_mHTT_glial_mHTT	13.6165	speed
7	5	siHTT_glial_mHTT_glial_mHTT	14.1565	speed
7	6	siHTT_glial_mHTT_glial_mHTT	11.9023	speed
7	7	siHTT_glial_mHTT_glial_mHTT	13.6582	speed
7	8	siHTT_glial_mHTT_glial_mHTT	14.479	speed
7	9	siHTT_glial_mHTT_glial_mHTT	13.6656	speed
8	5	siHTT_glial_mHTT_glial_mHTT	12.3725	speed
8	6	siHTT_glial_mHTT_glial_mHTT	12.4704	speed
8	7	siHTT_glial_mHTT_glial_mHTT	13.9575	speed
8	8	siHTT_glial_mHTT_glial_mHTT	13.853	speed
8	9	siHTT_glial_mHTT_glial_mHTT	13.5608	speed
9	5	siHTT_glial_mHTT_glial_mHTT	12.647	speed
9	6	siHTT_glial_mHTT_glial_mHTT	12.7331	speed
9	7	siHTT_glial_mHTT_glial_mHTT	12.8289	speed
9	8	siHTT_glial_mHTT_glial_mHTT	11.7203	speed
9	9	siHTT_glial_mHTT_glial_mHTT	11.7217	speed
10	5	siHTT_glial_mHTT_glial_mHTT	10.4857	speed
10	6	siHTT_glial_mHTT_glial_mHTT	10.9892	speed
10	7	siHTT_glial_mHTT_glial_mHTT	12.9136	speed
10	8	siHTT_glial_mHTT_glial_mHTT	11.3468	speed
10	9	siHTT_glial_mHTT_glial_mHTT	10.6724	speed
1	1	Non_targeting_hpRNA_glial_mHTT	14.3498	speed
1	2	Non_targeting_hpRNA_glial_mHTT	10.2378	speed
1	3	Non_targeting_hpRNA_glial_mHTT	14.4732	speed
1	4	Non_targeting_hpRNA_glial_mHTT	13.2945	speed
1	5	Non_targeting_hpRNA_glial_mHTT	13.8127	speed
1	6	Non_targeting_hpRNA_glial_mHTT	14.776	speed
2	1	Non_targeting_hpRNA_glial_mHTT	12.6336	speed
2	2	Non_targeting_hpRNA_glial_mHTT	11.9371	speed
2	3	Non_targeting_hpRNA_glial_mHTT	13.5202	speed
2	4	Non_targeting_hpRNA_glial_mHTT	12.886	speed
2	5	Non_targeting_hpRNA_glial_mHTT	12.6859	speed
2	6	Non_targeting_hpRNA_glial_mHTT	13.679	speed
3	1	Non_targeting_hpRNA_glial_mHTT	10.6717	speed
3	2	Non_targeting_hpRNA_glial_mHTT	10.4668	speed
3	3	Non_targeting_hpRNA_glial_mHTT	9.19962	speed
3	4	Non_targeting_hpRNA_glial_mHTT	11.0672	speed
3	5	Non_targeting_hpRNA_glial_mHTT	10.6973	speed
3	6	Non_targeting_hpRNA_glial_mHTT	10.7479	speed
4	1	Non_targeting_hpRNA_glial_mHTT	10.8075	speed
4	2	Non_targeting_hpRNA_glial_mHTT	9.76811	speed
4	3	Non_targeting_hpRNA_glial_mHTT	8.67595	speed
4	4	Non_targeting_hpRNA_glial_mHTT	8.81947	speed
4	5	Non_targeting_hpRNA_glial_mHTT	11.4573	speed
4	6	Non_targeting_hpRNA_glial_mHTT	9.04697	speed
5	1	Non_targeting_hpRNA_glial_mHTT	7.42801	speed
5	2	Non_targeting_hpRNA_glial_mHTT	8.70971	speed
5	3	Non_targeting_hpRNA_glial_mHTT	8.32988	speed
5	4	Non_targeting_hpRNA_glial_mHTT	8.64195	speed
5	5	Non_targeting_hpRNA_glial_mHTT	10.2817	speed
5	6	Non_targeting_hpRNA_glial_mHTT	7.39609	speed
6	1	Non_targeting_hpRNA_glial_mHTT	6.01934	speed
6	2	Non_targeting_hpRNA_glial_mHTT	4.19339	speed
6	3	Non_targeting_hpRNA_glial_mHTT	7.96493	speed
6	4	Non_targeting_hpRNA_glial_mHTT	2.89764	speed
6	5	Non_targeting_hpRNA_glial_mHTT	2.66243	speed
6	6	Non_targeting_hpRNA_glial_mHTT	3.22459	speed
7	1	Non_targeting_hpRNA_glial_mHTT	2.25996	speed
7	2	Non_targeting_hpRNA_glial_mHTT	5.08265	speed
7	3	Non_targeting_hpRNA_glial_mHTT	6.60984	speed
7	4	Non_targeting_hpRNA_glial_mHTT	1.64096	speed
7	5	Non_targeting_hpRNA_glial_mHTT	6.31938	speed
7	6	Non_targeting_hpRNA_glial_mHTT	2.07706	speed
8	1	Non_targeting_hpRNA_glial_mHTT	4.38614	speed
8	2	Non_targeting_hpRNA_glial_mHTT	3.12321	speed
8	3	Non_targeting_hpRNA_glial_mHTT	2.99439	speed
8	4	Non_targeting_hpRNA_glial_mHTT	1.34242	speed
8	5	Non_targeting_hpRNA_glial_mHTT	1.67448	speed
8	6	Non_targeting_hpRNA_glial_mHTT	4.26906	speed
9	1	Non_targeting_hpRNA_glial_mHTT	3.61807	speed
9	2	Non_targeting_hpRNA_glial_mHTT	2.89527	speed
9	3	Non_targeting_hpRNA_glial_mHTT	2.68766	speed
9	4	Non_targeting_hpRNA_glial_mHTT	2.88832	speed
9	5	Non_targeting_hpRNA_glial_mHTT	3.65966	speed
9	6	Non_targeting_hpRNA_glial_mHTT	3.00907	speed
10	1	Non_targeting_hpRNA_glial_mHTT	5.28803	speed
10	2	Non_targeting_hpRNA_glial_mHTT	2.33555	speed
10	3	Non_targeting_hpRNA_glial_mHTT	2.26193	speed
10	4	Non_targeting_hpRNA_glial_mHTT	5.98024	speed
10	5	Non_targeting_hpRNA_glial_mHTT	2.13988	speed
10	6	Non_targeting_hpRNA_glial_mHTT	3.63654	speed
1	7	Non_targeting_hpRNA_glial_mHTT	12.3337	speed
1	8	Non_targeting_hpRNA_glial_mHTT	12.1311	speed
1	9	Non_targeting_hpRNA_glial_mHTT	12.4799	speed
1	10	Non_targeting_hpRNA_glial_mHTT	11.0705	speed
1	11	Non_targeting_hpRNA_glial_mHTT	12.4959	speed
2	7	Non_targeting_hpRNA_glial_mHTT	12.9435	speed
2	8	Non_targeting_hpRNA_glial_mHTT	12.6084	speed
2	9	Non_targeting_hpRNA_glial_mHTT	12.6024	speed
2	10	Non_targeting_hpRNA_glial_mHTT	11.8015	speed
2	11	Non_targeting_hpRNA_glial_mHTT	12.5721	speed
3	7	Non_targeting_hpRNA_glial_mHTT	8.95917	speed
3	8	Non_targeting_hpRNA_glial_mHTT	10.1323	speed
3	9	Non_targeting_hpRNA_glial_mHTT	8.82169	speed
3	10	Non_targeting_hpRNA_glial_mHTT	10.344	speed
3	11	Non_targeting_hpRNA_glial_mHTT	10.2276	speed
4	7	Non_targeting_hpRNA_glial_mHTT	9.17405	speed
4	8	Non_targeting_hpRNA_glial_mHTT	10.6582	speed
4	9	Non_targeting_hpRNA_glial_mHTT	9.19565	speed
4	10	Non_targeting_hpRNA_glial_mHTT	9.56018	speed
4	11	Non_targeting_hpRNA_glial_mHTT	10.2975	speed
5	7	Non_targeting_hpRNA_glial_mHTT	9.49693	speed
5	8	Non_targeting_hpRNA_glial_mHTT	9.22347	speed
5	9	Non_targeting_hpRNA_glial_mHTT	9.11455	speed
5	10	Non_targeting_hpRNA_glial_mHTT	8.64865	speed
5	11	Non_targeting_hpRNA_glial_mHTT	9.631	speed
6	7	Non_targeting_hpRNA_glial_mHTT	7.67594	speed
6	8	Non_targeting_hpRNA_glial_mHTT	3.58495	speed
6	9	Non_targeting_hpRNA_glial_mHTT	8.18404	speed
6	10	Non_targeting_hpRNA_glial_mHTT	4.32908	speed
6	11	Non_targeting_hpRNA_glial_mHTT	8.25545	speed
7	7	Non_targeting_hpRNA_glial_mHTT	2.87928	speed
7	8	Non_targeting_hpRNA_glial_mHTT	2.69238	speed
7	9	Non_targeting_hpRNA_glial_mHTT	5.7798	speed
7	10	Non_targeting_hpRNA_glial_mHTT	4.34853	speed
7	11	Non_targeting_hpRNA_glial_mHTT	5.32132	speed
8	7	Non_targeting_hpRNA_glial_mHTT	3.15239	speed
8	8	Non_targeting_hpRNA_glial_mHTT	5.52424	speed
8	9	Non_targeting_hpRNA_glial_mHTT	2.98982	speed
8	10	Non_targeting_hpRNA_glial_mHTT	2.73057	speed
8	11	Non_targeting_hpRNA_glial_mHTT	5.60799	speed
9	7	Non_targeting_hpRNA_glial_mHTT	3.15606	speed
9	8	Non_targeting_hpRNA_glial_mHTT	3.54301	speed
9	9	Non_targeting_hpRNA_glial_mHTT	3.80226	speed
9	10	Non_targeting_hpRNA_glial_mHTT	1.91368	speed
9	11	Non_targeting_hpRNA_glial_mHTT	2.08747	speed
10	7	Non_targeting_hpRNA_glial_mHTT	1.57969	speed
10	8	Non_targeting_hpRNA_glial_mHTT	2.26035	speed
10	9	Non_targeting_hpRNA_glial_mHTT	4.80145	speed
10	10	Non_targeting_hpRNA_glial_mHTT	2.03875	speed
10	11	Non_targeting_hpRNA_glial_mHTT	2.44403	speed
1	1	vlc_10366_glial_mHTT	11.0612	speed
1	2	vlc_10366_glial_mHTT	10.9763	speed
1	3	vlc_10366_glial_mHTT	10.8976	speed
1	4	vlc_10366_glial_mHTT	11.5048	speed
1	5	vlc_10366_glial_mHTT	11.0558	speed
2	1	vlc_10366_glial_mHTT	12.11	speed
2	2	vlc_10366_glial_mHTT	12.8238	speed
2	3	vlc_10366_glial_mHTT	13.0003	speed
2	4	vlc_10366_glial_mHTT	13.4397	speed
2	5	vlc_10366_glial_mHTT	11.5727	speed
3	1	vlc_10366_glial_mHTT	12.8431	speed
3	2	vlc_10366_glial_mHTT	11.6301	speed
3	3	vlc_10366_glial_mHTT	11.8624	speed
3	4	vlc_10366_glial_mHTT	12.0855	speed
3	5	vlc_10366_glial_mHTT	11.551	speed
4	1	vlc_10366_glial_mHTT	16.1048	speed
4	2	vlc_10366_glial_mHTT	14.9613	speed
4	3	vlc_10366_glial_mHTT	13.6052	speed
4	4	vlc_10366_glial_mHTT	11.9683	speed
4	5	vlc_10366_glial_mHTT	11.537	speed
5	1	vlc_10366_glial_mHTT	12.2821	speed
5	2	vlc_10366_glial_mHTT	10.5341	speed
5	3	vlc_10366_glial_mHTT	10.82	speed
5	4	vlc_10366_glial_mHTT	12.043	speed
5	5	vlc_10366_glial_mHTT	10.9509	speed
6	1	vlc_10366_glial_mHTT	13.0138	speed
6	2	vlc_10366_glial_mHTT	10.1216	speed
6	3	vlc_10366_glial_mHTT	10.8503	speed
6	4	vlc_10366_glial_mHTT	11.2506	speed
6	5	vlc_10366_glial_mHTT	10.119	speed
7	1	vlc_10366_glial_mHTT	10.5912	speed
7	2	vlc_10366_glial_mHTT	7.68623	speed
7	3	vlc_10366_glial_mHTT	11.5171	speed
7	4	vlc_10366_glial_mHTT	10.6262	speed
7	5	vlc_10366_glial_mHTT	9.13031	speed
8	1	vlc_10366_glial_mHTT	4.85773	speed
8	2	vlc_10366_glial_mHTT	8.94391	speed
8	3	vlc_10366_glial_mHTT	10.2948	speed
8	4	vlc_10366_glial_mHTT	8.96554	speed
8	5	vlc_10366_glial_mHTT	9.79133	speed
9	1	vlc_10366_glial_mHTT	10.6915	speed
9	2	vlc_10366_glial_mHTT	8.31482	speed
9	3	vlc_10366_glial_mHTT	8.02845	speed
9	4	vlc_10366_glial_mHTT	7.97386	speed
9	5	vlc_10366_glial_mHTT	5.62948	speed
10	1	vlc_10366_glial_mHTT	4.27149	speed
10	2	vlc_10366_glial_mHTT	2.55103	speed
10	3	vlc_10366_glial_mHTT	5.9854	speed
10	4	vlc_10366_glial_mHTT	9.10265	speed
10	5	vlc_10366_glial_mHTT	4.40349	speed

## Sheet: AGAP2 (CenG1A, BDSC 44301)
Trialday	Replicate	Genotype	Observation	Metric
1	1	Non_targeting_hpRNA_glial_mHTT	12.186	speed
1	2	Non_targeting_hpRNA_glial_mHTT	12.7909	speed
2	1	Non_targeting_hpRNA_glial_mHTT	11.6151	speed
2	2	Non_targeting_hpRNA_glial_mHTT	12.1219	speed
3	1	Non_targeting_hpRNA_glial_mHTT	9.94744	speed
3	2	Non_targeting_hpRNA_glial_mHTT	11.7971	speed
4	1	Non_targeting_hpRNA_glial_mHTT	9.85299	speed
4	2	Non_targeting_hpRNA_glial_mHTT	10.6864	speed
5	1	Non_targeting_hpRNA_glial_mHTT	5.32302	speed
5	2	Non_targeting_hpRNA_glial_mHTT	10.4062	speed
6	1	Non_targeting_hpRNA_glial_mHTT	1.35658	speed
6	2	Non_targeting_hpRNA_glial_mHTT	6.91932	speed
7	1	Non_targeting_hpRNA_glial_mHTT	8.64577	speed
7	2	Non_targeting_hpRNA_glial_mHTT	8.6402	speed
8	1	Non_targeting_hpRNA_glial_mHTT	5.00066	speed
8	2	Non_targeting_hpRNA_glial_mHTT	6.39159	speed
1	3	Non_targeting_hpRNA_glial_mHTT	11.5646	speed
1	4	Non_targeting_hpRNA_glial_mHTT	10.6456	speed
1	5	Non_targeting_hpRNA_glial_mHTT	8.89028	speed
2	3	Non_targeting_hpRNA_glial_mHTT	9.55612	speed
2	4	Non_targeting_hpRNA_glial_mHTT	12.9619	speed
2	5	Non_targeting_hpRNA_glial_mHTT	12.984	speed
3	3	Non_targeting_hpRNA_glial_mHTT	9.64493	speed
3	4	Non_targeting_hpRNA_glial_mHTT	12.1723	speed
3	5	Non_targeting_hpRNA_glial_mHTT	10.8503	speed
4	3	Non_targeting_hpRNA_glial_mHTT	7.78815	speed
4	4	Non_targeting_hpRNA_glial_mHTT	6.44811	speed
4	5	Non_targeting_hpRNA_glial_mHTT	10.727	speed
5	3	Non_targeting_hpRNA_glial_mHTT	7.63764	speed
5	4	Non_targeting_hpRNA_glial_mHTT	9.00362	speed
5	5	Non_targeting_hpRNA_glial_mHTT	6.61344	speed
6	3	Non_targeting_hpRNA_glial_mHTT	7.03368	speed
6	4	Non_targeting_hpRNA_glial_mHTT	8.17837	speed
6	5	Non_targeting_hpRNA_glial_mHTT	4.80799	speed
7	3	Non_targeting_hpRNA_glial_mHTT	3.50538	speed
7	4	Non_targeting_hpRNA_glial_mHTT	5.17438	speed
7	5	Non_targeting_hpRNA_glial_mHTT	1.83189	speed
8	3	Non_targeting_hpRNA_glial_mHTT	5.40236	speed
8	4	Non_targeting_hpRNA_glial_mHTT	4.93599	speed
8	5	Non_targeting_hpRNA_glial_mHTT	5.66823	speed
9	3	Non_targeting_hpRNA_glial_mHTT	2.16147	speed
9	4	Non_targeting_hpRNA_glial_mHTT	2.57011	speed
9	5	Non_targeting_hpRNA_glial_mHTT	1.9203	speed
1	6	Non_targeting_hpRNA_glial_mHTT	10.9354	speed
2	6	Non_targeting_hpRNA_glial_mHTT	11.6443	speed
3	6	Non_targeting_hpRNA_glial_mHTT	13.4473	speed
4	6	Non_targeting_hpRNA_glial_mHTT	9.2254	speed
5	6	Non_targeting_hpRNA_glial_mHTT	11.5363	speed
6	6	Non_targeting_hpRNA_glial_mHTT	4.02543	speed
7	6	Non_targeting_hpRNA_glial_mHTT	2.12227	speed
8	6	Non_targeting_hpRNA_glial_mHTT	4.74043	speed
9	6	Non_targeting_hpRNA_glial_mHTT	4.6059	speed
1	1	siHTT_glial_mHTT	12.5356	speed
1	2	siHTT_glial_mHTT	11.4488	speed
2	1	siHTT_glial_mHTT	12.1656	speed
2	2	siHTT_glial_mHTT	13.2191	speed
3	1	siHTT_glial_mHTT	13.6606	speed
3	2	siHTT_glial_mHTT	11.9763	speed
4	1	siHTT_glial_mHTT	13.0399	speed
4	2	siHTT_glial_mHTT	10.0979	speed
5	1	siHTT_glial_mHTT	13.4475	speed
5	2	siHTT_glial_mHTT	11.978	speed
6	1	siHTT_glial_mHTT	13.5401	speed
6	2	siHTT_glial_mHTT	11.5133	speed
7	1	siHTT_glial_mHTT	12.4868	speed
7	2	siHTT_glial_mHTT	12.7704	speed
8	1	siHTT_glial_mHTT	11.8278	speed
8	2	siHTT_glial_mHTT	13.1025	speed
1	2	siHTT_glial_mHTT	10.2567	speed
1	3	siHTT_glial_mHTT	9.56936	speed
1	4	siHTT_glial_mHTT	11.8178	speed
2	2	siHTT_glial_mHTT	12.7563	speed
2	3	siHTT_glial_mHTT	13.1716	speed
2	4	siHTT_glial_mHTT	13.6013	speed
3	2	siHTT_glial_mHTT	14.3955	speed
3	3	siHTT_glial_mHTT	12.5809	speed
3	4	siHTT_glial_mHTT	13.2191	speed
4	2	siHTT_glial_mHTT	13.2839	speed
4	3	siHTT_glial_mHTT	13.8132	speed
4	4	siHTT_glial_mHTT	12.4869	speed
5	2	siHTT_glial_mHTT	13.31	speed
5	3	siHTT_glial_mHTT	10.8609	speed
5	4	siHTT_glial_mHTT	13.15	speed
6	2	siHTT_glial_mHTT	10.7814	speed
6	3	siHTT_glial_mHTT	14.081	speed
6	4	siHTT_glial_mHTT	13.5522	speed
7	2	siHTT_glial_mHTT	12.7851	speed
7	3	siHTT_glial_mHTT	12.3284	speed
7	4	siHTT_glial_mHTT	11.6353	speed
8	2	siHTT_glial_mHTT	12.551	speed
8	3	siHTT_glial_mHTT	12.3522	speed
8	4	siHTT_glial_mHTT	11.9198	speed
9	2	siHTT_glial_mHTT	12.8324	speed
9	3	siHTT_glial_mHTT	12.288	speed
9	4	siHTT_glial_mHTT	11.3166	speed
1	5	siHTT_glial_mHTT	11.3322	speed
1	6	siHTT_glial_mHTT	11.6054	speed
1	7	siHTT_glial_mHTT	10.7686	speed
2	5	siHTT_glial_mHTT	11.9043	speed
2	6	siHTT_glial_mHTT	11.5123	speed
2	7	siHTT_glial_mHTT	5.13955	speed
3	5	siHTT_glial_mHTT	14.1215	speed
3	6	siHTT_glial_mHTT	14.713	speed
3	7	siHTT_glial_mHTT	12.4855	speed
4	5	siHTT_glial_mHTT	13.1075	speed
4	6	siHTT_glial_mHTT	12.9115	speed
4	7	siHTT_glial_mHTT	13.2786	speed
5	5	siHTT_glial_mHTT	12.6432	speed
5	6	siHTT_glial_mHTT	10.2839	speed
5	7	siHTT_glial_mHTT	11.408	speed
6	5	siHTT_glial_mHTT	13.2561	speed
6	6	siHTT_glial_mHTT	12.3061	speed
6	7	siHTT_glial_mHTT	11.9249	speed
7	5	siHTT_glial_mHTT	12.5336	speed
7	6	siHTT_glial_mHTT	11.9912	speed
7	7	siHTT_glial_mHTT	11.0928	speed
8	5	siHTT_glial_mHTT	12.2642	speed
8	6	siHTT_glial_mHTT	14.0586	speed
8	7	siHTT_glial_mHTT	11.0016	speed
9	5	siHTT_glial_mHTT	9.9565	speed
9	6	siHTT_glial_mHTT	12.5028	speed
9	7	siHTT_glial_mHTT	9.82817	speed
1	1	CenG1A_44301_glial_mHTT	12.0776	speed
1	2	CenG1A_44301_glial_mHTT	12.2536	speed
1	3	CenG1A_44301_glial_mHTT	12.0529	speed
1	4	CenG1A_44301_glial_mHTT	10.9146	speed
1	5	CenG1A_44301_glial_mHTT	13.18	speed
1	6	CenG1A_44301_glial_mHTT	9.20687	speed
2	1	CenG1A_44301_glial_mHTT	12.7406	speed
2	2	CenG1A_44301_glial_mHTT	13.8629	speed
2	3	CenG1A_44301_glial_mHTT	12.9913	speed
2	4	CenG1A_44301_glial_mHTT	8.76033	speed
2	5	CenG1A_44301_glial_mHTT	4.99186	speed
2	6	CenG1A_44301_glial_mHTT	11.3532	speed
3	1	CenG1A_44301_glial_mHTT	13.7375	speed
3	2	CenG1A_44301_glial_mHTT	15.4123	speed
3	3	CenG1A_44301_glial_mHTT	14.3028	speed
3	4	CenG1A_44301_glial_mHTT	12.0086	speed
3	5	CenG1A_44301_glial_mHTT	14.0887	speed
3	6	CenG1A_44301_glial_mHTT	15.2845	speed
4	1	CenG1A_44301_glial_mHTT	12.7902	speed
4	2	CenG1A_44301_glial_mHTT	14.2499	speed
4	3	CenG1A_44301_glial_mHTT	14.1953	speed
4	4	CenG1A_44301_glial_mHTT	12.3946	speed
4	5	CenG1A_44301_glial_mHTT	14.996	speed
4	6	CenG1A_44301_glial_mHTT	13.4099	speed
5	1	CenG1A_44301_glial_mHTT	12.9828	speed
5	2	CenG1A_44301_glial_mHTT	11.6318	speed
5	3	CenG1A_44301_glial_mHTT	12.3376	speed
5	4	CenG1A_44301_glial_mHTT	11.1698	speed
5	5	CenG1A_44301_glial_mHTT	12.2724	speed
5	6	CenG1A_44301_glial_mHTT	7.0451	speed
6	1	CenG1A_44301_glial_mHTT	11.4919	speed
6	2	CenG1A_44301_glial_mHTT	11.6466	speed
6	3	CenG1A_44301_glial_mHTT	12.0924	speed
6	4	CenG1A_44301_glial_mHTT	11.2069	speed
6	5	CenG1A_44301_glial_mHTT	11.2231	speed
6	6	CenG1A_44301_glial_mHTT	10.8726	speed
7	1	CenG1A_44301_glial_mHTT	7.34953	speed
7	2	CenG1A_44301_glial_mHTT	9.28762	speed
7	3	CenG1A_44301_glial_mHTT	9.87392	speed
7	4	CenG1A_44301_glial_mHTT	8.99314	speed
7	5	CenG1A_44301_glial_mHTT	10.382	speed
7	6	CenG1A_44301_glial_mHTT	6.38872	speed
8	1	CenG1A_44301_glial_mHTT	9.05559	speed
8	2	CenG1A_44301_glial_mHTT	9.16418	speed
8	3	CenG1A_44301_glial_mHTT	10.7824	speed
8	4	CenG1A_44301_glial_mHTT	9.01564	speed
8	5	CenG1A_44301_glial_mHTT	7.59847	speed
8	6	CenG1A_44301_glial_mHTT	8.04369	speed
9	1	CenG1A_44301_glial_mHTT	8.8573	speed
9	2	CenG1A_44301_glial_mHTT	7.96532	speed
9	3	CenG1A_44301_glial_mHTT	9.90984	speed
9	4	CenG1A_44301_glial_mHTT	9.80593	speed
9	5	CenG1A_44301_glial_mHTT	8.83233	speed
9	6	CenG1A_44301_glial_mHTT	7.75774	speed

## Sheet: LRRTM1 (trn, BDSC 4550)
Trialday	Replicate	Genotype	Observation	Metric
1	1	siHTT_glial_mHTT	14.6983	speed
1	2	siHTT_glial_mHTT	13.9544	speed
1	3	siHTT_glial_mHTT	14.8766	speed
2	1	siHTT_glial_mHTT	12.9743	speed
2	2	siHTT_glial_mHTT	13.7748	speed
2	3	siHTT_glial_mHTT	13.3707	speed
3	1	siHTT_glial_mHTT	13.9163	speed
3	2	siHTT_glial_mHTT	14.3869	speed
3	3	siHTT_glial_mHTT	15.6896	speed
4	1	siHTT_glial_mHTT	13.8129	speed
4	2	siHTT_glial_mHTT	15.7395	speed
4	3	siHTT_glial_mHTT	13.8324	speed
5	1	siHTT_glial_mHTT	13.2202	speed
5	2	siHTT_glial_mHTT	14.4498	speed
5	3	siHTT_glial_mHTT	14.3465	speed
6	1	siHTT_glial_mHTT	13.7867	speed
6	2	siHTT_glial_mHTT	12.248	speed
6	3	siHTT_glial_mHTT	13.3773	speed
7	1	siHTT_glial_mHTT	13.3907	speed
7	2	siHTT_glial_mHTT	13.4884	speed
7	3	siHTT_glial_mHTT	13.1857	speed
8	1	siHTT_glial_mHTT	13.3474	speed
8	2	siHTT_glial_mHTT	13.7372	speed
8	3	siHTT_glial_mHTT	12.7545	speed
9	1	siHTT_glial_mHTT	11.0971	speed
9	2	siHTT_glial_mHTT	12.4282	speed
9	3	siHTT_glial_mHTT	12.5166	speed
10	1	siHTT_glial_mHTT	11.0369	speed
10	2	siHTT_glial_mHTT	12.2654	speed
10	3	siHTT_glial_mHTT	9.9732	speed
1	5	siHTT_glial_mHTT	12.735	speed
1	6	siHTT_glial_mHTT	13.402	speed
1	7	siHTT_glial_mHTT	11.2455	speed
1	8	siHTT_glial_mHTT	11.0892	speed
1	9	siHTT_glial_mHTT	12.8551	speed
2	5	siHTT_glial_mHTT	14.4491	speed
2	6	siHTT_glial_mHTT	14.1297	speed
2	7	siHTT_glial_mHTT	14.4706	speed
2	8	siHTT_glial_mHTT	14.1541	speed
2	9	siHTT_glial_mHTT	13.3369	speed
3	5	siHTT_glial_mHTT	13.9978	speed
3	6	siHTT_glial_mHTT	12.6193	speed
3	7	siHTT_glial_mHTT	14.2305	speed
3	8	siHTT_glial_mHTT	12.8186	speed
3	9	siHTT_glial_mHTT	13.3705	speed
4	5	siHTT_glial_mHTT	15.0272	speed
4	6	siHTT_glial_mHTT	14.3367	speed
4	7	siHTT_glial_mHTT	15.7071	speed
4	8	siHTT_glial_mHTT	15.8445	speed
4	9	siHTT_glial_mHTT	15.2903	speed
5	5	siHTT_glial_mHTT	13.7611	speed
5	6	siHTT_glial_mHTT	11.5944	speed
5	7	siHTT_glial_mHTT	14.1516	speed
5	8	siHTT_glial_mHTT	9.68	speed
5	9	siHTT_glial_mHTT	13.3417	speed
6	5	siHTT_glial_mHTT	13.7765	speed
6	6	siHTT_glial_mHTT	12.6438	speed
6	7	siHTT_glial_mHTT	13.96	speed
6	8	siHTT_glial_mHTT	13.2865	speed
6	9	siHTT_glial_mHTT	13.6165	speed
7	5	siHTT_glial_mHTT	14.1565	speed
7	6	siHTT_glial_mHTT	11.9023	speed
7	7	siHTT_glial_mHTT	13.6582	speed
7	8	siHTT_glial_mHTT	14.479	speed
7	9	siHTT_glial_mHTT	13.6656	speed
8	5	siHTT_glial_mHTT	12.3725	speed
8	6	siHTT_glial_mHTT	12.4704	speed
8	7	siHTT_glial_mHTT	13.9575	speed
8	8	siHTT_glial_mHTT	13.853	speed
8	9	siHTT_glial_mHTT	13.5608	speed
9	5	siHTT_glial_mHTT	12.647	speed
9	6	siHTT_glial_mHTT	12.7331	speed
9	7	siHTT_glial_mHTT	12.8289	speed
9	8	siHTT_glial_mHTT	11.7203	speed
9	9	siHTT_glial_mHTT	11.7217	speed
10	5	siHTT_glial_mHTT	10.4857	speed
10	6	siHTT_glial_mHTT	10.9892	speed
10	7	siHTT_glial_mHTT	12.9136	speed
10	8	siHTT_glial_mHTT	11.3468	speed
10	9	siHTT_glial_mHTT	10.6724	speed
1	1	Non_targeting_hpRNA_glial_mHTT	14.3498	speed
1	2	Non_targeting_hpRNA_glial_mHTT	10.2378	speed
1	3	Non_targeting_hpRNA_glial_mHTT	14.4732	speed
1	4	Non_targeting_hpRNA_glial_mHTT	13.2945	speed
1	5	Non_targeting_hpRNA_glial_mHTT	13.8127	speed
1	6	Non_targeting_hpRNA_glial_mHTT	14.776	speed
2	1	Non_targeting_hpRNA_glial_mHTT	12.6336	speed
2	2	Non_targeting_hpRNA_glial_mHTT	11.9371	speed
2	3	Non_targeting_hpRNA_glial_mHTT	13.5202	speed
2	4	Non_targeting_hpRNA_glial_mHTT	12.886	speed
2	5	Non_targeting_hpRNA_glial_mHTT	12.6859	speed
2	6	Non_targeting_hpRNA_glial_mHTT	13.679	speed
3	1	Non_targeting_hpRNA_glial_mHTT	10.6717	speed
3	2	Non_targeting_hpRNA_glial_mHTT	10.4668	speed
3	3	Non_targeting_hpRNA_glial_mHTT	9.19962	speed
3	4	Non_targeting_hpRNA_glial_mHTT	11.0672	speed
3	5	Non_targeting_hpRNA_glial_mHTT	10.6973	speed
3	6	Non_targeting_hpRNA_glial_mHTT	10.7479	speed
4	1	Non_targeting_hpRNA_glial_mHTT	10.8075	speed
4	2	Non_targeting_hpRNA_glial_mHTT	9.76811	speed
4	3	Non_targeting_hpRNA_glial_mHTT	8.67595	speed
4	4	Non_targeting_hpRNA_glial_mHTT	8.81947	speed
4	5	Non_targeting_hpRNA_glial_mHTT	11.4573	speed
4	6	Non_targeting_hpRNA_glial_mHTT	9.04697	speed
5	1	Non_targeting_hpRNA_glial_mHTT	7.42801	speed
5	2	Non_targeting_hpRNA_glial_mHTT	8.70971	speed
5	3	Non_targeting_hpRNA_glial_mHTT	8.32988	speed
5	4	Non_targeting_hpRNA_glial_mHTT	8.64195	speed
5	5	Non_targeting_hpRNA_glial_mHTT	10.2817	speed
5	6	Non_targeting_hpRNA_glial_mHTT	7.39609	speed
6	1	Non_targeting_hpRNA_glial_mHTT	6.01934	speed
6	2	Non_targeting_hpRNA_glial_mHTT	4.19339	speed
6	3	Non_targeting_hpRNA_glial_mHTT	7.96493	speed
6	4	Non_targeting_hpRNA_glial_mHTT	2.89764	speed
6	5	Non_targeting_hpRNA_glial_mHTT	2.66243	speed
6	6	Non_targeting_hpRNA_glial_mHTT	3.22459	speed
7	1	Non_targeting_hpRNA_glial_mHTT	2.25996	speed
7	2	Non_targeting_hpRNA_glial_mHTT	5.08265	speed
7	3	Non_targeting_hpRNA_glial_mHTT	6.60984	speed
7	4	Non_targeting_hpRNA_glial_mHTT	1.64096	speed
7	5	Non_targeting_hpRNA_glial_mHTT	6.31938	speed
7	6	Non_targeting_hpRNA_glial_mHTT	2.07706	speed
8	1	Non_targeting_hpRNA_glial_mHTT	4.38614	speed
8	2	Non_targeting_hpRNA_glial_mHTT	3.12321	speed
8	3	Non_targeting_hpRNA_glial_mHTT	2.99439	speed
8	4	Non_targeting_hpRNA_glial_mHTT	1.34242	speed
8	5	Non_targeting_hpRNA_glial_mHTT	1.67448	speed
8	6	Non_targeting_hpRNA_glial_mHTT	4.26906	speed
9	1	Non_targeting_hpRNA_glial_mHTT	3.61807	speed
9	2	Non_targeting_hpRNA_glial_mHTT	2.89527	speed
9	3	Non_targeting_hpRNA_glial_mHTT	2.68766	speed
9	4	Non_targeting_hpRNA_glial_mHTT	2.88832	speed
9	5	Non_targeting_hpRNA_glial_mHTT	3.65966	speed
9	6	Non_targeting_hpRNA_glial_mHTT	3.00907	speed
10	1	Non_targeting_hpRNA_glial_mHTT	5.28803	speed
10	2	Non_targeting_hpRNA_glial_mHTT	2.33555	speed
10	3	Non_targeting_hpRNA_glial_mHTT	2.26193	speed
10	4	Non_targeting_hpRNA_glial_mHTT	5.98024	speed
10	5	Non_targeting_hpRNA_glial_mHTT	2.13988	speed
10	6	Non_targeting_hpRNA_glial_mHTT	3.63654	speed
1	7	Non_targeting_hpRNA_glial_mHTT	12.3337	speed
1	8	Non_targeting_hpRNA_glial_mHTT	12.1311	speed
1	9	Non_targeting_hpRNA_glial_mHTT	12.4799	speed
1	10	Non_targeting_hpRNA_glial_mHTT	11.0705	speed
1	11	Non_targeting_hpRNA_glial_mHTT	12.4959	speed
2	7	Non_targeting_hpRNA_glial_mHTT	12.9435	speed
2	8	Non_targeting_hpRNA_glial_mHTT	12.6084	speed
2	9	Non_targeting_hpRNA_glial_mHTT	12.6024	speed
2	10	Non_targeting_hpRNA_glial_mHTT	11.8015	speed
2	11	Non_targeting_hpRNA_glial_mHTT	12.5721	speed
3	7	Non_targeting_hpRNA_glial_mHTT	8.95917	speed
3	8	Non_targeting_hpRNA_glial_mHTT	10.1323	speed
3	9	Non_targeting_hpRNA_glial_mHTT	8.82169	speed
3	10	Non_targeting_hpRNA_glial_mHTT	10.344	speed
3	11	Non_targeting_hpRNA_glial_mHTT	10.2276	speed
4	7	Non_targeting_hpRNA_glial_mHTT	9.17405	speed
4	8	Non_targeting_hpRNA_glial_mHTT	10.6582	speed
4	9	Non_targeting_hpRNA_glial_mHTT	9.19565	speed
4	10	Non_targeting_hpRNA_glial_mHTT	9.56018	speed
4	11	Non_targeting_hpRNA_glial_mHTT	10.2975	speed
5	7	Non_targeting_hpRNA_glial_mHTT	9.49693	speed
5	8	Non_targeting_hpRNA_glial_mHTT	9.22347	speed
5	9	Non_targeting_hpRNA_glial_mHTT	9.11455	speed
5	10	Non_targeting_hpRNA_glial_mHTT	8.64865	speed
5	11	Non_targeting_hpRNA_glial_mHTT	9.631	speed
6	7	Non_targeting_hpRNA_glial_mHTT	7.67594	speed
6	8	Non_targeting_hpRNA_glial_mHTT	3.58495	speed
6	9	Non_targeting_hpRNA_glial_mHTT	8.18404	speed
6	10	Non_targeting_hpRNA_glial_mHTT	4.32908	speed
6	11	Non_targeting_hpRNA_glial_mHTT	8.25545	speed
7	7	Non_targeting_hpRNA_glial_mHTT	2.87928	speed
7	8	Non_targeting_hpRNA_glial_mHTT	2.69238	speed
7	9	Non_targeting_hpRNA_glial_mHTT	5.7798	speed
7	10	Non_targeting_hpRNA_glial_mHTT	4.34853	speed
7	11	Non_targeting_hpRNA_glial_mHTT	5.32132	speed
8	7	Non_targeting_hpRNA_glial_mHTT	3.15239	speed
8	8	Non_targeting_hpRNA_glial_mHTT	5.52424	speed
8	9	Non_targeting_hpRNA_glial_mHTT	2.98982	speed
8	10	Non_targeting_hpRNA_glial_mHTT	2.73057	speed
8	11	Non_targeting_hpRNA_glial_mHTT	5.60799	speed
9	7	Non_targeting_hpRNA_glial_mHTT	3.15606	speed
9	8	Non_targeting_hpRNA_glial_mHTT	3.54301	speed
9	9	Non_targeting_hpRNA_glial_mHTT	3.80226	speed
9	10	Non_targeting_hpRNA_glial_mHTT	1.91368	speed
9	11	Non_targeting_hpRNA_glial_mHTT	2.08747	speed
10	7	Non_targeting_hpRNA_glial_mHTT	1.57969	speed
10	8	Non_targeting_hpRNA_glial_mHTT	2.26035	speed
10	9	Non_targeting_hpRNA_glial_mHTT	4.80145	speed
10	10	Non_targeting_hpRNA_glial_mHTT	2.03875	speed
10	11	Non_targeting_hpRNA_glial_mHTT	2.44403	speed
1	1	trn_4550_glial_mHTT	10.6933	speed
1	2	trn_4550_glial_mHTT	9.76194	speed
1	3	trn_4550_glial_mHTT	10.3591	speed
1	4	trn_4550_glial_mHTT	10.559	speed
1	5	trn_4550_glial_mHTT	10.1839	speed
2	1	trn_4550_glial_mHTT	12.7721	speed
2	2	trn_4550_glial_mHTT	12.3134	speed
2	3	trn_4550_glial_mHTT	12.1943	speed
2	4	trn_4550_glial_mHTT	12.4229	speed
2	5	trn_4550_glial_mHTT	12.2924	speed
3	1	trn_4550_glial_mHTT	10.7284	speed
3	2	trn_4550_glial_mHTT	11.59	speed
3	3	trn_4550_glial_mHTT	10.8795	speed
3	4	trn_4550_glial_mHTT	11.101	speed
3	5	trn_4550_glial_mHTT	10.9757	speed
4	1	trn_4550_glial_mHTT	12.948	speed
4	2	trn_4550_glial_mHTT	12.9927	speed
4	3	trn_4550_glial_mHTT	11.4985	speed
4	4	trn_4550_glial_mHTT	11.4417	speed
4	5	trn_4550_glial_mHTT	11.5746	speed
5	1	trn_4550_glial_mHTT	10.3825	speed
5	2	trn_4550_glial_mHTT	11.2089	speed
5	3	trn_4550_glial_mHTT	10.7911	speed
5	4	trn_4550_glial_mHTT	10.819	speed
5	5	trn_4550_glial_mHTT	8.67607	speed
6	1	trn_4550_glial_mHTT	11.7903	speed
6	2	trn_4550_glial_mHTT	10.0428	speed
6	3	trn_4550_glial_mHTT	9.07066	speed
6	4	trn_4550_glial_mHTT	10.4996	speed
6	5	trn_4550_glial_mHTT	11.0201	speed
7	1	trn_4550_glial_mHTT	9.87428	speed
7	2	trn_4550_glial_mHTT	8.39848	speed
7	3	trn_4550_glial_mHTT	10.8411	speed
7	4	trn_4550_glial_mHTT	9.06662	speed
7	5	trn_4550_glial_mHTT	10.8718	speed
8	1	trn_4550_glial_mHTT	8.7184	speed
8	2	trn_4550_glial_mHTT	7.94925	speed
8	3	trn_4550_glial_mHTT	9.896	speed
8	4	trn_4550_glial_mHTT	10.0852	speed
8	5	trn_4550_glial_mHTT	10.7236	speed
9	1	trn_4550_glial_mHTT	4.15578	speed
9	2	trn_4550_glial_mHTT	3.12679	speed
9	3	trn_4550_glial_mHTT	4.02145	speed
9	4	trn_4550_glial_mHTT	6.38994	speed
9	5	trn_4550_glial_mHTT	9.136	speed
10	1	trn_4550_glial_mHTT	2.28124	speed
10	2	trn_4550_glial_mHTT	2.42421	speed
10	3	trn_4550_glial_mHTT	2.3584	speed
10	4	trn_4550_glial_mHTT	4.78922	speed
10	5	trn_4550_glial_mHTT	5.49655	speed

## Sheet: EPB41L2 (cora, BDSC 9099)
Trialday	Replicate	Genotype	Observation	Metric
2	1	Non_targeting_hpRNA_glial_mHTT	14.2278	speed
2	2	Non_targeting_hpRNA_glial_mHTT	15.5571	speed
2	3	Non_targeting_hpRNA_glial_mHTT	14.5411	speed
3	1	Non_targeting_hpRNA_glial_mHTT	12.1723	speed
3	2	Non_targeting_hpRNA_glial_mHTT	12.2934	speed
3	3	Non_targeting_hpRNA_glial_mHTT	9.53973	speed
4	1	Non_targeting_hpRNA_glial_mHTT	8.78102	speed
4	2	Non_targeting_hpRNA_glial_mHTT	10.7369	speed
4	3	Non_targeting_hpRNA_glial_mHTT	9.95084	speed
5	1	Non_targeting_hpRNA_glial_mHTT	5.73557	speed
5	2	Non_targeting_hpRNA_glial_mHTT	9.92094	speed
5	3	Non_targeting_hpRNA_glial_mHTT	10.0181	speed
6	1	Non_targeting_hpRNA_glial_mHTT	4.91453	speed
6	2	Non_targeting_hpRNA_glial_mHTT	9.42369	speed
6	3	Non_targeting_hpRNA_glial_mHTT	9.29628	speed
7	1	Non_targeting_hpRNA_glial_mHTT	4.65538	speed
7	2	Non_targeting_hpRNA_glial_mHTT	4.87125	speed
7	3	Non_targeting_hpRNA_glial_mHTT	8.14019	speed
8	1	Non_targeting_hpRNA_glial_mHTT	3.44567	speed
8	2	Non_targeting_hpRNA_glial_mHTT	5.02795	speed
8	3	Non_targeting_hpRNA_glial_mHTT	4.10722	speed
9	1	Non_targeting_hpRNA_glial_mHTT	6.6524	speed
9	2	Non_targeting_hpRNA_glial_mHTT	7.84532	speed
9	3	Non_targeting_hpRNA_glial_mHTT	7.73044	speed
10	1	Non_targeting_hpRNA_glial_mHTT	3.7822	speed
10	2	Non_targeting_hpRNA_glial_mHTT	3.05975	speed
10	3	Non_targeting_hpRNA_glial_mHTT	6.99881	speed
2	4	Non_targeting_hpRNA_glial_mHTT	11.6946	speed
2	5	Non_targeting_hpRNA_glial_mHTT	12.322	speed
2	6	Non_targeting_hpRNA_glial_mHTT	11.7243	speed
2	7	Non_targeting_hpRNA_glial_mHTT	11.9576	speed
2	8	Non_targeting_hpRNA_glial_mHTT	10.4241	speed
2	9	Non_targeting_hpRNA_glial_mHTT	11.88	speed
3	4	Non_targeting_hpRNA_glial_mHTT	11.9101	speed
3	5	Non_targeting_hpRNA_glial_mHTT	12.1479	speed
3	6	Non_targeting_hpRNA_glial_mHTT	12.3648	speed
3	7	Non_targeting_hpRNA_glial_mHTT	13.3803	speed
3	8	Non_targeting_hpRNA_glial_mHTT	10.8529	speed
3	9	Non_targeting_hpRNA_glial_mHTT	11.6781	speed
4	4	Non_targeting_hpRNA_glial_mHTT	8.41563	speed
4	5	Non_targeting_hpRNA_glial_mHTT	11.4763	speed
4	6	Non_targeting_hpRNA_glial_mHTT	10.7076	speed
4	7	Non_targeting_hpRNA_glial_mHTT	10.2271	speed
4	8	Non_targeting_hpRNA_glial_mHTT	10.6616	speed
4	9	Non_targeting_hpRNA_glial_mHTT	10.7341	speed
5	4	Non_targeting_hpRNA_glial_mHTT	7.73139	speed
5	5	Non_targeting_hpRNA_glial_mHTT	8.67637	speed
5	6	Non_targeting_hpRNA_glial_mHTT	8.29841	speed
5	7	Non_targeting_hpRNA_glial_mHTT	5.94291	speed
5	8	Non_targeting_hpRNA_glial_mHTT	7.57793	speed
5	9	Non_targeting_hpRNA_glial_mHTT	9.04111	speed
6	4	Non_targeting_hpRNA_glial_mHTT	7.13998	speed
6	5	Non_targeting_hpRNA_glial_mHTT	8.83237	speed
6	6	Non_targeting_hpRNA_glial_mHTT	7.65282	speed
6	7	Non_targeting_hpRNA_glial_mHTT	7.90555	speed
6	8	Non_targeting_hpRNA_glial_mHTT	8.78279	speed
6	9	Non_targeting_hpRNA_glial_mHTT	9.46893	speed
7	4	Non_targeting_hpRNA_glial_mHTT	5.6189	speed
7	5	Non_targeting_hpRNA_glial_mHTT	5.35695	speed
7	6	Non_targeting_hpRNA_glial_mHTT	6.16701	speed
7	7	Non_targeting_hpRNA_glial_mHTT	6.5794	speed
7	8	Non_targeting_hpRNA_glial_mHTT	3.15871	speed
7	9	Non_targeting_hpRNA_glial_mHTT	6.84853	speed
8	4	Non_targeting_hpRNA_glial_mHTT	3.70587	speed
8	5	Non_targeting_hpRNA_glial_mHTT	5.43729	speed
8	6	Non_targeting_hpRNA_glial_mHTT	4.08136	speed
8	7	Non_targeting_hpRNA_glial_mHTT	6.7945	speed
8	8	Non_targeting_hpRNA_glial_mHTT	5.31661	speed
8	9	Non_targeting_hpRNA_glial_mHTT	5.52046	speed
9	4	Non_targeting_hpRNA_glial_mHTT	4.34657	speed
9	5	Non_targeting_hpRNA_glial_mHTT	2.85177	speed
9	6	Non_targeting_hpRNA_glial_mHTT	4.6864	speed
9	7	Non_targeting_hpRNA_glial_mHTT	4.86627	speed
9	8	Non_targeting_hpRNA_glial_mHTT	5.56095	speed
9	9	Non_targeting_hpRNA_glial_mHTT	5.22565	speed
10	4	Non_targeting_hpRNA_glial_mHTT	5.04009	speed
10	5	Non_targeting_hpRNA_glial_mHTT	6.0648	speed
10	6	Non_targeting_hpRNA_glial_mHTT	5.77228	speed
10	7	Non_targeting_hpRNA_glial_mHTT	5.35377	speed
10	8	Non_targeting_hpRNA_glial_mHTT	6.00173	speed
10	9	Non_targeting_hpRNA_glial_mHTT	5.95935	speed
2	1	siHTT_glial_mHTT	13.2992	speed
2	2	siHTT_glial_mHTT	13.3696	speed
2	3	siHTT_glial_mHTT	13.4244	speed
3	1	siHTT_glial_mHTT	12.2189	speed
3	2	siHTT_glial_mHTT	15.1816	speed
3	3	siHTT_glial_mHTT	13.605	speed
4	1	siHTT_glial_mHTT	9.0569	speed
4	2	siHTT_glial_mHTT	11.138	speed
4	3	siHTT_glial_mHTT	11.5359	speed
5	1	siHTT_glial_mHTT	10.8251	speed
5	2	siHTT_glial_mHTT	12.4236	speed
5	3	siHTT_glial_mHTT	11.2458	speed
6	1	siHTT_glial_mHTT	11.8401	speed
6	2	siHTT_glial_mHTT	13.5891	speed
6	3	siHTT_glial_mHTT	12.2754	speed
7	1	siHTT_glial_mHTT	11.1653	speed
7	2	siHTT_glial_mHTT	11.6307	speed
7	3	siHTT_glial_mHTT	11.1752	speed
8	1	siHTT_glial_mHTT	12.4244	speed
8	2	siHTT_glial_mHTT	12.1311	speed
8	3	siHTT_glial_mHTT	11.0372	speed
9	1	siHTT_glial_mHTT	11.8206	speed
9	2	siHTT_glial_mHTT	10.974	speed
9	3	siHTT_glial_mHTT	11.8046	speed
10	1	siHTT_glial_mHTT	12.2077	speed
10	2	siHTT_glial_mHTT	11.9961	speed
10	3	siHTT_glial_mHTT	11.2358	speed
2	4	siHTT_glial_mHTT	12.0412	speed
2	5	siHTT_glial_mHTT	13.1155	speed
2	6	siHTT_glial_mHTT	13.2336	speed
2	7	siHTT_glial_mHTT	11.8445	speed
2	8	siHTT_glial_mHTT	12.1505	speed
3	4	siHTT_glial_mHTT	13.8722	speed
3	5	siHTT_glial_mHTT	13.3553	speed
3	6	siHTT_glial_mHTT	12.6795	speed
3	7	siHTT_glial_mHTT	12.2869	speed
3	8	siHTT_glial_mHTT	12.6874	speed
4	4	siHTT_glial_mHTT	12.913	speed
4	5	siHTT_glial_mHTT	12.3921	speed
4	6	siHTT_glial_mHTT	11.0439	speed
4	7	siHTT_glial_mHTT	10.6887	speed
4	8	siHTT_glial_mHTT	11.7876	speed
5	4	siHTT_glial_mHTT	11.9177	speed
5	5	siHTT_glial_mHTT	12.4605	speed
5	6	siHTT_glial_mHTT	11.0883	speed
5	7	siHTT_glial_mHTT	11.2689	speed
5	8	siHTT_glial_mHTT	11.3274	speed
6	4	siHTT_glial_mHTT	11.056	speed
6	5	siHTT_glial_mHTT	11.9035	speed
6	6	siHTT_glial_mHTT	10.2836	speed
6	7	siHTT_glial_mHTT	11.5262	speed
6	8	siHTT_glial_mHTT	13.6128	speed
7	4	siHTT_glial_mHTT	10.765	speed
7	5	siHTT_glial_mHTT	11.6304	speed
7	6	siHTT_glial_mHTT	8.73746	speed
7	7	siHTT_glial_mHTT	10.5596	speed
7	8	siHTT_glial_mHTT	9.94202	speed
8	4	siHTT_glial_mHTT	11.6355	speed
8	5	siHTT_glial_mHTT	12.9402	speed
8	6	siHTT_glial_mHTT	10.6889	speed
8	7	siHTT_glial_mHTT	9.80732	speed
8	8	siHTT_glial_mHTT	11.5471	speed
9	4	siHTT_glial_mHTT	11.4795	speed
9	5	siHTT_glial_mHTT	12.4085	speed
9	6	siHTT_glial_mHTT	9.7591	speed
9	7	siHTT_glial_mHTT	10.2836	speed
9	8	siHTT_glial_mHTT	11.8668	speed
10	4	siHTT_glial_mHTT	13.3354	speed
10	5	siHTT_glial_mHTT	9.84851	speed
10	6	siHTT_glial_mHTT	12.4092	speed
10	7	siHTT_glial_mHTT	11.8995	speed
10	8	siHTT_glial_mHTT	13.2458	speed
2	1	cora_9099_glial_mHTT	15.5098	speed
3	1	cora_9099_glial_mHTT	15.3523	speed
4	1	cora_9099_glial_mHTT	12.0518	speed
5	1	cora_9099_glial_mHTT	10.9192	speed
6	1	cora_9099_glial_mHTT	11.6385	speed
7	1	cora_9099_glial_mHTT	6.867	speed
8	1	cora_9099_glial_mHTT	9.64999	speed
9	1	cora_9099_glial_mHTT	8.7366	speed
10	1	cora_9099_glial_mHTT	7.56705	speed
2	2	cora_9099_glial_mHTT	13.6503	speed
2	3	cora_9099_glial_mHTT	10.6322	speed
2	4	cora_9099_glial_mHTT	12.0733	speed
2	5	cora_9099_glial_mHTT	11.5354	speed
3	2	cora_9099_glial_mHTT	13.4154	speed
3	3	cora_9099_glial_mHTT	12.8218	speed
3	4	cora_9099_glial_mHTT	12.6818	speed
3	5	cora_9099_glial_mHTT	13.1658	speed
4	2	cora_9099_glial_mHTT	12.0616	speed
4	3	cora_9099_glial_mHTT	11.3578	speed
4	4	cora_9099_glial_mHTT	11.5019	speed
4	5	cora_9099_glial_mHTT	11.4135	speed
5	2	cora_9099_glial_mHTT	10.9232	speed
5	3	cora_9099_glial_mHTT	10.9879	speed
5	4	cora_9099_glial_mHTT	11.1641	speed
5	5	cora_9099_glial_mHTT	10.5124	speed
6	2	cora_9099_glial_mHTT	12.4828	speed
6	3	cora_9099_glial_mHTT	10.5572	speed
6	4	cora_9099_glial_mHTT	11.7002	speed
6	5	cora_9099_glial_mHTT	7.58754	speed
7	2	cora_9099_glial_mHTT	10.8115	speed
7	3	cora_9099_glial_mHTT	8.29134	speed
7	4	cora_9099_glial_mHTT	7.5703	speed
7	5	cora_9099_glial_mHTT	8.41639	speed
8	2	cora_9099_glial_mHTT	9.42318	speed
8	3	cora_9099_glial_mHTT	5.00226	speed
8	4	cora_9099_glial_mHTT	7.52591	speed
8	5	cora_9099_glial_mHTT	8.62258	speed
9	2	cora_9099_glial_mHTT	7.90367	speed
9	3	cora_9099_glial_mHTT	6.40063	speed
9	4	cora_9099_glial_mHTT	7.27188	speed
9	5	cora_9099_glial_mHTT	7.29381	speed
10	2	cora_9099_glial_mHTT	7.16878	speed
10	3	cora_9099_glial_mHTT	6.83097	speed
10	4	cora_9099_glial_mHTT	5.00702	speed
10	5	cora_9099_glial_mHTT	5.6792	speed

## Sheet: SYT13 (Sytbeta VDCR 106559)
Trialday	Replicate	Genotype	Observation	Metric
1	1	HTT_si_repo_NT	11.6776	speed
2	1	HTT_si_repo_NT	12.0328	speed
3	1	HTT_si_repo_NT	11.3722	speed
4	1	HTT_si_repo_NT	11.8439	speed
5	1	HTT_si_repo_NT	8.98182	speed
6	1	HTT_si_repo_NT	10.4872	speed
7	1	HTT_si_repo_NT	11.0565	speed
8	1	HTT_si_repo_NT	9.43098	speed
9	1	HTT_si_repo_NT	10.2866	speed
1	2	HTT_si_repo_NT	11.1304	speed
1	3	HTT_si_repo_NT	11.7432	speed
1	4	HTT_si_repo_NT	12.178	speed
1	5	HTT_si_repo_NT	12.2026	speed
1	6	HTT_si_repo_NT	10.5363	speed
1	7	HTT_si_repo_NT	11.2252	speed
1	8	HTT_si_repo_NT	9.85915	speed
1	9	HTT_si_repo_NT	10.2241	speed
1	10	HTT_si_repo_NT	11.864	speed
1	11	HTT_si_repo_NT	12.2195	speed
2	2	HTT_si_repo_NT	12.1171	speed
2	3	HTT_si_repo_NT	13.7433	speed
2	4	HTT_si_repo_NT	11.6015	speed
2	5	HTT_si_repo_NT	13.3805	speed
2	6	HTT_si_repo_NT	11.7028	speed
2	7	HTT_si_repo_NT	12.5929	speed
2	8	HTT_si_repo_NT	12.7692	speed
2	9	HTT_si_repo_NT	11.7835	speed
2	10	HTT_si_repo_NT	13.1984	speed
2	11	HTT_si_repo_NT	12.3759	speed
3	2	HTT_si_repo_NT	11.4314	speed
3	3	HTT_si_repo_NT	12.8252	speed
3	4	HTT_si_repo_NT	11.1103	speed
3	5	HTT_si_repo_NT	13.9536	speed
3	6	HTT_si_repo_NT	12.2395	speed
3	7	HTT_si_repo_NT	11.9881	speed
3	8	HTT_si_repo_NT	12.4933	speed
3	9	HTT_si_repo_NT	12.0104	speed
3	10	HTT_si_repo_NT	12.5815	speed
3	11	HTT_si_repo_NT	13.2395	speed
3	12	HTT_si_repo_NT	12.7287	speed
4	2	HTT_si_repo_NT	12.3754	speed
4	3	HTT_si_repo_NT	13.2131	speed
4	4	HTT_si_repo_NT	11.0852	speed
4	5	HTT_si_repo_NT	6.14971	speed
4	6	HTT_si_repo_NT	12.4154	speed
4	7	HTT_si_repo_NT	11.4226	speed
4	8	HTT_si_repo_NT	12.7347	speed
4	9	HTT_si_repo_NT	11.9037	speed
4	10	HTT_si_repo_NT	11.0361	speed
4	11	HTT_si_repo_NT	7.16206	speed
4	12	HTT_si_repo_NT	12.3715	speed
5	2	HTT_si_repo_NT	10.2003	speed
5	3	HTT_si_repo_NT	13.3692	speed
5	4	HTT_si_repo_NT	11.0697	speed
5	5	HTT_si_repo_NT	12.2186	speed
5	6	HTT_si_repo_NT	11.1897	speed
5	7	HTT_si_repo_NT	10.975	speed
5	8	HTT_si_repo_NT	10.364	speed
5	11	HTT_si_repo_NT	13.3944	speed
5	12	HTT_si_repo_NT	13.7832	speed
6	2	HTT_si_repo_NT	11.4127	speed
6	3	HTT_si_repo_NT	12.2705	speed
6	4	HTT_si_repo_NT	10.7582	speed
6	5	HTT_si_repo_NT	12.2527	speed
6	6	HTT_si_repo_NT	10.2628	speed
6	7	HTT_si_repo_NT	10.5368	speed
6	8	HTT_si_repo_NT	13.2073	speed
6	9	HTT_si_repo_NT	11.307	speed
6	10	HTT_si_repo_NT	10.3073	speed
6	11	HTT_si_repo_NT	11.7229	speed
6	12	HTT_si_repo_NT	12.2721	speed
7	2	HTT_si_repo_NT	10.7417	speed
7	3	HTT_si_repo_NT	11.3534	speed
7	4	HTT_si_repo_NT	9.91126	speed
7	5	HTT_si_repo_NT	12.2932	speed
7	6	HTT_si_repo_NT	10.9339	speed
7	7	HTT_si_repo_NT	10.182	speed
7	8	HTT_si_repo_NT	10.3641	speed
7	9	HTT_si_repo_NT	9.36013	speed
7	10	HTT_si_repo_NT	10.9701	speed
7	11	HTT_si_repo_NT	10.8141	speed
7	12	HTT_si_repo_NT	10.4026	speed
8	2	HTT_si_repo_NT	9.61868	speed
8	3	HTT_si_repo_NT	11.56	speed
8	4	HTT_si_repo_NT	9.62314	speed
8	5	HTT_si_repo_NT	12.1422	speed
8	6	HTT_si_repo_NT	10.8608	speed
8	7	HTT_si_repo_NT	9.99514	speed
8	8	HTT_si_repo_NT	11.568	speed
8	9	HTT_si_repo_NT	11.6967	speed
8	10	HTT_si_repo_NT	11.193	speed
8	11	HTT_si_repo_NT	11.4786	speed
8	12	HTT_si_repo_NT	11.8078	speed
9	2	HTT_si_repo_NT	9.83765	speed
9	3	HTT_si_repo_NT	11.8075	speed
9	4	HTT_si_repo_NT	9.6659	speed
10	5	HTT_si_repo_NT	11.2256	speed
10	6	HTT_si_repo_NT	9.5912	speed
10	7	HTT_si_repo_NT	8.36443	speed
10	8	HTT_si_repo_NT	9.80208	speed
10	11	HTT_si_repo_NT	9.17704	speed
10	12	HTT_si_repo_NT	11.2724	speed
1	1	Non_targeting_hpRNA_glial_mHTT	12.2947	speed
1	2	Non_targeting_hpRNA_glial_mHTT	12.539	speed
1	3	Non_targeting_hpRNA_glial_mHTT	11.7268	speed
1	4	Non_targeting_hpRNA_glial_mHTT	10.6945	speed
1	5	Non_targeting_hpRNA_glial_mHTT	11.3713	speed
1	6	Non_targeting_hpRNA_glial_mHTT	11.5927	speed
1	7	Non_targeting_hpRNA_glial_mHTT	11.6006	speed
1	8	Non_targeting_hpRNA_glial_mHTT	11.0395	speed
1	9	Non_targeting_hpRNA_glial_mHTT	9.84753	speed
1	10	Non_targeting_hpRNA_glial_mHTT	11.0663	speed
1	11	Non_targeting_hpRNA_glial_mHTT	12.065	speed
2	1	Non_targeting_hpRNA_glial_mHTT	12.8505	speed
2	2	Non_targeting_hpRNA_glial_mHTT	10.4477	speed
2	3	Non_targeting_hpRNA_glial_mHTT	11.2983	speed
2	4	Non_targeting_hpRNA_glial_mHTT	9.70169	speed
2	5	Non_targeting_hpRNA_glial_mHTT	10.9079	speed
2	6	Non_targeting_hpRNA_glial_mHTT	11.4371	speed
2	7	Non_targeting_hpRNA_glial_mHTT	11.0233	speed
2	8	Non_targeting_hpRNA_glial_mHTT	11.48	speed
2	9	Non_targeting_hpRNA_glial_mHTT	10.5753	speed
2	10	Non_targeting_hpRNA_glial_mHTT	10.6327	speed
2	11	Non_targeting_hpRNA_glial_mHTT	11.1785	speed
3	1	Non_targeting_hpRNA_glial_mHTT	10.1471	speed
3	2	Non_targeting_hpRNA_glial_mHTT	9.57934	speed
3	3	Non_targeting_hpRNA_glial_mHTT	10.3119	speed
3	4	Non_targeting_hpRNA_glial_mHTT	7.83033	speed
3	5	Non_targeting_hpRNA_glial_mHTT	10.3054	speed
3	6	Non_targeting_hpRNA_glial_mHTT	9.45921	speed
3	7	Non_targeting_hpRNA_glial_mHTT	9.7389	speed
3	8	Non_targeting_hpRNA_glial_mHTT	10.9143	speed
3	9	Non_targeting_hpRNA_glial_mHTT	9.63692	speed
3	10	Non_targeting_hpRNA_glial_mHTT	10.2763	speed
3	11	Non_targeting_hpRNA_glial_mHTT	11.1384	speed
3	12	Non_targeting_hpRNA_glial_mHTT	10.5967	speed
4	1	Non_targeting_hpRNA_glial_mHTT	8.7975	speed
4	2	Non_targeting_hpRNA_glial_mHTT	7.88503	speed
4	3	Non_targeting_hpRNA_glial_mHTT	9.14295	speed
4	4	Non_targeting_hpRNA_glial_mHTT	7.53403	speed
4	5	Non_targeting_hpRNA_glial_mHTT	9.77786	speed
4	6	Non_targeting_hpRNA_glial_mHTT	8.46567	speed
4	7	Non_targeting_hpRNA_glial_mHTT	8.59036	speed
4	8	Non_targeting_hpRNA_glial_mHTT	8.81224	speed
4	9	Non_targeting_hpRNA_glial_mHTT	9.16995	speed
4	10	Non_targeting_hpRNA_glial_mHTT	8.55572	speed
4	11	Non_targeting_hpRNA_glial_mHTT	9.70856	speed
4	12	Non_targeting_hpRNA_glial_mHTT	6.41592	speed
5	1	Non_targeting_hpRNA_glial_mHTT	10.7769	speed
5	2	Non_targeting_hpRNA_glial_mHTT	6.68884	speed
5	3	Non_targeting_hpRNA_glial_mHTT	9.04822	speed
5	4	Non_targeting_hpRNA_glial_mHTT	7.73946	speed
5	5	Non_targeting_hpRNA_glial_mHTT	7.68996	speed
5	6	Non_targeting_hpRNA_glial_mHTT	7.4998	speed
5	7	Non_targeting_hpRNA_glial_mHTT	7.8901	speed
5	10	Non_targeting_hpRNA_glial_mHTT	5.2858	speed
5	11	Non_targeting_hpRNA_glial_mHTT	9.40396	speed
5	12	Non_targeting_hpRNA_glial_mHTT	10.1336	speed
6	1	Non_targeting_hpRNA_glial_mHTT	7.9839	speed
6	2	Non_targeting_hpRNA_glial_mHTT	6.53294	speed
6	3	Non_targeting_hpRNA_glial_mHTT	8.33055	speed
6	4	Non_targeting_hpRNA_glial_mHTT	6.36594	speed
6	5	Non_targeting_hpRNA_glial_mHTT	5.71189	speed
6	6	Non_targeting_hpRNA_glial_mHTT	7.22377	speed
6	7	Non_targeting_hpRNA_glial_mHTT	6.99758	speed
6	8	Non_targeting_hpRNA_glial_mHTT	8.76409	speed
6	9	Non_targeting_hpRNA_glial_mHTT	7.15761	speed
6	10	Non_targeting_hpRNA_glial_mHTT	5.57106	speed
6	11	Non_targeting_hpRNA_glial_mHTT	8.34557	speed
6	12	Non_targeting_hpRNA_glial_mHTT	7.48858	speed
7	1	Non_targeting_hpRNA_glial_mHTT	5.15296	speed
7	2	Non_targeting_hpRNA_glial_mHTT	5.49355	speed
7	3	Non_targeting_hpRNA_glial_mHTT	7.10943	speed
7	4	Non_targeting_hpRNA_glial_mHTT	5.08651	speed
7	5	Non_targeting_hpRNA_glial_mHTT	8.03852	speed
7	6	Non_targeting_hpRNA_glial_mHTT	6.71318	speed
7	7	Non_targeting_hpRNA_glial_mHTT	5.39868	speed
7	8	Non_targeting_hpRNA_glial_mHTT	4.13079	speed
7	9	Non_targeting_hpRNA_glial_mHTT	3.83695	speed
7	10	Non_targeting_hpRNA_glial_mHTT	6.06921	speed
7	11	Non_targeting_hpRNA_glial_mHTT	7.01544	speed
7	12	Non_targeting_hpRNA_glial_mHTT	6.54443	speed
8	1	Non_targeting_hpRNA_glial_mHTT	5.22323	speed
8	2	Non_targeting_hpRNA_glial_mHTT	3.29092	speed
8	3	Non_targeting_hpRNA_glial_mHTT	5.70368	speed
8	4	Non_targeting_hpRNA_glial_mHTT	5.34644	speed
8	5	Non_targeting_hpRNA_glial_mHTT	6.39656	speed
8	6	Non_targeting_hpRNA_glial_mHTT	5.25645	speed
8	7	Non_targeting_hpRNA_glial_mHTT	5.47871	speed
8	8	Non_targeting_hpRNA_glial_mHTT	4.48981	speed
8	9	Non_targeting_hpRNA_glial_mHTT	4.60025	speed
8	10	Non_targeting_hpRNA_glial_mHTT	4.43493	speed
8	11	Non_targeting_hpRNA_glial_mHTT	6.15956	speed
8	12	Non_targeting_hpRNA_glial_mHTT	5.21209	speed
9	1	Non_targeting_hpRNA_glial_mHTT	3.84217	speed
9	2	Non_targeting_hpRNA_glial_mHTT	3.05963	speed
9	3	Non_targeting_hpRNA_glial_mHTT	5.53149	speed
9	4	Non_targeting_hpRNA_glial_mHTT	5.33735	speed
10	5	Non_targeting_hpRNA_glial_mHTT	2.05354	speed
10	6	Non_targeting_hpRNA_glial_mHTT	3.24662	speed
10	7	Non_targeting_hpRNA_glial_mHTT	4.79695	speed
10	8	Non_targeting_hpRNA_glial_mHTT	3.17863	speed
10	9	Non_targeting_hpRNA_glial_mHTT	4.60528	speed
10	12	Non_targeting_hpRNA_glial_mHTT	3.62806	speed
1	1	sytbeta_106559_glial_mHTT	11.5365	speed
1	2	sytbeta_106559_glial_mHTT	10.9187	speed
2	1	sytbeta_106559_glial_mHTT	13.0762	speed
2	2	sytbeta_106559_glial_mHTT	11.6808	speed
3	1	sytbeta_106559_glial_mHTT	13.6677	speed
3	2	sytbeta_106559_glial_mHTT	12.0843	speed
4	1	sytbeta_106559_glial_mHTT	11.9869	speed
4	2	sytbeta_106559_glial_mHTT	11.9363	speed
5	1	sytbeta_106559_glial_mHTT	10.9581	speed
5	2	sytbeta_106559_glial_mHTT	10.003	speed
6	1	sytbeta_106559_glial_mHTT	10.243	speed
6	2	sytbeta_106559_glial_mHTT	11.1426	speed
7	1	sytbeta_106559_glial_mHTT	10.3359	speed
7	2	sytbeta_106559_glial_mHTT	10.2199	speed
8	1	sytbeta_106559_glial_mHTT	8.74587	speed
8	2	sytbeta_106559_glial_mHTT	9.02814	speed
10	1	sytbeta_106559_glial_mHTT	6.49455	speed
10	2	sytbeta_106559_glial_mHTT	1.52459	speed

## Sheet: GRM1 (mGluR, NIG 11144R-3)
Trialday	Replicate	Genotype	Observation	Metric
2	1	siHTT_glial_mHTT	14.006	speed
2	3	siHTT_glial_mHTT	14.5561	speed
2	4	siHTT_glial_mHTT	15.1897	speed
3	1	siHTT_glial_mHTT	13.3768	speed
3	3	siHTT_glial_mHTT	13.4293	speed
3	4	siHTT_glial_mHTT	14.6254	speed
4	1	siHTT_glial_mHTT	12.4724	speed
4	3	siHTT_glial_mHTT	14.5477	speed
4	4	siHTT_glial_mHTT	14.158	speed
7	1	siHTT_glial_mHTT	10.6072	speed
7	3	siHTT_glial_mHTT	12.2601	speed
7	4	siHTT_glial_mHTT	12.7026	speed
8	1	siHTT_glial_mHTT	10.8055	speed
8	3	siHTT_glial_mHTT	12.5638	speed
8	4	siHTT_glial_mHTT	13.1883	speed
9	1	siHTT_glial_mHTT	11.0816	speed
9	3	siHTT_glial_mHTT	10.1717	speed
9	4	siHTT_glial_mHTT	11.8209	speed
10	1	siHTT_glial_mHTT	10.8957	speed
10	3	siHTT_glial_mHTT	10.1492	speed
10	4	siHTT_glial_mHTT	12.0736	speed
11	1	siHTT_glial_mHTT	11.3331	speed
11	3	siHTT_glial_mHTT	11.8542	speed
11	4	siHTT_glial_mHTT	13.2061	speed
14	1	siHTT_glial_mHTT	9.41228	speed
14	3	siHTT_glial_mHTT	9.23035	speed
14	4	siHTT_glial_mHTT	9.67787	speed
2	5	siHTT_glial_mHTT	14.5977	speed
2	6	siHTT_glial_mHTT	12.4736	speed
3	5	siHTT_glial_mHTT	15.6722	speed
3	6	siHTT_glial_mHTT	14.2076	speed
4	5	siHTT_glial_mHTT	13.7775	speed
4	6	siHTT_glial_mHTT	14.2843	speed
7	5	siHTT_glial_mHTT	11.0677	speed
7	6	siHTT_glial_mHTT	11.6911	speed
8	5	siHTT_glial_mHTT	11.5855	speed
8	6	siHTT_glial_mHTT	11.3266	speed
9	5	siHTT_glial_mHTT	11.1373	speed
9	6	siHTT_glial_mHTT	10.8797	speed
10	5	siHTT_glial_mHTT	11.7288	speed
10	6	siHTT_glial_mHTT	11.6774	speed
11	5	siHTT_glial_mHTT	10.8967	speed
11	6	siHTT_glial_mHTT	11.8259	speed
14	5	siHTT_glial_mHTT	8.06043	speed
14	6	siHTT_glial_mHTT	10.8951	speed
2	1	Non_targeting_hpRNA_glial_mHTT	13.046	speed
2	2	Non_targeting_hpRNA_glial_mHTT	13.7808	speed
2	3	Non_targeting_hpRNA_glial_mHTT	13.0368	speed
2	4	Non_targeting_hpRNA_glial_mHTT	12.6584	speed
3	1	Non_targeting_hpRNA_glial_mHTT	11.0322	speed
3	2	Non_targeting_hpRNA_glial_mHTT	11.2395	speed
3	3	Non_targeting_hpRNA_glial_mHTT	11.9005	speed
3	4	Non_targeting_hpRNA_glial_mHTT	11.433	speed
4	1	Non_targeting_hpRNA_glial_mHTT	11.725	speed
4	2	Non_targeting_hpRNA_glial_mHTT	9.68596	speed
4	3	Non_targeting_hpRNA_glial_mHTT	11.1434	speed
4	4	Non_targeting_hpRNA_glial_mHTT	9.4276	speed
7	1	Non_targeting_hpRNA_glial_mHTT	3.50041	speed
7	2	Non_targeting_hpRNA_glial_mHTT	7.25833	speed
7	3	Non_targeting_hpRNA_glial_mHTT	7.60444	speed
7	4	Non_targeting_hpRNA_glial_mHTT	6.38378	speed
8	1	Non_targeting_hpRNA_glial_mHTT	6.15548	speed
8	2	Non_targeting_hpRNA_glial_mHTT	5.3172	speed
8	3	Non_targeting_hpRNA_glial_mHTT	7.45883	speed
8	4	Non_targeting_hpRNA_glial_mHTT	6.55713	speed
9	1	Non_targeting_hpRNA_glial_mHTT	5.12484	speed
9	2	Non_targeting_hpRNA_glial_mHTT	5.42699	speed
9	3	Non_targeting_hpRNA_glial_mHTT	4.26689	speed
9	4	Non_targeting_hpRNA_glial_mHTT	6.98812	speed
10	1	Non_targeting_hpRNA_glial_mHTT	2.81517	speed
10	2	Non_targeting_hpRNA_glial_mHTT	4.02774	speed
10	3	Non_targeting_hpRNA_glial_mHTT	6.83106	speed
10	4	Non_targeting_hpRNA_glial_mHTT	4.04518	speed
11	1	Non_targeting_hpRNA_glial_mHTT	2.01966	speed
11	2	Non_targeting_hpRNA_glial_mHTT		speed
11	3	Non_targeting_hpRNA_glial_mHTT	6.5789	speed
11	4	Non_targeting_hpRNA_glial_mHTT	3.9963	speed
14	1	Non_targeting_hpRNA_glial_mHTT		speed
14	2	Non_targeting_hpRNA_glial_mHTT	0.940851	speed
14	3	Non_targeting_hpRNA_glial_mHTT	4.32252	speed
14	4	Non_targeting_hpRNA_glial_mHTT		speed
2	5	Non_targeting_hpRNA_glial_mHTT	12.6262	speed
2	6	Non_targeting_hpRNA_glial_mHTT	10.3089	speed
2	7	Non_targeting_hpRNA_glial_mHTT	12.2525	speed
3	5	Non_targeting_hpRNA_glial_mHTT	12.7313	speed
3	6	Non_targeting_hpRNA_glial_mHTT	13.1677	speed
3	7	Non_targeting_hpRNA_glial_mHTT	11.8044	speed
4	5	Non_targeting_hpRNA_glial_mHTT	12.3082	speed
4	6	Non_targeting_hpRNA_glial_mHTT	11.6515	speed
4	7	Non_targeting_hpRNA_glial_mHTT	12.2317	speed
7	5	Non_targeting_hpRNA_glial_mHTT	6.58931	speed
7	6	Non_targeting_hpRNA_glial_mHTT	7.04415	speed
7	7	Non_targeting_hpRNA_glial_mHTT	9.06544	speed
8	5	Non_targeting_hpRNA_glial_mHTT	8.06133	speed
8	6	Non_targeting_hpRNA_glial_mHTT	8.01377	speed
8	7	Non_targeting_hpRNA_glial_mHTT	9.60868	speed
9	5	Non_targeting_hpRNA_glial_mHTT	6.23172	speed
9	6	Non_targeting_hpRNA_glial_mHTT	6.72943	speed
9	7	Non_targeting_hpRNA_glial_mHTT	9.95812	speed
10	5	Non_targeting_hpRNA_glial_mHTT	1.37137	speed
10	6	Non_targeting_hpRNA_glial_mHTT	4.89392	speed
10	7	Non_targeting_hpRNA_glial_mHTT	2.94847	speed
11	5	Non_targeting_hpRNA_glial_mHTT	2.50786	speed
11	6	Non_targeting_hpRNA_glial_mHTT	7.03274	speed
11	7	Non_targeting_hpRNA_glial_mHTT	6.72828	speed
14	5	Non_targeting_hpRNA_glial_mHTT		speed
14	6	Non_targeting_hpRNA_glial_mHTT	1.17814	speed
14	7	Non_targeting_hpRNA_glial_mHTT		speed
2	1	mGluR_11144R3_glial_mHTT	13.3268	speed
2	2	mGluR_11144R3_glial_mHTT	13.3472	speed
2	3	mGluR_11144R3_glial_mHTT	9.9867	speed
2	4	mGluR_11144R3_glial_mHTT	12.8912	speed
3	1	mGluR_11144R3_glial_mHTT	13.5682	speed
3	2	mGluR_11144R3_glial_mHTT	12.3993	speed
3	3	mGluR_11144R3_glial_mHTT	12.7906	speed
3	4	mGluR_11144R3_glial_mHTT	13.0161	speed
4	1	mGluR_11144R3_glial_mHTT	12.8376	speed
4	2	mGluR_11144R3_glial_mHTT	13.4818	speed
4	3	mGluR_11144R3_glial_mHTT	12.9582	speed
4	4	mGluR_11144R3_glial_mHTT	12.2702	speed
7	1	mGluR_11144R3_glial_mHTT	9.77596	speed
7	2	mGluR_11144R3_glial_mHTT	10.7673	speed
7	3	mGluR_11144R3_glial_mHTT	9.91065	speed
7	4	mGluR_11144R3_glial_mHTT	10.5214	speed
8	1	mGluR_11144R3_glial_mHTT	8.08784	speed
8	2	mGluR_11144R3_glial_mHTT	10.452	speed
8	3	mGluR_11144R3_glial_mHTT	10.669	speed
8	4	mGluR_11144R3_glial_mHTT	10.1118	speed
9	1	mGluR_11144R3_glial_mHTT	9.82102	speed
9	2	mGluR_11144R3_glial_mHTT	9.28374	speed
9	3	mGluR_11144R3_glial_mHTT	7.98097	speed
9	4	mGluR_11144R3_glial_mHTT	9.3858	speed
10	1	mGluR_11144R3_glial_mHTT	9.14698	speed
10	2	mGluR_11144R3_glial_mHTT	9.75975	speed
10	3	mGluR_11144R3_glial_mHTT	9.26445	speed
10	4	mGluR_11144R3_glial_mHTT	9.37795	speed
11	1	mGluR_11144R3_glial_mHTT	8.80125	speed
11	2	mGluR_11144R3_glial_mHTT	10.0103	speed
11	3	mGluR_11144R3_glial_mHTT	10.6057	speed
11	4	mGluR_11144R3_glial_mHTT	10.6724	speed
14	1	mGluR_11144R3_glial_mHTT	3.20212	speed
14	2	mGluR_11144R3_glial_mHTT	7.80783	speed
14	3	mGluR_11144R3_glial_mHTT	5.62446	speed
14	4	mGluR_11144R3_glial_mHTT	3.23952	speed
