# Supplementary material for: Downregulation of glial genes involved in synaptic function mitigates Huntington's disease pathogenesis
Source: eLife. 2021 Apr 19;10:e64564. doi: 10.7554/eLife.64564 (PMC8149125; doi:10.7554/eLife.64564)
Supplement: Figure 4—source data 1. [file elife-64564-fig4-data1.xlsx]

## Sheet: Both mHTT (nrx1, BDSC 61696)
Trialday	Replicate	Genotype	Observation	Metric
1	1	61696_elav_repo_NT	12.0811	speed
1	2	61696_elav_repo_NT	13.9826	speed
3	1	61696_elav_repo_NT	12.941	speed
3	2	61696_elav_repo_NT	13.7515	speed
4	1	61696_elav_repo_NT	10.9219	speed
4	2	61696_elav_repo_NT	13.6484	speed
5	1	61696_elav_repo_NT	9.96198	speed
5	2	61696_elav_repo_NT	11.1124	speed
6	1	61696_elav_repo_NT	7.53909	speed
6	2	61696_elav_repo_NT	9.86356	speed
7	1	61696_elav_repo_NT	7.66531	speed
7	2	61696_elav_repo_NT	8.46983	speed
8	1	61696_elav_repo_NT	5.93556	speed
8	2	61696_elav_repo_NT	7.96342	speed
10	1	61696_elav_repo_NT	5.32644	speed
10	2	61696_elav_repo_NT	7.00162	speed
1	3	61696_elav_repo_NT	14.0886	speed
2	3	61696_elav_repo_NT	14.9272	speed
3	3	61696_elav_repo_NT	13.8536	speed
4	3	61696_elav_repo_NT	12.304	speed
5	3	61696_elav_repo_NT	11.0259	speed
6	3	61696_elav_repo_NT	8.87184	speed
7	3	61696_elav_repo_NT	6.50683	speed
8	3	61696_elav_repo_NT	7.23312	speed
9	3	61696_elav_repo_NT	7.61752	speed
1	1	siHTT_neuronal_glial_mHTT_neuronal_glial_mHTT	12.2787	speed
3	1	siHTT_neuronal_glial_mHTT_neuronal_glial_mHTT	12.5076	speed
4	1	siHTT_neuronal_glial_mHTT_neuronal_glial_mHTT	13.3406	speed
5	1	siHTT_neuronal_glial_mHTT_neuronal_glial_mHTT	11.9504	speed
6	1	siHTT_neuronal_glial_mHTT_neuronal_glial_mHTT	12.1908	speed
7	1	siHTT_neuronal_glial_mHTT_neuronal_glial_mHTT	11.7322	speed
8	1	siHTT_neuronal_glial_mHTT_neuronal_glial_mHTT	11.0121	speed
10	1	siHTT_neuronal_glial_mHTT_neuronal_glial_mHTT	10.4858	speed
1	2	siHTT_neuronal_glial_mHTT_neuronal_glial_mHTT	12.8793	speed
3	2	siHTT_neuronal_glial_mHTT_neuronal_glial_mHTT	12.1785	speed
4	2	siHTT_neuronal_glial_mHTT_neuronal_glial_mHTT	12.9675	speed
5	2	siHTT_neuronal_glial_mHTT_neuronal_glial_mHTT	12.7904	speed
6	2	siHTT_neuronal_glial_mHTT_neuronal_glial_mHTT	11.4946	speed
7	2	siHTT_neuronal_glial_mHTT_neuronal_glial_mHTT	11.4024	speed
8	2	siHTT_neuronal_glial_mHTT_neuronal_glial_mHTT	11.0566	speed
10	2	siHTT_neuronal_glial_mHTT_neuronal_glial_mHTT	9.0189	speed
1	3	siHTT_neuronal_glial_mHTT_neuronal_glial_mHTT	11.6274	speed
3	3	siHTT_neuronal_glial_mHTT_neuronal_glial_mHTT	12.3483	speed
4	3	siHTT_neuronal_glial_mHTT_neuronal_glial_mHTT	13.0902	speed
5	3	siHTT_neuronal_glial_mHTT_neuronal_glial_mHTT	12.8269	speed
6	3	siHTT_neuronal_glial_mHTT_neuronal_glial_mHTT	11.2849	speed
7	3	siHTT_neuronal_glial_mHTT_neuronal_glial_mHTT	13.0223	speed
8	3	siHTT_neuronal_glial_mHTT_neuronal_glial_mHTT	10.1266	speed
10	3	siHTT_neuronal_glial_mHTT_neuronal_glial_mHTT	11.8044	speed
1	4	siHTT_neuronal_glial_mHTT_neuronal_glial_mHTT	11.1179	speed
2	4	siHTT_neuronal_glial_mHTT_neuronal_glial_mHTT	12.7894	speed
3	4	siHTT_neuronal_glial_mHTT_neuronal_glial_mHTT	13.4608	speed
4	4	siHTT_neuronal_glial_mHTT_neuronal_glial_mHTT	12.3913	speed
5	4	siHTT_neuronal_glial_mHTT_neuronal_glial_mHTT	13.2623	speed
6	4	siHTT_neuronal_glial_mHTT_neuronal_glial_mHTT	13.4956	speed
7	4	siHTT_neuronal_glial_mHTT_neuronal_glial_mHTT	12.389	speed
8	4	siHTT_neuronal_glial_mHTT_neuronal_glial_mHTT	12.4599	speed
9	4	siHTT_neuronal_glial_mHTT_neuronal_glial_mHTT	12.5042	speed
10	4	siHTT_neuronal_glial_mHTT_neuronal_glial_mHTT	13.4031	speed
1	5	siHTT_neuronal_glial_mHTT_neuronal_glial_mHTT	11.3765	speed
2	5	siHTT_neuronal_glial_mHTT_neuronal_glial_mHTT	11.813	speed
3	5	siHTT_neuronal_glial_mHTT_neuronal_glial_mHTT	12.0146	speed
4	5	siHTT_neuronal_glial_mHTT_neuronal_glial_mHTT	12.9165	speed
5	5	siHTT_neuronal_glial_mHTT_neuronal_glial_mHTT	11.9848	speed
6	5	siHTT_neuronal_glial_mHTT_neuronal_glial_mHTT	12.6152	speed
7	5	siHTT_neuronal_glial_mHTT_neuronal_glial_mHTT	10.6879	speed
8	5	siHTT_neuronal_glial_mHTT_neuronal_glial_mHTT	11.2122	speed
9	5	siHTT_neuronal_glial_mHTT_neuronal_glial_mHTT	10.6103	speed
10	5	siHTT_neuronal_glial_mHTT_neuronal_glial_mHTT	11.5721	speed
1	6	siHTT_neuronal_glial_mHTT_neuronal_glial_mHTT	11.7362	speed
2	6	siHTT_neuronal_glial_mHTT_neuronal_glial_mHTT	12.598	speed
3	6	siHTT_neuronal_glial_mHTT_neuronal_glial_mHTT	13.1219	speed
4	6	siHTT_neuronal_glial_mHTT_neuronal_glial_mHTT	13.6539	speed
5	6	siHTT_neuronal_glial_mHTT_neuronal_glial_mHTT	12.8782	speed
6	6	siHTT_neuronal_glial_mHTT_neuronal_glial_mHTT	13.0176	speed
7	6	siHTT_neuronal_glial_mHTT_neuronal_glial_mHTT	11.3785	speed
8	6	siHTT_neuronal_glial_mHTT_neuronal_glial_mHTT	11.5155	speed
9	6	siHTT_neuronal_glial_mHTT_neuronal_glial_mHTT	11.1271	speed
10	6	siHTT_neuronal_glial_mHTT_neuronal_glial_mHTT	12.0924	speed
1	7	siHTT_neuronal_glial_mHTT_neuronal_glial_mHTT	12.1086	speed
3	7	siHTT_neuronal_glial_mHTT_neuronal_glial_mHTT	12.0175	speed
4	7	siHTT_neuronal_glial_mHTT_neuronal_glial_mHTT	12.9588	speed
5	7	siHTT_neuronal_glial_mHTT_neuronal_glial_mHTT	11.3736	speed
6	7	siHTT_neuronal_glial_mHTT_neuronal_glial_mHTT	10.959	speed
7	7	siHTT_neuronal_glial_mHTT_neuronal_glial_mHTT	10.2637	speed
8	7	siHTT_neuronal_glial_mHTT_neuronal_glial_mHTT	10.0301	speed
9	7	siHTT_neuronal_glial_mHTT_neuronal_glial_mHTT	9.64031	speed
10	7	siHTT_neuronal_glial_mHTT_neuronal_glial_mHTT	10.3136	speed
1	8	siHTT_neuronal_glial_mHTT_neuronal_glial_mHTT	12.646	speed
3	8	siHTT_neuronal_glial_mHTT_neuronal_glial_mHTT	12.5373	speed
4	8	siHTT_neuronal_glial_mHTT_neuronal_glial_mHTT	10.0204	speed
5	8	siHTT_neuronal_glial_mHTT_neuronal_glial_mHTT	11.54	speed
6	8	siHTT_neuronal_glial_mHTT_neuronal_glial_mHTT	12.3352	speed
7	8	siHTT_neuronal_glial_mHTT_neuronal_glial_mHTT	10.7669	speed
8	8	siHTT_neuronal_glial_mHTT_neuronal_glial_mHTT	8.88182	speed
9	8	siHTT_neuronal_glial_mHTT_neuronal_glial_mHTT	10.9916	speed
10	8	siHTT_neuronal_glial_mHTT_neuronal_glial_mHTT	11.3501	speed
1	9	siHTT_neuronal_glial_mHTT_neuronal_glial_mHTT	12.2459	speed
2	9	siHTT_neuronal_glial_mHTT_neuronal_glial_mHTT	12.3805	speed
3	9	siHTT_neuronal_glial_mHTT_neuronal_glial_mHTT	12.261	speed
4	9	siHTT_neuronal_glial_mHTT_neuronal_glial_mHTT	11.9516	speed
5	9	siHTT_neuronal_glial_mHTT_neuronal_glial_mHTT	11.0894	speed
6	9	siHTT_neuronal_glial_mHTT_neuronal_glial_mHTT	11.2352	speed
7	9	siHTT_neuronal_glial_mHTT_neuronal_glial_mHTT	10.0953	speed
8	9	siHTT_neuronal_glial_mHTT_neuronal_glial_mHTT	8.62021	speed
9	9	siHTT_neuronal_glial_mHTT_neuronal_glial_mHTT	9.99235	speed
1	10	siHTT_neuronal_glial_mHTT_neuronal_glial_mHTT	12.2693	speed
2	10	siHTT_neuronal_glial_mHTT_neuronal_glial_mHTT	11.4573	speed
3	10	siHTT_neuronal_glial_mHTT_neuronal_glial_mHTT	12.6423	speed
4	10	siHTT_neuronal_glial_mHTT_neuronal_glial_mHTT	12.3143	speed
5	10	siHTT_neuronal_glial_mHTT_neuronal_glial_mHTT	11.055	speed
6	10	siHTT_neuronal_glial_mHTT_neuronal_glial_mHTT	10.7495	speed
7	10	siHTT_neuronal_glial_mHTT_neuronal_glial_mHTT	10.4356	speed
8	10	siHTT_neuronal_glial_mHTT_neuronal_glial_mHTT	9.93952	speed
9	10	siHTT_neuronal_glial_mHTT_neuronal_glial_mHTT	12.0026	speed
1	11	siHTT_neuronal_glial_mHTT_neuronal_glial_mHTT	12.8241	speed
2	11	siHTT_neuronal_glial_mHTT_neuronal_glial_mHTT	13.0712	speed
3	11	siHTT_neuronal_glial_mHTT_neuronal_glial_mHTT	13.9854	speed
4	11	siHTT_neuronal_glial_mHTT_neuronal_glial_mHTT	12.847	speed
5	11	siHTT_neuronal_glial_mHTT_neuronal_glial_mHTT	12.4258	speed
6	11	siHTT_neuronal_glial_mHTT_neuronal_glial_mHTT	11.2505	speed
7	11	siHTT_neuronal_glial_mHTT_neuronal_glial_mHTT	10.5146	speed
8	11	siHTT_neuronal_glial_mHTT_neuronal_glial_mHTT	11.6061	speed
9	11	siHTT_neuronal_glial_mHTT_neuronal_glial_mHTT	12.4761	speed
1	1	non_targeting_hpRNA_elav_repo_NT	13.4893	speed
2	1	non_targeting_hpRNA_elav_repo_NT	11.7209	speed
3	1	non_targeting_hpRNA_elav_repo_NT	13.0647	speed
4	1	non_targeting_hpRNA_elav_repo_NT	11.2553	speed
5	1	non_targeting_hpRNA_elav_repo_NT	10.5882	speed
6	1	non_targeting_hpRNA_elav_repo_NT	8.47771	speed
7	1	non_targeting_hpRNA_elav_repo_NT	5.13439	speed
8	1	non_targeting_hpRNA_elav_repo_NT	7.56117	speed
9	1	non_targeting_hpRNA_elav_repo_NT		speed
10	1	non_targeting_hpRNA_elav_repo_NT		speed
1	2	non_targeting_hpRNA_elav_repo_NT	9.33197	speed
1	3	non_targeting_hpRNA_elav_repo_NT	11.2318	speed
2	2	non_targeting_hpRNA_elav_repo_NT	8.73295	speed
2	3	non_targeting_hpRNA_elav_repo_NT	9.36737	speed
3	2	non_targeting_hpRNA_elav_repo_NT	8.23746	speed
3	3	non_targeting_hpRNA_elav_repo_NT	9.14091	speed
4	2	non_targeting_hpRNA_elav_repo_NT	7.81995	speed
4	3	non_targeting_hpRNA_elav_repo_NT	8.36639	speed
5	2	non_targeting_hpRNA_elav_repo_NT	6.70907	speed
5	3	non_targeting_hpRNA_elav_repo_NT	6.15803	speed
6	2	non_targeting_hpRNA_elav_repo_NT	5.89128	speed
6	3	non_targeting_hpRNA_elav_repo_NT	7.60652	speed
7	2	non_targeting_hpRNA_elav_repo_NT	3.89438	speed
7	3	non_targeting_hpRNA_elav_repo_NT	5.71921	speed
8	2	non_targeting_hpRNA_elav_repo_NT	3.92795	speed
8	3	non_targeting_hpRNA_elav_repo_NT	5.20582	speed
9	2	non_targeting_hpRNA_elav_repo_NT	4.81987	speed
9	3	non_targeting_hpRNA_elav_repo_NT	4.19088	speed
1	4	non_targeting_hpRNA_elav_repo_NT	12.6572	speed
2	4	non_targeting_hpRNA_elav_repo_NT	12.7542	speed
3	4	non_targeting_hpRNA_elav_repo_NT	12.1557	speed
4	4	non_targeting_hpRNA_elav_repo_NT	11.3481	speed
5	4	non_targeting_hpRNA_elav_repo_NT	10.6394	speed
6	4	non_targeting_hpRNA_elav_repo_NT	8.08123	speed
7	4	non_targeting_hpRNA_elav_repo_NT	6.96912	speed
8	4	non_targeting_hpRNA_elav_repo_NT	5.99274	speed
9	4	non_targeting_hpRNA_elav_repo_NT	6.60172	speed

## Sheet: Glial mHTT (nrx1, BDSC 61696)
Trialday	Replicate	Genotype	Observation	Metric
1	1	siHTT_neuronal_glial_mHTT	12.4426	speed
1	2	siHTT_neuronal_glial_mHTT	12.0774	speed
1	3	siHTT_neuronal_glial_mHTT	12.5857	speed
2	1	siHTT_neuronal_glial_mHTT	12.5465	speed
2	2	siHTT_neuronal_glial_mHTT	12.1366	speed
2	3	siHTT_neuronal_glial_mHTT	13.7777	speed
3	1	siHTT_neuronal_glial_mHTT	12.9217	speed
3	2	siHTT_neuronal_glial_mHTT	13.1451	speed
3	3	siHTT_neuronal_glial_mHTT	13.3934	speed
6	1	siHTT_neuronal_glial_mHTT	11.9027	speed
6	2	siHTT_neuronal_glial_mHTT	12.0279	speed
6	3	siHTT_neuronal_glial_mHTT	12.386	speed
7	1	siHTT_neuronal_glial_mHTT	13.1564	speed
7	2	siHTT_neuronal_glial_mHTT	12.1941	speed
7	3	siHTT_neuronal_glial_mHTT	12.6373	speed
8	1	siHTT_neuronal_glial_mHTT	12.5363	speed
8	2	siHTT_neuronal_glial_mHTT	10.8395	speed
8	3	siHTT_neuronal_glial_mHTT	11.6815	speed
9	1	siHTT_neuronal_glial_mHTT	13.4862	speed
9	2	siHTT_neuronal_glial_mHTT	11.1918	speed
9	3	siHTT_neuronal_glial_mHTT	7.93778	speed
10	1	siHTT_neuronal_glial_mHTT	12.7121	speed
10	2	siHTT_neuronal_glial_mHTT	11.0049	speed
10	3	siHTT_neuronal_glial_mHTT	11.6494	speed
1	4	siHTT_neuronal_glial_mHTT	12.7003	speed
1	5	siHTT_neuronal_glial_mHTT	12.3056	speed
2	4	siHTT_neuronal_glial_mHTT	12.9627	speed
2	5	siHTT_neuronal_glial_mHTT	12.8489	speed
3	4	siHTT_neuronal_glial_mHTT	13.0768	speed
3	5	siHTT_neuronal_glial_mHTT	13.2757	speed
4	4	siHTT_neuronal_glial_mHTT	13.3376	speed
4	5	siHTT_neuronal_glial_mHTT	13.9477	speed
7	4	siHTT_neuronal_glial_mHTT	11.0825	speed
7	5	siHTT_neuronal_glial_mHTT	12.4794	speed
8	4	siHTT_neuronal_glial_mHTT	10.7777	speed
8	5	siHTT_neuronal_glial_mHTT	11.6978	speed
9	4	siHTT_neuronal_glial_mHTT	11.6872	speed
9	5	siHTT_neuronal_glial_mHTT	12.1707	speed
10	4	siHTT_neuronal_glial_mHTT	11.8603	speed
10	5	siHTT_neuronal_glial_mHTT	12.2677	speed
11	4	siHTT_neuronal_glial_mHTT	11.7954	speed
11	5	siHTT_neuronal_glial_mHTT	11.3181	speed
1	6	siHTT_neuronal_glial_mHTT	12.8711	speed
1	7	siHTT_neuronal_glial_mHTT	12.0181	speed
1	8	siHTT_neuronal_glial_mHTT	13.6351	speed
1	9	siHTT_neuronal_glial_mHTT	13.3056	speed
2	6	siHTT_neuronal_glial_mHTT	13.0278	speed
2	7	siHTT_neuronal_glial_mHTT	12.1543	speed
2	8	siHTT_neuronal_glial_mHTT	12.605	speed
2	9	siHTT_neuronal_glial_mHTT	12.6082	speed
3	6	siHTT_neuronal_glial_mHTT	12.644	speed
3	7	siHTT_neuronal_glial_mHTT	11.314	speed
3	8	siHTT_neuronal_glial_mHTT	13.0425	speed
3	9	siHTT_neuronal_glial_mHTT	13.7703	speed
4	6	siHTT_neuronal_glial_mHTT	7.66824	speed
4	7	siHTT_neuronal_glial_mHTT	11.8627	speed
4	8	siHTT_neuronal_glial_mHTT	13.0169	speed
4	9	siHTT_neuronal_glial_mHTT	13.2484	speed
7	6	siHTT_neuronal_glial_mHTT	12.1263	speed
7	7	siHTT_neuronal_glial_mHTT	10.2514	speed
7	8	siHTT_neuronal_glial_mHTT	10.9977	speed
7	9	siHTT_neuronal_glial_mHTT	11.8206	speed
8	6	siHTT_neuronal_glial_mHTT	11.6905	speed
8	7	siHTT_neuronal_glial_mHTT	11.6208	speed
8	8	siHTT_neuronal_glial_mHTT	12.3794	speed
8	9	siHTT_neuronal_glial_mHTT	13.0795	speed
9	6	siHTT_neuronal_glial_mHTT	13.1206	speed
9	7	siHTT_neuronal_glial_mHTT	10.6646	speed
9	8	siHTT_neuronal_glial_mHTT	11.4662	speed
9	9	siHTT_neuronal_glial_mHTT	11.9338	speed
10	6	siHTT_neuronal_glial_mHTT	11.8718	speed
10	7	siHTT_neuronal_glial_mHTT	12.132	speed
10	8	siHTT_neuronal_glial_mHTT	12.1053	speed
10	9	siHTT_neuronal_glial_mHTT	12.6571	speed
11	6	siHTT_neuronal_glial_mHTT	11.1697	speed
11	7	siHTT_neuronal_glial_mHTT	10.3344	speed
11	8	siHTT_neuronal_glial_mHTT	11.644	speed
11	9	siHTT_neuronal_glial_mHTT	11.9658	speed
1	1	non_targeting_hpRNA_repo_NT	11.8937	speed
1	2	non_targeting_hpRNA_repo_NT	10.4565	speed
1	3	non_targeting_hpRNA_repo_NT	10.4972	speed
2	1	non_targeting_hpRNA_repo_NT	12.1318	speed
2	2	non_targeting_hpRNA_repo_NT	10.1373	speed
2	3	non_targeting_hpRNA_repo_NT	10.3372	speed
3	1	non_targeting_hpRNA_repo_NT	10.1646	speed
3	2	non_targeting_hpRNA_repo_NT	10.7509	speed
3	3	non_targeting_hpRNA_repo_NT	8.30352	speed
6	1	non_targeting_hpRNA_repo_NT	8.27819	speed
6	2	non_targeting_hpRNA_repo_NT	8.92224	speed
6	3	non_targeting_hpRNA_repo_NT	10.0095	speed
7	1	non_targeting_hpRNA_repo_NT	9.62615	speed
7	2	non_targeting_hpRNA_repo_NT	8.94112	speed
7	3	non_targeting_hpRNA_repo_NT	8.94874	speed
8	1	non_targeting_hpRNA_repo_NT	6.74805	speed
8	2	non_targeting_hpRNA_repo_NT	7.08568	speed
8	3	non_targeting_hpRNA_repo_NT	4.15005	speed
9	1	non_targeting_hpRNA_repo_NT	5.72649	speed
9	2	non_targeting_hpRNA_repo_NT		speed
9	3	non_targeting_hpRNA_repo_NT	9.65513	speed
10	1	non_targeting_hpRNA_repo_NT	5.52852	speed
10	2	non_targeting_hpRNA_repo_NT		speed
10	3	non_targeting_hpRNA_repo_NT	9.79143	speed
1	4	non_targeting_hpRNA_repo_NT	11.5727	speed
1	5	non_targeting_hpRNA_repo_NT	13.2315	speed
2	4	non_targeting_hpRNA_repo_NT	11.4092	speed
2	5	non_targeting_hpRNA_repo_NT	12.4249	speed
3	4	non_targeting_hpRNA_repo_NT	11.3621	speed
3	5	non_targeting_hpRNA_repo_NT	12.1417	speed
4	4	non_targeting_hpRNA_repo_NT	9.78109	speed
4	5	non_targeting_hpRNA_repo_NT	10.8012	speed
7	4	non_targeting_hpRNA_repo_NT	1.33331	speed
7	5	non_targeting_hpRNA_repo_NT	1.09364	speed
8	4	non_targeting_hpRNA_repo_NT	7.00787	speed
8	5	non_targeting_hpRNA_repo_NT	9.2764	speed
9	4	non_targeting_hpRNA_repo_NT	6.80368	speed
9	5	non_targeting_hpRNA_repo_NT	5.974	speed
10	4	non_targeting_hpRNA_repo_NT	6.11884	speed
10	5	non_targeting_hpRNA_repo_NT	6.21553	speed
11	4	non_targeting_hpRNA_repo_NT		speed
11	5	non_targeting_hpRNA_repo_NT		speed
1	6	non_targeting_hpRNA_repo_NT	12.9906	speed
1	7	non_targeting_hpRNA_repo_NT	12.4928	speed
1	8	non_targeting_hpRNA_repo_NT	13.219	speed
1	9	non_targeting_hpRNA_repo_NT	12.4012	speed
2	6	non_targeting_hpRNA_repo_NT	12.5081	speed
2	7	non_targeting_hpRNA_repo_NT	11.3248	speed
2	8	non_targeting_hpRNA_repo_NT	12.7322	speed
2	9	non_targeting_hpRNA_repo_NT	11.6784	speed
3	6	non_targeting_hpRNA_repo_NT	10.4115	speed
3	7	non_targeting_hpRNA_repo_NT	10.2338	speed
3	8	non_targeting_hpRNA_repo_NT	10.9024	speed
3	9	non_targeting_hpRNA_repo_NT	12.5179	speed
4	6	non_targeting_hpRNA_repo_NT	9.32458	speed
4	7	non_targeting_hpRNA_repo_NT	10.794	speed
4	8	non_targeting_hpRNA_repo_NT	6.46088	speed
4	9	non_targeting_hpRNA_repo_NT	10.8661	speed
7	6	non_targeting_hpRNA_repo_NT	8.76149	speed
7	7	non_targeting_hpRNA_repo_NT	7.41454	speed
7	8	non_targeting_hpRNA_repo_NT	7.34076	speed
7	9	non_targeting_hpRNA_repo_NT		speed
8	6	non_targeting_hpRNA_repo_NT		speed
8	7	non_targeting_hpRNA_repo_NT	7.09727	speed
8	8	non_targeting_hpRNA_repo_NT	0.779074	speed
8	9	non_targeting_hpRNA_repo_NT		speed
9	6	non_targeting_hpRNA_repo_NT		speed
9	7	non_targeting_hpRNA_repo_NT	4.41274	speed
9	8	non_targeting_hpRNA_repo_NT		speed
9	9	non_targeting_hpRNA_repo_NT		speed
10	6	non_targeting_hpRNA_repo_NT		speed
10	7	non_targeting_hpRNA_repo_NT	4.7862	speed
10	8	non_targeting_hpRNA_repo_NT		speed
10	9	non_targeting_hpRNA_repo_NT		speed
11	6	non_targeting_hpRNA_repo_NT		speed
11	7	non_targeting_hpRNA_repo_NT	5.04079	speed
11	8	non_targeting_hpRNA_repo_NT		speed
11	9	non_targeting_hpRNA_repo_NT		speed
1	1	nrx1_61696_glial_mHTT	13.7089	speed
1	2	nrx1_61696_glial_mHTT	13.2991	speed
1	3	nrx1_61696_glial_mHTT	12.2365	speed
1	4	nrx1_61696_glial_mHTT	12.5563	speed
2	1	nrx1_61696_glial_mHTT	13.7161	speed
2	2	nrx1_61696_glial_mHTT	13.4852	speed
2	3	nrx1_61696_glial_mHTT	13.2839	speed
2	4	nrx1_61696_glial_mHTT	12.3817	speed
3	1	nrx1_61696_glial_mHTT	12.6901	speed
3	2	nrx1_61696_glial_mHTT	12.3624	speed
3	3	nrx1_61696_glial_mHTT	13.0688	speed
3	4	nrx1_61696_glial_mHTT	12.2946	speed
4	1	nrx1_61696_glial_mHTT	12.6457	speed
4	2	nrx1_61696_glial_mHTT	13.2191	speed
4	3	nrx1_61696_glial_mHTT	13.0364	speed
4	4	nrx1_61696_glial_mHTT	12.8281	speed
7	1	nrx1_61696_glial_mHTT	9.28246	speed
7	2	nrx1_61696_glial_mHTT	10.4115	speed
7	3	nrx1_61696_glial_mHTT	9.80649	speed
7	4	nrx1_61696_glial_mHTT	5.79076	speed
8	1	nrx1_61696_glial_mHTT	6.1702	speed
8	2	nrx1_61696_glial_mHTT	10.4911	speed
8	3	nrx1_61696_glial_mHTT	7.63761	speed
8	4	nrx1_61696_glial_mHTT	10.7069	speed
9	1	nrx1_61696_glial_mHTT	10.5376	speed
9	2	nrx1_61696_glial_mHTT	8.94942	speed
9	3	nrx1_61696_glial_mHTT	10.2125	speed
9	4	nrx1_61696_glial_mHTT	10.466	speed
10	1	nrx1_61696_glial_mHTT	10.3486	speed
10	2	nrx1_61696_glial_mHTT	8.24324	speed
10	3	nrx1_61696_glial_mHTT	9.07066	speed
10	4	nrx1_61696_glial_mHTT	8.99459	speed
11	1	nrx1_61696_glial_mHTT	11.1033	speed
11	2	nrx1_61696_glial_mHTT	6.84569	speed
11	3	nrx1_61696_glial_mHTT	8.1443	speed
11	4	nrx1_61696_glial_mHTT	7.54874	speed

## Sheet: Neuron mHTT (nrx1, BDSC 61696)
Trialday	Replicate	Genotype	Observation	Metric
1	1	siHTT_neuronal_glial_mHTT	12.9738	speed
1	2	siHTT_neuronal_glial_mHTT	11.0262	speed
1	3	siHTT_neuronal_glial_mHTT	12.3275	speed
2	1	siHTT_neuronal_glial_mHTT	12.5354	speed
2	2	siHTT_neuronal_glial_mHTT	10.0117	speed
2	3	siHTT_neuronal_glial_mHTT	7.24162	speed
3	1	siHTT_neuronal_glial_mHTT	12.1997	speed
3	2	siHTT_neuronal_glial_mHTT	10.9724	speed
3	3	siHTT_neuronal_glial_mHTT	11.9451	speed
6	1	siHTT_neuronal_glial_mHTT	10.4446	speed
6	2	siHTT_neuronal_glial_mHTT	5.85985	speed
6	3	siHTT_neuronal_glial_mHTT	10.8258	speed
7	1	siHTT_neuronal_glial_mHTT	11.3678	speed
7	2	siHTT_neuronal_glial_mHTT	10.7948	speed
7	3	siHTT_neuronal_glial_mHTT	11.5378	speed
8	1	siHTT_neuronal_glial_mHTT	8.40404	speed
8	2	siHTT_neuronal_glial_mHTT	7.72073	speed
8	3	siHTT_neuronal_glial_mHTT	9.33212	speed
9	1	siHTT_neuronal_glial_mHTT	10.0512	speed
9	2	siHTT_neuronal_glial_mHTT	10.0238	speed
9	3	siHTT_neuronal_glial_mHTT	10.192	speed
10	1	siHTT_neuronal_glial_mHTT	10.6898	speed
10	2	siHTT_neuronal_glial_mHTT	9.77605	speed
10	3	siHTT_neuronal_glial_mHTT	4.79401	speed
1	4	siHTT_neuronal_glial_mHTT	10.5471	speed
1	5	siHTT_neuronal_glial_mHTT	12.6819	speed
2	4	siHTT_neuronal_glial_mHTT	11.8272	speed
2	5	siHTT_neuronal_glial_mHTT	12.1995	speed
3	4	siHTT_neuronal_glial_mHTT	13.2249	speed
3	5	siHTT_neuronal_glial_mHTT	13.095	speed
4	4	siHTT_neuronal_glial_mHTT	11.944	speed
4	5	siHTT_neuronal_glial_mHTT	12.2127	speed
7	4	siHTT_neuronal_glial_mHTT	10.3001	speed
7	5	siHTT_neuronal_glial_mHTT	10.4382	speed
8	4	siHTT_neuronal_glial_mHTT	10.5741	speed
8	5	siHTT_neuronal_glial_mHTT	10.4287	speed
9	4	siHTT_neuronal_glial_mHTT	10.8609	speed
9	5	siHTT_neuronal_glial_mHTT	11.3644	speed
10	4	siHTT_neuronal_glial_mHTT	10.5794	speed
10	5	siHTT_neuronal_glial_mHTT	10.6537	speed
11	4	siHTT_neuronal_glial_mHTT	10.3471	speed
11	5	siHTT_neuronal_glial_mHTT	10.0855	speed
1	6	siHTT_neuronal_glial_mHTT	11.0377	speed
1	7	siHTT_neuronal_glial_mHTT	11.7819	speed
1	8	siHTT_neuronal_glial_mHTT	12.3913	speed
1	9	siHTT_neuronal_glial_mHTT	11.9684	speed
2	6	siHTT_neuronal_glial_mHTT	12.9041	speed
2	7	siHTT_neuronal_glial_mHTT	12.7564	speed
2	8	siHTT_neuronal_glial_mHTT	11.8781	speed
2	9	siHTT_neuronal_glial_mHTT	12.8016	speed
3	6	siHTT_neuronal_glial_mHTT	12.0844	speed
3	7	siHTT_neuronal_glial_mHTT	11.3574	speed
3	8	siHTT_neuronal_glial_mHTT	11.0318	speed
3	9	siHTT_neuronal_glial_mHTT	11.1875	speed
4	6	siHTT_neuronal_glial_mHTT	11.8194	speed
4	7	siHTT_neuronal_glial_mHTT	13.0968	speed
4	8	siHTT_neuronal_glial_mHTT	8.84191	speed
4	9	siHTT_neuronal_glial_mHTT	12.3707	speed
7	6	siHTT_neuronal_glial_mHTT	10.6142	speed
7	7	siHTT_neuronal_glial_mHTT	10.7588	speed
7	8	siHTT_neuronal_glial_mHTT	10.3876	speed
7	9	siHTT_neuronal_glial_mHTT	10.883	speed
8	6	siHTT_neuronal_glial_mHTT	9.36248	speed
8	7	siHTT_neuronal_glial_mHTT	11.3096	speed
8	8	siHTT_neuronal_glial_mHTT	12.1104	speed
8	9	siHTT_neuronal_glial_mHTT	10.5337	speed
9	6	siHTT_neuronal_glial_mHTT	9.86367	speed
9	7	siHTT_neuronal_glial_mHTT	10.6371	speed
9	8	siHTT_neuronal_glial_mHTT	11.0621	speed
9	9	siHTT_neuronal_glial_mHTT	9.0022	speed
10	6	siHTT_neuronal_glial_mHTT	8.7987	speed
10	7	siHTT_neuronal_glial_mHTT	10.4649	speed
10	8	siHTT_neuronal_glial_mHTT	10.429	speed
10	9	siHTT_neuronal_glial_mHTT	10.6531	speed
11	6	siHTT_neuronal_glial_mHTT	10.6209	speed
11	7	siHTT_neuronal_glial_mHTT	8.98766	speed
11	8	siHTT_neuronal_glial_mHTT	10.9466	speed
11	9	siHTT_neuronal_glial_mHTT	10.0857	speed
1	1	non_targeting_hpRNA_neuronal_mHTT	12.6891	speed
1	2	non_targeting_hpRNA_neuronal_mHTT	12.789	speed
1	3	non_targeting_hpRNA_neuronal_mHTT	12.2203	speed
2	1	non_targeting_hpRNA_neuronal_mHTT	11.9169	speed
2	2	non_targeting_hpRNA_neuronal_mHTT	12.713	speed
2	3	non_targeting_hpRNA_neuronal_mHTT	8.9402	speed
3	1	non_targeting_hpRNA_neuronal_mHTT	11.1913	speed
3	2	non_targeting_hpRNA_neuronal_mHTT	12.0564	speed
3	3	non_targeting_hpRNA_neuronal_mHTT	10.7648	speed
6	1	non_targeting_hpRNA_neuronal_mHTT	6.7102	speed
6	2	non_targeting_hpRNA_neuronal_mHTT	6.72627	speed
6	3	non_targeting_hpRNA_neuronal_mHTT	8.25747	speed
7	1	non_targeting_hpRNA_neuronal_mHTT	5.24919	speed
7	2	non_targeting_hpRNA_neuronal_mHTT	4.5422	speed
7	3	non_targeting_hpRNA_neuronal_mHTT	6.66367	speed
8	1	non_targeting_hpRNA_neuronal_mHTT	4.91394	speed
8	2	non_targeting_hpRNA_neuronal_mHTT	3.62165	speed
8	3	non_targeting_hpRNA_neuronal_mHTT	5.12802	speed
9	1	non_targeting_hpRNA_neuronal_mHTT	3.0854	speed
9	2	non_targeting_hpRNA_neuronal_mHTT	2.74112	speed
9	3	non_targeting_hpRNA_neuronal_mHTT	3.50133	speed
10	1	non_targeting_hpRNA_neuronal_mHTT	2.78736	speed
10	2	non_targeting_hpRNA_neuronal_mHTT	3.47735	speed
10	3	non_targeting_hpRNA_neuronal_mHTT	3.6206	speed
1	4	non_targeting_hpRNA_neuronal_mHTT	10.2042	speed
1	5	non_targeting_hpRNA_neuronal_mHTT	11.7458	speed
2	4	non_targeting_hpRNA_neuronal_mHTT	10.5493	speed
2	5	non_targeting_hpRNA_neuronal_mHTT	12.4433	speed
3	4	non_targeting_hpRNA_neuronal_mHTT	10.4982	speed
3	5	non_targeting_hpRNA_neuronal_mHTT	12.3484	speed
4	4	non_targeting_hpRNA_neuronal_mHTT	8.77038	speed
4	5	non_targeting_hpRNA_neuronal_mHTT	10.0869	speed
7	4	non_targeting_hpRNA_neuronal_mHTT	4.13622	speed
7	5	non_targeting_hpRNA_neuronal_mHTT	6.17406	speed
8	4	non_targeting_hpRNA_neuronal_mHTT	4.53527	speed
8	5	non_targeting_hpRNA_neuronal_mHTT	4.90131	speed
9	4	non_targeting_hpRNA_neuronal_mHTT	3.04906	speed
9	5	non_targeting_hpRNA_neuronal_mHTT	3.37108	speed
10	4	non_targeting_hpRNA_neuronal_mHTT	2.60215	speed
10	5	non_targeting_hpRNA_neuronal_mHTT	3.37438	speed
11	4	non_targeting_hpRNA_neuronal_mHTT	2.75007	speed
11	5	non_targeting_hpRNA_neuronal_mHTT	3.36312	speed
1	6	non_targeting_hpRNA_neuronal_mHTT	12.5201	speed
1	7	non_targeting_hpRNA_neuronal_mHTT	12.8404	speed
1	8	non_targeting_hpRNA_neuronal_mHTT	12.0634	speed
1	9	non_targeting_hpRNA_neuronal_mHTT	12.3108	speed
2	6	non_targeting_hpRNA_neuronal_mHTT	11.7949	speed
2	7	non_targeting_hpRNA_neuronal_mHTT	11.9738	speed
2	8	non_targeting_hpRNA_neuronal_mHTT	11.6396	speed
2	9	non_targeting_hpRNA_neuronal_mHTT	11.9298	speed
3	6	non_targeting_hpRNA_neuronal_mHTT	10.0045	speed
3	7	non_targeting_hpRNA_neuronal_mHTT	9.87142	speed
3	8	non_targeting_hpRNA_neuronal_mHTT	10.9704	speed
3	9	non_targeting_hpRNA_neuronal_mHTT	11.4834	speed
4	6	non_targeting_hpRNA_neuronal_mHTT	5.83826	speed
4	7	non_targeting_hpRNA_neuronal_mHTT	9.6854	speed
4	8	non_targeting_hpRNA_neuronal_mHTT	9.8305	speed
4	9	non_targeting_hpRNA_neuronal_mHTT	9.07419	speed
7	6	non_targeting_hpRNA_neuronal_mHTT	4.96584	speed
7	7	non_targeting_hpRNA_neuronal_mHTT	4.70782	speed
7	8	non_targeting_hpRNA_neuronal_mHTT	5.05167	speed
7	9	non_targeting_hpRNA_neuronal_mHTT	5.40963	speed
8	6	non_targeting_hpRNA_neuronal_mHTT	4.39529	speed
8	7	non_targeting_hpRNA_neuronal_mHTT	3.94032	speed
8	8	non_targeting_hpRNA_neuronal_mHTT	4.90352	speed
8	9	non_targeting_hpRNA_neuronal_mHTT	5.10011	speed
9	6	non_targeting_hpRNA_neuronal_mHTT	3.02577	speed
9	7	non_targeting_hpRNA_neuronal_mHTT	3.01796	speed
9	8	non_targeting_hpRNA_neuronal_mHTT	2.93257	speed
9	9	non_targeting_hpRNA_neuronal_mHTT	3.77826	speed
10	6	non_targeting_hpRNA_neuronal_mHTT	3.36393	speed
10	7	non_targeting_hpRNA_neuronal_mHTT	3.00432	speed
10	8	non_targeting_hpRNA_neuronal_mHTT	2.58389	speed
10	9	non_targeting_hpRNA_neuronal_mHTT	3.4865	speed
11	6	non_targeting_hpRNA_neuronal_mHTT	3.161	speed
11	7	non_targeting_hpRNA_neuronal_mHTT	2.49853	speed
11	8	non_targeting_hpRNA_neuronal_mHTT	2.53104	speed
11	9	non_targeting_hpRNA_neuronal_mHTT	2.87363	speed
1	1	nrx1_61696_neuronal_mHTT	12.0612	speed
1	2	nrx1_61696_neuronal_mHTT	13.1591	speed
1	3	nrx1_61696_neuronal_mHTT	12.903	speed
1	4	nrx1_61696_neuronal_mHTT	11.931	speed
1	5	nrx1_61696_neuronal_mHTT	12.305	speed
2	1	nrx1_61696_neuronal_mHTT	12.6242	speed
2	2	nrx1_61696_neuronal_mHTT	12.7239	speed
2	3	nrx1_61696_neuronal_mHTT	12.5844	speed
2	4	nrx1_61696_neuronal_mHTT	11.7872	speed
2	5	nrx1_61696_neuronal_mHTT	11.6468	speed
3	1	nrx1_61696_neuronal_mHTT	10.0131	speed
3	2	nrx1_61696_neuronal_mHTT	10.4571	speed
3	3	nrx1_61696_neuronal_mHTT	10.4402	speed
3	4	nrx1_61696_neuronal_mHTT	10.2787	speed
3	5	nrx1_61696_neuronal_mHTT	10.2369	speed
4	1	nrx1_61696_neuronal_mHTT	9.81747	speed
4	2	nrx1_61696_neuronal_mHTT	5.54754	speed
4	3	nrx1_61696_neuronal_mHTT	9.96694	speed
4	4	nrx1_61696_neuronal_mHTT	8.70556	speed
4	5	nrx1_61696_neuronal_mHTT	8.86044	speed
7	1	nrx1_61696_neuronal_mHTT	4.72729	speed
7	2	nrx1_61696_neuronal_mHTT	4.53112	speed
7	3	nrx1_61696_neuronal_mHTT	4.30314	speed
7	4	nrx1_61696_neuronal_mHTT	5.03944	speed
7	5	nrx1_61696_neuronal_mHTT	5.16361	speed
8	1	nrx1_61696_neuronal_mHTT	4.08595	speed
8	2	nrx1_61696_neuronal_mHTT	2.8412	speed
8	3	nrx1_61696_neuronal_mHTT	4.08571	speed
8	4	nrx1_61696_neuronal_mHTT	4.4815	speed
8	5	nrx1_61696_neuronal_mHTT	4.20138	speed
9	1	nrx1_61696_neuronal_mHTT	4.30392	speed
9	2	nrx1_61696_neuronal_mHTT	3.59344	speed
9	3	nrx1_61696_neuronal_mHTT	3.96674	speed
9	4	nrx1_61696_neuronal_mHTT	3.97032	speed
9	5	nrx1_61696_neuronal_mHTT	3.93364	speed
10	1	nrx1_61696_neuronal_mHTT	3.23839	speed
10	2	nrx1_61696_neuronal_mHTT	3.59257	speed
10	3	nrx1_61696_neuronal_mHTT	3.55827	speed
10	4	nrx1_61696_neuronal_mHTT	3.00177	speed
10	5	nrx1_61696_neuronal_mHTT	3.29858	speed
11	1	nrx1_61696_neuronal_mHTT	3.59172	speed
11	2	nrx1_61696_neuronal_mHTT	3.0309	speed
11	3	nrx1_61696_neuronal_mHTT	3.16769	speed
11	4	nrx1_61696_neuronal_mHTT	2.98738	speed
11	5	nrx1_61696_neuronal_mHTT	3.06505	speed

## Sheet: Glial mHTT (nrx1,VDRC 36326)
Trialday	Replicate	Genotype	Observation	Metric
2	1	siHTT_neuronal_glial_mHTT	15.2429	speed
2	2	siHTT_neuronal_glial_mHTT	14.1218	speed
2	3	siHTT_neuronal_glial_mHTT	14.3621	speed
4	1	siHTT_neuronal_glial_mHTT	14.1116	speed
4	2	siHTT_neuronal_glial_mHTT	14.5602	speed
4	3	siHTT_neuronal_glial_mHTT	13.7707	speed
6	1	siHTT_neuronal_glial_mHTT	12.3826	speed
6	2	siHTT_neuronal_glial_mHTT	12.686	speed
6	3	siHTT_neuronal_glial_mHTT	11.4503	speed
8	1	siHTT_neuronal_glial_mHTT	13.084	speed
8	2	siHTT_neuronal_glial_mHTT	12.0751	speed
8	3	siHTT_neuronal_glial_mHTT	11.8399	speed
10	1	siHTT_neuronal_glial_mHTT	12.378	speed
10	2	siHTT_neuronal_glial_mHTT	12.6474	speed
10	3	siHTT_neuronal_glial_mHTT	12.1666	speed
2	1	non_targeting_hpRNA_repo_NT	13.023	speed
2	2	non_targeting_hpRNA_repo_NT	12.9784	speed
2	3	non_targeting_hpRNA_repo_NT	11.1135	speed
2	4	non_targeting_hpRNA_repo_NT	13.2885	speed
2	5	non_targeting_hpRNA_repo_NT	11.8717	speed
4	1	non_targeting_hpRNA_repo_NT	9.5997	speed
4	2	non_targeting_hpRNA_repo_NT	8.31061	speed
4	3	non_targeting_hpRNA_repo_NT	10.9343	speed
4	4	non_targeting_hpRNA_repo_NT	9.59899	speed
4	5	non_targeting_hpRNA_repo_NT	7.94434	speed
6	1	non_targeting_hpRNA_repo_NT	6.0889	speed
6	2	non_targeting_hpRNA_repo_NT	4.97861	speed
6	3	non_targeting_hpRNA_repo_NT	9.3358	speed
6	4	non_targeting_hpRNA_repo_NT	4.70485	speed
6	5	non_targeting_hpRNA_repo_NT	2.51283	speed
8	1	non_targeting_hpRNA_repo_NT	4.38558	speed
8	2	non_targeting_hpRNA_repo_NT	4.77424	speed
8	3	non_targeting_hpRNA_repo_NT	2.66032	speed
8	4	non_targeting_hpRNA_repo_NT	7.42298	speed
8	5	non_targeting_hpRNA_repo_NT	5.20816	speed
10	1	non_targeting_hpRNA_repo_NT	3.8257	speed
10	2	non_targeting_hpRNA_repo_NT	3.54213	speed
10	3	non_targeting_hpRNA_repo_NT	5.45175	speed
10	4	non_targeting_hpRNA_repo_NT		speed
10	5	non_targeting_hpRNA_repo_NT		speed
2	1	nrx1_36326_glial_mHTT	12.4095	speed
2	2	nrx1_36326_glial_mHTT	12.3011	speed
2	3	nrx1_36326_glial_mHTT	12.5001	speed
2	4	nrx1_36326_glial_mHTT	13.2738	speed
2	5	nrx1_36326_glial_mHTT	11.0842	speed
4	1	nrx1_36326_glial_mHTT	12.7142	speed
4	2	nrx1_36326_glial_mHTT	12.0142	speed
4	3	nrx1_36326_glial_mHTT	13.2633	speed
4	4	nrx1_36326_glial_mHTT	13.1697	speed
4	5	nrx1_36326_glial_mHTT	11.3126	speed
6	1	nrx1_36326_glial_mHTT	10.7789	speed
6	2	nrx1_36326_glial_mHTT	9.38811	speed
6	3	nrx1_36326_glial_mHTT	8.09567	speed
6	4	nrx1_36326_glial_mHTT	9.27201	speed
6	5	nrx1_36326_glial_mHTT	7.22494	speed
8	1	nrx1_36326_glial_mHTT	3.64473	speed
8	2	nrx1_36326_glial_mHTT	7.09677	speed
8	3	nrx1_36326_glial_mHTT	3.0296	speed
8	4	nrx1_36326_glial_mHTT	5.13571	speed
8	5	nrx1_36326_glial_mHTT	2.84122	speed
10	1	nrx1_36326_glial_mHTT	3.64478	speed
10	2	nrx1_36326_glial_mHTT	4.07376	speed
10	3	nrx1_36326_glial_mHTT	3.07182	speed
10	4	nrx1_36326_glial_mHTT	3.33017	speed
10	5	nrx1_36326_glial_mHTT	1.64335	speed

## Sheet: Neuron mHTT (nrx1,VDRC 36326)
Trialday	Replicate	Genotype	Observation	Metric
1	1	siHTT_neuronal_glial_mHTT	13.3815	speed
1	2	siHTT_neuronal_glial_mHTT	11.5999	speed
1	3	siHTT_neuronal_glial_mHTT	12.3377	speed
3	1	siHTT_neuronal_glial_mHTT	12.7057	speed
3	2	siHTT_neuronal_glial_mHTT	12.5284	speed
3	3	siHTT_neuronal_glial_mHTT	12.9742	speed
4	1	siHTT_neuronal_glial_mHTT	14.6148	speed
4	2	siHTT_neuronal_glial_mHTT	12.6467	speed
4	3	siHTT_neuronal_glial_mHTT	13.0536	speed
7	1	siHTT_neuronal_glial_mHTT	11.4911	speed
7	2	siHTT_neuronal_glial_mHTT	10.7145	speed
7	3	siHTT_neuronal_glial_mHTT	11.7765	speed
8	1	siHTT_neuronal_glial_mHTT	11.6162	speed
8	2	siHTT_neuronal_glial_mHTT	11.1088	speed
8	3	siHTT_neuronal_glial_mHTT	11.7051	speed
10	1	siHTT_neuronal_glial_mHTT	11.0595	speed
10	2	siHTT_neuronal_glial_mHTT	10.7499	speed
10	3	siHTT_neuronal_glial_mHTT	10.7093	speed
11	1	siHTT_neuronal_glial_mHTT	11.232	speed
11	2	siHTT_neuronal_glial_mHTT	9.93045	speed
11	3	siHTT_neuronal_glial_mHTT	11.1312	speed
12	1	siHTT_neuronal_glial_mHTT	10.4747	speed
12	2	siHTT_neuronal_glial_mHTT	9.24478	speed
12	3	siHTT_neuronal_glial_mHTT	10.6105	speed
13	1	siHTT_neuronal_glial_mHTT	10.3483	speed
13	2	siHTT_neuronal_glial_mHTT	9.47646	speed
13	3	siHTT_neuronal_glial_mHTT	10.387	speed
14	1	siHTT_neuronal_glial_mHTT	9.73287	speed
14	2	siHTT_neuronal_glial_mHTT	9.8041	speed
14	3	siHTT_neuronal_glial_mHTT	9.98432	speed
1	1	non_targeting_hpRNA_neuronal_mHTT	12.02	speed
1	2	non_targeting_hpRNA_neuronal_mHTT	12.8988	speed
3	1	non_targeting_hpRNA_neuronal_mHTT	10.8749	speed
3	2	non_targeting_hpRNA_neuronal_mHTT	11.911	speed
4	1	non_targeting_hpRNA_neuronal_mHTT	9.93329	speed
4	2	non_targeting_hpRNA_neuronal_mHTT	9.2998	speed
7	1	non_targeting_hpRNA_neuronal_mHTT	3.90602	speed
7	2	non_targeting_hpRNA_neuronal_mHTT	4.78646	speed
8	1	non_targeting_hpRNA_neuronal_mHTT	3.01905	speed
8	2	non_targeting_hpRNA_neuronal_mHTT	3.47349	speed
10	1	non_targeting_hpRNA_neuronal_mHTT	2.76566	speed
10	2	non_targeting_hpRNA_neuronal_mHTT	3.49049	speed
11	1	non_targeting_hpRNA_neuronal_mHTT	3.34003	speed
11	2	non_targeting_hpRNA_neuronal_mHTT	2.94862	speed
12	1	non_targeting_hpRNA_neuronal_mHTT	2.82234	speed
12	2	non_targeting_hpRNA_neuronal_mHTT	3.21594	speed
13	1	non_targeting_hpRNA_neuronal_mHTT	2.91816	speed
13	2	non_targeting_hpRNA_neuronal_mHTT	2.84487	speed
14	1	non_targeting_hpRNA_neuronal_mHTT		speed
14	2	non_targeting_hpRNA_neuronal_mHTT	2.82865	speed
1	1	nrx1_36326_neuronal_mHTT	12.5868	speed
1	2	nrx1_36326_neuronal_mHTT	11.5823	speed
1	3	nrx1_36326_neuronal_mHTT	12.8771	speed
1	4	nrx1_36326_neuronal_mHTT	11.6682	speed
3	1	nrx1_36326_neuronal_mHTT	11.6847	speed
3	2	nrx1_36326_neuronal_mHTT	9.57218	speed
3	3	nrx1_36326_neuronal_mHTT	11.4191	speed
3	4	nrx1_36326_neuronal_mHTT	10.4255	speed
4	1	nrx1_36326_neuronal_mHTT	10.2701	speed
4	2	nrx1_36326_neuronal_mHTT	8.94339	speed
4	3	nrx1_36326_neuronal_mHTT	10.259	speed
4	4	nrx1_36326_neuronal_mHTT	10.1276	speed
7	1	nrx1_36326_neuronal_mHTT	5.31567	speed
7	2	nrx1_36326_neuronal_mHTT	4.99149	speed
7	3	nrx1_36326_neuronal_mHTT	4.99618	speed
7	4	nrx1_36326_neuronal_mHTT	4.65887	speed
8	1	nrx1_36326_neuronal_mHTT	4.21795	speed
8	2	nrx1_36326_neuronal_mHTT	3.51774	speed
8	3	nrx1_36326_neuronal_mHTT	4.61908	speed
8	4	nrx1_36326_neuronal_mHTT	4.29655	speed
10	1	nrx1_36326_neuronal_mHTT	3.78933	speed
10	2	nrx1_36326_neuronal_mHTT	3.72545	speed
10	3	nrx1_36326_neuronal_mHTT	4.03737	speed
10	4	nrx1_36326_neuronal_mHTT	4.0359	speed
11	1	nrx1_36326_neuronal_mHTT	3.4067	speed
11	2	nrx1_36326_neuronal_mHTT	3.79596	speed
11	3	nrx1_36326_neuronal_mHTT	4.2402	speed
11	4	nrx1_36326_neuronal_mHTT	3.55923	speed
12	1	nrx1_36326_neuronal_mHTT	3.52541	speed
12	2	nrx1_36326_neuronal_mHTT	3.5663	speed
12	3	nrx1_36326_neuronal_mHTT	3.37305	speed
12	4	nrx1_36326_neuronal_mHTT	3.89309	speed
13	1	nrx1_36326_neuronal_mHTT	3.13218	speed
13	2	nrx1_36326_neuronal_mHTT	3.80688	speed
13	3	nrx1_36326_neuronal_mHTT	3.016	speed
13	4	nrx1_36326_neuronal_mHTT	3.54262	speed
14	1	nrx1_36326_neuronal_mHTT	3.22697	speed
14	2	nrx1_36326_neuronal_mHTT	3.5366	speed
14	3	nrx1_36326_neuronal_mHTT	3.66965	speed
14	4	nrx1_36326_neuronal_mHTT	3.70443	speed
