# Supplementary material for: Downregulation of glial genes involved in synaptic function mitigates Huntington's disease pathogenesis
Source: eLife. 2021 Apr 19;10:e64564. doi: 10.7554/eLife.64564 (PMC8149125; doi:10.7554/eLife.64564)
Supplement: Figure 5—figure supplement 1—source data 1. [file elife-64564-fig5-figsupp1-data1.xlsx]

## Sheet: Sheet1
Trialday	Replicate	Genotype	Observation	Metric
1	1	ABL1_abl_BDSC_8567_mHTT	13.7801	speed
2	1	ABL1_abl_BDSC_8567_mHTT	13.4608	speed
3	1	ABL1_abl_BDSC_8567_mHTT	12.5823	speed
4	1	ABL1_abl_BDSC_8567_mHTT	11.1383	speed
5	1	ABL1_abl_BDSC_8567_mHTT	12.8549	speed
6	1	ABL1_abl_BDSC_8567_mHTT	12.1002	speed
7	1	ABL1_abl_BDSC_8567_mHTT	10.8406	speed
8	1	ABL1_abl_BDSC_8567_mHTT	10.8647	speed
9	1	ABL1_abl_BDSC_8567_mHTT	10.8019	speed
10	1	ABL1_abl_BDSC_8567_mHTT	10.6266	speed
1	2	ABL1_abl_BDSC_8567_mHTT	13.7935	speed
2	2	ABL1_abl_BDSC_8567_mHTT	12.218	speed
3	2	ABL1_abl_BDSC_8567_mHTT	12.7382	speed
4	2	ABL1_abl_BDSC_8567_mHTT	11.744	speed
5	2	ABL1_abl_BDSC_8567_mHTT	13.0863	speed
6	2	ABL1_abl_BDSC_8567_mHTT	11.492	speed
7	2	ABL1_abl_BDSC_8567_mHTT	10.9395	speed
8	2	ABL1_abl_BDSC_8567_mHTT	10.1469	speed
9	2	ABL1_abl_BDSC_8567_mHTT	10.3432	speed
10	2	ABL1_abl_BDSC_8567_mHTT	10.0327	speed
1	3	ABL1_abl_BDSC_8567_mHTT	14.3475	speed
2	3	ABL1_abl_BDSC_8567_mHTT	13.5873	speed
3	3	ABL1_abl_BDSC_8567_mHTT	13.7526	speed
4	3	ABL1_abl_BDSC_8567_mHTT	13.0515	speed
5	3	ABL1_abl_BDSC_8567_mHTT	12.7584	speed
6	3	ABL1_abl_BDSC_8567_mHTT	12.127	speed
7	3	ABL1_abl_BDSC_8567_mHTT	10.4442	speed
8	3	ABL1_abl_BDSC_8567_mHTT	10.0216	speed
9	3	ABL1_abl_BDSC_8567_mHTT	11.0611	speed
1	4	ABL1_abl_BDSC_8567_mHTT	12.5276	speed
2	4	ABL1_abl_BDSC_8567_mHTT	12.4993	speed
3	4	ABL1_abl_BDSC_8567_mHTT	13.3721	speed
4	4	ABL1_abl_BDSC_8567_mHTT	13.5822	speed
5	4	ABL1_abl_BDSC_8567_mHTT	12.1002	speed
6	4	ABL1_abl_BDSC_8567_mHTT	12.2122	speed
7	4	ABL1_abl_BDSC_8567_mHTT	8.80675	speed
8	4	ABL1_abl_BDSC_8567_mHTT	9.91506	speed
9	4	ABL1_abl_BDSC_8567_mHTT	8.35462	speed
10	4	ABL1_abl_BDSC_8567_mHTT	5.73802	speed
1	5	ABL1_abl_BDSC_8567_mHTT	8.93929	speed
2	5	ABL1_abl_BDSC_8567_mHTT	11.7471	speed
3	5	ABL1_abl_BDSC_8567_mHTT	12.7716	speed
4	5	ABL1_abl_BDSC_8567_mHTT	13.2467	speed
5	5	ABL1_abl_BDSC_8567_mHTT	12.2051	speed
6	5	ABL1_abl_BDSC_8567_mHTT	12.3695	speed
7	5	ABL1_abl_BDSC_8567_mHTT	8.45616	speed
8	5	ABL1_abl_BDSC_8567_mHTT	9.09641	speed
9	5	ABL1_abl_BDSC_8567_mHTT	8.94392	speed
10	5	ABL1_abl_BDSC_8567_mHTT	8.60934	speed
1	6	ABL1_abl_BDSC_8567_mHTT	11.8145	speed
2	6	ABL1_abl_BDSC_8567_mHTT	12.0789	speed
3	6	ABL1_abl_BDSC_8567_mHTT	13.3415	speed
4	6	ABL1_abl_BDSC_8567_mHTT	11.5572	speed
5	6	ABL1_abl_BDSC_8567_mHTT	11.3037	speed
6	6	ABL1_abl_BDSC_8567_mHTT	11.6911	speed
7	6	ABL1_abl_BDSC_8567_mHTT	9.46307	speed
8	6	ABL1_abl_BDSC_8567_mHTT	10.8098	speed
9	6	ABL1_abl_BDSC_8567_mHTT	9.44795	speed
10	6	ABL1_abl_BDSC_8567_mHTT	9.71455	speed
1	7	ABL1_abl_BDSC_8567_mHTT	11.1993	speed
2	7	ABL1_abl_BDSC_8567_mHTT	12.0404	speed
3	7	ABL1_abl_BDSC_8567_mHTT	13.3087	speed
4	7	ABL1_abl_BDSC_8567_mHTT	11.7494	speed
5	7	ABL1_abl_BDSC_8567_mHTT	10.9484	speed
6	7	ABL1_abl_BDSC_8567_mHTT	9.86508	speed
7	7	ABL1_abl_BDSC_8567_mHTT	9.53166	speed
8	7	ABL1_abl_BDSC_8567_mHTT	9.96568	speed
9	7	ABL1_abl_BDSC_8567_mHTT	7.82649	speed
10	7	ABL1_abl_BDSC_8567_mHTT	7.66456	speed
1	8	ABL1_abl_BDSC_8567_mHTT	12.6756	speed
2	8	ABL1_abl_BDSC_8567_mHTT	11.7677	speed
3	8	ABL1_abl_BDSC_8567_mHTT	14.4347	speed
4	8	ABL1_abl_BDSC_8567_mHTT	13.9182	speed
5	8	ABL1_abl_BDSC_8567_mHTT	12.6882	speed
6	8	ABL1_abl_BDSC_8567_mHTT	12.9779	speed
7	8	ABL1_abl_BDSC_8567_mHTT	9.57228	speed
8	8	ABL1_abl_BDSC_8567_mHTT	9.37191	speed
9	8	ABL1_abl_BDSC_8567_mHTT	8.59284	speed
10	8	ABL1_abl_BDSC_8567_mHTT	8.10149	speed
1	1	ACADVL_CG7461_P15E3_mHTT	12.116	speed
2	1	ACADVL_CG7461_P15E3_mHTT	13.9574	speed
3	1	ACADVL_CG7461_P15E3_mHTT	13.5038	speed
4	1	ACADVL_CG7461_P15E3_mHTT	12.5788	speed
5	1	ACADVL_CG7461_P15E3_mHTT	11.838	speed
6	1	ACADVL_CG7461_P15E3_mHTT	10.0571	speed
7	1	ACADVL_CG7461_P15E3_mHTT	9.1492	speed
8	1	ACADVL_CG7461_P15E3_mHTT	9.21441	speed
9	1	ACADVL_CG7461_P15E3_mHTT	8.13742	speed
10	1	ACADVL_CG7461_P15E3_mHTT	8.37083	speed
1	2	ACADVL_CG7461_P15E3_mHTT	11.9729	speed
2	2	ACADVL_CG7461_P15E3_mHTT	12.0823	speed
3	2	ACADVL_CG7461_P15E3_mHTT	11.3084	speed
4	2	ACADVL_CG7461_P15E3_mHTT	12.0592	speed
5	2	ACADVL_CG7461_P15E3_mHTT	10.9386	speed
6	2	ACADVL_CG7461_P15E3_mHTT	9.86477	speed
7	2	ACADVL_CG7461_P15E3_mHTT	10.3446	speed
8	2	ACADVL_CG7461_P15E3_mHTT	9.63386	speed
9	2	ACADVL_CG7461_P15E3_mHTT	9.27059	speed
10	2	ACADVL_CG7461_P15E3_mHTT	10.3465	speed
1	3	ACADVL_CG7461_P15E3_mHTT	13.5363	speed
2	3	ACADVL_CG7461_P15E3_mHTT	13.1149	speed
3	3	ACADVL_CG7461_P15E3_mHTT	13.5393	speed
4	3	ACADVL_CG7461_P15E3_mHTT	12.9427	speed
5	3	ACADVL_CG7461_P15E3_mHTT	11.3969	speed
6	3	ACADVL_CG7461_P15E3_mHTT	9.23484	speed
7	3	ACADVL_CG7461_P15E3_mHTT	7.91683	speed
8	3	ACADVL_CG7461_P15E3_mHTT	7.49091	speed
9	3	ACADVL_CG7461_P15E3_mHTT	6.45309	speed
10	3	ACADVL_CG7461_P15E3_mHTT	7.19912	speed
1	4	ACADVL_CG7461_P15E3_mHTT	7.17745	speed
2	4	ACADVL_CG7461_P15E3_mHTT	13.2915	speed
3	4	ACADVL_CG7461_P15E3_mHTT	13.2181	speed
4	4	ACADVL_CG7461_P15E3_mHTT	12.715	speed
5	4	ACADVL_CG7461_P15E3_mHTT	11.2429	speed
6	4	ACADVL_CG7461_P15E3_mHTT	10.5706	speed
7	4	ACADVL_CG7461_P15E3_mHTT	8.66382	speed
8	4	ACADVL_CG7461_P15E3_mHTT	7.73533	speed
9	4	ACADVL_CG7461_P15E3_mHTT	7.9865	speed
10	4	ACADVL_CG7461_P15E3_mHTT	6.7109	speed
1	5	ACADVL_CG7461_P15E3_mHTT	13.6875	speed
2	5	ACADVL_CG7461_P15E3_mHTT	12.5364	speed
3	5	ACADVL_CG7461_P15E3_mHTT	13.2516	speed
4	5	ACADVL_CG7461_P15E3_mHTT	12.4975	speed
5	5	ACADVL_CG7461_P15E3_mHTT	10.6253	speed
6	5	ACADVL_CG7461_P15E3_mHTT	10.0526	speed
7	5	ACADVL_CG7461_P15E3_mHTT	6.82468	speed
8	5	ACADVL_CG7461_P15E3_mHTT	6.48418	speed
9	5	ACADVL_CG7461_P15E3_mHTT	6.82859	speed
10	5	ACADVL_CG7461_P15E3_mHTT	4.52018	speed
1	1	ADCY5_CG43373_VDRC_102057_mHTT	12.9282	speed
3	1	ADCY5_CG43373_VDRC_102057_mHTT	14.4286	speed
4	1	ADCY5_CG43373_VDRC_102057_mHTT	13.8292	speed
5	1	ADCY5_CG43373_VDRC_102057_mHTT	12.3474	speed
6	1	ADCY5_CG43373_VDRC_102057_mHTT	10.7536	speed
7	1	ADCY5_CG43373_VDRC_102057_mHTT	10.3772	speed
8	1	ADCY5_CG43373_VDRC_102057_mHTT	9.66213	speed
10	1	ADCY5_CG43373_VDRC_102057_mHTT	8.39241	speed
1	2	ADCY5_CG43373_VDRC_102057_mHTT	13.9828	speed
3	2	ADCY5_CG43373_VDRC_102057_mHTT	13.7858	speed
4	2	ADCY5_CG43373_VDRC_102057_mHTT	10.9648	speed
5	2	ADCY5_CG43373_VDRC_102057_mHTT	12.8883	speed
6	2	ADCY5_CG43373_VDRC_102057_mHTT	11.7759	speed
7	2	ADCY5_CG43373_VDRC_102057_mHTT	10.2415	speed
8	2	ADCY5_CG43373_VDRC_102057_mHTT	9.19961	speed
10	2	ADCY5_CG43373_VDRC_102057_mHTT	8.6642	speed
1	3	ADCY5_CG43373_VDRC_102057_mHTT	13.8418	speed
3	3	ADCY5_CG43373_VDRC_102057_mHTT	13.5203	speed
4	3	ADCY5_CG43373_VDRC_102057_mHTT	12.6463	speed
5	3	ADCY5_CG43373_VDRC_102057_mHTT	11.845	speed
6	3	ADCY5_CG43373_VDRC_102057_mHTT	11.0637	speed
7	3	ADCY5_CG43373_VDRC_102057_mHTT	10.6119	speed
8	3	ADCY5_CG43373_VDRC_102057_mHTT	8.37895	speed
10	3	ADCY5_CG43373_VDRC_102057_mHTT	7.63243	speed
1	4	ADCY5_CG43373_VDRC_102057_mHTT	13.5925	speed
3	4	ADCY5_CG43373_VDRC_102057_mHTT	14.2976	speed
4	4	ADCY5_CG43373_VDRC_102057_mHTT	13.1807	speed
5	4	ADCY5_CG43373_VDRC_102057_mHTT	11.3797	speed
6	4	ADCY5_CG43373_VDRC_102057_mHTT	10.343	speed
7	4	ADCY5_CG43373_VDRC_102057_mHTT	9.63224	speed
8	4	ADCY5_CG43373_VDRC_102057_mHTT	8.95443	speed
10	4	ADCY5_CG43373_VDRC_102057_mHTT	7.55508	speed
1	5	ADCY5_CG43373_VDRC_102057_mHTT	13.4187	speed
3	5	ADCY5_CG43373_VDRC_102057_mHTT	12.2564	speed
4	5	ADCY5_CG43373_VDRC_102057_mHTT	13.0391	speed
5	5	ADCY5_CG43373_VDRC_102057_mHTT	12.099	speed
6	5	ADCY5_CG43373_VDRC_102057_mHTT	11.4897	speed
7	5	ADCY5_CG43373_VDRC_102057_mHTT	10.5535	speed
8	5	ADCY5_CG43373_VDRC_102057_mHTT	9.55383	speed
10	5	ADCY5_CG43373_VDRC_102057_mHTT	8.796	speed
1	6	ADCY5_CG43373_VDRC_102057_mHTT	12.4724	speed
2	6	ADCY5_CG43373_VDRC_102057_mHTT	13.8079	speed
3	6	ADCY5_CG43373_VDRC_102057_mHTT	12.8212	speed
4	6	ADCY5_CG43373_VDRC_102057_mHTT	13.0335	speed
5	6	ADCY5_CG43373_VDRC_102057_mHTT	12.0488	speed
6	6	ADCY5_CG43373_VDRC_102057_mHTT	10.3724	speed
7	6	ADCY5_CG43373_VDRC_102057_mHTT	9.96728	speed
8	6	ADCY5_CG43373_VDRC_102057_mHTT	8.70097	speed
9	6	ADCY5_CG43373_VDRC_102057_mHTT	7.63392	speed
10	6	ADCY5_CG43373_VDRC_102057_mHTT	7.33546	speed
1	7	ADCY5_CG43373_VDRC_102057_mHTT	12.7222	speed
2	7	ADCY5_CG43373_VDRC_102057_mHTT	11.5801	speed
3	7	ADCY5_CG43373_VDRC_102057_mHTT	12.4889	speed
4	7	ADCY5_CG43373_VDRC_102057_mHTT	12.0872	speed
5	7	ADCY5_CG43373_VDRC_102057_mHTT	11.5092	speed
6	7	ADCY5_CG43373_VDRC_102057_mHTT	9.43492	speed
7	7	ADCY5_CG43373_VDRC_102057_mHTT	7.37252	speed
8	7	ADCY5_CG43373_VDRC_102057_mHTT	8.81729	speed
9	7	ADCY5_CG43373_VDRC_102057_mHTT	7.12419	speed
10	7	ADCY5_CG43373_VDRC_102057_mHTT	7.63546	speed
1	8	ADCY5_CG43373_VDRC_102057_mHTT	12.9741	speed
2	8	ADCY5_CG43373_VDRC_102057_mHTT	12.9136	speed
3	8	ADCY5_CG43373_VDRC_102057_mHTT	12.3457	speed
4	8	ADCY5_CG43373_VDRC_102057_mHTT	12.0021	speed
5	8	ADCY5_CG43373_VDRC_102057_mHTT	10.1563	speed
6	8	ADCY5_CG43373_VDRC_102057_mHTT	10.471	speed
7	8	ADCY5_CG43373_VDRC_102057_mHTT	8.08931	speed
8	8	ADCY5_CG43373_VDRC_102057_mHTT	8.01562	speed
9	8	ADCY5_CG43373_VDRC_102057_mHTT	6.86718	speed
10	8	ADCY5_CG43373_VDRC_102057_mHTT	6.29155	speed
1	9	ADCY5_CG43373_VDRC_102057_mHTT	13.5589	speed
2	9	ADCY5_CG43373_VDRC_102057_mHTT	13.1184	speed
3	9	ADCY5_CG43373_VDRC_102057_mHTT	13.4438	speed
4	9	ADCY5_CG43373_VDRC_102057_mHTT	13.0229	speed
5	9	ADCY5_CG43373_VDRC_102057_mHTT	12.484	speed
6	9	ADCY5_CG43373_VDRC_102057_mHTT	10.4059	speed
7	9	ADCY5_CG43373_VDRC_102057_mHTT	8.26297	speed
8	9	ADCY5_CG43373_VDRC_102057_mHTT	7.34987	speed
9	9	ADCY5_CG43373_VDRC_102057_mHTT	5.69832	speed
10	9	ADCY5_CG43373_VDRC_102057_mHTT	3.87432	speed
1	10	ADCY5_CG43373_VDRC_102057_mHTT	12.7208	speed
2	10	ADCY5_CG43373_VDRC_102057_mHTT	12.687	speed
3	10	ADCY5_CG43373_VDRC_102057_mHTT	12.0967	speed
4	10	ADCY5_CG43373_VDRC_102057_mHTT	12.9544	speed
5	10	ADCY5_CG43373_VDRC_102057_mHTT	11.2225	speed
6	10	ADCY5_CG43373_VDRC_102057_mHTT	10.1876	speed
7	10	ADCY5_CG43373_VDRC_102057_mHTT	8.33755	speed
8	10	ADCY5_CG43373_VDRC_102057_mHTT	6.65612	speed
9	10	ADCY5_CG43373_VDRC_102057_mHTT	6.24363	speed
10	10	ADCY5_CG43373_VDRC_102057_mHTT	4.99013	speed
1	11	ADCY5_CG43373_VDRC_102057_mHTT	12.9811	speed
2	11	ADCY5_CG43373_VDRC_102057_mHTT	12.9523	speed
3	11	ADCY5_CG43373_VDRC_102057_mHTT	13.6319	speed
4	11	ADCY5_CG43373_VDRC_102057_mHTT	12.3542	speed
5	11	ADCY5_CG43373_VDRC_102057_mHTT	11.4766	speed
6	11	ADCY5_CG43373_VDRC_102057_mHTT	10.0226	speed
7	11	ADCY5_CG43373_VDRC_102057_mHTT	8.49006	speed
8	11	ADCY5_CG43373_VDRC_102057_mHTT	8.32255	speed
9	11	ADCY5_CG43373_VDRC_102057_mHTT	7.63239	speed
10	11	ADCY5_CG43373_VDRC_102057_mHTT	5.23266	speed
1	1	ANXA1_AnxB10_BDSC_19193_mHTT	14.1855	speed
1	2	ANXA1_AnxB10_BDSC_19193_mHTT	13.1621	speed
1	3	ANXA1_AnxB10_BDSC_19193_mHTT	12.4654	speed
1	4	ANXA1_AnxB10_BDSC_19193_mHTT	13.1693	speed
1	5	ANXA1_AnxB10_BDSC_19193_mHTT	12.6437	speed
1	6	ANXA1_AnxB10_BDSC_19193_mHTT	13.2136	speed
1	7	ANXA1_AnxB10_BDSC_19193_mHTT	13.0272	speed
1	8	ANXA1_AnxB10_BDSC_19193_mHTT	13.2355	speed
1	9	ANXA1_AnxB10_BDSC_19193_mHTT	11.8764	speed
1	10	ANXA1_AnxB10_BDSC_19193_mHTT	10.5614	speed
3	1	ANXA1_AnxB10_BDSC_19193_mHTT	14.7657	speed
3	2	ANXA1_AnxB10_BDSC_19193_mHTT	13.3454	speed
3	3	ANXA1_AnxB10_BDSC_19193_mHTT	14.002	speed
3	4	ANXA1_AnxB10_BDSC_19193_mHTT	13.9605	speed
3	5	ANXA1_AnxB10_BDSC_19193_mHTT	13.7002	speed
3	6	ANXA1_AnxB10_BDSC_19193_mHTT	13.915	speed
3	7	ANXA1_AnxB10_BDSC_19193_mHTT	13.2015	speed
3	8	ANXA1_AnxB10_BDSC_19193_mHTT	14.4016	speed
3	9	ANXA1_AnxB10_BDSC_19193_mHTT	14.0964	speed
3	10	ANXA1_AnxB10_BDSC_19193_mHTT	13.0301	speed
4	1	ANXA1_AnxB10_BDSC_19193_mHTT	14.7991	speed
4	2	ANXA1_AnxB10_BDSC_19193_mHTT	13.7567	speed
4	3	ANXA1_AnxB10_BDSC_19193_mHTT	15.2883	speed
4	4	ANXA1_AnxB10_BDSC_19193_mHTT	13.8018	speed
4	5	ANXA1_AnxB10_BDSC_19193_mHTT	13.1029	speed
4	6	ANXA1_AnxB10_BDSC_19193_mHTT	14.7572	speed
4	7	ANXA1_AnxB10_BDSC_19193_mHTT	13.6605	speed
4	8	ANXA1_AnxB10_BDSC_19193_mHTT	14.5127	speed
4	9	ANXA1_AnxB10_BDSC_19193_mHTT	14.1544	speed
4	10	ANXA1_AnxB10_BDSC_19193_mHTT	13.534	speed
5	1	ANXA1_AnxB10_BDSC_19193_mHTT	13.794	speed
5	2	ANXA1_AnxB10_BDSC_19193_mHTT	12.5334	speed
5	3	ANXA1_AnxB10_BDSC_19193_mHTT	13.4349	speed
5	4	ANXA1_AnxB10_BDSC_19193_mHTT	13.0408	speed
5	5	ANXA1_AnxB10_BDSC_19193_mHTT	10.8276	speed
5	6	ANXA1_AnxB10_BDSC_19193_mHTT	12.4374	speed
5	7	ANXA1_AnxB10_BDSC_19193_mHTT	13.3402	speed
5	8	ANXA1_AnxB10_BDSC_19193_mHTT	12.6977	speed
5	9	ANXA1_AnxB10_BDSC_19193_mHTT	11.5952	speed
5	10	ANXA1_AnxB10_BDSC_19193_mHTT	12.2741	speed
6	1	ANXA1_AnxB10_BDSC_19193_mHTT	13.2025	speed
6	2	ANXA1_AnxB10_BDSC_19193_mHTT	12.2419	speed
6	3	ANXA1_AnxB10_BDSC_19193_mHTT	12.8225	speed
6	4	ANXA1_AnxB10_BDSC_19193_mHTT	11.7485	speed
6	5	ANXA1_AnxB10_BDSC_19193_mHTT	11.4743	speed
6	6	ANXA1_AnxB10_BDSC_19193_mHTT	12.8497	speed
6	7	ANXA1_AnxB10_BDSC_19193_mHTT	11.4849	speed
6	8	ANXA1_AnxB10_BDSC_19193_mHTT	11.7122	speed
6	9	ANXA1_AnxB10_BDSC_19193_mHTT	11.4241	speed
6	10	ANXA1_AnxB10_BDSC_19193_mHTT	10.2218	speed
7	1	ANXA1_AnxB10_BDSC_19193_mHTT	13.1406	speed
7	2	ANXA1_AnxB10_BDSC_19193_mHTT	10.8501	speed
7	3	ANXA1_AnxB10_BDSC_19193_mHTT	13.149	speed
7	4	ANXA1_AnxB10_BDSC_19193_mHTT	10.9926	speed
7	5	ANXA1_AnxB10_BDSC_19193_mHTT	9.79403	speed
7	6	ANXA1_AnxB10_BDSC_19193_mHTT	12.1828	speed
7	7	ANXA1_AnxB10_BDSC_19193_mHTT	13.2098	speed
7	8	ANXA1_AnxB10_BDSC_19193_mHTT	10.2781	speed
7	9	ANXA1_AnxB10_BDSC_19193_mHTT	9.87572	speed
7	10	ANXA1_AnxB10_BDSC_19193_mHTT	10.0344	speed
8	1	ANXA1_AnxB10_BDSC_19193_mHTT	10.036	speed
8	2	ANXA1_AnxB10_BDSC_19193_mHTT	9.02665	speed
8	3	ANXA1_AnxB10_BDSC_19193_mHTT	11.7018	speed
8	4	ANXA1_AnxB10_BDSC_19193_mHTT	10.0062	speed
8	5	ANXA1_AnxB10_BDSC_19193_mHTT	9.50424	speed
8	6	ANXA1_AnxB10_BDSC_19193_mHTT	11.1875	speed
8	7	ANXA1_AnxB10_BDSC_19193_mHTT	10.5978	speed
8	8	ANXA1_AnxB10_BDSC_19193_mHTT	8.5893	speed
8	9	ANXA1_AnxB10_BDSC_19193_mHTT	8.12679	speed
8	10	ANXA1_AnxB10_BDSC_19193_mHTT	8.64477	speed
10	1	ANXA1_AnxB10_BDSC_19193_mHTT	10.6637	speed
10	2	ANXA1_AnxB10_BDSC_19193_mHTT	7.57692	speed
10	3	ANXA1_AnxB10_BDSC_19193_mHTT	11.2431	speed
10	4	ANXA1_AnxB10_BDSC_19193_mHTT	7.85242	speed
10	5	ANXA1_AnxB10_BDSC_19193_mHTT	6.93565	speed
10	6	ANXA1_AnxB10_BDSC_19193_mHTT	9.31516	speed
10	7	ANXA1_AnxB10_BDSC_19193_mHTT	10.5631	speed
10	8	ANXA1_AnxB10_BDSC_19193_mHTT	7.27921	speed
10	9	ANXA1_AnxB10_BDSC_19193_mHTT	6.11	speed
10	10	ANXA1_AnxB10_BDSC_19193_mHTT	8.28843	speed
1	1	ANXA1_AnxB10_BDSC_30775_mHTT	12.3265	speed
3	1	ANXA1_AnxB10_BDSC_30775_mHTT	12.6259	speed
4	1	ANXA1_AnxB10_BDSC_30775_mHTT	11.8239	speed
5	1	ANXA1_AnxB10_BDSC_30775_mHTT	11.218	speed
6	1	ANXA1_AnxB10_BDSC_30775_mHTT	9.54321	speed
7	1	ANXA1_AnxB10_BDSC_30775_mHTT	9.11499	speed
8	1	ANXA1_AnxB10_BDSC_30775_mHTT	7.0568	speed
10	1	ANXA1_AnxB10_BDSC_30775_mHTT	5.89969	speed
1	2	ANXA1_AnxB10_BDSC_30775_mHTT	12.2429	speed
3	2	ANXA1_AnxB10_BDSC_30775_mHTT	13.0751	speed
4	2	ANXA1_AnxB10_BDSC_30775_mHTT	12.2419	speed
5	2	ANXA1_AnxB10_BDSC_30775_mHTT	12.5444	speed
6	2	ANXA1_AnxB10_BDSC_30775_mHTT	10.8952	speed
7	2	ANXA1_AnxB10_BDSC_30775_mHTT	10.8995	speed
8	2	ANXA1_AnxB10_BDSC_30775_mHTT	8.71163	speed
10	2	ANXA1_AnxB10_BDSC_30775_mHTT	7.89673	speed
1	3	ANXA1_AnxB10_BDSC_30775_mHTT	12.9603	speed
3	3	ANXA1_AnxB10_BDSC_30775_mHTT	13.9287	speed
4	3	ANXA1_AnxB10_BDSC_30775_mHTT	11.7825	speed
5	3	ANXA1_AnxB10_BDSC_30775_mHTT	12.3862	speed
6	3	ANXA1_AnxB10_BDSC_30775_mHTT	8.72236	speed
7	3	ANXA1_AnxB10_BDSC_30775_mHTT	9.92932	speed
8	3	ANXA1_AnxB10_BDSC_30775_mHTT	8.93487	speed
10	3	ANXA1_AnxB10_BDSC_30775_mHTT	9.6752	speed
1	4	ANXA1_AnxB10_BDSC_30775_mHTT	13.7678	speed
3	4	ANXA1_AnxB10_BDSC_30775_mHTT	14.0671	speed
4	4	ANXA1_AnxB10_BDSC_30775_mHTT	13.3135	speed
5	4	ANXA1_AnxB10_BDSC_30775_mHTT	12.8974	speed
6	4	ANXA1_AnxB10_BDSC_30775_mHTT	11.4149	speed
7	4	ANXA1_AnxB10_BDSC_30775_mHTT	7.69938	speed
8	4	ANXA1_AnxB10_BDSC_30775_mHTT	9.04962	speed
10	4	ANXA1_AnxB10_BDSC_30775_mHTT	8.126	speed
1	5	ANXA1_AnxB10_BDSC_30775_mHTT	13.4781	speed
3	5	ANXA1_AnxB10_BDSC_30775_mHTT	14.3712	speed
4	5	ANXA1_AnxB10_BDSC_30775_mHTT	13.6263	speed
5	5	ANXA1_AnxB10_BDSC_30775_mHTT	12.4993	speed
6	5	ANXA1_AnxB10_BDSC_30775_mHTT	11.862	speed
7	5	ANXA1_AnxB10_BDSC_30775_mHTT	11.2727	speed
8	5	ANXA1_AnxB10_BDSC_30775_mHTT	8.6757	speed
10	5	ANXA1_AnxB10_BDSC_30775_mHTT	8.77456	speed
1	6	ANXA1_AnxB10_BDSC_30775_mHTT	12.234	speed
3	6	ANXA1_AnxB10_BDSC_30775_mHTT	13.012	speed
4	6	ANXA1_AnxB10_BDSC_30775_mHTT	13.1089	speed
5	6	ANXA1_AnxB10_BDSC_30775_mHTT	11.6835	speed
6	6	ANXA1_AnxB10_BDSC_30775_mHTT	10.5422	speed
7	6	ANXA1_AnxB10_BDSC_30775_mHTT	9.13481	speed
8	6	ANXA1_AnxB10_BDSC_30775_mHTT	7.96097	speed
10	6	ANXA1_AnxB10_BDSC_30775_mHTT	7.6101	speed
1	1	ATF3_Atf3_BDSC_32289_mHTT	12.1808	speed
3	1	ATF3_Atf3_BDSC_32289_mHTT	14.4637	speed
4	1	ATF3_Atf3_BDSC_32289_mHTT	14.7745	speed
5	1	ATF3_Atf3_BDSC_32289_mHTT	13.1444	speed
6	1	ATF3_Atf3_BDSC_32289_mHTT	12.0877	speed
7	1	ATF3_Atf3_BDSC_32289_mHTT	11.5892	speed
8	1	ATF3_Atf3_BDSC_32289_mHTT	9.59235	speed
10	1	ATF3_Atf3_BDSC_32289_mHTT	9.62749	speed
1	2	ATF3_Atf3_BDSC_32289_mHTT	12.9464	speed
3	2	ATF3_Atf3_BDSC_32289_mHTT	13.7247	speed
4	2	ATF3_Atf3_BDSC_32289_mHTT	13.2973	speed
5	2	ATF3_Atf3_BDSC_32289_mHTT	12.0775	speed
6	2	ATF3_Atf3_BDSC_32289_mHTT	11.1771	speed
7	2	ATF3_Atf3_BDSC_32289_mHTT	11.1606	speed
8	2	ATF3_Atf3_BDSC_32289_mHTT	9.29797	speed
10	2	ATF3_Atf3_BDSC_32289_mHTT	8.97197	speed
1	3	ATF3_Atf3_BDSC_32289_mHTT	13.6114	speed
3	3	ATF3_Atf3_BDSC_32289_mHTT	14.7398	speed
4	3	ATF3_Atf3_BDSC_32289_mHTT	14.744	speed
5	3	ATF3_Atf3_BDSC_32289_mHTT	13.4489	speed
6	3	ATF3_Atf3_BDSC_32289_mHTT	12.0111	speed
7	3	ATF3_Atf3_BDSC_32289_mHTT	11.2662	speed
8	3	ATF3_Atf3_BDSC_32289_mHTT	9.9245	speed
10	3	ATF3_Atf3_BDSC_32289_mHTT	9.09356	speed
1	4	ATF3_Atf3_BDSC_32289_mHTT	13.173	speed
3	4	ATF3_Atf3_BDSC_32289_mHTT	14.2078	speed
4	4	ATF3_Atf3_BDSC_32289_mHTT	13.9798	speed
5	4	ATF3_Atf3_BDSC_32289_mHTT	13.2444	speed
6	4	ATF3_Atf3_BDSC_32289_mHTT	11.8993	speed
7	4	ATF3_Atf3_BDSC_32289_mHTT	10.8057	speed
8	4	ATF3_Atf3_BDSC_32289_mHTT	9.36254	speed
10	4	ATF3_Atf3_BDSC_32289_mHTT	8.73803	speed
1	5	ATF3_Atf3_BDSC_32289_mHTT	12.7001	speed
3	5	ATF3_Atf3_BDSC_32289_mHTT	13.7774	speed
4	5	ATF3_Atf3_BDSC_32289_mHTT	14.8177	speed
5	5	ATF3_Atf3_BDSC_32289_mHTT	12.8834	speed
6	5	ATF3_Atf3_BDSC_32289_mHTT	11.9126	speed
7	5	ATF3_Atf3_BDSC_32289_mHTT	10.4221	speed
8	5	ATF3_Atf3_BDSC_32289_mHTT	9.83479	speed
10	5	ATF3_Atf3_BDSC_32289_mHTT	9.71201	speed
1	6	ATF3_Atf3_BDSC_32289_mHTT	13.2443	speed
3	6	ATF3_Atf3_BDSC_32289_mHTT	13.2431	speed
4	6	ATF3_Atf3_BDSC_32289_mHTT	14.3546	speed
5	6	ATF3_Atf3_BDSC_32289_mHTT	12.2123	speed
6	6	ATF3_Atf3_BDSC_32289_mHTT	11.4374	speed
7	6	ATF3_Atf3_BDSC_32289_mHTT	10.9874	speed
8	6	ATF3_Atf3_BDSC_32289_mHTT	10.0325	speed
10	6	ATF3_Atf3_BDSC_32289_mHTT	8.58354	speed
1	1	CFL2_tsr_BDSC_9109_mHTT	13.4041	speed
2	1	CFL2_tsr_BDSC_9109_mHTT	13.2864	speed
3	1	CFL2_tsr_BDSC_9109_mHTT	14.2384	speed
4	1	CFL2_tsr_BDSC_9109_mHTT	15.1143	speed
5	1	CFL2_tsr_BDSC_9109_mHTT	13.9382	speed
6	1	CFL2_tsr_BDSC_9109_mHTT	13.4441	speed
7	1	CFL2_tsr_BDSC_9109_mHTT	10.0966	speed
8	1	CFL2_tsr_BDSC_9109_mHTT	11.5339	speed
9	1	CFL2_tsr_BDSC_9109_mHTT	13.03	speed
10	1	CFL2_tsr_BDSC_9109_mHTT	13.1113	speed
1	2	CFL2_tsr_BDSC_9109_mHTT	14.7365	speed
2	2	CFL2_tsr_BDSC_9109_mHTT	14.1698	speed
3	2	CFL2_tsr_BDSC_9109_mHTT	14.9317	speed
4	2	CFL2_tsr_BDSC_9109_mHTT	16.2193	speed
5	2	CFL2_tsr_BDSC_9109_mHTT	15.0813	speed
6	2	CFL2_tsr_BDSC_9109_mHTT	15.3858	speed
7	2	CFL2_tsr_BDSC_9109_mHTT	13.818	speed
8	2	CFL2_tsr_BDSC_9109_mHTT	13.2499	speed
9	2	CFL2_tsr_BDSC_9109_mHTT	12.6479	speed
10	2	CFL2_tsr_BDSC_9109_mHTT	14.0953	speed
1	3	CFL2_tsr_BDSC_9109_mHTT	14.4726	speed
2	3	CFL2_tsr_BDSC_9109_mHTT	13.6016	speed
3	3	CFL2_tsr_BDSC_9109_mHTT	13.8472	speed
4	3	CFL2_tsr_BDSC_9109_mHTT	15.0645	speed
5	3	CFL2_tsr_BDSC_9109_mHTT	14.1308	speed
6	3	CFL2_tsr_BDSC_9109_mHTT	14.6598	speed
7	3	CFL2_tsr_BDSC_9109_mHTT	13.3804	speed
8	3	CFL2_tsr_BDSC_9109_mHTT	13.6072	speed
9	3	CFL2_tsr_BDSC_9109_mHTT	13.1627	speed
10	3	CFL2_tsr_BDSC_9109_mHTT	14.2385	speed
1	4	CFL2_tsr_BDSC_9109_mHTT	14.6784	speed
2	4	CFL2_tsr_BDSC_9109_mHTT	12.9198	speed
3	4	CFL2_tsr_BDSC_9109_mHTT	14.2043	speed
4	4	CFL2_tsr_BDSC_9109_mHTT	15.4583	speed
5	4	CFL2_tsr_BDSC_9109_mHTT	14.53	speed
6	4	CFL2_tsr_BDSC_9109_mHTT	14.6084	speed
7	4	CFL2_tsr_BDSC_9109_mHTT	13.231	speed
8	4	CFL2_tsr_BDSC_9109_mHTT	13.5712	speed
9	4	CFL2_tsr_BDSC_9109_mHTT	13.9095	speed
10	4	CFL2_tsr_BDSC_9109_mHTT	14.6885	speed
1	5	CFL2_tsr_BDSC_9109_mHTT	14.2859	speed
2	5	CFL2_tsr_BDSC_9109_mHTT	13.334	speed
3	5	CFL2_tsr_BDSC_9109_mHTT	14.1587	speed
4	5	CFL2_tsr_BDSC_9109_mHTT	14.6881	speed
5	5	CFL2_tsr_BDSC_9109_mHTT	13.5037	speed
6	5	CFL2_tsr_BDSC_9109_mHTT	14.344	speed
7	5	CFL2_tsr_BDSC_9109_mHTT	12.7747	speed
8	5	CFL2_tsr_BDSC_9109_mHTT	13.8844	speed
9	5	CFL2_tsr_BDSC_9109_mHTT	11.0248	speed
10	5	CFL2_tsr_BDSC_9109_mHTT	12.6623	speed
1	6	CFL2_tsr_BDSC_9109_mHTT	13.3026	speed
2	6	CFL2_tsr_BDSC_9109_mHTT	14.5754	speed
3	6	CFL2_tsr_BDSC_9109_mHTT	14.4565	speed
4	6	CFL2_tsr_BDSC_9109_mHTT	14.9523	speed
5	6	CFL2_tsr_BDSC_9109_mHTT	13.7007	speed
6	6	CFL2_tsr_BDSC_9109_mHTT	14.4386	speed
7	6	CFL2_tsr_BDSC_9109_mHTT	13.3868	speed
8	6	CFL2_tsr_BDSC_9109_mHTT	11.266	speed
9	6	CFL2_tsr_BDSC_9109_mHTT	12.1458	speed
10	6	CFL2_tsr_BDSC_9109_mHTT	11.9782	speed
1	1	DDX17_mahe_VDRC_46933_mHTT	13.4001	speed
2	1	DDX17_mahe_VDRC_46933_mHTT	13.591	speed
3	1	DDX17_mahe_VDRC_46933_mHTT	13.0374	speed
4	1	DDX17_mahe_VDRC_46933_mHTT	12.3873	speed
5	1	DDX17_mahe_VDRC_46933_mHTT	12.0789	speed
6	1	DDX17_mahe_VDRC_46933_mHTT	10.3562	speed
7	1	DDX17_mahe_VDRC_46933_mHTT	8.04019	speed
8	1	DDX17_mahe_VDRC_46933_mHTT	8.2703	speed
9	1	DDX17_mahe_VDRC_46933_mHTT	6.87897	speed
10	1	DDX17_mahe_VDRC_46933_mHTT	6.85101	speed
1	2	DDX17_mahe_VDRC_46933_mHTT	12.9234	speed
2	2	DDX17_mahe_VDRC_46933_mHTT	13.5811	speed
3	2	DDX17_mahe_VDRC_46933_mHTT	14.0469	speed
4	2	DDX17_mahe_VDRC_46933_mHTT	13.1872	speed
5	2	DDX17_mahe_VDRC_46933_mHTT	12.1961	speed
6	2	DDX17_mahe_VDRC_46933_mHTT	11.8133	speed
7	2	DDX17_mahe_VDRC_46933_mHTT		speed
8	2	DDX17_mahe_VDRC_46933_mHTT		speed
9	2	DDX17_mahe_VDRC_46933_mHTT		speed
10	2	DDX17_mahe_VDRC_46933_mHTT	2.16038	speed
1	3	DDX17_mahe_VDRC_46933_mHTT	13.9788	speed
2	3	DDX17_mahe_VDRC_46933_mHTT	12.9978	speed
3	3	DDX17_mahe_VDRC_46933_mHTT	13.341	speed
4	3	DDX17_mahe_VDRC_46933_mHTT	14.0838	speed
5	3	DDX17_mahe_VDRC_46933_mHTT	12.4659	speed
6	3	DDX17_mahe_VDRC_46933_mHTT	11.9375	speed
7	3	DDX17_mahe_VDRC_46933_mHTT	10.3935	speed
8	3	DDX17_mahe_VDRC_46933_mHTT	9.69431	speed
9	3	DDX17_mahe_VDRC_46933_mHTT	8.41863	speed
10	3	DDX17_mahe_VDRC_46933_mHTT	7.72458	speed
1	4	DDX17_mahe_VDRC_46933_mHTT	13.6647	speed
2	4	DDX17_mahe_VDRC_46933_mHTT	14.0522	speed
3	4	DDX17_mahe_VDRC_46933_mHTT	13.7001	speed
4	4	DDX17_mahe_VDRC_46933_mHTT	12.5935	speed
5	4	DDX17_mahe_VDRC_46933_mHTT	11.7766	speed
6	4	DDX17_mahe_VDRC_46933_mHTT	11.0896	speed
7	4	DDX17_mahe_VDRC_46933_mHTT	11.2585	speed
8	4	DDX17_mahe_VDRC_46933_mHTT	10.2205	speed
9	4	DDX17_mahe_VDRC_46933_mHTT	9.99648	speed
1	5	DDX17_mahe_VDRC_46933_mHTT	13.2226	speed
2	5	DDX17_mahe_VDRC_46933_mHTT	14.1127	speed
3	5	DDX17_mahe_VDRC_46933_mHTT	13.5005	speed
4	5	DDX17_mahe_VDRC_46933_mHTT	11.8552	speed
5	5	DDX17_mahe_VDRC_46933_mHTT	10.6167	speed
6	5	DDX17_mahe_VDRC_46933_mHTT	9.9851	speed
7	5	DDX17_mahe_VDRC_46933_mHTT	8.55805	speed
8	5	DDX17_mahe_VDRC_46933_mHTT	7.79001	speed
9	5	DDX17_mahe_VDRC_46933_mHTT	7.42402	speed
1	1	DNAJB1_CG32640_BDSC_30282_mHTT	12.5054	speed
3	1	DNAJB1_CG32640_BDSC_30282_mHTT	13.8122	speed
4	1	DNAJB1_CG32640_BDSC_30282_mHTT	13.9594	speed
5	1	DNAJB1_CG32640_BDSC_30282_mHTT	12.0164	speed
6	1	DNAJB1_CG32640_BDSC_30282_mHTT	11.2113	speed
7	1	DNAJB1_CG32640_BDSC_30282_mHTT	10.3575	speed
8	1	DNAJB1_CG32640_BDSC_30282_mHTT	8.89005	speed
10	1	DNAJB1_CG32640_BDSC_30282_mHTT	6.87868	speed
1	2	DNAJB1_CG32640_BDSC_30282_mHTT	12.7185	speed
3	2	DNAJB1_CG32640_BDSC_30282_mHTT	13.7382	speed
4	2	DNAJB1_CG32640_BDSC_30282_mHTT	12.6694	speed
5	2	DNAJB1_CG32640_BDSC_30282_mHTT	11.094	speed
6	2	DNAJB1_CG32640_BDSC_30282_mHTT	9.891	speed
7	2	DNAJB1_CG32640_BDSC_30282_mHTT	9.54015	speed
8	2	DNAJB1_CG32640_BDSC_30282_mHTT	8.2733	speed
10	2	DNAJB1_CG32640_BDSC_30282_mHTT	7.29405	speed
1	3	DNAJB1_CG32640_BDSC_30282_mHTT	13.3061	speed
3	3	DNAJB1_CG32640_BDSC_30282_mHTT	14.3758	speed
4	3	DNAJB1_CG32640_BDSC_30282_mHTT	13.8057	speed
5	3	DNAJB1_CG32640_BDSC_30282_mHTT	12.2523	speed
6	3	DNAJB1_CG32640_BDSC_30282_mHTT	11.4158	speed
7	3	DNAJB1_CG32640_BDSC_30282_mHTT	11.2252	speed
8	3	DNAJB1_CG32640_BDSC_30282_mHTT	9.19741	speed
10	3	DNAJB1_CG32640_BDSC_30282_mHTT	8.76148	speed
1	4	DNAJB1_CG32640_BDSC_30282_mHTT	13.0666	speed
3	4	DNAJB1_CG32640_BDSC_30282_mHTT	13.8845	speed
4	4	DNAJB1_CG32640_BDSC_30282_mHTT	13.7326	speed
5	4	DNAJB1_CG32640_BDSC_30282_mHTT	10.7266	speed
6	4	DNAJB1_CG32640_BDSC_30282_mHTT	10.7768	speed
7	4	DNAJB1_CG32640_BDSC_30282_mHTT	11.0421	speed
8	4	DNAJB1_CG32640_BDSC_30282_mHTT	8.90741	speed
10	4	DNAJB1_CG32640_BDSC_30282_mHTT	8.34631	speed
1	5	DNAJB1_CG32640_BDSC_30282_mHTT	12.7424	speed
3	5	DNAJB1_CG32640_BDSC_30282_mHTT	13.5995	speed
4	5	DNAJB1_CG32640_BDSC_30282_mHTT	14.1849	speed
5	5	DNAJB1_CG32640_BDSC_30282_mHTT	11.1101	speed
6	5	DNAJB1_CG32640_BDSC_30282_mHTT	10.1195	speed
7	5	DNAJB1_CG32640_BDSC_30282_mHTT	9.16326	speed
8	5	DNAJB1_CG32640_BDSC_30282_mHTT	7.88663	speed
10	5	DNAJB1_CG32640_BDSC_30282_mHTT	7.6962	speed
1	6	DNAJB1_CG32640_BDSC_30282_mHTT	10.7438	speed
3	6	DNAJB1_CG32640_BDSC_30282_mHTT	13.4303	speed
4	6	DNAJB1_CG32640_BDSC_30282_mHTT	13.4407	speed
5	6	DNAJB1_CG32640_BDSC_30282_mHTT	11.3933	speed
6	6	DNAJB1_CG32640_BDSC_30282_mHTT	9.8182	speed
7	6	DNAJB1_CG32640_BDSC_30282_mHTT	7.8817	speed
8	6	DNAJB1_CG32640_BDSC_30282_mHTT	7.11965	speed
10	6	DNAJB1_CG32640_BDSC_30282_mHTT	7.08503	speed
1	1	DNAJB1_DnaJ-1_GV_P12C12_mHTT	12.5455	speed
3	1	DNAJB1_DnaJ-1_GV_P12C12_mHTT	12.9459	speed
4	1	DNAJB1_DnaJ-1_GV_P12C12_mHTT	12.4429	speed
5	1	DNAJB1_DnaJ-1_GV_P12C12_mHTT	11.6243	speed
6	1	DNAJB1_DnaJ-1_GV_P12C12_mHTT	10.9246	speed
7	1	DNAJB1_DnaJ-1_GV_P12C12_mHTT	10.6526	speed
8	1	DNAJB1_DnaJ-1_GV_P12C12_mHTT	8.36438	speed
10	1	DNAJB1_DnaJ-1_GV_P12C12_mHTT	8.59623	speed
1	2	DNAJB1_DnaJ-1_GV_P12C12_mHTT	12.9279	speed
3	2	DNAJB1_DnaJ-1_GV_P12C12_mHTT	12.6357	speed
4	2	DNAJB1_DnaJ-1_GV_P12C12_mHTT	12.7774	speed
5	2	DNAJB1_DnaJ-1_GV_P12C12_mHTT	12.3313	speed
6	2	DNAJB1_DnaJ-1_GV_P12C12_mHTT	10.9638	speed
7	2	DNAJB1_DnaJ-1_GV_P12C12_mHTT	11.131	speed
8	2	DNAJB1_DnaJ-1_GV_P12C12_mHTT	8.01871	speed
10	2	DNAJB1_DnaJ-1_GV_P12C12_mHTT	7.50476	speed
1	3	DNAJB1_DnaJ-1_GV_P12C12_mHTT	12.8263	speed
2	3	DNAJB1_DnaJ-1_GV_P12C12_mHTT	12.8104	speed
3	3	DNAJB1_DnaJ-1_GV_P12C12_mHTT	13.104	speed
4	3	DNAJB1_DnaJ-1_GV_P12C12_mHTT	11.7566	speed
5	3	DNAJB1_DnaJ-1_GV_P12C12_mHTT	10.1868	speed
6	3	DNAJB1_DnaJ-1_GV_P12C12_mHTT	7.46232	speed
7	3	DNAJB1_DnaJ-1_GV_P12C12_mHTT	6.17335	speed
8	3	DNAJB1_DnaJ-1_GV_P12C12_mHTT	4.87601	speed
9	3	DNAJB1_DnaJ-1_GV_P12C12_mHTT	4.26992	speed
1	4	DNAJB1_DnaJ-1_GV_P12C12_mHTT	12.2957	speed
2	4	DNAJB1_DnaJ-1_GV_P12C12_mHTT	12.4019	speed
3	4	DNAJB1_DnaJ-1_GV_P12C12_mHTT	12.8885	speed
4	4	DNAJB1_DnaJ-1_GV_P12C12_mHTT	10.9943	speed
5	4	DNAJB1_DnaJ-1_GV_P12C12_mHTT	10.143	speed
6	4	DNAJB1_DnaJ-1_GV_P12C12_mHTT	8.59716	speed
7	4	DNAJB1_DnaJ-1_GV_P12C12_mHTT	5.99257	speed
8	4	DNAJB1_DnaJ-1_GV_P12C12_mHTT	5.69147	speed
9	4	DNAJB1_DnaJ-1_GV_P12C12_mHTT	5.65079	speed
1	1	ENAH_ena_BDSC_66169_mHTT	11.2785	speed
2	1	ENAH_ena_BDSC_66169_mHTT	11.9587	speed
3	1	ENAH_ena_BDSC_66169_mHTT	13.1922	speed
4	1	ENAH_ena_BDSC_66169_mHTT	14.3777	speed
5	1	ENAH_ena_BDSC_66169_mHTT	13.7787	speed
6	1	ENAH_ena_BDSC_66169_mHTT	14.4155	speed
7	1	ENAH_ena_BDSC_66169_mHTT	11.6082	speed
8	1	ENAH_ena_BDSC_66169_mHTT	11.9883	speed
9	1	ENAH_ena_BDSC_66169_mHTT	11.416	speed
10	1	ENAH_ena_BDSC_66169_mHTT	11.6895	speed
1	2	ENAH_ena_BDSC_66169_mHTT	12.3794	speed
2	2	ENAH_ena_BDSC_66169_mHTT	13.5328	speed
3	2	ENAH_ena_BDSC_66169_mHTT	15.0178	speed
4	2	ENAH_ena_BDSC_66169_mHTT	14.6632	speed
5	2	ENAH_ena_BDSC_66169_mHTT	14.2651	speed
6	2	ENAH_ena_BDSC_66169_mHTT	15.2103	speed
7	2	ENAH_ena_BDSC_66169_mHTT	13.5104	speed
8	2	ENAH_ena_BDSC_66169_mHTT	13.3127	speed
9	2	ENAH_ena_BDSC_66169_mHTT	13.6113	speed
10	2	ENAH_ena_BDSC_66169_mHTT	13.3394	speed
1	3	ENAH_ena_BDSC_66169_mHTT	11.8214	speed
2	3	ENAH_ena_BDSC_66169_mHTT	13.1183	speed
3	3	ENAH_ena_BDSC_66169_mHTT	14.4306	speed
4	3	ENAH_ena_BDSC_66169_mHTT	14.3123	speed
5	3	ENAH_ena_BDSC_66169_mHTT	13.8	speed
6	3	ENAH_ena_BDSC_66169_mHTT	14.2536	speed
7	3	ENAH_ena_BDSC_66169_mHTT	12.8687	speed
8	3	ENAH_ena_BDSC_66169_mHTT	13.0191	speed
9	3	ENAH_ena_BDSC_66169_mHTT	12.5123	speed
10	3	ENAH_ena_BDSC_66169_mHTT	12.3509	speed
1	4	ENAH_ena_BDSC_66169_mHTT	11.7763	speed
2	4	ENAH_ena_BDSC_66169_mHTT	12.4733	speed
3	4	ENAH_ena_BDSC_66169_mHTT	13.3462	speed
4	4	ENAH_ena_BDSC_66169_mHTT	14.5864	speed
5	4	ENAH_ena_BDSC_66169_mHTT	13.0586	speed
6	4	ENAH_ena_BDSC_66169_mHTT	13.5996	speed
7	4	ENAH_ena_BDSC_66169_mHTT	12.2939	speed
8	4	ENAH_ena_BDSC_66169_mHTT	13.1698	speed
9	4	ENAH_ena_BDSC_66169_mHTT	13.1214	speed
10	4	ENAH_ena_BDSC_66169_mHTT	11.191	speed
1	5	ENAH_ena_BDSC_66169_mHTT	12.2431	speed
2	5	ENAH_ena_BDSC_66169_mHTT	14.0542	speed
3	5	ENAH_ena_BDSC_66169_mHTT	13.9606	speed
4	5	ENAH_ena_BDSC_66169_mHTT	14.3823	speed
5	5	ENAH_ena_BDSC_66169_mHTT	13.5478	speed
6	5	ENAH_ena_BDSC_66169_mHTT	13.5184	speed
7	5	ENAH_ena_BDSC_66169_mHTT	12.1218	speed
8	5	ENAH_ena_BDSC_66169_mHTT	12.5203	speed
9	5	ENAH_ena_BDSC_66169_mHTT	12.1675	speed
10	5	ENAH_ena_BDSC_66169_mHTT	11.6291	speed
1	6	ENAH_ena_BDSC_66169_mHTT	11.3591	speed
2	6	ENAH_ena_BDSC_66169_mHTT	11.9631	speed
3	6	ENAH_ena_BDSC_66169_mHTT	12.585	speed
4	6	ENAH_ena_BDSC_66169_mHTT	15.0128	speed
5	6	ENAH_ena_BDSC_66169_mHTT	13.4409	speed
6	6	ENAH_ena_BDSC_66169_mHTT	14.9655	speed
7	6	ENAH_ena_BDSC_66169_mHTT	13.3427	speed
8	6	ENAH_ena_BDSC_66169_mHTT	13.4138	speed
9	6	ENAH_ena_BDSC_66169_mHTT	14.6162	speed
10	6	ENAH_ena_BDSC_66169_mHTT	11.5128	speed
1	1	FLT4_pvr_VDRC_977_mHTT	13.4816	speed
2	1	FLT4_pvr_VDRC_977_mHTT	14.2284	speed
3	1	FLT4_pvr_VDRC_977_mHTT	14.3677	speed
4	1	FLT4_pvr_VDRC_977_mHTT	13.3174	speed
5	1	FLT4_pvr_VDRC_977_mHTT	12.5788	speed
6	1	FLT4_pvr_VDRC_977_mHTT	10.8873	speed
7	1	FLT4_pvr_VDRC_977_mHTT	9.43606	speed
8	1	FLT4_pvr_VDRC_977_mHTT	8.69836	speed
9	1	FLT4_pvr_VDRC_977_mHTT	7.21685	speed
10	1	FLT4_pvr_VDRC_977_mHTT	8.46702	speed
1	2	FLT4_pvr_VDRC_977_mHTT	9.90423	speed
2	2	FLT4_pvr_VDRC_977_mHTT	13.898	speed
3	2	FLT4_pvr_VDRC_977_mHTT	14.8662	speed
4	2	FLT4_pvr_VDRC_977_mHTT	13.2044	speed
5	2	FLT4_pvr_VDRC_977_mHTT	13.3424	speed
6	2	FLT4_pvr_VDRC_977_mHTT	11.66	speed
7	2	FLT4_pvr_VDRC_977_mHTT	8.84657	speed
8	2	FLT4_pvr_VDRC_977_mHTT	8.59174	speed
9	2	FLT4_pvr_VDRC_977_mHTT	7.08012	speed
10	2	FLT4_pvr_VDRC_977_mHTT	4.21054	speed
1	3	FLT4_pvr_VDRC_977_mHTT	9.84126	speed
2	3	FLT4_pvr_VDRC_977_mHTT	13.2999	speed
3	3	FLT4_pvr_VDRC_977_mHTT	14.4196	speed
4	3	FLT4_pvr_VDRC_977_mHTT	14.2544	speed
5	3	FLT4_pvr_VDRC_977_mHTT	12.1634	speed
6	3	FLT4_pvr_VDRC_977_mHTT	9.95592	speed
7	3	FLT4_pvr_VDRC_977_mHTT	8.48851	speed
8	3	FLT4_pvr_VDRC_977_mHTT	6.33197	speed
9	3	FLT4_pvr_VDRC_977_mHTT	6.47492	speed
10	3	FLT4_pvr_VDRC_977_mHTT	4.96286	speed
1	4	FLT4_pvr_VDRC_977_mHTT	11.8236	speed
2	4	FLT4_pvr_VDRC_977_mHTT	15.1735	speed
3	4	FLT4_pvr_VDRC_977_mHTT	14.185	speed
4	4	FLT4_pvr_VDRC_977_mHTT	12.7531	speed
5	4	FLT4_pvr_VDRC_977_mHTT	12.6829	speed
6	4	FLT4_pvr_VDRC_977_mHTT	10.9148	speed
7	4	FLT4_pvr_VDRC_977_mHTT	10.3669	speed
8	4	FLT4_pvr_VDRC_977_mHTT	8.83834	speed
9	4	FLT4_pvr_VDRC_977_mHTT	7.86328	speed
10	4	FLT4_pvr_VDRC_977_mHTT	5.55424	speed
1	5	FLT4_pvr_VDRC_977_mHTT	13.983	speed
2	5	FLT4_pvr_VDRC_977_mHTT	14.3895	speed
3	5	FLT4_pvr_VDRC_977_mHTT	15.3354	speed
4	5	FLT4_pvr_VDRC_977_mHTT	14.4252	speed
5	5	FLT4_pvr_VDRC_977_mHTT	13.1563	speed
6	5	FLT4_pvr_VDRC_977_mHTT	11.2971	speed
7	5	FLT4_pvr_VDRC_977_mHTT	10.8921	speed
8	5	FLT4_pvr_VDRC_977_mHTT	11.121	speed
9	5	FLT4_pvr_VDRC_977_mHTT	10.0714	speed
10	5	FLT4_pvr_VDRC_977_mHTT	9.85144	speed
1	6	FLT4_pvr_VDRC_977_mHTT	14.2877	speed
2	6	FLT4_pvr_VDRC_977_mHTT	13.8584	speed
3	6	FLT4_pvr_VDRC_977_mHTT	13.3642	speed
4	6	FLT4_pvr_VDRC_977_mHTT	12.859	speed
5	6	FLT4_pvr_VDRC_977_mHTT	12.174	speed
6	6	FLT4_pvr_VDRC_977_mHTT	11.1847	speed
7	6	FLT4_pvr_VDRC_977_mHTT	8.67391	speed
8	6	FLT4_pvr_VDRC_977_mHTT	7.01277	speed
9	6	FLT4_pvr_VDRC_977_mHTT	7.03728	speed
10	6	FLT4_pvr_VDRC_977_mHTT	3.99829	speed
1	1	GABRG2_CG8916_VDRC_9138_mHTT	12.055	speed
3	1	GABRG2_CG8916_VDRC_9138_mHTT	12.9279	speed
4	1	GABRG2_CG8916_VDRC_9138_mHTT	12.6116	speed
5	1	GABRG2_CG8916_VDRC_9138_mHTT	11.5547	speed
6	1	GABRG2_CG8916_VDRC_9138_mHTT	9.80729	speed
7	1	GABRG2_CG8916_VDRC_9138_mHTT	9.55974	speed
8	1	GABRG2_CG8916_VDRC_9138_mHTT	8.26374	speed
10	1	GABRG2_CG8916_VDRC_9138_mHTT	6.74433	speed
1	2	GABRG2_CG8916_VDRC_9138_mHTT	12.5068	speed
3	2	GABRG2_CG8916_VDRC_9138_mHTT	12.7137	speed
4	2	GABRG2_CG8916_VDRC_9138_mHTT	12.9224	speed
5	2	GABRG2_CG8916_VDRC_9138_mHTT	11.6979	speed
6	2	GABRG2_CG8916_VDRC_9138_mHTT	10.6926	speed
7	2	GABRG2_CG8916_VDRC_9138_mHTT	9.5747	speed
8	2	GABRG2_CG8916_VDRC_9138_mHTT	6.90799	speed
10	2	GABRG2_CG8916_VDRC_9138_mHTT	5.79122	speed
1	3	GABRG2_CG8916_VDRC_9138_mHTT	11.1655	speed
3	3	GABRG2_CG8916_VDRC_9138_mHTT	13.057	speed
4	3	GABRG2_CG8916_VDRC_9138_mHTT	11.1595	speed
5	3	GABRG2_CG8916_VDRC_9138_mHTT	10.6833	speed
6	3	GABRG2_CG8916_VDRC_9138_mHTT	10.5067	speed
7	3	GABRG2_CG8916_VDRC_9138_mHTT	9.15015	speed
8	3	GABRG2_CG8916_VDRC_9138_mHTT	7.58788	speed
10	3	GABRG2_CG8916_VDRC_9138_mHTT	6.75175	speed
1	4	GABRG2_CG8916_VDRC_9138_mHTT	11.6825	speed
3	4	GABRG2_CG8916_VDRC_9138_mHTT	13.138	speed
4	4	GABRG2_CG8916_VDRC_9138_mHTT	12.5788	speed
5	4	GABRG2_CG8916_VDRC_9138_mHTT	11.3026	speed
6	4	GABRG2_CG8916_VDRC_9138_mHTT	10.2599	speed
7	4	GABRG2_CG8916_VDRC_9138_mHTT	8.54797	speed
8	4	GABRG2_CG8916_VDRC_9138_mHTT	7.20354	speed
10	4	GABRG2_CG8916_VDRC_9138_mHTT	6.77482	speed
1	5	GABRG2_CG8916_VDRC_9138_mHTT	12.3516	speed
3	5	GABRG2_CG8916_VDRC_9138_mHTT	10.9538	speed
4	5	GABRG2_CG8916_VDRC_9138_mHTT	11.7266	speed
5	5	GABRG2_CG8916_VDRC_9138_mHTT	9.75881	speed
6	5	GABRG2_CG8916_VDRC_9138_mHTT	8.79091	speed
7	5	GABRG2_CG8916_VDRC_9138_mHTT	7.88693	speed
8	5	GABRG2_CG8916_VDRC_9138_mHTT	7.67301	speed
10	5	GABRG2_CG8916_VDRC_9138_mHTT	6.07543	speed
1	1	GTF3A_CG9609_BDSC_30429_mHTT	11.8507	speed
2	1	GTF3A_CG9609_BDSC_30429_mHTT	12.121	speed
3	1	GTF3A_CG9609_BDSC_30429_mHTT	12.6423	speed
4	1	GTF3A_CG9609_BDSC_30429_mHTT	12.0764	speed
5	1	GTF3A_CG9609_BDSC_30429_mHTT	11.3662	speed
6	1	GTF3A_CG9609_BDSC_30429_mHTT	10.2431	speed
7	1	GTF3A_CG9609_BDSC_30429_mHTT	8.75761	speed
8	1	GTF3A_CG9609_BDSC_30429_mHTT	8.99939	speed
9	1	GTF3A_CG9609_BDSC_30429_mHTT	6.66168	speed
10	1	GTF3A_CG9609_BDSC_30429_mHTT	6.60866	speed
1	2	GTF3A_CG9609_BDSC_30429_mHTT	12.3143	speed
2	2	GTF3A_CG9609_BDSC_30429_mHTT	12.2822	speed
3	2	GTF3A_CG9609_BDSC_30429_mHTT	12.7836	speed
4	2	GTF3A_CG9609_BDSC_30429_mHTT	13.7	speed
5	2	GTF3A_CG9609_BDSC_30429_mHTT	12.4187	speed
6	2	GTF3A_CG9609_BDSC_30429_mHTT	12.0711	speed
7	2	GTF3A_CG9609_BDSC_30429_mHTT	10.4026	speed
8	2	GTF3A_CG9609_BDSC_30429_mHTT	9.83374	speed
9	2	GTF3A_CG9609_BDSC_30429_mHTT	9.11498	speed
10	2	GTF3A_CG9609_BDSC_30429_mHTT	9.69167	speed
1	3	GTF3A_CG9609_BDSC_30429_mHTT	12.7026	speed
2	3	GTF3A_CG9609_BDSC_30429_mHTT	12.7569	speed
3	3	GTF3A_CG9609_BDSC_30429_mHTT	13.5034	speed
4	3	GTF3A_CG9609_BDSC_30429_mHTT	11.6063	speed
5	3	GTF3A_CG9609_BDSC_30429_mHTT	12.1488	speed
6	3	GTF3A_CG9609_BDSC_30429_mHTT	12.1753	speed
7	3	GTF3A_CG9609_BDSC_30429_mHTT	9.31531	speed
8	3	GTF3A_CG9609_BDSC_30429_mHTT	9.30442	speed
9	3	GTF3A_CG9609_BDSC_30429_mHTT	7.75005	speed
10	3	GTF3A_CG9609_BDSC_30429_mHTT	7.42062	speed
1	4	GTF3A_CG9609_BDSC_30429_mHTT	13.5143	speed
2	4	GTF3A_CG9609_BDSC_30429_mHTT	12.4283	speed
3	4	GTF3A_CG9609_BDSC_30429_mHTT	13.7483	speed
4	4	GTF3A_CG9609_BDSC_30429_mHTT	13.0254	speed
5	4	GTF3A_CG9609_BDSC_30429_mHTT	12.6938	speed
6	4	GTF3A_CG9609_BDSC_30429_mHTT	12.0032	speed
7	4	GTF3A_CG9609_BDSC_30429_mHTT	9.76906	speed
8	4	GTF3A_CG9609_BDSC_30429_mHTT	8.96248	speed
9	4	GTF3A_CG9609_BDSC_30429_mHTT	7.48285	speed
10	4	GTF3A_CG9609_BDSC_30429_mHTT	7.57886	speed
1	1	HES1_dpn_BDSC_65295_mHTT	12.7249	speed
2	1	HES1_dpn_BDSC_65295_mHTT	12.6693	speed
3	1	HES1_dpn_BDSC_65295_mHTT	12.5364	speed
4	1	HES1_dpn_BDSC_65295_mHTT	13.4187	speed
5	1	HES1_dpn_BDSC_65295_mHTT	12.4182	speed
6	1	HES1_dpn_BDSC_65295_mHTT	11.7145	speed
7	1	HES1_dpn_BDSC_65295_mHTT	10.3817	speed
8	1	HES1_dpn_BDSC_65295_mHTT	10.3074	speed
9	1	HES1_dpn_BDSC_65295_mHTT	9.80744	speed
10	1	HES1_dpn_BDSC_65295_mHTT	9.71067	speed
1	2	HES1_dpn_BDSC_65295_mHTT	13.1529	speed
2	2	HES1_dpn_BDSC_65295_mHTT	13.3134	speed
3	2	HES1_dpn_BDSC_65295_mHTT	13.5753	speed
4	2	HES1_dpn_BDSC_65295_mHTT	13.2676	speed
5	2	HES1_dpn_BDSC_65295_mHTT	11.9807	speed
6	2	HES1_dpn_BDSC_65295_mHTT	12.4921	speed
7	2	HES1_dpn_BDSC_65295_mHTT	11.0604	speed
8	2	HES1_dpn_BDSC_65295_mHTT	9.09747	speed
9	2	HES1_dpn_BDSC_65295_mHTT	8.12018	speed
10	2	HES1_dpn_BDSC_65295_mHTT	8.21877	speed
1	3	HES1_dpn_BDSC_65295_mHTT	12.8444	speed
2	3	HES1_dpn_BDSC_65295_mHTT	11.8912	speed
3	3	HES1_dpn_BDSC_65295_mHTT	13.2433	speed
4	3	HES1_dpn_BDSC_65295_mHTT	13.0756	speed
5	3	HES1_dpn_BDSC_65295_mHTT	11.6229	speed
6	3	HES1_dpn_BDSC_65295_mHTT	11.0963	speed
7	3	HES1_dpn_BDSC_65295_mHTT	9.94425	speed
8	3	HES1_dpn_BDSC_65295_mHTT	9.58425	speed
9	3	HES1_dpn_BDSC_65295_mHTT	8.50804	speed
10	3	HES1_dpn_BDSC_65295_mHTT	7.95036	speed
1	4	HES1_dpn_BDSC_65295_mHTT	13.6442	speed
2	4	HES1_dpn_BDSC_65295_mHTT	12.8515	speed
3	4	HES1_dpn_BDSC_65295_mHTT	13.3009	speed
4	4	HES1_dpn_BDSC_65295_mHTT	13.5962	speed
5	4	HES1_dpn_BDSC_65295_mHTT	12.3746	speed
6	4	HES1_dpn_BDSC_65295_mHTT	11.4649	speed
7	4	HES1_dpn_BDSC_65295_mHTT	10.2513	speed
8	4	HES1_dpn_BDSC_65295_mHTT	9.51909	speed
9	4	HES1_dpn_BDSC_65295_mHTT	8.03629	speed
10	4	HES1_dpn_BDSC_65295_mHTT	5.2045	speed
1	5	HES1_dpn_BDSC_65295_mHTT	12.6469	speed
2	5	HES1_dpn_BDSC_65295_mHTT	11.3165	speed
3	5	HES1_dpn_BDSC_65295_mHTT	12.945	speed
4	5	HES1_dpn_BDSC_65295_mHTT	11.3158	speed
5	5	HES1_dpn_BDSC_65295_mHTT	11.567	speed
6	5	HES1_dpn_BDSC_65295_mHTT	10.9257	speed
7	5	HES1_dpn_BDSC_65295_mHTT	9.59417	speed
8	5	HES1_dpn_BDSC_65295_mHTT	8.55525	speed
9	5	HES1_dpn_BDSC_65295_mHTT	7.69785	speed
10	5	HES1_dpn_BDSC_65295_mHTT	7.38796	speed
1	1	JUN_jra_NIG_2275R_2__mHTT	13.0142	speed
2	1	JUN_jra_NIG_2275R_2__mHTT	12.7766	speed
3	1	JUN_jra_NIG_2275R_2__mHTT	14.1797	speed
4	1	JUN_jra_NIG_2275R_2__mHTT	14.5118	speed
5	1	JUN_jra_NIG_2275R_2__mHTT	14.3304	speed
6	1	JUN_jra_NIG_2275R_2__mHTT	14.0833	speed
7	1	JUN_jra_NIG_2275R_2__mHTT	13.2972	speed
8	1	JUN_jra_NIG_2275R_2__mHTT	10.8513	speed
9	1	JUN_jra_NIG_2275R_2__mHTT	11.9431	speed
10	1	JUN_jra_NIG_2275R_2__mHTT	11.5586	speed
1	2	JUN_jra_NIG_2275R_2__mHTT	13.1917	speed
2	2	JUN_jra_NIG_2275R_2__mHTT	13.4285	speed
3	2	JUN_jra_NIG_2275R_2__mHTT	13.8856	speed
4	2	JUN_jra_NIG_2275R_2__mHTT	14.9538	speed
5	2	JUN_jra_NIG_2275R_2__mHTT	14.4127	speed
6	2	JUN_jra_NIG_2275R_2__mHTT	14.3066	speed
7	2	JUN_jra_NIG_2275R_2__mHTT	13.9016	speed
8	2	JUN_jra_NIG_2275R_2__mHTT	12.7924	speed
9	2	JUN_jra_NIG_2275R_2__mHTT	12.841	speed
10	2	JUN_jra_NIG_2275R_2__mHTT	12.6508	speed
1	3	JUN_jra_NIG_2275R_2__mHTT	12.973	speed
2	3	JUN_jra_NIG_2275R_2__mHTT	12.9772	speed
3	3	JUN_jra_NIG_2275R_2__mHTT	14.5188	speed
4	3	JUN_jra_NIG_2275R_2__mHTT	13.9246	speed
5	3	JUN_jra_NIG_2275R_2__mHTT	12.9628	speed
6	3	JUN_jra_NIG_2275R_2__mHTT	13.8777	speed
7	3	JUN_jra_NIG_2275R_2__mHTT	13.3247	speed
8	3	JUN_jra_NIG_2275R_2__mHTT	12.8485	speed
9	3	JUN_jra_NIG_2275R_2__mHTT	12.2183	speed
10	3	JUN_jra_NIG_2275R_2__mHTT	13.0751	speed
1	4	JUN_jra_NIG_2275R_2__mHTT	13.2285	speed
2	4	JUN_jra_NIG_2275R_2__mHTT	12.5169	speed
3	4	JUN_jra_NIG_2275R_2__mHTT	13.8348	speed
4	4	JUN_jra_NIG_2275R_2__mHTT	15.0938	speed
5	4	JUN_jra_NIG_2275R_2__mHTT	13.9291	speed
6	4	JUN_jra_NIG_2275R_2__mHTT	14.5506	speed
7	4	JUN_jra_NIG_2275R_2__mHTT	12.9386	speed
8	4	JUN_jra_NIG_2275R_2__mHTT	12.8274	speed
9	4	JUN_jra_NIG_2275R_2__mHTT	13.0528	speed
10	4	JUN_jra_NIG_2275R_2__mHTT	12.6585	speed
1	5	JUN_jra_NIG_2275R_2__mHTT	8.295	speed
2	5	JUN_jra_NIG_2275R_2__mHTT	12.4897	speed
3	5	JUN_jra_NIG_2275R_2__mHTT	13.6867	speed
4	5	JUN_jra_NIG_2275R_2__mHTT	15.4849	speed
5	5	JUN_jra_NIG_2275R_2__mHTT	13.8571	speed
6	5	JUN_jra_NIG_2275R_2__mHTT	13.8034	speed
7	5	JUN_jra_NIG_2275R_2__mHTT	14.5247	speed
8	5	JUN_jra_NIG_2275R_2__mHTT	11.9298	speed
9	5	JUN_jra_NIG_2275R_2__mHTT	11.8863	speed
10	5	JUN_jra_NIG_2275R_2__mHTT	11.1067	speed
1	1	LMO7_CG43427_VDRC_100636_mHTT	13.912	speed
2	1	LMO7_CG43427_VDRC_100636_mHTT	12.3996	speed
3	1	LMO7_CG43427_VDRC_100636_mHTT	15.6802	speed
4	1	LMO7_CG43427_VDRC_100636_mHTT	15.892	speed
5	1	LMO7_CG43427_VDRC_100636_mHTT	14.8056	speed
6	1	LMO7_CG43427_VDRC_100636_mHTT	13.0332	speed
7	1	LMO7_CG43427_VDRC_100636_mHTT	11.4058	speed
8	1	LMO7_CG43427_VDRC_100636_mHTT	10.3997	speed
9	1	LMO7_CG43427_VDRC_100636_mHTT	10.7068	speed
10	1	LMO7_CG43427_VDRC_100636_mHTT	10.0971	speed
1	2	LMO7_CG43427_VDRC_100636_mHTT	12.2685	speed
2	2	LMO7_CG43427_VDRC_100636_mHTT	12.2205	speed
3	2	LMO7_CG43427_VDRC_100636_mHTT	13.2415	speed
4	2	LMO7_CG43427_VDRC_100636_mHTT	14.0027	speed
5	2	LMO7_CG43427_VDRC_100636_mHTT	12.5129	speed
6	2	LMO7_CG43427_VDRC_100636_mHTT	12.223	speed
7	2	LMO7_CG43427_VDRC_100636_mHTT	11.2568	speed
8	2	LMO7_CG43427_VDRC_100636_mHTT	10.8644	speed
9	2	LMO7_CG43427_VDRC_100636_mHTT	10.194	speed
10	2	LMO7_CG43427_VDRC_100636_mHTT	4.8653	speed
1	3	LMO7_CG43427_VDRC_100636_mHTT	7.34797	speed
2	3	LMO7_CG43427_VDRC_100636_mHTT	13.0378	speed
3	3	LMO7_CG43427_VDRC_100636_mHTT	12.4771	speed
4	3	LMO7_CG43427_VDRC_100636_mHTT	11.5027	speed
5	3	LMO7_CG43427_VDRC_100636_mHTT	11.9489	speed
6	3	LMO7_CG43427_VDRC_100636_mHTT	11.226	speed
7	3	LMO7_CG43427_VDRC_100636_mHTT	10.083	speed
8	3	LMO7_CG43427_VDRC_100636_mHTT	9.92873	speed
9	3	LMO7_CG43427_VDRC_100636_mHTT	9.95162	speed
10	3	LMO7_CG43427_VDRC_100636_mHTT	9.51414	speed
1	4	LMO7_CG43427_VDRC_100636_mHTT	12.2278	speed
2	4	LMO7_CG43427_VDRC_100636_mHTT	12.8578	speed
3	4	LMO7_CG43427_VDRC_100636_mHTT	13.8086	speed
4	4	LMO7_CG43427_VDRC_100636_mHTT	13.3487	speed
5	4	LMO7_CG43427_VDRC_100636_mHTT	12.5661	speed
6	4	LMO7_CG43427_VDRC_100636_mHTT	12.4653	speed
7	4	LMO7_CG43427_VDRC_100636_mHTT	11.4924	speed
8	4	LMO7_CG43427_VDRC_100636_mHTT	10.3081	speed
9	4	LMO7_CG43427_VDRC_100636_mHTT	9.08776	speed
10	4	LMO7_CG43427_VDRC_100636_mHTT	9.11699	speed
1	5	LMO7_CG43427_VDRC_100636_mHTT	12.1447	speed
2	5	LMO7_CG43427_VDRC_100636_mHTT	13.4015	speed
3	5	LMO7_CG43427_VDRC_100636_mHTT	14.3172	speed
4	5	LMO7_CG43427_VDRC_100636_mHTT	14.0744	speed
5	5	LMO7_CG43427_VDRC_100636_mHTT	13.3606	speed
6	5	LMO7_CG43427_VDRC_100636_mHTT	13.4996	speed
7	5	LMO7_CG43427_VDRC_100636_mHTT	11.3803	speed
8	5	LMO7_CG43427_VDRC_100636_mHTT	10.1393	speed
9	5	LMO7_CG43427_VDRC_100636_mHTT	9.60012	speed
10	5	LMO7_CG43427_VDRC_100636_mHTT	9.4151	speed
1	6	LMO7_CG43427_VDRC_100636_mHTT	12.977	speed
2	6	LMO7_CG43427_VDRC_100636_mHTT	11.5073	speed
3	6	LMO7_CG43427_VDRC_100636_mHTT	12.5419	speed
4	6	LMO7_CG43427_VDRC_100636_mHTT	13.7439	speed
5	6	LMO7_CG43427_VDRC_100636_mHTT	11.2119	speed
6	6	LMO7_CG43427_VDRC_100636_mHTT	11.6773	speed
7	6	LMO7_CG43427_VDRC_100636_mHTT	9.25024	speed
8	6	LMO7_CG43427_VDRC_100636_mHTT	8.86804	speed
9	6	LMO7_CG43427_VDRC_100636_mHTT	7.79946	speed
10	6	LMO7_CG43427_VDRC_100636_mHTT	8.17481	speed
1	1	MAP4K_msn_P6C6_mHTT	12.5633	speed
3	1	MAP4K_msn_P6C6_mHTT	13.7984	speed
4	1	MAP4K_msn_P6C6_mHTT	12.2961	speed
5	1	MAP4K_msn_P6C6_mHTT	11.8085	speed
6	1	MAP4K_msn_P6C6_mHTT	10.6886	speed
7	1	MAP4K_msn_P6C6_mHTT	9.32844	speed
8	1	MAP4K_msn_P6C6_mHTT	8.45936	speed
10	1	MAP4K_msn_P6C6_mHTT	8.25725	speed
1	2	MAP4K_msn_P6C6_mHTT	13.369	speed
3	2	MAP4K_msn_P6C6_mHTT	13.5166	speed
4	2	MAP4K_msn_P6C6_mHTT	13.5861	speed
5	2	MAP4K_msn_P6C6_mHTT	11.707	speed
6	2	MAP4K_msn_P6C6_mHTT	10.8823	speed
7	2	MAP4K_msn_P6C6_mHTT	9.43984	speed
8	2	MAP4K_msn_P6C6_mHTT	7.38245	speed
10	2	MAP4K_msn_P6C6_mHTT	7.03054	speed
1	3	MAP4K_msn_P6C6_mHTT	13.1532	speed
3	3	MAP4K_msn_P6C6_mHTT	13.4748	speed
4	3	MAP4K_msn_P6C6_mHTT	12.5431	speed
5	3	MAP4K_msn_P6C6_mHTT	11.8128	speed
6	3	MAP4K_msn_P6C6_mHTT	10.1454	speed
7	3	MAP4K_msn_P6C6_mHTT	9.41559	speed
8	3	MAP4K_msn_P6C6_mHTT	8.06269	speed
10	3	MAP4K_msn_P6C6_mHTT	7.68983	speed
1	4	MAP4K_msn_P6C6_mHTT	12.7155	speed
3	4	MAP4K_msn_P6C6_mHTT	13.417	speed
4	4	MAP4K_msn_P6C6_mHTT	13.1653	speed
5	4	MAP4K_msn_P6C6_mHTT	11.3243	speed
6	4	MAP4K_msn_P6C6_mHTT	11.0307	speed
7	4	MAP4K_msn_P6C6_mHTT	5.04384	speed
8	4	MAP4K_msn_P6C6_mHTT	7.76737	speed
10	4	MAP4K_msn_P6C6_mHTT	7.54103	speed
1	5	MAP4K_msn_P6C6_mHTT	12.6338	speed
3	5	MAP4K_msn_P6C6_mHTT	12.8985	speed
4	5	MAP4K_msn_P6C6_mHTT	11.1438	speed
5	5	MAP4K_msn_P6C6_mHTT	9.62557	speed
6	5	MAP4K_msn_P6C6_mHTT	8.33587	speed
7	5	MAP4K_msn_P6C6_mHTT	8.39606	speed
8	5	MAP4K_msn_P6C6_mHTT	7.47609	speed
10	5	MAP4K_msn_P6C6_mHTT	7.00579	speed
1	1	NME7_nmdyn_D7_VDRC_35901_mHTT	13.8672	speed
3	1	NME7_nmdyn_D7_VDRC_35901_mHTT	14.0822	speed
4	1	NME7_nmdyn_D7_VDRC_35901_mHTT	13.2503	speed
5	1	NME7_nmdyn_D7_VDRC_35901_mHTT	11.8585	speed
6	1	NME7_nmdyn_D7_VDRC_35901_mHTT	10.3662	speed
7	1	NME7_nmdyn_D7_VDRC_35901_mHTT	10.6596	speed
8	1	NME7_nmdyn_D7_VDRC_35901_mHTT	8.6688	speed
10	1	NME7_nmdyn_D7_VDRC_35901_mHTT	7.53171	speed
1	2	NME7_nmdyn_D7_VDRC_35901_mHTT	13.8644	speed
3	2	NME7_nmdyn_D7_VDRC_35901_mHTT	14.7208	speed
4	2	NME7_nmdyn_D7_VDRC_35901_mHTT	13.5822	speed
5	2	NME7_nmdyn_D7_VDRC_35901_mHTT	11.3886	speed
6	2	NME7_nmdyn_D7_VDRC_35901_mHTT	10.4687	speed
7	2	NME7_nmdyn_D7_VDRC_35901_mHTT	8.94685	speed
8	2	NME7_nmdyn_D7_VDRC_35901_mHTT	8.42123	speed
10	2	NME7_nmdyn_D7_VDRC_35901_mHTT	7.90303	speed
1	3	NME7_nmdyn_D7_VDRC_35901_mHTT	13.962	speed
3	3	NME7_nmdyn_D7_VDRC_35901_mHTT	15.0049	speed
4	3	NME7_nmdyn_D7_VDRC_35901_mHTT	13.8243	speed
5	3	NME7_nmdyn_D7_VDRC_35901_mHTT	12.6774	speed
6	3	NME7_nmdyn_D7_VDRC_35901_mHTT	11.4565	speed
7	3	NME7_nmdyn_D7_VDRC_35901_mHTT	12.0538	speed
8	3	NME7_nmdyn_D7_VDRC_35901_mHTT	10.3691	speed
10	3	NME7_nmdyn_D7_VDRC_35901_mHTT	8.71389	speed
1	4	NME7_nmdyn_D7_VDRC_35901_mHTT	13.0383	speed
3	4	NME7_nmdyn_D7_VDRC_35901_mHTT	14.1487	speed
4	4	NME7_nmdyn_D7_VDRC_35901_mHTT	13.6392	speed
5	4	NME7_nmdyn_D7_VDRC_35901_mHTT	11.1182	speed
6	4	NME7_nmdyn_D7_VDRC_35901_mHTT	9.75969	speed
7	4	NME7_nmdyn_D7_VDRC_35901_mHTT	10.1219	speed
8	4	NME7_nmdyn_D7_VDRC_35901_mHTT	8.0223	speed
10	4	NME7_nmdyn_D7_VDRC_35901_mHTT	7.59709	speed
1	5	NME7_nmdyn_D7_VDRC_35901_mHTT	12.4024	speed
3	5	NME7_nmdyn_D7_VDRC_35901_mHTT	14.706	speed
4	5	NME7_nmdyn_D7_VDRC_35901_mHTT	13.2523	speed
5	5	NME7_nmdyn_D7_VDRC_35901_mHTT	11.4532	speed
6	5	NME7_nmdyn_D7_VDRC_35901_mHTT	9.58056	speed
7	5	NME7_nmdyn_D7_VDRC_35901_mHTT	7.41288	speed
8	5	NME7_nmdyn_D7_VDRC_35901_mHTT	7.50539	speed
10	5	NME7_nmdyn_D7_VDRC_35901_mHTT	5.77532	speed
1	6	NME7_nmdyn_D7_VDRC_35901_mHTT	14.309	speed
2	6	NME7_nmdyn_D7_VDRC_35901_mHTT	13.3436	speed
3	6	NME7_nmdyn_D7_VDRC_35901_mHTT	13.6552	speed
4	6	NME7_nmdyn_D7_VDRC_35901_mHTT	12.9009	speed
5	6	NME7_nmdyn_D7_VDRC_35901_mHTT	12.4882	speed
6	6	NME7_nmdyn_D7_VDRC_35901_mHTT	12.064	speed
7	6	NME7_nmdyn_D7_VDRC_35901_mHTT	9.85467	speed
8	6	NME7_nmdyn_D7_VDRC_35901_mHTT	8.97467	speed
9	6	NME7_nmdyn_D7_VDRC_35901_mHTT	9.05744	speed
10	6	NME7_nmdyn_D7_VDRC_35901_mHTT	4.67842	speed
1	7	NME7_nmdyn_D7_VDRC_35901_mHTT	14.7305	speed
2	7	NME7_nmdyn_D7_VDRC_35901_mHTT	15.074	speed
3	7	NME7_nmdyn_D7_VDRC_35901_mHTT	14.3307	speed
4	7	NME7_nmdyn_D7_VDRC_35901_mHTT	13.2506	speed
5	7	NME7_nmdyn_D7_VDRC_35901_mHTT	12.6273	speed
6	7	NME7_nmdyn_D7_VDRC_35901_mHTT	10.1593	speed
7	7	NME7_nmdyn_D7_VDRC_35901_mHTT	9.1609	speed
8	7	NME7_nmdyn_D7_VDRC_35901_mHTT	8.50905	speed
9	7	NME7_nmdyn_D7_VDRC_35901_mHTT	9.97642	speed
1	1	Non_targeting_hpRNA_VDRC_13974_mHTT	13.4893	speed
2	1	Non_targeting_hpRNA_VDRC_13974_mHTT	11.7209	speed
3	1	Non_targeting_hpRNA_VDRC_13974_mHTT	13.0647	speed
4	1	Non_targeting_hpRNA_VDRC_13974_mHTT	11.2553	speed
5	1	Non_targeting_hpRNA_VDRC_13974_mHTT	10.5882	speed
6	1	Non_targeting_hpRNA_VDRC_13974_mHTT	8.47771	speed
7	1	Non_targeting_hpRNA_VDRC_13974_mHTT	5.13439	speed
8	1	Non_targeting_hpRNA_VDRC_13974_mHTT	7.56117	speed
9	1	Non_targeting_hpRNA_VDRC_13974_mHTT		speed
10	1	Non_targeting_hpRNA_VDRC_13974_mHTT		speed
1	2	Non_targeting_hpRNA_VDRC_13974_mHTT	9.33197	speed
1	3	Non_targeting_hpRNA_VDRC_13974_mHTT	11.2318	speed
2	2	Non_targeting_hpRNA_VDRC_13974_mHTT	8.73295	speed
2	3	Non_targeting_hpRNA_VDRC_13974_mHTT	9.36737	speed
3	2	Non_targeting_hpRNA_VDRC_13974_mHTT	8.23746	speed
3	3	Non_targeting_hpRNA_VDRC_13974_mHTT	9.14091	speed
4	2	Non_targeting_hpRNA_VDRC_13974_mHTT	7.81995	speed
4	3	Non_targeting_hpRNA_VDRC_13974_mHTT	8.36639	speed
5	2	Non_targeting_hpRNA_VDRC_13974_mHTT	6.70907	speed
5	3	Non_targeting_hpRNA_VDRC_13974_mHTT	6.15803	speed
6	2	Non_targeting_hpRNA_VDRC_13974_mHTT	5.89128	speed
6	3	Non_targeting_hpRNA_VDRC_13974_mHTT	7.60652	speed
7	2	Non_targeting_hpRNA_VDRC_13974_mHTT	3.89438	speed
7	3	Non_targeting_hpRNA_VDRC_13974_mHTT	5.71921	speed
8	2	Non_targeting_hpRNA_VDRC_13974_mHTT	3.92795	speed
8	3	Non_targeting_hpRNA_VDRC_13974_mHTT	5.20582	speed
9	2	Non_targeting_hpRNA_VDRC_13974_mHTT	4.81987	speed
9	3	Non_targeting_hpRNA_VDRC_13974_mHTT	4.19088	speed
1	4	Non_targeting_hpRNA_VDRC_13974_mHTT	12.6572	speed
2	4	Non_targeting_hpRNA_VDRC_13974_mHTT	12.7542	speed
3	4	Non_targeting_hpRNA_VDRC_13974_mHTT	12.1557	speed
4	4	Non_targeting_hpRNA_VDRC_13974_mHTT	11.3481	speed
5	4	Non_targeting_hpRNA_VDRC_13974_mHTT	10.6394	speed
6	4	Non_targeting_hpRNA_VDRC_13974_mHTT	8.08123	speed
7	4	Non_targeting_hpRNA_VDRC_13974_mHTT	6.96912	speed
8	4	Non_targeting_hpRNA_VDRC_13974_mHTT	5.99274	speed
9	4	Non_targeting_hpRNA_VDRC_13974_mHTT	6.60172	speed
1	1	PLXNA2_plexA_NIG_11081R_2_mHTT	14.0343	speed
3	1	PLXNA2_plexA_NIG_11081R_2_mHTT	15.2284	speed
4	1	PLXNA2_plexA_NIG_11081R_2_mHTT	16.3381	speed
5	1	PLXNA2_plexA_NIG_11081R_2_mHTT	13.4539	speed
6	1	PLXNA2_plexA_NIG_11081R_2_mHTT	13.1336	speed
7	1	PLXNA2_plexA_NIG_11081R_2_mHTT	11.9012	speed
8	1	PLXNA2_plexA_NIG_11081R_2_mHTT	8.46208	speed
10	1	PLXNA2_plexA_NIG_11081R_2_mHTT	8.43901	speed
1	2	PLXNA2_plexA_NIG_11081R_2_mHTT	14.262	speed
3	2	PLXNA2_plexA_NIG_11081R_2_mHTT	15.0062	speed
4	2	PLXNA2_plexA_NIG_11081R_2_mHTT	15.749	speed
5	2	PLXNA2_plexA_NIG_11081R_2_mHTT	13.9462	speed
6	2	PLXNA2_plexA_NIG_11081R_2_mHTT	12.4106	speed
7	2	PLXNA2_plexA_NIG_11081R_2_mHTT	12.7959	speed
8	2	PLXNA2_plexA_NIG_11081R_2_mHTT	11.1331	speed
10	2	PLXNA2_plexA_NIG_11081R_2_mHTT	10.4264	speed
1	3	PLXNA2_plexA_NIG_11081R_2_mHTT	13.4298	speed
3	3	PLXNA2_plexA_NIG_11081R_2_mHTT	14.5464	speed
4	3	PLXNA2_plexA_NIG_11081R_2_mHTT	14.6718	speed
5	3	PLXNA2_plexA_NIG_11081R_2_mHTT	14.4188	speed
6	3	PLXNA2_plexA_NIG_11081R_2_mHTT	13.8435	speed
7	3	PLXNA2_plexA_NIG_11081R_2_mHTT	12.7469	speed
8	3	PLXNA2_plexA_NIG_11081R_2_mHTT	10.5261	speed
10	3	PLXNA2_plexA_NIG_11081R_2_mHTT	8.51573	speed
1	4	PLXNA2_plexA_NIG_11081R_2_mHTT	13.5553	speed
3	4	PLXNA2_plexA_NIG_11081R_2_mHTT	14.5245	speed
4	4	PLXNA2_plexA_NIG_11081R_2_mHTT	16.2277	speed
5	4	PLXNA2_plexA_NIG_11081R_2_mHTT	13.3195	speed
6	4	PLXNA2_plexA_NIG_11081R_2_mHTT	12.5451	speed
7	4	PLXNA2_plexA_NIG_11081R_2_mHTT	12.5307	speed
8	4	PLXNA2_plexA_NIG_11081R_2_mHTT	11.3967	speed
10	4	PLXNA2_plexA_NIG_11081R_2_mHTT	9.22432	speed
1	5	PLXNA2_plexA_NIG_11081R_2_mHTT	13.0908	speed
3	5	PLXNA2_plexA_NIG_11081R_2_mHTT	14.148	speed
4	5	PLXNA2_plexA_NIG_11081R_2_mHTT	14.1545	speed
5	5	PLXNA2_plexA_NIG_11081R_2_mHTT	13.1774	speed
6	5	PLXNA2_plexA_NIG_11081R_2_mHTT	13.002	speed
7	5	PLXNA2_plexA_NIG_11081R_2_mHTT	12.7557	speed
8	5	PLXNA2_plexA_NIG_11081R_2_mHTT	7.9107	speed
10	5	PLXNA2_plexA_NIG_11081R_2_mHTT	10.5527	speed
1	1	PRKCA_pkc53e_VDRC_27699_mHTT	13.6596	speed
3	1	PRKCA_pkc53e_VDRC_27699_mHTT	13.7934	speed
4	1	PRKCA_pkc53e_VDRC_27699_mHTT	12.9731	speed
5	1	PRKCA_pkc53e_VDRC_27699_mHTT	10.5551	speed
6	1	PRKCA_pkc53e_VDRC_27699_mHTT	9.37258	speed
7	1	PRKCA_pkc53e_VDRC_27699_mHTT	8.80386	speed
8	1	PRKCA_pkc53e_VDRC_27699_mHTT	6.68497	speed
10	1	PRKCA_pkc53e_VDRC_27699_mHTT	6.06552	speed
1	2	PRKCA_pkc53e_VDRC_27699_mHTT	13.1515	speed
3	2	PRKCA_pkc53e_VDRC_27699_mHTT	13.6902	speed
4	2	PRKCA_pkc53e_VDRC_27699_mHTT	12.396	speed
5	2	PRKCA_pkc53e_VDRC_27699_mHTT	10.9118	speed
6	2	PRKCA_pkc53e_VDRC_27699_mHTT	9.18886	speed
7	2	PRKCA_pkc53e_VDRC_27699_mHTT	7.0607	speed
8	2	PRKCA_pkc53e_VDRC_27699_mHTT	4.8677	speed
10	2	PRKCA_pkc53e_VDRC_27699_mHTT	5.98547	speed
1	3	PRKCA_pkc53e_VDRC_27699_mHTT	12.9374	speed
3	3	PRKCA_pkc53e_VDRC_27699_mHTT	14.3288	speed
4	3	PRKCA_pkc53e_VDRC_27699_mHTT	12.4141	speed
5	3	PRKCA_pkc53e_VDRC_27699_mHTT	10.7234	speed
6	3	PRKCA_pkc53e_VDRC_27699_mHTT	9.99089	speed
7	3	PRKCA_pkc53e_VDRC_27699_mHTT	7.82961	speed
8	3	PRKCA_pkc53e_VDRC_27699_mHTT	5.53941	speed
10	3	PRKCA_pkc53e_VDRC_27699_mHTT	5.78808	speed
1	4	PRKCA_pkc53e_VDRC_27699_mHTT	14.0659	speed
3	4	PRKCA_pkc53e_VDRC_27699_mHTT	13.2193	speed
4	4	PRKCA_pkc53e_VDRC_27699_mHTT	12.7101	speed
5	4	PRKCA_pkc53e_VDRC_27699_mHTT	10.8382	speed
6	4	PRKCA_pkc53e_VDRC_27699_mHTT	9.61254	speed
7	4	PRKCA_pkc53e_VDRC_27699_mHTT	8.64696	speed
8	4	PRKCA_pkc53e_VDRC_27699_mHTT	7.8852	speed
10	4	PRKCA_pkc53e_VDRC_27699_mHTT	6.30148	speed
1	5	PRKCA_pkc53e_VDRC_27699_mHTT	12.6448	speed
3	5	PRKCA_pkc53e_VDRC_27699_mHTT	12.523	speed
4	5	PRKCA_pkc53e_VDRC_27699_mHTT	12.1569	speed
5	5	PRKCA_pkc53e_VDRC_27699_mHTT	10.0116	speed
6	5	PRKCA_pkc53e_VDRC_27699_mHTT	8.36531	speed
7	5	PRKCA_pkc53e_VDRC_27699_mHTT	8.00022	speed
8	5	PRKCA_pkc53e_VDRC_27699_mHTT	6.36754	speed
10	5	PRKCA_pkc53e_VDRC_27699_mHTT	5.99578	speed
1	1	RHOBTB2_RhoBTB_VDRC_330130_mHTT	11.9238	speed
2	1	RHOBTB2_RhoBTB_VDRC_330130_mHTT	12.437	speed
3	1	RHOBTB2_RhoBTB_VDRC_330130_mHTT	12.7772	speed
4	1	RHOBTB2_RhoBTB_VDRC_330130_mHTT	12.8797	speed
5	1	RHOBTB2_RhoBTB_VDRC_330130_mHTT	12.1447	speed
6	1	RHOBTB2_RhoBTB_VDRC_330130_mHTT	12.0533	speed
7	1	RHOBTB2_RhoBTB_VDRC_330130_mHTT	9.85066	speed
8	1	RHOBTB2_RhoBTB_VDRC_330130_mHTT	9.1587	speed
9	1	RHOBTB2_RhoBTB_VDRC_330130_mHTT	8.22803	speed
10	1	RHOBTB2_RhoBTB_VDRC_330130_mHTT	7.95441	speed
1	2	RHOBTB2_RhoBTB_VDRC_330130_mHTT	12.5306	speed
2	2	RHOBTB2_RhoBTB_VDRC_330130_mHTT	12.4622	speed
3	2	RHOBTB2_RhoBTB_VDRC_330130_mHTT	14.2406	speed
4	2	RHOBTB2_RhoBTB_VDRC_330130_mHTT	13.7819	speed
5	2	RHOBTB2_RhoBTB_VDRC_330130_mHTT	13.4759	speed
6	2	RHOBTB2_RhoBTB_VDRC_330130_mHTT	12.1293	speed
7	2	RHOBTB2_RhoBTB_VDRC_330130_mHTT	10.7288	speed
8	2	RHOBTB2_RhoBTB_VDRC_330130_mHTT	9.36614	speed
9	2	RHOBTB2_RhoBTB_VDRC_330130_mHTT	8.79709	speed
10	2	RHOBTB2_RhoBTB_VDRC_330130_mHTT	9.07174	speed
1	3	RHOBTB2_RhoBTB_VDRC_330130_mHTT	13.2815	speed
2	3	RHOBTB2_RhoBTB_VDRC_330130_mHTT	11.9917	speed
3	3	RHOBTB2_RhoBTB_VDRC_330130_mHTT	12.1046	speed
4	3	RHOBTB2_RhoBTB_VDRC_330130_mHTT	12.4587	speed
5	3	RHOBTB2_RhoBTB_VDRC_330130_mHTT	11.1223	speed
6	3	RHOBTB2_RhoBTB_VDRC_330130_mHTT	11.7614	speed
7	3	RHOBTB2_RhoBTB_VDRC_330130_mHTT	9.35613	speed
8	3	RHOBTB2_RhoBTB_VDRC_330130_mHTT	8.0893	speed
9	3	RHOBTB2_RhoBTB_VDRC_330130_mHTT	8.21445	speed
10	3	RHOBTB2_RhoBTB_VDRC_330130_mHTT	7.91474	speed
1	4	RHOBTB2_RhoBTB_VDRC_330130_mHTT	13.2375	speed
2	4	RHOBTB2_RhoBTB_VDRC_330130_mHTT	13.3494	speed
3	4	RHOBTB2_RhoBTB_VDRC_330130_mHTT	12.9604	speed
4	4	RHOBTB2_RhoBTB_VDRC_330130_mHTT	12.4292	speed
5	4	RHOBTB2_RhoBTB_VDRC_330130_mHTT	12.8983	speed
6	4	RHOBTB2_RhoBTB_VDRC_330130_mHTT	13.0151	speed
7	4	RHOBTB2_RhoBTB_VDRC_330130_mHTT	10.2539	speed
8	4	RHOBTB2_RhoBTB_VDRC_330130_mHTT	9.13304	speed
9	4	RHOBTB2_RhoBTB_VDRC_330130_mHTT	9.74296	speed
10	4	RHOBTB2_RhoBTB_VDRC_330130_mHTT	8.61717	speed
1	5	RHOBTB2_RhoBTB_VDRC_330130_mHTT	12.7974	speed
2	5	RHOBTB2_RhoBTB_VDRC_330130_mHTT	13.2956	speed
3	5	RHOBTB2_RhoBTB_VDRC_330130_mHTT	14.1768	speed
4	5	RHOBTB2_RhoBTB_VDRC_330130_mHTT	13.3211	speed
5	5	RHOBTB2_RhoBTB_VDRC_330130_mHTT	13.1108	speed
6	5	RHOBTB2_RhoBTB_VDRC_330130_mHTT	13.1415	speed
7	5	RHOBTB2_RhoBTB_VDRC_330130_mHTT	6.29604	speed
8	5	RHOBTB2_RhoBTB_VDRC_330130_mHTT	8.7993	speed
9	5	RHOBTB2_RhoBTB_VDRC_330130_mHTT	7.0945	speed
10	5	RHOBTB2_RhoBTB_VDRC_330130_mHTT	7.37856	speed
1	1	RXRA_usp_BDSC_30231_mHTT	14.2593	speed
3	1	RXRA_usp_BDSC_30231_mHTT	13.9434	speed
4	1	RXRA_usp_BDSC_30231_mHTT	14.6461	speed
5	1	RXRA_usp_BDSC_30231_mHTT	13.2968	speed
6	1	RXRA_usp_BDSC_30231_mHTT	13.3391	speed
7	1	RXRA_usp_BDSC_30231_mHTT	12.993	speed
8	1	RXRA_usp_BDSC_30231_mHTT	10.9863	speed
10	1	RXRA_usp_BDSC_30231_mHTT	10.5613	speed
1	2	RXRA_usp_BDSC_30231_mHTT	13.0003	speed
3	2	RXRA_usp_BDSC_30231_mHTT	14.2241	speed
4	2	RXRA_usp_BDSC_30231_mHTT	13.7689	speed
5	2	RXRA_usp_BDSC_30231_mHTT	12.9033	speed
6	2	RXRA_usp_BDSC_30231_mHTT	12.3102	speed
7	2	RXRA_usp_BDSC_30231_mHTT	11.5607	speed
8	2	RXRA_usp_BDSC_30231_mHTT	9.82062	speed
10	2	RXRA_usp_BDSC_30231_mHTT	8.77253	speed
1	3	RXRA_usp_BDSC_30231_mHTT	13.1672	speed
3	3	RXRA_usp_BDSC_30231_mHTT	13.1892	speed
4	3	RXRA_usp_BDSC_30231_mHTT	13.4643	speed
5	3	RXRA_usp_BDSC_30231_mHTT	11.9145	speed
6	3	RXRA_usp_BDSC_30231_mHTT	11.8546	speed
7	3	RXRA_usp_BDSC_30231_mHTT	6.85177	speed
8	3	RXRA_usp_BDSC_30231_mHTT	9.56454	speed
10	3	RXRA_usp_BDSC_30231_mHTT	9.15067	speed
1	4	RXRA_usp_BDSC_30231_mHTT	13.6203	speed
3	4	RXRA_usp_BDSC_30231_mHTT	14.7104	speed
4	4	RXRA_usp_BDSC_30231_mHTT	15.1728	speed
5	4	RXRA_usp_BDSC_30231_mHTT	13.4134	speed
6	4	RXRA_usp_BDSC_30231_mHTT	12.396	speed
7	4	RXRA_usp_BDSC_30231_mHTT	11.4883	speed
8	4	RXRA_usp_BDSC_30231_mHTT	9.69736	speed
10	4	RXRA_usp_BDSC_30231_mHTT	8.7656	speed
1	5	RXRA_usp_BDSC_30231_mHTT	13.0403	speed
3	5	RXRA_usp_BDSC_30231_mHTT	14.0904	speed
4	5	RXRA_usp_BDSC_30231_mHTT	15.1121	speed
5	5	RXRA_usp_BDSC_30231_mHTT	12.5808	speed
6	5	RXRA_usp_BDSC_30231_mHTT	12.1799	speed
7	5	RXRA_usp_BDSC_30231_mHTT	10.9564	speed
8	5	RXRA_usp_BDSC_30231_mHTT	10.0017	speed
10	5	RXRA_usp_BDSC_30231_mHTT	8.70718	speed
1	1	SEPT7_pnut_VDRC_330130_mHTT	13.2345	speed
3	1	SEPT7_pnut_VDRC_330130_mHTT	14.7259	speed
4	1	SEPT7_pnut_VDRC_330130_mHTT	13.8208	speed
5	1	SEPT7_pnut_VDRC_330130_mHTT	13.5416	speed
6	1	SEPT7_pnut_VDRC_330130_mHTT	11.9509	speed
7	1	SEPT7_pnut_VDRC_330130_mHTT	10.8162	speed
8	1	SEPT7_pnut_VDRC_330130_mHTT	9.23664	speed
10	1	SEPT7_pnut_VDRC_330130_mHTT	7.18136	speed
1	2	SEPT7_pnut_VDRC_330130_mHTT	12.0856	speed
3	2	SEPT7_pnut_VDRC_330130_mHTT	15.6445	speed
4	2	SEPT7_pnut_VDRC_330130_mHTT	16.4094	speed
5	2	SEPT7_pnut_VDRC_330130_mHTT	14.7818	speed
6	2	SEPT7_pnut_VDRC_330130_mHTT	13.6566	speed
7	2	SEPT7_pnut_VDRC_330130_mHTT	12.7027	speed
8	2	SEPT7_pnut_VDRC_330130_mHTT	8.78578	speed
10	2	SEPT7_pnut_VDRC_330130_mHTT	9.56824	speed
1	3	SEPT7_pnut_VDRC_330130_mHTT	12.8063	speed
3	3	SEPT7_pnut_VDRC_330130_mHTT	9.46623	speed
4	3	SEPT7_pnut_VDRC_330130_mHTT	11.5052	speed
5	3	SEPT7_pnut_VDRC_330130_mHTT	14.162	speed
6	3	SEPT7_pnut_VDRC_330130_mHTT	13.3383	speed
7	3	SEPT7_pnut_VDRC_330130_mHTT	12.0177	speed
8	3	SEPT7_pnut_VDRC_330130_mHTT	10.2357	speed
10	3	SEPT7_pnut_VDRC_330130_mHTT	8.67599	speed
1	4	SEPT7_pnut_VDRC_330130_mHTT	13.8342	speed
3	4	SEPT7_pnut_VDRC_330130_mHTT	14.3404	speed
4	4	SEPT7_pnut_VDRC_330130_mHTT	15.5513	speed
5	4	SEPT7_pnut_VDRC_330130_mHTT	13.4994	speed
6	4	SEPT7_pnut_VDRC_330130_mHTT	11.2195	speed
7	4	SEPT7_pnut_VDRC_330130_mHTT	12.0672	speed
8	4	SEPT7_pnut_VDRC_330130_mHTT	10.7	speed
10	4	SEPT7_pnut_VDRC_330130_mHTT	9.19817	speed
1	5	SEPT7_pnut_VDRC_330130_mHTT	13.3352	speed
3	5	SEPT7_pnut_VDRC_330130_mHTT	14.4611	speed
4	5	SEPT7_pnut_VDRC_330130_mHTT	16.18	speed
5	5	SEPT7_pnut_VDRC_330130_mHTT	13.6835	speed
6	5	SEPT7_pnut_VDRC_330130_mHTT	13.2982	speed
7	5	SEPT7_pnut_VDRC_330130_mHTT	11.5352	speed
8	5	SEPT7_pnut_VDRC_330130_mHTT	8.92768	speed
10	5	SEPT7_pnut_VDRC_330130_mHTT	9.76198	speed
1	1	SERPINA1_spn42De_VDRC_102622_mHTT	13.0628	speed
3	1	SERPINA1_spn42De_VDRC_102622_mHTT	12.7137	speed
4	1	SERPINA1_spn42De_VDRC_102622_mHTT	12.3579	speed
5	1	SERPINA1_spn42De_VDRC_102622_mHTT	9.80396	speed
6	1	SERPINA1_spn42De_VDRC_102622_mHTT	8.87489	speed
7	1	SERPINA1_spn42De_VDRC_102622_mHTT	7.93291	speed
8	1	SERPINA1_spn42De_VDRC_102622_mHTT	5.30451	speed
10	1	SERPINA1_spn42De_VDRC_102622_mHTT	5.50929	speed
1	2	SERPINA1_spn42De_VDRC_102622_mHTT	13.783	speed
3	2	SERPINA1_spn42De_VDRC_102622_mHTT	11.8702	speed
4	2	SERPINA1_spn42De_VDRC_102622_mHTT	13.186	speed
5	2	SERPINA1_spn42De_VDRC_102622_mHTT	11.395	speed
6	2	SERPINA1_spn42De_VDRC_102622_mHTT	10.1613	speed
7	2	SERPINA1_spn42De_VDRC_102622_mHTT	9.07307	speed
8	2	SERPINA1_spn42De_VDRC_102622_mHTT	6.01743	speed
10	2	SERPINA1_spn42De_VDRC_102622_mHTT	7.04841	speed
1	3	SERPINA1_spn42De_VDRC_102622_mHTT	12.9366	speed
3	3	SERPINA1_spn42De_VDRC_102622_mHTT	13.6852	speed
4	3	SERPINA1_spn42De_VDRC_102622_mHTT	13.2013	speed
5	3	SERPINA1_spn42De_VDRC_102622_mHTT	11.6162	speed
6	3	SERPINA1_spn42De_VDRC_102622_mHTT	10.1259	speed
7	3	SERPINA1_spn42De_VDRC_102622_mHTT	9.01279	speed
8	3	SERPINA1_spn42De_VDRC_102622_mHTT	7.83604	speed
10	3	SERPINA1_spn42De_VDRC_102622_mHTT	6.52343	speed
1	4	SERPINA1_spn42De_VDRC_102622_mHTT	14.9697	speed
2	4	SERPINA1_spn42De_VDRC_102622_mHTT	14.9123	speed
3	4	SERPINA1_spn42De_VDRC_102622_mHTT	15.0024	speed
4	4	SERPINA1_spn42De_VDRC_102622_mHTT	12.3693	speed
5	4	SERPINA1_spn42De_VDRC_102622_mHTT	12.4343	speed
6	4	SERPINA1_spn42De_VDRC_102622_mHTT	9.59329	speed
7	4	SERPINA1_spn42De_VDRC_102622_mHTT	8.96187	speed
8	4	SERPINA1_spn42De_VDRC_102622_mHTT	6.81296	speed
9	4	SERPINA1_spn42De_VDRC_102622_mHTT	7.44442	speed
1	5	SERPINA1_spn42De_VDRC_102622_mHTT	13.0327	speed
2	5	SERPINA1_spn42De_VDRC_102622_mHTT	13.4602	speed
3	5	SERPINA1_spn42De_VDRC_102622_mHTT	13.9651	speed
4	5	SERPINA1_spn42De_VDRC_102622_mHTT	12.5514	speed
5	5	SERPINA1_spn42De_VDRC_102622_mHTT	8.44096	speed
6	5	SERPINA1_spn42De_VDRC_102622_mHTT	10.6439	speed
7	5	SERPINA1_spn42De_VDRC_102622_mHTT	8.25207	speed
8	5	SERPINA1_spn42De_VDRC_102622_mHTT	6.54012	speed
9	5	SERPINA1_spn42De_VDRC_102622_mHTT	6.32131	speed
1	1	siHTT_mHTT	12.2787	speed
3	1	siHTT_mHTT	12.5076	speed
4	1	siHTT_mHTT	13.3406	speed
5	1	siHTT_mHTT	11.9504	speed
6	1	siHTT_mHTT	12.1908	speed
7	1	siHTT_mHTT	11.7322	speed
8	1	siHTT_mHTT	11.0121	speed
10	1	siHTT_mHTT	10.4858	speed
1	2	siHTT_mHTT	12.8793	speed
3	2	siHTT_mHTT	12.1785	speed
4	2	siHTT_mHTT	12.9675	speed
5	2	siHTT_mHTT	12.7904	speed
6	2	siHTT_mHTT	11.4946	speed
7	2	siHTT_mHTT	11.4024	speed
8	2	siHTT_mHTT	11.0566	speed
10	2	siHTT_mHTT	9.0189	speed
1	3	siHTT_mHTT	11.6274	speed
3	3	siHTT_mHTT	12.3483	speed
4	3	siHTT_mHTT	13.0902	speed
5	3	siHTT_mHTT	12.8269	speed
6	3	siHTT_mHTT	11.2849	speed
7	3	siHTT_mHTT	13.0223	speed
8	3	siHTT_mHTT	10.1266	speed
10	3	siHTT_mHTT	11.8044	speed
1	4	siHTT_mHTT	11.1179	speed
2	4	siHTT_mHTT	12.7894	speed
3	4	siHTT_mHTT	13.4608	speed
4	4	siHTT_mHTT	12.3913	speed
5	4	siHTT_mHTT	13.2623	speed
6	4	siHTT_mHTT	13.4956	speed
7	4	siHTT_mHTT	12.389	speed
8	4	siHTT_mHTT	12.4599	speed
9	4	siHTT_mHTT	12.5042	speed
10	4	siHTT_mHTT	13.4031	speed
1	5	siHTT_mHTT	11.3765	speed
2	5	siHTT_mHTT	11.813	speed
3	5	siHTT_mHTT	12.0146	speed
4	5	siHTT_mHTT	12.9165	speed
5	5	siHTT_mHTT	11.9848	speed
6	5	siHTT_mHTT	12.6152	speed
7	5	siHTT_mHTT	10.6879	speed
8	5	siHTT_mHTT	11.2122	speed
9	5	siHTT_mHTT	10.6103	speed
10	5	siHTT_mHTT	11.5721	speed
1	6	siHTT_mHTT	11.7362	speed
2	6	siHTT_mHTT	12.598	speed
3	6	siHTT_mHTT	13.1219	speed
4	6	siHTT_mHTT	13.6539	speed
5	6	siHTT_mHTT	12.8782	speed
6	6	siHTT_mHTT	13.0176	speed
7	6	siHTT_mHTT	11.3785	speed
8	6	siHTT_mHTT	11.5155	speed
9	6	siHTT_mHTT	11.1271	speed
10	6	siHTT_mHTT	12.0924	speed
1	7	siHTT_mHTT	12.1086	speed
3	7	siHTT_mHTT	12.0175	speed
4	7	siHTT_mHTT	12.9588	speed
5	7	siHTT_mHTT	11.3736	speed
6	7	siHTT_mHTT	10.959	speed
7	7	siHTT_mHTT	10.2637	speed
8	7	siHTT_mHTT	10.0301	speed
9	7	siHTT_mHTT	9.64031	speed
10	7	siHTT_mHTT	10.3136	speed
1	8	siHTT_mHTT	12.646	speed
3	8	siHTT_mHTT	12.5373	speed
4	8	siHTT_mHTT	10.0204	speed
5	8	siHTT_mHTT	11.54	speed
6	8	siHTT_mHTT	12.3352	speed
7	8	siHTT_mHTT	10.7669	speed
8	8	siHTT_mHTT	8.88182	speed
9	8	siHTT_mHTT	10.9916	speed
10	8	siHTT_mHTT	11.3501	speed
1	9	siHTT_mHTT	12.2459	speed
2	9	siHTT_mHTT	12.3805	speed
3	9	siHTT_mHTT	12.261	speed
4	9	siHTT_mHTT	11.9516	speed
5	9	siHTT_mHTT	11.0894	speed
6	9	siHTT_mHTT	11.2352	speed
7	9	siHTT_mHTT	10.0953	speed
8	9	siHTT_mHTT	8.62021	speed
9	9	siHTT_mHTT	9.99235	speed
1	10	siHTT_mHTT	12.2693	speed
2	10	siHTT_mHTT	11.4573	speed
3	10	siHTT_mHTT	12.6423	speed
4	10	siHTT_mHTT	12.3143	speed
5	10	siHTT_mHTT	11.055	speed
6	10	siHTT_mHTT	10.7495	speed
7	10	siHTT_mHTT	10.4356	speed
8	10	siHTT_mHTT	9.93952	speed
9	10	siHTT_mHTT	12.0026	speed
1	11	siHTT_mHTT	12.8241	speed
2	11	siHTT_mHTT	13.0712	speed
3	11	siHTT_mHTT	13.9854	speed
4	11	siHTT_mHTT	12.847	speed
5	11	siHTT_mHTT	12.4258	speed
6	11	siHTT_mHTT	11.2505	speed
7	11	siHTT_mHTT	10.5146	speed
8	11	siHTT_mHTT	11.6061	speed
9	11	siHTT_mHTT	12.4761	speed
1	1	SNAP23_Snap25_NIG_17676R_1_mHTT	12.4642	speed
3	1	SNAP23_Snap25_NIG_17676R_1_mHTT	14.9801	speed
4	1	SNAP23_Snap25_NIG_17676R_1_mHTT	14.2706	speed
5	1	SNAP23_Snap25_NIG_17676R_1_mHTT	12.6847	speed
6	1	SNAP23_Snap25_NIG_17676R_1_mHTT	12.7808	speed
7	1	SNAP23_Snap25_NIG_17676R_1_mHTT	10.592	speed
8	1	SNAP23_Snap25_NIG_17676R_1_mHTT	9.67634	speed
10	1	SNAP23_Snap25_NIG_17676R_1_mHTT	8.65941	speed
1	2	SNAP23_Snap25_NIG_17676R_1_mHTT	13.8942	speed
3	2	SNAP23_Snap25_NIG_17676R_1_mHTT	15.7641	speed
4	2	SNAP23_Snap25_NIG_17676R_1_mHTT	15.0686	speed
5	2	SNAP23_Snap25_NIG_17676R_1_mHTT	13.7461	speed
6	2	SNAP23_Snap25_NIG_17676R_1_mHTT	12.84	speed
7	2	SNAP23_Snap25_NIG_17676R_1_mHTT	12.259	speed
8	2	SNAP23_Snap25_NIG_17676R_1_mHTT	10.581	speed
10	2	SNAP23_Snap25_NIG_17676R_1_mHTT	9.73349	speed
1	3	SNAP23_Snap25_NIG_17676R_1_mHTT	13.3371	speed
3	3	SNAP23_Snap25_NIG_17676R_1_mHTT	15.5613	speed
4	3	SNAP23_Snap25_NIG_17676R_1_mHTT	15.0736	speed
5	3	SNAP23_Snap25_NIG_17676R_1_mHTT	13.5901	speed
6	3	SNAP23_Snap25_NIG_17676R_1_mHTT	12.2128	speed
7	3	SNAP23_Snap25_NIG_17676R_1_mHTT	10.3146	speed
8	3	SNAP23_Snap25_NIG_17676R_1_mHTT	10.156	speed
10	3	SNAP23_Snap25_NIG_17676R_1_mHTT	9.65915	speed
1	4	SNAP23_Snap25_NIG_17676R_1_mHTT	12.9333	speed
3	4	SNAP23_Snap25_NIG_17676R_1_mHTT	13.8766	speed
4	4	SNAP23_Snap25_NIG_17676R_1_mHTT	14.3455	speed
5	4	SNAP23_Snap25_NIG_17676R_1_mHTT	12.9395	speed
6	4	SNAP23_Snap25_NIG_17676R_1_mHTT	11.0106	speed
7	4	SNAP23_Snap25_NIG_17676R_1_mHTT	10.9207	speed
8	4	SNAP23_Snap25_NIG_17676R_1_mHTT	8.45467	speed
10	4	SNAP23_Snap25_NIG_17676R_1_mHTT	7.39083	speed
1	1	SNX9_SH3PX1_NIG_6757R_1_mHTT	11.6014	speed
3	1	SNX9_SH3PX1_NIG_6757R_1_mHTT	13.6712	speed
4	1	SNX9_SH3PX1_NIG_6757R_1_mHTT	13.6676	speed
5	1	SNX9_SH3PX1_NIG_6757R_1_mHTT	13.2933	speed
6	1	SNX9_SH3PX1_NIG_6757R_1_mHTT	13.0939	speed
7	1	SNX9_SH3PX1_NIG_6757R_1_mHTT	12.0295	speed
8	1	SNX9_SH3PX1_NIG_6757R_1_mHTT	11.0215	speed
9	1	SNX9_SH3PX1_NIG_6757R_1_mHTT	10.6798	speed
10	1	SNX9_SH3PX1_NIG_6757R_1_mHTT	8.23636	speed
1	2	SNX9_SH3PX1_NIG_6757R_1_mHTT	10.7066	speed
3	2	SNX9_SH3PX1_NIG_6757R_1_mHTT	12.5955	speed
4	2	SNX9_SH3PX1_NIG_6757R_1_mHTT	12.6818	speed
5	2	SNX9_SH3PX1_NIG_6757R_1_mHTT	12.9214	speed
6	2	SNX9_SH3PX1_NIG_6757R_1_mHTT	12.7369	speed
7	2	SNX9_SH3PX1_NIG_6757R_1_mHTT	10.9849	speed
8	2	SNX9_SH3PX1_NIG_6757R_1_mHTT	10.53	speed
9	2	SNX9_SH3PX1_NIG_6757R_1_mHTT	10.9077	speed
10	2	SNX9_SH3PX1_NIG_6757R_1_mHTT	10.5539	speed
1	3	SNX9_SH3PX1_NIG_6757R_1_mHTT	8.95557	speed
3	3	SNX9_SH3PX1_NIG_6757R_1_mHTT	12.5606	speed
4	3	SNX9_SH3PX1_NIG_6757R_1_mHTT	11.8657	speed
5	3	SNX9_SH3PX1_NIG_6757R_1_mHTT	12.1363	speed
6	3	SNX9_SH3PX1_NIG_6757R_1_mHTT	11.4573	speed
7	3	SNX9_SH3PX1_NIG_6757R_1_mHTT	11.1232	speed
8	3	SNX9_SH3PX1_NIG_6757R_1_mHTT	10.2099	speed
9	3	SNX9_SH3PX1_NIG_6757R_1_mHTT	6.23697	speed
10	3	SNX9_SH3PX1_NIG_6757R_1_mHTT	8.63097	speed
1	4	SNX9_SH3PX1_NIG_6757R_1_mHTT	11.2667	speed
3	4	SNX9_SH3PX1_NIG_6757R_1_mHTT	12.5894	speed
4	4	SNX9_SH3PX1_NIG_6757R_1_mHTT	12.991	speed
5	4	SNX9_SH3PX1_NIG_6757R_1_mHTT	13.1806	speed
6	4	SNX9_SH3PX1_NIG_6757R_1_mHTT	8.91092	speed
7	4	SNX9_SH3PX1_NIG_6757R_1_mHTT	12.4921	speed
8	4	SNX9_SH3PX1_NIG_6757R_1_mHTT	7.08725	speed
9	4	SNX9_SH3PX1_NIG_6757R_1_mHTT	11.051	speed
10	4	SNX9_SH3PX1_NIG_6757R_1_mHTT	11.2964	speed
1	5	SNX9_SH3PX1_NIG_6757R_1_mHTT	11.5904	speed
3	5	SNX9_SH3PX1_NIG_6757R_1_mHTT	13.5313	speed
4	5	SNX9_SH3PX1_NIG_6757R_1_mHTT	14.066	speed
5	5	SNX9_SH3PX1_NIG_6757R_1_mHTT	13.5027	speed
6	5	SNX9_SH3PX1_NIG_6757R_1_mHTT	13.2404	speed
7	5	SNX9_SH3PX1_NIG_6757R_1_mHTT	11.8714	speed
8	5	SNX9_SH3PX1_NIG_6757R_1_mHTT	9.47863	speed
9	5	SNX9_SH3PX1_NIG_6757R_1_mHTT	10.9368	speed
10	5	SNX9_SH3PX1_NIG_6757R_1_mHTT	10.8295	speed
1	6	SNX9_SH3PX1_NIG_6757R_1_mHTT	12.2333	speed
3	6	SNX9_SH3PX1_NIG_6757R_1_mHTT	13.0922	speed
4	6	SNX9_SH3PX1_NIG_6757R_1_mHTT	12.7291	speed
5	6	SNX9_SH3PX1_NIG_6757R_1_mHTT	11.7806	speed
6	6	SNX9_SH3PX1_NIG_6757R_1_mHTT	11.8623	speed
7	6	SNX9_SH3PX1_NIG_6757R_1_mHTT	11.2173	speed
8	6	SNX9_SH3PX1_NIG_6757R_1_mHTT	8.8839	speed
9	6	SNX9_SH3PX1_NIG_6757R_1_mHTT	9.78552	speed
10	6	SNX9_SH3PX1_NIG_6757R_1_mHTT	8.91067	speed
1	1	TIAM1_sif_NIG_5406R_2_mHTT	11.6872	speed
2	1	TIAM1_sif_NIG_5406R_2_mHTT	12.6719	speed
3	1	TIAM1_sif_NIG_5406R_2_mHTT	13.8608	speed
4	1	TIAM1_sif_NIG_5406R_2_mHTT	13.7658	speed
5	1	TIAM1_sif_NIG_5406R_2_mHTT	13.356	speed
6	1	TIAM1_sif_NIG_5406R_2_mHTT	13.4712	speed
7	1	TIAM1_sif_NIG_5406R_2_mHTT	11.659	speed
8	1	TIAM1_sif_NIG_5406R_2_mHTT	12.1588	speed
9	1	TIAM1_sif_NIG_5406R_2_mHTT	11.9437	speed
10	1	TIAM1_sif_NIG_5406R_2_mHTT	13.05	speed
1	2	TIAM1_sif_NIG_5406R_2_mHTT	13.691	speed
2	2	TIAM1_sif_NIG_5406R_2_mHTT	12.3048	speed
3	2	TIAM1_sif_NIG_5406R_2_mHTT	14.0585	speed
4	2	TIAM1_sif_NIG_5406R_2_mHTT	11.4468	speed
5	2	TIAM1_sif_NIG_5406R_2_mHTT	12.5739	speed
6	2	TIAM1_sif_NIG_5406R_2_mHTT	13.1529	speed
7	2	TIAM1_sif_NIG_5406R_2_mHTT	10.1467	speed
8	2	TIAM1_sif_NIG_5406R_2_mHTT	10.8706	speed
9	2	TIAM1_sif_NIG_5406R_2_mHTT	9.99957	speed
10	2	TIAM1_sif_NIG_5406R_2_mHTT	10.1542	speed
1	3	TIAM1_sif_NIG_5406R_2_mHTT	11.7694	speed
2	3	TIAM1_sif_NIG_5406R_2_mHTT	12.4495	speed
3	3	TIAM1_sif_NIG_5406R_2_mHTT	13.5	speed
4	3	TIAM1_sif_NIG_5406R_2_mHTT	14.3573	speed
5	3	TIAM1_sif_NIG_5406R_2_mHTT	13.273	speed
6	3	TIAM1_sif_NIG_5406R_2_mHTT	12.6222	speed
7	3	TIAM1_sif_NIG_5406R_2_mHTT	9.70918	speed
8	3	TIAM1_sif_NIG_5406R_2_mHTT	10.7282	speed
9	3	TIAM1_sif_NIG_5406R_2_mHTT	9.04875	speed
10	3	TIAM1_sif_NIG_5406R_2_mHTT	9.56882	speed
1	4	TIAM1_sif_NIG_5406R_2_mHTT	13.9669	speed
2	4	TIAM1_sif_NIG_5406R_2_mHTT	13.94	speed
3	4	TIAM1_sif_NIG_5406R_2_mHTT	13.7683	speed
4	4	TIAM1_sif_NIG_5406R_2_mHTT	12.9836	speed
5	4	TIAM1_sif_NIG_5406R_2_mHTT	12.8509	speed
6	4	TIAM1_sif_NIG_5406R_2_mHTT	12.733	speed
7	4	TIAM1_sif_NIG_5406R_2_mHTT	10.9719	speed
8	4	TIAM1_sif_NIG_5406R_2_mHTT	10.2658	speed
9	4	TIAM1_sif_NIG_5406R_2_mHTT	9.59075	speed
10	4	TIAM1_sif_NIG_5406R_2_mHTT	9.13788	speed
1	5	TIAM1_sif_NIG_5406R_2_mHTT	13.91	speed
2	5	TIAM1_sif_NIG_5406R_2_mHTT	11.8697	speed
3	5	TIAM1_sif_NIG_5406R_2_mHTT	13.5495	speed
4	5	TIAM1_sif_NIG_5406R_2_mHTT	13.9652	speed
5	5	TIAM1_sif_NIG_5406R_2_mHTT	11.7365	speed
6	5	TIAM1_sif_NIG_5406R_2_mHTT	12.6261	speed
7	5	TIAM1_sif_NIG_5406R_2_mHTT	9.91424	speed
8	5	TIAM1_sif_NIG_5406R_2_mHTT	9.73026	speed
9	5	TIAM1_sif_NIG_5406R_2_mHTT	8.37434	speed
10	5	TIAM1_sif_NIG_5406R_2_mHTT	5.95826	speed
1	1	ZBTB16_zld_BDSC_51350_mHTT	13.096	speed
3	1	ZBTB16_zld_BDSC_51350_mHTT	13.1231	speed
4	1	ZBTB16_zld_BDSC_51350_mHTT	11.9039	speed
5	1	ZBTB16_zld_BDSC_51350_mHTT	12.5924	speed
6	1	ZBTB16_zld_BDSC_51350_mHTT	10.8615	speed
7	1	ZBTB16_zld_BDSC_51350_mHTT	10.3447	speed
8	1	ZBTB16_zld_BDSC_51350_mHTT	8.66216	speed
9	1	ZBTB16_zld_BDSC_51350_mHTT	8.16584	speed
10	1	ZBTB16_zld_BDSC_51350_mHTT	9.07816	speed
1	2	ZBTB16_zld_BDSC_51350_mHTT	11.8885	speed
3	2	ZBTB16_zld_BDSC_51350_mHTT	12.8392	speed
4	2	ZBTB16_zld_BDSC_51350_mHTT	12.3772	speed
5	2	ZBTB16_zld_BDSC_51350_mHTT	11.5206	speed
6	2	ZBTB16_zld_BDSC_51350_mHTT	9.6666	speed
7	2	ZBTB16_zld_BDSC_51350_mHTT	10.1133	speed
8	2	ZBTB16_zld_BDSC_51350_mHTT	8.96	speed
9	2	ZBTB16_zld_BDSC_51350_mHTT	4.68119	speed
10	2	ZBTB16_zld_BDSC_51350_mHTT	5.50426	speed
1	3	ZBTB16_zld_BDSC_51350_mHTT	13.5283	speed
3	3	ZBTB16_zld_BDSC_51350_mHTT	13.9406	speed
4	3	ZBTB16_zld_BDSC_51350_mHTT	14.2739	speed
5	3	ZBTB16_zld_BDSC_51350_mHTT	12.8955	speed
6	3	ZBTB16_zld_BDSC_51350_mHTT	11.3272	speed
7	3	ZBTB16_zld_BDSC_51350_mHTT	10.977	speed
8	3	ZBTB16_zld_BDSC_51350_mHTT	9.39631	speed
9	3	ZBTB16_zld_BDSC_51350_mHTT	8.58522	speed
10	3	ZBTB16_zld_BDSC_51350_mHTT	9.15902	speed
1	4	ZBTB16_zld_BDSC_51350_mHTT	11.6477	speed
3	4	ZBTB16_zld_BDSC_51350_mHTT	12.8929	speed
4	4	ZBTB16_zld_BDSC_51350_mHTT	11.9799	speed
5	4	ZBTB16_zld_BDSC_51350_mHTT	11.3082	speed
6	4	ZBTB16_zld_BDSC_51350_mHTT	10.7624	speed
7	4	ZBTB16_zld_BDSC_51350_mHTT	9.9035	speed
8	4	ZBTB16_zld_BDSC_51350_mHTT	5.96468	speed
9	4	ZBTB16_zld_BDSC_51350_mHTT	6.67839	speed
10	4	ZBTB16_zld_BDSC_51350_mHTT	7.13615	speed
