# Supplementary material for: Downregulation of glial genes involved in synaptic function mitigates Huntington's disease pathogenesis
Source: eLife. 2021 Apr 19;10:e64564. doi: 10.7554/eLife.64564 (PMC8149125; doi:10.7554/eLife.64564)
Supplement: Figure 5—source data 1. [file elife-64564-fig5-data1.xlsx]

## Sheet: Summary
Stock	Repository	Gene	Mutant	Genotype	Average	SE
13974	Vienna Drosophila Resource Center	Non-target	Non-targeting-hpRNA	Scramble hpRNA	0	8.22153
27699	Vienna Drosophila Resource Center	PRKCA	PRCKCA-hpRNA	Knockdown	24.9508	2.13117
9138	Vienna Drosophila Resource Center	GABRG2	GABRG2-hpRNA	Knockdown	26.5336	2.31403
P12-C12	GenetiVision	DNAJB1	DNAJB1-Duplication	Duplication	27.8476	6.11405
P15-E3	GenetiVision	ACADVL	ACADVL-Duplication	Duplication	29.6265	2.86419
102622	Vienna Drosophila Resource Center	SERPINA1	SERPINA1-hpRNA	Knockdown	30.8955	3.91356
51350	Bloomington Drosophila Stock Center	ZBTB16	ZBTB16-Duplicaiton	Duplication	31.7725	5.57159
P6-C6	GenetiVision	MAP4K4	MAP4K4-Duplication	Duplication	31.8174	2.93705
30429	Bloomington Drosophila Stock Center	GTF3A	GTF3A-Duplication	Duplication	36.808	3.53912
977	Vienna Drosophila Resource Center	FLT4	FLT4-Duplication	Knockdown	37.6157	4.3704
30775	Bloomington Drosophila Stock Center	ANXA1	ANXA1-Duplicaiton	Duplication	37.7552	3.22036
30282	Bloomington Drosophila Stock Center	DNAJB1	DNAJB1-Duplication	Duplication	37.8781	2.99291
65295	Bloomington Drosophila Stock Center	HES1	HES1-Duplication	Duplication	39.1023	2.57763
330130	Vienna Drosophila Resource Center	RHOBTB2	RHOBTB2-hpRNA	Knockdown	39.9588	2.49225
35901	Vienna Drosophila Resource Center	NME7	NME7-hpRNA	Knockdown	40.2715	3.30734
46933	Vienna Drosophila Resource Center	DDX17	DDX17-hpRNA	Knockdown	40.6809	8.8006
102057	Vienna Drosophila Resource Center	ADCY5	ADCY5-hpRNA	Knockdown	41.3758	1.41206
6757R-8	National Institute of Genetics, Japan	SNX9	SNX9-hpRNA	Knockdown	43.1154	3.26112
8567	Bloomington Drosophila Stock Center	ABL1	ABL1-Duplication	Duplication	43.5162	3.33228
100636	Vienna Drosophila Resource Center	LMO7	LMO7-hpRNA	Knockdown	45.5173	4.20408
5406R-2	National Institute of Genetics, Japan	TIAM1	TIAM1-hpRNA	Knockdown	49.3904	3.25431
32289	Bloomington Drosophila Stock Center	ATF3	AT3-Duplication	Duplication	50.2855	1.43295
siHTT	Botas Lab	HTT	Mutant HTT-siRNA	Knockdown	51.5032	2.02845
29930	Vienna Drosophila Resource Center	NTRK2	NTRK2-hpRNA	Knockdown	51.8601	5.23726
30231	Bloomington Drosophila Stock Center	RXRA	RXRA-Duplicaiton	Duplication	52.3918	3.78754
17676R-1	National Institute of Genetics, Japan	SNAP23	SNAP23-hpRNA	Knockdown	53.7221	4.03722
11081R-2	National Institute of Genetics, Japan	PLXNA2	PLXNA2-hpRNA	Knockdown	54.1238	1.57661
330714	Vienna Drosophila Resource Center	SEPT7	SEPT7-hpRNA	Knockdown	54.4218	3.37873
66169	Bloomington Drosophila Stock Center	ENAH	EHAH-Overexpression	Overexpression	64.9045	2.28066
19193	Bloomington Drosophila Stock Center	ANXA1	ANXA1-Duplicaiton	Overexpression	65.5105	4.52958
2275R-2	National Institute of Genetics, Japan	JUN	JUN-hpRNA	Knockdown	66.0684	2.03624
9109	Bloomington Drosophila Stock Center	CFL2	CFL2-Classical Mutagenesis	Loss of Function	72.9309	2.6204

## Sheet: Processed Data
Positive Control						19193						30231
	Speed	Normalized to Average	Difference from Normal	Percent			Speed	Normalized	Difference from Normal	Percent			Speed	Normalized	Difference from Normal	Percent
Replicate 1	8.12916	1.0207	0.0207042	2.07042		Replicate 1	12.754	1.6014	0.601403	60.1403		Replicate 1	13.0032	1.63269	0.632688	63.2688
Replicate 2	7.44299	0.934548	-0.0654523	-6.54523		Replicate 2	13.8418	1.73799	0.737991	73.7991		Replicate 2	12.0451	1.51239	0.51239	51.239
Replicate 3	6.5961	0.828211	-0.171789	-17.1789		Replicate 3	13.8418	1.73799	0.737991	73.7991		Replicate 3	11.1446	1.39932	0.399325	39.9325
Replicate 4	9.68883	1.21654	0.216537	21.6537		Replicate 4	14.1368	1.77502	0.775023	77.5023		Replicate 4	12.408	1.55796	0.55796	55.796
						Replicate 5	12.5975	1.58175	0.581754	58.1754		Replicate 5	12.0836	1.51723	0.517226	51.7226
Average of Controls			Average Percent Difference	SE		Replicate 6	11.9183	1.49647	0.496466	49.6466					Average Percent Difference	SE
7.96427			0	8.22153					Average Percent Difference	SE					52.3918	3.78754
									65.5105	4.52958		30281
						2275R-2							Speed	Normalized	Difference from Normal	Percent
11081R-2							Speed	Normalized	Difference from Normal	Percent		Replicate 1	10.4283	1.30938	0.309384	30.9384
	Speed	Normalized	Difference from Normal	Percent		Replicate 1	13.0546	1.63915	0.639148	63.9148		Replicate 2	10.6679	1.33947	0.339475	33.9475
Replicate 1	11.8785	1.49148	0.491479	49.1479		Replicate 2	13.6365	1.71221	0.712207	71.2207		Replicate 3	10.0599	1.26313	0.263128	26.3128
Replicate 2	12.5329	1.57365	0.573646	57.3646		Replicate 3	13.2701	1.6662	0.666199	66.6199		Replicate 4	10.695	1.34288	0.342875	34.2875
Replicate 3	12.277	1.54151	0.54151	54.151		Replicate 4	13.4631	1.69044	0.690438	69.0438		Replicate 5	11.0296	1.38489	0.384887	38.4887
Replicate 4	12.5458	1.57527	0.575266	57.5266		Replicate 5	12.7064	1.59543	0.595428	59.5428		Replicate 6	10.0863	1.26644	0.266439	26.6439
Replicate 5	12.1399	1.52429	0.52429	52.429					Average Percent Difference	SE					Average Percent Difference	SE
			Average Percent Difference	SE					66.0684	2.03624					31.7698	1.94053
			54.1238	1.57661
												30282
17676R-1						29930							Speed	Normalized	Difference from Normal	Percent
	Speed	Normalized	Difference from Normal	Percent			Speed	Normalized	Difference from Normal	Percent		Replicate 1	11.2039	1.40677	0.406766	40.6766
Replicate 1	12.0135	1.50843	0.508427	50.8427		Replicate 1	12.0327	1.51083	0.510833	51.0833		Replicate 2	10.6523	1.33751	0.337513	33.7513
Replicate 2	12.9858	1.63051	0.630508	63.0508		Replicate 2	11.5295	1.44766	0.447657	44.7657		Replicate 3	11.7925	1.48067	0.480673	48.0673
Replicate 3	12.4881	1.56801	0.568013	56.8013		Replicate 3	12.4425	1.56229	0.562289	56.2289		Replicate 4	11.3104	1.42014	0.420138	42.0138
Replicate 4	11.484	1.44194	0.441936	44.1936		Replicate 4	12.3735	1.55362	0.553624	55.3624		Replicate 5	10.8128	1.35767	0.357667	35.7667
			Average Percent Difference						Average Percent Difference	SE		Replicate 6	10.1141	1.26993	0.269932	26.9932
			53.7221	4.03722					51.8601	5.23726					Average Percent Difference	SE
															37.8781	2.99291
						30775						32289
30429							Speed	Normalized	Difference from Normal	Percent			Speed	Normalized	Difference from Normal	Percent
	Speed	Normalized	Difference from Normal	Percent		Replicate 1	9.95112	1.24947	0.249471	24.9471		Replicate 1	12.1825	1.52965	0.529647	52.9647
Replicate 1	10.1327	1.27227	0.272271	27.2271		Replicate 2	11.0634	1.38913	0.389131	38.9131		Replicate 2	11.5817	1.45421	0.454207	45.4207
Replicate 2	11.4613	1.43909	0.439086	43.9086		Replicate 3	11.0399	1.38618	0.386183	38.6183		Replicate 3	12.3549	1.55129	0.551294	55.1294
Replicate 3	10.8684	1.36464	0.364642	36.4642		Replicate 4	11.292	1.41783	0.417828	41.7828		Replicate 4	11.9263	1.49748	0.497478	49.7478
Replicate 4	11.1207	1.39632	0.39632	39.632		Replicate 5	11.82	1.48412	0.484124	48.4124		Replicate 5	12.0075	1.50767	0.507672	50.7672
			Average Percent Difference	SE		Replicate 6	10.6608	1.33858	0.338577	33.8577		Replicate 6	11.7619	1.47683	0.476833	47.6833
			36.808	3.53912					Average Percent Difference	SE					Average Percent Difference	SE
									37.7552	3.22036					50.2855	1.43295
51350						5406R-2						65295
	Speed	Normalized	Difference from Normal	Percent			Speed	Normalized	Difference from Normal	Percent			Speed	Normalized	Difference from Normal	Percent
Replicate 1	10.8697	1.36481	0.364813	36.4813		Replicate 1	12.7624	1.60246	0.602461	60.2461		Replicate 1	11.5689	1.4526	0.452602	45.2602
Replicate 2	9.72788	1.22144	0.22144	22.144		Replicate 2	11.8399	1.48663	0.486626	48.6626		Replicate 2	11.4279	1.43489	0.434894	43.4894
Replicate 3	11.5731	1.45312	0.453123	45.3123		Replicate 3	11.7026	1.46939	0.469392	46.9392		Replicate 3	10.9761	1.37816	0.378164	37.8164
Replicate 4	9.8082	1.23153	0.231525	23.1525		Replicate 4	12.0209	1.50936	0.509355	50.9355		Replicate 4	11.0243	1.38423	0.384226	38.4226
			Average Percent Difference	SE		Replicate 5	11.1634	1.40169	0.401687	40.1687		Replicate 5	10.3952	1.30523	0.305231	30.5231
			31.7725	5.57159					Average Percent Difference	SE					Average Percent Difference	SE
									49.3904	3.25431					39.1023	2.57763
66169						6757R-8						8567
	Speed	Normalized	Difference from Normal	Percent			Speed	Normalized	Difference from Normal	Percent			Speed	Normalized	Difference from Normal	Percent
Replicate 1	12.5703	1.57834	0.578341	57.8341		Replicate 1	11.9216	1.49689	0.496887	49.6887		Replicate 1	11.905	1.4948	0.494805	49.4805
Replicate 2	13.8842	1.74331	0.743314	74.3314		Replicate 2	11.6243	1.45956	0.459555	45.9555		Replicate 2	11.6534	1.46321	0.463214	46.3214
Replicate 3	13.2487	1.66352	0.663521	66.3521		Replicate 3	10.3529	1.29992	0.299924	29.9924		Replicate 3	12.3501	1.55069	0.550692	55.0692
Replicate 4	12.8617	1.61492	0.614919	61.4919		Replicate 4	11.2073	1.40719	0.407192	40.7192		Replicate 4	10.9108	1.36997	0.369969	36.9969
Replicate 5	13.0145	1.63411	0.634112	63.4112		Replicate 5	12.1164	1.52134	0.521338	52.1338		Replicate 5	10.6385	1.33578	0.335778	33.5778
Replicate 6	13.2212	1.66007	0.660065	66.0065		Replicate 6	11.1661	1.40203	0.402026	40.2026		Replicate 6	11.1222	1.39651	0.396514	39.6514
			Average Percent Difference	SE					Average Percent Difference	SE					Average Percent Difference	SE
			64.9045	2.28066					43.1154	3.26112					43.5162	3.33228
9109						P10-C8						P11-A12
	Speed	Normalized	Difference from Normal	Percent			Speed	Normalized	Difference from Normal	Percent			Speed	Normalized	Difference from Normal	Percent
Replicate 1	13.1197	1.64732	0.647324	64.7324		Replicate 1	11.6253	1.45968	0.459677	45.9677		Replicate 1	11.6447	1.46211	0.462113	46.2113
Replicate 2	14.4336	1.81229	0.812289	81.2289		Replicate 2	9.29299	1.16683	0.166835	16.6835		Replicate 2	12.7888	1.60578	0.605776	60.5776
Replicate 3	14.0165	1.75993	0.759928	75.9928		Replicate 3	9.91176	1.24453	0.244528	24.4528		Replicate 3	10.684	1.3415	0.341496	34.1496
Replicate 4	14.1799	1.78044	0.780443	78.0443		Replicate 4	11.0291	1.38483	0.384826	38.4826		Replicate 4	12.0294	1.51042	0.510425	51.0425
Replicate 5	13.466	1.69081	0.690807	69.0807								Replicate 5	12.5707	1.57838	0.578381	57.8381
Replicate 6	13.4203	1.68506	0.685062	68.5062								Replicate 6	12.8698	1.61594	0.615945	61.5945
			Average Percent Difference	SE					Average Percent Difference	SE					Average Percent Difference	SE
			72.9309	2.6204					31.3967	6.62835					51.9023	4.29231
												P13-F11
	Speed	Normalized	Difference from Normal	Percent			Speed	Normalized	Difference from Normal	Percent			Speed	Normalized	Difference from Normal	Percent
Replicate 1	11.1632	1.40166	0.401661	40.1661		Replicate 1	11.012	1.38268	0.382681	38.2681		Replicate 1	10.5381	1.32317	0.323169	32.3169
Replicate 2	10.6892	1.34214	0.342139	34.2139		Replicate 2	11.0363	1.38573	0.385731	38.5731		Replicate 2	10.2888	1.29187	0.291872	29.1872
Replicate 3	11.5788	1.45385	0.453847	45.3847		Replicate 3	9.27396	1.16445	0.164446	16.4446		Replicate 3	10.7875	1.35449	0.354492	35.4492
Replicate 4	11.0624	1.389	0.389	38.9		Replicate 4	9.40616	1.18104	0.181045	18.1045		Replicate 4	12.2163	1.53388	0.533883	53.3883
Replicate 5	11.5462	1.44975	0.449746	44.9746								Replicate 5	10.6742	1.34026	0.34026	34.026
Replicate 6	11.0774	1.39088	0.390882	39.0882
			Average Percent Difference	SE					Average Percent Difference	SE					Average Percent Difference	SE
			40.4546	1.71318					27.8476	6.11405					36.8735	4.25861
P15-E3						P6-C6						siHTT
	Speed	Normalized	Difference from Normal	Percent			Speed	Normalized	Difference from Normal	Percent			Speed	Normalized	Difference from Normal	Percent
Replicate 1	10.8923	1.36764	0.367644	36.7644		Replicate 1	10.9	1.36861	0.368612	36.8612		Replicate 1	11.9373	1.49885	0.498853	49.8853
Replicate 2	10.7822	1.35382	0.353818	35.3818		Replicate 2	10.8642	1.36412	0.364121	36.4121		Replicate 2	11.7235	1.47202	0.472015	47.2015
Replicate 3	10.2825	1.29108	0.291078	29.1078		Replicate 3	10.7872	1.35445	0.354447	35.4447		Replicate 3	12.0164	1.50878	0.508785	50.8785
Replicate 4	9.9312	1.24697	0.246969	24.6969		Replicate 4	10.2506	1.28708	0.287076	28.7076		Replicate 4	12.7274	1.59806	0.598056	59.8056
Replicate 5	9.73086	1.22181	0.221814	22.1814		Replicate 5	9.68943	1.21661	0.216613	21.6613		Replicate 5	11.6803	1.46659	0.466587	46.6587
												Replicate 6	12.3119	1.5459	0.545896	54.5896
			Average Percent Difference	SE					Average Percent Difference	SE					Average	SE
			29.6265	2.86419					31.8174	2.93705					51.5032	2.02845
v100636						v102057						v102622
	Speed	Normalized	Difference from Normal	Percent			Speed	Normalized	Difference from Normal	Percent			Speed	Normalized	Difference from Normal	Percent
Replicate 1	12.8332	1.61135	0.611346	61.1346		Replicate 1	11.5899	1.45523	0.455231	45.5231		Replicate 1	9.44499	1.18592	0.18592	18.592
Replicate 2	11.3649	1.42699	0.426991	42.6991		Replicate 2	11.4379	1.43615	0.436146	43.6146		Replicate 2	10.3168	1.29539	0.295385	29.5385
Replicate 3	10.7018	1.34372	0.343724	34.3724		Replicate 3	11.1925	1.40534	0.405345	40.5345		Replicate 3	10.6172	1.3331	0.333103	33.3103
Replicate 4	11.728	1.47257	0.472571	47.2571		Replicate 4	11.1169	1.39585	0.395847	39.5847		Replicate 4	11.3889	1.43	0.430005	43.0005
Replicate 5	12.1333	1.52346	0.523464	52.3464		Replicate 5	11.4008	1.43149	0.43149	43.149		Replicate 5	10.3564	1.30036	0.300361	30.0361
Replicate 6	10.7752	1.35294	0.35294	35.294		Replicate 6	10.8194	1.35849	0.358491	35.8491
			Average Percent Difference	SE					Average Percent Difference	SE					Average	SE
			45.5173	4.20408					41.3758	1.41206					30.8955	3.91356
v27699						v330130						v330714
	Speed	Normalized	Difference from Normal	Percent			Speed	Normalized	Difference from Normal	Percent			Speed	Normalized	Difference from Normal	Percent
Replicate 1	10.2385	1.28556	0.285556	28.5556		Replicate 1	10.9407	1.37373	0.373728	37.3728		Replicate 1	11.8135	1.48331	0.483309	48.3309
Replicate 2	9.65653	1.21248	0.212482	21.2482		Replicate 2	11.6584	1.46384	0.463842	46.3842		Replicate 2	12.9543	1.62656	0.626556	62.6556
Replicate 3	9.94396	1.24857	0.248572	24.8572		Replicate 3	10.6295	1.33464	0.334644	33.4644		Replicate 3	11.5259	1.4472	0.447202	44.7202
Replicate 4	10.41	1.30708	0.307082	30.7082		Replicate 4	11.5637	1.45195	0.451946	45.1946		Replicate 4	12.5513	1.57595	0.575946	57.5946
Replicate 5	9.50815	1.19385	0.19385	19.385		Replicate 5	10.9412	1.37378	0.37378	37.378		Replicate 5	12.6479	1.58807	0.588074	58.8074
			Average Percent Difference	SE					Average Percent Difference	SE					Average	SE
			24.9508	2.13117					39.9588	2.49225					54.4218	3.37873
v35901						v46933						v9138
	Speed	Normalized	Difference from Normal	Percent			Speed	Normalized	Difference from Normal	Percent			Speed	Normalized	Difference from Normal	Percent
Replicate 1	11.2856	1.41702	0.417024	41.7024		Replicate 1	10.4891	1.31702	0.317024	31.7024		Replicate 1	10.4405	1.31092	0.310922	31.0922
Replicate 2	11.162	1.40151	0.401507	40.1507		Replicate 2	11.5036	1.4444	0.444398	44.4398		Replicate 2	10.3509	1.29967	0.29967	29.967
Replicate 3	12.2577	1.53909	0.53909	53.909		Replicate 3	12.0391	1.51164	0.511643	51.1643		Replicate 3	10.0077	1.25658	0.256578	25.6578
Replicate 4	10.9307	1.37246	0.372465	37.2465		Replicate 4	10.785	1.35417	0.354172	35.4172		Replicate 4	10.186	1.27897	0.278966	27.8966
Replicate 5	10.261	1.28838	0.288381	28.8381								Replicate 5	9.40215	1.18054	0.180541	18.0541
Replicate 6	11.1326	1.39782	0.397821	39.7821					Average Percent Difference	SE					Average	SE
			Average Percent Difference	SE					40.6809	8.8006					26.5336	2.31403
			40.2715	3.30734
v977
	Speed	Normalized	Difference from Normal	Percent
Replicate 1	11.268	1.41481	0.414813	41.4813
Replicate 2	10.5604	1.32597	0.325973	32.5973
Replicate 3	10.0193	1.25803	0.258028	25.8028
Replicate 4	11.0156	1.38312	0.383125	38.3125
Replicate 5	12.4523	1.56351	0.563515	56.3515
Replicate 6	10.445	1.31148	0.311485	31.1485
			Average Percent Difference	SE
			37.6157	4.3704

## Sheet: Raw Data
Trialday	Replicate	Genotype	Observation	Metric
1	1	11081R_2_elav_repo_NT	14.0343	speed
3	1	11081R_2_elav_repo_NT	15.2284	speed
4	1	11081R_2_elav_repo_NT	16.3381	speed
5	1	11081R_2_elav_repo_NT	13.4539	speed
6	1	11081R_2_elav_repo_NT	13.1336	speed
7	1	11081R_2_elav_repo_NT	11.9012	speed
8	1	11081R_2_elav_repo_NT	8.46208	speed
10	1	11081R_2_elav_repo_NT	8.43901	speed
1	2	11081R_2_elav_repo_NT	14.262	speed
3	2	11081R_2_elav_repo_NT	15.0062	speed
4	2	11081R_2_elav_repo_NT	15.749	speed
5	2	11081R_2_elav_repo_NT	13.9462	speed
6	2	11081R_2_elav_repo_NT	12.4106	speed
7	2	11081R_2_elav_repo_NT	12.7959	speed
8	2	11081R_2_elav_repo_NT	11.1331	speed
10	2	11081R_2_elav_repo_NT	10.4264	speed
1	3	11081R_2_elav_repo_NT	13.4298	speed
3	3	11081R_2_elav_repo_NT	14.5464	speed
4	3	11081R_2_elav_repo_NT	14.6718	speed
5	3	11081R_2_elav_repo_NT	14.4188	speed
6	3	11081R_2_elav_repo_NT	13.8435	speed
7	3	11081R_2_elav_repo_NT	12.7469	speed
8	3	11081R_2_elav_repo_NT	10.5261	speed
10	3	11081R_2_elav_repo_NT	8.51573	speed
1	4	11081R_2_elav_repo_NT	13.5553	speed
3	4	11081R_2_elav_repo_NT	14.5245	speed
4	4	11081R_2_elav_repo_NT	16.2277	speed
5	4	11081R_2_elav_repo_NT	13.3195	speed
6	4	11081R_2_elav_repo_NT	12.5451	speed
7	4	11081R_2_elav_repo_NT	12.5307	speed
8	4	11081R_2_elav_repo_NT	11.3967	speed
10	4	11081R_2_elav_repo_NT	9.22432	speed
1	5	11081R_2_elav_repo_NT	13.0908	speed
3	5	11081R_2_elav_repo_NT	14.148	speed
4	5	11081R_2_elav_repo_NT	14.1545	speed
5	5	11081R_2_elav_repo_NT	13.1774	speed
6	5	11081R_2_elav_repo_NT	13.002	speed
7	5	11081R_2_elav_repo_NT	12.7557	speed
8	5	11081R_2_elav_repo_NT	7.9107	speed
10	5	11081R_2_elav_repo_NT	10.5527	speed
1	6	17676R_1_elav_repo_NT	12.4642	speed
3	6	17676R_1_elav_repo_NT	14.9801	speed
4	6	17676R_1_elav_repo_NT	14.2706	speed
5	6	17676R_1_elav_repo_NT	12.6847	speed
6	6	17676R_1_elav_repo_NT	12.7808	speed
7	6	17676R_1_elav_repo_NT	10.592	speed
8	6	17676R_1_elav_repo_NT	9.67634	speed
10	6	17676R_1_elav_repo_NT	8.65941	speed
1	7	17676R_1_elav_repo_NT	13.8942	speed
3	7	17676R_1_elav_repo_NT	15.7641	speed
4	7	17676R_1_elav_repo_NT	15.0686	speed
5	7	17676R_1_elav_repo_NT	13.7461	speed
6	7	17676R_1_elav_repo_NT	12.84	speed
7	7	17676R_1_elav_repo_NT	12.259	speed
8	7	17676R_1_elav_repo_NT	10.581	speed
10	7	17676R_1_elav_repo_NT	9.73349	speed
1	8	17676R_1_elav_repo_NT	13.3371	speed
3	8	17676R_1_elav_repo_NT	15.5613	speed
4	8	17676R_1_elav_repo_NT	15.0736	speed
5	8	17676R_1_elav_repo_NT	13.5901	speed
6	8	17676R_1_elav_repo_NT	12.2128	speed
7	8	17676R_1_elav_repo_NT	10.3146	speed
8	8	17676R_1_elav_repo_NT	10.156	speed
10	8	17676R_1_elav_repo_NT	9.65915	speed
1	9	17676R_1_elav_repo_NT	12.9333	speed
3	9	17676R_1_elav_repo_NT	13.8766	speed
4	9	17676R_1_elav_repo_NT	14.3455	speed
5	9	17676R_1_elav_repo_NT	12.9395	speed
6	9	17676R_1_elav_repo_NT	11.0106	speed
7	9	17676R_1_elav_repo_NT	10.9207	speed
8	9	17676R_1_elav_repo_NT	8.45467	speed
10	9	17676R_1_elav_repo_NT	7.39083	speed
1	1	19193_elav_repo_NT	14.1855	speed
1	2	19193_elav_repo_NT	13.1621	speed
1	3	19193_elav_repo_NT	12.4654	speed
1	4	19193_elav_repo_NT	13.1693	speed
1	5	19193_elav_repo_NT	12.6437	speed
1	6	19193_elav_repo_NT	13.2136	speed
1	7	19193_elav_repo_NT	13.0272	speed
1	8	19193_elav_repo_NT	13.2355	speed
1	9	19193_elav_repo_NT	11.8764	speed
1	10	19193_elav_repo_NT	10.5614	speed
3	1	19193_elav_repo_NT	14.7657	speed
3	2	19193_elav_repo_NT	13.3454	speed
3	3	19193_elav_repo_NT	14.002	speed
3	4	19193_elav_repo_NT	13.9605	speed
3	5	19193_elav_repo_NT	13.7002	speed
3	6	19193_elav_repo_NT	13.915	speed
3	7	19193_elav_repo_NT	13.2015	speed
3	8	19193_elav_repo_NT	14.4016	speed
3	9	19193_elav_repo_NT	14.0964	speed
3	10	19193_elav_repo_NT	13.0301	speed
4	1	19193_elav_repo_NT	14.7991	speed
4	2	19193_elav_repo_NT	13.7567	speed
4	3	19193_elav_repo_NT	15.2883	speed
4	4	19193_elav_repo_NT	13.8018	speed
4	5	19193_elav_repo_NT	13.1029	speed
4	6	19193_elav_repo_NT	14.7572	speed
4	7	19193_elav_repo_NT	13.6605	speed
4	8	19193_elav_repo_NT	14.5127	speed
4	9	19193_elav_repo_NT	14.1544	speed
4	10	19193_elav_repo_NT	13.534	speed
5	1	19193_elav_repo_NT	13.794	speed
5	2	19193_elav_repo_NT	12.5334	speed
5	3	19193_elav_repo_NT	13.4349	speed
5	4	19193_elav_repo_NT	13.0408	speed
5	5	19193_elav_repo_NT	10.8276	speed
5	6	19193_elav_repo_NT	12.4374	speed
5	7	19193_elav_repo_NT	13.3402	speed
5	8	19193_elav_repo_NT	12.6977	speed
5	9	19193_elav_repo_NT	11.5952	speed
5	10	19193_elav_repo_NT	12.2741	speed
6	1	19193_elav_repo_NT	13.2025	speed
6	2	19193_elav_repo_NT	12.2419	speed
6	3	19193_elav_repo_NT	12.8225	speed
6	4	19193_elav_repo_NT	11.7485	speed
6	5	19193_elav_repo_NT	11.4743	speed
6	6	19193_elav_repo_NT	12.8497	speed
6	7	19193_elav_repo_NT	11.4849	speed
6	8	19193_elav_repo_NT	11.7122	speed
6	9	19193_elav_repo_NT	11.4241	speed
6	10	19193_elav_repo_NT	10.2218	speed
7	1	19193_elav_repo_NT	13.1406	speed
7	2	19193_elav_repo_NT	10.8501	speed
7	3	19193_elav_repo_NT	13.149	speed
7	4	19193_elav_repo_NT	10.9926	speed
7	5	19193_elav_repo_NT	9.79403	speed
7	6	19193_elav_repo_NT	12.1828	speed
7	7	19193_elav_repo_NT	13.2098	speed
7	8	19193_elav_repo_NT	10.2781	speed
7	9	19193_elav_repo_NT	9.87572	speed
7	10	19193_elav_repo_NT	10.0344	speed
8	1	19193_elav_repo_NT	10.036	speed
8	2	19193_elav_repo_NT	9.02665	speed
8	3	19193_elav_repo_NT	11.7018	speed
8	4	19193_elav_repo_NT	10.0062	speed
8	5	19193_elav_repo_NT	9.50424	speed
8	6	19193_elav_repo_NT	11.1875	speed
8	7	19193_elav_repo_NT	10.5978	speed
8	8	19193_elav_repo_NT	8.5893	speed
8	9	19193_elav_repo_NT	8.12679	speed
8	10	19193_elav_repo_NT	8.64477	speed
10	1	19193_elav_repo_NT	10.6637	speed
10	2	19193_elav_repo_NT	7.57692	speed
10	3	19193_elav_repo_NT	11.2431	speed
10	4	19193_elav_repo_NT	7.85242	speed
10	5	19193_elav_repo_NT	6.93565	speed
10	6	19193_elav_repo_NT	9.31516	speed
10	7	19193_elav_repo_NT	10.5631	speed
10	8	19193_elav_repo_NT	7.27921	speed
10	9	19193_elav_repo_NT	6.11	speed
10	10	19193_elav_repo_NT	8.28843	speed
1	1	2275R_2_elav_repo_NT	13.0142	speed
2	1	2275R_2_elav_repo_NT	12.7766	speed
3	1	2275R_2_elav_repo_NT	14.1797	speed
4	1	2275R_2_elav_repo_NT	14.5118	speed
5	1	2275R_2_elav_repo_NT	14.3304	speed
6	1	2275R_2_elav_repo_NT	14.0833	speed
7	1	2275R_2_elav_repo_NT	13.2972	speed
8	1	2275R_2_elav_repo_NT	10.8513	speed
9	1	2275R_2_elav_repo_NT	11.9431	speed
10	1	2275R_2_elav_repo_NT	11.5586	speed
1	2	2275R_2_elav_repo_NT	13.1917	speed
2	2	2275R_2_elav_repo_NT	13.4285	speed
3	2	2275R_2_elav_repo_NT	13.8856	speed
4	2	2275R_2_elav_repo_NT	14.9538	speed
5	2	2275R_2_elav_repo_NT	14.4127	speed
6	2	2275R_2_elav_repo_NT	14.3066	speed
7	2	2275R_2_elav_repo_NT	13.9016	speed
8	2	2275R_2_elav_repo_NT	12.7924	speed
9	2	2275R_2_elav_repo_NT	12.841	speed
10	2	2275R_2_elav_repo_NT	12.6508	speed
1	3	2275R_2_elav_repo_NT	12.973	speed
2	3	2275R_2_elav_repo_NT	12.9772	speed
3	3	2275R_2_elav_repo_NT	14.5188	speed
4	3	2275R_2_elav_repo_NT	13.9246	speed
5	3	2275R_2_elav_repo_NT	12.9628	speed
6	3	2275R_2_elav_repo_NT	13.8777	speed
7	3	2275R_2_elav_repo_NT	13.3247	speed
8	3	2275R_2_elav_repo_NT	12.8485	speed
9	3	2275R_2_elav_repo_NT	12.2183	speed
10	3	2275R_2_elav_repo_NT	13.0751	speed
1	4	2275R_2_elav_repo_NT	13.2285	speed
2	4	2275R_2_elav_repo_NT	12.5169	speed
3	4	2275R_2_elav_repo_NT	13.8348	speed
4	4	2275R_2_elav_repo_NT	15.0938	speed
5	4	2275R_2_elav_repo_NT	13.9291	speed
6	4	2275R_2_elav_repo_NT	14.5506	speed
7	4	2275R_2_elav_repo_NT	12.9386	speed
8	4	2275R_2_elav_repo_NT	12.8274	speed
9	4	2275R_2_elav_repo_NT	13.0528	speed
10	4	2275R_2_elav_repo_NT	12.6585	speed
1	5	2275R_2_elav_repo_NT	8.295	speed
2	5	2275R_2_elav_repo_NT	12.4897	speed
3	5	2275R_2_elav_repo_NT	13.6867	speed
4	5	2275R_2_elav_repo_NT	15.4849	speed
5	5	2275R_2_elav_repo_NT	13.8571	speed
6	5	2275R_2_elav_repo_NT	13.8034	speed
7	5	2275R_2_elav_repo_NT	14.5247	speed
8	5	2275R_2_elav_repo_NT	11.9298	speed
9	5	2275R_2_elav_repo_NT	11.8863	speed
10	5	2275R_2_elav_repo_NT	11.1067	speed
1	1	29930_elav_repo_NT	12.8746	speed
3	1	29930_elav_repo_NT	13.4772	speed
4	1	29930_elav_repo_NT	14.6785	speed
5	1	29930_elav_repo_NT	13.855	speed
6	1	29930_elav_repo_NT	11.4283	speed
7	1	29930_elav_repo_NT	12.4187	speed
8	1	29930_elav_repo_NT	7.90454	speed
10	1	29930_elav_repo_NT	9.62456	speed
1	2	29930_elav_repo_NT	12.1128	speed
3	2	29930_elav_repo_NT	13.591	speed
4	2	29930_elav_repo_NT	13.5206	speed
5	2	29930_elav_repo_NT	11.9163	speed
6	2	29930_elav_repo_NT	11.6443	speed
7	2	29930_elav_repo_NT	11.2806	speed
8	2	29930_elav_repo_NT	9.51016	speed
10	2	29930_elav_repo_NT	8.66047	speed
1	3	29930_elav_repo_NT	13.2232	speed
2	3	29930_elav_repo_NT	14.376	speed
3	3	29930_elav_repo_NT	13.6554	speed
4	3	29930_elav_repo_NT	13.5115	speed
5	3	29930_elav_repo_NT	13.3977	speed
6	3	29930_elav_repo_NT	12.5545	speed
7	3	29930_elav_repo_NT	11.0155	speed
8	3	29930_elav_repo_NT	10.6043	speed
9	3	29930_elav_repo_NT	9.64427	speed
1	4	29930_elav_repo_NT	13.4842	speed
2	4	29930_elav_repo_NT	14.2054	speed
3	4	29930_elav_repo_NT	14.4976	speed
4	4	29930_elav_repo_NT	13.6038	speed
5	4	29930_elav_repo_NT	12.4919	speed
6	4	29930_elav_repo_NT	11.9006	speed
7	4	29930_elav_repo_NT	11.1757	speed
8	4	29930_elav_repo_NT	10.4579	speed
9	4	29930_elav_repo_NT	9.54444	speed
1	1	30230_elav_repo_NT	13.3171	speed
3	1	30230_elav_repo_NT	13.2233	speed
4	1	30230_elav_repo_NT	13.1544	speed
5	1	30230_elav_repo_NT	11.9353	speed
6	1	30230_elav_repo_NT	10.9777	speed
7	1	30230_elav_repo_NT	9.94691	speed
8	1	30230_elav_repo_NT	9.30559	speed
10	1	30230_elav_repo_NT	8.68318	speed
1	1	30231_elav_repo_NT	14.2593	speed
3	1	30231_elav_repo_NT	13.9434	speed
4	1	30231_elav_repo_NT	14.6461	speed
5	1	30231_elav_repo_NT	13.2968	speed
6	1	30231_elav_repo_NT	13.3391	speed
7	1	30231_elav_repo_NT	12.993	speed
8	1	30231_elav_repo_NT	10.9863	speed
10	1	30231_elav_repo_NT	10.5613	speed
1	2	30231_elav_repo_NT	13.0003	speed
3	2	30231_elav_repo_NT	14.2241	speed
4	2	30231_elav_repo_NT	13.7689	speed
5	2	30231_elav_repo_NT	12.9033	speed
6	2	30231_elav_repo_NT	12.3102	speed
7	2	30231_elav_repo_NT	11.5607	speed
8	2	30231_elav_repo_NT	9.82062	speed
10	2	30231_elav_repo_NT	8.77253	speed
1	3	30231_elav_repo_NT	13.1672	speed
3	3	30231_elav_repo_NT	13.1892	speed
4	3	30231_elav_repo_NT	13.4643	speed
5	3	30231_elav_repo_NT	11.9145	speed
6	3	30231_elav_repo_NT	11.8546	speed
7	3	30231_elav_repo_NT	6.85177	speed
8	3	30231_elav_repo_NT	9.56454	speed
10	3	30231_elav_repo_NT	9.15067	speed
1	4	30231_elav_repo_NT	13.6203	speed
3	4	30231_elav_repo_NT	14.7104	speed
4	4	30231_elav_repo_NT	15.1728	speed
5	4	30231_elav_repo_NT	13.4134	speed
6	4	30231_elav_repo_NT	12.396	speed
7	4	30231_elav_repo_NT	11.4883	speed
8	4	30231_elav_repo_NT	9.69736	speed
10	4	30231_elav_repo_NT	8.7656	speed
1	5	30231_elav_repo_NT	13.0403	speed
3	5	30231_elav_repo_NT	14.0904	speed
4	5	30231_elav_repo_NT	15.1121	speed
5	5	30231_elav_repo_NT	12.5808	speed
6	5	30231_elav_repo_NT	12.1799	speed
7	5	30231_elav_repo_NT	10.9564	speed
8	5	30231_elav_repo_NT	10.0017	speed
10	5	30231_elav_repo_NT	8.70718	speed
1	1	30281_elav_repo_NT	13.5674	speed
3	1	30281_elav_repo_NT	13.3077	speed
4	1	30281_elav_repo_NT	12.7642	speed
5	1	30281_elav_repo_NT	11.7803	speed
6	1	30281_elav_repo_NT	10.941	speed
7	1	30281_elav_repo_NT	9.96195	speed
8	1	30281_elav_repo_NT	6.20078	speed
9	1	30281_elav_repo_NT	7.356	speed
10	1	30281_elav_repo_NT	7.97531	speed
1	2	30281_elav_repo_NT	13.5281	speed
3	2	30281_elav_repo_NT	14.2053	speed
4	2	30281_elav_repo_NT	13.3462	speed
5	2	30281_elav_repo_NT	12.1586	speed
6	2	30281_elav_repo_NT	11.3471	speed
7	2	30281_elav_repo_NT	8.7909	speed
8	2	30281_elav_repo_NT	7.63716	speed
9	2	30281_elav_repo_NT	7.525	speed
10	2	30281_elav_repo_NT	7.47303	speed
1	3	30281_elav_repo_NT	13.5263	speed
3	3	30281_elav_repo_NT	13.0225	speed
4	3	30281_elav_repo_NT	11.8092	speed
5	3	30281_elav_repo_NT	11.0655	speed
6	3	30281_elav_repo_NT	10.3218	speed
7	3	30281_elav_repo_NT	9.03844	speed
8	3	30281_elav_repo_NT	7.42954	speed
9	3	30281_elav_repo_NT	7.1322	speed
10	3	30281_elav_repo_NT	7.19347	speed
1	4	30281_elav_repo_NT	12.9936	speed
3	4	30281_elav_repo_NT	14.2079	speed
4	4	30281_elav_repo_NT	13.4587	speed
5	4	30281_elav_repo_NT	12.0777	speed
6	4	30281_elav_repo_NT	10.507	speed
7	4	30281_elav_repo_NT	10.0362	speed
8	4	30281_elav_repo_NT	9.3954	speed
9	4	30281_elav_repo_NT	5.96643	speed
10	4	30281_elav_repo_NT	7.61229	speed
1	5	30281_elav_repo_NT	13.5587	speed
3	5	30281_elav_repo_NT	14.5149	speed
4	5	30281_elav_repo_NT	13.9716	speed
5	5	30281_elav_repo_NT	12.7049	speed
6	5	30281_elav_repo_NT	10.5286	speed
7	5	30281_elav_repo_NT	10.1078	speed
8	5	30281_elav_repo_NT	8.71593	speed
9	5	30281_elav_repo_NT	7.76875	speed
10	5	30281_elav_repo_NT	7.39537	speed
1	6	30281_elav_repo_NT	12.1626	speed
3	6	30281_elav_repo_NT	13.0167	speed
4	6	30281_elav_repo_NT	12.6202	speed
5	6	30281_elav_repo_NT	11.7718	speed
6	6	30281_elav_repo_NT	9.90508	speed
7	6	30281_elav_repo_NT	8.82926	speed
8	6	30281_elav_repo_NT	7.60015	speed
9	6	30281_elav_repo_NT	7.17735	speed
10	6	30281_elav_repo_NT	7.69323	speed
1	1	30282_elav_repo_NT	12.5054	speed
3	1	30282_elav_repo_NT	13.8122	speed
4	1	30282_elav_repo_NT	13.9594	speed
5	1	30282_elav_repo_NT	12.0164	speed
6	1	30282_elav_repo_NT	11.2113	speed
7	1	30282_elav_repo_NT	10.3575	speed
8	1	30282_elav_repo_NT	8.89005	speed
10	1	30282_elav_repo_NT	6.87868	speed
1	2	30282_elav_repo_NT	12.7185	speed
3	2	30282_elav_repo_NT	13.7382	speed
4	2	30282_elav_repo_NT	12.6694	speed
5	2	30282_elav_repo_NT	11.094	speed
6	2	30282_elav_repo_NT	9.891	speed
7	2	30282_elav_repo_NT	9.54015	speed
8	2	30282_elav_repo_NT	8.2733	speed
10	2	30282_elav_repo_NT	7.29405	speed
1	3	30282_elav_repo_NT	13.3061	speed
3	3	30282_elav_repo_NT	14.3758	speed
4	3	30282_elav_repo_NT	13.8057	speed
5	3	30282_elav_repo_NT	12.2523	speed
6	3	30282_elav_repo_NT	11.4158	speed
7	3	30282_elav_repo_NT	11.2252	speed
8	3	30282_elav_repo_NT	9.19741	speed
10	3	30282_elav_repo_NT	8.76148	speed
1	4	30282_elav_repo_NT	13.0666	speed
3	4	30282_elav_repo_NT	13.8845	speed
4	4	30282_elav_repo_NT	13.7326	speed
5	4	30282_elav_repo_NT	10.7266	speed
6	4	30282_elav_repo_NT	10.7768	speed
7	4	30282_elav_repo_NT	11.0421	speed
8	4	30282_elav_repo_NT	8.90741	speed
10	4	30282_elav_repo_NT	8.34631	speed
1	5	30282_elav_repo_NT	12.7424	speed
3	5	30282_elav_repo_NT	13.5995	speed
4	5	30282_elav_repo_NT	14.1849	speed
5	5	30282_elav_repo_NT	11.1101	speed
6	5	30282_elav_repo_NT	10.1195	speed
7	5	30282_elav_repo_NT	9.16326	speed
8	5	30282_elav_repo_NT	7.88663	speed
10	5	30282_elav_repo_NT	7.6962	speed
1	6	30282_elav_repo_NT	10.7438	speed
3	6	30282_elav_repo_NT	13.4303	speed
4	6	30282_elav_repo_NT	13.4407	speed
5	6	30282_elav_repo_NT	11.3933	speed
6	6	30282_elav_repo_NT	9.8182	speed
7	6	30282_elav_repo_NT	7.8817	speed
8	6	30282_elav_repo_NT	7.11965	speed
10	6	30282_elav_repo_NT	7.08503	speed
1	1	30429_elav_repo_NT	11.8507	speed
2	1	30429_elav_repo_NT	12.121	speed
3	1	30429_elav_repo_NT	12.6423	speed
4	1	30429_elav_repo_NT	12.0764	speed
5	1	30429_elav_repo_NT	11.3662	speed
6	1	30429_elav_repo_NT	10.2431	speed
7	1	30429_elav_repo_NT	8.75761	speed
8	1	30429_elav_repo_NT	8.99939	speed
9	1	30429_elav_repo_NT	6.66168	speed
10	1	30429_elav_repo_NT	6.60866	speed
1	2	30429_elav_repo_NT	12.3143	speed
2	2	30429_elav_repo_NT	12.2822	speed
3	2	30429_elav_repo_NT	12.7836	speed
4	2	30429_elav_repo_NT	13.7	speed
5	2	30429_elav_repo_NT	12.4187	speed
6	2	30429_elav_repo_NT	12.0711	speed
7	2	30429_elav_repo_NT	10.4026	speed
8	2	30429_elav_repo_NT	9.83374	speed
9	2	30429_elav_repo_NT	9.11498	speed
10	2	30429_elav_repo_NT	9.69167	speed
1	3	30429_elav_repo_NT	12.7026	speed
2	3	30429_elav_repo_NT	12.7569	speed
3	3	30429_elav_repo_NT	13.5034	speed
4	3	30429_elav_repo_NT	11.6063	speed
5	3	30429_elav_repo_NT	12.1488	speed
6	3	30429_elav_repo_NT	12.1753	speed
7	3	30429_elav_repo_NT	9.31531	speed
8	3	30429_elav_repo_NT	9.30442	speed
9	3	30429_elav_repo_NT	7.75005	speed
10	3	30429_elav_repo_NT	7.42062	speed
1	4	30429_elav_repo_NT	13.5143	speed
2	4	30429_elav_repo_NT	12.4283	speed
3	4	30429_elav_repo_NT	13.7483	speed
4	4	30429_elav_repo_NT	13.0254	speed
5	4	30429_elav_repo_NT	12.6938	speed
6	4	30429_elav_repo_NT	12.0032	speed
7	4	30429_elav_repo_NT	9.76906	speed
8	4	30429_elav_repo_NT	8.96248	speed
9	4	30429_elav_repo_NT	7.48285	speed
10	4	30429_elav_repo_NT	7.57886	speed
1	1	30775_elav_repo_NT	12.3265	speed
3	1	30775_elav_repo_NT	12.6259	speed
4	1	30775_elav_repo_NT	11.8239	speed
5	1	30775_elav_repo_NT	11.218	speed
6	1	30775_elav_repo_NT	9.54321	speed
7	1	30775_elav_repo_NT	9.11499	speed
8	1	30775_elav_repo_NT	7.0568	speed
10	1	30775_elav_repo_NT	5.89969	speed
1	2	30775_elav_repo_NT	12.2429	speed
3	2	30775_elav_repo_NT	13.0751	speed
4	2	30775_elav_repo_NT	12.2419	speed
5	2	30775_elav_repo_NT	12.5444	speed
6	2	30775_elav_repo_NT	10.8952	speed
7	2	30775_elav_repo_NT	10.8995	speed
8	2	30775_elav_repo_NT	8.71163	speed
10	2	30775_elav_repo_NT	7.89673	speed
1	3	30775_elav_repo_NT	12.9603	speed
3	3	30775_elav_repo_NT	13.9287	speed
4	3	30775_elav_repo_NT	11.7825	speed
5	3	30775_elav_repo_NT	12.3862	speed
6	3	30775_elav_repo_NT	8.72236	speed
7	3	30775_elav_repo_NT	9.92932	speed
8	3	30775_elav_repo_NT	8.93487	speed
10	3	30775_elav_repo_NT	9.6752	speed
1	4	30775_elav_repo_NT	13.7678	speed
3	4	30775_elav_repo_NT	14.0671	speed
4	4	30775_elav_repo_NT	13.3135	speed
5	4	30775_elav_repo_NT	12.8974	speed
6	4	30775_elav_repo_NT	11.4149	speed
7	4	30775_elav_repo_NT	7.69938	speed
8	4	30775_elav_repo_NT	9.04962	speed
10	4	30775_elav_repo_NT	8.126	speed
1	5	30775_elav_repo_NT	13.4781	speed
3	5	30775_elav_repo_NT	14.3712	speed
4	5	30775_elav_repo_NT	13.6263	speed
5	5	30775_elav_repo_NT	12.4993	speed
6	5	30775_elav_repo_NT	11.862	speed
7	5	30775_elav_repo_NT	11.2727	speed
8	5	30775_elav_repo_NT	8.6757	speed
10	5	30775_elav_repo_NT	8.77456	speed
1	6	30775_elav_repo_NT	12.234	speed
3	6	30775_elav_repo_NT	13.012	speed
4	6	30775_elav_repo_NT	13.1089	speed
5	6	30775_elav_repo_NT	11.6835	speed
6	6	30775_elav_repo_NT	10.5422	speed
7	6	30775_elav_repo_NT	9.13481	speed
8	6	30775_elav_repo_NT	7.96097	speed
10	6	30775_elav_repo_NT	7.6101	speed
1	1	32289_elav_repo_NT	12.1808	speed
3	1	32289_elav_repo_NT	14.4637	speed
4	1	32289_elav_repo_NT	14.7745	speed
5	1	32289_elav_repo_NT	13.1444	speed
6	1	32289_elav_repo_NT	12.0877	speed
7	1	32289_elav_repo_NT	11.5892	speed
8	1	32289_elav_repo_NT	9.59235	speed
10	1	32289_elav_repo_NT	9.62749	speed
1	2	32289_elav_repo_NT	12.9464	speed
3	2	32289_elav_repo_NT	13.7247	speed
4	2	32289_elav_repo_NT	13.2973	speed
5	2	32289_elav_repo_NT	12.0775	speed
6	2	32289_elav_repo_NT	11.1771	speed
7	2	32289_elav_repo_NT	11.1606	speed
8	2	32289_elav_repo_NT	9.29797	speed
10	2	32289_elav_repo_NT	8.97197	speed
1	3	32289_elav_repo_NT	13.6114	speed
3	3	32289_elav_repo_NT	14.7398	speed
4	3	32289_elav_repo_NT	14.744	speed
5	3	32289_elav_repo_NT	13.4489	speed
6	3	32289_elav_repo_NT	12.0111	speed
7	3	32289_elav_repo_NT	11.2662	speed
8	3	32289_elav_repo_NT	9.9245	speed
10	3	32289_elav_repo_NT	9.09356	speed
1	4	32289_elav_repo_NT	13.173	speed
3	4	32289_elav_repo_NT	14.2078	speed
4	4	32289_elav_repo_NT	13.9798	speed
5	4	32289_elav_repo_NT	13.2444	speed
6	4	32289_elav_repo_NT	11.8993	speed
7	4	32289_elav_repo_NT	10.8057	speed
8	4	32289_elav_repo_NT	9.36254	speed
10	4	32289_elav_repo_NT	8.73803	speed
1	5	32289_elav_repo_NT	12.7001	speed
3	5	32289_elav_repo_NT	13.7774	speed
4	5	32289_elav_repo_NT	14.8177	speed
5	5	32289_elav_repo_NT	12.8834	speed
6	5	32289_elav_repo_NT	11.9126	speed
7	5	32289_elav_repo_NT	10.4221	speed
8	5	32289_elav_repo_NT	9.83479	speed
10	5	32289_elav_repo_NT	9.71201	speed
1	6	32289_elav_repo_NT	13.2443	speed
3	6	32289_elav_repo_NT	13.2431	speed
4	6	32289_elav_repo_NT	14.3546	speed
5	6	32289_elav_repo_NT	12.2123	speed
6	6	32289_elav_repo_NT	11.4374	speed
7	6	32289_elav_repo_NT	10.9874	speed
8	6	32289_elav_repo_NT	10.0325	speed
10	6	32289_elav_repo_NT	8.58354	speed
1	1	35691_elav_repo_NT	13.1442	speed
2	1	35691_elav_repo_NT	13.2275	speed
3	1	35691_elav_repo_NT	13.6381	speed
4	1	35691_elav_repo_NT	12.5668	speed
5	1	35691_elav_repo_NT	12.1701	speed
6	1	35691_elav_repo_NT	10.9677	speed
7	1	35691_elav_repo_NT	8.50105	speed
8	1	35691_elav_repo_NT	8.35881	speed
9	1	35691_elav_repo_NT	7.57858	speed
10	1	35691_elav_repo_NT	4.10211	speed
1	1	51350_elav_repo_NT	13.096	speed
3	1	51350_elav_repo_NT	13.1231	speed
4	1	51350_elav_repo_NT	11.9039	speed
5	1	51350_elav_repo_NT	12.5924	speed
6	1	51350_elav_repo_NT	10.8615	speed
7	1	51350_elav_repo_NT	10.3447	speed
8	1	51350_elav_repo_NT	8.66216	speed
9	1	51350_elav_repo_NT	8.16584	speed
10	1	51350_elav_repo_NT	9.07816	speed
1	2	51350_elav_repo_NT	11.8885	speed
3	2	51350_elav_repo_NT	12.8392	speed
4	2	51350_elav_repo_NT	12.3772	speed
5	2	51350_elav_repo_NT	11.5206	speed
6	2	51350_elav_repo_NT	9.6666	speed
7	2	51350_elav_repo_NT	10.1133	speed
8	2	51350_elav_repo_NT	8.96	speed
9	2	51350_elav_repo_NT	4.68119	speed
10	2	51350_elav_repo_NT	5.50426	speed
1	3	51350_elav_repo_NT	13.5283	speed
3	3	51350_elav_repo_NT	13.9406	speed
4	3	51350_elav_repo_NT	14.2739	speed
5	3	51350_elav_repo_NT	12.8955	speed
6	3	51350_elav_repo_NT	11.3272	speed
7	3	51350_elav_repo_NT	10.977	speed
8	3	51350_elav_repo_NT	9.39631	speed
9	3	51350_elav_repo_NT	8.58522	speed
10	3	51350_elav_repo_NT	9.15902	speed
1	4	51350_elav_repo_NT	11.6477	speed
3	4	51350_elav_repo_NT	12.8929	speed
4	4	51350_elav_repo_NT	11.9799	speed
5	4	51350_elav_repo_NT	11.3082	speed
6	4	51350_elav_repo_NT	10.7624	speed
7	4	51350_elav_repo_NT	9.9035	speed
8	4	51350_elav_repo_NT	5.96468	speed
9	4	51350_elav_repo_NT	6.67839	speed
10	4	51350_elav_repo_NT	7.13615	speed
1	1	5406R_2_elav_repo_NT	11.6872	speed
2	1	5406R_2_elav_repo_NT	12.6719	speed
3	1	5406R_2_elav_repo_NT	13.8608	speed
4	1	5406R_2_elav_repo_NT	13.7658	speed
5	1	5406R_2_elav_repo_NT	13.356	speed
6	1	5406R_2_elav_repo_NT	13.4712	speed
7	1	5406R_2_elav_repo_NT	11.659	speed
8	1	5406R_2_elav_repo_NT	12.1588	speed
9	1	5406R_2_elav_repo_NT	11.9437	speed
10	1	5406R_2_elav_repo_NT	13.05	speed
1	2	5406R_2_elav_repo_NT	13.691	speed
2	2	5406R_2_elav_repo_NT	12.3048	speed
3	2	5406R_2_elav_repo_NT	14.0585	speed
4	2	5406R_2_elav_repo_NT	11.4468	speed
5	2	5406R_2_elav_repo_NT	12.5739	speed
6	2	5406R_2_elav_repo_NT	13.1529	speed
7	2	5406R_2_elav_repo_NT	10.1467	speed
8	2	5406R_2_elav_repo_NT	10.8706	speed
9	2	5406R_2_elav_repo_NT	9.99957	speed
10	2	5406R_2_elav_repo_NT	10.1542	speed
1	3	5406R_2_elav_repo_NT	11.7694	speed
2	3	5406R_2_elav_repo_NT	12.4495	speed
3	3	5406R_2_elav_repo_NT	13.5	speed
4	3	5406R_2_elav_repo_NT	14.3573	speed
5	3	5406R_2_elav_repo_NT	13.273	speed
6	3	5406R_2_elav_repo_NT	12.6222	speed
7	3	5406R_2_elav_repo_NT	9.70918	speed
8	3	5406R_2_elav_repo_NT	10.7282	speed
9	3	5406R_2_elav_repo_NT	9.04875	speed
10	3	5406R_2_elav_repo_NT	9.56882	speed
1	4	5406R_2_elav_repo_NT	13.9669	speed
2	4	5406R_2_elav_repo_NT	13.94	speed
3	4	5406R_2_elav_repo_NT	13.7683	speed
4	4	5406R_2_elav_repo_NT	12.9836	speed
5	4	5406R_2_elav_repo_NT	12.8509	speed
6	4	5406R_2_elav_repo_NT	12.733	speed
7	4	5406R_2_elav_repo_NT	10.9719	speed
8	4	5406R_2_elav_repo_NT	10.2658	speed
9	4	5406R_2_elav_repo_NT	9.59075	speed
10	4	5406R_2_elav_repo_NT	9.13788	speed
1	5	5406R_2_elav_repo_NT	13.91	speed
2	5	5406R_2_elav_repo_NT	11.8697	speed
3	5	5406R_2_elav_repo_NT	13.5495	speed
4	5	5406R_2_elav_repo_NT	13.9652	speed
5	5	5406R_2_elav_repo_NT	11.7365	speed
6	5	5406R_2_elav_repo_NT	12.6261	speed
7	5	5406R_2_elav_repo_NT	9.91424	speed
8	5	5406R_2_elav_repo_NT	9.73026	speed
9	5	5406R_2_elav_repo_NT	8.37434	speed
10	5	5406R_2_elav_repo_NT	5.95826	speed
1	6	5406R_3_elav_repo_NT	12.3686	speed
3	6	5406R_3_elav_repo_NT	13.6815	speed
4	6	5406R_3_elav_repo_NT	14.7087	speed
5	6	5406R_3_elav_repo_NT	14.1551	speed
6	6	5406R_3_elav_repo_NT	13.7615	speed
7	6	5406R_3_elav_repo_NT	14.3409	speed
8	6	5406R_3_elav_repo_NT	11.6948	speed
10	6	5406R_3_elav_repo_NT	12.2337	speed
1	1	61696_elav_repo_NT	12.0811	speed
1	2	61696_elav_repo_NT	13.9826	speed
3	1	61696_elav_repo_NT	12.941	speed
3	2	61696_elav_repo_NT	13.7515	speed
4	1	61696_elav_repo_NT	10.9219	speed
4	2	61696_elav_repo_NT	13.6484	speed
5	1	61696_elav_repo_NT	9.96198	speed
5	2	61696_elav_repo_NT	11.1124	speed
6	1	61696_elav_repo_NT	7.53909	speed
6	2	61696_elav_repo_NT	9.86356	speed
7	1	61696_elav_repo_NT	7.66531	speed
7	2	61696_elav_repo_NT	8.46983	speed
8	1	61696_elav_repo_NT	5.93556	speed
8	2	61696_elav_repo_NT	7.96342	speed
10	1	61696_elav_repo_NT	5.32644	speed
10	2	61696_elav_repo_NT	7.00162	speed
1	3	61696_elav_repo_NT	14.0886	speed
2	3	61696_elav_repo_NT	14.9272	speed
3	3	61696_elav_repo_NT	13.8536	speed
4	3	61696_elav_repo_NT	12.304	speed
5	3	61696_elav_repo_NT	11.0259	speed
6	3	61696_elav_repo_NT	8.87184	speed
7	3	61696_elav_repo_NT	6.50683	speed
8	3	61696_elav_repo_NT	7.23312	speed
9	3	61696_elav_repo_NT	7.61752	speed
1	1	65295_elav_repo_NT	12.7249	speed
2	1	65295_elav_repo_NT	12.6693	speed
3	1	65295_elav_repo_NT	12.5364	speed
4	1	65295_elav_repo_NT	13.4187	speed
5	1	65295_elav_repo_NT	12.4182	speed
6	1	65295_elav_repo_NT	11.7145	speed
7	1	65295_elav_repo_NT	10.3817	speed
8	1	65295_elav_repo_NT	10.3074	speed
9	1	65295_elav_repo_NT	9.80744	speed
10	1	65295_elav_repo_NT	9.71067	speed
1	2	65295_elav_repo_NT	13.1529	speed
2	2	65295_elav_repo_NT	13.3134	speed
3	2	65295_elav_repo_NT	13.5753	speed
4	2	65295_elav_repo_NT	13.2676	speed
5	2	65295_elav_repo_NT	11.9807	speed
6	2	65295_elav_repo_NT	12.4921	speed
7	2	65295_elav_repo_NT	11.0604	speed
8	2	65295_elav_repo_NT	9.09747	speed
9	2	65295_elav_repo_NT	8.12018	speed
10	2	65295_elav_repo_NT	8.21877	speed
1	3	65295_elav_repo_NT	12.8444	speed
2	3	65295_elav_repo_NT	11.8912	speed
3	3	65295_elav_repo_NT	13.2433	speed
4	3	65295_elav_repo_NT	13.0756	speed
5	3	65295_elav_repo_NT	11.6229	speed
6	3	65295_elav_repo_NT	11.0963	speed
7	3	65295_elav_repo_NT	9.94425	speed
8	3	65295_elav_repo_NT	9.58425	speed
9	3	65295_elav_repo_NT	8.50804	speed
10	3	65295_elav_repo_NT	7.95036	speed
1	4	65295_elav_repo_NT	13.6442	speed
2	4	65295_elav_repo_NT	12.8515	speed
3	4	65295_elav_repo_NT	13.3009	speed
4	4	65295_elav_repo_NT	13.5962	speed
5	4	65295_elav_repo_NT	12.3746	speed
6	4	65295_elav_repo_NT	11.4649	speed
7	4	65295_elav_repo_NT	10.2513	speed
8	4	65295_elav_repo_NT	9.51909	speed
9	4	65295_elav_repo_NT	8.03629	speed
10	4	65295_elav_repo_NT	5.2045	speed
1	5	65295_elav_repo_NT	12.6469	speed
2	5	65295_elav_repo_NT	11.3165	speed
3	5	65295_elav_repo_NT	12.945	speed
4	5	65295_elav_repo_NT	11.3158	speed
5	5	65295_elav_repo_NT	11.567	speed
6	5	65295_elav_repo_NT	10.9257	speed
7	5	65295_elav_repo_NT	9.59417	speed
8	5	65295_elav_repo_NT	8.55525	speed
9	5	65295_elav_repo_NT	7.69785	speed
10	5	65295_elav_repo_NT	7.38796	speed
1	1	66169_elav_repo_NT	11.2785	speed
2	1	66169_elav_repo_NT	11.9587	speed
3	1	66169_elav_repo_NT	13.1922	speed
4	1	66169_elav_repo_NT	14.3777	speed
5	1	66169_elav_repo_NT	13.7787	speed
6	1	66169_elav_repo_NT	14.4155	speed
7	1	66169_elav_repo_NT	11.6082	speed
8	1	66169_elav_repo_NT	11.9883	speed
9	1	66169_elav_repo_NT	11.416	speed
10	1	66169_elav_repo_NT	11.6895	speed
1	2	66169_elav_repo_NT	12.3794	speed
2	2	66169_elav_repo_NT	13.5328	speed
3	2	66169_elav_repo_NT	15.0178	speed
4	2	66169_elav_repo_NT	14.6632	speed
5	2	66169_elav_repo_NT	14.2651	speed
6	2	66169_elav_repo_NT	15.2103	speed
7	2	66169_elav_repo_NT	13.5104	speed
8	2	66169_elav_repo_NT	13.3127	speed
9	2	66169_elav_repo_NT	13.6113	speed
10	2	66169_elav_repo_NT	13.3394	speed
1	3	66169_elav_repo_NT	11.8214	speed
2	3	66169_elav_repo_NT	13.1183	speed
3	3	66169_elav_repo_NT	14.4306	speed
4	3	66169_elav_repo_NT	14.3123	speed
5	3	66169_elav_repo_NT	13.8	speed
6	3	66169_elav_repo_NT	14.2536	speed
7	3	66169_elav_repo_NT	12.8687	speed
8	3	66169_elav_repo_NT	13.0191	speed
9	3	66169_elav_repo_NT	12.5123	speed
10	3	66169_elav_repo_NT	12.3509	speed
1	4	66169_elav_repo_NT	11.7763	speed
2	4	66169_elav_repo_NT	12.4733	speed
3	4	66169_elav_repo_NT	13.3462	speed
4	4	66169_elav_repo_NT	14.5864	speed
5	4	66169_elav_repo_NT	13.0586	speed
6	4	66169_elav_repo_NT	13.5996	speed
7	4	66169_elav_repo_NT	12.2939	speed
8	4	66169_elav_repo_NT	13.1698	speed
9	4	66169_elav_repo_NT	13.1214	speed
10	4	66169_elav_repo_NT	11.191	speed
1	5	66169_elav_repo_NT	12.2431	speed
2	5	66169_elav_repo_NT	14.0542	speed
3	5	66169_elav_repo_NT	13.9606	speed
4	5	66169_elav_repo_NT	14.3823	speed
5	5	66169_elav_repo_NT	13.5478	speed
6	5	66169_elav_repo_NT	13.5184	speed
7	5	66169_elav_repo_NT	12.1218	speed
8	5	66169_elav_repo_NT	12.5203	speed
9	5	66169_elav_repo_NT	12.1675	speed
10	5	66169_elav_repo_NT	11.6291	speed
1	6	66169_elav_repo_NT	11.3591	speed
2	6	66169_elav_repo_NT	11.9631	speed
3	6	66169_elav_repo_NT	12.585	speed
4	6	66169_elav_repo_NT	15.0128	speed
5	6	66169_elav_repo_NT	13.4409	speed
6	6	66169_elav_repo_NT	14.9655	speed
7	6	66169_elav_repo_NT	13.3427	speed
8	6	66169_elav_repo_NT	13.4138	speed
9	6	66169_elav_repo_NT	14.6162	speed
10	6	66169_elav_repo_NT	11.5128	speed
1	1	6757R_1_elav_repo_NT	11.6014	speed
3	1	6757R_1_elav_repo_NT	13.6712	speed
4	1	6757R_1_elav_repo_NT	13.6676	speed
5	1	6757R_1_elav_repo_NT	13.2933	speed
6	1	6757R_1_elav_repo_NT	13.0939	speed
7	1	6757R_1_elav_repo_NT	12.0295	speed
8	1	6757R_1_elav_repo_NT	11.0215	speed
9	1	6757R_1_elav_repo_NT	10.6798	speed
10	1	6757R_1_elav_repo_NT	8.23636	speed
1	2	6757R_1_elav_repo_NT	10.7066	speed
3	2	6757R_1_elav_repo_NT	12.5955	speed
4	2	6757R_1_elav_repo_NT	12.6818	speed
5	2	6757R_1_elav_repo_NT	12.9214	speed
6	2	6757R_1_elav_repo_NT	12.7369	speed
7	2	6757R_1_elav_repo_NT	10.9849	speed
8	2	6757R_1_elav_repo_NT	10.53	speed
9	2	6757R_1_elav_repo_NT	10.9077	speed
10	2	6757R_1_elav_repo_NT	10.5539	speed
1	3	6757R_1_elav_repo_NT	8.95557	speed
3	3	6757R_1_elav_repo_NT	12.5606	speed
4	3	6757R_1_elav_repo_NT	11.8657	speed
5	3	6757R_1_elav_repo_NT	12.1363	speed
6	3	6757R_1_elav_repo_NT	11.4573	speed
7	3	6757R_1_elav_repo_NT	11.1232	speed
8	3	6757R_1_elav_repo_NT	10.2099	speed
9	3	6757R_1_elav_repo_NT	6.23697	speed
10	3	6757R_1_elav_repo_NT	8.63097	speed
1	4	6757R_1_elav_repo_NT	11.2667	speed
3	4	6757R_1_elav_repo_NT	12.5894	speed
4	4	6757R_1_elav_repo_NT	12.991	speed
5	4	6757R_1_elav_repo_NT	13.1806	speed
6	4	6757R_1_elav_repo_NT	8.91092	speed
7	4	6757R_1_elav_repo_NT	12.4921	speed
8	4	6757R_1_elav_repo_NT	7.08725	speed
9	4	6757R_1_elav_repo_NT	11.051	speed
10	4	6757R_1_elav_repo_NT	11.2964	speed
1	5	6757R_1_elav_repo_NT	11.5904	speed
3	5	6757R_1_elav_repo_NT	13.5313	speed
4	5	6757R_1_elav_repo_NT	14.066	speed
5	5	6757R_1_elav_repo_NT	13.5027	speed
6	5	6757R_1_elav_repo_NT	13.2404	speed
7	5	6757R_1_elav_repo_NT	11.8714	speed
8	5	6757R_1_elav_repo_NT	9.47863	speed
9	5	6757R_1_elav_repo_NT	10.9368	speed
10	5	6757R_1_elav_repo_NT	10.8295	speed
1	6	6757R_1_elav_repo_NT	12.2333	speed
3	6	6757R_1_elav_repo_NT	13.0922	speed
4	6	6757R_1_elav_repo_NT	12.7291	speed
5	6	6757R_1_elav_repo_NT	11.7806	speed
6	6	6757R_1_elav_repo_NT	11.8623	speed
7	6	6757R_1_elav_repo_NT	11.2173	speed
8	6	6757R_1_elav_repo_NT	8.8839	speed
9	6	6757R_1_elav_repo_NT	9.78552	speed
10	6	6757R_1_elav_repo_NT	8.91067	speed
1	1	8567_elav_repo_NT	13.7801	speed
2	1	8567_elav_repo_NT	13.4608	speed
3	1	8567_elav_repo_NT	12.5823	speed
4	1	8567_elav_repo_NT	11.1383	speed
5	1	8567_elav_repo_NT	12.8549	speed
6	1	8567_elav_repo_NT	12.1002	speed
7	1	8567_elav_repo_NT	10.8406	speed
8	1	8567_elav_repo_NT	10.8647	speed
9	1	8567_elav_repo_NT	10.8019	speed
10	1	8567_elav_repo_NT	10.6266	speed
1	2	8567_elav_repo_NT	13.7935	speed
2	2	8567_elav_repo_NT	12.218	speed
3	2	8567_elav_repo_NT	12.7382	speed
4	2	8567_elav_repo_NT	11.744	speed
5	2	8567_elav_repo_NT	13.0863	speed
6	2	8567_elav_repo_NT	11.492	speed
7	2	8567_elav_repo_NT	10.9395	speed
8	2	8567_elav_repo_NT	10.1469	speed
9	2	8567_elav_repo_NT	10.3432	speed
10	2	8567_elav_repo_NT	10.0327	speed
1	3	8567_elav_repo_NT	14.3475	speed
2	3	8567_elav_repo_NT	13.5873	speed
3	3	8567_elav_repo_NT	13.7526	speed
4	3	8567_elav_repo_NT	13.0515	speed
5	3	8567_elav_repo_NT	12.7584	speed
6	3	8567_elav_repo_NT	12.127	speed
7	3	8567_elav_repo_NT	10.4442	speed
8	3	8567_elav_repo_NT	10.0216	speed
9	3	8567_elav_repo_NT	11.0611	speed
1	4	8567_elav_repo_NT	12.5276	speed
2	4	8567_elav_repo_NT	12.4993	speed
3	4	8567_elav_repo_NT	13.3721	speed
4	4	8567_elav_repo_NT	13.5822	speed
5	4	8567_elav_repo_NT	12.1002	speed
6	4	8567_elav_repo_NT	12.2122	speed
7	4	8567_elav_repo_NT	8.80675	speed
8	4	8567_elav_repo_NT	9.91506	speed
9	4	8567_elav_repo_NT	8.35462	speed
10	4	8567_elav_repo_NT	5.73802	speed
1	5	8567_elav_repo_NT	8.93929	speed
2	5	8567_elav_repo_NT	11.7471	speed
3	5	8567_elav_repo_NT	12.7716	speed
4	5	8567_elav_repo_NT	13.2467	speed
5	5	8567_elav_repo_NT	12.2051	speed
6	5	8567_elav_repo_NT	12.3695	speed
7	5	8567_elav_repo_NT	8.45616	speed
8	5	8567_elav_repo_NT	9.09641	speed
9	5	8567_elav_repo_NT	8.94392	speed
10	5	8567_elav_repo_NT	8.60934	speed
1	6	8567_elav_repo_NT	11.8145	speed
2	6	8567_elav_repo_NT	12.0789	speed
3	6	8567_elav_repo_NT	13.3415	speed
4	6	8567_elav_repo_NT	11.5572	speed
5	6	8567_elav_repo_NT	11.3037	speed
6	6	8567_elav_repo_NT	11.6911	speed
7	6	8567_elav_repo_NT	9.46307	speed
8	6	8567_elav_repo_NT	10.8098	speed
9	6	8567_elav_repo_NT	9.44795	speed
10	6	8567_elav_repo_NT	9.71455	speed
1	7	8567_elav_repo_NT	11.1993	speed
2	7	8567_elav_repo_NT	12.0404	speed
3	7	8567_elav_repo_NT	13.3087	speed
4	7	8567_elav_repo_NT	11.7494	speed
5	7	8567_elav_repo_NT	10.9484	speed
6	7	8567_elav_repo_NT	9.86508	speed
7	7	8567_elav_repo_NT	9.53166	speed
8	7	8567_elav_repo_NT	9.96568	speed
9	7	8567_elav_repo_NT	7.82649	speed
10	7	8567_elav_repo_NT	7.66456	speed
1	8	8567_elav_repo_NT	12.6756	speed
2	8	8567_elav_repo_NT	11.7677	speed
3	8	8567_elav_repo_NT	14.4347	speed
4	8	8567_elav_repo_NT	13.9182	speed
5	8	8567_elav_repo_NT	12.6882	speed
6	8	8567_elav_repo_NT	12.9779	speed
7	8	8567_elav_repo_NT	9.57228	speed
8	8	8567_elav_repo_NT	9.37191	speed
9	8	8567_elav_repo_NT	8.59284	speed
10	8	8567_elav_repo_NT	8.10149	speed
1	1	9109_elav_repo_NT	13.4041	speed
2	1	9109_elav_repo_NT	13.2864	speed
3	1	9109_elav_repo_NT	14.2384	speed
4	1	9109_elav_repo_NT	15.1143	speed
5	1	9109_elav_repo_NT	13.9382	speed
6	1	9109_elav_repo_NT	13.4441	speed
7	1	9109_elav_repo_NT	10.0966	speed
8	1	9109_elav_repo_NT	11.5339	speed
9	1	9109_elav_repo_NT	13.03	speed
10	1	9109_elav_repo_NT	13.1113	speed
1	2	9109_elav_repo_NT	14.7365	speed
2	2	9109_elav_repo_NT	14.1698	speed
3	2	9109_elav_repo_NT	14.9317	speed
4	2	9109_elav_repo_NT	16.2193	speed
5	2	9109_elav_repo_NT	15.0813	speed
6	2	9109_elav_repo_NT	15.3858	speed
7	2	9109_elav_repo_NT	13.818	speed
8	2	9109_elav_repo_NT	13.2499	speed
9	2	9109_elav_repo_NT	12.6479	speed
10	2	9109_elav_repo_NT	14.0953	speed
1	3	9109_elav_repo_NT	14.4726	speed
2	3	9109_elav_repo_NT	13.6016	speed
3	3	9109_elav_repo_NT	13.8472	speed
4	3	9109_elav_repo_NT	15.0645	speed
5	3	9109_elav_repo_NT	14.1308	speed
6	3	9109_elav_repo_NT	14.6598	speed
7	3	9109_elav_repo_NT	13.3804	speed
8	3	9109_elav_repo_NT	13.6072	speed
9	3	9109_elav_repo_NT	13.1627	speed
10	3	9109_elav_repo_NT	14.2385	speed
1	4	9109_elav_repo_NT	14.6784	speed
2	4	9109_elav_repo_NT	12.9198	speed
3	4	9109_elav_repo_NT	14.2043	speed
4	4	9109_elav_repo_NT	15.4583	speed
5	4	9109_elav_repo_NT	14.53	speed
6	4	9109_elav_repo_NT	14.6084	speed
7	4	9109_elav_repo_NT	13.231	speed
8	4	9109_elav_repo_NT	13.5712	speed
9	4	9109_elav_repo_NT	13.9095	speed
10	4	9109_elav_repo_NT	14.6885	speed
1	5	9109_elav_repo_NT	14.2859	speed
2	5	9109_elav_repo_NT	13.334	speed
3	5	9109_elav_repo_NT	14.1587	speed
4	5	9109_elav_repo_NT	14.6881	speed
5	5	9109_elav_repo_NT	13.5037	speed
6	5	9109_elav_repo_NT	14.344	speed
7	5	9109_elav_repo_NT	12.7747	speed
8	5	9109_elav_repo_NT	13.8844	speed
9	5	9109_elav_repo_NT	11.0248	speed
10	5	9109_elav_repo_NT	12.6623	speed
1	6	9109_elav_repo_NT	13.3026	speed
2	6	9109_elav_repo_NT	14.5754	speed
3	6	9109_elav_repo_NT	14.4565	speed
4	6	9109_elav_repo_NT	14.9523	speed
5	6	9109_elav_repo_NT	13.7007	speed
6	6	9109_elav_repo_NT	14.4386	speed
7	6	9109_elav_repo_NT	13.3868	speed
8	6	9109_elav_repo_NT	11.266	speed
9	6	9109_elav_repo_NT	12.1458	speed
10	6	9109_elav_repo_NT	11.9782	speed
1	1	P10_C8_elav_repo_NT	13.7733	speed
2	1	P10_C8_elav_repo_NT	14.3752	speed
3	1	P10_C8_elav_repo_NT	14.8557	speed
4	1	P10_C8_elav_repo_NT	12.1599	speed
5	1	P10_C8_elav_repo_NT	12.4337	speed
6	1	P10_C8_elav_repo_NT	11.8985	speed
7	1	P10_C8_elav_repo_NT	11.3174	speed
8	1	P10_C8_elav_repo_NT	10.37	speed
9	1	P10_C8_elav_repo_NT	6.56968	speed
10	1	P10_C8_elav_repo_NT	8.49905	speed
1	2	P10_C8_elav_repo_NT	12.9111	speed
2	2	P10_C8_elav_repo_NT	12.5923	speed
3	2	P10_C8_elav_repo_NT	11.805	speed
4	2	P10_C8_elav_repo_NT	10.8291	speed
5	2	P10_C8_elav_repo_NT	10.3401	speed
6	2	P10_C8_elav_repo_NT	8.62236	speed
7	2	P10_C8_elav_repo_NT	5.36767	speed
8	2	P10_C8_elav_repo_NT	5.00031	speed
9	2	P10_C8_elav_repo_NT	6.16893	speed
10	2	P10_C8_elav_repo_NT	4.96411	speed
1	3	P10_C8_elav_repo_NT	11.2668	speed
2	3	P10_C8_elav_repo_NT	12.2191	speed
3	3	P10_C8_elav_repo_NT	13.4595	speed
4	3	P10_C8_elav_repo_NT	11.7456	speed
5	3	P10_C8_elav_repo_NT	12.141	speed
6	3	P10_C8_elav_repo_NT	10.5665	speed
7	3	P10_C8_elav_repo_NT	7.78223	speed
8	3	P10_C8_elav_repo_NT	7.55557	speed
9	3	P10_C8_elav_repo_NT	7.14022	speed
10	3	P10_C8_elav_repo_NT	5.24111	speed
1	4	P10_C8_elav_repo_NT	13.3351	speed
2	4	P10_C8_elav_repo_NT	13.1574	speed
3	4	P10_C8_elav_repo_NT	13.7375	speed
4	4	P10_C8_elav_repo_NT	13.8822	speed
5	4	P10_C8_elav_repo_NT	12.5926	speed
6	4	P10_C8_elav_repo_NT	11.6889	speed
7	4	P10_C8_elav_repo_NT	9.83869	speed
8	4	P10_C8_elav_repo_NT	8.27426	speed
9	4	P10_C8_elav_repo_NT	6.89069	speed
10	4	P10_C8_elav_repo_NT	6.89406	speed
1	1	P11_A12_elav_repo_NT	12.5843	speed
2	1	P11_A12_elav_repo_NT	12.8001	speed
3	1	P11_A12_elav_repo_NT	12.722	speed
4	1	P11_A12_elav_repo_NT	12.6513	speed
5	1	P11_A12_elav_repo_NT	11.995	speed
6	1	P11_A12_elav_repo_NT	12.336	speed
7	1	P11_A12_elav_repo_NT	11.1937	speed
8	1	P11_A12_elav_repo_NT	9.76064	speed
9	1	P11_A12_elav_repo_NT	10.4957	speed
10	1	P11_A12_elav_repo_NT	9.90783	speed
1	2	P11_A12_elav_repo_NT	13.0605	speed
2	2	P11_A12_elav_repo_NT	13.2744	speed
3	2	P11_A12_elav_repo_NT	14.1344	speed
4	2	P11_A12_elav_repo_NT	13.4454	speed
5	2	P11_A12_elav_repo_NT	14.5639	speed
6	2	P11_A12_elav_repo_NT	13.6821	speed
7	2	P11_A12_elav_repo_NT	12.0305	speed
8	2	P11_A12_elav_repo_NT	11.8499	speed
9	2	P11_A12_elav_repo_NT	11.0193	speed
10	2	P11_A12_elav_repo_NT	10.8277	speed
1	3	P11_A12_elav_repo_NT	11.2965	speed
2	3	P11_A12_elav_repo_NT	12.6449	speed
3	3	P11_A12_elav_repo_NT	12.272	speed
4	3	P11_A12_elav_repo_NT	11.7216	speed
5	3	P11_A12_elav_repo_NT	11.2005	speed
6	3	P11_A12_elav_repo_NT	11.1186	speed
7	3	P11_A12_elav_repo_NT	9.29568	speed
8	3	P11_A12_elav_repo_NT	9.16253	speed
9	3	P11_A12_elav_repo_NT	8.84519	speed
10	3	P11_A12_elav_repo_NT	9.28279	speed
1	4	P11_A12_elav_repo_NT	13.0414	speed
2	4	P11_A12_elav_repo_NT	12.9058	speed
3	4	P11_A12_elav_repo_NT	13.3091	speed
4	4	P11_A12_elav_repo_NT	13.755	speed
5	4	P11_A12_elav_repo_NT	13.1109	speed
6	4	P11_A12_elav_repo_NT	12.2953	speed
7	4	P11_A12_elav_repo_NT	11.099	speed
8	4	P11_A12_elav_repo_NT	10.7697	speed
9	4	P11_A12_elav_repo_NT	9.8681	speed
10	4	P11_A12_elav_repo_NT	10.14	speed
1	5	P11_A12_elav_repo_NT	13.8272	speed
2	5	P11_A12_elav_repo_NT	13.5608	speed
3	5	P11_A12_elav_repo_NT	14.5325	speed
4	5	P11_A12_elav_repo_NT	13.6092	speed
5	5	P11_A12_elav_repo_NT	12.7242	speed
6	5	P11_A12_elav_repo_NT	13.4974	speed
7	5	P11_A12_elav_repo_NT	11.6685	speed
8	5	P11_A12_elav_repo_NT	10.9296	speed
9	5	P11_A12_elav_repo_NT	10.6505	speed
10	5	P11_A12_elav_repo_NT	10.7068	speed
1	6	P11_A12_elav_repo_NT	12.2727	speed
2	6	P11_A12_elav_repo_NT	13.8741	speed
3	6	P11_A12_elav_repo_NT	14.6214	speed
4	6	P11_A12_elav_repo_NT	13.5907	speed
5	6	P11_A12_elav_repo_NT	14.222	speed
6	6	P11_A12_elav_repo_NT	13.3457	speed
7	6	P11_A12_elav_repo_NT	12.6887	speed
8	6	P11_A12_elav_repo_NT	11.594	speed
9	6	P11_A12_elav_repo_NT	11.6044	speed
10	6	P11_A12_elav_repo_NT	10.8843	speed
1	1	P11_B10_elav_repo_NT	12.3446	speed
2	1	P11_B10_elav_repo_NT	13.6985	speed
3	1	P11_B10_elav_repo_NT	13.1303	speed
4	1	P11_B10_elav_repo_NT	13.3841	speed
5	1	P11_B10_elav_repo_NT	12.9649	speed
6	1	P11_B10_elav_repo_NT	11.5273	speed
7	1	P11_B10_elav_repo_NT	10.5606	speed
8	1	P11_B10_elav_repo_NT	9.66166	speed
9	1	P11_B10_elav_repo_NT	7.57026	speed
10	1	P11_B10_elav_repo_NT	6.78986	speed
1	2	P11_B10_elav_repo_NT	12.7286	speed
2	2	P11_B10_elav_repo_NT	13.7571	speed
3	2	P11_B10_elav_repo_NT	13.4393	speed
4	2	P11_B10_elav_repo_NT	12.9271	speed
5	2	P11_B10_elav_repo_NT	11.9997	speed
6	2	P11_B10_elav_repo_NT	11.175	speed
7	2	P11_B10_elav_repo_NT	8.65148	speed
8	2	P11_B10_elav_repo_NT	8.42363	speed
9	2	P11_B10_elav_repo_NT	7.35627	speed
10	2	P11_B10_elav_repo_NT	6.43339	speed
1	3	P11_B10_elav_repo_NT	12.1722	speed
2	3	P11_B10_elav_repo_NT	14.2639	speed
3	3	P11_B10_elav_repo_NT	14.8162	speed
4	3	P11_B10_elav_repo_NT	14.2074	speed
5	3	P11_B10_elav_repo_NT	12.2074	speed
6	3	P11_B10_elav_repo_NT	12.4148	speed
7	3	P11_B10_elav_repo_NT	10.7242	speed
8	3	P11_B10_elav_repo_NT	9.96666	speed
9	3	P11_B10_elav_repo_NT	8.30299	speed
10	3	P11_B10_elav_repo_NT	6.71271	speed
1	4	P11_B10_elav_repo_NT	8.7669	speed
2	4	P11_B10_elav_repo_NT	13.9087	speed
3	4	P11_B10_elav_repo_NT	13.2385	speed
4	4	P11_B10_elav_repo_NT	13.7064	speed
5	4	P11_B10_elav_repo_NT	13.1595	speed
6	4	P11_B10_elav_repo_NT	11.9624	speed
7	4	P11_B10_elav_repo_NT	9.76611	speed
8	4	P11_B10_elav_repo_NT	9.28832	speed
9	4	P11_B10_elav_repo_NT	8.74235	speed
10	4	P11_B10_elav_repo_NT	8.08448	speed
1	5	P11_B10_elav_repo_NT	13.0953	speed
2	5	P11_B10_elav_repo_NT	13.1191	speed
3	5	P11_B10_elav_repo_NT	13.9794	speed
4	5	P11_B10_elav_repo_NT	13.4752	speed
5	5	P11_B10_elav_repo_NT	12.2261	speed
6	5	P11_B10_elav_repo_NT	11.367	speed
7	5	P11_B10_elav_repo_NT	10.4931	speed
8	5	P11_B10_elav_repo_NT	9.91915	speed
9	5	P11_B10_elav_repo_NT	9.82507	speed
10	5	P11_B10_elav_repo_NT	7.96249	speed
1	6	P11_B10_elav_repo_NT	13.2786	speed
2	6	P11_B10_elav_repo_NT	13.5891	speed
3	6	P11_B10_elav_repo_NT	13.0308	speed
4	6	P11_B10_elav_repo_NT	12.4417	speed
5	6	P11_B10_elav_repo_NT	12.3896	speed
6	6	P11_B10_elav_repo_NT	11.77	speed
7	6	P11_B10_elav_repo_NT	10.2164	speed
8	6	P11_B10_elav_repo_NT	8.67818	speed
9	6	P11_B10_elav_repo_NT	7.87995	speed
10	6	P11_B10_elav_repo_NT	7.49934	speed
1	1	P12_C12_elav_repo_NT	12.5455	speed
3	1	P12_C12_elav_repo_NT	12.9459	speed
4	1	P12_C12_elav_repo_NT	12.4429	speed
5	1	P12_C12_elav_repo_NT	11.6243	speed
6	1	P12_C12_elav_repo_NT	10.9246	speed
7	1	P12_C12_elav_repo_NT	10.6526	speed
8	1	P12_C12_elav_repo_NT	8.36438	speed
10	1	P12_C12_elav_repo_NT	8.59623	speed
1	2	P12_C12_elav_repo_NT	12.9279	speed
3	2	P12_C12_elav_repo_NT	12.6357	speed
4	2	P12_C12_elav_repo_NT	12.7774	speed
5	2	P12_C12_elav_repo_NT	12.3313	speed
6	2	P12_C12_elav_repo_NT	10.9638	speed
7	2	P12_C12_elav_repo_NT	11.131	speed
8	2	P12_C12_elav_repo_NT	8.01871	speed
10	2	P12_C12_elav_repo_NT	7.50476	speed
1	3	P12_C12_elav_repo_NT	12.8263	speed
2	3	P12_C12_elav_repo_NT	12.8104	speed
3	3	P12_C12_elav_repo_NT	13.104	speed
4	3	P12_C12_elav_repo_NT	11.7566	speed
5	3	P12_C12_elav_repo_NT	10.1868	speed
6	3	P12_C12_elav_repo_NT	7.46232	speed
7	3	P12_C12_elav_repo_NT	6.17335	speed
8	3	P12_C12_elav_repo_NT	4.87601	speed
9	3	P12_C12_elav_repo_NT	4.26992	speed
1	4	P12_C12_elav_repo_NT	12.2957	speed
2	4	P12_C12_elav_repo_NT	12.4019	speed
3	4	P12_C12_elav_repo_NT	12.8885	speed
4	4	P12_C12_elav_repo_NT	10.9943	speed
5	4	P12_C12_elav_repo_NT	10.143	speed
6	4	P12_C12_elav_repo_NT	8.59716	speed
7	4	P12_C12_elav_repo_NT	5.99257	speed
8	4	P12_C12_elav_repo_NT	5.69147	speed
9	4	P12_C12_elav_repo_NT	5.65079	speed
1	1	P13_F11_elav_repo_NT	12.0462	speed
2	1	P13_F11_elav_repo_NT	11.1711	speed
3	1	P13_F11_elav_repo_NT	12.961	speed
4	1	P13_F11_elav_repo_NT	11.886	speed
5	1	P13_F11_elav_repo_NT	12.16	speed
6	1	P13_F11_elav_repo_NT	10.5573	speed
7	1	P13_F11_elav_repo_NT	9.87117	speed
8	1	P13_F11_elav_repo_NT	9.02603	speed
9	1	P13_F11_elav_repo_NT	8.10056	speed
10	1	P13_F11_elav_repo_NT	7.60149	speed
1	2	P13_F11_elav_repo_NT	8.09826	speed
2	2	P13_F11_elav_repo_NT	12.9985	speed
3	2	P13_F11_elav_repo_NT	13.5282	speed
4	2	P13_F11_elav_repo_NT	11.8369	speed
5	2	P13_F11_elav_repo_NT	12.259	speed
6	2	P13_F11_elav_repo_NT	10.6812	speed
7	2	P13_F11_elav_repo_NT	9.91749	speed
8	2	P13_F11_elav_repo_NT	6.99261	speed
9	2	P13_F11_elav_repo_NT	9.28677	speed
10	2	P13_F11_elav_repo_NT	7.28927	speed
1	3	P13_F11_elav_repo_NT	10.8873	speed
2	3	P13_F11_elav_repo_NT	12.6022	speed
3	3	P13_F11_elav_repo_NT	13.5291	speed
4	3	P13_F11_elav_repo_NT	14.2005	speed
5	3	P13_F11_elav_repo_NT	12.8024	speed
6	3	P13_F11_elav_repo_NT	11.8269	speed
7	3	P13_F11_elav_repo_NT	10.0891	speed
8	3	P13_F11_elav_repo_NT	9.19903	speed
9	3	P13_F11_elav_repo_NT	8.60944	speed
10	3	P13_F11_elav_repo_NT	4.12939	speed
1	4	P13_F11_elav_repo_NT	12.4102	speed
2	4	P13_F11_elav_repo_NT	13.1291	speed
3	4	P13_F11_elav_repo_NT	13.8525	speed
4	4	P13_F11_elav_repo_NT	14.2173	speed
5	4	P13_F11_elav_repo_NT	13.0056	speed
6	4	P13_F11_elav_repo_NT	12.3936	speed
7	4	P13_F11_elav_repo_NT	11.5007	speed
8	4	P13_F11_elav_repo_NT	10.1248	speed
9	4	P13_F11_elav_repo_NT	10.9546	speed
10	4	P13_F11_elav_repo_NT	10.5742	speed
1	5	P13_F11_elav_repo_NT	12.127	speed
2	5	P13_F11_elav_repo_NT	12.3631	speed
3	5	P13_F11_elav_repo_NT	12.9578	speed
4	5	P13_F11_elav_repo_NT	12.7764	speed
5	5	P13_F11_elav_repo_NT	12.0748	speed
6	5	P13_F11_elav_repo_NT	11.0262	speed
7	5	P13_F11_elav_repo_NT	9.72789	speed
8	5	P13_F11_elav_repo_NT	8.02817	speed
9	5	P13_F11_elav_repo_NT	8.45909	speed
10	5	P13_F11_elav_repo_NT	7.20141	speed
1	1	P15_E3_elav_repo_NT	12.116	speed
2	1	P15_E3_elav_repo_NT	13.9574	speed
3	1	P15_E3_elav_repo_NT	13.5038	speed
4	1	P15_E3_elav_repo_NT	12.5788	speed
5	1	P15_E3_elav_repo_NT	11.838	speed
6	1	P15_E3_elav_repo_NT	10.0571	speed
7	1	P15_E3_elav_repo_NT	9.1492	speed
8	1	P15_E3_elav_repo_NT	9.21441	speed
9	1	P15_E3_elav_repo_NT	8.13742	speed
10	1	P15_E3_elav_repo_NT	8.37083	speed
1	2	P15_E3_elav_repo_NT	11.9729	speed
2	2	P15_E3_elav_repo_NT	12.0823	speed
3	2	P15_E3_elav_repo_NT	11.3084	speed
4	2	P15_E3_elav_repo_NT	12.0592	speed
5	2	P15_E3_elav_repo_NT	10.9386	speed
6	2	P15_E3_elav_repo_NT	9.86477	speed
7	2	P15_E3_elav_repo_NT	10.3446	speed
8	2	P15_E3_elav_repo_NT	9.63386	speed
9	2	P15_E3_elav_repo_NT	9.27059	speed
10	2	P15_E3_elav_repo_NT	10.3465	speed
1	3	P15_E3_elav_repo_NT	13.5363	speed
2	3	P15_E3_elav_repo_NT	13.1149	speed
3	3	P15_E3_elav_repo_NT	13.5393	speed
4	3	P15_E3_elav_repo_NT	12.9427	speed
5	3	P15_E3_elav_repo_NT	11.3969	speed
6	3	P15_E3_elav_repo_NT	9.23484	speed
7	3	P15_E3_elav_repo_NT	7.91683	speed
8	3	P15_E3_elav_repo_NT	7.49091	speed
9	3	P15_E3_elav_repo_NT	6.45309	speed
10	3	P15_E3_elav_repo_NT	7.19912	speed
1	4	P15_E3_elav_repo_NT	7.17745	speed
2	4	P15_E3_elav_repo_NT	13.2915	speed
3	4	P15_E3_elav_repo_NT	13.2181	speed
4	4	P15_E3_elav_repo_NT	12.715	speed
5	4	P15_E3_elav_repo_NT	11.2429	speed
6	4	P15_E3_elav_repo_NT	10.5706	speed
7	4	P15_E3_elav_repo_NT	8.66382	speed
8	4	P15_E3_elav_repo_NT	7.73533	speed
9	4	P15_E3_elav_repo_NT	7.9865	speed
10	4	P15_E3_elav_repo_NT	6.7109	speed
1	5	P15_E3_elav_repo_NT	13.6875	speed
2	5	P15_E3_elav_repo_NT	12.5364	speed
3	5	P15_E3_elav_repo_NT	13.2516	speed
4	5	P15_E3_elav_repo_NT	12.4975	speed
5	5	P15_E3_elav_repo_NT	10.6253	speed
6	5	P15_E3_elav_repo_NT	10.0526	speed
7	5	P15_E3_elav_repo_NT	6.82468	speed
8	5	P15_E3_elav_repo_NT	6.48418	speed
9	5	P15_E3_elav_repo_NT	6.82859	speed
10	5	P15_E3_elav_repo_NT	4.52018	speed
1	1	P5_B11_elav_repo_NT	11.2353	speed
3	1	P5_B11_elav_repo_NT	12.0392	speed
4	1	P5_B11_elav_repo_NT	12.0015	speed
5	1	P5_B11_elav_repo_NT	10.9803	speed
6	1	P5_B11_elav_repo_NT	9.92276	speed
7	1	P5_B11_elav_repo_NT	9.36246	speed
8	1	P5_B11_elav_repo_NT	7.59173	speed
10	1	P5_B11_elav_repo_NT	7.70826	speed
1	1	P6_C6_elav_repo_NT	12.5633	speed
3	1	P6_C6_elav_repo_NT	13.7984	speed
4	1	P6_C6_elav_repo_NT	12.2961	speed
5	1	P6_C6_elav_repo_NT	11.8085	speed
6	1	P6_C6_elav_repo_NT	10.6886	speed
7	1	P6_C6_elav_repo_NT	9.32844	speed
8	1	P6_C6_elav_repo_NT	8.45936	speed
10	1	P6_C6_elav_repo_NT	8.25725	speed
1	2	P6_C6_elav_repo_NT	13.369	speed
3	2	P6_C6_elav_repo_NT	13.5166	speed
4	2	P6_C6_elav_repo_NT	13.5861	speed
5	2	P6_C6_elav_repo_NT	11.707	speed
6	2	P6_C6_elav_repo_NT	10.8823	speed
7	2	P6_C6_elav_repo_NT	9.43984	speed
8	2	P6_C6_elav_repo_NT	7.38245	speed
10	2	P6_C6_elav_repo_NT	7.03054	speed
1	3	P6_C6_elav_repo_NT	13.1532	speed
3	3	P6_C6_elav_repo_NT	13.4748	speed
4	3	P6_C6_elav_repo_NT	12.5431	speed
5	3	P6_C6_elav_repo_NT	11.8128	speed
6	3	P6_C6_elav_repo_NT	10.1454	speed
7	3	P6_C6_elav_repo_NT	9.41559	speed
8	3	P6_C6_elav_repo_NT	8.06269	speed
10	3	P6_C6_elav_repo_NT	7.68983	speed
1	4	P6_C6_elav_repo_NT	12.7155	speed
3	4	P6_C6_elav_repo_NT	13.417	speed
4	4	P6_C6_elav_repo_NT	13.1653	speed
5	4	P6_C6_elav_repo_NT	11.3243	speed
6	4	P6_C6_elav_repo_NT	11.0307	speed
7	4	P6_C6_elav_repo_NT	5.04384	speed
8	4	P6_C6_elav_repo_NT	7.76737	speed
10	4	P6_C6_elav_repo_NT	7.54103	speed
1	5	P6_C6_elav_repo_NT	12.6338	speed
3	5	P6_C6_elav_repo_NT	12.8985	speed
4	5	P6_C6_elav_repo_NT	11.1438	speed
5	5	P6_C6_elav_repo_NT	9.62557	speed
6	5	P6_C6_elav_repo_NT	8.33587	speed
7	5	P6_C6_elav_repo_NT	8.39606	speed
8	5	P6_C6_elav_repo_NT	7.47609	speed
10	5	P6_C6_elav_repo_NT	7.00579	speed
1	1	siM13M1_elav_repo_NT	12.2787	speed
3	1	siM13M1_elav_repo_NT	12.5076	speed
4	1	siM13M1_elav_repo_NT	13.3406	speed
5	1	siM13M1_elav_repo_NT	11.9504	speed
6	1	siM13M1_elav_repo_NT	12.1908	speed
7	1	siM13M1_elav_repo_NT	11.7322	speed
8	1	siM13M1_elav_repo_NT	11.0121	speed
10	1	siM13M1_elav_repo_NT	10.4858	speed
1	2	siM13M1_elav_repo_NT	12.8793	speed
3	2	siM13M1_elav_repo_NT	12.1785	speed
4	2	siM13M1_elav_repo_NT	12.9675	speed
5	2	siM13M1_elav_repo_NT	12.7904	speed
6	2	siM13M1_elav_repo_NT	11.4946	speed
7	2	siM13M1_elav_repo_NT	11.4024	speed
8	2	siM13M1_elav_repo_NT	11.0566	speed
10	2	siM13M1_elav_repo_NT	9.0189	speed
1	3	siM13M1_elav_repo_NT	11.6274	speed
3	3	siM13M1_elav_repo_NT	12.3483	speed
4	3	siM13M1_elav_repo_NT	13.0902	speed
5	3	siM13M1_elav_repo_NT	12.8269	speed
6	3	siM13M1_elav_repo_NT	11.2849	speed
7	3	siM13M1_elav_repo_NT	13.0223	speed
8	3	siM13M1_elav_repo_NT	10.1266	speed
10	3	siM13M1_elav_repo_NT	11.8044	speed
1	4	siM13M1_elav_repo_NT	11.1179	speed
2	4	siM13M1_elav_repo_NT	12.7894	speed
3	4	siM13M1_elav_repo_NT	13.4608	speed
4	4	siM13M1_elav_repo_NT	12.3913	speed
5	4	siM13M1_elav_repo_NT	13.2623	speed
6	4	siM13M1_elav_repo_NT	13.4956	speed
7	4	siM13M1_elav_repo_NT	12.389	speed
8	4	siM13M1_elav_repo_NT	12.4599	speed
9	4	siM13M1_elav_repo_NT	12.5042	speed
10	4	siM13M1_elav_repo_NT	13.4031	speed
1	5	siM13M1_elav_repo_NT	11.3765	speed
2	5	siM13M1_elav_repo_NT	11.813	speed
3	5	siM13M1_elav_repo_NT	12.0146	speed
4	5	siM13M1_elav_repo_NT	12.9165	speed
5	5	siM13M1_elav_repo_NT	11.9848	speed
6	5	siM13M1_elav_repo_NT	12.6152	speed
7	5	siM13M1_elav_repo_NT	10.6879	speed
8	5	siM13M1_elav_repo_NT	11.2122	speed
9	5	siM13M1_elav_repo_NT	10.6103	speed
10	5	siM13M1_elav_repo_NT	11.5721	speed
1	6	siM13M1_elav_repo_NT	11.7362	speed
2	6	siM13M1_elav_repo_NT	12.598	speed
3	6	siM13M1_elav_repo_NT	13.1219	speed
4	6	siM13M1_elav_repo_NT	13.6539	speed
5	6	siM13M1_elav_repo_NT	12.8782	speed
6	6	siM13M1_elav_repo_NT	13.0176	speed
7	6	siM13M1_elav_repo_NT	11.3785	speed
8	6	siM13M1_elav_repo_NT	11.5155	speed
9	6	siM13M1_elav_repo_NT	11.1271	speed
10	6	siM13M1_elav_repo_NT	12.0924	speed
1	7	siM13M1_elav_repo_NT	12.1086	speed
3	7	siM13M1_elav_repo_NT	12.0175	speed
4	7	siM13M1_elav_repo_NT	12.9588	speed
5	7	siM13M1_elav_repo_NT	11.3736	speed
6	7	siM13M1_elav_repo_NT	10.959	speed
7	7	siM13M1_elav_repo_NT	10.2637	speed
8	7	siM13M1_elav_repo_NT	10.0301	speed
9	7	siM13M1_elav_repo_NT	9.64031	speed
10	7	siM13M1_elav_repo_NT	10.3136	speed
1	8	siM13M1_elav_repo_NT	12.646	speed
3	8	siM13M1_elav_repo_NT	12.5373	speed
4	8	siM13M1_elav_repo_NT	10.0204	speed
5	8	siM13M1_elav_repo_NT	11.54	speed
6	8	siM13M1_elav_repo_NT	12.3352	speed
7	8	siM13M1_elav_repo_NT	10.7669	speed
8	8	siM13M1_elav_repo_NT	8.88182	speed
9	8	siM13M1_elav_repo_NT	10.9916	speed
10	8	siM13M1_elav_repo_NT	11.3501	speed
1	9	siM13M1_elav_repo_NT	12.2459	speed
2	9	siM13M1_elav_repo_NT	12.3805	speed
3	9	siM13M1_elav_repo_NT	12.261	speed
4	9	siM13M1_elav_repo_NT	11.9516	speed
5	9	siM13M1_elav_repo_NT	11.0894	speed
6	9	siM13M1_elav_repo_NT	11.2352	speed
7	9	siM13M1_elav_repo_NT	10.0953	speed
8	9	siM13M1_elav_repo_NT	8.62021	speed
9	9	siM13M1_elav_repo_NT	9.99235	speed
1	10	siM13M1_elav_repo_NT	12.2693	speed
2	10	siM13M1_elav_repo_NT	11.4573	speed
3	10	siM13M1_elav_repo_NT	12.6423	speed
4	10	siM13M1_elav_repo_NT	12.3143	speed
5	10	siM13M1_elav_repo_NT	11.055	speed
6	10	siM13M1_elav_repo_NT	10.7495	speed
7	10	siM13M1_elav_repo_NT	10.4356	speed
8	10	siM13M1_elav_repo_NT	9.93952	speed
9	10	siM13M1_elav_repo_NT	12.0026	speed
1	11	siM13M1_elav_repo_NT	12.8241	speed
2	11	siM13M1_elav_repo_NT	13.0712	speed
3	11	siM13M1_elav_repo_NT	13.9854	speed
4	11	siM13M1_elav_repo_NT	12.847	speed
5	11	siM13M1_elav_repo_NT	12.4258	speed
6	11	siM13M1_elav_repo_NT	11.2505	speed
7	11	siM13M1_elav_repo_NT	10.5146	speed
8	11	siM13M1_elav_repo_NT	11.6061	speed
9	11	siM13M1_elav_repo_NT	12.4761	speed
1	1	v100636_elav_repo_NT	13.912	speed
2	1	v100636_elav_repo_NT	12.3996	speed
3	1	v100636_elav_repo_NT	15.6802	speed
4	1	v100636_elav_repo_NT	15.892	speed
5	1	v100636_elav_repo_NT	14.8056	speed
6	1	v100636_elav_repo_NT	13.0332	speed
7	1	v100636_elav_repo_NT	11.4058	speed
8	1	v100636_elav_repo_NT	10.3997	speed
9	1	v100636_elav_repo_NT	10.7068	speed
10	1	v100636_elav_repo_NT	10.0971	speed
1	2	v100636_elav_repo_NT	12.2685	speed
2	2	v100636_elav_repo_NT	12.2205	speed
3	2	v100636_elav_repo_NT	13.2415	speed
4	2	v100636_elav_repo_NT	14.0027	speed
5	2	v100636_elav_repo_NT	12.5129	speed
6	2	v100636_elav_repo_NT	12.223	speed
7	2	v100636_elav_repo_NT	11.2568	speed
8	2	v100636_elav_repo_NT	10.8644	speed
9	2	v100636_elav_repo_NT	10.194	speed
10	2	v100636_elav_repo_NT	4.8653	speed
1	3	V100636_elav_repo_NT	7.34797	speed
2	3	V100636_elav_repo_NT	13.0378	speed
3	3	V100636_elav_repo_NT	12.4771	speed
4	3	V100636_elav_repo_NT	11.5027	speed
5	3	V100636_elav_repo_NT	11.9489	speed
6	3	V100636_elav_repo_NT	11.226	speed
7	3	V100636_elav_repo_NT	10.083	speed
8	3	V100636_elav_repo_NT	9.92873	speed
9	3	V100636_elav_repo_NT	9.95162	speed
10	3	V100636_elav_repo_NT	9.51414	speed
1	4	v100636_elav_repo_NT	12.2278	speed
2	4	v100636_elav_repo_NT	12.8578	speed
3	4	v100636_elav_repo_NT	13.8086	speed
4	4	v100636_elav_repo_NT	13.3487	speed
5	4	v100636_elav_repo_NT	12.5661	speed
6	4	v100636_elav_repo_NT	12.4653	speed
7	4	v100636_elav_repo_NT	11.4924	speed
8	4	v100636_elav_repo_NT	10.3081	speed
9	4	v100636_elav_repo_NT	9.08776	speed
10	4	v100636_elav_repo_NT	9.11699	speed
1	5	v100636_elav_repo_NT	12.1447	speed
2	5	v100636_elav_repo_NT	13.4015	speed
3	5	v100636_elav_repo_NT	14.3172	speed
4	5	v100636_elav_repo_NT	14.0744	speed
5	5	v100636_elav_repo_NT	13.3606	speed
6	5	v100636_elav_repo_NT	13.4996	speed
7	5	v100636_elav_repo_NT	11.3803	speed
8	5	v100636_elav_repo_NT	10.1393	speed
9	5	v100636_elav_repo_NT	9.60012	speed
10	5	v100636_elav_repo_NT	9.4151	speed
1	6	v100636_elav_repo_NT	12.977	speed
2	6	v100636_elav_repo_NT	11.5073	speed
3	6	v100636_elav_repo_NT	12.5419	speed
4	6	v100636_elav_repo_NT	13.7439	speed
5	6	v100636_elav_repo_NT	11.2119	speed
6	6	v100636_elav_repo_NT	11.6773	speed
7	6	v100636_elav_repo_NT	9.25024	speed
8	6	v100636_elav_repo_NT	8.86804	speed
9	6	v100636_elav_repo_NT	7.79946	speed
10	6	v100636_elav_repo_NT	8.17481	speed
1	1	v102057_elav_repo_NT	12.9282	speed
3	1	v102057_elav_repo_NT	14.4286	speed
4	1	v102057_elav_repo_NT	13.8292	speed
5	1	v102057_elav_repo_NT	12.3474	speed
6	1	v102057_elav_repo_NT	10.7536	speed
7	1	v102057_elav_repo_NT	10.3772	speed
8	1	v102057_elav_repo_NT	9.66213	speed
10	1	v102057_elav_repo_NT	8.39241	speed
1	2	v102057_elav_repo_NT	13.9828	speed
3	2	v102057_elav_repo_NT	13.7858	speed
4	2	v102057_elav_repo_NT	10.9648	speed
5	2	v102057_elav_repo_NT	12.8883	speed
6	2	v102057_elav_repo_NT	11.7759	speed
7	2	v102057_elav_repo_NT	10.2415	speed
8	2	v102057_elav_repo_NT	9.19961	speed
10	2	v102057_elav_repo_NT	8.6642	speed
1	3	v102057_elav_repo_NT	13.8418	speed
3	3	v102057_elav_repo_NT	13.5203	speed
4	3	v102057_elav_repo_NT	12.6463	speed
5	3	v102057_elav_repo_NT	11.845	speed
6	3	v102057_elav_repo_NT	11.0637	speed
7	3	v102057_elav_repo_NT	10.6119	speed
8	3	v102057_elav_repo_NT	8.37895	speed
10	3	v102057_elav_repo_NT	7.63243	speed
1	4	v102057_elav_repo_NT	13.5925	speed
3	4	v102057_elav_repo_NT	14.2976	speed
4	4	v102057_elav_repo_NT	13.1807	speed
5	4	v102057_elav_repo_NT	11.3797	speed
6	4	v102057_elav_repo_NT	10.343	speed
7	4	v102057_elav_repo_NT	9.63224	speed
8	4	v102057_elav_repo_NT	8.95443	speed
10	4	v102057_elav_repo_NT	7.55508	speed
1	5	v102057_elav_repo_NT	13.4187	speed
3	5	v102057_elav_repo_NT	12.2564	speed
4	5	v102057_elav_repo_NT	13.0391	speed
5	5	v102057_elav_repo_NT	12.099	speed
6	5	v102057_elav_repo_NT	11.4897	speed
7	5	v102057_elav_repo_NT	10.5535	speed
8	5	v102057_elav_repo_NT	9.55383	speed
10	5	v102057_elav_repo_NT	8.796	speed
1	6	v102057_elav_repo_NT	12.4724	speed
2	6	v102057_elav_repo_NT	13.8079	speed
3	6	v102057_elav_repo_NT	12.8212	speed
4	6	v102057_elav_repo_NT	13.0335	speed
5	6	v102057_elav_repo_NT	12.0488	speed
6	6	v102057_elav_repo_NT	10.3724	speed
7	6	v102057_elav_repo_NT	9.96728	speed
8	6	v102057_elav_repo_NT	8.70097	speed
9	6	v102057_elav_repo_NT	7.63392	speed
10	6	v102057_elav_repo_NT	7.33546	speed
1	7	v102057_elav_repo_NT	12.7222	speed
2	7	v102057_elav_repo_NT	11.5801	speed
3	7	v102057_elav_repo_NT	12.4889	speed
4	7	v102057_elav_repo_NT	12.0872	speed
5	7	v102057_elav_repo_NT	11.5092	speed
6	7	v102057_elav_repo_NT	9.43492	speed
7	7	v102057_elav_repo_NT	7.37252	speed
8	7	v102057_elav_repo_NT	8.81729	speed
9	7	v102057_elav_repo_NT	7.12419	speed
10	7	v102057_elav_repo_NT	7.63546	speed
1	8	V102057_elav_repo_NT	12.9741	speed
2	8	V102057_elav_repo_NT	12.9136	speed
3	8	V102057_elav_repo_NT	12.3457	speed
4	8	V102057_elav_repo_NT	12.0021	speed
5	8	V102057_elav_repo_NT	10.1563	speed
6	8	V102057_elav_repo_NT	10.471	speed
7	8	V102057_elav_repo_NT	8.08931	speed
8	8	V102057_elav_repo_NT	8.01562	speed
9	8	V102057_elav_repo_NT	6.86718	speed
10	8	V102057_elav_repo_NT	6.29155	speed
1	9	V102057_elav_repo_NT	13.5589	speed
2	9	V102057_elav_repo_NT	13.1184	speed
3	9	V102057_elav_repo_NT	13.4438	speed
4	9	V102057_elav_repo_NT	13.0229	speed
5	9	V102057_elav_repo_NT	12.484	speed
6	9	V102057_elav_repo_NT	10.4059	speed
7	9	V102057_elav_repo_NT	8.26297	speed
8	9	V102057_elav_repo_NT	7.34987	speed
9	9	V102057_elav_repo_NT	5.69832	speed
10	9	V102057_elav_repo_NT	3.87432	speed
1	10	v102057_elav_repo_NT	12.7208	speed
2	10	v102057_elav_repo_NT	12.687	speed
3	10	v102057_elav_repo_NT	12.0967	speed
4	10	v102057_elav_repo_NT	12.9544	speed
5	10	v102057_elav_repo_NT	11.2225	speed
6	10	v102057_elav_repo_NT	10.1876	speed
7	10	v102057_elav_repo_NT	8.33755	speed
8	10	v102057_elav_repo_NT	6.65612	speed
9	10	v102057_elav_repo_NT	6.24363	speed
10	10	v102057_elav_repo_NT	4.99013	speed
1	11	v102057_elav_repo_NT	12.9811	speed
2	11	v102057_elav_repo_NT	12.9523	speed
3	11	v102057_elav_repo_NT	13.6319	speed
4	11	v102057_elav_repo_NT	12.3542	speed
5	11	v102057_elav_repo_NT	11.4766	speed
6	11	v102057_elav_repo_NT	10.0226	speed
7	11	v102057_elav_repo_NT	8.49006	speed
8	11	v102057_elav_repo_NT	8.32255	speed
9	11	v102057_elav_repo_NT	7.63239	speed
10	11	v102057_elav_repo_NT	5.23266	speed
1	1	v102622_elav_repo_NT	13.0628	speed
3	1	v102622_elav_repo_NT	12.7137	speed
4	1	v102622_elav_repo_NT	12.3579	speed
5	1	v102622_elav_repo_NT	9.80396	speed
6	1	v102622_elav_repo_NT	8.87489	speed
7	1	v102622_elav_repo_NT	7.93291	speed
8	1	v102622_elav_repo_NT	5.30451	speed
10	1	v102622_elav_repo_NT	5.50929	speed
1	2	v102622_elav_repo_NT	13.783	speed
3	2	v102622_elav_repo_NT	11.8702	speed
4	2	v102622_elav_repo_NT	13.186	speed
5	2	v102622_elav_repo_NT	11.395	speed
6	2	v102622_elav_repo_NT	10.1613	speed
7	2	v102622_elav_repo_NT	9.07307	speed
8	2	v102622_elav_repo_NT	6.01743	speed
10	2	v102622_elav_repo_NT	7.04841	speed
1	3	v102622_elav_repo_NT	12.9366	speed
3	3	v102622_elav_repo_NT	13.6852	speed
4	3	v102622_elav_repo_NT	13.2013	speed
5	3	v102622_elav_repo_NT	11.6162	speed
6	3	v102622_elav_repo_NT	10.1259	speed
7	3	v102622_elav_repo_NT	9.01279	speed
8	3	v102622_elav_repo_NT	7.83604	speed
10	3	v102622_elav_repo_NT	6.52343	speed
1	4	v102622_elav_repo_NT	14.9697	speed
2	4	v102622_elav_repo_NT	14.9123	speed
3	4	v102622_elav_repo_NT	15.0024	speed
4	4	v102622_elav_repo_NT	12.3693	speed
5	4	v102622_elav_repo_NT	12.4343	speed
6	4	v102622_elav_repo_NT	9.59329	speed
7	4	v102622_elav_repo_NT	8.96187	speed
8	4	v102622_elav_repo_NT	6.81296	speed
9	4	v102622_elav_repo_NT	7.44442	speed
1	5	v102622_elav_repo_NT	13.0327	speed
2	5	v102622_elav_repo_NT	13.4602	speed
3	5	v102622_elav_repo_NT	13.9651	speed
4	5	v102622_elav_repo_NT	12.5514	speed
5	5	v102622_elav_repo_NT	8.44096	speed
6	5	v102622_elav_repo_NT	10.6439	speed
7	5	v102622_elav_repo_NT	8.25207	speed
8	5	v102622_elav_repo_NT	6.54012	speed
9	5	v102622_elav_repo_NT	6.32131	speed
1	1	v13974_elav_repo_NT	13.4893	speed
2	1	v13974_elav_repo_NT	11.7209	speed
3	1	v13974_elav_repo_NT	13.0647	speed
4	1	v13974_elav_repo_NT	11.2553	speed
5	1	v13974_elav_repo_NT	10.5882	speed
6	1	v13974_elav_repo_NT	8.47771	speed
7	1	v13974_elav_repo_NT	5.13439	speed
8	1	v13974_elav_repo_NT	7.56117	speed
9	1	v13974_elav_repo_NT		speed
10	1	v13974_elav_repo_NT		speed
1	2	v13974_elav_repo_NT	9.33197	speed
1	3	v13974_elav_repo_NT	11.2318	speed
2	2	v13974_elav_repo_NT	8.73295	speed
2	3	v13974_elav_repo_NT	9.36737	speed
3	2	v13974_elav_repo_NT	8.23746	speed
3	3	v13974_elav_repo_NT	9.14091	speed
4	2	v13974_elav_repo_NT	7.81995	speed
4	3	v13974_elav_repo_NT	8.36639	speed
5	2	v13974_elav_repo_NT	6.70907	speed
5	3	v13974_elav_repo_NT	6.15803	speed
6	2	v13974_elav_repo_NT	5.89128	speed
6	3	v13974_elav_repo_NT	7.60652	speed
7	2	v13974_elav_repo_NT	3.89438	speed
7	3	v13974_elav_repo_NT	5.71921	speed
8	2	v13974_elav_repo_NT	3.92795	speed
8	3	v13974_elav_repo_NT	5.20582	speed
9	2	v13974_elav_repo_NT	4.81987	speed
9	3	v13974_elav_repo_NT	4.19088	speed
1	4	v13974_elav_repo_NT	12.6572	speed
2	4	v13974_elav_repo_NT	12.7542	speed
3	4	v13974_elav_repo_NT	12.1557	speed
4	4	v13974_elav_repo_NT	11.3481	speed
5	4	v13974_elav_repo_NT	10.6394	speed
6	4	v13974_elav_repo_NT	8.08123	speed
7	4	v13974_elav_repo_NT	6.96912	speed
8	4	v13974_elav_repo_NT	5.99274	speed
9	4	v13974_elav_repo_NT	6.60172	speed
1	1	v27699_elav_repo_NT	13.6596	speed
3	1	v27699_elav_repo_NT	13.7934	speed
4	1	v27699_elav_repo_NT	12.9731	speed
5	1	v27699_elav_repo_NT	10.5551	speed
6	1	v27699_elav_repo_NT	9.37258	speed
7	1	v27699_elav_repo_NT	8.80386	speed
8	1	v27699_elav_repo_NT	6.68497	speed
10	1	v27699_elav_repo_NT	6.06552	speed
1	2	v27699_elav_repo_NT	13.1515	speed
3	2	v27699_elav_repo_NT	13.6902	speed
4	2	v27699_elav_repo_NT	12.396	speed
5	2	v27699_elav_repo_NT	10.9118	speed
6	2	v27699_elav_repo_NT	9.18886	speed
7	2	v27699_elav_repo_NT	7.0607	speed
8	2	v27699_elav_repo_NT	4.8677	speed
10	2	v27699_elav_repo_NT	5.98547	speed
1	3	v27699_elav_repo_NT	12.9374	speed
3	3	v27699_elav_repo_NT	14.3288	speed
4	3	v27699_elav_repo_NT	12.4141	speed
5	3	v27699_elav_repo_NT	10.7234	speed
6	3	v27699_elav_repo_NT	9.99089	speed
7	3	v27699_elav_repo_NT	7.82961	speed
8	3	v27699_elav_repo_NT	5.53941	speed
10	3	v27699_elav_repo_NT	5.78808	speed
1	4	v27699_elav_repo_NT	14.0659	speed
3	4	v27699_elav_repo_NT	13.2193	speed
4	4	v27699_elav_repo_NT	12.7101	speed
5	4	v27699_elav_repo_NT	10.8382	speed
6	4	v27699_elav_repo_NT	9.61254	speed
7	4	v27699_elav_repo_NT	8.64696	speed
8	4	v27699_elav_repo_NT	7.8852	speed
10	4	v27699_elav_repo_NT	6.30148	speed
1	5	v27699_elav_repo_NT	12.6448	speed
3	5	v27699_elav_repo_NT	12.523	speed
4	5	v27699_elav_repo_NT	12.1569	speed
5	5	v27699_elav_repo_NT	10.0116	speed
6	5	v27699_elav_repo_NT	8.36531	speed
7	5	v27699_elav_repo_NT	8.00022	speed
8	5	v27699_elav_repo_NT	6.36754	speed
10	5	v27699_elav_repo_NT	5.99578	speed
1	1	v2897_elav_repo_NT	13.1053	speed
1	2	v2897_elav_repo_NT	11.8944	speed
1	3	v2897_elav_repo_NT	13.3997	speed
1	4	v2897_elav_repo_NT	11.9669	speed
1	5	v2897_elav_repo_NT	13.7203	speed
1	6	v2897_elav_repo_NT	11.6256	speed
3	1	v2897_elav_repo_NT	13.7628	speed
3	2	v2897_elav_repo_NT	13.2194	speed
3	3	v2897_elav_repo_NT	13.9296	speed
3	4	v2897_elav_repo_NT	12.7949	speed
3	5	v2897_elav_repo_NT	15.1548	speed
3	6	v2897_elav_repo_NT	13.1984	speed
4	1	v2897_elav_repo_NT	13.8344	speed
4	2	v2897_elav_repo_NT	13.2177	speed
4	3	v2897_elav_repo_NT	15.1712	speed
4	4	v2897_elav_repo_NT	13.6603	speed
4	5	v2897_elav_repo_NT	15.5697	speed
4	6	v2897_elav_repo_NT	14.313	speed
5	1	v2897_elav_repo_NT	12.7246	speed
5	2	v2897_elav_repo_NT	12.2015	speed
5	3	v2897_elav_repo_NT	13.2126	speed
5	4	v2897_elav_repo_NT	12.242	speed
5	5	v2897_elav_repo_NT	13.708	speed
5	6	v2897_elav_repo_NT	12.5944	speed
6	1	v2897_elav_repo_NT	10.992	speed
6	2	v2897_elav_repo_NT	10.8187	speed
6	3	v2897_elav_repo_NT	12.4701	speed
6	4	v2897_elav_repo_NT	11.2248	speed
6	5	v2897_elav_repo_NT	13.1407	speed
6	6	v2897_elav_repo_NT	11.3076	speed
7	1	v2897_elav_repo_NT		speed
7	2	v2897_elav_repo_NT	11.1112	speed
7	3	v2897_elav_repo_NT	11.4884	speed
7	4	v2897_elav_repo_NT	10.8146	speed
7	5	v2897_elav_repo_NT	12.5365	speed
7	6	v2897_elav_repo_NT	11.2432	speed
8	1	v2897_elav_repo_NT		speed
8	2	v2897_elav_repo_NT	9.06348	speed
8	3	v2897_elav_repo_NT	9.9808	speed
8	4	v2897_elav_repo_NT	9.87731	speed
8	5	v2897_elav_repo_NT	10.391	speed
8	6	v2897_elav_repo_NT	8.95409	speed
10	1	v2897_elav_repo_NT		speed
10	2	v2897_elav_repo_NT	8.6463	speed
10	3	v2897_elav_repo_NT	8.32949	speed
10	4	v2897_elav_repo_NT	8.68134	speed
10	5	v2897_elav_repo_NT	8.67934	speed
10	6	v2897_elav_repo_NT	8.64374	speed
1	1	v330130_elav_repo_NT	11.9238	speed
2	1	v330130_elav_repo_NT	12.437	speed
3	1	v330130_elav_repo_NT	12.7772	speed
4	1	v330130_elav_repo_NT	12.8797	speed
5	1	v330130_elav_repo_NT	12.1447	speed
6	1	v330130_elav_repo_NT	12.0533	speed
7	1	v330130_elav_repo_NT	9.85066	speed
8	1	v330130_elav_repo_NT	9.1587	speed
9	1	v330130_elav_repo_NT	8.22803	speed
10	1	v330130_elav_repo_NT	7.95441	speed
1	2	v330130_elav_repo_NT	12.5306	speed
2	2	v330130_elav_repo_NT	12.4622	speed
3	2	v330130_elav_repo_NT	14.2406	speed
4	2	v330130_elav_repo_NT	13.7819	speed
5	2	v330130_elav_repo_NT	13.4759	speed
6	2	v330130_elav_repo_NT	12.1293	speed
7	2	v330130_elav_repo_NT	10.7288	speed
8	2	v330130_elav_repo_NT	9.36614	speed
9	2	v330130_elav_repo_NT	8.79709	speed
10	2	v330130_elav_repo_NT	9.07174	speed
1	3	v330130_elav_repo_NT	13.2815	speed
2	3	v330130_elav_repo_NT	11.9917	speed
3	3	v330130_elav_repo_NT	12.1046	speed
4	3	v330130_elav_repo_NT	12.4587	speed
5	3	v330130_elav_repo_NT	11.1223	speed
6	3	v330130_elav_repo_NT	11.7614	speed
7	3	v330130_elav_repo_NT	9.35613	speed
8	3	v330130_elav_repo_NT	8.0893	speed
9	3	v330130_elav_repo_NT	8.21445	speed
10	3	v330130_elav_repo_NT	7.91474	speed
1	4	v330130_elav_repo_NT	13.2375	speed
2	4	v330130_elav_repo_NT	13.3494	speed
3	4	v330130_elav_repo_NT	12.9604	speed
4	4	v330130_elav_repo_NT	12.4292	speed
5	4	v330130_elav_repo_NT	12.8983	speed
6	4	v330130_elav_repo_NT	13.0151	speed
7	4	v330130_elav_repo_NT	10.2539	speed
8	4	v330130_elav_repo_NT	9.13304	speed
9	4	v330130_elav_repo_NT	9.74296	speed
10	4	v330130_elav_repo_NT	8.61717	speed
1	5	v330130_elav_repo_NT	12.7974	speed
2	5	v330130_elav_repo_NT	13.2956	speed
3	5	v330130_elav_repo_NT	14.1768	speed
4	5	v330130_elav_repo_NT	13.3211	speed
5	5	v330130_elav_repo_NT	13.1108	speed
6	5	v330130_elav_repo_NT	13.1415	speed
7	5	v330130_elav_repo_NT	6.29604	speed
8	5	v330130_elav_repo_NT	8.7993	speed
9	5	v330130_elav_repo_NT	7.0945	speed
10	5	v330130_elav_repo_NT	7.37856	speed
1	1	v330714_elav_repo_NT	13.2345	speed
3	1	v330714_elav_repo_NT	14.7259	speed
4	1	v330714_elav_repo_NT	13.8208	speed
5	1	v330714_elav_repo_NT	13.5416	speed
6	1	v330714_elav_repo_NT	11.9509	speed
7	1	v330714_elav_repo_NT	10.8162	speed
8	1	v330714_elav_repo_NT	9.23664	speed
10	1	v330714_elav_repo_NT	7.18136	speed
1	2	v330714_elav_repo_NT	12.0856	speed
3	2	v330714_elav_repo_NT	15.6445	speed
4	2	v330714_elav_repo_NT	16.4094	speed
5	2	v330714_elav_repo_NT	14.7818	speed
6	2	v330714_elav_repo_NT	13.6566	speed
7	2	v330714_elav_repo_NT	12.7027	speed
8	2	v330714_elav_repo_NT	8.78578	speed
10	2	v330714_elav_repo_NT	9.56824	speed
1	3	v330714_elav_repo_NT	12.8063	speed
3	3	v330714_elav_repo_NT	9.46623	speed
4	3	v330714_elav_repo_NT	11.5052	speed
5	3	v330714_elav_repo_NT	14.162	speed
6	3	v330714_elav_repo_NT	13.3383	speed
7	3	v330714_elav_repo_NT	12.0177	speed
8	3	v330714_elav_repo_NT	10.2357	speed
10	3	v330714_elav_repo_NT	8.67599	speed
1	4	v330714_elav_repo_NT	13.8342	speed
3	4	v330714_elav_repo_NT	14.3404	speed
4	4	v330714_elav_repo_NT	15.5513	speed
5	4	v330714_elav_repo_NT	13.4994	speed
6	4	v330714_elav_repo_NT	11.2195	speed
7	4	v330714_elav_repo_NT	12.0672	speed
8	4	v330714_elav_repo_NT	10.7	speed
10	4	v330714_elav_repo_NT	9.19817	speed
1	5	v330714_elav_repo_NT	13.3352	speed
3	5	v330714_elav_repo_NT	14.4611	speed
4	5	v330714_elav_repo_NT	16.18	speed
5	5	v330714_elav_repo_NT	13.6835	speed
6	5	v330714_elav_repo_NT	13.2982	speed
7	5	v330714_elav_repo_NT	11.5352	speed
8	5	v330714_elav_repo_NT	8.92768	speed
10	5	v330714_elav_repo_NT	9.76198	speed
1	1	v35901_elav_repo_NT	13.8672	speed
3	1	v35901_elav_repo_NT	14.0822	speed
4	1	v35901_elav_repo_NT	13.2503	speed
5	1	v35901_elav_repo_NT	11.8585	speed
6	1	v35901_elav_repo_NT	10.3662	speed
7	1	v35901_elav_repo_NT	10.6596	speed
8	1	v35901_elav_repo_NT	8.6688	speed
10	1	v35901_elav_repo_NT	7.53171	speed
1	2	v35901_elav_repo_NT	13.8644	speed
3	2	v35901_elav_repo_NT	14.7208	speed
4	2	v35901_elav_repo_NT	13.5822	speed
5	2	v35901_elav_repo_NT	11.3886	speed
6	2	v35901_elav_repo_NT	10.4687	speed
7	2	v35901_elav_repo_NT	8.94685	speed
8	2	v35901_elav_repo_NT	8.42123	speed
10	2	v35901_elav_repo_NT	7.90303	speed
1	3	v35901_elav_repo_NT	13.962	speed
3	3	v35901_elav_repo_NT	15.0049	speed
4	3	v35901_elav_repo_NT	13.8243	speed
5	3	v35901_elav_repo_NT	12.6774	speed
6	3	v35901_elav_repo_NT	11.4565	speed
7	3	v35901_elav_repo_NT	12.0538	speed
8	3	v35901_elav_repo_NT	10.3691	speed
10	3	v35901_elav_repo_NT	8.71389	speed
1	4	v35901_elav_repo_NT	13.0383	speed
3	4	v35901_elav_repo_NT	14.1487	speed
4	4	v35901_elav_repo_NT	13.6392	speed
5	4	v35901_elav_repo_NT	11.1182	speed
6	4	v35901_elav_repo_NT	9.75969	speed
7	4	v35901_elav_repo_NT	10.1219	speed
8	4	v35901_elav_repo_NT	8.0223	speed
10	4	v35901_elav_repo_NT	7.59709	speed
1	5	v35901_elav_repo_NT	12.4024	speed
3	5	v35901_elav_repo_NT	14.706	speed
4	5	v35901_elav_repo_NT	13.2523	speed
5	5	v35901_elav_repo_NT	11.4532	speed
6	5	v35901_elav_repo_NT	9.58056	speed
7	5	v35901_elav_repo_NT	7.41288	speed
8	5	v35901_elav_repo_NT	7.50539	speed
10	5	v35901_elav_repo_NT	5.77532	speed
1	6	v35901_elav_repo_NT	14.309	speed
2	6	v35901_elav_repo_NT	13.3436	speed
3	6	v35901_elav_repo_NT	13.6552	speed
4	6	v35901_elav_repo_NT	12.9009	speed
5	6	v35901_elav_repo_NT	12.4882	speed
6	6	v35901_elav_repo_NT	12.064	speed
7	6	v35901_elav_repo_NT	9.85467	speed
8	6	v35901_elav_repo_NT	8.97467	speed
9	6	v35901_elav_repo_NT	9.05744	speed
10	6	v35901_elav_repo_NT	4.67842	speed
1	7	v35901_elav_repo_NT	14.7305	speed
2	7	v35901_elav_repo_NT	15.074	speed
3	7	v35901_elav_repo_NT	14.3307	speed
4	7	v35901_elav_repo_NT	13.2506	speed
5	7	v35901_elav_repo_NT	12.6273	speed
6	7	v35901_elav_repo_NT	10.1593	speed
7	7	v35901_elav_repo_NT	9.1609	speed
8	7	v35901_elav_repo_NT	8.50905	speed
9	7	v35901_elav_repo_NT	9.97642	speed
1	1	v46993_elav_repo_NT	13.4001	speed
2	1	v46993_elav_repo_NT	13.591	speed
3	1	v46993_elav_repo_NT	13.0374	speed
4	1	v46993_elav_repo_NT	12.3873	speed
5	1	v46993_elav_repo_NT	12.0789	speed
6	1	v46993_elav_repo_NT	10.3562	speed
7	1	v46993_elav_repo_NT	8.04019	speed
8	1	v46993_elav_repo_NT	8.2703	speed
9	1	v46993_elav_repo_NT	6.87897	speed
10	1	v46993_elav_repo_NT	6.85101	speed
1	2	v46993_elav_repo_NT	12.9234	speed
2	2	v46993_elav_repo_NT	13.5811	speed
3	2	v46993_elav_repo_NT	14.0469	speed
4	2	v46993_elav_repo_NT	13.1872	speed
5	2	v46993_elav_repo_NT	12.1961	speed
6	2	v46993_elav_repo_NT	11.8133	speed
7	2	v46993_elav_repo_NT		speed
8	2	v46993_elav_repo_NT		speed
9	2	v46993_elav_repo_NT		speed
10	2	v46993_elav_repo_NT	2.16038	speed
1	3	v46993_elav_repo_NT	13.9788	speed
2	3	v46993_elav_repo_NT	12.9978	speed
3	3	v46993_elav_repo_NT	13.341	speed
4	3	v46993_elav_repo_NT	14.0838	speed
5	3	v46993_elav_repo_NT	12.4659	speed
6	3	v46993_elav_repo_NT	11.9375	speed
7	3	v46993_elav_repo_NT	10.3935	speed
8	3	v46993_elav_repo_NT	9.69431	speed
9	3	v46993_elav_repo_NT	8.41863	speed
10	3	v46993_elav_repo_NT	7.72458	speed
1	4	v46993_elav_repo_NT	13.6647	speed
2	4	v46993_elav_repo_NT	14.0522	speed
3	4	v46993_elav_repo_NT	13.7001	speed
4	4	v46993_elav_repo_NT	12.5935	speed
5	4	v46993_elav_repo_NT	11.7766	speed
6	4	v46993_elav_repo_NT	11.0896	speed
7	4	v46993_elav_repo_NT	11.2585	speed
8	4	v46993_elav_repo_NT	10.2205	speed
9	4	v46993_elav_repo_NT	9.99648	speed
1	5	v46993_elav_repo_NT	13.2226	speed
2	5	v46993_elav_repo_NT	14.1127	speed
3	5	v46993_elav_repo_NT	13.5005	speed
4	5	v46993_elav_repo_NT	11.8552	speed
5	5	v46993_elav_repo_NT	10.6167	speed
6	5	v46993_elav_repo_NT	9.9851	speed
7	5	v46993_elav_repo_NT	8.55805	speed
8	5	v46993_elav_repo_NT	7.79001	speed
9	5	v46993_elav_repo_NT	7.42402	speed
1	1	v9138_elav_repo_NT	12.055	speed
3	1	v9138_elav_repo_NT	12.9279	speed
4	1	v9138_elav_repo_NT	12.6116	speed
5	1	v9138_elav_repo_NT	11.5547	speed
6	1	v9138_elav_repo_NT	9.80729	speed
7	1	v9138_elav_repo_NT	9.55974	speed
8	1	v9138_elav_repo_NT	8.26374	speed
10	1	v9138_elav_repo_NT	6.74433	speed
1	2	v9138_elav_repo_NT	12.5068	speed
3	2	v9138_elav_repo_NT	12.7137	speed
4	2	v9138_elav_repo_NT	12.9224	speed
5	2	v9138_elav_repo_NT	11.6979	speed
6	2	v9138_elav_repo_NT	10.6926	speed
7	2	v9138_elav_repo_NT	9.5747	speed
8	2	v9138_elav_repo_NT	6.90799	speed
10	2	v9138_elav_repo_NT	5.79122	speed
1	3	v9138_elav_repo_NT	11.1655	speed
3	3	v9138_elav_repo_NT	13.057	speed
4	3	v9138_elav_repo_NT	11.1595	speed
5	3	v9138_elav_repo_NT	10.6833	speed
6	3	v9138_elav_repo_NT	10.5067	speed
7	3	v9138_elav_repo_NT	9.15015	speed
8	3	v9138_elav_repo_NT	7.58788	speed
10	3	v9138_elav_repo_NT	6.75175	speed
1	4	v9138_elav_repo_NT	11.6825	speed
3	4	v9138_elav_repo_NT	13.138	speed
4	4	v9138_elav_repo_NT	12.5788	speed
5	4	v9138_elav_repo_NT	11.3026	speed
6	4	v9138_elav_repo_NT	10.2599	speed
7	4	v9138_elav_repo_NT	8.54797	speed
8	4	v9138_elav_repo_NT	7.20354	speed
10	4	v9138_elav_repo_NT	6.77482	speed
1	5	v9138_elav_repo_NT	12.3516	speed
3	5	v9138_elav_repo_NT	10.9538	speed
4	5	v9138_elav_repo_NT	11.7266	speed
5	5	v9138_elav_repo_NT	9.75881	speed
6	5	v9138_elav_repo_NT	8.79091	speed
7	5	v9138_elav_repo_NT	7.88693	speed
8	5	v9138_elav_repo_NT	7.67301	speed
10	5	v9138_elav_repo_NT	6.07543	speed
1	1	v977_elav_repo_NT	13.4816	speed
2	1	v977_elav_repo_NT	14.2284	speed
3	1	v977_elav_repo_NT	14.3677	speed
4	1	v977_elav_repo_NT	13.3174	speed
5	1	v977_elav_repo_NT	12.5788	speed
6	1	v977_elav_repo_NT	10.8873	speed
7	1	v977_elav_repo_NT	9.43606	speed
8	1	v977_elav_repo_NT	8.69836	speed
9	1	v977_elav_repo_NT	7.21685	speed
10	1	v977_elav_repo_NT	8.46702	speed
1	2	v977_elav_repo_NT	9.90423	speed
2	2	v977_elav_repo_NT	13.898	speed
3	2	v977_elav_repo_NT	14.8662	speed
4	2	v977_elav_repo_NT	13.2044	speed
5	2	v977_elav_repo_NT	13.3424	speed
6	2	v977_elav_repo_NT	11.66	speed
7	2	v977_elav_repo_NT	8.84657	speed
8	2	v977_elav_repo_NT	8.59174	speed
9	2	v977_elav_repo_NT	7.08012	speed
10	2	v977_elav_repo_NT	4.21054	speed
1	3	v977_elav_repo_NT	9.84126	speed
2	3	v977_elav_repo_NT	13.2999	speed
3	3	v977_elav_repo_NT	14.4196	speed
4	3	v977_elav_repo_NT	14.2544	speed
5	3	v977_elav_repo_NT	12.1634	speed
6	3	v977_elav_repo_NT	9.95592	speed
7	3	v977_elav_repo_NT	8.48851	speed
8	3	v977_elav_repo_NT	6.33197	speed
9	3	v977_elav_repo_NT	6.47492	speed
10	3	v977_elav_repo_NT	4.96286	speed
1	4	v977_elav_repo_NT	11.8236	speed
2	4	v977_elav_repo_NT	15.1735	speed
3	4	v977_elav_repo_NT	14.185	speed
4	4	v977_elav_repo_NT	12.7531	speed
5	4	v977_elav_repo_NT	12.6829	speed
6	4	v977_elav_repo_NT	10.9148	speed
7	4	v977_elav_repo_NT	10.3669	speed
8	4	v977_elav_repo_NT	8.83834	speed
9	4	v977_elav_repo_NT	7.86328	speed
10	4	v977_elav_repo_NT	5.55424	speed
[truncated: 20 more rows]
