# Supplementary material for: Downregulation of glial genes involved in synaptic function mitigates Huntington's disease pathogenesis
Source: eLife. 2021 Apr 19;10:e64564. doi: 10.7554/eLife.64564 (PMC8149125; doi:10.7554/eLife.64564)
Supplement: Figure 6—figure supplement 1—source data 1. [file elife-64564-fig6-figsupp1-data1.xlsx]

## Sheet: Sheet1
	GFP	LaminC	Ratio	Normalized to negative control
Negative control replicate 1	24.8	405	0.0612346	0.000277786
Non-targeting hpRNA (VDRC 13974) replicate 1	102000	400	255	1.15679
Spn42De hpRNA (VDRC 102622) replicate 1	122000	299	408.027	1.85098
Negative control replicate 2	-10.8	436	-0.0247706	-0.00011237
Non-targeting hpRNA (VDRC 13974) replicate 2	96300	417	230.935	1.04762
Spn42De hpRNA (VDRC 102622) replicate 2	124000	277	447.653	2.03074
Negative control replicate 3	123	460	0.267391	0.001213
Non-targeting hpRNA (VDRC 13974) replicate 3	104000	593	175.379	0.795594
Spn42De hpRNA (VDRC 102622) replicate 3	110000	418	263.158	1.19379
	Average	SEM
Negative control replicate 1	0.000459471	0.000393238
Non-targeting hpRNA (VDRC 13974) replicate 1	1	0.106951
Spn42De hpRNA (VDRC 102622) replicate 1	1.69184	0.254372
