# Supplementary material for: Downregulation of glial genes involved in synaptic function mitigates Huntington's disease pathogenesis
Source: eLife. 2021 Apr 19;10:e64564. doi: 10.7554/eLife.64564 (PMC8149125; doi:10.7554/eLife.64564)
Supplement: Figure 6—figure supplement 2—source data 1. [file elife-64564-fig6-figsupp2-data1.xlsx]

## Sheet: Sheet1
Sample	Slide	Condition	Area	Mean	Min	max			Average	SE
942	1	zQ175	7045.55	73.671	8	225		zQ175	73.2739	3.24918
942	2	zQ175	7045.55	74.433	6	225		WT	59.7521	1.83619
942	3	zQ175	7045.55	94.416	8	225
943	1	zQ175	7045.92	69.385	8	225			Average	SE
943	2	zQ175	7045.92	82.762	6	225		942	80.84	6.79156
943	3	zQ175	7045.92	67.473	8	225		943	79.4113	7.64255
944	1	zQ175	6903.61	64.37	4	225		944	82.1877	7.23153
944	2	zQ175	6903.61	65.713	8	225		945	73.2067	4.80944
944	3	zQ175	6903.61	67.242	8	225		955	71.535	5.68452
945	1	WT	7045.55	55.281	0	225		958	65.852	0.898451
945	2	WT	7045.55	61.94	0	255		959	65.775	0.829654
945	3	WT	7045.55	44.275	0	225
955	1	WT	7049.9	58.784	0	255
955	2	WT	7049.77	65.468	2	225		t-Test: Two-Sample Assuming Unequal Variances
955	3	WT	7049.77	66.994	0	225
958	1	WT	7045.8	63.766	0	225			Variable 1	Variable 2
958	2	WT	7045.8	65.006	2	225		Mean	73.2739	59.7521
958	3	WT	7045.8	60.184	2	225		Variance	95.0148	40.4589
959	1	WT	7045.8	53.016	0	225		Observations	9	12
959	2	WT	7045.8	60.301	0	225		Hypothesized Mean Difference	0
959	3	WT	7045.8	62.01	0	225		df	13
								t Stat	3.62308
								P(T<=t) one-tail	0.00154616
								t Critical one-tail	1.77093
								P(T<=t) two-tail	0.00309233
								t Critical two-tail	2.16037
