# Supplementary material for: Downregulation of glial genes involved in synaptic function mitigates Huntington's disease pathogenesis
Source: eLife. 2021 Apr 19;10:e64564. doi: 10.7554/eLife.64564 (PMC8149125; doi:10.7554/eLife.64564)
Supplement: Figure 6—source data 1. [file elife-64564-fig6-data1.xlsx]

## Sheet: For Statistical Analysis
Trialday	Replicate	Genotype	Observation	Metric
1	1	siHTT_mHTT	10.9555	xspeed
1	2	siHTT_mHTT	11.7727	xspeed
1	3	siHTT_mHTT	10.6889	xspeed
3	1	siHTT_mHTT	11.5198	xspeed
3	2	siHTT_mHTT	11.4672	xspeed
3	3	siHTT_mHTT	11.3099	xspeed
4	1	siHTT_mHTT	12.3128	xspeed
4	2	siHTT_mHTT	12.0977	xspeed
4	3	siHTT_mHTT	12.1273	xspeed
5	1	siHTT_mHTT	10.9537	xspeed
5	2	siHTT_mHTT	11.8217	xspeed
5	3	siHTT_mHTT	11.7	xspeed
6	1	siHTT_mHTT	11.3522	xspeed
6	2	siHTT_mHTT	10.7766	xspeed
6	3	siHTT_mHTT	10.2472	xspeed
7	1	siHTT_mHTT	10.8988	xspeed
7	2	siHTT_mHTT	10.5966	xspeed
7	3	siHTT_mHTT	12.3022	xspeed
8	1	siHTT_mHTT	10.2308	xspeed
8	2	siHTT_mHTT	10.2127	xspeed
8	3	siHTT_mHTT	9.43317	xspeed
9	1	siHTT_mHTT	9.84065	xspeed
9	2	siHTT_mHTT	8.15186	xspeed
9	3	siHTT_mHTT	10.9168	xspeed
10	1	siHTT_mHTT	9.38683	xspeed
10	2	siHTT_mHTT	9.54397	xspeed
10	3	siHTT_mHTT	10.6105	xspeed
1	7	siHTT_mHTT	10.9437	xspeed
1	8	siHTT_mHTT	11.5128	xspeed
3	7	siHTT_mHTT	11.0627	xspeed
3	8	siHTT_mHTT	11.8475	xspeed
4	7	siHTT_mHTT	12.02	xspeed
4	8	siHTT_mHTT	9.4847	xspeed
5	7	siHTT_mHTT	10.7313	xspeed
5	8	siHTT_mHTT	10.5503	xspeed
6	7	siHTT_mHTT	10.0975	xspeed
6	8	siHTT_mHTT	11.303	xspeed
7	7	siHTT_mHTT	9.66719	xspeed
7	8	siHTT_mHTT	10.0757	xspeed
8	7	siHTT_mHTT	9.38433	xspeed
8	8	siHTT_mHTT	8.3048	xspeed
9	7	siHTT_mHTT	9.08337	xspeed
9	8	siHTT_mHTT	10.2399	xspeed
10	7	siHTT_mHTT	9.60759	xspeed
10	8	siHTT_mHTT	10.5531	xspeed
1	4	siHTT_mHTT	9.56427	xspeed
1	5	siHTT_mHTT	10.2436	xspeed
1	6	siHTT_mHTT	10.274	xspeed
2	4	siHTT_mHTT	11.6811	xspeed
2	5	siHTT_mHTT	10.9111	xspeed
2	6	siHTT_mHTT	11.6242	xspeed
3	4	siHTT_mHTT	12.1237	xspeed
3	5	siHTT_mHTT	11.243	xspeed
3	6	siHTT_mHTT	11.6805	xspeed
4	4	siHTT_mHTT	11.0372	xspeed
4	5	siHTT_mHTT	11.7771	xspeed
4	6	siHTT_mHTT	12.4067	xspeed
5	4	siHTT_mHTT	12.3102	xspeed
5	5	siHTT_mHTT	11.0886	xspeed
5	6	siHTT_mHTT	11.7316	xspeed
6	4	siHTT_mHTT	12.0648	xspeed
6	5	siHTT_mHTT	11.5902	xspeed
6	6	siHTT_mHTT	11.5653	xspeed
7	4	siHTT_mHTT	11.1076	xspeed
7	5	siHTT_mHTT	9.90142	xspeed
7	6	siHTT_mHTT	10.4357	xspeed
8	4	siHTT_mHTT	10.9418	xspeed
8	5	siHTT_mHTT	9.98894	xspeed
8	6	siHTT_mHTT	10.2243	xspeed
9	4	siHTT_mHTT	11.2253	xspeed
9	5	siHTT_mHTT	9.79393	xspeed
9	6	siHTT_mHTT	10.3272	xspeed
10	4	siHTT_mHTT	12.0171	xspeed
10	5	siHTT_mHTT	10.3921	xspeed
10	6	siHTT_mHTT	10.7308	xspeed
1	9	siHTT_mHTT	11.2273	xspeed
2	9	siHTT_mHTT	11.2629	xspeed
3	9	siHTT_mHTT	10.7848	xspeed
4	9	siHTT_mHTT	11.1129	xspeed
5	9	siHTT_mHTT	10.0447	xspeed
6	9	siHTT_mHTT	10.3562	xspeed
7	9	siHTT_mHTT	9.38125	xspeed
8	9	siHTT_mHTT	7.89157	xspeed
9	9	siHTT_mHTT	9.17161	xspeed
1	10	siHTT_mHTT	11.5774	xspeed
1	11	siHTT_mHTT	11.8025	xspeed
2	10	siHTT_mHTT	10.4931	xspeed
2	11	siHTT_mHTT	11.6783	xspeed
3	10	siHTT_mHTT	11.7514	xspeed
3	11	siHTT_mHTT	12.4828	xspeed
4	10	siHTT_mHTT	11.5517	xspeed
4	11	siHTT_mHTT	11.771	xspeed
5	10	siHTT_mHTT	10.4384	xspeed
5	11	siHTT_mHTT	11.4729	xspeed
6	10	siHTT_mHTT	10.0624	xspeed
6	11	siHTT_mHTT	10.3594	xspeed
7	10	siHTT_mHTT	9.95139	xspeed
7	11	siHTT_mHTT	9.78228	xspeed
8	10	siHTT_mHTT	9.44615	xspeed
8	11	siHTT_mHTT	10.8085	xspeed
9	10	siHTT_mHTT	11.3152	xspeed
9	11	siHTT_mHTT	11.6761	xspeed
1	1	nontargeting_mHTT	12.3253	xspeed
2	1	nontargeting_mHTT	10.865	xspeed
3	1	nontargeting_mHTT	12.1238	xspeed
4	1	nontargeting_mHTT	10.4807	xspeed
5	1	nontargeting_mHTT	10.0628	xspeed
6	1	nontargeting_mHTT	8.01556	xspeed
7	1	nontargeting_mHTT	4.45053	xspeed
8	1	nontargeting_mHTT	6.96406	xspeed
9	1	nontargeting_mHTT		xspeed
10	1	nontargeting_mHTT		xspeed
1	2	nontargeting_mHTT	8.66855	xspeed
1	3	nontargeting_mHTT	10.2851	xspeed
2	2	nontargeting_mHTT	8.03018	xspeed
2	3	nontargeting_mHTT	8.72147	xspeed
3	2	nontargeting_mHTT	7.43326	xspeed
3	3	nontargeting_mHTT	8.12467	xspeed
4	2	nontargeting_mHTT	7.20629	xspeed
4	3	nontargeting_mHTT	7.63833	xspeed
5	2	nontargeting_mHTT	6.14408	xspeed
5	3	nontargeting_mHTT	5.59717	xspeed
6	2	nontargeting_mHTT	5.32902	xspeed
6	3	nontargeting_mHTT	7.13955	xspeed
7	2	nontargeting_mHTT	3.19358	xspeed
7	3	nontargeting_mHTT	5.18755	xspeed
8	2	nontargeting_mHTT	3.19895	xspeed
8	3	nontargeting_mHTT	4.60198	xspeed
9	2	nontargeting_mHTT	4.38133	xspeed
9	3	nontargeting_mHTT	3.53302	xspeed
1	4	nontargeting_mHTT	11.9775	xspeed
2	4	nontargeting_mHTT	11.7945	xspeed
3	4	nontargeting_mHTT	11.1667	xspeed
4	4	nontargeting_mHTT	10.5911	xspeed
5	4	nontargeting_mHTT	10.0811	xspeed
6	4	nontargeting_mHTT	7.34489	xspeed
7	4	nontargeting_mHTT	6.44471	xspeed
8	4	nontargeting_mHTT	5.44293	xspeed
9	4	nontargeting_mHTT	6.18272	xspeed
1	1	siHTT_mHTT	12.2787	speed
1	2	siHTT_mHTT	12.8793	speed
1	3	siHTT_mHTT	11.6274	speed
3	1	siHTT_mHTT	12.5076	speed
3	2	siHTT_mHTT	12.1785	speed
3	3	siHTT_mHTT	12.3483	speed
4	1	siHTT_mHTT	13.3406	speed
4	2	siHTT_mHTT	12.9675	speed
4	3	siHTT_mHTT	13.0902	speed
5	1	siHTT_mHTT	11.9504	speed
5	2	siHTT_mHTT	12.7904	speed
5	3	siHTT_mHTT	12.8269	speed
6	1	siHTT_mHTT	12.1908	speed
6	2	siHTT_mHTT	11.4946	speed
6	3	siHTT_mHTT	11.2849	speed
7	1	siHTT_mHTT	11.7322	speed
7	2	siHTT_mHTT	11.4024	speed
7	3	siHTT_mHTT	13.0223	speed
8	1	siHTT_mHTT	11.0121	speed
8	2	siHTT_mHTT	11.0566	speed
8	3	siHTT_mHTT	10.1266	speed
9	1	siHTT_mHTT	10.4858	speed
9	2	siHTT_mHTT	9.0189	speed
9	3	siHTT_mHTT	11.8044	speed
10	1	siHTT_mHTT	10.0427	speed
10	2	siHTT_mHTT	10.3881	speed
10	3	siHTT_mHTT	11.3715	speed
1	7	siHTT_mHTT	12.1086	speed
1	8	siHTT_mHTT	12.646	speed
3	7	siHTT_mHTT	12.0175	speed
3	8	siHTT_mHTT	12.5373	speed
4	7	siHTT_mHTT	12.9588	speed
4	8	siHTT_mHTT	10.0204	speed
5	7	siHTT_mHTT	11.3736	speed
5	8	siHTT_mHTT	11.54	speed
6	7	siHTT_mHTT	10.959	speed
6	8	siHTT_mHTT	12.3352	speed
7	7	siHTT_mHTT	10.2637	speed
7	8	siHTT_mHTT	10.7669	speed
8	7	siHTT_mHTT	10.0301	speed
8	8	siHTT_mHTT	8.88182	speed
9	7	siHTT_mHTT	9.64031	speed
9	8	siHTT_mHTT	10.9916	speed
10	7	siHTT_mHTT	10.3136	speed
10	8	siHTT_mHTT	11.3501	speed
1	4	siHTT_mHTT	11.1179	speed
1	5	siHTT_mHTT	11.3765	speed
1	6	siHTT_mHTT	11.7362	speed
2	4	siHTT_mHTT	12.7894	speed
2	5	siHTT_mHTT	11.813	speed
2	6	siHTT_mHTT	12.598	speed
3	4	siHTT_mHTT	13.4608	speed
3	5	siHTT_mHTT	12.0146	speed
3	6	siHTT_mHTT	13.1219	speed
4	4	siHTT_mHTT	12.3913	speed
4	5	siHTT_mHTT	12.9165	speed
4	6	siHTT_mHTT	13.6539	speed
5	4	siHTT_mHTT	13.2623	speed
5	5	siHTT_mHTT	11.9848	speed
5	6	siHTT_mHTT	12.8782	speed
6	4	siHTT_mHTT	13.4956	speed
6	5	siHTT_mHTT	12.6152	speed
6	6	siHTT_mHTT	13.0176	speed
7	4	siHTT_mHTT	12.389	speed
7	5	siHTT_mHTT	10.6879	speed
7	6	siHTT_mHTT	11.3785	speed
8	4	siHTT_mHTT	12.4599	speed
8	5	siHTT_mHTT	11.2122	speed
8	6	siHTT_mHTT	11.5155	speed
9	4	siHTT_mHTT	12.5042	speed
9	5	siHTT_mHTT	10.6103	speed
9	6	siHTT_mHTT	11.1271	speed
10	4	siHTT_mHTT	13.4031	speed
10	5	siHTT_mHTT	11.5721	speed
10	6	siHTT_mHTT	12.0924	speed
1	9	siHTT_mHTT	12.2459	speed
2	9	siHTT_mHTT	12.3805	speed
3	9	siHTT_mHTT	12.261	speed
4	9	siHTT_mHTT	11.9516	speed
5	9	siHTT_mHTT	11.0894	speed
6	9	siHTT_mHTT	11.2352	speed
7	9	siHTT_mHTT	10.0953	speed
8	9	siHTT_mHTT	8.62021	speed
9	9	siHTT_mHTT	9.99235	speed
1	10	siHTT_mHTT	12.2693	speed
1	11	siHTT_mHTT	12.8241	speed
2	10	siHTT_mHTT	11.4573	speed
2	11	siHTT_mHTT	13.0712	speed
3	10	siHTT_mHTT	12.6423	speed
3	11	siHTT_mHTT	13.9854	speed
4	10	siHTT_mHTT	12.3143	speed
4	11	siHTT_mHTT	12.847	speed
5	10	siHTT_mHTT	11.055	speed
5	11	siHTT_mHTT	12.4258	speed
6	10	siHTT_mHTT	10.7495	speed
6	11	siHTT_mHTT	11.2505	speed
7	10	siHTT_mHTT	10.4356	speed
7	11	siHTT_mHTT	10.5146	speed
8	10	siHTT_mHTT	9.93952	speed
8	11	siHTT_mHTT	11.6061	speed
9	10	siHTT_mHTT	12.0026	speed
9	11	siHTT_mHTT	12.4761	speed
1	1	nontargeting_mHTT	13.4893	speed
2	1	nontargeting_mHTT	11.7209	speed
3	1	nontargeting_mHTT	13.0647	speed
4	1	nontargeting_mHTT	11.2553	speed
5	1	nontargeting_mHTT	10.5882	speed
6	1	nontargeting_mHTT	8.47771	speed
7	1	nontargeting_mHTT	5.13439	speed
8	1	nontargeting_mHTT	7.56117	speed
9	1	nontargeting_mHTT		speed
10	1	nontargeting_mHTT		speed
1	2	nontargeting_mHTT	9.33197	speed
1	3	nontargeting_mHTT	11.2318	speed
2	2	nontargeting_mHTT	8.73295	speed
2	3	nontargeting_mHTT	9.36737	speed
3	2	nontargeting_mHTT	8.23746	speed
3	3	nontargeting_mHTT	9.14091	speed
4	2	nontargeting_mHTT	7.81995	speed
4	3	nontargeting_mHTT	8.36639	speed
5	2	nontargeting_mHTT	6.70907	speed
5	3	nontargeting_mHTT	6.15803	speed
6	2	nontargeting_mHTT	5.89128	speed
6	3	nontargeting_mHTT	7.60652	speed
7	2	nontargeting_mHTT	3.89438	speed
7	3	nontargeting_mHTT	5.71921	speed
8	2	nontargeting_mHTT	3.92795	speed
8	3	nontargeting_mHTT	5.20582	speed
9	2	nontargeting_mHTT	4.81987	speed
9	3	nontargeting_mHTT	4.19088	speed
1	4	nontargeting_mHTT	12.6572	speed
2	4	nontargeting_mHTT	12.7542	speed
3	4	nontargeting_mHTT	12.1557	speed
4	4	nontargeting_mHTT	11.3481	speed
5	4	nontargeting_mHTT	10.6394	speed
6	4	nontargeting_mHTT	8.08123	speed
7	4	nontargeting_mHTT	6.96912	speed
8	4	nontargeting_mHTT	5.99274	speed
9	4	nontargeting_mHTT	6.60172	speed
1	1	siHTT_mHTT	13.9473	turning
1	2	siHTT_mHTT	12.4551	turning
1	3	siHTT_mHTT	12.882	turning
3	1	siHTT_mHTT	14.3544	turning
3	2	siHTT_mHTT	13.604	turning
3	3	siHTT_mHTT	13.507	turning
4	1	siHTT_mHTT	14.2876	turning
4	2	siHTT_mHTT	13.3496	turning
4	3	siHTT_mHTT	13.7406	turning
5	1	siHTT_mHTT	14.0488	turning
5	2	siHTT_mHTT	13.6694	turning
5	3	siHTT_mHTT	14.6456	turning
6	1	siHTT_mHTT	14.8018	turning
6	2	siHTT_mHTT	13.402	turning
6	3	siHTT_mHTT	14.0892	turning
7	1	siHTT_mHTT	15.9545	turning
7	2	siHTT_mHTT	13.3765	turning
7	3	siHTT_mHTT	13.266	turning
8	1	siHTT_mHTT	14.9624	turning
8	2	siHTT_mHTT	14.3812	turning
8	3	siHTT_mHTT	14.3041	turning
9	1	siHTT_mHTT	14.9486	turning
9	2	siHTT_mHTT	17.0392	turning
9	3	siHTT_mHTT	14.0238	turning
10	1	siHTT_mHTT	15.1182	turning
10	2	siHTT_mHTT	14.4388	turning
10	3	siHTT_mHTT	14.3657	turning
1	7	siHTT_mHTT	13.6004	turning
1	8	siHTT_mHTT	12.584	turning
3	7	siHTT_mHTT	14.5691	turning
3	8	siHTT_mHTT	12.7684	turning
4	7	siHTT_mHTT	14.5925	turning
4	8	siHTT_mHTT	14.5615	turning
5	7	siHTT_mHTT	13.6796	turning
5	8	siHTT_mHTT	14.3128	turning
6	7	siHTT_mHTT	15.0746	turning
6	8	siHTT_mHTT	12.9052	turning
7	7	siHTT_mHTT	15.4639	turning
7	8	siHTT_mHTT	14.6243	turning
8	7	siHTT_mHTT	14.2106	turning
8	8	siHTT_mHTT	14.6197	turning
9	7	siHTT_mHTT	13.7465	turning
9	8	siHTT_mHTT	13.9648	turning
10	7	siHTT_mHTT	14.8862	turning
10	8	siHTT_mHTT	13.9586	turning
1	4	siHTT_mHTT	13.5404	turning
1	5	siHTT_mHTT	14.2652	turning
1	6	siHTT_mHTT	14.426	turning
2	4	siHTT_mHTT	14.1808	turning
2	5	siHTT_mHTT	14.9048	turning
2	6	siHTT_mHTT	13.9691	turning
3	4	siHTT_mHTT	14.7773	turning
3	5	siHTT_mHTT	13.9383	turning
3	6	siHTT_mHTT	14.6173	turning
4	4	siHTT_mHTT	15.4089	turning
4	5	siHTT_mHTT	15.6678	turning
4	6	siHTT_mHTT	16.3747	turning
5	4	siHTT_mHTT	12.9731	turning
5	5	siHTT_mHTT	14.7238	turning
5	6	siHTT_mHTT	13.9939	turning
6	4	siHTT_mHTT	13.6194	turning
6	5	siHTT_mHTT	14.9566	turning
6	6	siHTT_mHTT	14.1358	turning
7	4	siHTT_mHTT	14.2628	turning
7	5	siHTT_mHTT	14.9138	turning
7	6	siHTT_mHTT	14.5564	turning
8	4	siHTT_mHTT	15.4454	turning
8	5	siHTT_mHTT	16.0054	turning
8	6	siHTT_mHTT	14.6995	turning
9	4	siHTT_mHTT	14.2263	turning
9	5	siHTT_mHTT	15.8744	turning
9	6	siHTT_mHTT	14.4496	turning
10	4	siHTT_mHTT	15.3705	turning
10	5	siHTT_mHTT	15.8904	turning
10	6	siHTT_mHTT	14.5403	turning
1	9	siHTT_mHTT	13.8684	turning
2	9	siHTT_mHTT	13.918	turning
3	9	siHTT_mHTT	14.9012	turning
4	9	siHTT_mHTT	13.7736	turning
5	9	siHTT_mHTT	15.1282	turning
6	9	siHTT_mHTT	14.785	turning
7	9	siHTT_mHTT	15.4108	turning
8	9	siHTT_mHTT	17.3603	turning
9	9	siHTT_mHTT	15.704	turning
1	10	siHTT_mHTT	12.7535	turning
1	11	siHTT_mHTT	13.5561	turning
2	10	siHTT_mHTT	14.5487	turning
2	11	siHTT_mHTT	14.4259	turning
3	10	siHTT_mHTT	14.0578	turning
3	11	siHTT_mHTT	14.2332	turning
4	10	siHTT_mHTT	12.914	turning
4	11	siHTT_mHTT	13.5552	turning
5	10	siHTT_mHTT	12.4045	turning
5	11	siHTT_mHTT	13.1521	turning
6	10	siHTT_mHTT	14.3788	turning
6	11	siHTT_mHTT	15.3134	turning
7	10	siHTT_mHTT	13.9525	turning
7	11	siHTT_mHTT	14.1508	turning
8	10	siHTT_mHTT	14.0965	turning
8	11	siHTT_mHTT	14.0664	turning
9	10	siHTT_mHTT	14.7027	turning
9	11	siHTT_mHTT	14.5746	turning
1	1	nontargeting_mHTT	13.5254	turning
2	1	nontargeting_mHTT	15.9136	turning
3	1	nontargeting_mHTT	14.0004	turning
4	1	nontargeting_mHTT	18.0646	turning
5	1	nontargeting_mHTT	13.5351	turning
6	1	nontargeting_mHTT	15.3474	turning
7	1	nontargeting_mHTT	21.5386	turning
8	1	nontargeting_mHTT	18.5389	turning
9	1	nontargeting_mHTT		turning
10	1	nontargeting_mHTT		turning
1	2	nontargeting_mHTT	18.0349	turning
1	3	nontargeting_mHTT	13.5515	turning
2	2	nontargeting_mHTT	17.677	turning
2	3	nontargeting_mHTT	13.9983	turning
3	2	nontargeting_mHTT	18.7691	turning
3	3	nontargeting_mHTT	17.168	turning
4	2	nontargeting_mHTT	16.4888	turning
4	3	nontargeting_mHTT	15.7358	turning
5	2	nontargeting_mHTT	18.385	turning
5	3	nontargeting_mHTT	18.6862	turning
6	2	nontargeting_mHTT	21.1724	turning
6	3	nontargeting_mHTT	17.0698	turning
7	2	nontargeting_mHTT	27.9483	turning
7	3	nontargeting_mHTT	20.1751	turning
8	2	nontargeting_mHTT	30.4746	turning
8	3	nontargeting_mHTT	22.4915	turning
9	2	nontargeting_mHTT	22.2057	turning
9	3	nontargeting_mHTT	26.3031	turning
1	4	nontargeting_mHTT	14.7176	turning
2	4	nontargeting_mHTT	15.2717	turning
3	4	nontargeting_mHTT	17.1754	turning
4	4	nontargeting_mHTT	15.7527	turning
5	4	nontargeting_mHTT	14.4712	turning
6	4	nontargeting_mHTT	18.4258	turning
7	4	nontargeting_mHTT	18.5473	turning
8	4	nontargeting_mHTT	22.5506	turning
9	4	nontargeting_mHTT	19.6047	turning
1	1	siHTT_mHTT	17.3479	stumbling
1	2	siHTT_mHTT	15.5724	stumbling
1	3	siHTT_mHTT	15.4823	stumbling
3	1	siHTT_mHTT	14.9246	stumbling
3	2	siHTT_mHTT	13.5788	stumbling
3	3	siHTT_mHTT	15.3536	stumbling
4	1	siHTT_mHTT	16.6186	stumbling
4	2	siHTT_mHTT	14.3211	stumbling
4	3	siHTT_mHTT	14.3775	stumbling
5	1	siHTT_mHTT	17.0719	stumbling
5	2	siHTT_mHTT	15.0965	stumbling
5	3	siHTT_mHTT	17.1928	stumbling
6	1	siHTT_mHTT	15.2108	stumbling
6	2	siHTT_mHTT	14.7046	stumbling
6	3	siHTT_mHTT	16.6373	stumbling
7	1	siHTT_mHTT	15.5573	stumbling
7	2	siHTT_mHTT	13.6175	stumbling
7	3	siHTT_mHTT	14.3314	stumbling
8	1	siHTT_mHTT	15.2554	stumbling
8	2	siHTT_mHTT	15.1508	stumbling
8	3	siHTT_mHTT	15.5878	stumbling
9	1	siHTT_mHTT	14.7474	stumbling
9	2	siHTT_mHTT	18.9082	stumbling
9	3	siHTT_mHTT	15.5592	stumbling
10	1	siHTT_mHTT	15.3875	stumbling
10	2	siHTT_mHTT	16.8238	stumbling
10	3	siHTT_mHTT	15.6058	stumbling
1	7	siHTT_mHTT	16.9476	stumbling
1	8	siHTT_mHTT	15.3277	stumbling
3	7	siHTT_mHTT	14.9394	stumbling
3	8	siHTT_mHTT	12.5035	stumbling
4	7	siHTT_mHTT	14.5363	stumbling
4	8	siHTT_mHTT	14.6346	stumbling
5	7	siHTT_mHTT	13.5749	stumbling
5	8	siHTT_mHTT	16.9677	stumbling
6	7	siHTT_mHTT	16.4111	stumbling
6	8	siHTT_mHTT	15.9105	stumbling
7	7	siHTT_mHTT	14.6491	stumbling
7	8	siHTT_mHTT	14.6389	stumbling
8	7	siHTT_mHTT	13.4859	stumbling
8	8	siHTT_mHTT	15.1562	stumbling
9	7	siHTT_mHTT	12.664	stumbling
9	8	siHTT_mHTT	14.3893	stumbling
10	7	siHTT_mHTT	14.2746	stumbling
10	8	siHTT_mHTT	14.2004	stumbling
1	4	siHTT_mHTT	19.3794	stumbling
1	5	siHTT_mHTT	16.7952	stumbling
1	6	siHTT_mHTT	18.5027	stumbling
2	4	siHTT_mHTT	15.3372	stumbling
2	5	siHTT_mHTT	16.1059	stumbling
2	6	siHTT_mHTT	13.7542	stumbling
3	4	siHTT_mHTT	17.8066	stumbling
3	5	siHTT_mHTT	14.4729	stumbling
3	6	siHTT_mHTT	16.1582	stumbling
4	4	siHTT_mHTT	16.948	stumbling
4	5	siHTT_mHTT	16.5305	stumbling
4	6	siHTT_mHTT	15.7397	stumbling
5	4	siHTT_mHTT	13.8924	stumbling
5	5	siHTT_mHTT	15.3752	stumbling
5	6	siHTT_mHTT	14.661	stumbling
6	4	siHTT_mHTT	16.4531	stumbling
6	5	siHTT_mHTT	15.8807	stumbling
6	6	siHTT_mHTT	16.8821	stumbling
7	4	siHTT_mHTT	17.3324	stumbling
7	5	siHTT_mHTT	14.8993	stumbling
7	6	siHTT_mHTT	15.1866	stumbling
8	4	siHTT_mHTT	20.6674	stumbling
8	5	siHTT_mHTT	20.3206	stumbling
8	6	siHTT_mHTT	17.0971	stumbling
9	4	siHTT_mHTT	16.8346	stumbling
9	5	siHTT_mHTT	16.7149	stumbling
9	6	siHTT_mHTT	14.1943	stumbling
10	4	siHTT_mHTT	16.7641	stumbling
10	5	siHTT_mHTT	16.7995	stumbling
10	6	siHTT_mHTT	16.2759	stumbling
1	9	siHTT_mHTT	15.1169	stumbling
2	9	siHTT_mHTT	15.7852	stumbling
3	9	siHTT_mHTT	18.2741	stumbling
4	9	siHTT_mHTT	14.9755	stumbling
5	9	siHTT_mHTT	17.516	stumbling
6	9	siHTT_mHTT	16.5289	stumbling
7	9	siHTT_mHTT	15.5951	stumbling
8	9	siHTT_mHTT	16.9292	stumbling
9	9	siHTT_mHTT	16.8051	stumbling
1	10	siHTT_mHTT	12.6519	stumbling
1	11	siHTT_mHTT	15.1497	stumbling
2	10	siHTT_mHTT	15.3477	stumbling
2	11	siHTT_mHTT	17.7347	stumbling
3	10	siHTT_mHTT	14.9369	stumbling
3	11	siHTT_mHTT	17.2023	stumbling
4	10	siHTT_mHTT	13.9652	stumbling
4	11	siHTT_mHTT	15.2938	stumbling
5	10	siHTT_mHTT	13.0977	stumbling
5	11	siHTT_mHTT	14.9653	stumbling
6	10	siHTT_mHTT	14.5877	stumbling
6	11	siHTT_mHTT	16.7811	stumbling
7	10	siHTT_mHTT	13.2715	stumbling
7	11	siHTT_mHTT	13.9245	stumbling
8	10	siHTT_mHTT	13.2456	stumbling
8	11	siHTT_mHTT	14.2931	stumbling
9	10	siHTT_mHTT	14.7833	stumbling
9	11	siHTT_mHTT	14.3904	stumbling
1	1	nontargeting_mHTT	14.7713	stumbling
2	1	nontargeting_mHTT	16.4493	stumbling
3	1	nontargeting_mHTT	14.307	stumbling
4	1	nontargeting_mHTT	19.0783	stumbling
5	1	nontargeting_mHTT	13.5266	stumbling
6	1	nontargeting_mHTT	15.2317	stumbling
7	1	nontargeting_mHTT	22.5309	stumbling
8	1	nontargeting_mHTT	19.0832	stumbling
9	1	nontargeting_mHTT		stumbling
10	1	nontargeting_mHTT		stumbling
1	2	nontargeting_mHTT	17.1725	stumbling
1	3	nontargeting_mHTT	13.3189	stumbling
2	2	nontargeting_mHTT	17.5131	stumbling
2	3	nontargeting_mHTT	14.5397	stumbling
3	2	nontargeting_mHTT	20.9881	stumbling
3	3	nontargeting_mHTT	18.2889	stumbling
4	2	nontargeting_mHTT	17.4632	stumbling
4	3	nontargeting_mHTT	17.0634	stumbling
5	2	nontargeting_mHTT	19.3108	stumbling
5	3	nontargeting_mHTT	20.8689	stumbling
6	2	nontargeting_mHTT	22.0906	stumbling
6	3	nontargeting_mHTT	16.0961	stumbling
7	2	nontargeting_mHTT	30.6112	stumbling
7	3	nontargeting_mHTT	19.4052	stumbling
8	2	nontargeting_mHTT	30.3666	stumbling
8	3	nontargeting_mHTT	22.3671	stumbling
9	2	nontargeting_mHTT	22.7956	stumbling
9	3	nontargeting_mHTT	26.241	stumbling
1	4	nontargeting_mHTT	13.7886	stumbling
2	4	nontargeting_mHTT	14.6857	stumbling
3	4	nontargeting_mHTT	17.2297	stumbling
4	4	nontargeting_mHTT	15.4953	stumbling
5	4	nontargeting_mHTT	13.8316	stumbling
6	4	nontargeting_mHTT	19.763	stumbling
7	4	nontargeting_mHTT	18.5059	stumbling
8	4	nontargeting_mHTT	23.3431	stumbling
9	4	nontargeting_mHTT	19.339	stumbling
1	1	spn42de_hpRNA_mHTT	12.174	xspeed
1	2	spn42de_hpRNA_mHTT	12.8457	xspeed
1	3	spn42de_hpRNA_mHTT	11.9037	xspeed
3	1	spn42de_hpRNA_mHTT	11.7605	xspeed
3	2	spn42de_hpRNA_mHTT	10.9617	xspeed
3	3	spn42de_hpRNA_mHTT	12.6662	xspeed
4	1	spn42de_hpRNA_mHTT	11.5997	xspeed
4	2	spn42de_hpRNA_mHTT	12.3547	xspeed
4	3	spn42de_hpRNA_mHTT	12.1416	xspeed
5	1	spn42de_hpRNA_mHTT	9.00694	xspeed
5	2	spn42de_hpRNA_mHTT	10.6286	xspeed
5	3	spn42de_hpRNA_mHTT	10.3272	xspeed
6	1	spn42de_hpRNA_mHTT	8.21871	xspeed
6	2	spn42de_hpRNA_mHTT	9.60649	xspeed
6	3	spn42de_hpRNA_mHTT	9.57038	xspeed
7	1	spn42de_hpRNA_mHTT	7.34923	xspeed
7	2	spn42de_hpRNA_mHTT	8.51115	xspeed
7	3	spn42de_hpRNA_mHTT	8.55341	xspeed
8	1	spn42de_hpRNA_mHTT	4.80438	xspeed
8	2	spn42de_hpRNA_mHTT	5.55014	xspeed
8	3	spn42de_hpRNA_mHTT	7.44959	xspeed
9	1	spn42de_hpRNA_mHTT	5.05463	xspeed
9	2	spn42de_hpRNA_mHTT	6.51571	xspeed
9	3	spn42de_hpRNA_mHTT	5.88993	xspeed
10	1	spn42de_hpRNA_mHTT	4.3058	xspeed
10	2	spn42de_hpRNA_mHTT	4.38325	xspeed
10	3	spn42de_hpRNA_mHTT	3.57064	xspeed
1	4	spn42de_hpRNA_mHTT	13.8715	xspeed
1	5	spn42de_hpRNA_mHTT	12.1423	xspeed
2	4	spn42de_hpRNA_mHTT	13.5856	xspeed
2	5	spn42de_hpRNA_mHTT	12.4837	xspeed
3	4	spn42de_hpRNA_mHTT	13.8676	xspeed
3	5	spn42de_hpRNA_mHTT	12.7242	xspeed
4	4	spn42de_hpRNA_mHTT	11.4256	xspeed
4	5	spn42de_hpRNA_mHTT	11.8324	xspeed
5	4	spn42de_hpRNA_mHTT	11.5884	xspeed
5	5	spn42de_hpRNA_mHTT	7.99127	xspeed
6	4	spn42de_hpRNA_mHTT	8.84243	xspeed
6	5	spn42de_hpRNA_mHTT	10.0853	xspeed
7	4	spn42de_hpRNA_mHTT	8.27475	xspeed
7	5	spn42de_hpRNA_mHTT	7.6109	xspeed
8	4	spn42de_hpRNA_mHTT	5.87307	xspeed
8	5	spn42de_hpRNA_mHTT	6.09029	xspeed
9	4	spn42de_hpRNA_mHTT	6.47973	xspeed
9	5	spn42de_hpRNA_mHTT	5.89021	xspeed
1	1	spn42de_hpRNA_mHTT	13.0628	speed
1	2	spn42de_hpRNA_mHTT	13.783	speed
1	3	spn42de_hpRNA_mHTT	12.9366	speed
3	1	spn42de_hpRNA_mHTT	12.7137	speed
3	2	spn42de_hpRNA_mHTT	11.8702	speed
3	3	spn42de_hpRNA_mHTT	13.6852	speed
4	1	spn42de_hpRNA_mHTT	12.3579	speed
4	2	spn42de_hpRNA_mHTT	13.186	speed
4	3	spn42de_hpRNA_mHTT	13.2013	speed
5	1	spn42de_hpRNA_mHTT	9.80396	speed
5	2	spn42de_hpRNA_mHTT	11.395	speed
5	3	spn42de_hpRNA_mHTT	11.6162	speed
6	1	spn42de_hpRNA_mHTT	8.87489	speed
6	2	spn42de_hpRNA_mHTT	10.1613	speed
6	3	spn42de_hpRNA_mHTT	10.1259	speed
7	1	spn42de_hpRNA_mHTT	7.93291	speed
7	2	spn42de_hpRNA_mHTT	9.07307	speed
7	3	spn42de_hpRNA_mHTT	9.01279	speed
8	1	spn42de_hpRNA_mHTT	5.30451	speed
8	2	spn42de_hpRNA_mHTT	6.01743	speed
8	3	spn42de_hpRNA_mHTT	7.83604	speed
9	1	spn42de_hpRNA_mHTT	5.50929	speed
9	2	spn42de_hpRNA_mHTT	7.04841	speed
9	3	spn42de_hpRNA_mHTT	6.52343	speed
10	1	spn42de_hpRNA_mHTT	4.79308	speed
10	2	spn42de_hpRNA_mHTT	4.78969	speed
10	3	spn42de_hpRNA_mHTT	4.0392	speed
1	4	spn42de_hpRNA_mHTT	14.9697	speed
1	5	spn42de_hpRNA_mHTT	13.0327	speed
2	4	spn42de_hpRNA_mHTT	14.9123	speed
2	5	spn42de_hpRNA_mHTT	13.4602	speed
3	4	spn42de_hpRNA_mHTT	15.0024	speed
3	5	spn42de_hpRNA_mHTT	13.9651	speed
4	4	spn42de_hpRNA_mHTT	12.3693	speed
4	5	spn42de_hpRNA_mHTT	12.5514	speed
5	4	spn42de_hpRNA_mHTT	12.4343	speed
5	5	spn42de_hpRNA_mHTT	8.44096	speed
6	4	spn42de_hpRNA_mHTT	9.59329	speed
6	5	spn42de_hpRNA_mHTT	10.6439	speed
7	4	spn42de_hpRNA_mHTT	8.96187	speed
7	5	spn42de_hpRNA_mHTT	8.25207	speed
8	4	spn42de_hpRNA_mHTT	6.81296	speed
8	5	spn42de_hpRNA_mHTT	6.54012	speed
9	4	spn42de_hpRNA_mHTT	7.44442	speed
9	5	spn42de_hpRNA_mHTT	6.32131	speed
1	1	spn42de_hpRNA_mHTT	13.6126	turning
1	2	spn42de_hpRNA_mHTT	13.0391	turning
1	3	spn42de_hpRNA_mHTT	14.9135	turning
3	1	spn42de_hpRNA_mHTT	15.7335	turning
3	2	spn42de_hpRNA_mHTT	14.9449	turning
3	3	spn42de_hpRNA_mHTT	15.2568	turning
4	1	spn42de_hpRNA_mHTT	16.0492	turning
4	2	spn42de_hpRNA_mHTT	15.4666	turning
4	3	spn42de_hpRNA_mHTT	16.3441	turning
5	1	spn42de_hpRNA_mHTT	17.5457	turning
5	2	spn42de_hpRNA_mHTT	15.3279	turning
5	3	spn42de_hpRNA_mHTT	16.2976	turning
6	1	spn42de_hpRNA_mHTT	16.1386	turning
6	2	spn42de_hpRNA_mHTT	14.9507	turning
6	3	spn42de_hpRNA_mHTT	15.5513	turning
7	1	spn42de_hpRNA_mHTT	17.1484	turning
7	2	spn42de_hpRNA_mHTT	14.6949	turning
7	3	spn42de_hpRNA_mHTT	15.4146	turning
8	1	spn42de_hpRNA_mHTT	24.7597	turning
8	2	spn42de_hpRNA_mHTT	22.9834	turning
8	3	spn42de_hpRNA_mHTT	16.4617	turning
9	1	spn42de_hpRNA_mHTT	21.4203	turning
9	2	spn42de_hpRNA_mHTT	19.6889	turning
9	3	spn42de_hpRNA_mHTT	19.6484	turning
10	1	spn42de_hpRNA_mHTT	24.3868	turning
10	2	spn42de_hpRNA_mHTT	25.8148	turning
10	3	spn42de_hpRNA_mHTT	24.8474	turning
1	4	spn42de_hpRNA_mHTT	14.3217	turning
1	5	spn42de_hpRNA_mHTT	14.5356	turning
2	4	spn42de_hpRNA_mHTT	16.0747	turning
2	5	spn42de_hpRNA_mHTT	16.1855	turning
3	4	spn42de_hpRNA_mHTT	15.6815	turning
3	5	spn42de_hpRNA_mHTT	16.1839	turning
4	4	spn42de_hpRNA_mHTT	15.966	turning
4	5	spn42de_hpRNA_mHTT	15.4131	turning
5	4	spn42de_hpRNA_mHTT	15.0573	turning
5	5	spn42de_hpRNA_mHTT	18.0658	turning
6	4	spn42de_hpRNA_mHTT	16.6812	turning
6	5	spn42de_hpRNA_mHTT	16.672	turning
7	4	spn42de_hpRNA_mHTT	16.6184	turning
7	5	spn42de_hpRNA_mHTT	18.0941	turning
8	4	spn42de_hpRNA_mHTT	22.0871	turning
8	5	spn42de_hpRNA_mHTT	20.7196	turning
9	4	spn42de_hpRNA_mHTT	19.121	turning
9	5	spn42de_hpRNA_mHTT	20.1175	turning
1	1	spn42de_hpRNA_mHTT	14.5982	stumbling
1	2	spn42de_hpRNA_mHTT	14.3629	stumbling
1	3	spn42de_hpRNA_mHTT	15.5744	stumbling
3	1	spn42de_hpRNA_mHTT	15.9195	stumbling
3	2	spn42de_hpRNA_mHTT	16.2313	stumbling
3	3	spn42de_hpRNA_mHTT	15.3507	stumbling
4	1	spn42de_hpRNA_mHTT	15.946	stumbling
4	2	spn42de_hpRNA_mHTT	15.9947	stumbling
4	3	spn42de_hpRNA_mHTT	17.0329	stumbling
5	1	spn42de_hpRNA_mHTT	20.1997	stumbling
5	2	spn42de_hpRNA_mHTT	16.1597	stumbling
5	3	spn42de_hpRNA_mHTT	20.5033	stumbling
6	1	spn42de_hpRNA_mHTT	17.0981	stumbling
6	2	spn42de_hpRNA_mHTT	14.7334	stumbling
6	3	spn42de_hpRNA_mHTT	15.1454	stumbling
7	1	spn42de_hpRNA_mHTT	17.7394	stumbling
7	2	spn42de_hpRNA_mHTT	14.9067	stumbling
7	3	spn42de_hpRNA_mHTT	15.1412	stumbling
8	1	spn42de_hpRNA_mHTT	22.9097	stumbling
8	2	spn42de_hpRNA_mHTT	22.311	stumbling
8	3	spn42de_hpRNA_mHTT	16.4416	stumbling
9	1	spn42de_hpRNA_mHTT	21.0191	stumbling
9	2	spn42de_hpRNA_mHTT	19.7484	stumbling
9	3	spn42de_hpRNA_mHTT	21.307	stumbling
10	1	spn42de_hpRNA_mHTT	23.8481	stumbling
10	2	spn42de_hpRNA_mHTT	23.5104	stumbling
10	3	spn42de_hpRNA_mHTT	22.4491	stumbling
1	4	spn42de_hpRNA_mHTT	14.14	stumbling
1	5	spn42de_hpRNA_mHTT	14.8139	stumbling
2	4	spn42de_hpRNA_mHTT	16.4006	stumbling
2	5	spn42de_hpRNA_mHTT	16.2553	stumbling
3	4	spn42de_hpRNA_mHTT	15.239	stumbling
3	5	spn42de_hpRNA_mHTT	16.4766	stumbling
4	4	spn42de_hpRNA_mHTT	15.7326	stumbling
4	5	spn42de_hpRNA_mHTT	15.2716	stumbling
5	4	spn42de_hpRNA_mHTT	15.3142	stumbling
5	5	spn42de_hpRNA_mHTT	17.3339	stumbling
6	4	spn42de_hpRNA_mHTT	16.3948	stumbling
6	5	spn42de_hpRNA_mHTT	15.5734	stumbling
7	4	spn42de_hpRNA_mHTT	15.1612	stumbling
7	5	spn42de_hpRNA_mHTT	16.9664	stumbling
8	4	spn42de_hpRNA_mHTT	23.7896	stumbling
8	5	spn42de_hpRNA_mHTT	20.96	stumbling
9	4	spn42de_hpRNA_mHTT	20.3851	stumbling
9	5	spn42de_hpRNA_mHTT	19.3155	stumbling

## Sheet: Raw Data
Replicate	Genotype	xspeed	speed	turning	stumbling	flycount	xspeed_se	speed_se	turning_se	stumbling_se
1	siHTT_mHTT	13.762	14.7138	12.5001	13.1094	11	0.684417	0.651299	0.431577	0.470585
2	siHTT_mHTT	12.9192	13.664	13.4664	14.4041	10	0.151367	0.147078	0.126639	0.255852
3	siHTT_mHTT	12.2414	13.033	13.6596	14.8049	9	0.638326	0.659055	0.0425227	0.70374
4	siHTT_mHTT	12.4204	13.1467	14.2555	15.179	9	0.574793	0.536645	0.583212	0.65597
5	siHTT_mHTT	11.3674	12.3277	15.1047	17.1818	10	0.419899	0.31358	0.247264	0.375055
6	siHTT_mHTT	11.7092	12.5118	13.138	14.3709	10	0.598349	0.520517	0.347002	0.888708
1	siHTT_mHTT	5.09124	6.05438	29.9202	26.9345	9	1.09239	1.05059	2.3282	1.99101
2	siHTT_mHTT	10.8183	11.6694	15.6095	15.9853	10	0.342049	0.357434	0.248337	0.392078
3	siHTT_mHTT	12.2149	12.9461	13.472	13.8743	10	0.279901	0.228108	0.889784	1.02177
4	siHTT_mHTT	9.39455	10.0757	16.6896	17.2931	8	0.644077	0.650559	1.1895	1.03344
5	siHTT_mHTT	11.1142	11.8458	17.0234	16.486	9	0.303521	0.331713	0.682709	0.673296
6	siHTT_mHTT	9.57201	10.2019	15.5254	15.5567	10	0.476268	0.463952	1.11023	0.736968
1	siHTT_mHTT	10.5874	11.539	15.5367	14.806	11	0.172063	0.0938289	0.829686	0.472603
2	siHTT_mHTT	10.8209	11.9312	15.2983	16.2062	10	0.142875	0.233155	0.362995	0.141526
3	siHTT_mHTT	11.316	12.0383	13.4943	14.277	10	0.305923	0.253748	0.56958	1.07158
4	siHTT_mHTT	11.2415	12.1373	15.2786	16.0614	9	0.575136	0.523462	1.04287	0.765223
5	siHTT_mHTT	11.0819	12.077	16.8404	17.3244	10	0.481493	0.458716	0.430246	0.373184
6	siHTT_mHTT	10.2835	10.9321	14.9647	14.7695	10	0.0455784	0.0375635	0.708457	0.225533
1	siHTT_mHTT	11.2443	12.2299	16.2222	15.9123	10	0.349658	0.288299	0.547248	0.392662
2	siHTT_mHTT	12.5119	13.5982	16.1338	16.903	10	0.101763	0.1186	0.200535	0.60488
3	siHTT_mHTT	12.2082	13.4928	15.9021	17.6182	10	0.174373	0.215092	0.163032	0.33789
4	siHTT_mHTT	12.657	13.827	15.1325	16.3717	9	0.604243	0.587739	1.11314	0.749769
5	siHTT_mHTT	11.6207	12.7392	17.0217	17.5773	10	0.178464	0.191986	0.551516	0.649586
6	siHTT_mHTT	11.3667	12.4524	16.1324	16.7303	10	0.131251	0.144741	0.401503	0.599687
1	siHTT_mHTT	12.0742	13.228	16.1209	17.9434	11	0.427234	0.413861	0.936939	0.646786
2	siHTT_mHTT	11.8461	12.8283	15.6621	17.8795	10	0.177856	0.0761291	0.757104	0.5525
3	siHTT_mHTT	11.7291	12.8577	15.5772	17.0242	9	0.417614	0.410388	0.123473	0.619154
4	siHTT_mHTT	11.1381	12.1463	16.9347	19.7993	9	0.658892	0.597489	1.24413	1.68966
5	siHTT_mHTT	11.7332	12.9148	16.9265	18.0559	10	0.0791252	0.104177	0.89668	1.41466
6	siHTT_mHTT	11.7381	12.9529	15.6152	17.4302	10	0.217041	0.197737	0.751353	0.493994
1	siHTT_mHTT	11.1419	12.0839	17.5379	16.8462	11	0.1068	0.204282	0.767456	1.35036
2	siHTT_mHTT	3.12188	4.02443	33.8196	32.4557	9	0.375026	0.446081	0.341073	0.650797
3	siHTT_mHTT	7.52774	8.68914	22.2508	22.3109	9	0.466744	0.464095	1.45188	2.00707
4	siHTT_mHTT	5.36502	6.11757	24.3516	23.1934	9	0.570339	0.51979	1.36484	1.24657
5	siHTT_mHTT	5.44176	6.10213	25.8172	23.6579	10	0.752227	0.809492	1.92519	1.91681
6	siHTT_mHTT	3.02771	4.16365	34.3831	34.4412	8	0.306234	0.330765	1.0572	1.624
1	siHTT_mHTT	10.0675	10.7962	18.9122	18.3635	11	0.838562	0.746824	1.77033	1.80803
2	siHTT_mHTT	12.3358	13.3136	16.3365	16.6383	10	0.141032	0.0910248	0.302658	0.232059
3	siHTT_mHTT	10.1339	11.0346	16.431	18.0567	9	0.175861	0.137303	0.39101	0.595856
4	siHTT_mHTT	3.6489	4.39036	29.7045	28.0958	8	0.52319	0.480966	2.27698	1.78057
5	siHTT_mHTT	9.70531	10.5964	17.4966	18.5561	10	0.515797	0.425501	0.789442	1.46832
6	siHTT_mHTT	4.88293	5.97819	27.7911	28.8819	8	0.599861	0.597708	0.48903	0.835638
1	siHTT_mHTT	6.77039	7.55194	22.8667	22.5179	10	0.937936	0.960189	2.25415	2.01107
2	siHTT_mHTT	10.2314	11.124	18.4113	18.2369	10	0.293974	0.199402	0.445214	0.277939
3	siHTT_mHTT	10.8634	11.5918	15.3958	15.7437	9	0.179406	0.238874	0.176898	0.582951
4	siHTT_mHTT	9.70723	10.5132	18.8417	18.6286	9	0.298193	0.318217	0.682165	0.556621
5	siHTT_mHTT	8.19493	8.92145	20.8618	20.3157	9	0.398045	0.472442	0.759888	0.277935
6	siHTT_mHTT	7.155	7.79369	20.7444	19.4309	9	0.330135	0.382104	0.167715	0.800615
1	spn42de_hpRNA_mHTT	13.7935	14.4803	11.2631	11.2674	10	0.367692	0.427473	0.631915	0.736764
2	spn42de_hpRNA_mHTT	11.7624	12.363	12.1	13.0044	10	0.576439	0.491621	0.933314	1.06304
3	spn42de_hpRNA_mHTT	10.1595	10.8368	13.6804	15.9671	8	0.193186	0.203371	0.377859	0.194419
4	spn42de_hpRNA_mHTT	11.6326	12.4501	12.5896	13.7532	13	0.234096	0.238109	0.528022	0.241953
1	spn42de_hpRNA_mHTT	5.03074	5.89492	27.0484	27.1106	9	0.798815	0.902352	1.17686	0.619474
2	spn42de_hpRNA_mHTT	5.06728	5.58856	26.2477	22.6608	9	0.896296	0.891414	2.79071	2.97832
3	spn42de_hpRNA_mHTT	5.83905	6.45524	23.3253	24.2139	9	0.745098	0.694666	2.28958	3.20391
4	spn42de_hpRNA_mHTT	5.51018	6.19964	23.5166	21.9707	11	0.258961	0.325798	0.224958	0.559077
1	spn42de_hpRNA_mHTT	8.49225	9.13077	14.173	14.1462	11	0.445322	0.359521	1.07352	1.37969
2	spn42de_hpRNA_mHTT	8.71389	9.36624	14.752	15.1184	10	0.505859	0.512469	0.409316	0.392562
3	spn42de_hpRNA_mHTT	9.89424	10.7871	15.0527	17.3143	8	0.384466	0.387407	1.15017	1.72292
4	spn42de_hpRNA_mHTT	8.05219	8.76983	16.4305	16.421	13	0.364632	0.375119	0.966786	1.13891
1	spn42de_hpRNA_mHTT	7.39077	8.02517	17.6325	20.1581	10	0.276212	0.22522	0.348128	1.87746
2	spn42de_hpRNA_mHTT	6.5805	7.27727	20.6197	22.5852	9	0.429134	0.372807	0.259291	1.04093
3	spn42de_hpRNA_mHTT	7.11783	7.98674	18.5762	23.1636	7	0.295859	0.321727	0.734215	2.10655
4	spn42de_hpRNA_mHTT	6.21016	6.81448	19.1765	20.2054	13	0.227187	0.28265	0.56432	0.627767
1	spn42de_hpRNA_mHTT	7.01352	7.61519	16.964	19.9989	8	0.360787	0.334377	1.04459	1.49359
2	spn42de_hpRNA_mHTT	6.1972	6.87326	21.1645	23.2623	10	0.249709	0.199292	0.523414	0.782574
3	spn42de_hpRNA_mHTT	5.70015	6.34894	20.693	23.7003	7	0.61944	0.702676	1.82486	0.405215
4	spn42de_hpRNA_mHTT	5.23205	5.75034	22.4454	21.4826	11	0.259938	0.221653	0.589646	1.37415
1	spn42de_hpRNA_mHTT	2.25514	3.61442	34.9898	37.8259	6	0.227696	0.213272	1.34328	1.07072
2	spn42de_hpRNA_mHTT	5.79843	6.52836	22.5059	23.461	8	0.0508317	0.145282	1.44323	1.54802
3	spn42de_hpRNA_mHTT	2.77542	3.84223	32.683	32.6436	4	0.185606	0.234456	2.08429	2.85076
4	spn42de_hpRNA_mHTT	3.04746	4.13518	30.9911	32.3925	4	0.297705	0.444174	2.13669	0.985347
1	spn42de_hpRNA_mHTT	1.88651	2.94401	35.9926	36.1424	5	0.0985913	0.287104	0.181364	1.29983
2	spn42de_hpRNA_mHTT	2.00591	3.32626	38.3253	37.8519	3	0.384146	0.515211	0.613474	0.984674
3	spn42de_hpRNA_mHTT	1.25166	2.59763	39.8413	40.2807	4	0.122423	0.109716	0.259374	0.265828
4	spn42de_hpRNA_mHTT	1.22334	2.5145	38.3692	39.4336	4	0.130512	0.289186	0.971865	2.22108
1	spn42de_hpRNA_mHTT	1.17907	2.51633	39.1419	43.0752	3	0.0238352	0.192238	0.551017	3.73993
2	spn42de_hpRNA_mHTT	1.71264	3.06804	38.6786	39.1021	3	0.124823	0.17597	1.04652	3.84576
3	spn42de_hpRNA_mHTT	2.72824	3.59745	34.0962	33.0371	2	1.09618	1.28394	4.44756	4.5607
4	spn42de_hpRNA_mHTT	1.56834	2.89074	38.3272	39.7691	3	0.195181	0.358366	2.00856	3.58168
1	nontargeting_mHTT	11.557	12.3142	12.3033	14.3193	11	0.290536	0.302911	0.31831	0.70253
2	nontargeting_mHTT	11.8742	12.6308	13.1013	13.6144	13	0.122333	0.106003	0.267478	0.307284
3	nontargeting_mHTT	12.713	13.5264	12.7368	13.4313	10	0.346132	0.341115	0.186084	0.16441
4	nontargeting_mHTT	11.4142	12.2002	12.86	13.2623	10	0.197419	0.207652	0.666514	0.327863
5	nontargeting_mHTT	10.4305	11.188	13.5427	14.715	9	0.394085	0.293724	0.85357	1.44733
1	nontargeting_mHTT	4.82603	5.37464	23.7315	23.6452	10	0.32347	0.302756	1.36152	1.49441
2	nontargeting_mHTT	3.90387	4.75222	28.5401	29.2267	11	0.413564	0.44708	0.994126	1.23332
3	nontargeting_mHTT	7.72529	8.48753	17.2398	18.8313	10	0.384076	0.343682	1.4688	1.59006
4	nontargeting_mHTT	6.3899	6.96186	18.9256	19.5466	8	0.45483	0.414414	0.238085	1.06276
5	nontargeting_mHTT	3.20668	4.36558	35.9731	34.6461	6	0.485746	0.470176	2.19718	2.03033
1	nontargeting_mHTT	6.64692	7.29201	18.6142	20.9016	11	0.153306	0.156123	0.658978	0.279231
2	nontargeting_mHTT	7.04333	7.58638	17.7133	18.1937	12	0.113554	0.156949	0.738386	1.52987
3	nontargeting_mHTT	8.76864	9.2716	15.4874	14.9065	10	0.230286	0.254484	0.605712	0.956338
4	nontargeting_mHTT	7.01794	7.56246	17.2976	17.2589	9	0.340552	0.319717	1.16094	1.3594
5	nontargeting_mHTT	7.45846	8.11008	16.1941	16.0663	9	0.147417	0.15583	0.220962	0.129715
1	nontargeting_mHTT	5.51975	6.15401	21.5073	24.6419	8	0.21311	0.221842	1.86549	1.26554
2	nontargeting_mHTT	5.86545	6.46948	21.8935	22.5156	10	0.671897	0.634438	2.57098	2.63715
3	nontargeting_mHTT	6.82148	7.38251	17.7552	18.319	9	0.223522	0.161985	1.31835	1.70158
4	nontargeting_mHTT	4.35444	4.83356	22.4881	23.6047	8	0.197927	0.176151	0.115532	1.41958
5	nontargeting_mHTT	5.99175	6.56178	19.4978	20.92	9	0.503599	0.523013	1.36381	1.992
1	nontargeting_mHTT	4.78796	5.32922	25.8807	25.5104	7	0.480032	0.535227	1.42484	0.404073
2	nontargeting_mHTT	4.79772	5.57071	25.6028	28.3493	7	0.189659	0.231601	0.880092	1.27014
3	nontargeting_mHTT	5.54185	6.4709	24.5343	25.826	6	0.21561	0.43341	0.981065	0.78757
4	nontargeting_mHTT	3.68837	4.52777	26.1745	28.114	7	0.308124	0.301578	1.37308	3.21172
5	nontargeting_mHTT	3.1162	3.94489	28.6168	31.3587	6	0.409451	0.273006	1.40691	2.2983
1	nontargeting_mHTT	3.29195	4.12184	34.4978	34.764	4	0.130553	0.262991	1.47161	2.27512
2	nontargeting_mHTT	3.78682	4.49659	28.3728	29.8201	9	0.298172	0.334292	1.06988	0.796607
3	nontargeting_mHTT	3.80858	4.46188	25.7139	25.3029	6	0.465946	0.480904	0.717674	1.22472
4	nontargeting_mHTT	3.58409	4.20041	27.0974	28.7356	5	0.296207	0.343737	0.394425	0.844185
5	nontargeting_mHTT	3.14246	3.66385	27.3346	27.7028	5	0.285125	0.208354	1.15334	2.71433
1	nontargeting_mHTT	2.95197	4.28301	34.8585	36.5571	4	0.672768	0.662825	3.59573	4.05158
2	nontargeting_mHTT	4.52461	5.62192	32.7431	34.8599	4	1.0262	1.11276	3.83535	2.14147
3	nontargeting_mHTT	3.93205	4.87202	28.0987	29.9939	5	0.938005	1.03296	3.0818	1.98269
4	nontargeting_mHTT	1.93678	3.11335	36.1029	38.035	3	0.347588	0.289817	1.24324	1.26918
5	nontargeting_mHTT	1.44066	2.81069	38.8721	41.52	3	0.0511188	0.129565	1.01719	0.576607
1	nontargeting_mHTT	5.8486	6.74535	27.9479	26.8602	3	0.665701	1.00768	0.872373	2.07567
2	nontargeting_mHTT	2.81116	3.95978	34.6691	34.3702	4	0.64488	0.700316	2.31488	0.66282
3	nontargeting_mHTT	4.71098	5.32409	23.8401	21.0748	2	0.597363	0.487951	1.21902	2.67608
4	nontargeting_mHTT	0.954238	1.82304	35.6351	27.258	1	0.149796	0.446139	2.97005	0.987497
5	nontargeting_mHTT	1.07896	2.32703	39.5967	30.178	1	0.123009	0.27784	0.795629	0.170106
