# Supplementary material for: Downregulation of glial genes involved in synaptic function mitigates Huntington's disease pathogenesis
Source: eLife. 2021 Apr 19;10:e64564. doi: 10.7554/eLife.64564 (PMC8149125; doi:10.7554/eLife.64564)
Supplement: Figure 6—source data 2. [file elife-64564-fig6-data2.xlsx]

## Sheet: Sheet1
Normalized data to mHTT control
Genotype	Normalized Ratio (mab5490/tubulin)	Experiment
mHTT/Spn42De-hpRNA (VDRC: 102622)	0.561961	Gel A 05/23/2019
mHTT/Spn42De-hpRNA (VDRC: 102622)	0.340123	Gel B 05/23/2019
mHTT/Spn42De-hpRNA (VDRC: 102622)	0.702154	Gel A 05/26/2019
mHTT/Spn42De-hpRNA (VDRC: 102622)	0.779171	Gel A 06/03/2019
mHTT/Spn42De-hpRNA (VDRC: 102622)	0.521777	Gel B 06/03/2019
	Average	SEM
	0.581037	0.0761057
Raw data by experiment
Gel A 05/23/2019
Genotype	mab5490	Tubulin	Ratio	Normalized to control
mHTT/Non-targeting hpRNA (VDRC: 13974)	166	5480	0.030292	1
mHTT/Spn42De-hpRNA (VDRC: 102622)	223	13100	0.0170229	0.561961
Gel B 05/23/2019
Genotype	mab5490	Tubulin	Ratio	Normalized to control
mHTT/Non-targeting hpRNA (VDRC: 13974)	153	3230	0.0473684	1
mHTT/Spn42De-hpRNA (VDRC: 102622)	174	10800	0.0161111	0.340123
Gel A 05/26/2019
Genotype	mab5490	Tubulin	Ratio	Normalized to control
mHTT/Non-targeting hpRNA (VDRC: 13974)	155	4400	0.0352273	1
mHTT/Spn42De-hpRNA (VDRC: 102622)	70	2830	0.024735	0.702154
Gel A 06/03/2019
Genotype	mab5490	Tubulin	Ratio	Normalized to control
mHTT/Non-targeting hpRNA (VDRC: 13974)	257	55300	0.00464738	1
mHTT/Spn42De-hpRNA (VDRC: 102622)	151	41700	0.0036211	0.779171
Gel B 06/03/2019
Genotype	mab5490	Tubulin	Ratio	Normalized to control
mHTT/Non-targeting hpRNA (VDRC: 13974)	353	50800	0.00694882	1
mHTT/Spn42De-hpRNA (VDRC: 102622)	124	34200	0.00362573	0.521777
