# Supplementary material for: Downregulation of glial genes involved in synaptic function mitigates Huntington's disease pathogenesis
Source: eLife. 2021 Apr 19;10:e64564. doi: 10.7554/eLife.64564 (PMC8149125; doi:10.7554/eLife.64564)
Supplement: Figure 6—source data 3. [file elife-64564-fig6-data3.xlsx]

## Sheet: Numerical Summary
NC	Htt	Serpina1a
0.987335	0.384816	0.848392
0.86029	0.359053	0.813359
0.94484	0.399357	0.810422
1.06805	0.292363	0.879393
0.911696	0.193058	0.91791
1.01634	0.253645	0.753765
1.0478	0.349077	0.82871
1.21154	0.280612	0.805874
0.952101	0.511065	0.623882
	Average	SE
NC	1	0.034308
Htt	0.335894	0.0311658
Serpina1a	0.809079	0.0279153

## Sheet: Raw Data
665nm/615nm
	NC	Htt	Serpina1a	blank
	0.357361	0.235294	0.331902	0.153939
	0.332344	0.23045	0.324925	0.18007	Average Blank
	0.348993	0.238028	0.32434	0.157795	0.162942
	0.36347	0.218512	0.333536	0.179608
	0.334114	0.199637	0.341008	0.161783
	0.35376	0.211153	0.309166	0.164458
	0.340331	0.222293	0.32404	0.151303
	0.368051	0.210652	0.3196	0.161408
	0.324129	0.249834	0.284222	0.156116
Subtract blank mean	0.194419	0.0723519	0.16896
	0.169402	0.067508	0.161983
	0.186051	0.0750859	0.161398
	0.200528	0.0555698	0.170594
	0.171171	0.0366948	0.178066
	0.190818	0.0482106	0.146223
	0.177389	0.0593507	0.161097
	0.205109	0.0477101	0.156658
	0.161187	0.0868921	0.12128
picogreen
	51698428	51956270	58875175	13674998
	68900915	62614118	59775743	18500170
	56289027	56292264	59754848	13238238	Average Blank
	51970940	51287608	59267488	13555817	1.45024e+07
	65696683	55984675	57546761	13659812
	53014497	64981911	58094735	17585748
	48613360	54511322	57651721	13676908
	53131074	53105748	57222244	13471582
	56437307	51056393	60309291	13158467
Subtract blank mean	3.7196e+07	3.74539e+07	4.43728e+07
	5.43985e+07	4.81117e+07	4.52733e+07
	4.17866e+07	4.17898e+07	4.52524e+07
	3.74685e+07	3.67852e+07	4.47651e+07
	5.11943e+07	4.14823e+07	4.30443e+07
	3.85121e+07	5.04795e+07	4.35923e+07
	3.41109e+07	4.00089e+07	4.31493e+07
	3.86287e+07	3.86033e+07	4.27198e+07
	4.19349e+07	3.6554e+07	4.58069e+07
Average(technological repeats)	4.44604e+07	4.24518e+07	4.49662e+07
	4.23916e+07	4.29156e+07	4.38006e+07
	3.82248e+07	3.83887e+07	4.3892e+07
（665/615）/picogreen
	4.37286e-09	1.70433e-09	3.75748e-09
	3.81018e-09	1.59023e-09	3.60232e-09
	4.18465e-09	1.76873e-09	3.58932e-09
	4.73036e-09	1.29486e-09	3.89479e-09
	4.03786e-09	8.55044e-10	4.06538e-09
	4.50132e-09	1.12338e-09	3.33839e-09
	4.64066e-09	1.54605e-09	3.67031e-09
	5.36585e-09	1.24281e-09	3.56918e-09
	4.2168e-09	2.26348e-09	2.76314e-09
	4.42895e-09
normalization
	0.987335	0.384816	0.848392
	0.86029	0.359053	0.813359
	0.94484	0.399357	0.810422
	1.06805	0.292363	0.879393
	0.911696	0.193058	0.91791
	1.01634	0.253645	0.753765
	1.0478	0.349077	0.82871
	1.21154	0.280612	0.805874
	0.952101	0.511065	0.623882
