# Supplementary material for: Downregulation of glial genes involved in synaptic function mitigates Huntington's disease pathogenesis
Source: eLife. 2021 Apr 19;10:e64564. doi: 10.7554/eLife.64564 (PMC8149125; doi:10.7554/eLife.64564)
Supplement: Supplementary file 1. [file elife-64564-supp1.xlsx]

## Sheet: Upregulated Conserved HD DEG
Human (Entrez ID)	Mouse (Entrez ID)	Drosophila (FlyBase ID)
[3075, 7852, 55366, 80975, 4179, 58494, 57480, 23705, 10418, 182, 2260, 2261.0, 2263, 389337, 23418, 57580, 57556, 1284, 10507, 91404, 1298, 7450, 9499, 284, 25891, 9510, 3371, 85301, 3977, 256364, 25992, 55701, 1436, 3486, 3488, 26020, 26030, 4851, 65975, 4853, 26018, 341676.0, 23022, 84466, 3572, 4604, 6653, 5648, 6678, 4638, 558, 133690, 92737, 388677, 23114, 64093, 64115, 633, 54910, 6787, 98…	[107527, 94229, 12805, 320563, 20535, 378937, 17470, 69700, 71768, 70762, 545902, 269473, 76965, 80749, 114873, 399558, 223435, 16589, 77018, 20733, 328967, 20745, 20354, 213262, 240916, 21825, 21826, 11600, 320398, 107581, 12661, 96935, 23954, 23963, 23965, 56747, 18166, 674895, 21983, 117229, 16880, 279029, 57257, 12814, 12821, 12824, 12832, 12840, 12841, 108075, 114229, 71223, 52666, 64075, 22…	['FBgn0038880', 'FBgn0036448', 'FBgn0013988', 'FBgn0053087', 'FBgn0033880', 'FBgn0052311', 'FBgn0031560', 'FBgn0000071', 'FBgn0243514', 'FBgn0004885', 'FBgn0087011', 'FBgn0034517', 'FBgn0030163', 'FBgn0000299', 'FBgn0033710', 'FBgn0004449', 'FBgn0085466', 'FBgn0037016', 'FBgn0028542', 'FBgn0005592', 'FBgn0028523', 'FBgn0028644', 'FBgn0031563', 'FBgn0000636', 'FBgn0032673', 'FBgn0259743', 'FBgn003…
[7621, 6667, 8462, 22807, 7704, 604, 339500, 7716, 22834, 7227, 84874.0, 28999, 51274, 84307.0, 6670, 360023, 7769, 55900, 9314, 1316, 64376, 10365, 7562.0, 7570, 7572, 2971, 7071, 8609, 170960.0, 138151, 285268.0]	[80902, 67370, 622675, 22344, 101023, 54201, 77652, 66596, 233057, 74149, 69228, 216177, 72306, 207259, 22654, 239652, 63872, 233410, 619665, 232854, 22689, 233890, 245671, 232875, 22701, 381359, 170936, 210105, 22431, 140482, 22724, 14025, 654801, 100515, 16597, 330788, 210853, 101604, 234725, 22751, 67143, 244216, 22779, 65020, 69930]	['FBgn0038047', 'FBgn0029173', 'FBgn0001138', 'FBgn0004618', 'FBgn0003499', 'FBgn0263115', 'FBgn0037918', 'FBgn0261434', 'FBgn0038549', 'FBgn0031610', 'FBgn0037275', 'FBgn0033252', 'FBgn0027339', 'FBgn0002985', 'FBgn0043364', 'FBgn0260243', 'FBgn0032979', 'FBgn0003507', 'FBgn0004893', 'FBgn0035357', 'FBgn0000286', 'FBgn0029939', 'FBgn0028420', 'FBgn0085405', 'FBgn0013263', 'FBgn0038548', 'FBgn008…
[60481, 6342, 84263, 56898, 2040, 51170, 79993, 10106]	[20751, 72479, 28200, 111175, 170439, 79560, 114664, 52585, 69106]	['FBgn0039030', 'FBgn0037354', 'FBgn0039040', 'FBgn0015808', 'FBgn0050008', 'FBgn0051549', 'FBgn0035588', 'FBgn0038986', 'FBgn0029994', 'FBgn0036556', 'FBgn0032715', 'FBgn0040349', 'FBgn0031630', 'FBgn0037762', 'FBgn0053110', 'FBgn0260942', 'FBgn0029648', 'FBgn0039043', 'FBgn0034382', 'FBgn0030041', 'FBgn0032910', 'FBgn0038665', 'FBgn0051548', 'FBgn0039537', 'FBgn0250821', 'FBgn0032216', 'FBgn001…
[4051]	[13075, 546726, 81906]	['FBgn0030615', 'FBgn0011576', 'FBgn0030367', 'FBgn0038037', 'FBgn0035344', 'FBgn0023541', 'FBgn0033978', 'FBgn0013771', 'FBgn0033292', 'FBgn0005670', 'FBgn0031694', 'FBgn0037601', 'FBgn0015714', 'FBgn0014469', 'FBgn0033395', 'FBgn0013773', 'FBgn0015033', 'FBgn0015040', 'FBgn0015035', 'FBgn0031693', 'FBgn0034053', 'FBgn0033397', 'FBgn0015032', 'FBgn0033981', 'FBgn0038236', 'FBgn0033979', 'FBgn001…
[57486, 6581, 6584]	[242126, 59049, 20520, 64051, 68666]	['FBgn0030331', 'FBgn0038715', 'FBgn0038407', 'FBgn0039178', 'FBgn0033809', 'FBgn0038260', 'FBgn0038262', 'FBgn0051103', 'FBgn0037144', 'FBgn0029896', 'FBgn0063649', 'FBgn0019952', 'FBgn0259164', 'FBgn0037143', 'FBgn0032879', 'FBgn0038404', 'FBgn0037140', 'FBgn0038752', 'FBgn0038938', 'FBgn0038261', 'FBgn0034479', 'FBgn0038716', 'FBgn0033778', 'FBgn0086365']
[5101, 54510, 2195]	[93888, 93890, 93891, 93892, 93893, 12563, 73173, 219257, 14107, 18526, 18530, 279653, 93873, 93874, 93876, 93875, 93878, 93880, 93881, 93883, 93884, 93886, 93887]	['FBgn0001075', 'FBgn0261574', 'FBgn0039294', 'FBgn0038247', 'FBgn0000497']
[1889]	[107522]	['FBgn0039564', 'FBgn0037230', 'FBgn0037727', 'FBgn0039611', 'FBgn0027578', 'FBgn0033742', 'FBgn0039024', 'FBgn0027528', 'FBgn0032613', 'FBgn0039613', 'FBgn0039023', 'FBgn0039612', 'FBgn0032585', 'FBgn0029769', 'FBgn0259716', 'FBgn0027570', 'FBgn0039609', 'FBgn0030425', 'FBgn0038818', 'FBgn0031805']
[7041, 9355, 3226, 9124, 7205, 4026, 5829, 5451, 5454, 5455, 5080, 64236, 10611, 8572]	[22793, 15404, 15429, 101543, 21804, 218030, 140477, 104382, 15423, 15424, 15425, 24131, 18508, 20429, 19303, 29806]	['FBgn0051481', 'FBgn0053205', 'FBgn0041789', 'FBgn0000015', 'FBgn0005561', 'FBgn0035917', 'FBgn0011642', 'FBgn0003339', 'FBgn0085354', 'FBgn0005558', 'FBgn0008651', 'FBgn0030251', 'FBgn0000014', 'FBgn0083919', 'FBgn0019650', 'FBgn0261588', 'FBgn0011701', 'FBgn0000439', 'FBgn0003944']
[7105, 967]	[12493, 74257, 70423, 232670, 12521, 56496, 22268, 109246]	['FBgn0033139', 'FBgn0029837', 'FBgn0042086', 'FBgn0033128', 'FBgn0033138', 'FBgn0036769', 'FBgn0029507', 'FBgn0029508', 'FBgn0029506', 'FBgn0031760', 'FBgn0033129', 'FBgn0020372', 'FBgn0033135', 'FBgn0033133', 'FBgn0032075', 'FBgn0033134']
[12, 5265, 710, 5104, 1992, 183, 5269]	[20716, 20713]	['FBgn0028990', 'FBgn0044011', 'FBgn0032178', 'FBgn0033115', 'FBgn0028983', 'FBgn0033574', 'FBgn0262057', 'FBgn0028988', 'FBgn0024294', 'FBgn0038299', 'FBgn0034195', 'FBgn0002930', 'FBgn0037772', 'FBgn0033112', 'FBgn0028984']
[81031, 6518]	[56017, 227659, 20527, 353169, 94043]	['FBgn0050035', 'FBgn0051100', 'FBgn0033644', 'FBgn0029932', 'FBgn0037485', 'FBgn0031520', 'FBgn0036316', 'FBgn0035178', 'FBgn0034045', 'FBgn0053281', 'FBgn0034247', 'FBgn0037386', 'FBgn0037387', 'FBgn0028562']
[5908, 51285, 6237, 22808, 8934, 2669]	[72065, 67844, 226422, 76108, 69159, 72433, 19762, 11486, 75894]	['FBgn0041191', 'FBgn0036752', 'FBgn0004636', 'FBgn0017549', 'FBgn0037326', 'FBgn0038173', 'FBgn0003205', 'FBgn0002567', 'FBgn0043025', 'FBgn0038172', 'FBgn0003206', 'FBgn0031906', 'FBgn0040513']
[948]	[12492]	['FBgn0035091', 'FBgn0035815', 'FBgn0025697', 'FBgn0031969', 'FBgn0027562', 'FBgn0260004', 'FBgn0058006', 'FBgn0010435', 'FBgn0035290', 'FBgn0035090', 'FBgn0015924', 'FBgn0002939']
[51365]	[16891, 15450, 52892]	['FBgn0030828', 'FBgn0038398', 'FBgn0029831', 'FBgn0250847', 'FBgn0004047', 'FBgn0034166', 'FBgn0004045', 'FBgn0031405', 'FBgn0032973', 'FBgn0032029', 'FBgn0030884', 'FBgn0005391']
[8777, 1739, 9231, 23513, 117583, 10083, 5996, 7082, 55227, 55914]	[17475, 74053, 56470, 73750, 210274, 13383, 246709, 105782, 243961, 71228, 53310]	['FBgn0067864', 'FBgn0001263', 'FBgn0033984', 'FBgn0001624', 'FBgn0040752', 'FBgn0259927', 'FBgn0035676', 'FBgn0263289', 'FBgn0020278', 'FBgn0087007', 'FBgn0085429', 'FBgn0026597']
[22913, 4170, 596, 666, 7073, 494115, 220988.0, 3178.0, 3181, 55544, 10492, 124540]	[17690, 21841, 51800, 71787, 70248, 19826, 54196]	['FBgn0035063', 'FBgn0005649', 'FBgn0004838', 'FBgn0004903', 'FBgn0040491', 'FBgn0004237', 'FBgn0011666', 'FBgn0040286', 'FBgn0001215', 'FBgn0005648']
[1117.0, 1116]	[57440, 50887, 71884, 98878, 56726, 106393]	['FBgn0035772', 'FBgn0020414', 'FBgn0038180', 'FBgn0035398', 'FBgn0064237', 'FBgn0013763', 'FBgn0263132', 'FBgn0020415', 'FBgn0026415', 'FBgn0038181', 'FBgn0022702']
[10049, 3300, 5611, 64215, 3337]	[76594, 30045, 57431]	['FBgn0037718', 'FBgn0037151', 'FBgn0263106', 'FBgn0036359', 'FBgn0037882', 'FBgn0031322', 'FBgn0050156', 'FBgn0260775', 'FBgn0030990', 'FBgn0030805', 'FBgn0032474']
[3306]	[73442, 110920, 15481, 15512]	['FBgn0013277', 'FBgn0051354', 'FBgn0011771', 'FBgn0013275', 'FBgn0001218', 'FBgn0013276', 'FBgn0013279', 'FBgn0001216', 'FBgn0001230', 'FBgn0013278', 'FBgn0001219']
[55349]	[218865]	['FBgn0001112', 'FBgn0030588', 'FBgn0030593', 'FBgn0030590', 'FBgn0037896', 'FBgn0030587', 'FBgn0030589', 'FBgn0039415', 'FBgn0030592', 'FBgn0030586']
[54625, 3014, 8334, 83666]	[319166, 232440, 404634, 107227]	['FBgn0053814', 'FBgn0053829', 'FBgn0053823', 'FBgn0053832', 'FBgn0053808', 'FBgn0053826', 'FBgn0042135', 'FBgn0053817', 'FBgn0053820', 'FBgn0051618']
[27303, 1994, 5939]	[15569, 70349, 15571, 11534]	['FBgn0029933', 'FBgn0052423', 'FBgn0260400', 'FBgn0008635', 'FBgn0024987', 'FBgn0010263', 'FBgn0003659', 'FBgn0011640', 'FBgn0036337', 'FBgn0086675']
[4012]	[80898, 237553, 240028]	['FBgn0263236', 'FBgn0261243', 'FBgn0036186', 'FBgn0039640', 'FBgn0052473', 'FBgn0051445', 'FBgn0039656', 'FBgn0051427', 'FBgn0039064', 'FBgn0058470']
[6535]	[240332, 232333, 103098]	['FBgn0034381', 'FBgn0035969', 'FBgn0031937', 'FBgn0027660', 'FBgn0031935', 'FBgn0031936', 'FBgn0033708', 'FBgn0029762', 'FBgn0031939']
[1512]	[13039]	['FBgn0030521', 'FBgn0260462', 'FBgn0034443', 'FBgn0033875', 'FBgn0250848', 'FBgn0037396', 'FBgn0033873', 'FBgn0033874', 'FBgn0034229']
[91526, 55367, 348094]	[14082, 69547, 68558, 19727, 73845, 24014, 21951, 117589]	['FBgn0013983', 'FBgn0011747', 'FBgn0261554', 'FBgn0038928']
[124565]	[234967]	['FBgn0032036', 'FBgn0030817', 'FBgn0036115', 'FBgn0036007', 'FBgn0035300', 'FBgn0036116', 'FBgn0030816', 'FBgn0033760']
[29965]	[66626]	['FBgn0034870', 'FBgn0050269', 'FBgn0260768', 'FBgn0050273', 'FBgn0040658', 'FBgn0034761', 'FBgn0260767', 'FBgn0034758']
[1593]	[104086]	['FBgn0053503', 'FBgn0033524', 'FBgn0038680', 'FBgn0038681', 'FBgn0033753', 'FBgn0050489', 'FBgn0003388', 'FBgn0037817']
[51776, 4067, 7525, 6503, 2534, 51479, 25]	[54721, 26409, 20779, 338372, 11736, 15239, 14360, 234878]	['FBgn0262081', 'FBgn0003502', 'FBgn0026323', 'FBgn0039955', 'FBgn0036896', 'FBgn0033049']
[23213, 2799]	[15931, 27029, 11881, 11883, 240725, 72043, 75612, 50917]	['FBgn0033763', 'FBgn0260475', 'FBgn0038660', 'FBgn0040271', 'FBgn0035445', 'FBgn0036768', 'FBgn0052187', 'FBgn0036765']
[83481, 23499.0, 2316, 79789, 23224, 6711, 667.0]	[212073, 14453, 319565, 216565, 68794, 109620]	['FBgn0261836', 'FBgn0028371', 'FBgn0034180', 'FBgn0000667', 'FBgn0029881', 'FBgn0250788', 'FBgn0013733', 'FBgn0014141']
[2180, 23205, 376497, 11000, 28965]	[50790, 433256, 26569, 26458]	['FBgn0027348', 'FBgn0050194', 'FBgn0028519', 'FBgn0039156', 'FBgn0037996', 'FBgn0038732', 'FBgn0263120', 'FBgn0036821']
[9975, 6256, 7025, 7026, 5465, 2908]	[110784, 11835, 13865, 11819, 22259, 13982, 19401, 13983]	['FBgn0015239', 'FBgn0000568', 'FBgn0260432', 'FBgn0015381', 'FBgn0261239', 'FBgn0023546']
[5927, 160335, 6674, 84899.0, 3433]	[108155, 112419, 67145, 278279, 387314, 70551, 216850]	['FBgn0260749', 'FBgn0051690', 'FBgn0032640', 'FBgn0028481', 'FBgn0034692', 'FBgn0039463', 'FBgn0036004', 'FBgn0031759']
[84188]	[330450]	['FBgn0043792', 'FBgn0034142', 'FBgn0033464', 'FBgn0039620', 'FBgn0023550', 'FBgn0038450', 'FBgn0039131']
[51478]	[17252, 105014, 77974, 71837]	['FBgn0034500', 'FBgn0033204', 'FBgn0051235', 'FBgn0050495', 'FBgn0033205', 'FBgn0038610', 'FBgn0029866']
[9588, 5052]	[53381, 21672]	['FBgn0040309', 'FBgn0033520', 'FBgn0033521', 'FBgn0031479', 'FBgn0040308', 'FBgn0038519', 'FBgn0033518']
[219681, 3728, 54963, 8502, 1500, 1501, 1499]	[12387, 11877, 68556, 67451]	['FBgn0035639', 'FBgn0260799']
[10801, 151011, 5414, 55752, 23176, 989, 4735]	[100043580]	['FBgn0259923', 'FBgn0014029']
[26084, 23048, 9322, 11252, 6453, 50618, 10276]	[27059, 24057, 56349]	['FBgn0023388', 'FBgn0035574', 'FBgn0261547', 'FBgn0010877']
[284996, 55819]	[68867, 29864, 66889, 19820, 18744, 59044, 207742]	['FBgn0037705', 'FBgn0004919', 'FBgn0026878', 'FBgn0052850', 'FBgn0037944']
[2565]	[14404, 110886, 14401, 14396, 14394, 237213]	['FBgn0030707', 'FBgn0001134', 'FBgn0036727', 'FBgn0003011', 'FBgn0033558', 'FBgn0024963', 'FBgn0036542']
[8291, 580, 148741, 26509, 26064, 55075, 65124]	[217217, 268301, 208372]	['FBgn0036302', 'FBgn0031675', 'FBgn0035934', 'FBgn0037483']
[117248, 8693, 55568, 2591]	[171212, 231050, 231605, 14426, 207839]	['FBgn0035375', 'FBgn0036529', 'FBgn0030930', 'FBgn0051776', 'FBgn0031530', 'FBgn0034025', 'FBgn0051956']
[220963, 6566]	[71781, 80879, 216867, 72472, 69309]	['FBgn0031012', 'FBgn0033657', 'FBgn0033913', 'FBgn0031002', 'FBgn0001296', 'FBgn0034063', 'FBgn0259834']
[1836]	[320718, 171429]	['FBgn0038354', 'FBgn0036770', 'FBgn0039789', 'FBgn0038337', 'FBgn0034275', 'FBgn0013953']
[37]	[229211, 11370]	['FBgn0037999', 'FBgn0035811', 'FBgn0035911', 'FBgn0036824', 'FBgn0034432', 'FBgn0038742']
[6526]	[330064, 114479]	['FBgn0039872', 'FBgn0034494', 'FBgn0038652', 'FBgn0037895', 'FBgn0031998', 'FBgn0035293']
[59271, 9289]	[237175, 99633]	['FBgn0039821', 'FBgn0033313', 'FBgn0028956', 'FBgn0034219', 'FBgn0035623', 'FBgn0023000']
[84617]	[71924, 22153, 22154, 22151, 227613, 67951]	['FBgn0003887', 'FBgn0003888', 'FBgn0003889', 'FBgn0003890']
[84288]	[69441, 77627, 12308, 214189]	['FBgn0004910', 'FBgn0000253', 'FBgn0038830', 'FBgn0031692', 'FBgn0040351', 'FBgn0010423']
[7837]	[19224]	['FBgn0004577', 'FBgn0259233', 'FBgn0039005', 'FBgn0011828', 'FBgn0038465', 'FBgn0032685']
[2289]	[66120, 14226, 338355, 14228, 14231, 231997]	['FBgn0037930', 'FBgn0034368', 'FBgn0013954', 'FBgn0013269', 'FBgn0029174']
[254956, 55213, 1102]	[226123, 94254, 59026, 27414, 378462]	['FBgn0030674', 'FBgn0037116', 'FBgn0032478', 'FBgn0036016', 'FBgn0031107', 'FBgn0087005']
[1195, 10521]	[20605, 229357, 18389, 18390, 13207, 20607]	['FBgn0037549', 'FBgn0051755', 'FBgn0259220', 'FBgn0036260', 'FBgn0035720']
[22836, 58480, 9886, 389]	[80837, 23912, 223881, 73296, 228543]	['FBgn0014380', 'FBgn0014011', 'FBgn0039532', 'FBgn0010341', 'FBgn0036980', 'FBgn0083940']
[1105, 1106, 55636]	[93761, 269610, 216848, 67772, 71389, 109151]	['FBgn0262519', 'FBgn0250786', 'FBgn0086902']
[286827, 10346.0, 23321, 4281, 81844, 10206]	[67525, 23947, 319636, 56631, 55992]	['FBgn0051721', 'FBgn0259745', 'FBgn0034412']
[55904, 29072, 2186, 58508, 51131]	[240427, 23856, 207165]	['FBgn0000541', 'FBgn0005386', 'FBgn0003862', 'FBgn0082831', 'FBgn0040022', 'FBgn0036398']
[79956]	[226090]	['FBgn0034437', 'FBgn0034439', 'FBgn0034436', 'FBgn0034438', 'FBgn0034440']
[25934]	[18082, 14467, 57028, 67078, 66536]	['FBgn0036759', 'FBgn0036760', 'FBgn0030347', 'FBgn0030724']
[306, 308, 307, 301, 302]	[11747, 11749, 11750, 71790]	['FBgn0000083', 'FBgn0030749']
[8644, 1645, 1646]	[56043, 58810]	['FBgn0086254', 'FBgn0036290', 'FBgn0035476', 'FBgn0033101', 'FBgn0027552']
[5033, 8974]	[320452, 74443]	['FBgn0039779', 'FBgn0039776', 'FBgn0026190', 'FBgn0036793', 'FBgn0042182']
[51088]	[71778, 240756, 93688, 270201, 237010]	['FBgn0034396']
[63971, 23095, 23303, 10749, 57519]	[16560, 16561, 16558]	['FBgn0034155']
[2246, 2247]	[14165, 67112, 14164, 14167, 64654]	['FBgn0014135']
[1622, 91452]	[93747, 23986]	['FBgn0010387', 'FBgn0031478', 'FBgn0031992', 'FBgn0033879', 'FBgn0037027']
[10797]	[17768, 76238]	['FBgn0051673', 'FBgn0010222', 'FBgn0037370', 'FBgn0032889', 'FBgn0020385']
[64147]	[269152, 16578, 319991, 16568, 100502766]	['FBgn0002924', 'FBgn0039925']
[27443, 29994, 11177, 8019, 6046]	[67382, 407823]	['FBgn0033636', 'FBgn0004656', 'FBgn0027620']
[9360, 4820, 5479, 10105]	[67738]	['FBgn0033089', 'FBgn0036020', 'FBgn0034753', 'FBgn0039347', 'FBgn0004432']
[23657, 8140]	[330836]	['FBgn0030574', 'FBgn0028425', 'FBgn0039487', 'FBgn0032911', 'FBgn0002778']
[19, 20]	[11305, 27403, 27404, 217258]	['FBgn0039594', 'FBgn0083956', 'FBgn0053970', 'FBgn0031734', 'FBgn0034493']
[3696, 3688, 3689, 3691, 3693]	[320910]	['FBgn0010395', 'FBgn0004657']
[79152, 9415, 3992]	[327951, 60527]	['FBgn0032652', 'FBgn0029854', 'FBgn0033189', 'FBgn0032603', 'FBgn0000406']
[51]	[80911]	['FBgn0034628', 'FBgn0027572', 'FBgn0031813', 'FBgn0034629', 'FBgn0032775']
[27031, 3831, 84334]	[16593, 16594, 66884, 102632, 74764]	['FBgn0032744', 'FBgn0010235']
[7040, 7042, 3625, 655]	[21808]	['FBgn0038191', 'FBgn0039914', 'FBgn0000490', 'FBgn0024913', 'FBgn0024234']
[11104, 55137, 79781]	[50850, 231912, 20585, 60530, 60344]	['FBgn0037375', 'FBgn0037531', 'FBgn0027605', 'FBgn0031519']
[5592, 5613]	[18749]	['FBgn0000721', 'FBgn0032187', 'FBgn0000489', 'FBgn0000442']
[3760, 3764, 3766, 3773]	[16517, 16519, 16524]	['FBgn0039060']
[8424]	[170442]	['FBgn0033830', 'FBgn0030575', 'FBgn0014903', 'FBgn0038795']
[83604, 2012, 2013, 2014]	[73893]	['FBgn0034267', 'FBgn0039014']
[467, 11016, 1385, 3725]	[12912, 81703]	['FBgn0001297', 'FBgn0001291']
[2791, 55970]	[14704, 14706, 66066, 14701]	['FBgn0028433', 'FBgn0263029']
[4086, 4087, 4090, 4093]	[17125]	['FBgn0024986', 'FBgn0020493', 'FBgn0025800']
[57628]	[213760, 269109, 235606, 13483]	['FBgn0259175', 'FBgn0032242', 'FBgn0040017']
[5364, 5365, 23654, 23129]	[140571, 18844, 18846]	['FBgn0025740']
[663]	[16467, 229589, 353211, 12175]	['FBgn0003116']
[51760, 94121]	[83671, 27359, 53420, 75697]	['FBgn0004242', 'FBgn0053555']
[1767, 201625, 56171]	[13424]	['FBgn0013811', 'FBgn0013813', 'FBgn0013812', 'FBgn0261797']
[7398]	[244144, 216825, 69727, 57775]	['FBgn0038862', 'FBgn0031187', 'FBgn0039025']
[10413]	[94253, 16396, 66894, 17999]	['FBgn0259174']
[7187]	[22032, 239618, 380918]	['FBgn0052486', 'FBgn0024997', 'FBgn0026319', 'FBgn0024728']
[3480, 3643]	[13840, 13844, 13837, 13839]	['FBgn0013984', 'FBgn0038279']
[358, 361]	[330323]	['FBgn0033635', 'FBgn0034883', 'FBgn0034885', 'FBgn0015872']
[9169]	[545389, 26913, 20168, 233208]	['FBgn0039257', 'FBgn0053113', 'FBgn0037344']
[2803, 4926]	[229841, 269682, 214552, 101706]	['FBgn0002873']
[2633.0, 2634, 2635]	[109168, 626578, 73991, 100702]	['FBgn0039213']
[81624, 114793, 23002, 23500]	[71409, 208846]	['FBgn0052138', 'FBgn0053556', 'FBgn0025641', 'FBgn0260963']
[5129, 1018]	[18557, 18647, 319887]	['FBgn0016131', 'FBgn0027507', 'FBgn0004107', 'FBgn0005640']
[1843, 85464, 6815]	[252864, 231637, 67446, 70686]	['FBgn0036844', 'FBgn0243512', 'FBgn0030976', 'FBgn0036369']
[2768, 10672, 2773, 2770]	[14678, 14682, 14677]	['FBgn0050054', 'FBgn0004435', 'FBgn0001104']
[3908, 3910, 284217]	[18209, 16773, 16782]	['FBgn0015773', 'FBgn0002526', 'FBgn0002528', 'FBgn0261563']
[11234, 3956, 3958, 9895]	[56048, 16854, 107753]	['FBgn0034365', 'FBgn0033177', 'FBgn0052226']
[8611, 8613, 8612, 196051]	[50784, 19012, 235044]	['FBgn0037166', 'FBgn0037341', 'FBgn0037163']
[8323, 6423.0, 7855]	[14370, 14371, 14362, 53419]	['FBgn0027343', 'FBgn0016797', 'FBgn0030027']
[4651, 80022, 9448, 11183]	[17921, 26921]	['FBgn0010909', 'FBgn0000317', 'FBgn0030252', 'FBgn0002938']
[169792, 84662.0, 2737, 4520]	[223921]	['FBgn0039039', 'FBgn0004859', 'FBgn0040305', 'FBgn0033782']
[79026, 113146, 26043]	[218832, 224111, 20020, 22166]	['FBgn0035334', 'FBgn0040070', 'FBgn0050069', 'FBgn0003277']
[7430, 4478, 5962, 23150]	[18016, 67313, 19684, 209630]	['FBgn0011661']
[27106, 10628, 57561, 91947]	[215705]	['FBgn0037518', 'FBgn0037856', 'FBgn0035103', 'FBgn0037465']
[123920, 54918, 4118, 5355]	[75458, 50918, 277010]	['FBgn0030234', 'FBgn0030309']
[115123, 10299, 220972]	[224703, 71779, 72925, 223455]	['FBgn0031474', 'FBgn0035983']
[5965]	[79456, 97827, 19691, 22427]	['FBgn0038608', 'FBgn0040290', 'FBgn0037901', 'FBgn0027375']
[7050]	[54352, 16372, 17268]	['FBgn0031232', 'FBgn0033748']
[7431, 2670]	[16678, 16906, 223915]	['FBgn0010397']
[329]	[11798, 11799, 217342]	['FBgn0260635', 'FBgn0037808']
[3065]	[433759, 70315, 15183]	['FBgn0015805']
[8992]	[76252]	['FBgn0028663', 'FBgn0035521', 'FBgn0028664']
[4821]	[18088, 18089, 18094]	['FBgn0261930', 'FBgn0028993']
[162073]	[239796, 214763, 242125]	['FBgn0029003', 'FBgn0035868', 'FBgn0015336']
[5154, 5228]	[22340, 54635, 18654]	['FBgn0030964']
[285195]	[236727, 236794, 331004]	['FBgn0028703', 'FBgn0026787']
[5166]	[12041, 228026, 18604]	['FBgn0017558']
[5062]	[70584, 18481, 18479]	['FBgn0044826']
[221035]	[28193, 13476, 72549]	['FBgn0261564', 'FBgn0033906']
[135152]	[76898, 280645, 72727]	['FBgn0032135', 'FBgn0036144']
[79645]	[26950, 66793, 52589]	['FBgn0013303', 'FBgn0036926']
[79443]	[12464, 17281, 12465]	['FBgn0032444', 'FBgn0010621']
[3655, 3673, 3679]	[16400, 381924, 16411]	['FBgn0003328', 'FBgn0004456']
[10123]	[217151, 320982, 75423]	['FBgn0010348']
[51114]	[69035, 75965, 332175]	['FBgn0034729']
[57713]	[353282, 268297, 107815]	['FBgn0003334', 'FBgn0004861']
[51056]	[228961]	['FBgn0040493', 'FBgn0000454', 'FBgn0035915']
[123041]	[94249]	['FBgn0040030', 'FBgn0037238', 'FBgn0028704']
[347]	[11815]	['FBgn0030334', 'FBgn0033799', 'FBgn0053126']
[57153, 23446, 126969]	[242259, 70129]	['FBgn0035523']
[8673, 10791, 9341]	[317717]	['FBgn0260855', 'FBgn0003660']
[7323]	[22194, 67196, 22193]	['FBgn0011217']
[6773, 6774]	[20851, 20852, 20846]	['FBgn0016917']
[9745, 26137, 6239]	[69890]	['FBgn0003053', 'FBgn0005630']
[54454]	[320817, 67459, 269523]	['FBgn0261014']
[824, 825]	[12337, 60594, 12339]	['FBgn0012051']
[84333]	[71041, 19821, 12151]	['FBgn0005624', 'FBgn0034312']
[10016]	[109552, 227960, 12336]	['FBgn0086378']
[63827, 1462, 81035]	[665180]	['FBgn0261258', 'FBgn0040092', 'FBgn0035199']
[5305]	[19185, 18719]	['FBgn0015283', 'FBgn0016984', 'FBgn0039924']
[8837]	[18611, 12367]	['FBgn0033051', 'FBgn0020381', 'FBgn0019972']
[7461, 57698]	[269713, 13191, 76686]	['FBgn0053111', 'FBgn0020503']
[85440, 23348, 81704]	[105445, 75974]	['FBgn0031216', 'FBgn0260486']
[23250, 5205]	[319767, 231287, 320940]	['FBgn0037989', 'FBgn0032120']
[3280, 79365, 55502]	[55927]	['FBgn0259938', 'FBgn0001168', 'FBgn0032741']
[10840, 216, 223]	[69748, 72535]	['FBgn0032945', 'FBgn0051075', 'FBgn0012036']
[10114, 204851, 28996]	[15258, 15259]	['FBgn0016930', 'FBgn0027101', 'FBgn0259168']
[7076.0, 7077, 7078]	[21858]	['FBgn0025879']
[5872, 9364, 4218]	[19337, 442827, 19324]	['FBgn0015789', 'FBgn0016700', 'FBgn0262518']
[10362, 3148]	[244579, 252838, 269389]	['FBgn0004362', 'FBgn0011764', 'FBgn0035238']
[64114]	[72393]	['FBgn0013305', 'FBgn0053673', 'FBgn0025692']
[5970]	[19698]	['FBgn0260632', 'FBgn0014018', 'FBgn0011274']
[7779]	[226781]	['FBgn0037000', 'FBgn0037875', 'FBgn0025693']
[10180, 6651]	[67769, 20658]	['FBgn0031319', 'FBgn0034002', 'FBgn0031318']
[8407, 6876, 8826]	[56370]	['FBgn0002789', 'FBgn0038774', 'FBgn0035499']
[1396, 1465, 1466]	[65970]	['FBgn0250819', 'FBgn0014863', 'FBgn0259209']
[7514]	[74204, 72322, 103573]	['FBgn0020497']
[29896, 9667, 79811]	[101214]	['FBgn0039229']
[9759]	[56233, 15185, 208727]	['FBgn0026428']
[29954]	[99011, 217734, 20316]	['FBgn0003292', 'FBgn0086368', 'FBgn0037312']
[1573, 1545, 113612]	[242546]	['FBgn0010383', 'FBgn0086917', 'FBgn0036910']
[2113, 2004, 2005]	[23872, 14009]	['FBgn0005660', 'FBgn0003118']
[55268]	[76976, 76219, 52430]	['FBgn0039172', 'FBgn0039531', 'FBgn0033761']
[64067, 64344]	[20464, 27386]	['FBgn0262139', 'FBgn0004666', 'FBgn0015542']
[253827]	[27361, 76467, 320183]	['FBgn0037847']
[85315, 79602, 79957]	[76498]	['FBgn0038256', 'FBgn0038984', 'FBgn0053203']
[5586, 5578]	[330503, 18761, 72508]	['FBgn0259680', 'FBgn0004462']
[22821, 10156]	[19414, 19415, 18015]	['FBgn0015269', 'FBgn0004390']
[10397, 57447]	[29812]	['FBgn0043070']
[140890, 9295]	[69207]	['FBgn0024285']
[2017, 3059]	[13043]	['FBgn0025865']
[477]	[192113, 232975]	['FBgn0002921']
[26207]	[18739]	['FBgn0027872', 'FBgn0262468']
[11014]	[66913, 68137]	['FBgn0022268']
[4670]	[100041480, 17876]	['FBgn0260010']
[80705]	[16328, 381644]	['FBgn0036480', 'FBgn0039152']
[10746]	[232944, 108079]	['FBgn0023169', 'FBgn0260934']
[6767]	[19060]	['FBgn0260484', 'FBgn0005777']
[463]	[11906, 80892]	['FBgn0004607']
[1806]	[99586]	['FBgn0036663', 'FBgn0086450']
[8773]	[67826]	['FBgn0011288', 'FBgn0028401']
[55616, 23527]	[230837]	['FBgn0050372', 'FBgn0039056']
[28232, 28231]	[227394]	['FBgn0051634', 'FBgn0032123']
[59345]	[14696, 14688]	['FBgn0001105', 'FBgn0004623']
[25840]	[67044]	['FBgn0037890', 'FBgn0033519']
[1069, 1070]	[26370]	['FBgn0261804']
[9873]	[319262]	['FBgn0035966', 'FBgn0035967']
[2171, 5375]	[12140, 14077]	['FBgn0037913']
[2239]	[14733, 71951]	['FBgn0041604']
[30]	[110446]	['FBgn0040064', 'FBgn0029969']
[26118, 146845]	[78889]	['FBgn0035724', 'FBgn0034527']
[117]	[54598, 319229]	['FBgn0260753']
[5208, 5209]	[270198]	['FBgn0027621']
[5934]	[19650, 19651]	['FBgn0015799']
[6652]	[20322]	['FBgn0024289', 'FBgn0022359']
[9043]	[70834, 30957]	['FBgn0024187']
[196527]	[320091]	['FBgn0030349', 'FBgn0038721']
[122060, 57606]	[75991]	['FBgn0037811']
[3996]	[78808]	['FBgn0030412', 'FBgn0002121']
[8349]	[319181]	['FBgn0053908', 'FBgn0061209']
[23603]	[12721, 23790]	['FBgn0033109']
[2778]	[14683]	['FBgn0001123', 'FBgn0010223']
[79877]	[68087]	['FBgn0035632', 'FBgn0037469']
[6654]	[20662, 20663]	['FBgn0001965']
[6426]	[67996]	['FBgn0004587', 'FBgn0040284']
[6814]	[20910, 20911]	['FBgn0004574']
[5825]	[26874]	['FBgn0039890', 'FBgn0031069']
[10519]	[70261, 56398]	['FBgn0015614']
[9411]	[71544, 71302]	['FBgn0030685']
[5293]	[18707, 30955]	['FBgn0015279']
[55740]	[13800, 22323]	['FBgn0025643']
[5286]	[18704, 18705]	['FBgn0015278']
[51704]	[14823]	['FBgn0019985', 'FBgn0000206']
[26027]	[56360, 70025]	['FBgn0039856']
[1488, 26227]	[13016]	['FBgn0032350']
[4637.0]	[216459]	['FBgn0004687', 'FBgn0250904']
[29927]	[57743, 107652]	['FBgn0086357']
[8780]	[71340]	['FBgn0036187', 'FBgn0031643']
[4814]	[18081]	['FBgn0036101', 'FBgn0038079']
[10215]	[50913, 50914]	['FBgn0263118']
[5358]	[102866, 18826]	['FBgn0024238']
[9819, 81628]	[72033]	['FBgn0259176']
[1942]	[13640, 13641]	['FBgn0040324']
[11031]	[216344, 19334]	['FBgn0014010']
[83871]	[19376, 19346]	['FBgn0015797']
[8800]	[18632]	['FBgn0053474', 'FBgn0034058']
[8531]	[52502, 380669]	['FBgn0036661']
[5891, 4117]	[56542]	['FBgn0259713']
[5224]	[18648, 12183]	['FBgn0014869']
[8880, 8939]	[51886]	['FBgn0014870']
[4487]	[13392]	['FBgn0038833', 'FBgn0000492']
[54443]	[68743]	['FBgn0261385', 'FBgn0050183']
[5978]	[22722]	['FBgn0262160', 'FBgn0263072']
[8878]	[18412]	['FBgn0036558', 'FBgn0003231']
[3189]	[56258]	['FBgn0023441', 'FBgn0259139']
[4057, 7018]	[20818]	['FBgn0022355', 'FBgn0036299']
[84002]	[26878, 26879]	['FBgn0040373', 'FBgn0000221']
[9026, 3092]	[29816]	['FBgn0036309', 'FBgn0036992']
[11100]	[84585, 67610]	['FBgn0038296', 'FBgn0050122']
[54498, 4129]	[212503, 99982]	['FBgn0036749']
[65059, 54518]	[50915, 77300]	['FBgn0261811']
[85439, 11037]	[83602]	['FBgn0016975', 'FBgn0052432']
[83733.0, 10165]	[50799, 71803]	['FBgn0028646']
[81542]	[67988, 52837]	['FBgn0036579', 'FBgn0034914']
[4643]	[17913, 71602]	['FBgn0086347', 'FBgn0010246']
[51747]	[66978, 67684]	['FBgn0029887', 'FBgn0036734']
[10274, 10735]	[20843]	['FBgn0043865', 'FBgn0020616']
[57409]	[69674, 269037]	['FBgn0032156', 'FBgn0034181']
[114885]	[79196, 74486]	['FBgn0033463', 'FBgn0035181']
[57186, 57568]	[56784, 99326]	['FBgn0039466']
[57584, 394]	[56070, 232906]	['FBgn0026375', 'FBgn0261641']
[4124]	[17160, 17159]	['FBgn0032253', 'FBgn0027611']
[51429, 112574]	[56440, 67804]	['FBgn0040475']
[818, 8573]	[108058]	['FBgn0004624', 'FBgn0250785']
[23328, 3636]	[16330]	['FBgn0030761', 'FBgn0263117']
[10434]	[18777, 26394]	['FBgn0042138', 'FBgn0037842']
[822, 2934]	[22351]	['FBgn0010225', 'FBgn0003187']
[2549, 9846]	[226245, 14389]	['FBgn0016794']
[397]	[14570]	['FBgn0036921']
[54469]	[65098]	['FBgn0053936']
[347862]	[213350]	['FBgn0039802']
[6303]	[69215]	['FBgn0038302']
[9725]	[224807]	['FBgn0033259']
[7813]	[57915]	['FBgn0262740']
[54888]	[72181]	['FBgn0026079']
[22906]	[70827]	['FBgn0262872']
[9948]	[22388]	['FBgn0260049']
[85463]	[219094]	['FBgn0259742']
[57045]	[65960]	['FBgn0000394']
[57088]	[70310]	['FBgn0052056']
[9454]	[26557]	['FBgn0025777']
[493]	[381290]	['FBgn0259214']
[85445]	[620292]	['FBgn0013997']
[5130]	[236899]	['FBgn0041342']
[23471]	[72265]	['FBgn0040340']
[56987]	[70508]	['FBgn0024251']
[56254]	[668173]	['FBgn0035233']
[8844]	[16706]	['FBgn0015402']
[79832]	[99003]	['FBgn0036958']
[274]	[218038]	['FBgn0027356']
[93643]	[380785]	['FBgn0259224']
[133015]	[69310]	['FBgn0034454']
[130814]	[217430]	['FBgn0031662']
[8405]	[217194]	['FBgn0030961']
[151636]	[14357]	['FBgn0000524']
[79778]	[67254]	['FBgn0036333']
[56907]	[234857]	['FBgn0003475']
[84080]	[102124]	['FBgn0033174']
[32]	[107476]	['FBgn0033246']
[8659]	[69478]	['FBgn0083984']
[57475]	[213556]	['FBgn0259100']
[9261]	[17164]	['FBgn0013987']
[205428]	[68861]	['FBgn0034705']
[6238]	[81910]	['FBgn0038535']
[636]	[12121]	['FBgn0000183']
[165324]	[386649]	['FBgn0259729']
[83876]	[71263]	['FBgn0040236']
[8938]	[545192]	['FBgn0085378']
[93663]	[50768]	['FBgn0039994']
[4780]	[18025]	['FBgn0262975']
[54893]	[54384]	['FBgn0028497']
[860]	[12393]	['FBgn0002576']
[25796]	[66171]	['FBgn0030239']
[55916]	[237082]	['FBgn0028411']
[1756]	[13405]	['FBgn0260003']
[51071]	[232449]	['FBgn0033735']
[54165]	[100737]	['FBgn0036967']
[55023]	[83946]	['FBgn0011785']
[23344]	[18783]	['FBgn0039208']
[5125]	[18548]	['FBgn0004598']
[5696]	[19173]	['FBgn0029134']
[92565]	[66930]	['FBgn0037229']
[6117]	[68275]	['FBgn0010173']
[26135]	[66870]	['FBgn0046214']
[2098]	[51938]	['FBgn0038771']
[7756]	[22680]	['FBgn0032600']
[374618]	[21778]	['FBgn0069913']
[57471]	[66244]	['FBgn0259152']
[8908]	[27357]	['FBgn0034603']
[6507]	[20513]	['FBgn0026438']
[4147]	[17181]	['FBgn0036225']
[58533]	[72183]	['FBgn0032005']
[829]	[12340]	['FBgn0034577']
[56910]	[99138]	['FBgn0032513']
[8073]	[19245]	['FBgn0024734']
[5756]	[19230]	['FBgn0038206']
[51555]	[19305]	['FBgn0023516']
[10095]	[11867]	['FBgn0001961']
[85461]	[66860]	['FBgn0041096']
[25836]	[71175]	['FBgn0026401']
[6648]	[20656]	['FBgn0010213']
[5980]	[245555]	['FBgn0002891']
[284058]	[76719]	['FBgn0262527']
[23111]	[229285]	['FBgn0037265']
[2876]	[14775]	['FBgn0035438']
[6625]	[20637]	['FBgn0016978']
[6764]	[227801]	['FBgn0027561']
[6468]	[30838]	['FBgn0053969']
[29968]	[107272]	['FBgn0014427']
[79841]	[78933]	['FBgn0051019']
[55186]	[192287]	['FBgn0031359']
[23239]	[244650]	['FBgn0038504']
[1073]	[56431]	['FBgn0011726']
[8660]	[16370]	['FBgn0024248']
[130872]	[268390]	['FBgn0032961']
[23406]	[72042]	['FBgn0030955']
[6232]	[57294]	['FBgn0039300']
[57551]	[330177]	['FBgn0031030']
[57458]	[319880]	['FBgn0037443']
[22837]	[319876]	['FBgn0003159']
[55893]	[170753]	['FBgn0263097']
[79901]	[13056]	['FBgn0261673']
[64778]	[319448]	['FBgn0259735']
[163175]	[56839]	['FBgn0035575']
[]	[]	['FBgn0086691']
[]	[353237]	[]
[]	[320145]	[]
[]	[353235]	[]
[]	[]	['FBgn0015622']
[]	[353234]	[]
[]	[]	['FBgn0037097']
[]	[]	['FBgn0052687']
[]	[]	['FBgn0026566']
[]	[69790]	[]
[]	[]	['FBgn0035235']
[7942]	[]	[]
[]	[67063]	[]
[]	[107173]	[]
[]	[72865]	[]
[9139]	[]	[]
[]	[]	['FBgn0011760']
[]	[320302]	[]
[]	[]	['FBgn0031535']
[]	[320473]	[]
[]	[53357]	[]
[]	[434778]	[]
[]	[320557]	[]
[]	[]	['FBgn0032221']
[]	[320095]	[]
[]	[74337]	[]
[9659]	[]	[]
[]	[53424]	[]
[]	[]	['FBgn0052112']
[9244]	[]	[]
[]	[55936]	[]
[]	[320100]	[]
[]	[]	['FBgn0042119']
[342908]	[]	[]
[]	[74777]	[]
[]	[]	['FBgn0039110']
[116154]	[]	[]
[]	[11764]	[]
[]	[]	['FBgn0086129']
[]	[]	['FBgn0031717']
[]	[]	['FBgn0028427']
[]	[74355]	[]
[221749]	[]	[]
[]	[74356]	[]
[]	[74359]	[]
[9023]	[]	[]
[]	[105298]	[]
[]	[239099]	[]
[9130]	[]	[]
[]	[353242]	[]
[]	[74412]	[]
[]	[]	['FBgn0040255']
[]	[74414]	[]
[]	[]	['FBgn0026593']
[]	[]	['FBgn0036745']
[]	[17874]	[]
[]	[74478]	[]
[]	[107250]	[]
[6299]	[]	[]
[]	[74492]	[]
[]	[75221]	[]
[]	[58205]	[]
[]	[]	['FBgn0037912']
[]	[]	['FBgn0011705']
[282809]	[]	[]
[]	[]	['FBgn0034350']
[113452]	[]	[]
[]	[]	['FBgn0052755']
[]	[]	['FBgn0037094']
[]	[58193]	[]
[]	[12418]	[]
[]	[]	['FBgn0010409']
[]	[]	['FBgn0030289']
[]	[320277]	[]
[]	[]	['FBgn0033725']
[]	[]	['FBgn0260444']
[]	[]	['FBgn0011708']
[]	[]	['FBgn0024945']
[]	[]	['FBgn0031888']
[]	[]	['FBgn0004395']
[]	[]	['FBgn0031995']
[]	[107242]	[]
[]	[]	['FBgn0029664']
[]	[72477]	[]
[]	[58206]	[]
[]	[]	['FBgn0028695']
[]	[]	['FBgn0040260']
[]	[327826]	[]
[]	[]	['FBgn0033476']
[6850]	[]	[]
[]	[107197]	[]
[]	[353172]	[]
[]	[]	['FBgn0033691']
[]	[320394]	[]
[]	[]	['FBgn0033686']
[]	[58248]	[]
[]	[]	['FBgn0038662']
[]	[58243]	[]
[]	[58242]	[]
[]	[58239]	[]
[9705]	[]	[]
[]	[74440]	[]
[8905]	[]	[]
[]	[320365]	[]
[]	[320204]	[]
[]	[320208]	[]
[]	[]	['FBgn0011674']
[]	[83430]	[]
[]	[]	['FBgn0003748']
[]	[]	['FBgn0027885']
[]	[]	['FBgn0031471']
[]	[320225]	[]
[]	[74325]	[]
[9644]	[]	[]
[]	[]	['FBgn0040512']
[]	[106639]	[]
[]	[]	['FBgn0033160']
[]	[]	['FBgn0020255']
[]	[]	['FBgn0032447']
[]	[]	['FBgn0035331']
[57493]	[]	[]
[]	[319634]	[]
[]	[57260]	[]
[]	[]	['FBgn0039419']
[]	[]	['FBgn0025366']
[]	[319655]	[]
[]	[]	['FBgn0032084']
[]	[]	['FBgn0014075']
[]	[73862]	[]
[]	[]	['FBgn0038315']
[]	[]	['FBgn0035780']
[]	[]	['FBgn0259937']
[]	[]	['FBgn0004465']
[]	[]	['FBgn0032222']
[57506]	[]	[]
[]	[]	['FBgn0022343']
[]	[]	['FBgn0039223']
[]	[]	['FBgn0031497']
[23187]	[]	[]
[90338]	[]	[]
[]	[319713]	[]
[]	[]	['FBgn0039930']
[8406]	[]	[]
[]	[237781]	[]
[]	[]	['FBgn0015929']
[57216]	[]	[]
[113201]	[]	[]
[]	[]	['FBgn0034221']
[375449]	[]	[]
[10529]	[]	[]
[]	[]	['FBgn0036612']
[]	[73919]	[]
[57532]	[]	[]
[]	[]	['FBgn0034137']
[]	[]	['FBgn0020660']
[]	[]	['FBgn0261394']
[]	[]	['FBgn0034688']
[]	[]	['FBgn0033730']
[]	[73844]	[]
[]	[73724]	[]
[]	[]	['FBgn0038071']
[]	[106522]	[]
[]	[319513]	[]
[]	[]	['FBgn0030960']
[]	[]	['FBgn0051728']
[5727]	[]	[]
[]	[73729]	[]
[221184]	[]	[]
[]	[]	['FBgn0053179']
[90050]	[]	[]
[]	[]	['FBgn0044048']
[23209]	[]	[]
[]	[319478]	[]
[]	[67922]	[]
[25937]	[]	[]
[]	[234865]	[]
[]	[]	['FBgn0030894']
[]	[]	['FBgn0086558']
[]	[73683]	[]
[]	[]	['FBgn0039972']
[8243]	[]	[]
[64651]	[]	[]
[]	[73667]	[]
[]	[96957]	[]
[]	[]	['FBgn0028887']
[]	[]	['FBgn0052190']
[50486]	[]	[]
[8139]	[]	[]
[]	[57439]	[]
[]	[57438]	[]
[]	[]	['FBgn0053056']
[]	[57434]	[]
[]	[11732]	[]
[]	[20492]	[]
[]	[106564]	[]
[]	[]	['FBgn0038246']
[]	[]	['FBgn0005585']
[]	[]	['FBgn0004066']
[]	[]	['FBgn0052260']
[]	[]	['FBgn0034920']
[]	[]	['FBgn0029971']
[]	[]	['FBgn0032035']
[]	[74168]	[]
[]	[74211]	[]
[]	[]	['FBgn0050169']
[]	[]	['FBgn0001222']
[]	[238037]	[]
[]	[319944]	[]
[]	[]	['FBgn0030481']
[]	[]	['FBgn0029849']
[8459]	[]	[]
[]	[319924]	[]
[]	[]	['FBgn0034187']
[8621]	[]	[]
[]	[237988]	[]
[]	[319901]	[]
[]	[74140]	[]
[]	[57754]	[]
[]	[241732]	[]
[]	[74133]	[]
[]	[]	['FBgn0032136']
[]	[]	['FBgn0037874']
[]	[]	['FBgn0033543']
[]	[]	['FBgn0034225']
[]	[]	['FBgn0033302']
[]	[]	['FBgn0020249']
[]	[]	['FBgn0037749']
[]	[17846]	[]
[]	[]	['FBgn0002931']
[26036]	[]	[]
[]	[320051]	[]
[]	[]	['FBgn0034645']
[]	[57895]	[]
[]	[]	['FBgn0040257']
[]	[]	['FBgn0031373']
[6917]	[]	[]
[116496]	[]	[]
[]	[320024]	[]
[]	[]	['FBgn0015570']
[]	[74254]	[]
[]	[434156]	[]
[]	[]	['FBgn0036942']
[57728]	[]	[]
[]	[]	['FBgn0029503']
[]	[]	['FBgn0051760']
[8481]	[]	[]
[]	[]	['FBgn0038893']
[57645]	[]	[]
[]	[]	['FBgn0030478']
[]	[]	['FBgn0085481']
[389084]	[]	[]
[]	[432779]	[]
[]	[]	['FBgn0000536']
[]	[]	['FBgn0030327']
[]	[]	['FBgn0260745']
[]	[74098]	[]
[]	[]	['FBgn0031632']
[]	[]	['FBgn0028342']
[]	[73998]	[]
[]	[]	['FBgn0040396']
[8460]	[]	[]
[]	[71750]	[]
[57587]	[]	[]
[]	[]	['FBgn0039282']
[8500]	[]	[]
[]	[319266]	[]
[]	[]	['FBgn0032456']
[54940]	[]	[]
[]	[69693]	[]
[]	[]	['FBgn0000392']
[8555]	[]	[]
[]	[]	['FBgn0038462']
[8544]	[]	[]
[8537]	[]	[]
[]	[270086]	[]
[]	[319832]	[]
[]	[270669]	[]
[]	[]	['FBgn0037728']
[]	[629378]	[]
[]	[]	['FBgn0050392']
[]	[237339]	[]
[57674]	[]	[]
[]	[74051]	[]
[]	[]	['FBgn0033943']
[57120]	[]	[]
[]	[107566]	[]
[]	[]	['FBgn0039303']
[]	[]	['FBgn0026409']
[]	[]	['FBgn0038733']
[219654]	[]	[]
[]	[]	['FBgn0036277']
[]	[436090]	[]
[]	[]	['FBgn0053833']
[]	[]	['FBgn0036939']
[]	[75624]	[]
[]	[75607]	[]
[]	[75416]	[]
[]	[75604]	[]
[]	[26450]	[]
[26472]	[]	[]
[]	[]	['FBgn0042179']
[]	[]	['FBgn0039255']
[]	[]	['FBgn0033607']
[26511]	[]	[]
[]	[]	['FBgn0031417']
[25976]	[]	[]
[10186]	[]	[]
[255967]	[]	[]
[]	[75736]	[]
[]	[75734]	[]
[]	[75731]	[]
[]	[]	['FBgn0017482']
[]	[]	['FBgn0032638']
[]	[75718]	[]
[10163]	[]	[]
[]	[75717]	[]
[]	[381259]	[]
[]	[239552]	[]
[]	[239546]	[]
[]	[]	['FBgn0043783']
[]	[75422]	[]
[]	[]	['FBgn0261386']
[10042]	[]	[]
[]	[272359]	[]
[]	[]	['FBgn0034076']
[7122]	[]	[]
[]	[]	['FBgn0031959']
[]	[239336]	[]
[]	[72657]	[]
[]	[59003]	[]
[]	[]	['FBgn0015623']
[9849]	[]	[]
[]	[]	['FBgn0037672']
[]	[69923]	[]
[1654]	[]	[]
[9924]	[]	[]
[]	[69617]	[]
[]	[12576]	[]
[]	[]	['FBgn0003448']
[]	[69928]	[]
[]	[]	['FBgn0038389']
[]	[]	['FBgn0261575']
[10009]	[]	[]
[]	[239408]	[]
[]	[26414]	[]
[]	[75565]	[]
[]	[26412]	[]
[]	[]	['FBgn0016726']
[]	[]	['FBgn0001092']
[]	[75538]	[]
[]	[]	['FBgn0050410']
[]	[]	['FBgn0032833']
[]	[26383]	[]
[]	[56279]	[]
[]	[]	['FBgn0037539']
[]	[]	['FBgn0033062']
[]	[]	['FBgn0030318']
[]	[75746]	[]
[]	[]	['FBgn0036254']
[]	[]	['FBgn0022772']
[]	[]	['FBgn0031228']
[9940]	[]	[]
[]	[]	['FBgn0039562']
[]	[]	['FBgn0033698']
[]	[]	['FBgn0030584']
[]	[239827]	[]
[]	[]	['FBgn0035348']
[]	[]	['FBgn0023489']
[]	[]	['FBgn0037973']
[]	[]	['FBgn0085201']
[]	[]	['FBgn0001150']
[]	[]	['FBgn0025621']
[]	[]	['FBgn0005533']
[]	[]	['FBgn0032820']
[92344]	[]	[]
[10491]	[]	[]
[]	[]	['FBgn0021895']
[]	[]	['FBgn0031126']
[23264]	[]	[]
[]	[]	['FBgn0030949']
[]	[108853]	[]
[]	[]	['FBgn0034786']
[]	[26926]	[]
[]	[26920]	[]
[]	[108837]	[]
[]	[]	['FBgn0019936']
[]	[]	['FBgn0031635']
[]	[]	['FBgn0261393']
[]	[26896]	[]
[]	[]	['FBgn0035286']
[92597]	[]	[]
[]	[26886]	[]
[]	[67286]	[]
[]	[]	['FBgn0000307']
[26147]	[]	[]
[]	[72701]	[]
[10268]	[]	[]
[]	[]	['FBgn0028336']
[10278]	[]	[]
[]	[]	['FBgn0029689']
[]	[239650]	[]
[]	[]	['FBgn0000447']
[]	[22710]	[]
[]	[223255]	[]
[387119]	[]	[]
[]	[]	['FBgn0038676']
[]	[]	['FBgn0035876']
[]	[]	['FBgn0085484']
[]	[75778]	[]
[80896]	[]	[]
[]	[]	['FBgn0021847']
[]	[]	['FBgn0024252']
[1717]	[]	[]
[10404]	[]	[]
[]	[26757]	[]
[]	[]	['FBgn0011455']
[]	[]	['FBgn0030026']
[]	[]	['FBgn0039828']
[]	[75914]	[]
[]	[20844]	[]
[]	[108679]	[]
[]	[108670]	[]
[]	[]	['FBgn0035131']
[]	[75901]	[]
[]	[]	['FBgn0032219']
[]	[]	['FBgn0030605']
[10335]	[]	[]
[]	[]	['FBgn0053481']
[]	[75847]	[]
[]	[59058]	[]
[9903]	[]	[]
[6856]	[]	[]
[]	[]	['FBgn0003567']
[]	[97159]	[]
[25897]	[]	[]
[]	[320808]	[]
[]	[]	['FBgn0041188']
[25890]	[]	[]
[]	[]	['FBgn0037447']
[]	[320782]	[]
[]	[]	['FBgn0035422']
[]	[]	['FBgn0052409']
[]	[64384]	[]
[9469]	[]	[]
[25852]	[]	[]
[124152]	[]	[]
[]	[]	['FBgn0011481']
[255488]	[]	[]
[]	[]	['FBgn0038269']
[]	[74978]	[]
[25938]	[]	[]
[]	[271711]	[]
[10160]	[]	[]
[]	[]	['FBgn0031996']
[]	[75099]	[]
[]	[]	['FBgn0027581']
[]	[140630]	[]
[25936]	[]	[]
[]	[320827]	[]
[25932]	[]	[]
[9546]	[]	[]
[]	[]	['FBgn0022361']
[]	[]	['FBgn0024897']
[]	[239157]	[]
[]	[]	['FBgn0040773']
[]	[]	['FBgn0023507']
[]	[17957]	[]
[25959]	[]	[]
[58476]	[]	[]
[255119]	[]	[]
[857]	[]	[]
[4289]	[]	[]
[342926]	[]	[]
[]	[]	['FBgn0035078']
[]	[]	['FBgn0020910']
[]	[320615]	[]
[]	[58521]	[]
[]	[]	['FBgn0038168']
[26127]	[]	[]
[]	[]	['FBgn0035228']
[]	[107607]	[]
[]	[238673]	[]
[]	[]	['FBgn0016119']
[]	[20675]	[]
[]	[58523]	[]
[]	[353502]	[]
[25802]	[]	[]
[]	[320727]	[]
[6282]	[]	[]
[]	[17955]	[]
[]	[320722]	[]
[25805]	[]	[]
[]	[107723]	[]
[]	[320709]	[]
[]	[]	['FBgn0052163']
[]	[140484]	[]
[]	[]	['FBgn0028582']
[]	[]	['FBgn0010278']
[25777]	[]	[]
[8496]	[]	[]
[]	[]	['FBgn0032904']
[]	[]	['FBgn0031589']
[]	[320873]	[]
[]	[]	['FBgn0023175']
[]	[]	['FBgn0032200']
[]	[]	['FBgn0086472']
[84249]	[]	[]
[]	[]	['FBgn0000228']
[]	[]	['FBgn0261286']
[]	[]	['FBgn0010421']
[26166]	[]	[]
[]	[]	['FBgn0034622']
[26206]	[]	[]
[]	[75304]	[]
[]	[]	['FBgn0036537']
[]	[]	['FBgn0031764']
[]	[239133]	[]
[9749]	[]	[]
[]	[]	['FBgn0086898']
[]	[]	['FBgn0000477']
[]	[386655]	[]
[]	[]	['FBgn0033093']
[]	[59032]	[]
[]	[]	['FBgn0053839']
[56262]	[]	[]
[]	[75425]	[]
[]	[]	['FBgn0040091']
[26269]	[]	[]
[]	[59036]	[]
[]	[]	['FBgn0039465']
[23241]	[]	[]
[]	[59024]	[]
[]	[59016]	[]
[]	[]	['FBgn0261530']
[]	[]	['FBgn0001091']
[]	[665211]	[]
[9848]	[]	[]
[9738]	[]	[]
[]	[]	['FBgn0053866']
[25963]	[]	[]
[9612]	[]	[]
[]	[]	['FBgn0036643']
[]	[]	['FBgn0027583']
[4336]	[]	[]
[]	[]	['FBgn0031282']
[]	[]	['FBgn0003891']
[3119]	[]	[]
[]	[664968]	[]
[389362]	[]	[]
[7412]	[]	[]
[1191]	[]	[]
[9592]	[]	[]
[]	[]	['FBgn0031048']
[]	[]	['FBgn0027655']
[]	[]	['FBgn0028662']
[]	[320938]	[]
[]	[58800]	[]
[]	[67157]	[]
[26092]	[]	[]
[]	[108030]	[]
[]	[]	['FBgn0037736']
[]	[]	['FBgn0030241']
[]	[]	['FBgn0033357']
[9710]	[]	[]
[]	[108013]	[]
[]	[]	['FBgn0026879']
[]	[]	['FBgn0033215']
[]	[320995]	[]
[64421]	[]	[]
[]	[320981]	[]
[]	[17996]	[]
[]	[]	['FBgn0261922']
[9669]	[]	[]
[]	[]	['FBgn0010433']
[7128]	[]	[]
[]	[]	['FBgn0038467']
[25853]	[]	[]
[]	[22754]	[]
[]	[71902]	[]
[]	[]	['FBgn0053139']
[]	[]	['FBgn0035557']
[]	[]	['FBgn0047114']
[118429]	[]	[]
[]	[]	['FBgn0038107']
[]	[22762]	[]
[]	[]	['FBgn0037245']
[]	[268491]	[]
[]	[268482]	[]
[]	[22717]	[]
[]	[71868]	[]
[]	[22712]	[]
[]	[71909]	[]
[]	[22763]	[]
[]	[]	['FBgn0002787']
[3799]	[]	[]
[]	[]	['FBgn0038105']
[]	[]	['FBgn0038964']
[]	[71990]	[]
[]	[71968]	[]
[]	[104732]	[]
[6414]	[]	[]
[22794]	[]	[]
[]	[268527]	[]
[]	[71941]	[]
[55553]	[]	[]
[]	[]	['FBgn0000078']
[57326]	[]	[]
[6387]	[]	[]
[6385]	[]	[]
[]	[]	['FBgn0002431']
[]	[22693]	[]
[]	[]	['FBgn0033602']
[]	[]	['FBgn0031182']
[]	[71726]	[]
[]	[]	['FBgn0031865']
[]	[194908]	[]
[]	[71718]	[]
[55331]	[]	[]
[]	[71707]	[]
[]	[235542]	[]
[]	[]	['FBgn0038789']
[]	[]	['FBgn0036891']
[]	[]	['FBgn0038946']
[]	[71691]	[]
[]	[71687]	[]
[]	[]	['FBgn0028645']
[]	[71682]	[]
[]	[]	['FBgn0035975']
[]	[235599]	[]
[]	[]	['FBgn0259984']
[]	[]	['FBgn0041629']
[]	[71835]	[]
[]	[]	['FBgn0043884']
[219287]	[]	[]
[]	[22670]	[]
[6284]	[]	[]
[6281]	[]	[]
[]	[]	['FBgn0031549']
[]	[]	['FBgn0023001']
[6275]	[]	[]
[]	[71805]	[]
[]	[22646]	[]
[]	[]	['FBgn0259173']
[]	[22637]	[]
[]	[22634]	[]
[]	[104771]	[]
[399694]	[]	[]
[]	[]	['FBgn0029826']
[]	[170460]	[]
[]	[]	['FBgn0027588']
[]	[]	['FBgn0032668']
[]	[]	['FBgn0013750']
[]	[]	['FBgn0005427']
[]	[]	['FBgn0027565']
[]	[72160]	[]
[]	[72154]	[]
[]	[]	['FBgn0052271']
[]	[]	['FBgn0032850']
[]	[]	['FBgn0032124']
[]	[14755]	[]
[]	[72137]	[]
[]	[65105]	[]
[]	[]	['FBgn0032670']
[171023]	[]	[]
[6657]	[]	[]
[]	[72128]	[]
[]	[]	['FBgn0031092']
[]	[77578]	[]
[]	[]	['FBgn0058178']
[23091]	[]	[]
[]	[]	['FBgn0032834']
[]	[]	['FBgn0011770']
[23075]	[]	[]
[]	[]	['FBgn0041712']
[6660]	[]	[]
[]	[]	['FBgn0035620']
[80301]	[]	[]
[]	[]	['FBgn0043791']
[55818]	[]	[]
[6663]	[]	[]
[]	[72198]	[]
[]	[]	['FBgn0050062']
[84939]	[]	[]
[]	[]	['FBgn0035665']
[22884]	[]	[]
[]	[72053]	[]
[]	[72050]	[]
[]	[72049]	[]
[]	[]	['FBgn0032138']
[]	[]	['FBgn0053526']
[]	[432486]	[]
[22880]	[]	[]
[]	[432508]	[]
[22879]	[]	[]
[]	[]	['FBgn0041605']
[]	[72022]	[]
[]	[]	['FBgn0030456']
[6482]	[]	[]
[]	[]	['FBgn0086909']
[]	[230991]	[]
[]	[235907]	[]
[]	[72119]	[]
[55707]	[]	[]
[55729]	[]	[]
[]	[]	['FBgn0036892']
[]	[]	['FBgn0033065']
[6563]	[]	[]
[]	[72098]	[]
[]	[217353]	[]
[]	[]	['FBgn0033059']
[22919]	[]	[]
[]	[72084]	[]
[]	[72083]	[]
[]	[]	['FBgn0033785']
[]	[]	['FBgn0037753']
[]	[]	['FBgn0001233']
[]	[]	['FBgn0050291']
[]	[268288]	[]
[]	[104445]	[]
[]	[319207]	[]
[]	[104015]	[]
[]	[]	['FBgn0039857']
[54891]	[]	[]
[5725]	[]	[]
[]	[]	['FBgn0015379']
[]	[]	['FBgn0032817']
[]	[]	['FBgn0032639']
[]	[218232]	[]
[]	[]	['FBgn0034089']
[]	[22083]	[]
[120376]	[]	[]
[54838]	[]	[]
[]	[]	['FBgn0033241']
[]	[71213]	[]
[]	[71207]	[]
[]	[]	['FBgn0033366']
[]	[]	['FBgn0024733']
[]	[546336]	[]
[]	[382620]	[]
[]	[]	['FBgn0032482']
[54971]	[]	[]
[]	[22200]	[]
[]	[]	['FBgn0028343']
[284325]	[]	[]
[]	[]	['FBgn0038595']
[5784]	[]	[]
[]	[]	['FBgn0015282']
[5783]	[]	[]
[]	[]	['FBgn0053080']
[]	[574403]	[]
[]	[104082]	[]
[]	[71313]	[]
[]	[104080]	[]
[]	[]	['FBgn0027786']
[]	[71198]	[]
[]	[71361]	[]
[84747]	[]	[]
[9857]	[]	[]
[]	[]	['FBgn0033555']
[]	[21942]	[]
[]	[21941]	[]
[]	[21934]	[]
[]	[]	['FBgn0011774']
[]	[]	['FBgn0053170']
[54737]	[]	[]
[]	[399599]	[]
[]	[]	['FBgn0261872']
[54680]	[]	[]
[]	[]	['FBgn0033769']
[]	[71059]	[]
[5519]	[]	[]
[]	[]	['FBgn0028746']
[]	[]	['FBgn0039690']
[]	[22045]	[]
[187]	[]	[]
[23102]	[]	[]
[]	[]	['FBgn0028648']
[]	[]	['FBgn0034802']
[]	[71176]	[]
[]	[22019]	[]
[]	[]	['FBgn0033562']
[]	[]	['FBgn0044452']
[]	[21974]	[]
[]	[14588]	[]
[6925]	[]	[]
[]	[]	['FBgn0014033']
[54756]	[]	[]
[]	[]	['FBgn0039008']
[]	[]	['FBgn0087002']
[]	[]	['FBgn0028896']
[]	[22215]	[]
[]	[104444]	[]
[6038]	[]	[]
[22856]	[]	[]
[]	[]	['FBgn0038829']
[]	[71591]	[]
[55205]	[]	[]
[]	[71584]	[]
[]	[]	['FBgn0037186']
[]	[22415]	[]
[]	[]	['FBgn0034087']
[]	[]	['FBgn0051414']
[65265]	[]	[]
[]	[]	['FBgn0038853']
[]	[]	['FBgn0037814']
[]	[235379]	[]
[]	[]	['FBgn0259736']
[]	[320500]	[]
[]	[219072]	[]
[]	[71522]	[]
[]	[219114]	[]
[]	[71675]	[]
[]	[]	['FBgn0035900']
[]	[71670]	[]
[]	[]	['FBgn0032810']
[]	[]	['FBgn0243486']
[153579]	[]	[]
[6480]	[]	[]
[55233]	[]	[]
[]	[]	['FBgn0013325']
[]	[333789]	[]
[]	[71643]	[]
[]	[]	['FBgn0016685']
[]	[]	['FBgn0037135']
[]	[]	['FBgn0031860']
[5992]	[]	[]
[]	[71521]	[]
[]	[71371]	[]
[]	[71405]	[]
[]	[]	['FBgn0030465']
[]	[]	['FBgn0036813']
[]	[]	['FBgn0051715']
[79848]	[]	[]
[]	[]	['FBgn0033661']
[55026]	[]	[]
[]	[]	['FBgn0034391']
[]	[22278]	[]
[]	[]	['FBgn0040261']
[254428]	[]	[]
[]	[]	['FBgn0032683']
[]	[]	['FBgn0037684']
[]	[]	['FBgn0032058']
[]	[22222]	[]
[]	[22276]	[]
[]	[]	['FBgn0039508']
[]	[22365]	[]
[]	[235300]	[]
[91107]	[]	[]
[55608]	[]	[]
[]	[]	['FBgn0033556']
[]	[93835]	[]
[]	[]	['FBgn0061515']
[5928]	[]	[]
[]	[]	['FBgn0028744']
[]	[22284]	[]
[2059]	[]	[]
[5919]	[]	[]
[]	[71448]	[]
[]	[]	['FBgn0260742']
[6446]	[]	[]
[]	[235281]	[]
[]	[]	['FBgn0003189']
[]	[]	['FBgn0025700']
[]	[]	['FBgn0035964']
[]	[269629]	[]
[]	[]	['FBgn0030733']
[]	[73047]	[]
[]	[]	['FBgn0039877']
[]	[]	['FBgn0034363']
[]	[269639]	[]
[]	[]	['FBgn0035189']
[]	[]	['FBgn0004430']
[]	[]	['FBgn0027080']
[]	[56626]	[]
[7462]	[]	[]
[138255]	[]	[]
[]	[72978]	[]
[51125]	[]	[]
[]	[105734]	[]
[]	[]	['FBgn0051453']
[]	[]	['FBgn0010411']
[]	[]	['FBgn0036298']
[]	[]	['FBgn0036188']
[]	[56736]	[]
[]	[]	['FBgn0032643']
[]	[]	['FBgn0051864']
[]	[]	['FBgn0002607']
[]	[]	['FBgn0004028']
[]	[56717]	[]
[]	[]	['FBgn0034258']
[]	[]	['FBgn0033792']
[]	[]	['FBgn0040238']
[]	[23938]	[]
[]	[23934]	[]
[7546]	[]	[]
[]	[]	['FBgn0004034']
[]	[]	['FBgn0032919']
[]	[]	['FBgn0035374']
[]	[]	['FBgn0261671']
[]	[]	['FBgn0021768']
[]	[]	['FBgn0038488']
[]	[]	['FBgn0050083']
[]	[56495]	[]
[]	[]	['FBgn0036380']
[]	[105638]	[]
[]	[]	['FBgn0034986']
[3516]	[]	[]
[]	[56433]	[]
[]	[]	['FBgn0037942']
[]	[331623]	[]
[]	[]	['FBgn0037976']
[]	[]	['FBgn0038475']
[]	[56412]	[]
[]	[]	['FBgn0004133']
[1903]	[]	[]
[]	[]	['FBgn0262570']
[150275]	[]	[]
[]	[23808]	[]
[]	[]	['FBgn0033926']
[]	[105727]	[]
[]	[23801]	[]
[]	[]	['FBgn0001090']
[]	[72938]	[]
[]	[]	['FBgn0036008']
[]	[72230]	[]
[79701]	[]	[]
[]	[56506]	[]
[]	[269529]	[]
[]	[]	['FBgn0040259']
[]	[56527]	[]
[]	[171211]	[]
[]	[171210]	[]
[]	[105663]	[]
[]	[]	['FBgn0035524']
[]	[73137]	[]
[]	[]	['FBgn0031395']
[6261]	[]	[]
[348995]	[]	[]
[]	[]	['FBgn0001078']
[]	[271639]	[]
[]	[17686]	[]
[56963]	[]	[]
[]	[269952]	[]
[7805]	[]	[]
[]	[]	['FBgn0053180']
[91369]	[]	[]
[7802]	[]	[]
[]	[]	['FBgn0029738']
[]	[26992]	[]
[]	[]	['FBgn0035707']
[]	[]	['FBgn0003638']
[]	[106143]	[]
[]	[]	['FBgn0039296']
[]	[]	['FBgn0039402']
[]	[]	['FBgn0037332']
[]	[]	['FBgn0035619']
[]	[]	['FBgn0040227']
[]	[]	['FBgn0015321']
[]	[]	['FBgn0026192']
[]	[270035]	[]
[]	[270028]	[]
[]	[433864]	[]
[]	[73390]	[]
[]	[77771]	[]
[]	[73407]	[]
[]	[]	['FBgn0050503']
[]	[]	['FBgn0031784']
[57546]	[]	[]
[]	[]	['FBgn0000079']
[]	[]	['FBgn0041205']
[8987]	[]	[]
[]	[]	['FBgn0015567']
[]	[]	['FBgn0029736']
[]	[]	['FBgn0263121']
[]	[73192]	[]
[]	[171486]	[]
[]	[56795]	[]
[]	[73174]	[]
[]	[73172]	[]
[]	[]	['FBgn0038542']
[]	[]	['FBgn0039207']
[]	[24010]	[]
[]	[24004]	[]
[]	[56771]	[]
[]	[]	['FBgn0038739']
[]	[]	['FBgn0087041']
[]	[]	['FBgn0261808']
[]	[237052]	[]
[]	[]	['FBgn0026238']
[]	[24132]	[]
[]	[24100]	[]
[]	[]	['FBgn0031040']
[56890]	[]	[]
[]	[]	['FBgn0034654']
[]	[]	['FBgn0261020']
[]	[73261]	[]
[]	[]	['FBgn0038083']
[]	[73251]	[]
[]	[329777]	[]
[]	[73246]	[]
[162394]	[]	[]
[]	[]	['FBgn0037244']
[]	[73229]	[]
[]	[]	['FBgn0014184']
[]	[]	['FBgn0037567']
[]	[72776]	[]
[]	[]	['FBgn0030738']
[]	[72772]	[]
[]	[]	['FBgn0050438']
[]	[]	['FBgn0041582']
[]	[]	['FBgn0039600']
[]	[236285]	[]
[6907]	[]	[]
[]	[56050]	[]
[]	[]	['FBgn0037850']
[6884]	[]	[]
[]	[170760]	[]
[]	[]	['FBgn0026576']
[]	[]	['FBgn0032779']
[23261]	[]	[]
[23258]	[]	[]
[]	[192292]	[]
[23247]	[]	[]
[]	[56069]	[]
[]	[170762]	[]
[23245]	[]	[]
[]	[]	['FBgn0035431']
[]	[72502]	[]
[]	[170799]	[]
[]	[]	['FBgn0031021']
[203228]	[]	[]
[]	[72486]	[]
[]	[170789]	[]
[]	[72480]	[]
[]	[56075]	[]
[]	[105246]	[]
[]	[]	['FBgn0032781']
[23314]	[]	[]
[23313]	[]	[]
[]	[]	['FBgn0010425']
[]	[]	['FBgn0035082']
[]	[]	['FBgn0085257']
[]	[]	['FBgn0038745']
[]	[]	['FBgn0028717']
[]	[]	['FBgn0020236']
[]	[72320]	[]
[]	[55934]	[]
[]	[]	['FBgn0052016']
[]	[]	['FBgn0031413']
[23097]	[]	[]
[]	[]	['FBgn0034484']
[]	[]	['FBgn0053854']
[]	[268933]	[]
[]	[]	['FBgn0015571']
[55905]	[]	[]
[]	[]	['FBgn0026718']
[]	[]	['FBgn0011693']
[]	[]	['FBgn0034858']
[]	[72273]	[]
[]	[]	['FBgn0003209']
[]	[55947]	[]
[23242]	[]	[]
[]	[72368]	[]
[]	[56009]	[]
[]	[72392]	[]
[]	[]	['FBgn0004888']
[]	[55991]	[]
[]	[72371]	[]
[]	[]	['FBgn0030812']
[]	[]	['FBgn0003165']
[]	[]	['FBgn0050042']
[115825]	[]	[]
[]	[72357]	[]
[]	[]	['FBgn0000055']
[]	[]	['FBgn0035355']
[]	[]	['FBgn0053554']
[26959]	[]	[]
[]	[72504]	[]
[]	[269113]	[]
[]	[71701]	[]
[]	[72685]	[]
[]	[72709]	[]
[]	[56324]	[]
[]	[56322]	[]
[]	[]	['FBgn0038533']
[]	[56317]	[]
[]	[56316]	[]
[]	[]	['FBgn0015781']
[23564]	[]	[]
[23036]	[]	[]
[]	[252903]	[]
[]	[56294]	[]
[]	[56292]	[]
[23522]	[]	[]
[2628]	[]	[]
[7175]	[]	[]
[23566]	[]	[]
[]	[]	['FBgn0040102']
[]	[56361]	[]
[]	[56386]	[]
[]	[56384]	[]
[]	[]	['FBgn0010772']
[]	[72750]	[]
[]	[72749]	[]
[]	[]	['FBgn0259932']
[]	[]	['FBgn0051633']
[]	[]	['FBgn0032609']
[6662]	[]	[]
[]	[]	['FBgn0015765']
[1200]	[]	[]
[]	[269336]	[]
[]	[]	['FBgn0030941']
[]	[72720]	[]
[]	[72668]	[]
[]	[]	['FBgn0013432']
[]	[]	['FBgn0029858']
[]	[56174]	[]
[]	[56207]	[]
[7049]	[]	[]
[23429]	[]	[]
[]	[56195]	[]
[7037]	[]	[]
[]	[72568]	[]
[]	[56173]	[]
[]	[]	['FBgn0028691']
[]	[72542]	[]
[]	[]	['FBgn0035266']
[]	[56150]	[]
[]	[170833]	[]
[]	[72514]	[]
[]	[]	['FBgn0033271']
[]	[]	['FBgn0024912']
[55790]	[]	[]
[]	[269209]	[]
[90799]	[]	[]
[]	[]	['FBgn0036985']
[]	[56228]	[]
[]	[56229]	[]
[23272]	[]	[]
[]	[]	['FBgn0034796']
[]	[]	['FBgn0086689']
[]	[72640]	[]
[]	[269254]	[]
[1490]	[]	[]
[]	[56273]	[]
[]	[]	['FBgn0053169']
[]	[72662]	[]
[]	[72185]	[]
[]	[]	['FBgn0032925']
[154810]	[]	[]
[]	[]	['FBgn0259229']
[]	[]	['FBgn0038484']
[]	[]	['FBgn0030720']
[]	[14248]	[]
[]	[]	['FBgn0025140']
[]	[]	['FBgn0038277']
[]	[]	['FBgn0033631']
[]	[]	['FBgn0039006']
[]	[227197]	[]
[]	[]	['FBgn0010417']
[79740]	[]	[]
[]	[210808]	[]
[]	[210801]	[]
[]	[]	['FBgn0030407']
[5094]	[]	[]
[]	[]	['FBgn0083946']
[]	[14266]	[]
[]	[]	['FBgn0036213']
[]	[]	['FBgn0039630']
[56288]	[]	[]
[]	[]	['FBgn0019982']
[]	[]	['FBgn0261976']
[]	[]	['FBgn0015351']
[]	[]	['FBgn0027360']
[]	[]	['FBgn0263256']
[]	[]	['FBgn0003162']
[]	[]	['FBgn0058196']
[]	[]	['FBgn0000251']
[]	[14317]	[]
[]	[]	['FBgn0031470']
[64853]	[]	[]
[]	[]	['FBgn0033317']
[]	[73379]	[]
[]	[381280]	[]
[]	[227154]	[]
[]	[14156]	[]
[]	[]	['FBgn0035696']
[79583]	[]	[]
[]	[14070]	[]
[]	[14069]	[]
[]	[]	['FBgn0002909']
[283349]	[]	[]
[]	[14062]	[]
[]	[]	['FBgn0085693']
[]	[194268]	[]
[]	[]	['FBgn0000529']
[]	[14042]	[]
[]	[79565]	[]
[]	[620235]	[]
[6347]	[]	[]
[]	[14017]	[]
[]	[]	['FBgn0039411']
[]	[]	['FBgn0036278']
[]	[14084]	[]
[]	[]	['FBgn0037756']
[]	[]	['FBgn0261606']
[151651]	[]	[]
[]	[]	['FBgn0029713']
[]	[243510]	[]
[]	[]	['FBgn0041709']
[79666]	[]	[]
[79663]	[]	[]
[152137]	[]	[]
[79627]	[]	[]
[]	[]	['FBgn0030802']
[]	[]	['FBgn0026585']
[285800]	[]	[]
[]	[]	['FBgn0250754']
[]	[]	['FBgn0002531']
[]	[]	['FBgn0050384']
[64417]	[]	[]
[]	[]	['FBgn0003178']
[]	[]	['FBgn0036157']
[9761]	[]	[]
[]	[211255]	[]
[]	[]	['FBgn0003514']
[]	[227619]	[]
[]	[]	['FBgn0083167']
[]	[227615]	[]
[]	[14618]	[]
[]	[]	['FBgn0029715']
[]	[]	['FBgn0054057']
[]	[]	['FBgn0004811']
[]	[13353]	[]
[]	[]	['FBgn0027619']
[]	[100043133]	[]
[]	[14571]	[]
[]	[]	['FBgn0038865']
[]	[]	['FBgn0010408']
[90506]	[]	[]
[]	[30940]	[]
[]	[320191]	[]
[]	[]	['FBgn0030394']
[]	[]	['FBgn0027836']
[5990]	[]	[]
[]	[14731]	[]
[]	[]	['FBgn0040503']
[]	[194952]	[]
[]	[]	['FBgn0035500']
[]	[]	['FBgn0261561']
[]	[]	['FBgn0027580']
[]	[]	['FBgn0038145']
[]	[227693]	[]
[]	[]	['FBgn0026418']
[]	[227682]	[]
[80217]	[]	[]
[]	[30944]	[]
[]	[260315]	[]
[]	[]	['FBgn0023211']
[30812]	[]	[]
[]	[]	['FBgn0033928']
[]	[227449]	[]
[]	[70675]	[]
[]	[]	['FBgn0031877']
[]	[243813]	[]
[]	[]	['FBgn0053129']
[]	[]	['FBgn0005655']
[89796]	[]	[]
[]	[108899]	[]
[]	[]	['FBgn0036170']
[]	[]	['FBgn0039254']
[]	[620592]	[]
[]	[]	['FBgn0023170']
[]	[194590]	[]
[]	[14473]	[]
[]	[]	['FBgn0032431']
[]	[]	['FBgn0262782']
[]	[]	['FBgn0040077']
[]	[243923]	[]
[]	[30930]	[]
[]	[14545]	[]
[10135]	[]	[]
[]	[]	['FBgn0053465']
[]	[]	['FBgn0023540']
[]	[]	['FBgn0033551']
[89797]	[]	[]
[]	[]	['FBgn0053836']
[]	[]	['FBgn0053459']
[]	[]	['FBgn0263200']
[80036]	[]	[]
[]	[]	['FBgn0037504']
[]	[108912]	[]
[]	[]	['FBgn0032509']
[83937]	[]	[]
[63929]	[]	[]
[]	[]	['FBgn0025615']
[]	[79044]	[]
[10443]	[]	[]
[]	[13506]	[]
[]	[]	['FBgn0027601']
[79038]	[]	[]
[]	[381812]	[]
[]	[13495]	[]
[84172]	[]	[]
[]	[]	['FBgn0030332']
[8087]	[]	[]
[]	[242864]	[]
[]	[]	['FBgn0051613']
[]	[73242]	[]
[]	[]	['FBgn0031885']
[]	[13511]	[]
[]	[]	['FBgn0062412']
[]	[]	['FBgn0032078']
[]	[226562]	[]
[]	[]	['FBgn0086711']
[51068]	[]	[]
[29969]	[]	[]
[]	[242960]	[]
[]	[]	['FBgn0052441']
[]	[]	['FBgn0037215']
[]	[67797]	[]
[]	[54138]	[]
[79101]	[]	[]
[29945]	[]	[]
[]	[]	['FBgn0052438']
[]	[]	['FBgn0038144']
[]	[13544]	[]
[]	[210146]	[]
[]	[]	['FBgn0004507']
[]	[]	['FBgn0035763']
[]	[]	['FBgn0030218']
[]	[]	['FBgn0053857']
[]	[]	['FBgn0035237']
[]	[]	['FBgn0035987']
[]	[]	['FBgn0030558']
[1535]	[]	[]
[]	[]	['FBgn0014396']
[]	[]	['FBgn0031327']
[]	[]	['FBgn0035076']
[]	[78903]	[]
[]	[242705]	[]
[]	[242691]	[]
[10410]	[]	[]
[286207]	[]	[]
[10263]	[]	[]
[2217]	[]	[]
[]	[]	['FBgn0027930']
[]	[217951]	[]
[]	[]	['FBgn0027093']
[]	[78938]	[]
[]	[13427]	[]
[]	[13426]	[]
[]	[29805]	[]
[]	[]	['FBgn0037328']
[]	[]	['FBgn0036534']
[]	[]	['FBgn0053138']
[]	[]	['FBgn0029723']
[]	[78908]	[]
[]	[619605]	[]
[]	[]	['FBgn0031926']
[359948]	[]	[]
[]	[]	['FBgn0038532']
[]	[]	['FBgn0053493']
[]	[]	['FBgn0032266']
[]	[13592]	[]
[54149]	[]	[]
[]	[]	['FBgn0032507']
[]	[13858]	[]
[]	[]	['FBgn0017579']
[]	[]	['FBgn0000715']
[]	[]	['FBgn0038017']
[]	[]	['FBgn0025454']
[]	[]	['FBgn0035850']
[]	[]	['FBgn0031781']
[8099]	[]	[]
[6421]	[]	[]
[]	[]	['FBgn0062463']
[]	[]	['FBgn0010611']
[]	[212569]	[]
[]	[]	['FBgn0030892']
[81493]	[]	[]
[]	[]	['FBgn0261274']
[]	[243274]	[]
[]	[]	['FBgn0036652']
[]	[]	['FBgn0034401']
[]	[]	['FBgn0039805']
[]	[]	['FBgn0039120']
[6094]	[]	[]
[]	[210573]	[]
[]	[243339]	[]
[]	[]	['FBgn0017561']
[]	[209416]	[]
[]	[]	['FBgn0029911']
[]	[]	['FBgn0035383']
[]	[70591]	[]
[]	[53885]	[]
[]	[243308]	[]
[]	[]	['FBgn0003462']
[]	[79464]	[]
[]	[243300]	[]
[]	[]	['FBgn0002780']
[]	[77929]	[]
[]	[]	['FBgn0011272']
[]	[]	['FBgn0036208']
[5010]	[]	[]
[]	[30056]	[]
[]	[30052]	[]
[]	[]	['FBgn0015222']
[]	[]	['FBgn0038552']
[56829]	[]	[]
[51191]	[]	[]
[]	[624582]	[]
[9728]	[]	[]
[]	[]	['FBgn0036695']
[79155]	[]	[]
[51421]	[]	[]
[]	[193838]	[]
[7730]	[]	[]
[]	[]	['FBgn0029839']
[]	[210297]	[]
[]	[]	['FBgn0262732']
[]	[210356]	[]
[51196]	[]	[]
[]	[]	['FBgn0086710']
[]	[226751]	[]
[]	[]	['FBgn0015756']
[]	[]	['FBgn0033570']
[]	[]	['FBgn0038923']
[]	[]	['FBgn0013676']
[]	[13690]	[]
[]	[]	['FBgn0038224']
[]	[]	['FBgn0029798']
[]	[]	['FBgn0024985']
[]	[212547]	[]
[]	[]	['FBgn0030610']
[]	[]	['FBgn0039703']
[80306]	[]	[]
[80314]	[]	[]
[]	[]	['FBgn0041711']
[]	[]	['FBgn0029093']
[65056]	[]	[]
[]	[]	['FBgn0033039']
[29956]	[]	[]
[]	[228876]	[]
[]	[70911]	[]
[]	[228858]	[]
[]	[]	['FBgn0001137']
[]	[212514]	[]
[]	[245670]	[]
[]	[]	['FBgn0039084']
[]	[]	['FBgn0039728']
[]	[228829]	[]
[]	[]	['FBgn0035959']
[]	[277978]	[]
[]	[]	['FBgn0025469']
[]	[212518]	[]
[]	[228812]	[]
[]	[65113]	[]
[]	[]	['FBgn0035356']
[]	[]	['FBgn0020764']
[]	[15980]	[]
[]	[]	['FBgn0035501']
[65125]	[]	[]
[]	[65115]	[]
[]	[]	['FBgn0024811']
[]	[228911]	[]
[]	[]	['FBgn0036738']
[]	[]	['FBgn0015324']
[]	[]	['FBgn0020655']
[]	[]	['FBgn0031566']
[]	[]	['FBgn0034430']
[]	[]	['FBgn0029763']
[]	[]	['FBgn0033918']
[]	[68170]	[]
[]	[245368]	[]
[]	[]	['FBgn0037592']
[]	[]	['FBgn0030719']
[]	[330286]	[]
[]	[]	['FBgn0036843']
[]	[245000]	[]
[]	[]	['FBgn0003321']
[]	[97541]	[]
[]	[]	['FBgn0019925']
[]	[]	['FBgn0034656']
[64762]	[]	[]
[220382]	[]	[]
[]	[]	['FBgn0038303']
[]	[15587]	[]
[]	[244958]	[]
[]	[]	['FBgn0036742']
[]	[]	['FBgn0033226']
[]	[]	['FBgn0035539']
[55259]	[]	[]
[]	[]	['FBgn0015075']
[727764]	[]	[]
[]	[]	['FBgn0013746']
[]	[]	['FBgn0004057']
[]	[228778]	[]
[]	[212390]	[]
[]	[64933]	[]
[]	[]	['FBgn0038524']
[23127]	[]	[]
[]	[212377]	[]
[]	[228730]	[]
[]	[228714]	[]
[]	[]	['FBgn0040754']
[]	[110417]	[]
[]	[]	['FBgn0020637']
[]	[]	['FBgn0035947']
[]	[]	['FBgn0052062']
[]	[97484]	[]
[]	[13626]	[]
[]	[]	['FBgn0037360']
[]	[319468]	[]
[10902]	[]	[]
[]	[245622]	[]
[]	[]	['FBgn0260006']
[]	[]	['FBgn0038211']
[84888]	[]	[]
[]	[]	['FBgn0032518']
[]	[245578]	[]
[]	[]	['FBgn0085188']
[]	[16193]	[]
[]	[]	['FBgn0003870']
[]	[]	['FBgn0030362']
[]	[]	['FBgn0052066']
[]	[212880]	[]
[3709]	[]	[]
[]	[16161]	[]
[91653]	[]	[]
[]	[229363]	[]
[]	[81905]	[]
[]	[]	['FBgn0035194']
[]	[]	['FBgn0034067']
[]	[16351]	[]
[]	[]	['FBgn0050296']
[]	[114615]	[]
[]	[100040608]	[]
[]	[]	['FBgn0025458']
[]	[81907]	[]
[]	[]	['FBgn0031703']
[]	[]	['FBgn0000448']
[]	[]	['FBgn0050382']
[]	[68251]	[]
[]	[16165]	[]
[]	[]	['FBgn0034069']
[]	[81535]	[]
[]	[]	['FBgn0030306']
[]	[81601]	[]
[]	[]	['FBgn0036257']
[]	[]	['FBgn0038693']
[90007]	[]	[]
[]	[]	['FBgn0035791']
[]	[245424]	[]
[]	[68209]	[]
[]	[16069]	[]
[]	[245404]	[]
[]	[245403]	[]
[]	[229011]	[]
[]	[]	['FBgn0031399']
[]	[68183]	[]
[]	[]	['FBgn0053806']
[7090]	[]	[]
[]	[245446]	[]
[81688]	[]	[]
[]	[]	['FBgn0027866']
[]	[245527]	[]
[]	[245526]	[]
[]	[27267]	[]
[]	[245522]	[]
[]	[]	['FBgn0040954']
[81669]	[]	[]
[]	[]	['FBgn0036787']
[]	[212679]	[]
[9709]	[]	[]
[]	[]	['FBgn0036239']
[]	[]	['FBgn0016675']
[]	[65247]	[]
[]	[245468]	[]
[]	[232946]	[]
[]	[]	['FBgn0038570']
[]	[]	['FBgn0039959']
[63931]	[]	[]
[]	[]	['FBgn0029629']
[]	[228061]	[]
[]	[211673]	[]
[]	[64213]	[]
[64332]	[]	[]
[6502]	[]	[]
[]	[]	['FBgn0025463']
[]	[]	['FBgn0030799']
[]	[]	['FBgn0019644']
[]	[]	['FBgn0000108']
[5229]	[]	[]
[]	[80517]	[]
[]	[]	['FBgn0033912']
[]	[]	['FBgn0034733']
[]	[]	['FBgn0036834']
[]	[]	['FBgn0010549']
[]	[83428]	[]
[]	[]	['FBgn0053803']
[]	[]	['FBgn0026755']
[64318]	[]	[]
[]	[228140]	[]
[54407]	[]	[]
[]	[64295]	[]
[]	[]	['FBgn0033289']
[]	[64293]	[]
[]	[211739]	[]
[]	[15115]	[]
[]	[]	['FBgn0038397']
[51673]	[]	[]
[]	[]	['FBgn0039098']
[]	[]	['FBgn0034138']
[]	[]	['FBgn0040907']
[]	[]	['FBgn0004400']
[]	[244329]	[]
[]	[227933]	[]
[]	[]	['FBgn0033214']
[5445]	[]	[]
[]	[]	['FBgn0013272']
[]	[]	['FBgn0030991']
[]	[380753]	[]
[129531]	[]	[]
[408050]	[]	[]
[]	[14824]	[]
[]	[195040]	[]
[]	[244238]	[]
[]	[]	['FBgn0033050']
[]	[]	['FBgn0004914']
[]	[70325]	[]
[]	[211401]	[]
[]	[14788]	[]
[63933]	[]	[]
[]	[]	['FBgn0085453']
[truncated: 2,969 more rows]

## Sheet: Downregulated Conserved HD DEG
Human (Entrez ID)	Mouse (Entrez ID)	Drosophila (FlyBase ID)
[4145, 55359, 2161, 2324, 145581, 25791, 10439, 84189.0, 4345, 10516, 57633, 9508, 29993, 6453, 10683, 22865, 8536, 8573, 54674, 22859, 128434, 27020, 26045, 95681, 26050, 139728, 84033, 57863, 5646, 54874, 576, 577, 57611, 1612, 347730, 1630, 57451, 5778, 84631.0, 84634, 5797, 5798, 5799, 5801, 23266, 23284, 143098, 815, 57118, 816, 814, 4915, 9353, 4916, 57172, 139065, 11122, 8997, 84867.0, 848…	[69635, 74761, 74762, 242702, 71704, 14368, 14369, 12322, 12323, 12326, 208936, 68655, 353328, 330814, 16449, 16450, 16452, 16453, 13384, 20564, 11352, 15451, 192187, 27762, 67703, 94352, 16542, 12458, 14365, 21682, 269855, 243914, 19649, 56524, 68810, 18636, 16590, 12511, 242384, 14205, 11504, 239857, 19699, 407800, 18682, 227541, 320772, 215303, 237847, 227618, 66864, 107831, 21824, 23876, 5461…	['FBgn0003255', 'FBgn0034660', 'FBgn0011556', 'FBgn0036181', 'FBgn0260660', 'FBgn0051665', 'FBgn0039354', 'FBgn0259240', 'FBgn0262729', 'FBgn0052475', 'FBgn0029791', 'FBgn0000071', 'FBgn0052271', 'FBgn0040726', 'FBgn0087011', 'FBgn0259998', 'FBgn0015001', 'FBgn0024277', 'FBgn0052057', 'FBgn0023095', 'FBgn0004647', 'FBgn0259182', 'FBgn0034517', 'FBgn0051720', 'FBgn0034286', 'FBgn0005775', 'FBgn003…
[3097, 83482, 3642, 27107, 169834.0, 51341, 83855.0, 1958, 64919, 57711, 1961, 688, 7644, 168544, 10472, 1960]	[434179, 118445, 232976, 271377, 268564, 16601, 74533, 381990, 68910, 66869, 77117, 109889, 58180, 75079, 209225, 320080, 13653, 13654, 13655, 13656, 194655, 58208, 233060, 328977, 22640, 269800, 22642, 224893, 57745, 68750, 224656, 22678, 56218, 241311, 22694, 382639, 268469, 16969, 22718, 243906, 232337, 193736, 56525, 30927, 77264, 100039123, 226442, 210135, 16600, 100041433, 13018, 20687, 736…	['FBgn0038339', 'FBgn0004652', 'FBgn0032817', 'FBgn0003396', 'FBgn0045852', 'FBgn0028647', 'FBgn0052767', 'FBgn0032401', 'FBgn0263115', 'FBgn0020309', 'FBgn0035137', 'FBgn0038301', 'FBgn0035481', 'FBgn0037275', 'FBgn0035769', 'FBgn0037031', 'FBgn0260741', 'FBgn0027339', 'FBgn0259172', 'FBgn0010768', 'FBgn0033310', 'FBgn0043364', 'FBgn0086758', 'FBgn0035144', 'FBgn0004893', 'FBgn0030240', 'FBgn003…
[260293, 10858]	[13121, 13124, 170716, 13116]	['FBgn0015038', 'FBgn0011576', 'FBgn0038037', 'FBgn0035344', 'FBgn0033978', 'FBgn0030615', 'FBgn0015039', 'FBgn0013771', 'FBgn0036778', 'FBgn0033292', 'FBgn0010019', 'FBgn0005670', 'FBgn0038236', 'FBgn0031694', 'FBgn0031925', 'FBgn0015714', 'FBgn0014469', 'FBgn0033304', 'FBgn0030304', 'FBgn0013773', 'FBgn0015040', 'FBgn0015033', 'FBgn0033395', 'FBgn0030369', 'FBgn0034053', 'FBgn0033775', 'FBgn003…
[4311]	[230857, 18675, 27390]	['FBgn0039564', 'FBgn0037230', 'FBgn0037727', 'FBgn0039611', 'FBgn0027578', 'FBgn0029769', 'FBgn0039022', 'FBgn0039024', 'FBgn0030425', 'FBgn0027528', 'FBgn0259716', 'FBgn0032613', 'FBgn0039613', 'FBgn0039023', 'FBgn0039612', 'FBgn0039478', 'FBgn0031808', 'FBgn0038818', 'FBgn0027570', 'FBgn0039609', 'FBgn0031081', 'FBgn0029843', 'FBgn0031805']
[10636, 85397, 8601, 27445, 22895, 9783, 140730, 8927, 5999, 26575, 22999, 9699, 84708, 222183.0, 5997, 6000, 8787, 8490, 23037]	[100503041, 19736, 19735, 51791, 19739, 16170, 71729, 12217, 67865, 58175, 17345, 24012, 67792, 56149, 227929, 19737, 50782, 68070, 60425, 58212, 20650, 380714]	['FBgn0035253', 'FBgn0001263', 'FBgn0052132', 'FBgn0030230', 'FBgn0085446', 'FBgn0037130', 'FBgn0038606', 'FBgn0035676', 'FBgn0024941', 'FBgn0263177', 'FBgn0040390', 'FBgn0053547', 'FBgn0035364', 'FBgn0040387', 'FBgn0028743', 'FBgn0020278', 'FBgn0087007', 'FBgn0085429']
[43, 22871, 57502.0]	[67935, 192167]	['FBgn0083975', 'FBgn0031866', 'FBgn0000594', 'FBgn0015568', 'FBgn0015576', 'FBgn0000024', 'FBgn0261393', 'FBgn0031327', 'FBgn0015570', 'FBgn0039084', 'FBgn0015577', 'FBgn0051146', 'FBgn0004108', 'FBgn0015575', 'FBgn0034972', 'FBgn0037090', 'FBgn0000592', 'FBgn0000326', 'FBgn0083963', 'FBgn0001114', 'FBgn0015569', 'FBgn0034736']
[1812, 1813, 152, 3358.0, 3360, 2850, 11255, 153, 54329]	[15552, 11552, 15557, 15562, 209776, 11549, 11553, 99296, 13488, 13489, 13491, 13492, 15551]	['FBgn0037546', 'FBgn0053639', 'FBgn0029768', 'FBgn0011582', 'FBgn0004573', 'FBgn0038542', 'FBgn0087012', 'FBgn0053696', 'FBgn0029723', 'FBgn0053517', 'FBgn0038541', 'FBgn0035385', 'FBgn0039419', 'FBgn0261929', 'FBgn0004168', 'FBgn0038653', 'FBgn0015129', 'FBgn0250910', 'FBgn0024944', 'FBgn0038980']
[129049, 9521, 9905]	[97761, 210789]	['FBgn0038029', 'FBgn0031117', 'FBgn0033817', 'FBgn0261261', 'FBgn0063497', 'FBgn0033381', 'FBgn0063493', 'FBgn0010039', 'FBgn0050000', 'FBgn0034354', 'FBgn0001149', 'FBgn0027590', 'FBgn0010041', 'FBgn0063498', 'FBgn0063491', 'FBgn0030484', 'FBgn0029176', 'FBgn0010038', 'FBgn0038020']
[2902, 2890, 2891, 2892, 2898, 2901, 2903, 2904]	[14803, 14806, 14809, 14810, 14813, 53623, 170483]	['FBgn0028431', 'FBgn0261402', 'FBgn0053513', 'FBgn0039916', 'FBgn0039927', 'FBgn0038840', 'FBgn0259215', 'FBgn0031634', 'FBgn0036150', 'FBgn0051201', 'FBgn0031209', 'FBgn0028422', 'FBgn0020429', 'FBgn0004620', 'FBgn0030385', 'FBgn0260235', 'FBgn0051718', 'FBgn0036757', 'FBgn0010399']
[22987, 51310, 55530, 9899, 9900]	[75209, 73102, 20519]	['FBgn0039178', 'FBgn0038752', 'FBgn0033809', 'FBgn0038260', 'FBgn0038262', 'FBgn0038720', 'FBgn0037144', 'FBgn0029896', 'FBgn0038407', 'FBgn0051530', 'FBgn0019952', 'FBgn0034479', 'FBgn0032879', 'FBgn0037140', 'FBgn0037273', 'FBgn0038938', 'FBgn0051272', 'FBgn0033778', 'FBgn0086365']
[9218, 157807, 9717]	[380683, 50500, 74438, 74136, 76763, 67815]	['FBgn0053966', 'FBgn0052407', 'FBgn0029608', 'FBgn0036289', 'FBgn0051826', 'FBgn0035636', 'FBgn0039864', 'FBgn0029863', 'FBgn0053523', 'FBgn0023525', 'FBgn0031914', 'FBgn0032783', 'FBgn0033437', 'FBgn0050339', 'FBgn0031913', 'FBgn0031814', 'FBgn0032785']
[6785]	[68801, 14979, 54325]	['FBgn0037763', 'FBgn0051523', 'FBgn0034382', 'FBgn0039030', 'FBgn0038983', 'FBgn0037354', 'FBgn0037765', 'FBgn0051522', 'FBgn0260942', 'FBgn0040349', 'FBgn0037762', 'FBgn0050008', 'FBgn0031360', 'FBgn0038986', 'FBgn0037534', 'FBgn0053110', 'FBgn0051548']
[79154]	[109857, 70750]	['FBgn0034500', 'FBgn0051235', 'FBgn0050495', 'FBgn0033205', 'FBgn0069972', 'FBgn0030332', 'FBgn0038610', 'FBgn0036380', 'FBgn0038946', 'FBgn0038878', 'FBgn0069973', 'FBgn0033204', 'FBgn0031775', 'FBgn0026268', 'FBgn0029866', 'FBgn0030073']
[9478, 801.0, 8034, 79085, 83698, 793]	[13650, 227731, 246104, 12313, 12314, 12315, 66972, 140904, 29867, 12307, 329972, 194744, 73660]	['FBgn0030318', 'FBgn0010424', 'FBgn0031692', 'FBgn0037852', 'FBgn0067783', 'FBgn0004580', 'FBgn0010423', 'FBgn0000253', 'FBgn0052103', 'FBgn0013348', 'FBgn0035078', 'FBgn0004910', 'FBgn0032415', 'FBgn0040351', 'FBgn0004635']
[7436, 29967, 1173, 9806, 64094, 4037, 26470, 124925, 50859]	[16835, 228357, 72902, 16012, 16010, 16011, 16973, 16974, 20370, 12628, 17175, 18073, 18074, 20660, 71753]	['FBgn0262169', 'FBgn0000119', 'FBgn0001253', 'FBgn0051092', 'FBgn0026403', 'FBgn0039054', 'FBgn0030706', 'FBgn0051217', 'FBgn0053087', 'FBgn0261260', 'FBgn0010114', 'FBgn0033880', 'FBgn0066101']
[253650, 134548, 83992, 10075, 287.0, 288, 283450, 57531]	[213121, 68854, 30785, 243983, 117590, 16348, 105377, 244859, 75305, 108911, 99696, 69299, 209462, 52024, 226101]	['FBgn0086898', 'FBgn0261554', 'FBgn0053288', 'FBgn0011747', 'FBgn0039590', 'FBgn0032934', 'FBgn0031675', 'FBgn0261788', 'FBgn0035113', 'FBgn0031107', 'FBgn0036302', 'FBgn0035934', 'FBgn0031384', 'FBgn0259179']
[4023]	[85031]	['FBgn0030828', 'FBgn0039472', 'FBgn0051686', 'FBgn0029831', 'FBgn0031405', 'FBgn0031976', 'FBgn0039474', 'FBgn0036367', 'FBgn0004047', 'FBgn0004045', 'FBgn0032029', 'FBgn0039471', 'FBgn0005391']
[4886, 4889, 54112, 4986]	[20609, 14608, 14289, 23890, 18387, 14293, 21336, 226278, 12267, 18386, 239283, 64378, 104443]	['FBgn0035610', 'FBgn0036934', 'FBgn0004841', 'FBgn0037408', 'FBgn0004622', 'FBgn0036790', 'FBgn0025631']
[3265, 85004, 91608, 148252, 161253, 54769, 9077, 6014, 23551]	[75141, 76166, 140743, 68939, 276952, 75668, 20130, 68203, 15461, 56044, 232441, 17532]	['FBgn0041191', 'FBgn0037754', 'FBgn0035733', 'FBgn0085426', 'FBgn0037326', 'FBgn0085419', 'FBgn0260658', 'FBgn0050158', 'FBgn0034434', 'FBgn0002567', 'FBgn0017549']
[5579, 5580, 5581, 5582, 5583, 7259, 23270, 9854, 85453]	[18752, 18754, 18755, 239364, 19153, 71764, 109333, 56086, 320795, 20753, 18750, 18751]	['FBgn0020621', 'FBgn0259680', 'FBgn0004462', 'FBgn0034420', 'FBgn0004784', 'FBgn0003091']
[107, 109, 111]	[224129, 104110, 15247, 104111]	['FBgn0003301', 'FBgn0263131', 'FBgn0051321', 'FBgn0035400', 'FBgn0033387', 'FBgn0040508', 'FBgn0004852', 'FBgn0260388', 'FBgn0030576', 'FBgn0024150', 'FBgn0039817']
[5274]	[12406, 282663, 66222, 15160, 20720, 71907, 238393]	['FBgn0031973', 'FBgn0028990', 'FBgn0044011', 'FBgn0028988', 'FBgn0038299', 'FBgn0036970', 'FBgn0024293', 'FBgn0002930', 'FBgn0028983', 'FBgn0033574', 'FBgn0028985']
[151473, 117247]	[20502, 104681, 57274]	['FBgn0035173', 'FBgn0033095', 'FBgn0033028', 'FBgn0259834', 'FBgn0034063', 'FBgn0001296', 'FBgn0023549', 'FBgn0033913', 'FBgn0031002', 'FBgn0031012', 'FBgn0031011']
[84918.0, 8506, 10653, 351]	[12870, 241175, 238680, 20732, 53321, 215001, 210108]	['FBgn0031561', 'FBgn0031560', 'FBgn0031563', 'FBgn0262870', 'FBgn0031559', 'FBgn0027550', 'FBgn0032116', 'FBgn0259247', 'FBgn0038654', 'FBgn0031558']
[5122, 57419, 5126, 6543, 80144, 6546, 25769]	[192199, 76376, 238384, 242022, 13866, 110891, 110893, 231470, 18549, 18554]	['FBgn0032683', 'FBgn0004509', 'FBgn0003731', 'FBgn0028704', 'FBgn0040030', 'FBgn0013995', 'FBgn0023179', 'FBgn0039941']
[6857, 6860, 6861, 127833, 84258, 91683, 94122, 57586, 148281, 9066]	[236643, 269589, 60510, 271844, 211429, 54524, 171180, 20980, 54526, 237397]	['FBgn0004242', 'FBgn0053555', 'FBgn0261089', 'FBgn0039900', 'FBgn0261090', 'FBgn0261085']
[57142, 87, 88, 4133, 9590, 6252, 6253, 6710, 6712]	[237891, 78926, 109711, 11472, 286940, 114601, 192176, 60595, 76469, 68585]	['FBgn0039257', 'FBgn0028371', 'FBgn0004167', 'FBgn0053113', 'FBgn0029881', 'FBgn0014141']
[6258, 5915, 7068]	[22337, 353187, 26379, 18667, 21907, 217166, 19411, 218772, 20182, 20183]	['FBgn0000568', 'FBgn0003651', 'FBgn0015240']
[1848, 11072, 1850]	[235584, 67603, 18218, 80915, 68082, 75219, 19252, 56405, 27389]	['FBgn0036844', 'FBgn0243512', 'FBgn0030976', 'FBgn0036369', 'FBgn0031044']
[2561, 2562, 2563, 2566, 2743, 2554, 2557, 2558, 2555]	[14397, 14403]	['FBgn0039840', 'FBgn0033558', 'FBgn0024963']
[259217, 6782]	[50497, 50884, 15525, 15511, 105855]	['FBgn0051354', 'FBgn0001218', 'FBgn0035878', 'FBgn0001216', 'FBgn0001230', 'FBgn0013276', 'FBgn0013279', 'FBgn0013275', 'FBgn0001219']
[64754]	[226144, 69726, 208211, 232187]	['FBgn0262599', 'FBgn0034182', 'FBgn0030102', 'FBgn0036839', 'FBgn0036282', 'FBgn0038552', 'FBgn0038869', 'FBgn0033917', 'FBgn0053548']
[773, 774, 775, 776, 777, 6323, 6326, 6328, 6334]	[12288, 12290, 20269]	['FBgn0260993', 'FBgn0263111', 'FBgn0001991', 'FBgn0085434']
[6049, 55819, 51652, 79589, 57484, 9867, 64219]	[224938, 66700, 407821, 22129, 67702, 105239, 22036, 22644, 330812]	['FBgn0038627', 'FBgn0034312', 'FBgn0004919', 'FBgn0037885', 'FBgn0026878']
[10000, 27330, 83891, 282974, 6197]	[170755, 11652, 56613, 57740, 20112, 23797, 269019, 102141, 73086]	['FBgn0052758', 'FBgn0015806', 'FBgn0052944', 'FBgn0029976']
[10057]	[20928, 17250, 224814, 244562, 239273, 27416, 27421, 20927]	['FBgn0263316', 'FBgn0051793', 'FBgn0032018', 'FBgn0039645', 'FBgn0032908', 'FBgn0039644', 'FBgn0039207', 'FBgn0032456', 'FBgn0034612']
[10395, 613, 9743, 115703]	[78816, 330914, 110279, 545481, 233071, 544817, 73910, 236920, 226652]	['FBgn0032821', 'FBgn0031118', 'FBgn0086901', 'FBgn0261461', 'FBgn0039994']
[10368, 10369, 59283, 27092]	[13731, 252868, 74720, 54376, 54377, 269994, 12300, 192216, 18858]	['FBgn0039014', 'FBgn0031159', 'FBgn0034267', 'FBgn0064123']
[4644, 4628]	[208943, 77579, 668940, 140781, 360013, 17880, 17918, 17919]	['FBgn0261397', 'FBgn0003149']
[54681.0]	[18451]	['FBgn0054041', 'FBgn0039776', 'FBgn0039780', 'FBgn0026190', 'FBgn0051015', 'FBgn0036795', 'FBgn0039782', 'FBgn0042182']
[2978, 30819, 30820, 3208, 80333.0, 51440, 7447, 23413]	[56461, 170638, 15444, 107477, 19674, 80906]	['FBgn0083228', 'FBgn0030897']
[8522, 11059, 23327, 23072, 84251]	[329152, 83814, 73094, 19201, 75788, 107568, 14457, 74015]	['FBgn0003557', 'FBgn0259174', 'FBgn0037702']
[56899, 8853, 116988, 116986, 51454, 116983]	[213990, 224650, 216190, 140500, 216439, 66808, 78618, 77531]	['FBgn0029092', 'FBgn0039056', 'FBgn0028509', 'FBgn0039075']
[81892, 10949, 138046, 221662]	[52202, 19383, 13164, 11991, 15382, 17975, 15384, 380773]	['FBgn0011666', 'FBgn0085383', 'FBgn0002780', 'FBgn0259935', 'FBgn0035063']
[40, 6604]	[66993, 83797, 20278]	['FBgn0020258', 'FBgn0035785', 'FBgn0053508', 'FBgn0034965', 'FBgn0030844', 'FBgn0039676', 'FBgn0039424']
[770, 771]	[80733, 76459, 12354, 12349, 230099, 12348]	['FBgn0039486', 'FBgn0038956', 'FBgn0030056', 'FBgn0037788', 'FBgn0052698', 'FBgn0027844', 'FBgn0027843']
[3682]	[104099, 109700, 16403, 319480, 213119, 16408, 16402]	['FBgn0001250', 'FBgn0003328', 'FBgn0034005']
[27115, 8622, 5138, 5141, 5142, 10846]	[23984, 29863, 18578, 207728, 18577, 18584, 218461]	['FBgn0085370', 'FBgn0259171', 'FBgn0038237']
[8038, 8745, 53616]	[11489, 11491, 11501, 23792, 280667, 280668, 11496]	['FBgn0051314', 'FBgn0259110', 'FBgn0039734', 'FBgn0039688']
[2115, 1607, 8526, 2002, 2119]	[14247, 217480, 13712, 13713, 13875, 13876, 23871]	['FBgn0020930', 'FBgn0039225', 'FBgn0005660', 'FBgn0085390']
[23457]	[56325, 18671]	['FBgn0004513', 'FBgn0023536', 'FBgn0010241', 'FBgn0030403', 'FBgn0004512', 'FBgn0035695']
[3761, 3765]	[16514, 16518, 16520, 16521, 16523, 211480]	['FBgn0039060', 'FBgn0039081', 'FBgn0039061', 'FBgn0032706']
[1463]	[13004, 71183, 56760, 232413, 12032]	['FBgn0261258', 'FBgn0030050', 'FBgn0031373', 'FBgn0035199', 'FBgn0040092', 'FBgn0053532']
[91]	[21812, 11477, 12166, 12167, 11482, 269275]	['FBgn0003716']
[163404, 9890, 54886, 64748, 79948]	[67916]	['FBgn0041087', 'FBgn0037163', 'FBgn0037167', 'FBgn0037164', 'FBgn0016078', 'FBgn0037166']
[253152]	[384214, 13849, 105501, 13850]	['FBgn0029801', 'FBgn0016715', 'FBgn0034406', 'FBgn0033226', 'FBgn0034405', 'FBgn0010053']
[284252, 57528, 386618]	[192192, 226823, 106931, 233107, 383348, 216858]	['FBgn0037758', 'FBgn0038839', 'FBgn0034636']
[8514, 6723, 7881]	[16497, 20810]	['FBgn0037974', 'FBgn0037973', 'FBgn0027552', 'FBgn0037723', 'FBgn0263220', 'FBgn0037975']
[23229, 50649]	[219140, 237611, 277360, 236915, 101497, 226970]	['FBgn0262868', 'FBgn0050115', 'FBgn0259744', 'FBgn0040068']
[998.0, 23221]	[170758, 11848, 11858, 56212, 246710, 104215]	['FBgn0014380', 'FBgn0014020', 'FBgn0039532', 'FBgn0083940', 'FBgn0036980']
[9260]	[67399]	['FBgn0083919', 'FBgn0035917', 'FBgn0085396', 'FBgn0011701', 'FBgn0259219', 'FBgn0085354']
[9568, 2550, 57512]	[239845, 241263, 54393, 11933]	['FBgn0085401', 'FBgn0015777', 'FBgn0027575', 'FBgn0051760', 'FBgn0031275', 'FBgn0260446']
[64409, 114805]	[270049, 212996, 71685, 230145, 271786]	['FBgn0027558', 'FBgn0051776', 'FBgn0031530', 'FBgn0050463', 'FBgn0034025', 'FBgn0051956']
[60, 10097, 55860, 10121]	[11459, 11461, 11465, 66713]	['FBgn0000046', 'FBgn0011742', 'FBgn0000042', 'FBgn0000045', 'FBgn0000044', 'FBgn0000047']
[51105]	[192195, 233904, 18193, 235626, 72895, 107823]	['FBgn0005386', 'FBgn0082831', 'FBgn0030486']
[1004, 1010, 1006, 1005, 120114, 1016]	[270120, 12561, 12564, 12565, 12552, 12562]	['FBgn0261574', 'FBgn0015609', 'FBgn0003391']
[4649]	[17922, 270163, 50932, 17909, 17910, 329421]	['FBgn0040299', 'FBgn0030252', 'FBgn0002938']
[2913, 2915, 2911]	[14816, 93746, 108069, 268934, 108071, 108073]	['FBgn0000206', 'FBgn0019985']
[23462, 57801]	[15213, 79362, 20893]	['FBgn0259938', 'FBgn0027788', 'FBgn0002733', 'FBgn0032741', 'FBgn0001168']
[23305]	[216739, 94180, 74205]	['FBgn0033733', 'FBgn0028519', 'FBgn0038734', 'FBgn0036821', 'FBgn0263120']
[2257, 2258, 2259, 2254]	[14174, 14166, 80903, 14169, 14171]	['FBgn0014135']
[10658.0, 10659, 60680, 56853, 11189]	[78784, 13046, 14007, 319586]	['FBgn0262350']
[22841, 6376]	[70769, 20312, 68652]	['FBgn0031264', 'FBgn0027335', 'FBgn0037137', 'FBgn0000181', 'FBgn0004584']
[26960]	[17101, 26422, 18201, 235627, 80877]	['FBgn0043362', 'FBgn0086911', 'FBgn0262110']
[79982, 56521, 80331.0]	[67035]	['FBgn0034091', 'FBgn0037151', 'FBgn0027654', 'FBgn0037882', 'FBgn0004179']
[23324]	[140481, 17158]	['FBgn0032068', 'FBgn0032066', 'FBgn0032069', 'FBgn0026616', 'FBgn0027611']
[3624]	[12161, 12162, 16323, 11705, 12156]	['FBgn0031461', 'FBgn0026199']
[9016, 9481]	[384071]	['FBgn0036199', 'FBgn0033904', 'FBgn0027610', 'FBgn0033903', 'FBgn0039674']
[94081]	[94281, 94280, 14057, 94282, 94279]	['FBgn0036843', 'FBgn0037239']
[5567]	[19108]	['FBgn0000273', 'FBgn0000274', 'FBgn0000721', 'FBgn0000489', 'FBgn0000442']
[6319]	[20250]	['FBgn0039754', 'FBgn0039756', 'FBgn0039755', 'FBgn0086687', 'FBgn0029172']
[1636]	[11421]	['FBgn0035076', 'FBgn0016122', 'FBgn0033366', 'FBgn0012037', 'FBgn0032536']
[8237]	[53376, 230484, 74841, 22217, 30941]	['FBgn0050421', 'FBgn0028476', 'FBgn0038862', 'FBgn0036913']
[23345]	[19041, 230872, 64009, 18810, 211484]	['FBgn0036480', 'FBgn0261593', 'FBgn0039152', 'FBgn0261836', 'FBgn0013733']
[144165, 4008]	[380928, 77569, 74103, 67803, 18175]	['FBgn0063485', 'FBgn0250819', 'FBgn0051531', 'FBgn0028642', 'FBgn0051534']
[164832, 83857, 10953]	[214899, 16468]	['FBgn0034542', 'FBgn0260749', 'FBgn0038488', 'FBgn0034692', 'FBgn0036004']
[57186, 23108, 5909, 26037]	[380711, 74206, 217692, 241694, 110351]	['FBgn0085403', 'FBgn0261388']
[1730, 64423]	[70435, 54004, 22379, 57778]	['FBgn0000256', 'FBgn0052138', 'FBgn0011202', 'FBgn0260963', 'FBgn0025641']
[2354, 55509]	[12916, 11909, 381319, 14282, 14284]	['FBgn0001297', 'FBgn0050420', 'FBgn0014467', 'FBgn0028550']
[9024, 57787.0, 23178, 4139, 5563]	[13728, 70661, 381979, 235344, 17691]	['FBgn0025625', 'FBgn0262103', 'FBgn0034950', 'FBgn0036544']
[3745, 3746, 27012, 3754, 3788]	[225030, 16500, 98741, 16538, 16539]	['FBgn0085395', 'FBgn0262593', 'FBgn0003386']
[3632, 389432]	[170835, 320825, 16332, 212111]	['FBgn0030761', 'FBgn0034179', 'FBgn0023508', 'FBgn0051163']
[6505, 6511]	[20512, 20514, 20511, 20510]	['FBgn0026439', 'FBgn0026438']
[7782]	[66500, 230810, 22782]	['FBgn0028516', 'FBgn0037000', 'FBgn0035432', 'FBgn0051860']
[5478, 5903.0]	[73075, 18087, 19386, 105675]	['FBgn0002936', 'FBgn0004432']
[51303, 2280, 2281, 2287]	[14227]	['FBgn0010470', 'FBgn0013954', 'FBgn0013269']
[5937, 1994]	[66469, 15568]	['FBgn0029933', 'FBgn0010263', 'FBgn0003659', 'FBgn0024987']
[2775]	[14673, 14681, 14674]	['FBgn0050054', 'FBgn0004435', 'FBgn0001104', 'FBgn0033756']
[7008, 3131, 1628]	[13170, 21685, 217082, 12606]	['FBgn0016694']
[55335, 8508, 283871]	[76429]	['FBgn0030348', 'FBgn0036759', 'FBgn0024995', 'FBgn0030724']
[5058, 5063, 57144, 56924]	[214230]	['FBgn0044826']
[63982]	[228432, 243634, 382014, 105722]	['FBgn0028879', 'FBgn0038721', 'FBgn0000152']
[3736, 3737, 3739]	[16485, 242151, 16492, 16493]	['FBgn0003380']
[412, 3423]	[74008]	['FBgn0038660', 'FBgn0052191', 'FBgn0035445', 'FBgn0036765']
[54438]	[328232, 71755]	['FBgn0031417', 'FBgn0031418', 'FBgn0027597', 'FBgn0032609']
[7111, 29767]	[50876, 93689, 50875, 21916]	['FBgn0082582']
[7482]	[22417, 22419, 22421, 22423]	['FBgn0031902', 'FBgn0031903']
[58512, 22839, 9228, 9229]	[244310, 242667]	['FBgn0033845']
[29114]	[21345, 21346, 29875, 404710]	['FBgn0002789', 'FBgn0035499']
[56341, 79133]	[381813]	['FBgn0032329', 'FBgn0038306', 'FBgn0033891', 'FBgn0037834']
[79698, 151126, 64393, 79750.0]	[22401, 241494, 26919]	['FBgn0051510']
[114569]	[67213, 17153, 105853]	['FBgn0030234', 'FBgn0030309', 'FBgn0261245', 'FBgn0029771']
[91584.0, 5362]	[235611, 67784, 140570, 18845]	['FBgn0025740']
[4293, 120892]	[233328, 26403, 66725, 269881]	['FBgn0041203', 'FBgn0030864', 'FBgn0039015']
[55607, 22874.0, 84687]	[240753, 217124, 243725, 109135]	['FBgn0010905', 'FBgn0085412']
[23136, 2036, 2037, 2035]	[269587, 13821]	['FBgn0010434']
[5601, 5594, 5597]	[26416, 50772, 225724, 26413]	['FBgn0003256', 'FBgn0046322']
[2047, 2043, 2045]	[13841, 13842, 13846, 16337]	['FBgn0038279', 'FBgn0013984', 'FBgn0032752']
[5218, 5127, 5128, 1020]	[12567, 69681, 237459, 12566]	['FBgn0016131', 'FBgn0005640']
[5463, 5453.0]	[19009, 18993, 18987, 18991]	['FBgn0030251', 'FBgn0086680', 'FBgn0004394']
[11022]	[100121, 11640, 83561, 72634]	['FBgn0038633', 'FBgn0027529', 'FBgn0031401', 'FBgn0029764']
[2977, 2982, 2983]	[60596, 234889]	['FBgn0038295', 'FBgn0013973', 'FBgn0038435', 'FBgn0038436']
[4674, 4675, 266812]	[53605]	['FBgn0015268']
[2785, 2786, 2788]	[14708]	['FBgn0004921', 'FBgn0028433']
[254887]	[27801, 66220, 503610]	['FBgn0027453']
[9671]	[320916, 654821, 14538]	['FBgn0030634', 'FBgn0015360']
[23236, 23228]	[18795, 18797, 269615]	['FBgn0262738', 'FBgn0004611']
[124359, 23466]	[494448, 75796]	['FBgn0034255', 'FBgn0035169', 'FBgn0027793']
[220164]	[13449, 27261, 114255]	['FBgn0032042']
[10501]	[20361, 218877, 20357]	['FBgn0011259', 'FBgn0016059', 'FBgn0250876']
[6416]	[26400, 26399, 100044509]	['FBgn0010303']
[11197]	[20187]	['FBgn0033791', 'FBgn0024245', 'FBgn0003390']
[116138]	[234825]	['FBgn0036301', 'FBgn0040344', 'FBgn0261477']
[114818, 11275]	[77113]	['FBgn0032485', 'FBgn0001301', 'FBgn0038475']
[11041, 9215]	[223827, 108902, 232313]	['FBgn0039273', 'FBgn0034959']
[114088]	[94090, 66949, 360213]	['FBgn0051721']
[490, 491, 492]	[67972, 11941]	['FBgn0259214']
[10769]	[18817, 20620, 216166]	['FBgn0003124']
[6456]	[17444, 20408]	['FBgn0038659', 'FBgn0004638', 'FBgn0027363']
[83394]	[56305, 327958, 19679]	['FBgn0003218']
[26051]	[67122, 228852, 232807]	['FBgn0036801', 'FBgn0005536']
[29922, 4830]	[79059]	['FBgn0028997', 'FBgn0039809', 'FBgn0000150']
[64478]	[12153, 239420, 94109]	['FBgn0052702', 'FBgn0004885']
[23158]	[54610, 108995, 103724]	['FBgn0037074', 'FBgn0037917']
[80777]	[338521]	['FBgn0032652', 'FBgn0029854', 'FBgn0033189']
[85465]	[28042]	['FBgn0033844', 'FBgn0031948', 'FBgn0053116']
[54715, 23543, 146713.0]	[52897, 268859]	['FBgn0052062']
[4738]	[27643, 22190]	['FBgn0003941', 'FBgn0003943', 'FBgn0003942']
[9254, 781, 55799]	[12294]	['FBgn0261041']
[55752]	[235072, 52398, 18951]	['FBgn0026361']
[9829]	[218294, 21961, 209039]	['FBgn0000244', 'FBgn0026379']
[7102]	[21912]	['FBgn0032943', 'FBgn0020372', 'FBgn0033629']
[9369.0, 9378, 9379]	[18191]	['FBgn0038975']
[862, 863]	[12398, 12395, 12396]	['FBgn0005636']
[6262, 6263]	[20192, 20190, 20191]	['FBgn0011286']
[25830]	[434264]	['FBgn0034888', 'FBgn0034889', 'FBgn0034887']
[317649, 143686, 1977]	[75747, 140742, 66892]	['FBgn0034897', 'FBgn0039622']
[3776, 3775]	[16529, 16525, 16526]	['FBgn0259242', 'FBgn0017561']
[4212]	[17536, 18771, 208076]	['FBgn0015919', 'FBgn0001235', 'FBgn0033749']
[56704, 57338]	[319984, 57339, 57340]	['FBgn0036016', 'FBgn0087005', 'FBgn0032129']
[3785, 3786, 56479]	[16536, 226922, 110862]	['FBgn0033494']
[406, 4862]	[11865, 18143]	['FBgn0023076', 'FBgn0023094', 'FBgn0261703']
[408]	[216869, 109689, 170735]	['FBgn0052683', 'FBgn0000121', 'FBgn0000120']
[610, 23416, 3757]	[16512, 380728, 238271]	['FBgn0003353', 'FBgn0000535']
[784, 785, 783]	[12295, 12296, 12297]	['FBgn0259822']
[8706, 10678, 10317]	[53625, 97884, 26877]	['FBgn0053145', 'FBgn0035558', 'FBgn0031986']
[901]	[12449, 12452, 218630]	['FBgn0000404', 'FBgn0015625', 'FBgn0039858']
[104, 55342]	[30947, 16201, 29819]	['FBgn0031951', 'FBgn0026086', 'FBgn0024807']
[126129]	[74114, 12647, 12894]	['FBgn0000303', 'FBgn0037440', 'FBgn0261862']
[5526, 5527.0, 5528]	[226849, 26931, 21770]	['FBgn0027492']
[2752]	[14645]	['FBgn0001142', 'FBgn0001145']
[396, 398]	[11857]	['FBgn0036921']
[4522]	[108156]	['FBgn0010222', 'FBgn0020385']
[90161, 266722]	[50787]	['FBgn0038755']
[50]	[11429]	['FBgn0024957', 'FBgn0024958']
[8195]	[12468, 59030]	['FBgn0037632']
[90293]	[245683, 74901]	['FBgn0031119']
[6775]	[20849, 20847]	['FBgn0016917']
[9348]	[15531, 17423]	['FBgn0020251']
[4121]	[17156, 230815]	['FBgn0051202']
[3964, 29094]	[16855]	['FBgn0031213']
[349152, 283417]	[233115]	['FBgn0030946']
[8912, 8911]	[58226]	['FBgn0029846']
[23237]	[11838]	['FBgn0033928', 'FBgn0033926']
[535]	[21871]	['FBgn0032373', 'FBgn0028670']
[51761, 10396]	[54667]	['FBgn0259221']
[488]	[11938]	['FBgn0263006', 'FBgn0052451']
[7443]	[101568, 22367]	['FBgn0039908']
[6386]	[53378, 228765]	['FBgn0051342']
[25999]	[105450, 381580]	['FBgn0020503']
[211]	[11656]	['FBgn0036208', 'FBgn0020764']
[10458]	[108100, 207495]	['FBgn0052082']
[9162, 8525]	[104418, 320127]	['FBgn0261549']
[955]	[12497, 93685]	['FBgn0024947']
[9926]	[225010]	['FBgn0036623', 'FBgn0036622']
[10299, 57574]	[381270]	['FBgn0035983']
[9828]	[207212]	['FBgn0262562', 'FBgn0030842']
[57446, 65009]	[234593, 29811]	['FBgn0027608']
[131474]	[72170]	['FBgn0085346', 'FBgn0260468']
[9498, 6508]	[54403, 269356]	['FBgn0036043']
[271]	[109674, 11717]	['FBgn0052626']
[57687, 284273]	[270097]	['FBgn0031500', 'FBgn0033188']
[23171]	[14555]	['FBgn0001128', 'FBgn0083985']
[23362, 5662]	[73728]	['FBgn0051158']
[54212]	[71096, 268534]	['FBgn0034135']
[4338]	[69564]	['FBgn0260229', 'FBgn0039280']
[5868]	[19345]	['FBgn0015372', 'FBgn0014010']
[2597]	[434128]	['FBgn0001091', 'FBgn0001092']
[1209]	[56457]	['FBgn0031590', 'FBgn0030456']
[55041]	[226971]	['FBgn0037380', 'FBgn0051555']
[5153]	[18574, 18575]	['FBgn0259225']
[201562.0, 51495]	[70757]	['FBgn0032394']
[23646]	[18807, 319455]	['FBgn0032923']
[51728]	[230734]	['FBgn0061362', 'FBgn0061361']
[10188]	[51789]	['FBgn0028484', 'FBgn0013955']
[6428]	[225027]	['FBgn0260944', 'FBgn0011305']
[23017]	[68212]	['FBgn0013305', 'FBgn0025692']
[539]	[60364]	['FBgn0086695', 'FBgn0016691']
[25953, 153364]	[68977]	['FBgn0031987']
[23708, 2935]	[14852]	['FBgn0020443']
[221692]	[218194, 74189]	['FBgn0052264']
[56954]	[52633]	['FBgn0024945', 'FBgn0037687']
[3419, 3421.0]	[170718]	['FBgn0039358']
[8497.0]	[68507, 71529]	['FBgn0034720']
[23531]	[75104]	['FBgn0029935', 'FBgn0038984']
[2172]	[12904, 18857]	['FBgn0037913']
[8715]	[329540]	['FBgn0028904', 'FBgn0028906']
[2941]	[14859, 54486]	['FBgn0010226']
[9530]	[67384, 70369]	['FBgn0086708']
[1327]	[84682]	['FBgn0033020', 'FBgn0032833']
[7416, 7419]	[22333]	['FBgn0004363']
[84448.0, 2039]	[231148]	['FBgn0260463']
[8470]	[20411, 234214]	['FBgn0033504']
[644150.0]	[68524, 330319]	['FBgn0243516']
[26507]	[83674, 94220]	['FBgn0262124']
[9522, 192683]	[107767]	['FBgn0040285']
[401190]	[52882]	['FBgn0031302', 'FBgn0085380']
[3706]	[228550]	['FBgn0030469', 'FBgn0085388']
[150763]	[215456, 14732]	['FBgn0027579']
[10087]	[231999]	['FBgn0027569', 'FBgn0030641']
[55344, 257068]	[403178]	['FBgn0036560', 'FBgn0032402']
[79772]	[272636, 78771]	['FBgn0034389']
[8502]	[18163]	['FBgn0260799', 'FBgn0031905']
[8720]	[56453, 100102]	['FBgn0037105']
[80727]	[57776, 78339]	['FBgn0261444', 'FBgn0015558']
[2026, 2023]	[433182, 13807]	['FBgn0000579']
[135]	[11539, 11540]	['FBgn0025633', 'FBgn0039747']
[51560]	[270192, 76877]	['FBgn0035255', 'FBgn0015797']
[10900, 154661]	[51799, 231125]	['FBgn0039492']
[476, 478]	[11928, 98660]	['FBgn0002921']
[2194]	[14104, 77219]	['FBgn0042627', 'FBgn0027571']
[1795, 9732]	[238130, 208869]	['FBgn0015513']
[90806, 84858]	[12457, 52477]	['FBgn0005771', 'FBgn0261808']
[10681, 2782]	[14693, 14697]	['FBgn0030011', 'FBgn0004623']
[673, 283455]	[109880, 333050]	['FBgn0015402']
[340146]	[242585, 76157]	['FBgn0052174', 'FBgn0042641']
[4753]	[21827, 16007]	['FBgn0031850', 'FBgn0052183']
[84649]	[67800, 668257]	['FBgn0033214', 'FBgn0033215']
[114928.0, 23732]	[230235]	['FBgn0034797', 'FBgn0034067']
[10873]	[109264, 107029]	['FBgn0002719', 'FBgn0029155']
[29799, 51646]	[77864, 383295]	['FBgn0030183']
[81832, 81831]	[74513, 246317]	['FBgn0035880', 'FBgn0052635']
[2571, 2572]	[246277]	['FBgn0004516', 'FBgn0036975']
[4900, 2596]	[64011]	['FBgn0013467', 'FBgn0037835']
[7905, 65055]	[52250, 70335]	['FBgn0033906', 'FBgn0261564']
[4842]	[18984, 18125]	['FBgn0015623', 'FBgn0011676']
[57181]	[72002, 213053]	['FBgn0036461', 'FBgn0024236']
[246330, 57162]	[93834, 67245]	['FBgn0025574']
[22849, 8120]	[21763, 12877]	['FBgn0262573', 'FBgn0004882']
[5297]	[21976, 224020]	['FBgn0026015', 'FBgn0040268']
[93986, 27086]	[14236, 108655]	['FBgn0029504', 'FBgn0262477']
[57168]	[72898]	['FBgn0034075']
[115]	[11515]	['FBgn0022710']
[25994]	[75689]	['FBgn0037890']
[4698]	[68202]	['FBgn0053493']
[81689]	[69046]	['FBgn0026666']
[9456]	[26556]	['FBgn0025777']
[57132]	[67064]	['FBgn0035589']
[340554]	[244871]	['FBgn0038769']
[5954]	[19672]	['FBgn0025682']
[54511]	[15356]	['FBgn0031877']
[399474]	[623230]	['FBgn0035171']
[22876]	[101490]	['FBgn0035195']
[9663]	[64899]	['FBgn0033269']
[1750]	[13396]	['FBgn0000157']
[153090]	[69601]	['FBgn0003969']
[11346]	[104027]	['FBgn0039897']
[7277]	[22145]	['FBgn0003886']
[57613]	[74525]	['FBgn0038725']
[10857]	[70804]	['FBgn0031367']
[10632]	[27425]	['FBgn0010612']
[29761]	[235323]	['FBgn0016756']
[388962]	[66162]	['FBgn0061360']
[112755]	[20908]	['FBgn0024980']
[140733]	[72899]	['FBgn0042135']
[56648]	[276770]	['FBgn0034967']
[10289]	[20918]	['FBgn0035423']
[23240]	[229473]	['FBgn0034060']
[10231]	[53901]	['FBgn0086370']
[390205]	[278795]	['FBgn0034655']
[114786]	[381560]	['FBgn0052579']
[47]	[104112]	['FBgn0020236']
[6119]	[68240]	['FBgn0030322']
[23025]	[382018]	['FBgn0025726']
[384]	[11847]	['FBgn0023535']
[9653]	[23908]	['FBgn0024230']
[4976]	[74143]	['FBgn0261276']
[5048]	[12181]	['FBgn0028744']
[5116]	[100986]	['FBgn0086690']
[3939]	[16832]	['FBgn0001258']
[2794]	[14670]	['FBgn0028274']
[27069]	[66092]	['FBgn0030263']
[201780]	[20493]	['FBgn0030638']
[5504]	[66849]	['FBgn0028429']
[23640]	[81500]	['FBgn0039296']
[254531]	[99010]	['FBgn0052699']
[54976]	[67326]	['FBgn0035896']
[23031]	[546071]	['FBgn0036511']
[5434]	[66420]	['FBgn0033571']
[2643]	[14528]	['FBgn0003162']
[84916]	[381693]	['FBgn0036578']
[134111]	[109161]	['FBgn0031896']
[7320]	[22210]	['FBgn0004436']
[8408]	[71742]	['FBgn0260945']
[146330]	[214931]	['FBgn0052085']
[26999]	[76884]	['FBgn0038320']
[22979]	[668212]	['FBgn0086784']
[9331]	[53418]	['FBgn0039625']
[55500]	[75320]	['FBgn0000536']
[144404]	[330189]	['FBgn0040384']
[64130]	[22342]	['FBgn0039269']
[7381]	[67530]	['FBgn0030733']
[23154]	[26562]	['FBgn0037447']
[11258]	[53598]	['FBgn0051174']
[90249]	[107449]	['FBgn0034013']
[2138]	[14050]	['FBgn0000320']
[6160]	[114641]	['FBgn0025286']
[1123]	[108699]	['FBgn0259216']
[10150]	[105559]	['FBgn0261642']
[5213]	[56421]	['FBgn0003071']
[56243]	[208618]	['FBgn0023531']
[5170]	[18607]	['FBgn0020386']
[7799]	[72843]	['FBgn0035625']
[4716]	[68342]	['FBgn0021967']
[8193]	[29861]	['FBgn0030502']
[148641]	[210027]	['FBgn0259222']
[9495]	[238276]	['FBgn0030841']
[8874]	[231002]	['FBgn0015803']
[9758]	[333605]	['FBgn0261859']
[79605]	[209966]	['FBgn0037633']
[9148]	[18011]	['FBgn0035059']
[151556]	[68526]	['FBgn0036741']
[55827]	[74106]	['FBgn0000057']
[22853]	[231876]	['FBgn0040505']
[23291]	[224619]	['FBgn0038532']
[55103]	[78255]	['FBgn0034158']
[57569]	[244867]	['FBgn0036518']
[202559]	[19317]	['FBgn0034731']
[4724]	[17993]	['FBgn0031021']
[]	[]	['FBgn0003748']
[]	[]	['FBgn0031077']
[]	[]	['FBgn0030575']
[]	[]	['FBgn0038803']
[]	[]	['FBgn0033174']
[]	[]	['FBgn0052687']
[]	[]	['FBgn0261385']
[]	[]	['FBgn0038746']
[5532]	[]	[]
[]	[]	['FBgn0000313']
[]	[74369]	[]
[]	[]	['FBgn0032230']
[8799]	[]	[]
[23312]	[]	[]
[]	[]	['FBgn0028699']
[]	[]	['FBgn0016119']
[]	[]	['FBgn0020912']
[]	[74349]	[]
[]	[320111]	[]
[8867]	[]	[]
[]	[]	['FBgn0039420']
[]	[320116]	[]
[]	[320165]	[]
[]	[74410]	[]
[7386]	[]	[]
[]	[]	['FBgn0086691']
[646658]	[]	[]
[]	[74760]	[]
[]	[]	['FBgn0087002']
[]	[69786]	[]
[]	[]	['FBgn0037330']
[]	[]	['FBgn0003965']
[]	[]	['FBgn0034380']
[]	[]	['FBgn0039300']
[]	[320299]	[]
[8999]	[]	[]
[]	[]	['FBgn0029857']
[]	[]	['FBgn0031888']
[]	[]	['FBgn0260444']
[]	[]	['FBgn0035264']
[64327]	[]	[]
[91057]	[]	[]
[]	[74522]	[]
[]	[]	['FBgn0044030']
[]	[]	['FBgn0039182']
[]	[]	['FBgn0032647']
[]	[]	['FBgn0038811']
[]	[]	['FBgn0034734']
[]	[]	['FBgn0024889']
[]	[]	['FBgn0013325']
[]	[74626]	[]
[]	[58244]	[]
[63891]	[]	[]
[]	[74616]	[]
[]	[271849]	[]
[]	[]	['FBgn0043575']
[]	[58230]	[]
[]	[353130]	[]
[]	[]	['FBgn0003268']
[]	[]	['FBgn0260746']
[]	[]	['FBgn0037094']
[]	[]	['FBgn0033453']
[9040]	[]	[]
[]	[58249]	[]
[]	[]	['FBgn0031069']
[58189]	[]	[]
[]	[12419]	[]
[]	[]	['FBgn0037898']
[]	[353236]	[]
[]	[64294]	[]
[]	[320538]	[]
[]	[]	['FBgn0030932']
[]	[238323]	[]
[7390]	[]	[]
[]	[]	['FBgn0035247']
[]	[74477]	[]
[]	[]	['FBgn0001324']
[]	[]	['FBgn0034372']
[]	[]	['FBgn0039537']
[]	[]	['FBgn0031604']
[]	[]	['FBgn0261403']
[]	[74464]	[]
[]	[320558]	[]
[]	[]	['FBgn0042119']
[]	[]	['FBgn0011674']
[]	[]	['FBgn0026409']
[]	[]	['FBgn0260965']
[9241]	[]	[]
[]	[]	['FBgn0038973']
[]	[107392]	[]
[]	[]	['FBgn0039183']
[9185]	[]	[]
[23765]	[]	[]
[]	[]	['FBgn0038952']
[]	[12454]	[]
[]	[]	['FBgn0051800']
[]	[]	['FBgn0250874']
[]	[]	['FBgn0037760']
[]	[]	['FBgn0011224']
[1534]	[]	[]
[57037]	[]	[]
[]	[]	['FBgn0036191']
[]	[74754]	[]
[]	[]	['FBgn0053178']
[]	[]	['FBgn0260450']
[]	[]	['FBgn0032698']
[]	[]	['FBgn0032191']
[]	[74322]	[]
[]	[73826]	[]
[57464]	[]	[]
[]	[]	['FBgn0033730']
[283638]	[]	[]
[]	[319601]	[]
[]	[]	['FBgn0045035']
[]	[73833]	[]
[]	[73827]	[]
[]	[]	['FBgn0060296']
[]	[]	['FBgn0033177']
[]	[]	['FBgn0014863']
[]	[106582]	[]
[]	[]	['FBgn0019960']
[139341]	[]	[]
[]	[]	['FBgn0005630']
[57415]	[]	[]
[]	[434246]	[]
[]	[106618]	[]
[]	[69655]	[]
[222865]	[]	[]
[]	[]	['FBgn0034968']
[]	[]	['FBgn0036612']
[57552]	[]	[]
[54836]	[]	[]
[4130]	[]	[]
[]	[]	['FBgn0038046']
[]	[73916]	[]
[]	[319675]	[]
[57515]	[]	[]
[]	[]	['FBgn0037046']
[57504]	[]	[]
[]	[]	['FBgn0011817']
[]	[]	['FBgn0028697']
[219844]	[]	[]
[]	[]	['FBgn0032160']
[]	[]	['FBgn0053158']
[]	[94232]	[]
[]	[319552]	[]
[]	[]	['FBgn0052260']
[]	[319710]	[]
[]	[]	['FBgn0031497']
[]	[57264]	[]
[]	[]	['FBgn0035355']
[]	[]	['FBgn0039752']
[]	[]	['FBgn0028952']
[]	[]	['FBgn0015816']
[]	[]	['FBgn0050349']
[]	[]	['FBgn0027564']
[]	[73608]	[]
[]	[]	['FBgn0035245']
[1345]	[]	[]
[]	[]	['FBgn0035600']
[]	[73598]	[]
[]	[]	['FBgn0026679']
[]	[]	['FBgn0037001']
[4072]	[]	[]
[]	[]	['FBgn0031874']
[]	[]	['FBgn0032084']
[]	[]	['FBgn0036502']
[]	[434215]	[]
[]	[106489]	[]
[]	[]	['FBgn0015323']
[]	[]	['FBgn0039972']
[]	[]	['FBgn0000459']
[]	[73754]	[]
[]	[]	['FBgn0003159']
[]	[73747]	[]
[]	[]	['FBgn0028538']
[]	[]	['FBgn0030981']
[]	[73673]	[]
[]	[]	['FBgn0261269']
[]	[73712]	[]
[157285]	[]	[]
[]	[73699]	[]
[]	[434130]	[]
[122830]	[]	[]
[]	[]	['FBgn0035901']
[57554]	[]	[]
[57575]	[]	[]
[]	[]	['FBgn0011705']
[6904]	[]	[]
[]	[]	['FBgn0034225']
[]	[]	['FBgn0033538']
[]	[]	['FBgn0037874']
[]	[]	['FBgn0038447']
[]	[319974]	[]
[]	[]	['FBgn0032705']
[]	[319955]	[]
[]	[69709]	[]
[]	[]	['FBgn0028491']
[]	[]	['FBgn0038256']
[]	[]	['FBgn0037547']
[]	[]	['FBgn0259994']
[]	[74164]	[]
[]	[]	['FBgn0033548']
[]	[74158]	[]
[]	[74153]	[]
[]	[]	['FBgn0033302']
[]	[74239]	[]
[]	[74142]	[]
[]	[]	['FBgn0033296']
[]	[74320]	[]
[253980]	[]	[]
[]	[74315]	[]
[]	[74309]	[]
[53344]	[]	[]
[8766]	[]	[]
[]	[57914]	[]
[]	[74288]	[]
[]	[74252]	[]
[]	[74284]	[]
[6919]	[]	[]
[139818]	[]	[]
[291]	[]	[]
[]	[100037278]	[]
[]	[320027]	[]
[]	[57869]	[]
[]	[319909]	[]
[]	[319899]	[]
[8428]	[]	[]
[57614]	[]	[]
[]	[217138]	[]
[]	[74026]	[]
[]	[]	['FBgn0030310']
[]	[]	['FBgn0053123']
[]	[23994]	[]
[]	[]	['FBgn0031632']
[]	[319765]	[]
[]	[]	['FBgn0034938']
[]	[434484]	[]
[]	[]	['FBgn0023513']
[]	[]	['FBgn0034964']
[]	[319742]	[]
[]	[]	['FBgn0043791']
[]	[]	['FBgn0029929']
[]	[]	['FBgn0027341']
[57583]	[]	[]
[]	[]	['FBgn0039868']
[254263]	[]	[]
[]	[]	['FBgn0030519']
[]	[]	['FBgn0037941']
[]	[]	['FBgn0039359']
[]	[]	['FBgn0030608']
[27018]	[]	[]
[]	[]	['FBgn0038042']
[10651]	[]	[]
[]	[]	['FBgn0085435']
[]	[74096]	[]
[]	[74091]	[]
[]	[]	['FBgn0033446']
[221545]	[]	[]
[56675]	[]	[]
[]	[74080]	[]
[57692]	[]	[]
[8539]	[]	[]
[57689]	[]	[]
[8533]	[]	[]
[9296]	[]	[]
[26034]	[]	[]
[]	[]	['FBgn0036486']
[10159]	[]	[]
[]	[]	['FBgn0034707']
[]	[]	['FBgn0038733']
[26258]	[]	[]
[10094]	[]	[]
[]	[75656]	[]
[]	[75659]	[]
[]	[]	['FBgn0038257']
[]	[75669]	[]
[]	[59308]	[]
[]	[]	['FBgn0031760']
[]	[67230]	[]
[]	[]	['FBgn0034496']
[]	[]	['FBgn0010198']
[]	[]	['FBgn0029942']
[]	[]	['FBgn0030041']
[]	[]	['FBgn0038504']
[]	[]	['FBgn0038478']
[]	[]	['FBgn0033677']
[26580]	[]	[]
[]	[]	['FBgn0004391']
[]	[]	['FBgn0260857']
[]	[]	['FBgn0029507']
[]	[]	['FBgn0020633']
[]	[75758]	[]
[]	[]	['FBgn0033184']
[]	[75763]	[]
[]	[75764]	[]
[]	[]	['FBgn0015589']
[]	[]	['FBgn0036223']
[]	[]	['FBgn0023477']
[]	[]	['FBgn0039648']
[]	[]	['FBgn0085486']
[646113]	[]	[]
[]	[]	['FBgn0036187']
[]	[]	['FBgn0262869']
[]	[59079]	[]
[]	[]	['FBgn0000307']
[]	[75469]	[]
[]	[]	['FBgn0033902']
[]	[]	['FBgn0036169']
[9951]	[]	[]
[4696]	[]	[]
[]	[211922]	[]
[]	[]	['FBgn0002031']
[]	[]	['FBgn0023083']
[]	[59126]	[]
[28969]	[]	[]
[]	[]	['FBgn0053205']
[]	[26377]	[]
[]	[75530]	[]
[]	[]	['FBgn0038701']
[]	[]	['FBgn0040060']
[]	[75540]	[]
[]	[]	['FBgn0027518']
[]	[67205]	[]
[]	[26404]	[]
[]	[]	['FBgn0030894']
[]	[26406]	[]
[]	[]	['FBgn0036354']
[]	[]	['FBgn0033760']
[]	[]	['FBgn0261575']
[]	[]	['FBgn0053505']
[]	[]	['FBgn0036117']
[50861]	[]	[]
[]	[75799]	[]
[]	[386753]	[]
[]	[]	['FBgn0261552']
[]	[]	['FBgn0032820']
[]	[]	['FBgn0005533']
[]	[108735]	[]
[10438]	[]	[]
[10440]	[]	[]
[]	[223433]	[]
[]	[]	['FBgn0023489']
[]	[20855]	[]
[]	[]	['FBgn0031228']
[]	[75985]	[]
[]	[]	['FBgn0035348']
[]	[]	['FBgn0028979']
[]	[]	['FBgn0037683']
[]	[223453]	[]
[10479]	[]	[]
[]	[239647]	[]
[10494]	[]	[]
[]	[]	['FBgn0034645']
[]	[26887]	[]
[]	[223499]	[]
[]	[76051]	[]
[]	[76055]	[]
[10522]	[]	[]
[]	[]	['FBgn0019936']
[]	[231130]	[]
[]	[]	['FBgn0038742']
[]	[233863]	[]
[]	[]	['FBgn0000250']
[]	[]	['FBgn0034786']
[]	[76089]	[]
[]	[]	['FBgn0031126']
[]	[73720]	[]
[]	[]	['FBgn0032715']
[]	[]	['FBgn0037896']
[]	[214704]	[]
[]	[]	['FBgn0032261']
[]	[]	['FBgn0028336']
[345778]	[]	[]
[10286]	[]	[]
[]	[239667]	[]
[]	[]	['FBgn0036402']
[9910]	[]	[]
[10314]	[]	[]
[9912]	[]	[]
[]	[]	['FBgn0010638']
[]	[]	['FBgn0052772']
[]	[]	['FBgn0032198']
[]	[]	['FBgn0039778']
[]	[108645]	[]
[]	[18108]	[]
[]	[108657]	[]
[]	[239731]	[]
[]	[67263]	[]
[]	[20842]	[]
[]	[]	['FBgn0037153']
[]	[75906]	[]
[]	[]	['FBgn0010329']
[]	[]	['FBgn0034614']
[]	[]	['FBgn0030026']
[11034]	[]	[]
[]	[]	['FBgn0036691']
[]	[]	['FBgn0038172']
[]	[108705]	[]
[9922]	[]	[]
[]	[75453]	[]
[]	[]	['FBgn0038168']
[]	[75050]	[]
[9475]	[]	[]
[]	[]	['FBgn0033985']
[]	[217303]	[]
[]	[140559]	[]
[]	[]	['FBgn0085342']
[25876]	[]	[]
[]	[]	['FBgn0031936']
[]	[75033]	[]
[]	[]	['FBgn0035904']
[]	[]	['FBgn0050345']
[]	[320799]	[]
[]	[]	['FBgn0035401']
[]	[140579]	[]
[]	[320806]	[]
[9515]	[]	[]
[29780]	[]	[]
[]	[]	['FBgn0035422']
[25907]	[]	[]
[]	[]	['FBgn0052549']
[222537]	[]	[]
[9547]	[]	[]
[]	[75087]	[]
[9556]	[]	[]
[25941]	[]	[]
[]	[]	['FBgn0262509']
[]	[]	['FBgn0013334']
[]	[]	['FBgn0039993']
[9581]	[]	[]
[]	[]	['FBgn0031048']
[25977]	[]	[]
[9472]	[]	[]
[25854]	[]	[]
[]	[107770]	[]
[25849]	[]	[]
[]	[]	['FBgn0031549']
[26128]	[]	[]
[]	[]	['FBgn0033507']
[]	[]	['FBgn0036826']
[]	[]	['FBgn0003656']
[]	[]	['FBgn0037843']
[]	[]	['FBgn0004133']
[]	[320655]	[]
[]	[271508]	[]
[9375]	[]	[]
[]	[]	['FBgn0024227']
[]	[]	['FBgn0014903']
[]	[107684]	[]
[9382]	[]	[]
[]	[]	['FBgn0002036']
[]	[]	['FBgn0250850']
[]	[12489]	[]
[]	[]	['FBgn0041342']
[]	[]	['FBgn0028582']
[]	[320712]	[]
[2762]	[]	[]
[]	[]	['FBgn0033475']
[80762]	[]	[]
[]	[107746]	[]
[]	[]	['FBgn0036146']
[]	[]	['FBgn0038814']
[25837]	[]	[]
[]	[238831]	[]
[]	[]	['FBgn0037877']
[]	[239167]	[]
[]	[]	['FBgn0260639']
[]	[170952]	[]
[]	[108124]	[]
[]	[]	['FBgn0029502']
[]	[]	['FBgn0037901']
[]	[]	['FBgn0031764']
[9762]	[]	[]
[]	[]	['FBgn0032002']
[]	[]	['FBgn0004867']
[]	[]	['FBgn0026206']
[]	[108083]	[]
[]	[108089]	[]
[]	[239170]	[]
[1633]	[]	[]
[84518]	[]	[]
[]	[]	['FBgn0002524']
[]	[]	['FBgn0000477']
[]	[]	['FBgn0039338']
[]	[75146]	[]
[]	[]	['FBgn0035909']
[8030]	[]	[]
[]	[]	['FBgn0261509']
[]	[58991]	[]
[56256]	[]	[]
[127254]	[]	[]
[6875]	[]	[]
[]	[]	['FBgn0000719']
[]	[]	['FBgn0033830']
[]	[]	['FBgn0032162']
[]	[59027]	[]
[]	[]	['FBgn0033476']
[]	[59035]	[]
[]	[75420]	[]
[]	[99929]	[]
[113802]	[]	[]
[9746]	[]	[]
[]	[]	['FBgn0033354']
[221336]	[]	[]
[]	[]	['FBgn0039768']
[]	[]	['FBgn0052641']
[]	[107932]	[]
[]	[]	['FBgn0036838']
[]	[80795]	[]
[]	[75180]	[]
[9645]	[]	[]
[]	[]	['FBgn0004396']
[9648]	[]	[]
[26033]	[]	[]
[]	[]	['FBgn0053506']
[]	[56222]	[]
[]	[]	['FBgn0250815']
[9659]	[]	[]
[]	[107975]	[]
[]	[]	['FBgn0034117']
[]	[75216]	[]
[]	[]	['FBgn0035162']
[]	[]	['FBgn0022959']
[140767]	[]	[]
[]	[435684]	[]
[]	[]	['FBgn0026879']
[]	[321000]	[]
[26090]	[]	[]
[]	[]	['FBgn0000239']
[]	[230996]	[]
[]	[]	['FBgn0033093']
[9737]	[]	[]
[]	[]	['FBgn0020272']
[]	[56409]	[]
[]	[]	['FBgn0015565']
[22822]	[]	[]
[]	[]	['FBgn0085220']
[]	[399603]	[]
[]	[]	['FBgn0036763']
[]	[]	['FBgn0000078']
[]	[22780]	[]
[3797]	[]	[]
[]	[77609]	[]
[3798]	[]	[]
[]	[]	['FBgn0036479']
[]	[]	['FBgn0039341']
[]	[]	['FBgn0043005']
[]	[]	['FBgn0037405']
[]	[353326]	[]
[]	[71972]	[]
[]	[71978]	[]
[22941]	[]	[]
[]	[547127]	[]
[]	[]	['FBgn0039137']
[]	[]	['FBgn0038381']
[22924]	[]	[]
[]	[]	['FBgn0035665']
[]	[]	['FBgn0086909']
[55638]	[]	[]
[]	[]	['FBgn0039349']
[55653]	[]	[]
[]	[]	['FBgn0010591']
[22902]	[]	[]
[22911]	[]	[]
[22920]	[]	[]
[]	[72075]	[]
[]	[]	['FBgn0261609']
[]	[22761]	[]
[]	[71912]	[]
[]	[22759]	[]
[]	[71780]	[]
[]	[]	['FBgn0032889']
[]	[]	['FBgn0030588']
[]	[]	['FBgn0260657']
[]	[]	['FBgn0033936']
[127703]	[]	[]
[]	[]	['FBgn0030612']
[]	[]	['FBgn0263102']
[]	[71820]	[]
[]	[]	['FBgn0085466']
[9240]	[]	[]
[]	[]	['FBgn0029818']
[]	[22687]	[]
[55466]	[]	[]
[]	[]	['FBgn0037445']
[]	[]	['FBgn0016794']
[]	[]	['FBgn0033483']
[]	[]	['FBgn0050499']
[6324]	[]	[]
[]	[71864]	[]
[221710]	[]	[]
[]	[]	['FBgn0031627']
[]	[]	['FBgn0037906']
[]	[]	['FBgn0034276']
[23125]	[]	[]
[57496]	[]	[]
[]	[]	['FBgn0053139']
[]	[268510]	[]
[]	[]	['FBgn0260866']
[]	[]	['FBgn0037778']
[]	[]	['FBgn0035968']
[]	[]	['FBgn0042185']
[]	[]	['FBgn0032076']
[]	[]	['FBgn0035977']
[]	[]	['FBgn0031092']
[]	[]	['FBgn0024997']
[]	[268721]	[]
[55859]	[]	[]
[55863]	[]	[]
[]	[268857]	[]
[]	[]	['FBgn0039335']
[]	[]	['FBgn0003189']
[]	[]	['FBgn0025700']
[]	[]	['FBgn0028479']
[]	[]	['FBgn0011693']
[]	[]	['FBgn0032596']
[]	[]	['FBgn0021874']
[121457]	[]	[]
[]	[80283]	[]
[]	[]	['FBgn0000588']
[63934]	[]	[]
[23162]	[]	[]
[]	[55938]	[]
[]	[12054]	[]
[]	[55948]	[]
[]	[170639]	[]
[]	[]	['FBgn0004698']
[]	[18230]	[]
[9326]	[]	[]
[]	[55960]	[]
[6812]	[]	[]
[]	[]	['FBgn0000055']
[]	[72354]	[]
[]	[]	['FBgn0035620']
[23047]	[]	[]
[]	[]	['FBgn0035231']
[]	[]	['FBgn0027835']
[]	[72102]	[]
[]	[]	['FBgn0260986']
[]	[72113]	[]
[]	[72114]	[]
[]	[104886]	[]
[]	[]	['FBgn0036035']
[55737]	[]	[]
[203197]	[]	[]
[6595]	[]	[]
[22980]	[]	[]
[6597]	[]	[]
[]	[432582]	[]
[]	[]	['FBgn0034390']
[]	[]	['FBgn0021761']
[6605]	[]	[]
[137682]	[]	[]
[6620]	[]	[]
[]	[]	['FBgn0039094']
[]	[]	['FBgn0005427']
[23015]	[]	[]
[]	[170472]	[]
[]	[268783]	[]
[121256]	[]	[]
[]	[432628]	[]
[]	[]	['FBgn0010709']
[55800]	[]	[]
[]	[]	['FBgn0034215']
[]	[73327]	[]
[]	[72190]	[]
[]	[22626]	[]
[]	[71770]	[]
[1337]	[]	[]
[]	[]	['FBgn0038173']
[]	[]	['FBgn0024733']
[]	[22163]	[]
[]	[11886]	[]
[]	[71326]	[]
[]	[]	['FBgn0011020']
[5805]	[]	[]
[5810]	[]	[]
[54968]	[]	[]
[]	[]	['FBgn0032482']
[]	[]	['FBgn0030518']
[]	[22213]	[]
[]	[]	['FBgn0036831']
[]	[]	['FBgn0030177']
[5862]	[]	[]
[]	[]	['FBgn0061359']
[]	[]	['FBgn0027791']
[]	[574418]	[]
[]	[104175]	[]
[5874]	[]	[]
[]	[]	['FBgn0029785']
[8379]	[]	[]
[55030]	[]	[]
[439921]	[]	[]
[]	[22264]	[]
[]	[]	['FBgn0036813']
[]	[]	['FBgn0035799']
[]	[381823]	[]
[]	[]	['FBgn0038924']
[]	[]	['FBgn0033915']
[]	[]	['FBgn0042650']
[]	[71306]	[]
[55294]	[]	[]
[170261]	[]	[]
[29106]	[]	[]
[]	[234959]	[]
[]	[]	['FBgn0031824']
[]	[]	['FBgn0039690']
[]	[]	['FBgn0038136']
[]	[71137]	[]
[5604]	[]	[]
[]	[]	['FBgn0044452']
[5618]	[]	[]
[]	[22003]	[]
[]	[22004]	[]
[5621]	[]	[]
[]	[]	['FBgn0033134']
[]	[]	['FBgn0003346']
[]	[]	['FBgn0034439']
[]	[]	['FBgn0028577']
[91298]	[]	[]
[]	[71943]	[]
[5686]	[]	[]
[54839]	[]	[]
[]	[]	['FBgn0003482']
[]	[71240]	[]
[]	[]	['FBgn0053531']
[]	[]	['FBgn0036356']
[]	[]	['FBgn0001285']
[5718]	[]	[]
[]	[]	['FBgn0039016']
[]	[71268]	[]
[80145]	[]	[]
[]	[]	['FBgn0039857']
[]	[71446]	[]
[]	[]	['FBgn0263113']
[]	[380601]	[]
[91137]	[]	[]
[285533]	[]	[]
[]	[69281]	[]
[55250]	[]	[]
[]	[]	['FBgn0030658']
[]	[]	['FBgn0032634']
[6750]	[]	[]
[]	[104416]	[]
[]	[]	['FBgn0011225']
[]	[]	['FBgn0053533']
[]	[]	['FBgn0039697']
[]	[]	['FBgn0023512']
[]	[71667]	[]
[]	[]	['FBgn0016693']
[]	[]	['FBgn0028645']
[]	[]	['FBgn0037842']
[]	[]	['FBgn0036756']
[55321]	[]	[]
[]	[]	['FBgn0053303']
[]	[]	['FBgn0052076']
[]	[]	['FBgn0041710']
[]	[71720]	[]
[]	[]	['FBgn0039241']
[]	[]	['FBgn0032136']
[]	[235567]	[]
[]	[52915]	[]
[]	[333883]	[]
[]	[]	['FBgn0033638']
[]	[235587]	[]
[]	[]	['FBgn0037880']
[]	[]	['FBgn0038473']
[134957]	[]	[]
[]	[]	['FBgn0034087']
[]	[]	['FBgn0033224']
[]	[270802]	[]
[]	[]	['FBgn0052479']
[]	[22319]	[]
[]	[]	['FBgn0021995']
[]	[]	['FBgn0041182']
[]	[104248]	[]
[]	[]	['FBgn0038716']
[]	[]	['FBgn0037737']
[]	[104263]	[]
[]	[22346]	[]
[]	[]	['FBgn0020756']
[]	[]	['FBgn0033717']
[]	[]	['FBgn0035911']
[]	[260409]	[]
[]	[]	['FBgn0025592']
[]	[218975]	[]
[]	[]	['FBgn0261555']
[]	[]	['FBgn0259736']
[]	[22380]	[]
[]	[317757]	[]
[]	[]	['FBgn0051414']
[]	[]	['FBgn0028970']
[55190]	[]	[]
[]	[]	['FBgn0036686']
[]	[]	['FBgn0034618']
[]	[]	['FBgn0053296']
[]	[]	['FBgn0030629']
[]	[]	['FBgn0003067']
[55212]	[]	[]
[]	[]	['FBgn0046692']
[]	[72355]	[]
[]	[]	['FBgn0030796']
[55975]	[]	[]
[]	[]	['FBgn0016034']
[]	[]	['FBgn0034258']
[]	[]	['FBgn0038105']
[]	[94089]	[]
[286097]	[]	[]
[]	[]	['FBgn0262871']
[]	[23956]	[]
[]	[]	['FBgn0021768']
[129607]	[]	[]
[375056]	[]	[]
[]	[]	['FBgn0050424']
[]	[23999]	[]
[55885]	[]	[]
[]	[]	['FBgn0036333']
[]	[]	['FBgn0029736']
[]	[]	['FBgn0031662']
[]	[]	['FBgn0033883']
[]	[56809]	[]
[]	[]	['FBgn0032919']
[286205]	[]	[]
[]	[]	['FBgn0035265']
[]	[]	['FBgn0023441']
[400916]	[]	[]
[]	[269854]	[]
[]	[24105]	[]
[]	[]	['FBgn0039114']
[]	[24111]	[]
[]	[]	['FBgn0038135']
[23074]	[]	[]
[]	[]	['FBgn0000056']
[]	[]	['FBgn0035476']
[]	[56711]	[]
[]	[23942]	[]
[]	[]	['FBgn0004607']
[]	[]	['FBgn0036557']
[]	[72982]	[]
[]	[384281]	[]
[]	[23834]	[]
[]	[216965]	[]
[]	[353499]	[]
[]	[]	['FBgn0031821']
[]	[269608]	[]
[]	[]	['FBgn0030208']
[]	[]	['FBgn0035204']
[]	[23857]	[]
[23092]	[]	[]
[]	[73024]	[]
[]	[23879]	[]
[]	[269642]	[]
[]	[23885]	[]
[3981]	[]	[]
[7504]	[]	[]
[]	[68991]	[]
[]	[23892]	[]
[]	[23894]	[]
[]	[]	['FBgn0026196']
[]	[]	['FBgn0263025']
[]	[]	['FBgn0010411']
[]	[]	['FBgn0002872']
[7531]	[]	[]
[]	[73068]	[]
[7533]	[]	[]
[]	[]	['FBgn0034879']
[]	[23919]	[]
[]	[]	['FBgn0031040']
[56896]	[]	[]
[]	[]	['FBgn0026375']
[]	[]	['FBgn0262619']
[]	[]	['FBgn0035953']
[]	[]	['FBgn0032816']
[375612]	[]	[]
[]	[]	['FBgn0038788']
[]	[]	['FBgn0037339']
[]	[57080]	[]
[]	[]	['FBgn0034259']
[]	[237313]	[]
[]	[]	['FBgn0085453']
[]	[]	['FBgn0261262']
[]	[]	['FBgn0036964']
[]	[]	['FBgn0031937']
[]	[433940]	[]
[]	[]	['FBgn0003209']
[]	[319263]	[]
[]	[]	['FBgn0052409']
[]	[]	['FBgn0015245']
[]	[]	['FBgn0051053']
[]	[20444]	[]
[]	[319278]	[]
[4061]	[]	[]
[]	[]	['FBgn0052050']
[4062]	[]	[]
[]	[]	['FBgn0024996']
[57156]	[]	[]
[]	[270151]	[]
[]	[73545]	[]
[]	[]	['FBgn0028342']
[]	[270162]	[]
[]	[]	['FBgn0004102']
[]	[106205]	[]
[]	[]	['FBgn0052392']
[7884]	[]	[]
[]	[]	['FBgn0034733']
[]	[]	['FBgn0023511']
[]	[73288]	[]
[24141]	[]	[]
[]	[106064]	[]
[24145]	[]	[]
[]	[]	['FBgn0053214']
[]	[]	['FBgn0041205']
[]	[]	['FBgn0029823']
[]	[]	['FBgn0003638']
[]	[]	['FBgn0035383']
[]	[384619]	[]
[]	[]	['FBgn0005672']
[]	[]	['FBgn0021814']
[]	[]	['FBgn0263278']
[]	[]	['FBgn0035207']
[]	[]	['FBgn0038275']
[]	[433809]	[]
[]	[]	['FBgn0086679']
[]	[]	['FBgn0038196']
[]	[237211]	[]
[]	[]	['FBgn0034310']
[]	[20422]	[]
[7857]	[]	[]
[]	[319160]	[]
[122553]	[]	[]
[]	[319162]	[]
[1353]	[]	[]
[4043]	[]	[]
[]	[]	['FBgn0036834']
[]	[269585]	[]
[]	[269582]	[]
[]	[]	['FBgn0031421']
[]	[56210]	[]
[]	[72507]	[]
[]	[]	['FBgn0032864']
[]	[]	['FBgn0025640']
[]	[72522]	[]
[151354]	[]	[]
[]	[]	['FBgn0035266']
[]	[77626]	[]
[]	[72556]	[]
[]	[]	['FBgn0037315']
[]	[]	['FBgn0015527']
[]	[]	['FBgn0039283']
[]	[56187]	[]
[]	[320661]	[]
[]	[105348]	[]
[]	[56226]	[]
[]	[]	['FBgn0035374']
[]	[]	['FBgn0262872']
[]	[]	['FBgn0022343']
[]	[269233]	[]
[7094]	[]	[]
[23479]	[]	[]
[285172]	[]	[]
[]	[]	['FBgn0261815']
[]	[252870]	[]
[]	[433099]	[]
[]	[72654]	[]
[56271]	[]	[]
[23504]	[]	[]
[94030]	[]	[]
[138199]	[]	[]
[]	[72503]	[]
[]	[]	['FBgn0000099']
[]	[72500]	[]
[]	[]	['FBgn0001187']
[]	[]	['FBgn0036056']
[6844]	[]	[]
[6855]	[]	[]
[]	[]	['FBgn0038745']
[]	[72397]	[]
[]	[72401]	[]
[]	[56018]	[]
[]	[170707]	[]
[]	[170711]	[]
[23261]	[]	[]
[]	[]	['FBgn0032779']
[]	[56032]	[]
[]	[105193]	[]
[]	[]	['FBgn0033132']
[727800]	[]	[]
[22996]	[]	[]
[]	[66687]	[]
[]	[269060]	[]
[]	[72475]	[]
[]	[]	['FBgn0027535']
[285016]	[]	[]
[]	[]	['FBgn0032810']
[]	[]	['FBgn0035431']
[]	[]	['FBgn0026593']
[23335]	[]	[]
[]	[383787]	[]
[]	[432940]	[]
[]	[]	['FBgn0033725']
[56112]	[]	[]
[]	[]	['FBgn0036031']
[]	[56284]	[]
[]	[56289]	[]
[]	[]	['FBgn0034532']
[]	[56456]	[]
[]	[56462]	[]
[]	[56469]	[]
[]	[]	['FBgn0261015']
[]	[]	['FBgn0033447']
[]	[]	['FBgn0030955']
[]	[94064]	[]
[]	[]	['FBgn0028644']
[]	[]	['FBgn0021872']
[23741]	[]	[]
[55347]	[]	[]
[]	[]	['FBgn0031713']
[]	[]	['FBgn0086697']
[]	[]	['FBgn0086445']
[7385]	[]	[]
[]	[]	['FBgn0259934']
[]	[]	['FBgn0036008']
[7402]	[]	[]
[114815]	[]	[]
[]	[23789]	[]
[]	[]	['FBgn0036144']
[]	[]	['FBgn0085385']
[]	[]	['FBgn0043578']
[]	[72949]	[]
[]	[236790]	[]
[]	[]	['FBgn0026417']
[]	[23807]	[]
[]	[]	['FBgn0038845']
[]	[]	['FBgn0036298']
[]	[]	['FBgn0262516']
[]	[]	['FBgn0033139']
[293]	[]	[]
[]	[56447]	[]
[]	[]	['FBgn0034438']
[]	[72699]	[]
[]	[]	['FBgn0032414']
[7172]	[]	[]
[]	[269328]	[]
[]	[72195]	[]
[]	[]	['FBgn0026741']
[23585]	[]	[]
[]	[72739]	[]
[60496]	[]	[]
[]	[56358]	[]
[]	[]	['FBgn0051633']
[]	[252972]	[]
[]	[]	['FBgn0039637']
[]	[]	['FBgn0062517']
[]	[56399]	[]
[]	[56401]	[]
[]	[]	['FBgn0003479']
[]	[269400]	[]
[]	[]	['FBgn0032925']
[]	[72795]	[]
[7260]	[]	[]
[23057]	[]	[]
[]	[]	['FBgn0033882']
[1213]	[]	[]
[]	[]	['FBgn0033836']
[]	[56436]	[]
[]	[56438]	[]
[11154]	[]	[]
[]	[26940]	[]
[]	[]	['FBgn0030718']
[]	[26943]	[]
[80034]	[]	[]
[]	[]	['FBgn0262601']
[117154]	[]	[]
[]	[]	['FBgn0032453']
[]	[]	['FBgn0037186']
[]	[30839]	[]
[]	[30843]	[]
[]	[100715]	[]
[]	[243846]	[]
[10302]	[]	[]
[]	[]	['FBgn0035811']
[]	[]	['FBgn0086450']
[]	[14489]	[]
[80028]	[]	[]
[]	[]	['FBgn0032431']
[]	[231803]	[]
[]	[]	['FBgn0031299']
[]	[]	['FBgn0261985']
[]	[]	['FBgn0038601']
[]	[14533]	[]
[]	[]	['FBgn0033431']
[]	[211151]	[]
[]	[260305]	[]
[]	[]	['FBgn0005593']
[]	[]	['FBgn0034817']
[]	[]	['FBgn0032988']
[]	[215418]	[]
[144423]	[]	[]
[]	[14573]	[]
[]	[407790]	[]
[]	[]	['FBgn0003041']
[]	[]	['FBgn0013948']
[]	[]	['FBgn0039451']
[]	[]	['FBgn0051445']
[]	[]	['FBgn0005659']
[]	[100683]	[]
[5110]	[]	[]
[79817]	[]	[]
[]	[]	['FBgn0033454']
[]	[237221]	[]
[]	[227298]	[]
[440145]	[]	[]
[]	[]	['FBgn0032470']
[]	[]	['FBgn0061492']
[]	[]	['FBgn0034282']
[]	[227326]	[]
[]	[14339]	[]
[]	[]	['FBgn0030668']
[]	[]	['FBgn0263256']
[]	[]	['FBgn0027360']
[]	[]	['FBgn0019982']
[]	[]	['FBgn0010926']
[]	[]	['FBgn0035696']
[]	[]	['FBgn0003178']
[]	[]	['FBgn0023170']
[5217]	[]	[]
[]	[]	['FBgn0083953']
[3752]	[]	[]
[9208]	[]	[]
[]	[14391]	[]
[]	[]	['FBgn0031653']
[]	[]	['FBgn0052647']
[]	[]	['FBgn0037533']
[]	[14420]	[]
[]	[]	['FBgn0038146']
[]	[]	['FBgn0037537']
[]	[]	['FBgn0030720']
[]	[]	['FBgn0052278']
[]	[14739]	[]
[]	[]	['FBgn0038948']
[]	[80280]	[]
[]	[227737]	[]
[]	[]	['FBgn0033584']
[]	[14748]	[]
[]	[]	['FBgn0010314']
[63908]	[]	[]
[]	[14758]	[]
[]	[]	['FBgn0042127']
[]	[276919]	[]
[]	[14789]	[]
[]	[]	['FBgn0052484']
[]	[14797]	[]
[]	[]	['FBgn0013813']
[]	[]	['FBgn0030558']
[]	[]	['FBgn0004914']
[1039]	[]	[]
[]	[]	['FBgn0036787']
[]	[]	['FBgn0260972']
[]	[]	['FBgn0038533']
[]	[]	['FBgn0038194']
[]	[14862]	[]
[]	[14866]	[]
[]	[]	['FBgn0031782']
[]	[]	['FBgn0035877']
[]	[]	['FBgn0040234']
[115024]	[]	[]
[]	[]	['FBgn0032213']
[]	[]	['FBgn0033297']
[]	[14738]	[]
[]	[]	['FBgn0035976']
[]	[]	['FBgn0040503']
[]	[]	['FBgn0030554']
[]	[]	['FBgn0029715']
[]	[14599]	[]
[]	[14600]	[]
[]	[]	['FBgn0031660']
[]	[14613]	[]
[]	[407831]	[]
[]	[211232]	[]
[]	[]	['FBgn0035147']
[]	[14629]	[]
[]	[]	['FBgn0051778']
[]	[227631]	[]
[]	[108937]	[]
[]	[]	['FBgn0010408']
[]	[]	['FBgn0030245']
[]	[]	['FBgn0019662']
[]	[227644]	[]
[]	[]	['FBgn0033705']
[]	[227648]	[]
[]	[]	['FBgn0033127']
[]	[212706]	[]
[]	[]	['FBgn0035619']
[]	[63828]	[]
[]	[227695]	[]
[]	[]	['FBgn0029706']
[]	[99237]	[]
[]	[]	['FBgn0034918']
[]	[]	['FBgn0027602']
[]	[]	['FBgn0039849']
[]	[14724]	[]
[]	[]	['FBgn0028968']
[]	[]	['FBgn0025140']
[]	[]	['FBgn0031240']
[]	[]	['FBgn0051874']
[79176]	[]	[]
[]	[226641]	[]
[]	[]	['FBgn0023542']
[]	[30050]	[]
[]	[]	['FBgn0040805']
[137392]	[]	[]
[]	[]	['FBgn0052372']
[]	[]	['FBgn0037747']
[]	[]	['FBgn0040877']
[]	[13711]	[]
[]	[15939]	[]
[]	[13716]	[]
[]	[]	['FBgn0027358']
[]	[]	['FBgn0029672']
[]	[]	['FBgn0086710']
[]	[13870]	[]
[]	[]	['FBgn0262732']
[]	[]	['FBgn0030716']
[]	[]	['FBgn0085442']
[]	[]	['FBgn0033885']
[]	[]	['FBgn0051199']
[]	[]	['FBgn0261545']
[]	[]	['FBgn0037515']
[]	[]	['FBgn0034401']
[]	[]	['FBgn0039874']
[57414]	[]	[]
[]	[13805]	[]
[]	[]	['FBgn0085268']
[]	[]	['FBgn0010611']
[]	[13857]	[]
[]	[]	['FBgn0037848']
[]	[]	['FBgn0020378']
[30001]	[]	[]
[]	[13616]	[]
[]	[]	['FBgn0031885']
[]	[]	['FBgn0031635']
[]	[]	['FBgn0058470']
[79016]	[]	[]
[]	[29871]	[]
[]	[106014]	[]
[]	[]	['FBgn0025615']
[]	[]	['FBgn0005674']
[]	[]	['FBgn0051780']
[]	[13516]	[]
[79057]	[]	[]
[]	[226517]	[]
[]	[]	['FBgn0062412']
[10447]	[]	[]
[]	[]	['FBgn0037726']
[]	[]	['FBgn0014427']
[]	[]	['FBgn0027094']
[]	[21372]	[]
[]	[]	['FBgn0038144']
[]	[]	['FBgn0052438']
[]	[13560]	[]
[]	[]	['FBgn0029814']
[]	[]	['FBgn0051220']
[]	[]	['FBgn0052441']
[]	[]	['FBgn0261285']
[]	[193813]	[]
[]	[]	['FBgn0030218']
[]	[13601]	[]
[]	[]	['FBgn0011272']
[]	[13859]	[]
[3015]	[]	[]
[]	[14238]	[]
[]	[14132]	[]
[]	[]	['FBgn0046296']
[]	[]	['FBgn0030029']
[]	[]	['FBgn0038964']
[]	[]	['FBgn0026252']
[]	[210673]	[]
[]	[]	['FBgn0038166']
[]	[]	['FBgn0036278']
[10539]	[]	[]
[]	[]	['FBgn0008635']
[440073]	[]	[]
[]	[]	['FBgn0029629']
[]	[]	['FBgn0261938']
[]	[381820]	[]
[]	[]	['FBgn0024332']
[]	[68121]	[]
[]	[]	['FBgn0038313']
[]	[]	['FBgn0037363']
[]	[]	['FBgn0027083']
[]	[194388]	[]
[]	[]	['FBgn0030949']
[]	[194401]	[]
[]	[]	['FBgn0040087']
[]	[]	['FBgn0032986']
[]	[]	['FBgn0004378']
[]	[]	['FBgn0010213']
[]	[]	['FBgn0032666']
[]	[]	['FBgn0039006']
[]	[]	['FBgn0033357']
[79762]	[]	[]
[10294]	[]	[]
[]	[]	['FBgn0034289']
[]	[]	['FBgn0034243']
[]	[]	['FBgn0036908']
[]	[231712]	[]
[]	[]	['FBgn0001220']
[]	[]	['FBgn0025454']
[]	[]	['FBgn0038595']
[]	[15368]	[]
[]	[]	['FBgn0000715']
[]	[]	['FBgn0002570']
[]	[]	['FBgn0032059']
[1620]	[]	[]
[]	[]	['FBgn0033358']
[]	[26895]	[]
[]	[]	['FBgn0001089']
[]	[]	['FBgn0033769']
[]	[]	['FBgn0000363']
[]	[]	['FBgn0003462']
[]	[]	['FBgn0032297']
[]	[]	['FBgn0035639']
[]	[]	['FBgn0052109']
[]	[]	['FBgn0041183']
[]	[23924]	[]
[]	[]	['FBgn0036183']
[]	[]	['FBgn0052521']
[]	[]	['FBgn0032507']
[]	[]	['FBgn0030870']
[]	[243371]	[]
[]	[]	['FBgn0036157']
[10525]	[]	[]
[]	[226999]	[]
[]	[]	['FBgn0017566']
[]	[]	['FBgn0028500']
[]	[]	['FBgn0000370']
[]	[]	['FBgn0027601']
[]	[50912]	[]
[]	[15896]	[]
[]	[]	['FBgn0032518']
[59353]	[]	[]
[]	[71901]	[]
[]	[]	['FBgn0033918']
[]	[277973]	[]
[]	[212439]	[]
[527]	[]	[]
[]	[]	['FBgn0001137']
[]	[654824]	[]
[]	[71997]	[]
[]	[]	['FBgn0041711']
[]	[]	['FBgn0050287']
[]	[228866]	[]
[]	[228880]	[]
[]	[15900]	[]
[2665]	[]	[]
[]	[]	['FBgn0004403']
[]	[81840]	[]
[]	[]	['FBgn0015541']
[]	[212531]	[]
[]	[15930]	[]
[]	[]	['FBgn0022288']
[]	[15937]	[]
[]	[56724]	[]
[54542]	[]	[]
[261729]	[]	[]
[]	[97895]	[]
[]	[15979]	[]
[]	[]	['FBgn0036257']
[]	[]	['FBgn0086706']
[]	[]	['FBgn0027296']
[]	[64930]	[]
[]	[]	['FBgn0035891']
[]	[]	['FBgn0038524']
[]	[100039953]	[]
[]	[]	['FBgn0031298']
[]	[]	['FBgn0003358']
[]	[]	['FBgn0036287']
[]	[]	['FBgn0050085']
[]	[]	['FBgn0002521']
[]	[]	['FBgn0031245']
[163126]	[]	[]
[]	[245049]	[]
[]	[]	['FBgn0027587']
[51805]	[]	[]
[]	[56188]	[]
[64837]	[]	[]
[]	[]	['FBgn0086693']
[]	[212307]	[]
[]	[]	['FBgn0034422']
[]	[]	['FBgn0002576']
[]	[]	['FBgn0064225']
[]	[]	['FBgn0020637']
[]	[]	['FBgn0027532']
[7070]	[]	[]
[]	[13543]	[]
[]	[]	['FBgn0002937']
[]	[]	['FBgn0033819']
[10815]	[]	[]
[]	[]	['FBgn0030776']
[]	[]	['FBgn0053129']
[56172]	[]	[]
[]	[621976]	[]
[]	[]	['FBgn0039748']
[]	[]	['FBgn0033327']
[]	[]	['FBgn0037592']
[]	[]	['FBgn0000448']
[]	[16211]	[]
[7091]	[]	[]
[]	[]	['FBgn0263032']
[]	[]	['FBgn0024248']
[30010]	[]	[]
[3163]	[]	[]
[54551]	[]	[]
[]	[]	['FBgn0038211']
[]	[]	['FBgn0037298']
[]	[98170]	[]
[]	[81898]	[]
[]	[114570]	[]
[]	[245666]	[]
[]	[]	['FBgn0050382']
[]	[114602]	[]
[]	[21781]	[]
[]	[57330]	[]
[]	[114606]	[]
[]	[]	['FBgn0031703']
[]	[81845]	[]
[]	[245688]	[]
[]	[16336]	[]
[]	[]	['FBgn0031182']
[131034]	[]	[]
[]	[78560]	[]
[]	[114654]	[]
[]	[73723]	[]
[]	[16362]	[]
[]	[16364]	[]
[]	[]	['FBgn0085391']
[]	[]	['FBgn0036974']
[]	[16205]	[]
[79158]	[]	[]
[]	[622404]	[]
[]	[]	['FBgn0033101']
[]	[229004]	[]
[]	[]	['FBgn0031399']
[81555]	[]	[]
[29978]	[]	[]
[79095]	[]	[]
[130733]	[]	[]
[]	[]	['FBgn0262955']
[55754]	[]	[]
[]	[229055]	[]
[56888]	[]	[]
[]	[]	['FBgn0025825']
[]	[97998]	[]
[]	[]	['FBgn0033699']
[]	[]	['FBgn0031491']
[]	[65256]	[]
[]	[]	['FBgn0037359']
[196394]	[]	[]
[]	[114642]	[]
[]	[]	['FBgn0030420']
[]	[]	['FBgn0032138']
[]	[16154]	[]
[]	[]	['FBgn0034069']
[]	[]	['FBgn0038038']
[]	[]	['FBgn0037999']
[]	[]	['FBgn0015521']
[]	[]	['FBgn0003862']
[]	[]	['FBgn0027091']
[]	[16185]	[]
[]	[]	['FBgn0038617']
[]	[]	['FBgn0033631']
[]	[]	['FBgn0011230']
[]	[15191]	[]
[]	[]	['FBgn0033289']
[]	[]	['FBgn0036745']
[]	[97064]	[]
[]	[]	['FBgn0030679']
[55061]	[]	[]
[]	[]	['FBgn0019938']
[]	[77975]	[]
[]	[]	['FBgn0004507']
[]	[]	['FBgn0033378']
[]	[]	['FBgn0013433']
[]	[]	['FBgn0035643']
[]	[]	['FBgn0036460']
[]	[]	['FBgn0050431']
[]	[80720]	[]
[]	[15193]	[]
[89927]	[]	[]
[]	[]	['FBgn0033373']
[]	[15199]	[]
[]	[15200]	[]
[]	[]	['FBgn0019929']
[]	[80743]	[]
[]	[80744]	[]
[]	[]	['FBgn0034270']
[79068]	[]	[]
[80758]	[]	[]
[]	[15227]	[]
[9079]	[]	[]
[]	[]	['FBgn0013672']
[]	[15260]	[]
[222553]	[]	[]
[]	[]	['FBgn0034138']
[]	[]	['FBgn0003475']
[]	[]	['FBgn0039101']
[]	[]	['FBgn0053126']
[117178]	[]	[]
[]	[211550]	[]
[64112]	[]	[]
[]	[14962]	[]
[]	[]	['FBgn0003275']
[]	[211586]	[]
[]	[]	['FBgn0033912']
[]	[]	['FBgn0029800']
[]	[64144]	[]
[]	[]	['FBgn0035073']
[]	[382062]	[]
[]	[14998]	[]
[]	[14999]	[]
[]	[15000]	[]
[9774]	[]	[]
[]	[]	['FBgn0026061']
[]	[]	['FBgn0028380']
[]	[15013]	[]
[]	[]	['FBgn0041180']
[]	[]	['FBgn0033100']
[]	[]	['FBgn0003300']
[]	[]	['FBgn0261792']
[]	[]	['FBgn0085405']
[]	[]	['FBgn0022268']
[]	[]	['FBgn0036101']
[]	[]	['FBgn0038271']
[]	[]	['FBgn0030478']
[]	[277250]	[]
[]	[]	['FBgn0036949']
[3382]	[]	[]
[]	[]	['FBgn0024314']
[]	[]	['FBgn0019925']
[]	[]	['FBgn0024365']
[]	[]	['FBgn0039920']
[]	[81006]	[]
[1741]	[]	[]
[]	[15478]	[]
[]	[13609]	[]
[]	[]	['FBgn0031489']
[]	[244864]	[]
[64641]	[]	[]
[]	[]	['FBgn0035241']
[]	[654470]	[]
[2583]	[]	[]
[]	[]	['FBgn0033274']
[]	[]	['FBgn0039530']
[]	[]	['FBgn0037370']
[]	[]	['FBgn0032915']
[]	[]	['FBgn0040395']
[]	[]	['FBgn0011016']
[]	[]	['FBgn0010309']
[]	[212153]	[]
[]	[212163]	[]
[]	[69259]	[]
[]	[212168]	[]
[]	[]	['FBgn0052512']
[]	[]	['FBgn0003279']
[]	[]	['FBgn0029755']
[]	[]	['FBgn0036742']
[]	[228576]	[]
[64743]	[]	[]
[]	[]	['FBgn0052743']
[4884]	[]	[]
[]	[80981]	[]
[]	[]	['FBgn0041713']
[65981]	[]	[]
[9377]	[]	[]
[51699]	[]	[]
[]	[]	['FBgn0038115']
[]	[]	['FBgn0031051']
[55611]	[]	[]
[]	[]	['FBgn0033294']
[]	[]	['FBgn0259817']
[]	[]	['FBgn0038498']
[]	[15312]	[]
[]	[]	['FBgn0050410']
[]	[]	['FBgn0032726']
[]	[326618]	[]
[]	[326622]	[]
[]	[211936]	[]
[]	[]	['FBgn0086451']
[]	[]	['FBgn0038953']
[]	[80880]	[]
[]	[]	['FBgn0261270']
[10752]	[]	[]
[]	[228355]	[]
[]	[80904]	[]
[]	[]	['FBgn0010339']
[]	[228368]	[]
[]	[]	['FBgn0031830']
[]	[]	['FBgn0261599']
[]	[]	['FBgn0004644']
[]	[]	['FBgn0035356']
[]	[]	['FBgn0039258']
[]	[]	['FBgn0032236']
[]	[]	['FBgn0030676']
[]	[193670]	[]
[]	[13445]	[]
[]	[13437]	[]
[]	[77125]	[]
[]	[109815]	[]
[]	[77048]	[]
[]	[]	['FBgn0041150']
[]	[11518]	[]
[]	[]	['FBgn0039417']
[]	[]	['FBgn0026309']
[]	[208158]	[]
[]	[77087]	[]
[157574]	[]	[]
[]	[]	['FBgn0038795']
[]	[]	['FBgn0052220']
[]	[11569]	[]
[]	[11576]	[]
[]	[]	['FBgn0040236']
[]	[109910]	[]
[]	[109979]	[]
[]	[11607]	[]
[]	[]	['FBgn0028481']
[]	[28000]	[]
[]	[]	['FBgn0038611']
[]	[28010]	[]
[53822]	[]	[]
[]	[]	['FBgn0052446']
[]	[224640]	[]
[125058]	[]	[]
[]	[]	['FBgn0029897']
[]	[72948]	[]
[]	[]	['FBgn0034885']
[]	[]	['FBgn0032538']
[]	[241035]	[]
[]	[240880]	[]
[]	[]	['FBgn0036886']
[truncated: 2,641 more rows]
