# Supplementary material for: Downregulation of glial genes involved in synaptic function mitigates Huntington's disease pathogenesis
Source: eLife. 2021 Apr 19;10:e64564. doi: 10.7554/eLife.64564 (PMC8149125; doi:10.7554/eLife.64564)
Supplement: Supplementary file 2. [file elife-64564-supp2.xlsx]

## Sheet: Sheet1
A) Whole Proteome Background
	mHTT Expressed in Neurons		mHTT Expressed in Glia
	Up	Down	Up	Down
Input Proteins	521	452	424	536
Edges	889	993	589	1410
PPI Enrichment	<2E-16	<2e-16	1.63e-12	<2E-16
B) Striatal Proteome Background
	mHTT Expressed in Neurons		mHTT Expressed in Glia
	Up	Down	Up	Down
Average Degree Enrcihment in Striatum	1.01e-06	9.68e-08	0.00117	3.37e-15
Average Betweenness Enrcihment in Striatum	3.44e-06	0.00363	0.00323	0.000511
Number of Clusters Enrichment in Striatum	3.09e-06	3.09e-06	0.0123	0.00431
