# Supplementary material for: Downregulation of glial genes involved in synaptic function mitigates Huntington's disease pathogenesis
Source: eLife. 2021 Apr 19;10:e64564. doi: 10.7554/eLife.64564 (PMC8149125; doi:10.7554/eLife.64564)
Supplement: Supplementary file 3. [file elife-64564-supp3.xlsx]

## Sheet: Glial mHTT Response Clusters
Network clustering for network of conserved HD DEGs in response to mHTT toxicity in glia
Upregulated					Downregulated
Cluster Number	Cluster Name	Human Genes	Specific		Cluster Number	Cluster Name	Human Genes	Specific
1	Transcription and Chromatin Remodeling	HDAC1, H2AFX, HIST1H2AC, RELA, XPO1, REST, BARD1, HDAC4, CHD1, GLI3, RBL2, TGIF1, TLR5, HMG20B, TAOK1	Yes		1	Synapse Assembly	GRM1, GRM5, NRXN1, EPB41, NRXN3, NRXN2 ,EPB41L1, DLGAP3, NLGN1, DLGAP1, EPB41L3, EPB41L2, NLGN4X, HOMER1, AGAP2, DLGAP2, DLGAP4, SYT7, LRRTM2, LRRTM1, SLITRK5, SYT13	Yes
2	Amio Acid Metabolism	PSAT1, CTBP2, PHGDH, PGAM2, DERA, KLF3, TUBB6	Yes		2	Calcium Ion Transport	PRKACB, PPP2R5D, CACNA1D, CACNA1C, CACNA2D2, CACNA1B, PPP2R5B, PPP2R5C, CACNA1H, CACNA1A, RYR2, CACNB2, CACNB3, CACNA1E, CACNB4, CABP1, CACNA2D1, CACNA2D3, SYT5, RAP1GAP2, KLHDC3	Yes
3	Cell Proliferation	HES1, RPA1, IGFBP3, USP1, IGFBP5, RECQL, HES6	Yes		3	Regulation of Immune System and Metabolism	HRAS, BAG4, FGF9, BCR, KSR2, PRKCH, ASAP2, DAB2IP	Yes
4	Cytokine Signaling/Innate Immunity	GBP2, STAT2, GBP1, IFIT2, MID1, TRIM22, TRIM2	Yes		4	Phagocytosis	ACTB, MYO5A, CALB1, CYFIP2, BAIAP2, CALN1, WIPF3	Yes
5	Arachidonic Acid Metabolism	CYP2J2,CYP2U1,CYP4F3,GPX1,PRDX1	Yes		5	mRNA processing	SESN3, SRSF3, PRKAA2, HNRNPA0, CELF1, CELF2	Yes
6	Steroid Synthesis	AHSA2,PPIG, CYP1B1, NKTR, HSD17B7	Yes		6	Fatty Acid Degradation	MYH10, KLF5, CPT1C, ACSL6	Yes
7	Receptor Mediated Cell Signaling	FYN, YES1, LYN, ACACB, STAT3, SOS1, IGF1R, IL6ST, ANGPT1, INSR, RRAS, FGFR3, FGFR2, CSF1R, ATP6V0E1, TIE1, ALDH1A1, LIFR, OSMR, MTHFD2, ALDH1L1, MRAS, HSD17B11, BDH2, HSDL2	No		7	Synaptic Transmssion/Cell Signaling	ADCY1, GNB1, GNAO1, PRKCD, GNB5, ADCY3, ADCY5, ADCY9, GNG3, GNG4, GNG7, PRKCG, PRKCE, DRD1, GRM3, ADRB1, DRD2, AKT3, PDE2A, PDE1B, PDE10A, PDPK1, CAMK4, GABBR2, HTR2C, PDE4B, KCNJ9, ENTPD6, ADRA2C, NPY1R, NPY5R, OPRK1, HRH3, ADORA2A, GPR27, GCH1, POLR3K,PDE7B, RGS2, RGS4, RGS20, RGS14, ETNK1	No
8	Endocytosis	SNAP23, TF, CTTN, ITSN1, VAMP8, VAMP3, HIP1R, ANXA3, GNS, LRP2, STXBP3, VAMP5,RHOBTB3, ITSN2, SNX9, SNX18	No		8	GTPase Signal Transduction	CDC42, RHOBTB2, CDK5, PAK1, EPHB1, KALRN, PAK3, TIAM1, PLXNA2, ARHGEF17, EPHA4, NGEF, SLIT2, PAK6, PAK5, CHN1, DCC, MAPK6, PLXNA4, ROBO2, ARHGAP32, DLC1, ARHGEF4, ABLIM2, ARHGAP33, DOCK3, SDCBP, DOCK4, TNK2, SEMA6B, RASD2	No
9	G-Protein Coupled Receptor Signaling	ANXA1, FZD5, AGT, CXCR4, GNAI3, GNG11, GNG12, GNB4, LRP6, FZD6, SFRP2, ADCYAP1R1, GPR17, RGS1, ACKR3	No		9	Synaptic Transmission/Calcium Transport	ACTN2, GRIN2B, CAMK2B, CAMK2A, GRIN2A, ACTN1, GRIN1, GRIA2, AKAP5, GRIA1, GRIA3, TSPAN7, SIPA1L1, TMOD1, PDLIM7, TMOD2	No
10	mRNA Processing	SRSF11, HNRNPA1, HNRNPM, HNRNPA3, DDX17, ELAVL1, HNRNPA2B1, HNRNPH3, TIAL1, ZNF207, RALY, NSUN2, RBM38, SREK1	No		10	Phospholipid Metabolism	PLPPR3, LPCAT4, VLDLR, DGAT2, LPL, GPD1L, DGKZ, DGKE, DGKI, GPAT2, SELENOI, PLPPR4, PLPPR2, ACO2, LPGAT1	No
11	Wound Healing and Inflammation	TIMP1, TGFB1, VWF, TGFB2, SPARC, SERPING1, CD63, INHBB, LTBP1, SERPINA5, SERPINA1, KLF10, TIMP3, PAPLN	No		11	Protein Ubiquitination	LMO7, KLHL13, RNF6, UBE2B, FBXW11, PJA2, WWP1, KLHL2, NEDD4L, RNF130, PJA1, LNX1, HIVEP2, RPA3, ATP8A2	No
12	Extracellular Matrix Organization and Signaling	LAMA2, FLNA, CFL2, TNC, BCAN, ITGA6, ITGA2, ITGA7, LAMA1, POMT2, SSH2, B3GAT2	No		12	MAPK1 Signaling	MAPK1, RXRG, ATP1A1, ATP1A3, PTPN7, PTPRR, PTPN5, DAPK1, DUSP6, DUSP8, THRB, MATK, RARB	No
13	Inflammation/Regulation of Transcription	NR3C1, NFE2L2, JUN, CREB1, ETS1, DUSP1, ATF7, SQSTM1, ATF3, KLF6, FKBP5, GTF3A, PRKG1	No		13	Nervous System Development	CALM1, MAP2K4, FLT4, FGF12, FGF13, FGF14, ATP2B1 ATP2B2, RYR3, GAP43, NRGN, CAMK1, CAMK1D, CAMK1G, PNCK	No
14	Lipid Transport and Storage	PEX11A, ABCA1, RXRA, PPARA, FAT1, CD36, NR2F1, NIPSNAP3A, ANGPTL4, PEX5L, SLC27A1	No		14	Neurotransmitter Transport	SYT1, RIMS1, UNC13A, GAD1, DNAJC5, LIN7B, GAD2, GLUL, PPFIA4, BSN, ELOVL4, SYT4, RIMS2, STX1B	No
15	GTPase Signaling/Actin Cytoskeleton	ARHGDIB, MYL6, RHOC, DAAM1, RHOBTB1, RHOU, SEMA4D, NET1, DAAM2, MYLK3, FMNL2	No		15	Synaptic Reuptake	AP2M1, ARRB1, ACTR2, ITSN1, SH3GL2, DNAJC6, FNBP1L, SYT2, RPS6KA3, RPS6KA6, PACSIN1, AP3B2, INF2	No
16	Cell Signaling	ENAH, NTRK2, CTNNB1, ABL1, IQGAP1, JUP, BNIP2, NUMA1, UCKL1	No		16	Axon Guidance and Development	SCN1A, SPTBN2, KCNQ5, SPTB, KCNQ3, KCNQ2, KCNJ4, ANK2, ANK3, SCN2A, SCN3A, SCN8A	No
17	Fatty Acid Metabolism	ACSL1, ACAA1, ACSBG1, ABCD3, ACADVL, FADS2, ECHDC2	No		17	GABAergic Synapse	ARHGEF9, GABRG2, GABRB2, GABRB3, GLRB, NPTN, GABRA2, GABRA1, GABRA5, GABRA4, GABRD	No
18	Cell-Cell Adhesion	F11R, TJP1, MAP3K20, JAM2, HCLS1, MPDZ	No		18	Potassium Transport	KCNAB2, KCNB1, KCNA1, KCNA4, CNTNAP1, KCNH2, KCNA2, KCNF1, KCNS2, KCNV1	No
19	Endoplasmic Reticulum Stress	DNAJB1, HSPA2, ST13, DNAJB2, DNAJC3	No		19	Regulation of Potassium	NOS1, KCNIP2, KCNC1, NCS1, KCNIP1, KCNIP4, HPCA, VSNL1, GUCA1A, HPCAL4	No
20	NF-Kappa B Signaling	TRAF3, MAP4K4, CFLAR, MAP3K2	No		20	Cytokine Signaling and Protein Transport	RANBP2, HSPA13, HSPA12A, EIF4E, MKKS, DNAJB14, EIF4E3	No
					21	G2/M Cell Cycle Transition	DCTN3, TUBA4A, ACTR1A, PCNT,MARK4, ACTR10,RAB6B	No

## Sheet: Glial mHTT Response Annotations
Upregulated													Downregulated
1-Transcription and Chromatin Remodeling													1-Synapse Assembly
GO Biological Process													GO Biological Process
pathway ID	pathway description	observed gene count	false discovery rate	matching proteins in your network (IDs)	matching proteins in your network (labels)								pathway ID	pathway description	observed gene count	false discovery rate	matching proteins in your network (IDs)	matching proteins in your network (labels)
GO.0070933	histone H4 deacetylation	3	0.000526	ENSP00000264606,ENSP00000311816,ENSP00000362649	HDAC1,HDAC4,REST								GO.0007268	synaptic transmission	13	1.14e-11	ENSP00000020926,ENSP00000263846,ENSP00000265459,ENSP00000282753,ENSP00000306138,ENSP00000316377,ENSP00000334382,ENSP00000337168,ENSP00000338349,ENSP00000354541,ENSP00000366283,ENSP00000385142,ENSP00000400258	DLGAP1,DLGAP2,EPB41L1,GRM1,GRM5,HOMER1,NLGN1,NRXN1,NRXN2,NRXN3,SLITRK5,SYT13,SYT7
GO.0006325	chromatin organization	7	0.00063	ENSP00000262133,ENSP00000264606,ENSP00000284049,ENSP00000311816,ENSP00000328269,ENSP00000362649,ENSP00000364310	CHD1,H2AFX,HDAC1,HDAC4,HMG20B,RBL2,REST								GO.0007158	neuron cell-cell adhesion	5	1.87e-08	ENSP00000265459,ENSP00000275857,ENSP00000338349,ENSP00000354541,ENSP00000385142	NLGN1,NLGN4X,NRXN1,NRXN2,NRXN3
GO.0000122	negative regulation of transcription from RNA polymerase II promoter	7	0.000703	ENSP00000264606,ENSP00000311816,ENSP00000327959,ENSP00000362649,ENSP00000379258,ENSP00000384273,ENSP00000384863	GLI3,HDAC1,HDAC4,RELA,REST,TGIF1,XPO1								GO.0035418	protein localization to synapse	5	1.87e-08	ENSP00000265459,ENSP00000295057,ENSP00000334382,ENSP00000354541,ENSP00000385142	HOMER1,LRRTM1,NLGN1,NRXN1,NRXN2
GO.0051171	regulation of nitrogen compound metabolic process	12	0.000703	ENSP00000260947,ENSP00000262133,ENSP00000264606,ENSP00000284049,ENSP00000327959,ENSP00000328269,ENSP00000340089,ENSP00000362649,ENSP00000364310,ENSP00000379258,ENSP00000384273,ENSP00000384863	BARD1,CHD1,GLI3,H2AFX,HDAC1,HDAC4,HMG20B,RBL2,RELA,TGIF1,TLR5,XPO1								GO.0051965	positive regulation of synapse assembly	6	8.8e-08	ENSP00000274711,ENSP00000295057,ENSP00000338349,ENSP00000354541,ENSP00000366283,ENSP00000385142	LRRTM1,LRRTM2,NLGN1,NRXN1,NRXN3,SLITRK5
GO.0051253	negative regulation of RNA metabolic process	8	0.000703	ENSP00000260947,ENSP00000264606,ENSP00000311816,ENSP00000327959,ENSP00000362649,ENSP00000379258,ENSP00000384273,ENSP00000384863	BARD1,GLI3,HDAC1,HDAC4,RELA,REST,TGIF1,XPO1								GO.0030865	cortical cytoskeleton organization	5	1.17e-07	ENSP00000337168,ENSP00000338481,ENSP00000341138,ENSP00000345259,ENSP00000354541	EPB41,EPB41L1,EPB41L2,EPB41L3,NLGN1
KEGG													KEGG
pathway ID	pathway description	observed gene count	false discovery rate	matching proteins in your network (IDs)	matching proteins in your network (labels)								pathway ID	pathway description	observed gene count	false discovery rate	matching proteins in your network (IDs)	matching proteins in your network (labels)
5034	Alcoholism	4	0.000712	ENSP00000264606,ENSP00000321389,ENSP00000362649,ENSP00000364310	H2AFX,HDAC1,HDAC4,HIST1H2AC								4530	Tight junction	4	0.00273	ENSP00000337168,ENSP00000338481,ENSP00000341138,ENSP00000345259	EPB41,EPB41L1,EPB41L2,EPB41L3
5169	Epstein-Barr virus infection	4	0.000851	ENSP00000264606,ENSP00000362649,ENSP00000384273,ENSP00000384863	HDAC1,HDAC4,RELA,XPO1								4724	Glutamatergic synapse	3	0.0302	ENSP00000282753,ENSP00000306138,ENSP00000316377	DLGAP1,GRM1,GRM5
5203	Viral carcinogenesis	4	0.000851	ENSP00000262133,ENSP00000264606,ENSP00000362649,ENSP00000384273	HDAC1,HDAC4,RBL2,RELA								4514	Cell adhesion molecules (CAMs)	3	0.0386	ENSP00000265459,ENSP00000354541,ENSP00000385142	NLGN1,NRXN1,NRXN2
5134	Legionellosis	2	0.0486	ENSP00000340089,ENSP00000384273	RELA,TLR5
													2- Calcium Ion Transport
2-Amino Acid Metabolism													GO Biological Process
GO Biological Process													pathway ID	pathway description	observed gene count	false discovery rate	matching proteins in your network (IDs)	matching proteins in your network (labels)
pathway ID	pathway description	observed gene count	false discovery rate	matching proteins in your network (IDs)	matching proteins in your network (labels)								GO.0006816	calcium ion transport	11	1.16e-13	ENSP00000266376,ENSP00000288139,ENSP00000301050,ENSP00000320025,ENSP00000334198,ENSP00000349320,ENSP00000353362,ENSP00000355533,ENSP00000356545,ENSP00000360406,ENSP00000419101	CACNA1A,CACNA1B,CACNA1C,CACNA1D,CACNA1E,CACNA1H,CACNA2D1,CACNA2D3,CACNB2,CACNB3,RYR2
GO.0006564	L-serine biosynthetic process	2	0.0083	ENSP00000358417,ENSP00000365773	PHGDH,PSAT1								GO.0051924	regulation of calcium ion transport	11	1.16e-13	ENSP00000266376,ENSP00000288139,ENSP00000301050,ENSP00000317310,ENSP00000320025,ENSP00000349320,ENSP00000355533,ENSP00000360406,ENSP00000418081,ENSP00000419101,ENSP00000438949	CABP1,CACNA1B,CACNA1C,CACNA1D,CACNA2D1,CACNA2D2,CACNA2D3,CACNB2,CACNB3,CACNB4,RYR2
													GO.0070588	calcium ion transmembrane transport	10	1.16e-13	ENSP00000288139,ENSP00000301050,ENSP00000320025,ENSP00000334198,ENSP00000349320,ENSP00000353362,ENSP00000355533,ENSP00000356545,ENSP00000360406,ENSP00000419101	CACNA1A,CACNA1B,CACNA1D,CACNA1E,CACNA1H,CACNA2D1,CACNA2D3,CACNB2,CACNB3,RYR2
KEGG													GO.0034765	regulation of ion transmembrane transport	12	5.26e-13	ENSP00000288139,ENSP00000301050,ENSP00000317310,ENSP00000320025,ENSP00000334198,ENSP00000349320,ENSP00000353362,ENSP00000355533,ENSP00000356545,ENSP00000360406,ENSP00000418081,ENSP00000419101	CABP1,CACNA1A,CACNA1B,CACNA1D,CACNA1E,CACNA1H,CACNA2D1,CACNA2D2,CACNA2D3,CACNB2,CACNB3,RYR2
pathway ID	pathway description	observed gene count	false discovery rate	matching proteins in your network (IDs)	matching proteins in your network (labels)								GO.0051899	membrane depolarization	8	8.6e-13	ENSP00000266376,ENSP00000288139,ENSP00000301050,ENSP00000334198,ENSP00000353362,ENSP00000356545,ENSP00000360406,ENSP00000438949	CACNA1A,CACNA1B,CACNA1C,CACNA1D,CACNA1E,CACNA1H,CACNB3,CACNB4
260	Glycine, serine and threonine metabolism	3	6.4e-05	ENSP00000297283,ENSP00000358417,ENSP00000365773	PGAM2,PHGDH,PSAT1
1230	Biosynthesis of amino acids	3	0.000191	ENSP00000297283,ENSP00000358417,ENSP00000365773	PGAM2,PHGDH,PSAT1
1200	Carbon metabolism	3	0.000397	ENSP00000297283,ENSP00000358417,ENSP00000365773	PGAM2,PHGDH,PSAT1								KEGG
													pathway ID	pathway description	observed gene count	false discovery rate	matching proteins in your network (IDs)	matching proteins in your network (labels)
3-Cell Proliferation													4261	Adrenergic signaling in cardiomyocytes	13	2.51e-21	ENSP00000164133,ENSP00000266376,ENSP00000288139,ENSP00000301050,ENSP00000320025,ENSP00000349320,ENSP00000355533,ENSP00000359719,ENSP00000412324,ENSP00000417963,ENSP00000418081,ENSP00000419101,ENSP00000438949	CACNA1C,CACNA1D,CACNA2D1,CACNA2D2,CACNA2D3,CACNB2,CACNB3,CACNB4,PPP2R5B,PPP2R5C,PPP2R5D,PRKACB,RYR2
GO Biological Process													4010	MAPK signaling pathway	13	2.8e-18	ENSP00000266376,ENSP00000288139,ENSP00000301050,ENSP00000320025,ENSP00000334198,ENSP00000349320,ENSP00000353362,ENSP00000356545,ENSP00000359719,ENSP00000360406,ENSP00000418081,ENSP00000419101,ENSP00000438949	CACNA1A,CACNA1B,CACNA1C,CACNA1D,CACNA1E,CACNA1H,CACNA2D1,CACNA2D2,CACNA2D3,CACNB2,CACNB3,CACNB4,PRKACB
pathway ID	pathway description	observed gene count	false discovery rate	matching proteins in your network (IDs)	matching proteins in your network (labels)								5414	Dilated cardiomyopathy	10	4.15e-17	ENSP00000266376,ENSP00000288139,ENSP00000301050,ENSP00000320025,ENSP00000349320,ENSP00000355533,ENSP00000359719,ENSP00000418081,ENSP00000419101,ENSP00000438949	CACNA1C,CACNA1D,CACNA2D1,CACNA2D2,CACNA2D3,CACNB2,CACNB3,CACNB4,PRKACB,RYR2
GO.0044342	type B pancreatic cell proliferation	2	0.029	ENSP00000233813,ENSP00000370473	IGFBP3,IGFBP5								5412	Arrhythmogenic right ventricular cardiomyopathy (ARVC)	9	1.15e-15	ENSP00000266376,ENSP00000288139,ENSP00000301050,ENSP00000320025,ENSP00000349320,ENSP00000355533,ENSP00000418081,ENSP00000419101,ENSP00000438949	CACNA1C,CACNA1D,CACNA2D1,CACNA2D2,CACNA2D3,CACNB2,CACNB3,CACNB4,RYR2
GO.0014912	negative regulation of smooth muscle cell migration	2	0.0359	ENSP00000233813,ENSP00000370473	IGFBP3,IGFBP5								4260	Cardiac muscle contraction	9	1.19e-15	ENSP00000266376,ENSP00000288139,ENSP00000301050,ENSP00000320025,ENSP00000349320,ENSP00000355533,ENSP00000418081,ENSP00000419101,ENSP00000438949	CACNA1C,CACNA1D,CACNA2D1,CACNA2D2,CACNA2D3,CACNB2,CACNB3,CACNB4,RYR2
GO.0043568	positive regulation of insulin-like growth factor receptor signaling pathway	2	0.0359	ENSP00000233813,ENSP00000370473	IGFBP3,IGFBP5
													3-Regulation of Immune System and Metabolism
													GO Biological Process
KEGG													pathway ID	pathway description	observed gene count	false discovery rate	matching proteins in your network (IDs)	matching proteins in your network (labels)
pathway ID	pathway description	observed gene count	false discovery rate	matching proteins in your network (IDs)	matching proteins in your network (labels)								GO.0009893	positive regulation of metabolic process	8	0.00421	ENSP00000220429,ENSP00000259371,ENSP00000281419,ENSP00000287322,ENSP00000303507,ENSP00000309845,ENSP00000329127,ENSP00000371790	ASAP2,BAG4,BCR,DAB2IP,FGF9,GABPB1,HRAS,PRKCH
3460	Fanconi anemia pathway	3	0.000146	ENSP00000232424,ENSP00000254719,ENSP00000343526	HES1,RPA1,USP1								GO.0002682	regulation of immune system process	5	0.0361	ENSP00000259371,ENSP00000303507,ENSP00000309845,ENSP00000329127,ENSP00000371790	BCR,DAB2IP,FGF9,HRAS,PRKCH
													GO.0007169	transmembrane receptor protein tyrosine kinase signaling pathway	4	0.0361	ENSP00000259371,ENSP00000303507,ENSP00000309845,ENSP00000371790	BCR,DAB2IP,FGF9,HRAS
4-Cytokine Singaling/Innate Immunity													GO.0009966	regulation of signal transduction	6	0.0361	ENSP00000259371,ENSP00000287322,ENSP00000303507,ENSP00000309845,ENSP00000329127,ENSP00000371790	BAG4,BCR,DAB2IP,FGF9,HRAS,PRKCH
GO Biological Process													GO.0009967	positive regulation of signal transduction	5	0.0361	ENSP00000259371,ENSP00000287322,ENSP00000309845,ENSP00000329127,ENSP00000371790	BAG4,DAB2IP,FGF9,HRAS,PRKCH
pathway ID	pathway description	observed gene count	false discovery rate	matching proteins in your network (IDs)	matching proteins in your network (labels)
GO.0019221	cytokine-mediated signaling pathway	6	2.76e-06	ENSP00000312678,ENSP00000315768,ENSP00000359497,ENSP00000359504,ENSP00000360891,ENSP00000369299	GBP1,GBP2,IFIT2,MID1,STAT2,TRIM22								KEGG
GO.0060333	interferon-gamma-mediated signaling pathway	4	1.96e-05	ENSP00000312678,ENSP00000359497,ENSP00000359504,ENSP00000369299	GBP1,GBP2,MID1,TRIM22								pathway ID	pathway description	observed gene count	false discovery rate	matching proteins in your network (IDs)	matching proteins in your network (labels)
GO.0071346	cellular response to interferon-gamma	4	5.09e-05	ENSP00000312678,ENSP00000359497,ENSP00000359504,ENSP00000369299	GBP1,GBP2,MID1,TRIM22								5200	Pathways in cancer	3	0.0296	ENSP00000303507,ENSP00000309845,ENSP00000371790	BCR,FGF9,HRAS
GO.0045087	innate immune response	6	0.000104	ENSP00000312678,ENSP00000315768,ENSP00000359497,ENSP00000359504,ENSP00000360891,ENSP00000369299	GBP1,GBP2,IFIT2,MID1,STAT2,TRIM22								5218	Melanoma	2	0.0296	ENSP00000309845,ENSP00000371790	FGF9,HRAS
GO.0051607	defense response to virus	4	0.000226	ENSP00000315768,ENSP00000359504,ENSP00000360891,ENSP00000369299	GBP1,IFIT2,STAT2,TRIM22								5220	Chronic myeloid leukemia	2	0.0296	ENSP00000303507,ENSP00000309845	BCR,HRAS
5-Arachidonic Acid Metabolism													4-Phagocytosis
GO Biological Process													GO Biological Process
pathway ID	pathway description	observed gene count	false discovery rate	matching proteins in your network (IDs)	matching proteins in your network (labels)								pathway ID	pathway description	observed gene count	false discovery rate	matching proteins in your network (IDs)	matching proteins in your network (labels)
GO.0019369	arachidonic acid metabolic process	4	4.6e-06	ENSP00000221307,ENSP00000333212,ENSP00000360247,ENSP00000407375	CYP2J2,CYP2U1,CYP4F3,GPX1								GO.0038096	Fc-gamma receptor signaling pathway involved in phagocytosis	4	1.99e-05	ENSP00000316338,ENSP00000325817,ENSP00000349960,ENSP00000386878	ACTB,BAIAP2,CYFIP2,WIPF3
GO.0009410	response to xenobiotic stimulus	4	5.91e-05	ENSP00000221307,ENSP00000333212,ENSP00000360247,ENSP00000407375	CYP2J2,CYP2U1,CYP4F3,GPX1								GO.0006909	phagocytosis	4	0.000333	ENSP00000316338,ENSP00000325817,ENSP00000349960,ENSP00000386878	ACTB,BAIAP2,CYFIP2,WIPF3
GO.0055114	oxidation-reduction process	5	0.000309	ENSP00000221307,ENSP00000262746,ENSP00000333212,ENSP00000360247,ENSP00000407375	CYP2J2,CYP2U1,CYP4F3,GPX1,PRDX1								GO.0048010	vascular endothelial growth factor receptor signaling pathway	3	0.00583	ENSP00000316338,ENSP00000325817,ENSP00000349960	ACTB,BAIAP2,CYFIP2
GO.0044248	cellular catabolic process	5	0.00151	ENSP00000221307,ENSP00000262746,ENSP00000333212,ENSP00000360247,ENSP00000407375	CYP2J2,CYP2U1,CYP4F3,GPX1,PRDX1								GO.0007264	small GTPase mediated signal transduction	4	0.0239	ENSP00000316338,ENSP00000325817,ENSP00000349960,ENSP00000386878	ACTB,BAIAP2,CYFIP2,WIPF3
GO.0006805	xenobiotic metabolic process	3	0.0058	ENSP00000221307,ENSP00000333212,ENSP00000360247	CYP2J2,CYP2U1,CYP4F3
													KEGG
KEGG													pathway ID	pathway description	observed gene count	false discovery rate	matching proteins in your network (IDs)	matching proteins in your network (labels)
pathway ID	pathway description	observed gene count	false discovery rate	matching proteins in your network (IDs)	matching proteins in your network (labels)								4810	Regulation of actin cytoskeleton	3	0.0101	ENSP00000316338,ENSP00000325817,ENSP00000349960	ACTB,BAIAP2,CYFIP2
590	Arachidonic acid metabolism	4	1.02e-07	ENSP00000221307,ENSP00000333212,ENSP00000360247,ENSP00000407375	CYP2J2,CYP2U1,CYP4F3,GPX1								4520	Adherens junction	2	0.0344	ENSP00000316338,ENSP00000349960	ACTB,BAIAP2
6-Steroid Synthesis													5-mRNA Processing
KEGG													GO Biological Process
#pathway ID	pathway description	observed gene count	false discovery rate	matching proteins in your network (IDs)	matching proteins in your network (labels)								pathway ID	pathway description	observed gene count	false discovery rate	matching proteins in your network (IDs)	matching proteins in your network (labels)
140	Steroid hormone biosynthesis	2	0.0094	ENSP00000254521,ENSP00000260630	CYP1B1,HSD17B7								GO.0006397	mRNA processing	4	0.0311	ENSP00000316042,ENSP00000362820,ENSP00000389951,ENSP00000435926	CELF1,CELF2,HNRNPA0,SRSF3
4913	Ovarian steroidogenesis	2	0.0094	ENSP00000254521,ENSP00000260630	CYP1B1,HSD17B7								GO.0070935	3 -UTR-mediated mRNA stabilization	2	0.0311	ENSP00000316042,ENSP00000385269	ELAVL1,HNRNPA0
7- Receptor Mediated Cell Signaling													6-Fatty Acid Degradation
GO Biological Process													KEGG
pathway ID	pathway description	observed gene count	false discovery rate	matching proteins in your network (IDs)	matching proteins in your network (labels)								pathway ID	pathway description	observed gene count	false discovery rate	matching proteins in your network (IDs)	matching proteins in your network (labels)
GO.0018108	peptidyl-tyrosine phosphorylation	9	7.34e-10	ENSP00000268035,ENSP00000286301,ENSP00000303830,ENSP00000324740,ENSP00000339824,ENSP00000346671,ENSP00000361554,ENSP00000410294,ENSP00000428924	CSF1R,FGFR2,FGFR3,FYN,IGF1R,INSR,LYN,TIE1,YES1								71	Fatty acid degradation	2	0.00463	ENSP00000296869,ENSP00000319343	ACSL6,CPT1C
GO.0071375	cellular response to peptide hormone stimulus	10	4.74e-09	ENSP00000264657,ENSP00000268035,ENSP00000303830,ENSP00000324740,ENSP00000339824,ENSP00000346671,ENSP00000384675,ENSP00000410294,ENSP00000427941,ENSP00000428924	ATP6V0E1,FGFR2,FGFR3,FYN,IGF1R,INSR,LYN,SOS1,STAT3,YES1								1212	Fatty acid metabolism	2	0.00463	ENSP00000296869,ENSP00000319343	ACSL6,CPT1C
GO.0007167	enzyme linked receptor protein signaling pathway	13	9.77e-09	ENSP00000263409,ENSP00000264657,ENSP00000268035,ENSP00000286301,ENSP00000303830,ENSP00000324740,ENSP00000338799,ENSP00000346671,ENSP00000384675,ENSP00000410294,ENSP00000427941,ENSP00000428340,ENSP00000428924	ANGPT1,ATP6V0E1,CSF1R,FGFR2,FYN,IGF1R,IL6ST,INSR,LIFR,LYN,SOS1,STAT3,YES1								3320	PPAR signaling pathway	2	0.00467	ENSP00000296869,ENSP00000319343	ACSL6,CPT1C
GO.0007169	transmembrane receptor protein tyrosine kinase signaling pathway	11	1.77e-07	ENSP00000264657,ENSP00000268035,ENSP00000286301,ENSP00000303830,ENSP00000324740,ENSP00000346671,ENSP00000384675,ENSP00000410294,ENSP00000427941,ENSP00000428340,ENSP00000428924	ANGPT1,ATP6V0E1,CSF1R,FGFR2,FYN,IGF1R,INSR,LYN,SOS1,STAT3,YES1								4920	Adipocytokine signaling pathway	2	0.00467	ENSP00000296869,ENSP00000319343	ACSL6,CPT1C
KEGG													7-Synaptic Transmission/Cell Signaling
pathway ID	pathway description	observed gene count	false discovery rate	matching proteins in your network (IDs)	matching proteins in your network (labels)								GO Biological Process
4014	Ras signaling pathway	9	7.92e-10	ENSP00000246792,ENSP00000268035,ENSP00000286301,ENSP00000289104,ENSP00000303830,ENSP00000339824,ENSP00000384675,ENSP00000410294,ENSP00000428340	ANGPT1,CSF1R,FGFR2,FGFR3,IGF1R,INSR,MRAS,RRAS,SOS1								pathway ID	pathway description	observed gene count	false discovery rate	matching proteins in your network (IDs)	matching proteins in your network (labels)
4015	Rap1 signaling pathway	8	1.14e-08	ENSP00000246792,ENSP00000268035,ENSP00000286301,ENSP00000289104,ENSP00000303830,ENSP00000339824,ENSP00000410294,ENSP00000428340	ANGPT1,CSF1R,FGFR2,FGFR3,IGF1R,INSR,MRAS,RRAS								GO.0007187	G-protein coupled receptor signaling pathway, coupled to cyclic nucleotide second messenger	14	1.08e-15	ENSP00000260600,ENSP00000262493,ENSP00000265572,ENSP00000294016,ENSP00000297323,ENSP00000327652,ENSP00000336630,ENSP00000342560,ENSP00000354652,ENSP00000354859,ENSP00000355316,ENSP00000358301,ENSP00000367869,ENSP00000386069	ADCY1,ADCY3,ADCY9,ADORA2A,ADRA2C,ADRB1,DRD1,DRD2,GNAO1,GNB1,GRM3,HRH3,NPY1R,OPRK1
4151	PI3K-Akt signaling pathway	8	3.95e-07	ENSP00000268035,ENSP00000274276,ENSP00000286301,ENSP00000303830,ENSP00000339824,ENSP00000384675,ENSP00000410294,ENSP00000428340	ANGPT1,CSF1R,FGFR2,FGFR3,IGF1R,INSR,OSMR,SOS1								GO.0007267	cell-cell signaling	22	1.08e-15	ENSP00000259455,ENSP00000260600,ENSP00000263431,ENSP00000265572,ENSP00000276198,ENSP00000294016,ENSP00000294117,ENSP00000297323,ENSP00000310661,ENSP00000327652,ENSP00000336630,ENSP00000342560,ENSP00000344220,ENSP00000354859,ENSP00000355316,ENSP00000355556,ENSP00000357067,ENSP00000358301,ENSP00000367869,ENSP00000371594,ENSP00000386069,ENSP00000419361	ADCY1,ADCY3,ADCY5,ADCY9,ADORA2A,ADRA2C,ADRB1,DRD1,DRD2,GABBR2,GNB1,GNG3,GNG4,GNG7,GRM3,HRH3,HTR2C,KCNJ9,OPRK1,PDE7B,PDPK1,PRKCG
4630	Jak-STAT signaling pathway	5	7.65e-05	ENSP00000263409,ENSP00000264657,ENSP00000274276,ENSP00000338799,ENSP00000384675	IL6ST,LIFR,OSMR,SOS1,STAT3								GO.0007268	synaptic transmission	19	1.08e-15	ENSP00000259455,ENSP00000260600,ENSP00000263431,ENSP00000265572,ENSP00000276198,ENSP00000294016,ENSP00000294117,ENSP00000297323,ENSP00000310661,ENSP00000327652,ENSP00000342560,ENSP00000344220,ENSP00000354859,ENSP00000355316,ENSP00000355556,ENSP00000357067,ENSP00000367869,ENSP00000371594,ENSP00000419361	ADCY1,ADCY3,ADCY5,ADCY9,DRD1,DRD2,GABBR2,GNB1,GNG3,GNG4,GNG7,GRM3,HRH3,HTR2C,KCNJ9,OPRK1,PDE7B,PDPK1,PRKCG
4520	Adherens junction	4	8.64e-05	ENSP00000268035,ENSP00000303830,ENSP00000324740,ENSP00000346671	FYN,IGF1R,INSR,YES1								GO.0007188	adenylate cyclase-modulating G-protein coupled receptor signaling pathway	13	5.23e-15	ENSP00000260600,ENSP00000262493,ENSP00000265572,ENSP00000294016,ENSP00000297323,ENSP00000327652,ENSP00000336630,ENSP00000354652,ENSP00000354859,ENSP00000355316,ENSP00000358301,ENSP00000367869,ENSP00000386069	ADCY1,ADCY3,ADCY9,ADORA2A,ADRA2C,ADRB1,DRD1,DRD2,GNAO1,GNB1,GRM3,NPY1R,OPRK1
													GO.0046058	cAMP metabolic process	9	3.35e-14	ENSP00000243052,ENSP00000294016,ENSP00000297323,ENSP00000310661,ENSP00000332116,ENSP00000334910,ENSP00000336630,ENSP00000419361,ENSP00000438284	ADCY1,ADCY5,ADCY9,ADORA2A,PDE10A,PDE1B,PDE2A,PDE4B,PDE7B
8-Endocytosis
GO Biological Process													KEGG
pathway ID	pathway description	observed gene count	false discovery rate	matching proteins in your network (IDs)	matching proteins in your network (labels)								pathway ID	pathway description	observed gene count	false discovery rate	matching proteins in your network (IDs)	matching proteins in your network (labels)
GO.0016192	vesicle-mediated transport	11	2.94e-07	ENSP00000249647,ENSP00000263816,ENSP00000263864,ENSP00000264908,ENSP00000317332,ENSP00000347244,ENSP00000365745,ENSP00000369318,ENSP00000370719,ENSP00000376024,ENSP00000385834	ANXA3,CTTN,ITSN1,ITSN2,LRP2,RHOBTB3,SNAP23,SNX18,SNX9,TF,VAMP8								5032	Morphine addiction	17	1.02e-27	ENSP00000243052,ENSP00000259455,ENSP00000260600,ENSP00000261837,ENSP00000262493,ENSP00000263431,ENSP00000294016,ENSP00000294117,ENSP00000310661,ENSP00000327652,ENSP00000332116,ENSP00000334910,ENSP00000355556,ENSP00000357067,ENSP00000371594,ENSP00000419361,ENSP00000438284	ADCY3,ADCY5,ADCY9,DRD1,GABBR2,GNAO1,GNB5,GNG3,GNG4,GNG7,KCNJ9,PDE10A,PDE1B,PDE2A,PDE4B,PDE7B,PRKCG
GO.0006897	endocytosis	7	0.000165	ENSP00000263816,ENSP00000264908,ENSP00000317332,ENSP00000347244,ENSP00000365745,ENSP00000370719,ENSP00000376024	ANXA3,CTTN,ITSN1,ITSN2,LRP2,SNX18,SNX9								4725	Cholinergic synapse	11	3.4e-14	ENSP00000260600,ENSP00000261837,ENSP00000262493,ENSP00000263431,ENSP00000263826,ENSP00000282356,ENSP00000294016,ENSP00000294117,ENSP00000355556,ENSP00000371594,ENSP00000419361	ADCY3,ADCY5,ADCY9,AKT3,CAMK4,GNAO1,GNB5,GNG3,GNG4,GNG7,PRKCG
GO.0015031	protein transport	9	0.000165	ENSP00000054666,ENSP00000249647,ENSP00000263864,ENSP00000305647,ENSP00000317332,ENSP00000359025,ENSP00000365745,ENSP00000376024,ENSP00000385834	CTTN,SNAP23,SNX18,SNX9,STXBP3,TF,VAMP3,VAMP5,VAMP8								4727	GABAergic synapse	10	9.04e-14	ENSP00000259455,ENSP00000260600,ENSP00000261837,ENSP00000262493,ENSP00000263431,ENSP00000294016,ENSP00000294117,ENSP00000355556,ENSP00000371594,ENSP00000419361	ADCY3,ADCY5,ADCY9,GABBR2,GNAO1,GNB5,GNG3,GNG4,GNG7,PRKCG
GO.0016050	vesicle organization	5	0.000746	ENSP00000249647,ENSP00000263864,ENSP00000305647,ENSP00000317332,ENSP00000376024	SNAP23,SNX18,SNX9,VAMP5,VAMP8								4728	Dopaminergic synapse	11	9.04e-14	ENSP00000261837,ENSP00000262493,ENSP00000263431,ENSP00000263826,ENSP00000294117,ENSP00000327652,ENSP00000354859,ENSP00000355556,ENSP00000357067,ENSP00000371594,ENSP00000419361	ADCY5,AKT3,DRD1,DRD2,GNAO1,GNB5,GNG3,GNG4,GNG7,KCNJ9,PRKCG
GO.0006892	post-Golgi vesicle-mediated transport	4	0.00202	ENSP00000054666,ENSP00000249647,ENSP00000263864,ENSP00000305647	SNAP23,VAMP3,VAMP5,VAMP8								4713	Circadian entrainment	10	1.59e-13	ENSP00000260600,ENSP00000261837,ENSP00000262493,ENSP00000263431,ENSP00000294016,ENSP00000294117,ENSP00000355556,ENSP00000357067,ENSP00000371594,ENSP00000419361	ADCY3,ADCY5,ADCY9,GNAO1,GNB5,GNG3,GNG4,GNG7,KCNJ9,PRKCG
KEGG													8-GTPase Signal Transduction
pathway ID	pathway description	observed gene count	false discovery rate	matching proteins in your network (IDs)	matching proteins in your network (labels)								GO Biological Process
4130	SNARE interactions in vesicular transport	4	2.54e-06	ENSP00000054666,ENSP00000249647,ENSP00000263864,ENSP00000305647	SNAP23,VAMP3,VAMP5,VAMP8								pathway ID	pathway description	observed gene count	false discovery rate	matching proteins in your network (IDs)	matching proteins in your network (labels)
													GO.0007264	small GTPase mediated signal transduction	20	2.98e-19	ENSP00000216127,ENSP00000240874,ENSP00000260130,ENSP00000260404,ENSP00000263674,ENSP00000264051,ENSP00000266037,ENSP00000276297,ENSP00000278568,ENSP00000286827,ENSP00000310561,ENSP00000314458,ENSP00000316845,ENSP00000320038,ENSP00000322957,ENSP00000353864,ENSP00000371341,ENSP00000386741,ENSP00000404179,ENSP00000427926	ARHGAP32,ARHGAP33,ARHGEF17,ARHGEF4,CDC42,CHN1,DLC1,DOCK3,DOCK4,KALRN,NGEF,PAK1,PAK3,PAK6,PAK7,RASD2,RHOBTB2,SDCBP,TIAM1,TNK2
9-G-Protein Coupled Receptor Signaling													GO.1902531	regulation of intracellular signal transduction	20	1.81e-13	ENSP00000216127,ENSP00000240874,ENSP00000260130,ENSP00000260404,ENSP00000263674,ENSP00000264051,ENSP00000276297,ENSP00000278568,ENSP00000281821,ENSP00000286827,ENSP00000310561,ENSP00000316845,ENSP00000320038,ENSP00000322957,ENSP00000353864,ENSP00000381097,ENSP00000386741,ENSP00000419782,ENSP00000422591,ENSP00000427926	ARHGAP32,ARHGAP33,ARHGEF17,ARHGEF4,CDK5,CHN1,DLC1,EPHA4,EPHB1,KALRN,NGEF,PAK1,PAK3,PAK6,PAK7,RASD2,RHOBTB2,SDCBP,SLIT2,TIAM1
GO Biological Process													GO.0048013	ephrin receptor signaling pathway	10	2.73e-13	ENSP00000240874,ENSP00000260130,ENSP00000264051,ENSP00000278568,ENSP00000281821,ENSP00000286827,ENSP00000314458,ENSP00000353864,ENSP00000381097,ENSP00000386741	CDC42,CHN1,EPHA4,EPHB1,KALRN,NGEF,PAK1,PAK3,SDCBP,TIAM1
pathway ID	pathway description	observed gene count	false discovery rate	matching proteins in your network (IDs)	matching proteins in your network (labels)								GO.0051056	regulation of small GTPase mediated signal transduction	12	3.86e-13	ENSP00000240874,ENSP00000263674,ENSP00000264051,ENSP00000276297,ENSP00000286827,ENSP00000310561,ENSP00000314458,ENSP00000316845,ENSP00000320038,ENSP00000386741,ENSP00000422591,ENSP00000427926	ARHGAP32,ARHGAP33,ARHGEF17,ARHGEF4,CDC42,CHN1,DLC1,KALRN,NGEF,RHOBTB2,SLIT2,TIAM1
GO.0007186	G-protein coupled receptor signaling pathway	10	2.97e-06	ENSP00000248564,ENSP00000272644,ENSP00000272928,ENSP00000351605,ENSP00000354607,ENSP00000355627,ENSP00000356429,ENSP00000358867,ENSP00000360021,ENSP00000379514	ADCYAP1R1,AGT,CXCR7,FZD5,FZD6,GNAI3,GNG11,GNG12,GPR17,RGS1								GO.0007411	axon guidance	13	7.05e-12	ENSP00000240874,ENSP00000260130,ENSP00000264051,ENSP00000278568,ENSP00000281821,ENSP00000286827,ENSP00000314458,ENSP00000353864,ENSP00000356000,ENSP00000386741,ENSP00000393511,ENSP00000417335,ENSP00000422591	ABLIM2,CDC42,CHN1,EPHA4,KALRN,NGEF,PAK1,PAK3,PLXNA2,ROBO2,SDCBP,SLIT2,TIAM1
GO.0060070	canonical Wnt signaling pathway	4	0.00249	ENSP00000261349,ENSP00000274063,ENSP00000351605,ENSP00000354607	FZD5,FZD6,LRP6,SFRP2
GO.0071310	cellular response to organic substance	9	0.00249	ENSP00000232564,ENSP00000248564,ENSP00000257497,ENSP00000261349,ENSP00000272644,ENSP00000272928,ENSP00000360021,ENSP00000379514,ENSP00000386884	ADCYAP1R1,ANXA1,CXCR4,CXCR7,GNB4,GNG11,GNG12,GPR17,LRP6								KEGG
GO.0007267	cell-cell signaling	7	0.00288	ENSP00000257497,ENSP00000261349,ENSP00000274063,ENSP00000354607,ENSP00000355627,ENSP00000358867,ENSP00000360021	AGT,ANXA1,FZD5,GNAI3,GNG12,LRP6,SFRP2								pathway ID	pathway description	observed gene count	false discovery rate	matching proteins in your network (IDs)	matching proteins in your network (labels)
GO.0007399	nervous system development	9	0.00288	ENSP00000232564,ENSP00000257497,ENSP00000261349,ENSP00000274063,ENSP00000351605,ENSP00000354607,ENSP00000355627,ENSP00000360021,ENSP00000386884	AGT,ANXA1,CXCR4,FZD5,FZD6,GNB4,GNG12,LRP6,SFRP2								4360	Axon guidance	15	1.6e-23	ENSP00000260404,ENSP00000264051,ENSP00000278568,ENSP00000281821,ENSP00000301293,ENSP00000314458,ENSP00000322957,ENSP00000353864,ENSP00000356000,ENSP00000381097,ENSP00000389140,ENSP00000393511,ENSP00000417335,ENSP00000419782,ENSP00000422591	ABLIM2,CDC42,CDK5,DCC,EPHA4,EPHB1,NGEF,PAK1,PAK3,PAK6,PAK7,PLXNA2,ROBO2,SEMA6B,SLIT2
													4810	Regulation of actin cytoskeleton	7	3.12e-06	ENSP00000260404,ENSP00000278568,ENSP00000286827,ENSP00000314458,ENSP00000316845,ENSP00000322957,ENSP00000353864	ARHGEF4,CDC42,PAK1,PAK3,PAK6,PAK7,TIAM1
KEGG													5211	Renal cell carcinoma	5	3.9e-06	ENSP00000260404,ENSP00000278568,ENSP00000314458,ENSP00000322957,ENSP00000353864	CDC42,PAK1,PAK3,PAK6,PAK7
pathway ID	pathway description	observed gene count	false discovery rate	matching proteins in your network (IDs)	matching proteins in your network (labels)								4660	T cell receptor signaling pathway	5	2.51e-05	ENSP00000260404,ENSP00000278568,ENSP00000314458,ENSP00000322957,ENSP00000353864	CDC42,PAK1,PAK3,PAK6,PAK7
4713	Circadian entrainment	5	1.23e-06	ENSP00000232564,ENSP00000248564,ENSP00000358867,ENSP00000360021,ENSP00000379514	ADCYAP1R1,GNAI3,GNB4,GNG11,GNG12								4014	Ras signaling pathway	6	4.75e-05	ENSP00000260404,ENSP00000278568,ENSP00000286827,ENSP00000314458,ENSP00000322957,ENSP00000353864	CDC42,PAK1,PAK3,PAK6,PAK7,TIAM1
4062	Chemokine signaling pathway	5	1.89e-05	ENSP00000232564,ENSP00000248564,ENSP00000358867,ENSP00000360021,ENSP00000386884	CXCR4,GNAI3,GNB4,GNG11,GNG12
4727	GABAergic synapse	4	2.88e-05	ENSP00000232564,ENSP00000248564,ENSP00000358867,ENSP00000360021	GNAI3,GNB4,GNG11,GNG12								9-Synaptic Transmission/Calcium Transport
5032	Morphine addiction	4	2.88e-05	ENSP00000232564,ENSP00000248564,ENSP00000358867,ENSP00000360021	GNAI3,GNB4,GNG11,GNG12								GO Biological Process
4723	Retrograde endocannabinoid signaling	4	3.43e-05	ENSP00000232564,ENSP00000248564,ENSP00000358867,ENSP00000360021	GNAI3,GNB4,GNG11,GNG12								pathway ID	pathway description	observed gene count	false discovery rate	matching proteins in your network (IDs)	matching proteins in your network (labels)
													GO.0006816	calcium ion transport	11	1.16e-13	ENSP00000266376,ENSP00000288139,ENSP00000301050,ENSP00000320025,ENSP00000334198,ENSP00000349320,ENSP00000353362,ENSP00000355533,ENSP00000356545,ENSP00000360406,ENSP00000419101	CACNA1A,CACNA1B,CACNA1C,CACNA1D,CACNA1E,CACNA1H,CACNA2D1,CACNA2D3,CACNB2,CACNB3,RYR2
10-mRNA Processing													GO.0051924	regulation of calcium ion transport	11	1.16e-13	ENSP00000266376,ENSP00000288139,ENSP00000301050,ENSP00000317310,ENSP00000320025,ENSP00000349320,ENSP00000355533,ENSP00000360406,ENSP00000418081,ENSP00000419101,ENSP00000438949	CABP1,CACNA1B,CACNA1C,CACNA1D,CACNA2D1,CACNA2D2,CACNA2D3,CACNB2,CACNB3,CACNB4,RYR2
GO Biological Process													GO.0070588	calcium ion transmembrane transport	10	1.16e-13	ENSP00000288139,ENSP00000301050,ENSP00000320025,ENSP00000334198,ENSP00000349320,ENSP00000353362,ENSP00000355533,ENSP00000356545,ENSP00000360406,ENSP00000419101	CACNA1A,CACNA1B,CACNA1D,CACNA1E,CACNA1H,CACNA2D1,CACNA2D3,CACNB2,CACNB3,RYR2
pathway ID	pathway description	observed gene count	false discovery rate	matching proteins in your network (IDs)	matching proteins in your network (labels)								GO.0034765	regulation of ion transmembrane transport	12	5.26e-13	ENSP00000288139,ENSP00000301050,ENSP00000317310,ENSP00000320025,ENSP00000334198,ENSP00000349320,ENSP00000353362,ENSP00000355533,ENSP00000356545,ENSP00000360406,ENSP00000418081,ENSP00000419101	CABP1,CACNA1A,CACNA1B,CACNA1D,CACNA1E,CACNA1H,CACNA2D1,CACNA2D2,CACNA2D3,CACNB2,CACNB3,RYR2
GO.0006396	RNA processing	10	1.51e-08	ENSP00000246194,ENSP00000264670,ENSP00000265866,ENSP00000325376,ENSP00000334538,ENSP00000346694,ENSP00000348538,ENSP00000359988,ENSP00000376309,ENSP00000380033	DDX17,HNRNPA2B1,HNRNPA3,HNRNPH3,HNRNPM,NSUN2,RALY,RBM38,SREK1,SRSF11								GO.0051899	membrane depolarization	8	8.6e-13	ENSP00000266376,ENSP00000288139,ENSP00000301050,ENSP00000334198,ENSP00000353362,ENSP00000356545,ENSP00000360406,ENSP00000438949	CACNA1A,CACNA1B,CACNA1C,CACNA1D,CACNA1E,CACNA1H,CACNB3,CACNB4
GO.0008380	RNA splicing	8	6.59e-08	ENSP00000246194,ENSP00000265866,ENSP00000325376,ENSP00000334538,ENSP00000346694,ENSP00000348538,ENSP00000359988,ENSP00000376309	HNRNPA2B1,HNRNPA3,HNRNPH3,HNRNPM,RALY,RBM38,SREK1,SRSF11
GO.0006397	mRNA processing	8	1.76e-07	ENSP00000246194,ENSP00000265866,ENSP00000325376,ENSP00000334538,ENSP00000346694,ENSP00000348538,ENSP00000359988,ENSP00000376309	HNRNPA2B1,HNRNPA3,HNRNPH3,HNRNPM,RALY,RBM38,SREK1,SRSF11								KEGG
GO.0000398	mRNA splicing, via spliceosome	6	6.19e-06	ENSP00000246194,ENSP00000265866,ENSP00000325376,ENSP00000346694,ENSP00000359988,ENSP00000376309	HNRNPA2B1,HNRNPA3,HNRNPH3,HNRNPM,RALY,SRSF11								pathway ID	pathway description	observed gene count	false discovery rate	matching proteins in your network (IDs)	matching proteins in your network (labels)
GO.0010467	gene expression	11	0.00195	ENSP00000246194,ENSP00000264670,ENSP00000265866,ENSP00000325376,ENSP00000334538,ENSP00000346694,ENSP00000348538,ENSP00000359988,ENSP00000376309,ENSP00000380033,ENSP00000385269	DDX17,ELAVL1,HNRNPA2B1,HNRNPA3,HNRNPH3,HNRNPM,NSUN2,RALY,RBM38,SREK1,SRSF11								4261	Adrenergic signaling in cardiomyocytes	13	2.51e-21	ENSP00000164133,ENSP00000266376,ENSP00000288139,ENSP00000301050,ENSP00000320025,ENSP00000349320,ENSP00000355533,ENSP00000359719,ENSP00000412324,ENSP00000417963,ENSP00000418081,ENSP00000419101,ENSP00000438949	CACNA1C,CACNA1D,CACNA2D1,CACNA2D2,CACNA2D3,CACNB2,CACNB3,CACNB4,PPP2R5B,PPP2R5C,PPP2R5D,PRKACB,RYR2
													4010	MAPK signaling pathway	13	2.8e-18	ENSP00000266376,ENSP00000288139,ENSP00000301050,ENSP00000320025,ENSP00000334198,ENSP00000349320,ENSP00000353362,ENSP00000356545,ENSP00000359719,ENSP00000360406,ENSP00000418081,ENSP00000419101,ENSP00000438949	CACNA1A,CACNA1B,CACNA1C,CACNA1D,CACNA1E,CACNA1H,CACNA2D1,CACNA2D2,CACNA2D3,CACNB2,CACNB3,CACNB4,PRKACB
11-Wound Healing and Inflammation													5414	Dilated cardiomyopathy	10	4.15e-17	ENSP00000266376,ENSP00000288139,ENSP00000301050,ENSP00000320025,ENSP00000349320,ENSP00000355533,ENSP00000359719,ENSP00000418081,ENSP00000419101,ENSP00000438949	CACNA1C,CACNA1D,CACNA2D1,CACNA2D2,CACNA2D3,CACNB2,CACNB3,CACNB4,PRKACB,RYR2
GO Biological Process													5412	Arrhythmogenic right ventricular cardiomyopathy (ARVC)	9	1.15e-15	ENSP00000266376,ENSP00000288139,ENSP00000301050,ENSP00000320025,ENSP00000349320,ENSP00000355533,ENSP00000418081,ENSP00000419101,ENSP00000438949	CACNA1C,CACNA1D,CACNA2D1,CACNA2D2,CACNA2D3,CACNB2,CACNB3,CACNB4,RYR2
pathway ID	pathway description	observed gene count	false discovery rate	matching proteins in your network (IDs)	matching proteins in your network (labels)								4260	Cardiac muscle contraction	9	1.19e-15	ENSP00000266376,ENSP00000288139,ENSP00000301050,ENSP00000320025,ENSP00000349320,ENSP00000355533,ENSP00000418081,ENSP00000419101,ENSP00000438949	CACNA1C,CACNA1D,CACNA2D1,CACNA2D2,CACNA2D3,CACNB2,CACNB3,CACNB4,RYR2
GO.0002576	platelet degranulation	8	2.57e-12	ENSP00000218388,ENSP00000221930,ENSP00000231061,ENSP00000257857,ENSP00000261405,ENSP00000278407,ENSP00000348068,ENSP00000355896	CD63,SERPINA1,SERPING1,SPARC,TGFB1,TGFB2,TIMP1,VWF
GO.0030168	platelet activation	8	3.45e-09	ENSP00000218388,ENSP00000221930,ENSP00000231061,ENSP00000257857,ENSP00000261405,ENSP00000278407,ENSP00000348068,ENSP00000355896	CD63,SERPINA1,SERPING1,SPARC,TGFB1,TGFB2,TIMP1,VWF								10-Phospholipid Metaboism
GO.0042060	wound healing	10	3.45e-09	ENSP00000218388,ENSP00000221930,ENSP00000231061,ENSP00000257857,ENSP00000261405,ENSP00000266085,ENSP00000278407,ENSP00000333203,ENSP00000348068,ENSP00000355896	CD63,SERPINA1,SERPINA5,SERPING1,SPARC,TGFB1,TGFB2,TIMP1,TIMP3,VWF								GO Biological Process
GO.0007596	blood coagulation	9	1.05e-08	ENSP00000218388,ENSP00000221930,ENSP00000231061,ENSP00000257857,ENSP00000261405,ENSP00000278407,ENSP00000333203,ENSP00000348068,ENSP00000355896	CD63,SERPINA1,SERPINA5,SERPING1,SPARC,TGFB1,TGFB2,TIMP1,VWF								pathway ID	pathway description	observed gene count	false discovery rate	matching proteins in your network (IDs)	matching proteins in your network (labels)
GO.0051248	negative regulation of protein metabolic process	9	1.79e-06	ENSP00000218388,ENSP00000221930,ENSP00000266085,ENSP00000278407,ENSP00000295228,ENSP00000333203,ENSP00000345395,ENSP00000348068,ENSP00000355896	INHBB,PAPLN,SERPINA1,SERPINA5,SERPING1,TGFB1,TGFB2,TIMP1,TIMP3								GO.0006796	phosphate-containing compound metabolic process	13	4.41e-09	ENSP00000228027,ENSP00000251473,ENSP00000260585,ENSP00000282541,ENSP00000284061,ENSP00000288490,ENSP00000309757,ENSP00000317300,ENSP00000352547,ENSP00000352962,ENSP00000355963,ENSP00000359204,ENSP00000412178	DGAT2,DGKE,DGKI,DGKZ,EPT1,GPAT2,GPD1L,LPCAT4,LPGAT1,LPL,LPPR2,LPPR3,LPPR4
													GO.0006629	lipid metabolic process	11	1.54e-08	ENSP00000228027,ENSP00000260585,ENSP00000282541,ENSP00000284061,ENSP00000309757,ENSP00000317300,ENSP00000352547,ENSP00000355963,ENSP00000359204,ENSP00000371532,ENSP00000412178	DGAT2,DGKE,DGKZ,EPT1,GPAT2,GPD1L,LPCAT4,LPGAT1,LPL,LPPR4,VLDLR
KEGG													GO.0006644	phospholipid metabolic process	8	1.86e-08	ENSP00000228027,ENSP00000260585,ENSP00000282541,ENSP00000284061,ENSP00000309757,ENSP00000317300,ENSP00000352547,ENSP00000355963	DGAT2,DGKE,EPT1,GPAT2,GPD1L,LPCAT4,LPGAT1,LPL
pathway ID	pathway description	observed gene count	false discovery rate	matching proteins in your network (IDs)	matching proteins in your network (labels)								GO.0044255	cellular lipid metabolic process	10	2.86e-08	ENSP00000228027,ENSP00000260585,ENSP00000282541,ENSP00000284061,ENSP00000309757,ENSP00000317300,ENSP00000352547,ENSP00000355963,ENSP00000359204,ENSP00000412178	DGAT2,DGKE,DGKZ,EPT1,GPAT2,GPD1L,LPCAT4,LPGAT1,LPL,LPPR4
4350	TGF-beta signaling pathway	4	2.59e-05	ENSP00000221930,ENSP00000295228,ENSP00000355896,ENSP00000386043	INHBB,LTBP1,TGFB1,TGFB2								GO.0008654	phospholipid biosynthetic process	7	1.62e-07	ENSP00000228027,ENSP00000260585,ENSP00000282541,ENSP00000284061,ENSP00000317300,ENSP00000352547,ENSP00000355963	DGAT2,DGKE,EPT1,GPAT2,GPD1L,LPCAT4,LPGAT1
4610	Complement and coagulation cascades	4	2.59e-05	ENSP00000261405,ENSP00000278407,ENSP00000333203,ENSP00000348068	SERPINA1,SERPINA5,SERPING1,VWF
5205	Proteoglycans in cancer	4	0.0011	ENSP00000221930,ENSP00000257857,ENSP00000266085,ENSP00000355896	CD63,TGFB1,TGFB2,TIMP3								KEGG
4060	Cytokine-cytokine receptor interaction	3	0.0259	ENSP00000221930,ENSP00000295228,ENSP00000355896	INHBB,TGFB1,TGFB2								pathway ID	pathway description	observed gene count	false discovery rate	matching proteins in your network (IDs)	matching proteins in your network (labels)
5140	Leishmaniasis	2	0.0259	ENSP00000221930,ENSP00000355896	TGFB1,TGFB2								564	Glycerophospholipid metabolism	8	2.01e-13	ENSP00000260585,ENSP00000282541,ENSP00000284061,ENSP00000288490,ENSP00000317300,ENSP00000352547,ENSP00000355963,ENSP00000412178	DGKE,DGKI,DGKZ,EPT1,GPAT2,GPD1L,LPCAT4,LPGAT1
													561	Glycerolipid metabolism	6	1.79e-10	ENSP00000228027,ENSP00000284061,ENSP00000288490,ENSP00000309757,ENSP00000352547,ENSP00000412178	DGAT2,DGKE,DGKI,DGKZ,GPAT2,LPL
12-Extracellular Matrix Organization													1100	Metabolic pathways	8	4.52e-05	ENSP00000216254,ENSP00000228027,ENSP00000260585,ENSP00000284061,ENSP00000288490,ENSP00000317300,ENSP00000352547,ENSP00000412178	ACO2,DGAT2,DGKE,DGKI,DGKZ,EPT1,GPAT2,LPCAT4
GO Biological Process													4070	Phosphatidylinositol signaling system	3	0.00168	ENSP00000284061,ENSP00000288490,ENSP00000412178	DGKE,DGKI,DGKZ
pathway ID	pathway description	observed gene count	false discovery rate	matching proteins in your network (IDs)	matching proteins in your network (labels)								565	Ether lipid metabolism	2	0.0221	ENSP00000260585,ENSP00000317300	EPT1,LPCAT4
GO.0030198	extracellular matrix organization	6	0.000122	ENSP00000265131,ENSP00000296585,ENSP00000331210,ENSP00000386896,ENSP00000400365,ENSP00000452120	BCAN,ITGA2,ITGA6,ITGA7,LAMA2,TNC
GO.0007155	cell adhesion	6	0.0175	ENSP00000265131,ENSP00000296585,ENSP00000331210,ENSP00000358866,ENSP00000400365,ENSP00000452120	BCAN,FLNA,ITGA2,ITGA7,LAMA2,TNC								11-Protein Ubiquitantion
GO.0007229	integrin-mediated signaling pathway	3	0.0292	ENSP00000296585,ENSP00000386896,ENSP00000452120	ITGA2,ITGA6,ITGA7								GO Biological Process
GO.0033627	cell adhesion mediated by integrin	2	0.0477	ENSP00000296585,ENSP00000386896	ITGA2,ITGA6								pathway ID	pathway description	observed gene count	false discovery rate	matching proteins in your network (IDs)	matching proteins in your network (labels)
													GO.0016567	protein ubiquitination	8	1.37e-05	ENSP00000263925,ENSP00000354775,ENSP00000355014,ENSP00000383199,ENSP00000424198,ENSP00000430237,ENSP00000433352,ENSP00000443191	KLHL13,KLHL2,LMO7,LNX1,NEDD4L,PJA1,PJA2,RNF130
KEGG													GO.0030163	protein catabolic process	6	0.00352	ENSP00000263925,ENSP00000265094,ENSP00000265339,ENSP00000342121,ENSP00000355014,ENSP00000383199	FBXW11,LNX1,NEDD4L,PJA1,RNF6,UBE2B
#pathway ID	pathway description	observed gene count	false discovery rate	matching proteins in your network (IDs)	matching proteins in your network (labels)								GO.0070936	protein K48-linked ubiquitination	3	0.014	ENSP00000265339,ENSP00000342121,ENSP00000383199	NEDD4L,RNF6,UBE2B
4510	Focal adhesion	6	1.22e-07	ENSP00000265131,ENSP00000296585,ENSP00000358866,ENSP00000386896,ENSP00000400365,ENSP00000452120	FLNA,ITGA2,ITGA6,ITGA7,LAMA2,TNC								GO.0000209	protein polyubiquitination	4	0.0146	ENSP00000265094,ENSP00000265339,ENSP00000342121,ENSP00000383199	FBXW11,NEDD4L,RNF6,UBE2B
4512	ECM-receptor interaction	5	1.22e-07	ENSP00000265131,ENSP00000296585,ENSP00000386896,ENSP00000400365,ENSP00000452120	ITGA2,ITGA6,ITGA7,LAMA2,TNC								GO.0006511	ubiquitin-dependent protein catabolic process	5	0.0146	ENSP00000263925,ENSP00000265094,ENSP00000265339,ENSP00000342121,ENSP00000383199	FBXW11,LNX1,NEDD4L,RNF6,UBE2B
4810	Regulation of actin cytoskeleton	5	5.55e-06	ENSP00000269033,ENSP00000296585,ENSP00000298159,ENSP00000386896,ENSP00000452120	CFL2,ITGA2,ITGA6,ITGA7,SSH2
5412	Arrhythmogenic right ventricular cardiomyopathy (ARVC)	4	5.55e-06	ENSP00000296585,ENSP00000386896,ENSP00000400365,ENSP00000452120	ITGA2,ITGA6,ITGA7,LAMA2								KEGG
5410	Hypertrophic cardiomyopathy (HCM)	4	6.65e-06	ENSP00000296585,ENSP00000386896,ENSP00000400365,ENSP00000452120	ITGA2,ITGA6,ITGA7,LAMA2								pathway ID	pathway description	observed gene count	false discovery rate	matching proteins in your network (IDs)	matching proteins in your network (labels)
													4120	Ubiquitin mediated proteolysis	4	0.000652	ENSP00000265094,ENSP00000265428,ENSP00000383199,ENSP00000443191	FBXW11,KLHL13,NEDD4L,WWP1
13-Inflammation/Regulation of Transciption
GO Biological Process													12-MAPK1 Signaling
pathway ID	pathway description	observed gene count	false discovery rate	matching proteins in your network (IDs)	matching proteins in your network (labels)								GO Biological Process
GO.0042542	response to hydrogen peroxide	5	3.72e-05	ENSP00000239223,ENSP00000360266,ENSP00000376436,ENSP00000380252,ENSP00000419923	DUSP1,ETS1,JUN,KLF6,NFE2L2								pathway ID	pathway description	observed gene count	false discovery rate	matching proteins in your network (IDs)	matching proteins in your network (labels)
GO.0045944	positive regulation of transcription from RNA polymerase II promoter	8	0.000124	ENSP00000231509,ENSP00000344352,ENSP00000360266,ENSP00000374455,ENSP00000376436,ENSP00000380252,ENSP00000387699,ENSP00000419923	ATF3,CREB1,ETS1,JUN,KLF6,NFE2L2,NR3C1,SQSTM1								GO.0016311	dephosphorylation	6	2.71e-05	ENSP00000279488,ENSP00000283228,ENSP00000295598,ENSP00000309116,ENSP00000329539,ENSP00000351342	ATP1A1,DUSP6,DUSP8,PTPN5,PTPN7,PTPRR
GO.0010035	response to inorganic substance	6	0.000284	ENSP00000239223,ENSP00000360266,ENSP00000376436,ENSP00000380252,ENSP00000387699,ENSP00000419923	CREB1,DUSP1,ETS1,JUN,KLF6,NFE2L2								GO.0035335	peptidyl-tyrosine dephosphorylation	5	2.71e-05	ENSP00000279488,ENSP00000283228,ENSP00000309116,ENSP00000329539,ENSP00000351342	DUSP6,DUSP8,PTPN5,PTPN7,PTPRR
GO.0006357	regulation of transcription from RNA polymerase II promoter	8	0.00234	ENSP00000231509,ENSP00000329212,ENSP00000360266,ENSP00000374455,ENSP00000376436,ENSP00000380252,ENSP00000387699,ENSP00000419923	ATF7,CREB1,ETS1,JUN,KLF6,NFE2L2,NR3C1,SQSTM1								GO.0071383	cellular response to steroid hormone stimulus	5	6.59e-05	ENSP00000295598,ENSP00000302397,ENSP00000332296,ENSP00000348827,ENSP00000352900	ATP1A1,ATP1A3,RARB,RXRG,THRB
GO.0009267	cellular response to starvation	4	0.00445	ENSP00000344352,ENSP00000360266,ENSP00000374455,ENSP00000380252	ATF3,JUN,NFE2L2,SQSTM1								GO.0071396	cellular response to lipid	6	0.000108	ENSP00000215832,ENSP00000295598,ENSP00000302397,ENSP00000332296,ENSP00000348827,ENSP00000352900	ATP1A1,ATP1A3,MAPK1,RARB,RXRG,THRB
													GO.0006796	phosphate-containing compound metabolic process	9	0.000137	ENSP00000215832,ENSP00000279488,ENSP00000283228,ENSP00000295598,ENSP00000309116,ENSP00000329539,ENSP00000350785,ENSP00000351342,ENSP00000378485	ATP1A1,DAPK1,DUSP6,DUSP8,MAPK1,MATK,PTPN5,PTPN7,PTPRR
KEGG
pathway ID	pathway description	observed gene count	false discovery rate	matching proteins in your network (IDs)	matching proteins in your network (labels)								KEGG
4915	Estrogen signaling pathway	3	0.00361	ENSP00000338160,ENSP00000360266,ENSP00000387699	CREB1,FKBP5,JUN								pathway ID	pathway description	observed gene count	false discovery rate	matching proteins in your network (IDs)	matching proteins in your network (labels)
5166	HTLV-I infection	4	0.00361	ENSP00000344352,ENSP00000360266,ENSP00000376436,ENSP00000387699	ATF3,CREB1,ETS1,JUN								4010	MAPK signaling pathway	6	9.16e-07	ENSP00000215832,ENSP00000279488,ENSP00000283228,ENSP00000309116,ENSP00000329539,ENSP00000351342	DUSP6,DUSP8,MAPK1,PTPN5,PTPN7,PTPRR
4380	Osteoclast differentiation	3	0.00555	ENSP00000360266,ENSP00000374455,ENSP00000387699	CREB1,JUN,SQSTM1								4919	Thyroid hormone signaling pathway	5	9.16e-07	ENSP00000215832,ENSP00000295598,ENSP00000302397,ENSP00000348827,ENSP00000352900	ATP1A1,ATP1A3,MAPK1,RXRG,THRB
5030	Cocaine addiction	2	0.0309	ENSP00000360266,ENSP00000387699	CREB1,JUN								4960	Aldosterone-regulated sodium reabsorption	3	0.000135	ENSP00000215832,ENSP00000295598,ENSP00000302397	ATP1A1,ATP1A3,MAPK1
5031	Amphetamine addiction	2	0.0363	ENSP00000360266,ENSP00000387699	CREB1,JUN								5223	Non-small cell lung cancer	3	0.00035	ENSP00000215832,ENSP00000332296,ENSP00000352900	MAPK1,RARB,RXRG
													5200	Pathways in cancer	4	0.00216	ENSP00000215832,ENSP00000332296,ENSP00000350785,ENSP00000352900	DAPK1,MAPK1,RARB,RXRG
14-Lipid Transport and Storage
GO Biological Process													13-Nervous System Development
pathway ID	pathway description	observed gene count	false discovery rate	matching proteins in your network (IDs)	matching proteins in your network (labels)								GO Biological Process
GO.0010885	regulation of cholesterol storage	3	0.000455	ENSP00000262735,ENSP00000308165,ENSP00000363868	ABCA1,CD36,PPARA								pathway ID	pathway description	observed gene count	false discovery rate	matching proteins in your network (IDs)	matching proteins in your network (labels)
GO.0009755	hormone-mediated signaling pathway	4	0.000928	ENSP00000252595,ENSP00000262735,ENSP00000325819,ENSP00000419692	NR2F1,PPARA,RXRA,SLC27A1								GO.0006468	protein phosphorylation	8	0.000124	ENSP00000009105,ENSP00000256460,ENSP00000261937,ENSP00000262445,ENSP00000359635,ENSP00000365301,ENSP00000368124,ENSP00000405950	CAMK1,CAMK1D,CAMK1G,FGF13,FGF14,FLT4,MAP2K4,PNCK
GO.0010743	regulation of macrophage derived foam cell differentiation	3	0.00173	ENSP00000262735,ENSP00000308165,ENSP00000363868	ABCA1,CD36,PPARA								GO.0006796	phosphate-containing compound metabolic process	10	0.000124	ENSP00000009105,ENSP00000256460,ENSP00000261937,ENSP00000262445,ENSP00000272298,ENSP00000324172,ENSP00000359635,ENSP00000365301,ENSP00000368124,ENSP00000405950	ATP2B2,CALM2,CAMK1,CAMK1D,CAMK1G,FGF13,FGF14,FLT4,MAP2K4,PNCK
GO.0071396	cellular response to lipid	5	0.00194	ENSP00000262735,ENSP00000308165,ENSP00000325819,ENSP00000363868,ENSP00000419692	ABCA1,CD36,NR2F1,PPARA,RXRA								GO.0007399	nervous system development	9	0.0027	ENSP00000256460,ENSP00000261173,ENSP00000272298,ENSP00000284292,ENSP00000359635,ENSP00000365301,ENSP00000368124,ENSP00000377372,ENSP00000413496	ATP2B1,CALM2,CAMK1,CAMK1D,FGF12,FGF13,FGF14,GAP43,NRGN
GO.0044255	cellular lipid metabolic process	6	0.00222	ENSP00000262735,ENSP00000300056,ENSP00000301455,ENSP00000308165,ENSP00000363868,ENSP00000419692	ABCA1,ANGPTL4,CD36,PEX11A,PPARA,RXRA								GO.0043270	positive regulation of ion transport	4	0.0269	ENSP00000272298,ENSP00000324172,ENSP00000365301,ENSP00000413496	ATP2B2,CALM2,FGF12,FGF14
													GO.0048731	system development	10	0.0269	ENSP00000256460,ENSP00000261173,ENSP00000261937,ENSP00000272298,ENSP00000284292,ENSP00000359635,ENSP00000365301,ENSP00000368124,ENSP00000377372,ENSP00000413496	ATP2B1,CALM2,CAMK1,CAMK1D,FGF12,FGF13,FGF14,FLT4,GAP43,NRGN
KEGG
pathway ID	pathway description	observed gene count	false discovery rate	matching proteins in your network (IDs)	matching proteins in your network (labels)								KEGG
3320	PPAR signaling pathway	5	4.56e-08	ENSP00000252595,ENSP00000262735,ENSP00000301455,ENSP00000308165,ENSP00000419692	ANGPTL4,CD36,PPARA,RXRA,SLC27A1								pathway ID	pathway description	observed gene count	false discovery rate	matching proteins in your network (IDs)	matching proteins in your network (labels)
4920	Adipocytokine signaling pathway	3	0.00078	ENSP00000262735,ENSP00000308165,ENSP00000419692	CD36,PPARA,RXRA								4921	Oxytocin signaling pathway	4	0.00108	ENSP00000009105,ENSP00000256460,ENSP00000368124,ENSP00000373884	CAMK1,CAMK1D,CAMK1G,RYR3
4975	Fat digestion and absorption	2	0.0184	ENSP00000308165,ENSP00000363868	ABCA1,CD36								4014	Ras signaling pathway	4	0.00116	ENSP00000261937,ENSP00000359635,ENSP00000365301,ENSP00000413496	FGF12,FGF13,FGF14,FLT4
													4015	Rap1 signaling pathway	4	0.00116	ENSP00000261937,ENSP00000359635,ENSP00000365301,ENSP00000413496	FGF12,FGF13,FGF14,FLT4
15-GTPase Signaling/Actin Cytoskeleton													5218	Melanoma	3	0.00116	ENSP00000359635,ENSP00000365301,ENSP00000413496	FGF12,FGF13,FGF14
GO Biological Process													4010	MAPK signaling pathway	4	0.0013	ENSP00000262445,ENSP00000359635,ENSP00000365301,ENSP00000413496	FGF12,FGF13,FGF14,MAP2K4
pathway ID	pathway description	observed gene count	false discovery rate	matching proteins in your network (IDs)	matching proteins in your network (labels)
GO.0030029	actin filament-based process	7	3.97e-06	ENSP00000228945,ENSP00000247170,ENSP00000274867,ENSP00000288670,ENSP00000355652,ENSP00000378288,ENSP00000446714	ARHGDIB,DAAM1,DAAM2,FMNL2,MYL6,MYLK3,RHOU								14-Neurotransmitter Transport
GO.0007264	small GTPase mediated signal transduction	7	4.81e-05	ENSP00000228945,ENSP00000247170,ENSP00000285735,ENSP00000288670,ENSP00000338671,ENSP00000347134,ENSP00000446714	ARHGDIB,DAAM1,FMNL2,MYL6,NET1,RHOBTB1,RHOC								GO Biological Process
GO.0030036	actin cytoskeleton organization	6	5.71e-05	ENSP00000228945,ENSP00000247170,ENSP00000274867,ENSP00000288670,ENSP00000355652,ENSP00000378288	ARHGDIB,DAAM1,DAAM2,FMNL2,MYLK3,RHOU								pathway ID	pathway description	observed gene count	false discovery rate	matching proteins in your network (IDs)	matching proteins in your network (labels)
GO.0051056	regulation of small GTPase mediated signal transduction	5	0.000161	ENSP00000228945,ENSP00000285735,ENSP00000338671,ENSP00000347134,ENSP00000355652	ARHGDIB,NET1,RHOBTB1,RHOC,RHOU								GO.0001505	regulation of neurotransmitter levels	9	3.63e-13	ENSP00000221459,ENSP00000255224,ENSP00000259271,ENSP00000261205,ENSP00000272198,ENSP00000307900,ENSP00000350928,ENSP00000354111,ENSP00000384892	DNAJC5,GAD1,GAD2,GLUL,LIN7B,PPFIA4,RIMS2,SYT1,SYT4
GO.1902531	regulation of intracellular signal transduction	6	0.0452	ENSP00000228945,ENSP00000285735,ENSP00000338671,ENSP00000347134,ENSP00000348822,ENSP00000355652	ARHGDIB,NET1,RHOBTB1,RHOC,RHOU,SEMA4D								GO.0006836	neurotransmitter transport	9	3.63e-13	ENSP00000221459,ENSP00000255224,ENSP00000259271,ENSP00000261205,ENSP00000272198,ENSP00000307900,ENSP00000350928,ENSP00000354111,ENSP00000384892	DNAJC5,GAD1,GAD2,GLUL,LIN7B,PPFIA4,RIMS2,SYT1,SYT4
													GO.0007269	neurotransmitter secretion	8	7.25e-12	ENSP00000221459,ENSP00000255224,ENSP00000259271,ENSP00000261205,ENSP00000272198,ENSP00000350928,ENSP00000354111,ENSP00000384892	DNAJC5,GAD1,GAD2,LIN7B,PPFIA4,RIMS2,SYT1,SYT4
16-Cell Signaling													GO.0007268	synaptic transmission	10	3.15e-10	ENSP00000221459,ENSP00000255224,ENSP00000259271,ENSP00000261205,ENSP00000272198,ENSP00000296452,ENSP00000307900,ENSP00000350928,ENSP00000354111,ENSP00000384892	BSN,DNAJC5,GAD1,GAD2,GLUL,LIN7B,PPFIA4,RIMS2,SYT1,SYT4
GO Biological Process													GO.1903861	positive regulation of dendrite extension	5	1.13e-09	ENSP00000255224,ENSP00000261205,ENSP00000384892,ENSP00000428417,ENSP00000429562	RIMS1,RIMS2,SYT1,SYT4,UNC13A
pathway ID	pathway description	observed gene count	false discovery rate	matching proteins in your network (IDs)	matching proteins in your network (labels)
GO.0071681	cellular response to indole-3-methanol	2	0.0119	ENSP00000311113,ENSP00000344456	CTNNB1,JUP								KEGG
GO.0051149	positive regulation of muscle cell differentiation	3	0.0236	ENSP00000267859,ENSP00000344456,ENSP00000361423	ABL1,BNIP2,CTNNB1								pathway ID	pathway description	observed gene count	false discovery rate	matching proteins in your network (IDs)	matching proteins in your network (labels)
GO.0044093	positive regulation of molecular function	6	0.0428	ENSP00000267859,ENSP00000268182,ENSP00000277120,ENSP00000311113,ENSP00000344456,ENSP00000361423	ABL1,BNIP2,CTNNB1,IQGAP1,JUP,NTRK2								250	Alanine, aspartate and glutamate metabolism	3	0.000473	ENSP00000259271,ENSP00000307900,ENSP00000350928	GAD1,GAD2,GLUL
GO.0010001	glial cell differentiation	3	0.0439	ENSP00000277120,ENSP00000344456,ENSP00000361423	ABL1,CTNNB1,NTRK2								4721	Synaptic vesicle cycle	3	0.00122	ENSP00000215095,ENSP00000261205,ENSP00000429562	STX1B,SYT1,UNC13A
GO.0042659	regulation of cell fate specification	2	0.0439	ENSP00000311113,ENSP00000344456	CTNNB1,JUP								430	Taurine and hypotaurine metabolism	2	0.00163	ENSP00000259271,ENSP00000350928	GAD1,GAD2
													4727	GABAergic synapse	3	0.00163	ENSP00000259271,ENSP00000307900,ENSP00000350928	GAD1,GAD2,GLUL
KEGG													650	Butanoate metabolism	2	0.00804	ENSP00000259271,ENSP00000350928	GAD1,GAD2
pathway ID	pathway description	observed gene count	false discovery rate	matching proteins in your network (IDs)	matching proteins in your network (labels)
4520	Adherens junction	2	0.0319	ENSP00000268182,ENSP00000344456	CTNNB1,IQGAP1								15-Synaptic Reuptake
5130	Pathogenic Escherichia coli infection	2	0.0319	ENSP00000344456,ENSP00000361423	ABL1,CTNNB1								GO Biological Process
5200	Pathways in cancer	3	0.0319	ENSP00000311113,ENSP00000344456,ENSP00000361423	ABL1,CTNNB1,JUP								pathway ID	pathway description	observed gene count	false discovery rate	matching proteins in your network (IDs)	matching proteins in your network (labels)
5412	Arrhythmogenic right ventricular cardiomyopathy (ARVC)	2	0.0319	ENSP00000311113,ENSP00000344456	CTNNB1,JUP								GO.0006897	endocytosis	8	1.15e-06	ENSP00000244458,ENSP00000271234,ENSP00000292807,ENSP00000356236,ENSP00000367220,ENSP00000369981,ENSP00000370719,ENSP00000409581	ACTR2,AP2M1,ARRB1,FNBP1L,ITSN1,PACSIN1,SH3GL2,SYT2
													GO.0036465	synaptic vesicle recycling	4	2.38e-06	ENSP00000244458,ENSP00000356236,ENSP00000369981,ENSP00000370719	ITSN1,PACSIN1,SH3GL2,SYT2
17-Fatty Acid Metabolism													GO.0048488	synaptic vesicle endocytosis	4	2.38e-06	ENSP00000244458,ENSP00000356236,ENSP00000369981,ENSP00000370719	ITSN1,PACSIN1,SH3GL2,SYT2
GO Biological Process													GO.0051650	establishment of vesicle localization	6	2.38e-06	ENSP00000244458,ENSP00000261722,ENSP00000271234,ENSP00000356236,ENSP00000369981,ENSP00000370719	AP3B2,FNBP1L,ITSN1,PACSIN1,SH3GL2,SYT2
pathway ID	pathway description	observed gene count	false discovery rate	matching proteins in your network (IDs)	matching proteins in your network (labels)								GO.0048858	cell projection morphogenesis	8	4.19e-06	ENSP00000244458,ENSP00000262752,ENSP00000271234,ENSP00000292807,ENSP00000367220,ENSP00000368884,ENSP00000369981,ENSP00000370719	ACTR2,AP2M1,FNBP1L,ITSN1,PACSIN1,RPS6KA3,RPS6KA6,SH3GL2
GO.0006631	fatty acid metabolic process	7	8.23e-10	ENSP00000258873,ENSP00000278840,ENSP00000281455,ENSP00000333664,ENSP00000349297,ENSP00000359233,ENSP00000360577	ABCD3,ACAA1,ACADVL,ACSBG1,ACSL1,ECHDC2,FADS2
GO.0036109	alpha-linolenic acid metabolic process	3	1.21e-05	ENSP00000278840,ENSP00000281455,ENSP00000333664	ACAA1,ACSL1,FADS2								KEGG
GO.0001676	long-chain fatty acid metabolic process	4	2.32e-05	ENSP00000258873,ENSP00000278840,ENSP00000281455,ENSP00000333664	ACAA1,ACSBG1,ACSL1,FADS2								pathway ID	pathway description	observed gene count	false discovery rate	matching proteins in your network (IDs)	matching proteins in your network (labels)
GO.0000038	very long-chain fatty acid metabolic process	3	0.0001	ENSP00000258873,ENSP00000333664,ENSP00000359233	ABCD3,ACAA1,ACSBG1								4144	Endocytosis	4	0.00144	ENSP00000292807,ENSP00000369981,ENSP00000378735,ENSP00000409581	AP2M1,ARRB1,DNAJC6,SH3GL2
GO.0006635	fatty acid beta-oxidation	3	0.000425	ENSP00000333664,ENSP00000349297,ENSP00000359233	ABCD3,ACAA1,ACADVL
													16-Axon Guidance and Development
KEGG													GO Biological Process
#pathway ID	pathway description	observed gene count	false discovery rate	matching proteins in your network (IDs)	matching proteins in your network (labels)								pathway ID	pathway description	observed gene count	false discovery rate	matching proteins in your network (IDs)	matching proteins in your network (labels)
1212	Fatty acid metabolism	5	3.45e-10	ENSP00000258873,ENSP00000278840,ENSP00000281455,ENSP00000333664,ENSP00000349297	ACAA1,ACADVL,ACSBG1,ACSL1,FADS2								GO.0034765	regulation of ion transmembrane transport	10	2.02e-12	ENSP00000280772,ENSP00000283254,ENSP00000283256,ENSP00000303540,ENSP00000306497,ENSP00000345055,ENSP00000346534,ENSP00000349588,ENSP00000352035,ENSP00000373648	ANK2,ANK3,KCNJ4,KCNQ2,KCNQ3,KCNQ5,SCN1A,SCN2A,SCN3A,SCN8A
71	Fatty acid degradation	4	8.46e-08	ENSP00000258873,ENSP00000281455,ENSP00000333664,ENSP00000349297	ACAA1,ACADVL,ACSBG1,ACSL1								GO.0030001	metal ion transport	9	5.62e-09	ENSP00000283254,ENSP00000283256,ENSP00000303540,ENSP00000306497,ENSP00000345055,ENSP00000346534,ENSP00000349588,ENSP00000352035,ENSP00000373648	ANK2,KCNJ4,KCNQ2,KCNQ3,KCNQ5,SCN1A,SCN2A,SCN3A,SCN8A
3320	PPAR signaling pathway	4	3.71e-07	ENSP00000258873,ENSP00000278840,ENSP00000281455,ENSP00000333664	ACAA1,ACSBG1,ACSL1,FADS2								GO.0015672	monovalent inorganic cation transport	8	3.22e-08	ENSP00000283254,ENSP00000283256,ENSP00000303540,ENSP00000306497,ENSP00000345055,ENSP00000346534,ENSP00000352035,ENSP00000373648	KCNJ4,KCNQ2,KCNQ3,KCNQ5,SCN1A,SCN2A,SCN3A,SCN8A
1040	Biosynthesis of unsaturated fatty acids	2	0.00151	ENSP00000278840,ENSP00000333664	ACAA1,FADS2								GO.0098662	inorganic cation transmembrane transport	8	5.45e-08	ENSP00000283254,ENSP00000283256,ENSP00000303540,ENSP00000306497,ENSP00000345055,ENSP00000346534,ENSP00000352035,ENSP00000373648	KCNJ4,KCNQ2,KCNQ3,KCNQ5,SCN1A,SCN2A,SCN3A,SCN8A
592	alpha-Linolenic acid metabolism	2	0.00158	ENSP00000278840,ENSP00000333664	ACAA1,FADS2								GO.0001508	action potential	5	1.31e-06	ENSP00000280772,ENSP00000283254,ENSP00000283256,ENSP00000303540,ENSP00000349588	ANK2,ANK3,SCN1A,SCN2A,SCN3A
18-Cell-Cell Adhesion													KEGG
GO Biological Process													pathway ID	pathway description	observed gene count	false discovery rate	matching proteins in your network (IDs)	matching proteins in your network (labels)
pathway ID	pathway description	observed gene count	false discovery rate	matching proteins in your network (IDs)	matching proteins in your network (labels)								4725	Cholinergic synapse	4	9.73e-05	ENSP00000306497,ENSP00000345055,ENSP00000352035,ENSP00000373648	KCNJ4,KCNQ2,KCNQ3,KCNQ5
GO.0090557	establishment of endothelial intestinal barrier	2	0.0207	ENSP00000281537,ENSP00000289779	F11R,TJP1
													17-GABAergic Synapse
KEGG													GO Biological Process
pathway ID	pathway description	observed gene count	false discovery rate	matching proteins in your network (IDs)	matching proteins in your network (labels)								pathway ID	pathway description	observed gene count	false discovery rate	matching proteins in your network (IDs)	matching proteins in your network (labels)
4530	Tight junction	6	1.46e-11	ENSP00000281537,ENSP00000289779,ENSP00000320176,ENSP00000364361,ENSP00000370410,ENSP00000420419	F11R,HCLS1,JAM2,MPDZ,TJP1,ZAK								GO.1902476	chloride transmembrane transport	9	3.28e-17	ENSP00000023897,ENSP00000264318,ENSP00000264428,ENSP00000274547,ENSP00000299267,ENSP00000335592,ENSP00000348897,ENSP00000367848,ENSP00000410732	GABRA1,GABRA2,GABRA4,GABRA5,GABRB2,GABRB3,GABRD,GABRG2,GLRB
5120	Epithelial cell signaling in Helicobacter pylori infection	3	8.73e-05	ENSP00000281537,ENSP00000289779,ENSP00000420419	F11R,JAM2,TJP1								GO.0007214	gamma-aminobutyric acid signaling pathway	6	4.78e-13	ENSP00000023897,ENSP00000264318,ENSP00000274547,ENSP00000335592,ENSP00000348897,ENSP00000410732	GABRA1,GABRA2,GABRA4,GABRA5,GABRB2,GABRG2
4670	Leukocyte transendothelial migration	2	0.0428	ENSP00000289779,ENSP00000420419	F11R,JAM2								GO.0071420	cellular response to histamine	4	3.08e-09	ENSP00000023897,ENSP00000274547,ENSP00000299267,ENSP00000410732	GABRA1,GABRB2,GABRB3,GABRG2
4514	Cell adhesion molecules (CAMs)	2	0.0464	ENSP00000289779,ENSP00000420419	F11R,JAM2								GO.0007268	synaptic transmission	8	1.14e-08	ENSP00000023897,ENSP00000253401,ENSP00000264318,ENSP00000274547,ENSP00000335592,ENSP00000348897,ENSP00000367848,ENSP00000410732	ARHGEF9,GABRA1,GABRA2,GABRA4,GABRA5,GABRB2,GABRD,GABRG2
													GO.0051932	synaptic transmission, GABAergic	3	1.66e-06	ENSP00000023897,ENSP00000274547,ENSP00000410732	GABRA1,GABRB2,GABRG2
19-Endoplasmic Reticulum Stress													GO.0007270	neuron-neuron synaptic transmission	4	1.27e-05	ENSP00000023897,ENSP00000264428,ENSP00000274547,ENSP00000410732	GABRA1,GABRB2,GABRG2,GLRB
GO Biological Process
pathway ID	pathway description	observed gene count	false discovery rate	matching proteins in your network (IDs)	matching proteins in your network (labels)								KEGG
GO.0042026	protein refolding	4	3.66e-08	ENSP00000216218,ENSP00000247207,ENSP00000254322,ENSP00000338019	DNAJB1,DNAJB2,HSPA2,ST13								pathway ID	pathway description	observed gene count	false discovery rate	matching proteins in your network (IDs)	matching proteins in your network (labels)
GO.0090084	negative regulation of inclusion body assembly	3	2.71e-06	ENSP00000247207,ENSP00000254322,ENSP00000338019	DNAJB1,DNAJB2,HSPA2								5033	Nicotine addiction	8	1.04e-18	ENSP00000023897,ENSP00000264318,ENSP00000274547,ENSP00000299267,ENSP00000335592,ENSP00000348897,ENSP00000367848,ENSP00000410732	GABRA1,GABRA2,GABRA4,GABRA5,GABRB2,GABRB3,GABRD,GABRG2
GO.0006986	response to unfolded protein	4	4.63e-05	ENSP00000247207,ENSP00000254322,ENSP00000338019,ENSP00000365991	DNAJB1,DNAJB2,DNAJC3,HSPA2								4727	GABAergic synapse	8	3.29e-16	ENSP00000023897,ENSP00000264318,ENSP00000274547,ENSP00000299267,ENSP00000335592,ENSP00000348897,ENSP00000367848,ENSP00000410732	GABRA1,GABRA2,GABRA4,GABRA5,GABRB2,GABRB3,GABRD,GABRG2
GO.0070389	chaperone cofactor-dependent protein refolding	2	0.0011	ENSP00000216218,ENSP00000254322	DNAJB1,ST13								5032	Morphine addiction	8	3.29e-16	ENSP00000023897,ENSP00000264318,ENSP00000274547,ENSP00000299267,ENSP00000335592,ENSP00000348897,ENSP00000367848,ENSP00000410732	GABRA1,GABRA2,GABRA4,GABRA5,GABRB2,GABRB3,GABRD,GABRG2
GO.0032781	positive regulation of ATPase activity	2	0.0496	ENSP00000247207,ENSP00000254322	DNAJB1,HSPA2								4723	Retrograde endocannabinoid signaling	8	5.59e-16	ENSP00000023897,ENSP00000264318,ENSP00000274547,ENSP00000299267,ENSP00000335592,ENSP00000348897,ENSP00000367848,ENSP00000410732	GABRA1,GABRA2,GABRA4,GABRA5,GABRB2,GABRB3,GABRD,GABRG2
													4080	Neuroactive ligand-receptor interaction	9	5.84e-15	ENSP00000023897,ENSP00000264318,ENSP00000264428,ENSP00000274547,ENSP00000299267,ENSP00000335592,ENSP00000348897,ENSP00000367848,ENSP00000410732	GABRA1,GABRA2,GABRA4,GABRA5,GABRB2,GABRB3,GABRD,GABRG2,GLRB
KEGG
pathway ID	pathway description	observed gene count	false discovery rate	matching proteins in your network (IDs)	matching proteins in your network (labels)								18-Potassium Transport
4141	Protein processing in endoplasmic reticulum	4	5.4e-06	ENSP00000247207,ENSP00000254322,ENSP00000338019,ENSP00000365991	DNAJB1,DNAJB2,DNAJC3,HSPA2								GO Biological Process
5164	Influenza A	3	0.000744	ENSP00000247207,ENSP00000254322,ENSP00000365991	DNAJB1,DNAJC3,HSPA2								pathway ID	pathway description	observed gene count	false discovery rate	matching proteins in your network (IDs)	matching proteins in your network (labels)
													GO.0007268	synaptic transmission	9	2.21e-10	ENSP00000262186,ENSP00000287042,ENSP00000295082,ENSP00000297404,ENSP00000314520,ENSP00000328511,ENSP00000360806,ENSP00000367323,ENSP00000371985	KCNA1,KCNA2,KCNA4,KCNAB2,KCNB1,KCNF1,KCNH2,KCNS2,KCNV1
20-NF-Kappa B Signaling													GO.0071805	potassium ion transmembrane transport	7	2.21e-10	ENSP00000262186,ENSP00000287042,ENSP00000295082,ENSP00000297404,ENSP00000328511,ENSP00000367323,ENSP00000371985	KCNA1,KCNA4,KCNAB2,KCNF1,KCNH2,KCNS2,KCNV1
KEGG													GO.0051260	protein homooligomerization	7	8e-09	ENSP00000287042,ENSP00000295082,ENSP00000297404,ENSP00000314520,ENSP00000328511,ENSP00000360806,ENSP00000371985	KCNA1,KCNA2,KCNA4,KCNB1,KCNF1,KCNS2,KCNV1
pathway ID	pathway description	observed gene count	false discovery rate	matching proteins in your network (IDs)	matching proteins in your network (labels)								GO.0034765	regulation of ion transmembrane transport	6	6.6e-06	ENSP00000262186,ENSP00000287042,ENSP00000295082,ENSP00000297404,ENSP00000328511,ENSP00000371985	KCNA1,KCNA4,KCNF1,KCNH2,KCNS2,KCNV1
4064	NF-kappa B signaling pathway	2	0.0227	ENSP00000312455,ENSP00000376500	CFLAR,TRAF3								GO.0070271	protein complex biogenesis	7	2.31e-05	ENSP00000287042,ENSP00000295082,ENSP00000297404,ENSP00000314520,ENSP00000328511,ENSP00000360806,ENSP00000371985	KCNA1,KCNA2,KCNA4,KCNB1,KCNF1,KCNS2,KCNV1
4668	TNF signaling pathway	2	0.0227	ENSP00000312455,ENSP00000376500	CFLAR,TRAF3
													19-Regulation of Potassium
													GO Biological Process
													pathway ID	pathway description	observed gene count	false discovery rate	matching proteins in your network (IDs)	matching proteins in your network (labels)
													GO.0043266	regulation of potassium ion transport	5	2.27e-06	ENSP00000265969,ENSP00000337459,ENSP00000371587,ENSP00000395323,ENSP00000420040	KCNC1,KCNIP1,KCNIP2,KCNIP4,NOS1
													GO.1904062	regulation of cation transmembrane transport	5	4.93e-05	ENSP00000265969,ENSP00000337459,ENSP00000371587,ENSP00000395323,ENSP00000420040	KCNC1,KCNIP1,KCNIP2,KCNIP4,NOS1
													GO.1901379	regulation of potassium ion transmembrane transport	4	5.16e-05	ENSP00000265969,ENSP00000371587,ENSP00000395323,ENSP00000420040	KCNC1,KCNIP1,KCNIP2,KCNIP4
													GO.0071805	potassium ion transmembrane transport	4	0.000752	ENSP00000265969,ENSP00000371587,ENSP00000395323,ENSP00000420040	KCNC1,KCNIP1,KCNIP2,KCNIP4
													GO.0034765	regulation of ion transmembrane transport	5	0.00078	ENSP00000337459,ENSP00000361475,ENSP00000371587,ENSP00000395323,ENSP00000420040	KCNIP1,KCNIP2,KCNIP4,NCS1,NOS1
													20-Cytokine Signaling and Protein Transport
													GO Biological Process
													pathway ID	pathway description	observed gene count	false discovery rate	matching proteins in your network (IDs)	matching proteins in your network (labels)
													GO.0019221	cytokine-mediated signaling pathway	4	0.0441	ENSP00000246062,ENSP00000283195,ENSP00000393324,ENSP00000425561	EIF4E,EIF4E3,MKKS,RANBP2
													21-G2/M Cell Cycle Transition
													GO Biological Process
													pathway ID	pathway description	observed gene count	false discovery rate	matching proteins in your network (IDs)	matching proteins in your network (labels)
													GO.0000086	G2/M transition of mitotic cell cycle	4	0.000499	ENSP00000248437,ENSP00000259632,ENSP00000352572,ENSP00000358921	ACTR1A,DCTN3,PCNT,TUBA4A
													GO.0007017	microtubule-based process	5	0.000507	ENSP00000248437,ENSP00000254286,ENSP00000259632,ENSP00000262891,ENSP00000352572	ACTR10,DCTN3,MARK4,PCNT,TUBA4A

## Sheet: Neuronal mHTT Response Clusters
Network clustering for network of conserved HD DEGs in response to mHTT toxicity in neurons
Upregulated					Downregulated
Cluster Number	Cluster Name	Human Genes	Specific		Cluster Number	Cluster Name	Human Genes	Specific
1	TGF-Beta and Hippo Signaling Pathways	RUNX2, SMAD5, TGIF1, SMAD9, SMAD2, BMP7, YAP1, UBXN7, CTDSP2, SMAD1	Yes		1	Nucleotide Metabolism	NME1, POLR2E, NME7, GUCY1A2, GUCY1A3, GUCY1B3, GCH1, POLR3K, PDE2A, PDE1B, PDE10A, ENTPD6, AMPD2	Yes
2	Cell Signaling/Axon Guidance	PLXNB1, PLXNB2, RPS27, RASA3, SEMA4C, SEC61A1, MPDZ, PLPP3, RAPH1	Yes		2	Glycolysis	GAPDH, ENO2, FKBP1B, FKBP1A, ENO1, PFKM, TAGLN3, INHBA	Yes
3	Cellular Localization	KIF13B, KLC1, KIF1C, KIF9, KDELR2, ANKFY1, GEM	Yes		3	Cellular Respiration	VDAC1, COX4I1, DUFS4, QCRB, TP5L, DAC3, DUFA5, DUFB10, DUFAF5	Yes
4	Cell Division	TNC, SEPT2, SEMA4D, SEPT7, SEPT4, SEPT10, SEPT11	Yes		4	Tricarboxylic Acid Cycle	ACLY, ACO2, IDH3G, IDH3A, HMGCLL1, NIT2, MTHFD1, ME3, EIF5A2	Yes
5	Oligodendroctye Differentiation	OLIG2, SFRP2, FZD5, MLL3, FZD6, NKX2-2, PAX6	Yes		5	Cell-Cell Adhesion	CDH6, CDH7, CDH8, CDH12, CDH18	Yes
6	Vesicle Fusion and Exocytosis	PXN, VAMP5, SMAD9, RAB13, CETN2, LNPEP, ANXA3	Yes		6	Glycosaminoglycan Synthesis	HS2ST1, NDST3, HS6ST3, HS6ST2	Yes
7	Notch Signaling	NOTCH3, HES1, JAG1, NOTCH1, HDAC4, HES6	Yes		7	Synaptic Transmssion/Cell Signaling	ADCY3, ADCY5, ADCY9, APP, GNB1, GNB5, GNG3, GNG4, GNG7, ADCY1, GNAO1, GRM3, PRKCG, GABBR2, DRD2, ADRA2C, NPY1R, NPY5R, HRH3, KALRN, DRD1, ADRB1 HTR2C, AKT3, PDE4B, KCNJ9, KISS1R, CAMK4, PDE7B, ETNK1,RGS7BP	No
8	Regulation of Secretions	PRKG1, CD22, ATP1A2, ATP2B4, BCL6, ABCA2	Yes		8	Synaptic Transmission/Calcium Transport	PRKACB, GRIN2B, CAMK2B, ACTN2, GRIN2A, CAMK2A, GRIN1, CACNG3, CACNG2, CACNG8, GRIA1, GRIA2, GRIA3, CACNG4, LGI1, SIPA1L1, RAP1GAP2	No
9	Neuronal Ion Channel Clustering	PTPRC, NET1, SPAG9, CNTN2, USH1C	Yes		9	MAPK1 Signaling	MAPK1, HRAS, PRKCE, PRKCD, RPS6KA3, RPS6KA6, ELK1, PTPN7, PTPRR, PTPN5, DUSP6, DUSP8, EGR1, PRKCH	No
10	Extracellular Matrix Organization and Signaling	ITGB5, ITGB4, ITGB8, ITGA2, ITGA6, PAK2, COL9A2, FLNA, ITGA7, COL6A1, COL4A2, COL4A5, ITGB2, LAMA2, P4HA1, COL16A1, LAMA1, MYL6, COL27A1, DMD, PTPRZ1. MYLK, PLXND1, SLC22A5, LAP3, MTHFD2,MYBPC1, P4HA1, TNC	No		10	Phospholipid Metabolism	GPD1L, LPCAT4, DGAT2, LPL, PLPPR3, DGKZ, DGKE, DGKI, LPIN2, PLD3, SELENOI, GPAT2, PLPPR4, PLPPR2, LPGAT1	No
11	Receptor Mediated Cell Signaling	PIK3CD, FYN, IGF1R, LYN, GAB1, PIK3CD,TIE1, INSR, EFNA1, FGFR2, FGFR3, ANGPT1, PDGFA, PRKX, GAB2, CSF1R, FGF1, IL6ST, IRS2, SLA, AXL, CAPN2, ATP6V0E1, LIFR, OSMR, PGF, PHLPP1, YES1	No		11	GTPase Signal Transduction	CDC42, RHOBTB2, BCR, ARHGDIA, ARHGDIG, ARHGEF17, CHN1, MAPK6, ARHGAP32, DLC1, NGEF, ARHGEF4, ARHGAP33, MAP3K9, TNK2, RASD2	No
12	Endocytosis	ITSN1, LDLR, PIK3C2A, HIP1R, LRP2, SNX18, BIN1, ITSN2, SNX9, STON1, PACSIN2, RHOBTB3, INPPL1, STAG2, VAMP5, COBLL1, GNS, TF, USP1, VAMP3	No		12	Protein Ubiquitination	LMO7, KLHL13, RNF6, UBE2B, PJA2, WWP1, NEDD4L, RNF130, PJA1, LNX1, TRIM9, FBXL16	No
13	Inflammation/Regulation of Transcription	JUN, CREB1, SP1, SP3, FAT1, TLR5, ETS1, CAMK2G, SQSTM1,DUSP1, TRIP6, ATF7, ATF3, GTF3A, FKBP5, NR3C1, RELA	No		13	Regulation of Potassium	NOS1, KCNC1, KCNIP2, KCNIP1, KCNIP4, HPCA, VSNL1, NCS1, CABP1, GUCA1A, HPCAL4, CALN1	No
14	Wound Healing and Inflammation	VWF, TGFB1, IQGAP1, TIMP3, SERPINA5, SERPINA1, APBB1IP, INHBB, KSR1, TIMP1, LTBP1, LTBP3, CD63, KLF10, SERPING1 TGFB2	No		14	Nervous System Development	CALM1, ACTB, ACTN1, DAPK1, ATP2A2, GAP43, ITPKA, MAP2, NRGN, CAMK1, CAMK1D, CAMK1G, PNCK	No
15	mRNA Processing	ELAVL1, SYNCRIP, HNRNPA1, RALY, HNRNPA3, HNRNPA2B1, HNRNPH3, RBM38, DDX17, HIPK3, CLK1, LUC7L3, SRSF1	No		15	GABAergic Synapse	ARHGEF9, GABRG2, GABRB2, GABRB3, GABRA2, GABRA1, GABRA5, GLRB, GABRA4, GABRD	No
16	Endoplasmic Reticulum Stress	HSPA2, STAG2, DNAJB1, RNF130, NFASC, DNAJC3, SCRIB, AHSA2, DNAJB2, MARCH3, SSH2, SYNCRIP	No		16	Synaptic Reuptake	ARRB1, ACTR2, ITSN1, SH3GL2, FNBP1L, RAB5A, PACSIN1, SYT2, RTN1, INF2	No
17	GTPase Signaling/Actin Cytoskeleton	RHOC, ARHGDIB, DAAM1, ARHGAP18, ARHGAP29, RGS1, DAAM2, FMNL2, NEO1, PIP4K2A, RHOBTB3	No		17	Potassium Transport	KCNAB2, KCNA1, KCNB1, CNTNAP1, KCNA4, KCNA2, KCNF1, KCNS2, KCNV1	No
18	Cell Signaling	CTNNB1, ABL1, GNA13, GNA12, JUP, ENAH, ERBIN, SP3, PKN2, RALY	No		18	Axon Guidance and Development	KCNQ3, SPTBN2, KCNQ2, KCNJ4, SPTB, KCNQ5, ANK2, ANK3	No
19	G-Protein Couple Receptor Signaling	RELA, GNAI3, CXCR4,AGT, ANXA1, GNAS, ACKR3, KCNJ3	No		19	Neurotransmitter Transport	RIMS1, GAD1, GLUL, CALB1, DNAJC5, GAD2, ARG2, PPFIA4, LIN7B, SRM, ELOVL4, BSN	No
20	NF-Kappa B Singaling	BCL2, BIRC2, CFLAR, MAP3K20, CTSH, BOK, MCL1, TRA2A	No		20	G2/M Cell Cycle Transition	PAFAH1B1, ACTR1A, PCNT, MARK4, ACTR10	No
21	Cell-Cell Adhesion	PRKCA, YBX3, F11R, TJP1, JAM2, MPDZ	No		21	Cytokine Signaling and Protein Transport	BAG4, HSPA13, HSPA12A, LRRK2, RANBP2, DNAJB14, STYK1	No
22	Fatty Acid Metabolism	ACSL1, ACAA1, ACSBG1, ACADVL, ABCD3, ECHDC2	No
23	Lipid Transport and Storage	CD36, RXRA, ABCA1, SYTL4, ANGPTL4, NR2F1, PPARA	No

## Sheet: Neuronal mHTT Response Annot.
Upregulated															Downregulated
1-TGF-Beta and Hippo Signaling															1-Nucleotide Metabolism
GO Biological Process															GO Biological Process
pathway ID	pathway description	observed gene count	false discovery rate	matching proteins in your network (IDs)	matching proteins in your network (labels)										pathway ID	pathway description	observed gene count	false discovery rate	matching proteins in your network (IDs)	matching proteins in your network (labels)
GO.0001657	ureteric bud development	5	5.94e-07	ENSP00000262160,ENSP00000305769,ENSP00000369154,ENSP00000379204,ENSP00000441954	BMP7,SMAD1,SMAD2,SMAD5,SMAD9										GO.0009187	cyclic nucleotide metabolic process	7	1.17e-11	ENSP00000243052,ENSP00000256578,ENSP00000264424,ENSP00000296518,ENSP00000334910,ENSP00000431245,ENSP00000438284	AMPD2,GUCY1A2,GUCY1A3,GUCY1B3,PDE10A,PDE1B,PDE2A
GO.0002051	osteoblast fate commitment	3	5.94e-07	ENSP00000305769,ENSP00000360493,ENSP00000441954	RUNX2,SMAD1,SMAD5										GO.0046068	cGMP metabolic process	6	1.17e-11	ENSP00000243052,ENSP00000264424,ENSP00000296518,ENSP00000334910,ENSP00000431245,ENSP00000438284	GUCY1A2,GUCY1A3,GUCY1B3,PDE10A,PDE1B,PDE2A
GO.0007178	transmembrane receptor protein serine/threonine kinase signaling pathway	6	5.94e-07	ENSP00000262160,ENSP00000305769,ENSP00000360493,ENSP00000369154,ENSP00000379204,ENSP00000441954	BMP7,RUNX2,SMAD1,SMAD2,SMAD5,SMAD9										GO.0009150	purine ribonucleotide metabolic process	8	6.86e-09	ENSP00000013034,ENSP00000243052,ENSP00000264424,ENSP00000296518,ENSP00000334910,ENSP00000356785,ENSP00000431245,ENSP00000438284	GUCY1A2,GUCY1A3,GUCY1B3,NME1,NME7,PDE10A,PDE1B,PDE2A
GO.0030509	BMP signaling pathway	5	5.94e-07	ENSP00000305769,ENSP00000360493,ENSP00000369154,ENSP00000379204,ENSP00000441954	BMP7,RUNX2,SMAD1,SMAD5,SMAD9										GO.0009152	purine ribonucleotide biosynthetic process	6	7.49e-08	ENSP00000013034,ENSP00000256578,ENSP00000264424,ENSP00000296518,ENSP00000356785,ENSP00000431245	AMPD2,GUCY1A2,GUCY1A3,GUCY1B3,NME1,NME7
GO.0071773	cellular response to BMP stimulus	5	5.94e-07	ENSP00000305769,ENSP00000360493,ENSP00000369154,ENSP00000379204,ENSP00000441954	BMP7,RUNX2,SMAD1,SMAD5,SMAD9										GO.0019637	organophosphate metabolic process	9	7.49e-08	ENSP00000013034,ENSP00000243052,ENSP00000264424,ENSP00000296518,ENSP00000334910,ENSP00000356785,ENSP00000378890,ENSP00000431245,ENSP00000438284	GCH1,GUCY1A2,GUCY1A3,GUCY1B3,NME1,NME7,PDE10A,PDE1B,PDE2A
KEGG															KEGG
pathway ID	pathway description	observed gene count	false discovery rate	matching proteins in your network (IDs)	matching proteins in your network (labels)										pathway ID	pathway description	observed gene count	false discovery rate	matching proteins in your network (IDs)	matching proteins in your network (labels)
4350	TGF-beta signaling pathway	5	4.72e-08	ENSP00000262160,ENSP00000305769,ENSP00000369154,ENSP00000379204,ENSP00000441954	BMP7,SMAD1,SMAD2,SMAD5,SMAD9										230	Purine metabolism	12	1.61e-22	ENSP00000013034,ENSP00000215587,ENSP00000243052,ENSP00000256578,ENSP00000264424,ENSP00000293860,ENSP00000296518,ENSP00000334910,ENSP00000356785,ENSP00000365840,ENSP00000431245,ENSP00000438284	AMPD2,ENTPD6,GUCY1A2,GUCY1A3,GUCY1B3,NME1,NME7,PDE10A,PDE1B,PDE2A,POLR2E,POLR3K
4390	Hippo signaling pathway	4	7.26e-05	ENSP00000262160,ENSP00000282441,ENSP00000305769,ENSP00000379204	BMP7,SMAD1,SMAD2,YAP1										240	Pyrimidine metabolism	5	4.52e-07	ENSP00000013034,ENSP00000215587,ENSP00000293860,ENSP00000356785,ENSP00000365840	ENTPD6,NME1,NME7,POLR2E,POLR3K
															4022	cGMP-PKG signaling pathway	4	0.000216	ENSP00000264424,ENSP00000296518,ENSP00000334910,ENSP00000431245	GUCY1A2,GUCY1A3,GUCY1B3,PDE2A
2-Cell Signaling/Axon Guidance															4730	Long-term depression	3	0.000435	ENSP00000264424,ENSP00000296518,ENSP00000431245	GUCY1A2,GUCY1A3,GUCY1B3
GO Biological Process															4540	Gap junction	3	0.000818	ENSP00000264424,ENSP00000296518,ENSP00000431245	GUCY1A2,GUCY1A3,GUCY1B3
pathway ID	pathway description	observed gene count	false discovery rate	matching proteins in your network (IDs)	matching proteins in your network (labels)
GO.0071526	semaphorin-plexin signaling pathway	5	9.01e-10	ENSP00000296440,ENSP00000306844,ENSP00000348822,ENSP00000352288,ENSP00000442736	PLXNB1,PLXNB2,PLXNB3,SEMA4C,SEMA4D										2-Glycolysis
GO.0043087	regulation of GTPase activity	6	0.000114	ENSP00000262940,ENSP00000296440,ENSP00000335029,ENSP00000348822,ENSP00000352288,ENSP00000442736	PLXNB1,PLXNB2,PLXNB3,RASA3,RASA4,SEMA4D										GO Biological Process
GO.1900220	semaphorin-plexin signaling pathway involved in bone trabecula morphogenesis	2	0.000791	ENSP00000296440,ENSP00000348822	PLXNB1,SEMA4D										pathway ID	pathway description	observed gene count	false discovery rate	matching proteins in your network (IDs)	matching proteins in your network (labels)
GO.0050772	positive regulation of axonogenesis	3	0.00636	ENSP00000296440,ENSP00000348822,ENSP00000352288	PLXNB1,PLXNB2,SEMA4D										GO.0061621	canonical glycolysis	4	4.63e-07	ENSP00000229239,ENSP00000229277,ENSP00000234590,ENSP00000345771	ENO1,ENO2,GAPDH,PFKM
GO.1902531	regulation of intracellular signal transduction	6	0.00916	ENSP00000246792,ENSP00000262940,ENSP00000296440,ENSP00000306844,ENSP00000335029,ENSP00000348822	PLXNB1,RASA3,RASA4,RRAS,SEMA4C,SEMA4D										GO.0032513	negative regulation of protein phosphatase type 2B activity	2	6.84e-05	ENSP00000370373,ENSP00000371138	FKBP1A,FKBP1B
															GO.0006094	gluconeogenesis	3	0.000189	ENSP00000229239,ENSP00000229277,ENSP00000234590	ENO1,ENO2,GAPDH
KEGG															GO.0022417	protein maturation by protein folding	2	0.00121	ENSP00000370373,ENSP00000371138	FKBP1A,FKBP1B
pathway ID	pathway description	observed gene count	false discovery rate	matching proteins in your network (IDs)	matching proteins in your network (labels)										GO.0010605	negative regulation of macromolecule metabolic process	6	0.00462	ENSP00000229239,ENSP00000234590,ENSP00000242208,ENSP00000273368,ENSP00000370373,ENSP00000371138	ENO1,FKBP1A,FKBP1B,GAPDH,INHBA,TAGLN3
4360	Axon guidance	5	2.57e-07	ENSP00000296440,ENSP00000306844,ENSP00000348822,ENSP00000352288,ENSP00000442736	PLXNB1,PLXNB2,PLXNB3,SEMA4C,SEMA4D
4014	Ras signaling pathway	4	0.000222	ENSP00000246792,ENSP00000262940,ENSP00000289104,ENSP00000335029	MRAS,RASA3,RASA4,RRAS										KEGG
															pathway ID	pathway description	observed gene count	false discovery rate	matching proteins in your network (IDs)	matching proteins in your network (labels)
3-Cellular Localization															10	Glycolysis / Gluconeogenesis	3	0.000305	ENSP00000229239,ENSP00000229277,ENSP00000345771	ENO2,GAPDH,PFKM
GO Biological Process															1230	Biosynthesis of amino acids	3	0.000305	ENSP00000229239,ENSP00000229277,ENSP00000345771	ENO2,GAPDH,PFKM
pathway ID	pathway description	observed gene count	false discovery rate	matching proteins in your network (IDs)	matching proteins in your network (labels)										1200	Carbon metabolism	3	0.000633	ENSP00000229239,ENSP00000229277,ENSP00000345771	ENO2,GAPDH,PFKM
GO.0051649	establishment of localization in cell	6	0.0202	ENSP00000258739,ENSP00000297596,ENSP00000320821,ENSP00000414982,ENSP00000427900,ENSP00000459775	ANKFY1,GEM,KDELR2,KIF13B,KIF1C,KLC1										4066	HIF-1 signaling pathway	2	0.0495	ENSP00000229239,ENSP00000229277	ENO2,GAPDH
4-Cell Division															3-Cellular Respiration
GO Biological Process															GO Biological Process
pathway ID	pathway description	observed gene count	false discovery rate	matching proteins in your network (IDs)	matching proteins in your network (labels)										pathway ID	pathway description	observed gene count	false discovery rate	matching proteins in your network (IDs)	matching proteins in your network (labels)
GO.0051301	cell division	5	0.00139	ENSP00000264893,ENSP00000321674,ENSP00000353157,ENSP00000380824,ENSP00000381992	SEPT10,SEPT11,SEPT2,SEPT4,SEPT7										GO.0022904	respiratory electron transport chain	5	6.7e-06	ENSP00000253452,ENSP00000268668,ENSP00000296684,ENSP00000300688,ENSP00000347988	ATP5L,COX4I1,NDUFA5,NDUFB10,NDUFS4
															GO.0045333	cellular respiration	5	2.05e-05	ENSP00000253452,ENSP00000268668,ENSP00000296684,ENSP00000300688,ENSP00000347988	ATP5L,COX4I1,NDUFA5,NDUFB10,NDUFS4
KEGG															GO.0042775	mitochondrial ATP synthesis coupled electron transport	4	2.46e-05	ENSP00000268668,ENSP00000287022,ENSP00000296684,ENSP00000347988	NDUFA5,NDUFB10,NDUFS4,UQCRB
pathway ID	pathway description	observed gene count	false discovery rate	matching proteins in your network (IDs)	matching proteins in your network (labels)										GO.0046034	ATP metabolic process	4	0.000759	ENSP00000268668,ENSP00000296684,ENSP00000300688,ENSP00000347988	ATP5L,NDUFA5,NDUFB10,NDUFS4
5100	Bacterial invasion of epithelial cells	3	0.000433	ENSP00000264893,ENSP00000353157,ENSP00000367991	SEPT11,SEPT2,SEPT8										GO.0006120	mitochondrial electron transport, NADH to ubiquinone	3	0.000857	ENSP00000268668,ENSP00000296684,ENSP00000347988	NDUFA5,NDUFB10,NDUFS4
5-Oligodendrocyte Differentiation															KEGG
GO Biological Process															pathway ID	pathway description	observed gene count	false discovery rate	matching proteins in your network (IDs)	matching proteins in your network (labels)
pathway ID	pathway description	observed gene count	false discovery rate	matching proteins in your network (IDs)	matching proteins in your network (labels)										5012	Parkinson s disease	7	5.86e-12	ENSP00000253452,ENSP00000265333,ENSP00000268668,ENSP00000287022,ENSP00000296684,ENSP00000347988,ENSP00000428845	COX4I1,NDUFA5,NDUFB10,NDUFS4,UQCRB,VDAC1,VDAC3
GO.0021778	oligodendrocyte cell fate specification	3	1.13e-06	ENSP00000331040,ENSP00000366347,ENSP00000368401	NKX2-2,OLIG2,PAX6										5016	Huntington s disease	7	1.92e-11	ENSP00000253452,ENSP00000265333,ENSP00000268668,ENSP00000287022,ENSP00000296684,ENSP00000347988,ENSP00000428845	COX4I1,NDUFA5,NDUFB10,NDUFS4,UQCRB,VDAC1,VDAC3
GO.0021779	oligodendrocyte cell fate commitment	3	1.13e-06	ENSP00000331040,ENSP00000366347,ENSP00000368401	NKX2-2,OLIG2,PAX6										190	Oxidative phosphorylation	6	4.64e-10	ENSP00000253452,ENSP00000268668,ENSP00000287022,ENSP00000296684,ENSP00000300688,ENSP00000347988	ATP5L,COX4I1,NDUFA5,NDUFB10,NDUFS4,UQCRB
GO.0021522	spinal cord motor neuron differentiation	3	0.000441	ENSP00000331040,ENSP00000366347,ENSP00000368401	NKX2-2,OLIG2,PAX6										4932	Non-alcoholic fatty liver disease (NAFLD)	5	1.58e-07	ENSP00000253452,ENSP00000268668,ENSP00000287022,ENSP00000296684,ENSP00000347988	COX4I1,NDUFA5,NDUFB10,NDUFS4,UQCRB
GO.0021529	spinal cord oligodendrocyte cell differentiation	2	0.000593	ENSP00000331040,ENSP00000366347	NKX2-2,OLIG2										5010	Alzheimer s disease	5	2.2e-07	ENSP00000253452,ENSP00000268668,ENSP00000287022,ENSP00000296684,ENSP00000347988	COX4I1,NDUFA5,NDUFB10,NDUFS4,UQCRB
GO.0021530	spinal cord oligodendrocyte cell fate specification	2	0.000593	ENSP00000331040,ENSP00000366347	NKX2-2,OLIG2
															4-Tricarboxylic Acid Cycle
KEGG															GO Biological Process
pathway ID	pathway description	observed gene count	false discovery rate	matching proteins in your network (IDs)	matching proteins in your network (labels)										pathway ID	pathway description	observed gene count	false discovery rate	matching proteins in your network (IDs)	matching proteins in your network (labels)
4310	Wnt signaling pathway	3	0.00277	ENSP00000274063,ENSP00000351605,ENSP00000354607	FZD5,FZD6,SFRP2										GO.0006101	citrate metabolic process	4	8.52e-06	ENSP00000216254,ENSP00000217901,ENSP00000253792,ENSP00000299518	ACLY,ACO2,IDH3A,IDH3G
4950	Maturity onset diabetes of the young	2	0.0043	ENSP00000366347,ENSP00000368401	NKX2-2,PAX6										GO.0009060	aerobic respiration	4	2.95e-05	ENSP00000216254,ENSP00000217901,ENSP00000299518,ENSP00000352657	ACO2,IDH3A,IDH3G,ME3
5217	Basal cell carcinoma	2	0.0141	ENSP00000351605,ENSP00000354607	FZD5,FZD6										GO.0043648	dicarboxylic acid metabolic process	4	0.00013	ENSP00000217901,ENSP00000352657,ENSP00000377696,ENSP00000450560	IDH3G,ME3,MTHFD1,NIT2
4916	Melanogenesis	2	0.0323	ENSP00000351605,ENSP00000354607	FZD5,FZD6										GO.0015980	energy derivation by oxidation of organic compounds	5	0.000346	ENSP00000216254,ENSP00000217901,ENSP00000253792,ENSP00000299518,ENSP00000352657	ACLY,ACO2,IDH3A,IDH3G,ME3
															GO.0006099	tricarboxylic acid cycle	3	0.000529	ENSP00000216254,ENSP00000217901,ENSP00000299518	ACO2,IDH3A,IDH3G
6-Vesicle Fusion and Exocytosis
GO Biological Process															KEGG
pathway ID	pathway description	observed gene count	false discovery rate	matching proteins in your network (IDs)	matching proteins in your network (labels)										pathway ID	pathway description	observed gene count	false discovery rate	matching proteins in your network (IDs)	matching proteins in your network (labels)
GO.0006906	vesicle fusion	3	0.00393	ENSP00000249647,ENSP00000300935,ENSP00000305647	RAB8A,SNAP23,VAMP5										20	Citrate cycle (TCA cycle)	4	1.01e-07	ENSP00000216254,ENSP00000217901,ENSP00000253792,ENSP00000299518	ACLY,ACO2,IDH3A,IDH3G
GO.0006887	exocytosis	4	0.00458	ENSP00000249647,ENSP00000264908,ENSP00000300935,ENSP00000305647	ANXA3,RAB8A,SNAP23,VAMP5										1210	2-Oxocarboxylic acid metabolism	3	5.73e-06	ENSP00000216254,ENSP00000217901,ENSP00000299518	ACO2,IDH3A,IDH3G
GO.0072659	protein localization to plasma membrane	3	0.0145	ENSP00000300935,ENSP00000305647,ENSP00000357564	RAB13,RAB8A,VAMP5										1200	Carbon metabolism	4	6.89e-06	ENSP00000216254,ENSP00000217901,ENSP00000299518,ENSP00000352657	ACO2,IDH3A,IDH3G,ME3
GO.0043299	leukocyte degranulation	2	0.0372	ENSP00000249647,ENSP00000264908	ANXA3,SNAP23										1100	Metabolic pathways	6	0.000171	ENSP00000216254,ENSP00000217901,ENSP00000253792,ENSP00000299518,ENSP00000352657,ENSP00000450560	ACLY,ACO2,IDH3A,IDH3G,ME3,MTHFD1
GO.0048193	Golgi vesicle transport	3	0.0444	ENSP00000249647,ENSP00000300935,ENSP00000305647	RAB8A,SNAP23,VAMP5										1230	Biosynthesis of amino acids	3	0.000182	ENSP00000216254,ENSP00000217901,ENSP00000299518	ACO2,IDH3A,IDH3G
KEGG															5-Cell-Cell Adhesion
pathway ID	pathway description	observed gene count	false discovery rate	matching proteins in your network (IDs)	matching proteins in your network (labels)										GO Biological Process
4130	SNARE interactions in vesicular transport	2	0.0142	ENSP00000249647,ENSP00000305647	SNAP23,VAMP5										pathway ID	pathway description	observed gene count	false discovery rate	matching proteins in your network (IDs)	matching proteins in your network (labels)
															GO.0034332	adherens junction organization	5	5.59e-09	ENSP00000265071,ENSP00000274170,ENSP00000319166,ENSP00000371689,ENSP00000462701	CDH12,CDH18,CDH6,CDH7,CDH8
7-Notch Signaling															GO.0007156	homophilic cell adhesion via plasma membrane adhesion molecules	5	8.07e-08	ENSP00000265071,ENSP00000274170,ENSP00000319166,ENSP00000371689,ENSP00000462701	CDH12,CDH18,CDH6,CDH7,CDH8
GO Biological Process															GO.0034329	cell junction assembly	5	8.07e-08	ENSP00000265071,ENSP00000274170,ENSP00000319166,ENSP00000371689,ENSP00000462701	CDH12,CDH18,CDH6,CDH7,CDH8
pathway ID	pathway description	observed gene count	false discovery rate	matching proteins in your network (IDs)	matching proteins in your network (labels)										GO.0098609	cell-cell adhesion	4	0.0043	ENSP00000265071,ENSP00000274170,ENSP00000371689,ENSP00000462701	CDH12,CDH18,CDH6,CDH8
GO.0007220	Notch receptor processing	3	4.28e-05	ENSP00000254958,ENSP00000263388,ENSP00000277541	JAG1,NOTCH1,NOTCH3										GO.0044085	cellular component biogenesis	5	0.00773	ENSP00000265071,ENSP00000274170,ENSP00000319166,ENSP00000371689,ENSP00000462701	CDH12,CDH18,CDH6,CDH7,CDH8
GO.0072006	nephron development	4	4.28e-05	ENSP00000232424,ENSP00000254958,ENSP00000263388,ENSP00000277541	HES1,JAG1,NOTCH1,NOTCH3
GO.0072012	glomerulus vasculature development	3	4.28e-05	ENSP00000232424,ENSP00000263388,ENSP00000277541	HES1,NOTCH1,NOTCH3										6-Glycosaminoglycan Synthesis
GO.0097150	neuronal stem cell population maintenance	3	4.28e-05	ENSP00000232424,ENSP00000254958,ENSP00000277541	HES1,JAG1,NOTCH1										GO Biological Process
GO.0007219	Notch signaling pathway	4	4.7e-05	ENSP00000232424,ENSP00000254958,ENSP00000263388,ENSP00000277541	HES1,JAG1,NOTCH1,NOTCH3										pathway ID	pathway description	observed gene count	false discovery rate	matching proteins in your network (IDs)	matching proteins in your network (labels)
															GO.0006024	glycosaminoglycan biosynthetic process	3	0.00341	ENSP00000296499,ENSP00000359579,ENSP00000429473	HS6ST2,KIAA0448,NDST3
KEGG															GO.0015012	heparan sulfate proteoglycan biosynthetic process	2	0.0182	ENSP00000296499,ENSP00000429473	HS6ST2,NDST3
pathway ID	pathway description	observed gene count	false discovery rate	matching proteins in your network (IDs)	matching proteins in your network (labels)
4330	Notch signaling pathway	4	1.05e-07	ENSP00000232424,ENSP00000254958,ENSP00000263388,ENSP00000277541	HES1,JAG1,NOTCH1,NOTCH3										KEGG
5206	MicroRNAs in cancer	3	0.000945	ENSP00000263388,ENSP00000264606,ENSP00000277541	HDAC4,NOTCH1,NOTCH3										pathway ID	pathway description	observed gene count	false discovery rate	matching proteins in your network (IDs)	matching proteins in your network (labels)
4320	Dorso-ventral axis formation	2	0.00158	ENSP00000263388,ENSP00000277541	NOTCH1,NOTCH3										534	Glycosaminoglycan biosynthesis - heparan sulfate / heparin	2	0.00227	ENSP00000296499,ENSP00000429473	HS6ST2,NDST3
4919	Thyroid hormone signaling pathway	2	0.0332	ENSP00000263388,ENSP00000277541	NOTCH1,NOTCH3
															7-Synaptic Transmission/Cell Signaling
8-Regulation of Secretions															GO Biological Process
KEGG															pathway ID	pathway description	observed gene count	false discovery rate	matching proteins in your network (IDs)	matching proteins in your network (labels)
pathway ID	pathway description	observed gene count	false discovery rate	matching proteins in your network (IDs)	matching proteins in your network (labels)										GO.0007268	synaptic transmission	18	4.33e-17	ENSP00000234371,ENSP00000259455,ENSP00000260600,ENSP00000263431,ENSP00000276198,ENSP00000294016,ENSP00000294117,ENSP00000297323,ENSP00000310661,ENSP00000327652,ENSP00000342560,ENSP00000354859,ENSP00000355316,ENSP00000355556,ENSP00000357067,ENSP00000367869,ENSP00000371594,ENSP00000419361	ADCY1,ADCY3,ADCY5,ADCY9,DRD1,DRD2,GABBR2,GNB1,GNG3,GNG4,GNG7,GRM3,HRH3,HTR2C,KCNJ9,KISS1R,PDE7B,PRKCG
4970	Salivary secretion	3	0.000353	ENSP00000350310,ENSP00000354490,ENSP00000363092	ATP1A2,ATP2B4,PRKG1										GO.0007267	cell-cell signaling	20	8.05e-17	ENSP00000234371,ENSP00000259455,ENSP00000260600,ENSP00000263431,ENSP00000276198,ENSP00000294016,ENSP00000294117,ENSP00000297323,ENSP00000310661,ENSP00000327652,ENSP00000342560,ENSP00000354859,ENSP00000355316,ENSP00000355556,ENSP00000357067,ENSP00000358301,ENSP00000367869,ENSP00000371594,ENSP00000386069,ENSP00000419361	ADCY1,ADCY3,ADCY5,ADCY9,ADRA2C,ADRB1,DRD1,DRD2,GABBR2,GNB1,GNG3,GNG4,GNG7,GRM3,HRH3,HTR2C,KCNJ9,KISS1R,PDE7B,PRKCG
4022	cGMP-PKG signaling pathway	3	0.00125	ENSP00000350310,ENSP00000354490,ENSP00000363092	ATP1A2,ATP2B4,PRKG1										GO.0007187	G-protein coupled receptor signaling pathway, coupled to cyclic nucleotide second messenger	12	2.12e-14	ENSP00000260600,ENSP00000262493,ENSP00000294016,ENSP00000297323,ENSP00000327652,ENSP00000342560,ENSP00000354652,ENSP00000354859,ENSP00000355316,ENSP00000358301,ENSP00000367869,ENSP00000386069	ADCY1,ADCY3,ADCY9,ADRA2C,ADRB1,DRD1,DRD2,GNAO1,GNB1,GRM3,HRH3,NPY1R
4972	Pancreatic secretion	2	0.0272	ENSP00000350310,ENSP00000354490	ATP1A2,ATP2B4										GO.0007188	adenylate cyclase-modulating G-protein coupled receptor signaling pathway	11	3.15e-13	ENSP00000260600,ENSP00000262493,ENSP00000294016,ENSP00000297323,ENSP00000327652,ENSP00000354652,ENSP00000354859,ENSP00000355316,ENSP00000358301,ENSP00000367869,ENSP00000386069	ADCY1,ADCY3,ADCY9,ADRA2C,ADRB1,DRD1,DRD2,GNAO1,GNB1,GRM3,NPY1R
4261	Adrenergic signaling in cardiomyocytes	2	0.0499	ENSP00000350310,ENSP00000354490	ATP1A2,ATP2B4										GO.0007186	G-protein coupled receptor signaling pathway	18	9.48e-13	ENSP00000234371,ENSP00000259455,ENSP00000260600,ENSP00000261837,ENSP00000262493,ENSP00000276198,ENSP00000294016,ENSP00000297323,ENSP00000327652,ENSP00000334851,ENSP00000342560,ENSP00000354859,ENSP00000355316,ENSP00000355556,ENSP00000358301,ENSP00000367869,ENSP00000371594,ENSP00000386069	ADCY1,ADCY3,ADCY9,ADRA2C,ADRB1,DRD1,DRD2,GABBR2,GNAO1,GNB1,GNB5,GNG4,GNG7,GRM3,HRH3,HTR2C,KISS1R,RGS7BP
9-Neuronal Ion Channel Clustering
GO Biological Process															KEGG
pathway ID	pathway description	observed gene count	false discovery rate	matching proteins in your network (IDs)	matching proteins in your network (labels)										pathway ID	pathway description	observed gene count	false discovery rate	matching proteins in your network (IDs)	matching proteins in your network (labels)
GO.0071205	protein localization to juxtaparanode region of axon	2	0.00395	ENSP00000330633,ENSP00000344786	CNTN2,NFASC										5032	Morphine addiction	14	1.52e-23	ENSP00000259455,ENSP00000260600,ENSP00000261837,ENSP00000262493,ENSP00000263431,ENSP00000294016,ENSP00000294117,ENSP00000310661,ENSP00000327652,ENSP00000332116,ENSP00000355556,ENSP00000357067,ENSP00000371594,ENSP00000419361	ADCY3,ADCY5,ADCY9,DRD1,GABBR2,GNAO1,GNB5,GNG3,GNG4,GNG7,KCNJ9,PDE4B,PDE7B,PRKCG
GO.0045161	neuronal ion channel clustering	2	0.0217	ENSP00000330633,ENSP00000344786	CNTN2,NFASC										4725	Cholinergic synapse	11	5.26e-16	ENSP00000260600,ENSP00000261837,ENSP00000262493,ENSP00000263431,ENSP00000263826,ENSP00000282356,ENSP00000294016,ENSP00000294117,ENSP00000355556,ENSP00000371594,ENSP00000419361	ADCY3,ADCY5,ADCY9,AKT3,CAMK4,GNAO1,GNB5,GNG3,GNG4,GNG7,PRKCG
															4728	Dopaminergic synapse	11	1.89e-15	ENSP00000261837,ENSP00000262493,ENSP00000263431,ENSP00000263826,ENSP00000294117,ENSP00000327652,ENSP00000354859,ENSP00000355556,ENSP00000357067,ENSP00000371594,ENSP00000419361	ADCY5,AKT3,DRD1,DRD2,GNAO1,GNB5,GNG3,GNG4,GNG7,KCNJ9,PRKCG
10-Extracellular Matrix Organization and Signaling															4727	GABAergic synapse	10	2.05e-15	ENSP00000259455,ENSP00000260600,ENSP00000261837,ENSP00000262493,ENSP00000263431,ENSP00000294016,ENSP00000294117,ENSP00000355556,ENSP00000371594,ENSP00000419361	ADCY3,ADCY5,ADCY9,GABBR2,GNAO1,GNB5,GNG3,GNG4,GNG7,PRKCG
GO Biological Process															4713	Circadian entrainment	10	3.83e-15	ENSP00000260600,ENSP00000261837,ENSP00000262493,ENSP00000263431,ENSP00000294016,ENSP00000294117,ENSP00000355556,ENSP00000357067,ENSP00000371594,ENSP00000419361	ADCY3,ADCY5,ADCY9,GNAO1,GNB5,GNG3,GNG4,GNG7,KCNJ9,PRKCG
pathway ID	pathway description	observed gene count	false discovery rate	matching proteins in your network (IDs)	matching proteins in your network (labels)
GO.0030198	extracellular matrix organization	17	1.25e-19	ENSP00000200181,ENSP00000222573,ENSP00000263556,ENSP00000265131,ENSP00000296181,ENSP00000296585,ENSP00000303242,ENSP00000331902,ENSP00000348385,ENSP00000353654,ENSP00000354923,ENSP00000355180,ENSP00000361834,ENSP00000362776,ENSP00000386896,ENSP00000400365,ENSP00000452120	COL16A1,COL27A1,COL4A2,COL4A5,COL6A1,COL9A2,DMD,ITGA2,ITGA6,ITGA7,ITGB2,ITGB4,ITGB5,ITGB8,LAMA2,P4HA1,TNC										8-Synaptic Transmission/Calcium Transport
GO.0007229	integrin-mediated signaling pathway	9	3.58e-12	ENSP00000200181,ENSP00000222573,ENSP00000228307,ENSP00000296181,ENSP00000296585,ENSP00000303242,ENSP00000362776,ENSP00000386896,ENSP00000452120	COL16A1,ITGA2,ITGA6,ITGA7,ITGB2,ITGB4,ITGB5,ITGB8,PXN										GO Biological Pathway
GO.0030030	cell projection organization	15	7.04e-10	ENSP00000200181,ENSP00000228307,ENSP00000265131,ENSP00000296585,ENSP00000314067,ENSP00000331902,ENSP00000353452,ENSP00000353654,ENSP00000354923,ENSP00000355180,ENSP00000358866,ENSP00000361834,ENSP00000386896,ENSP00000400365,ENSP00000446714	COL4A2,COL4A5,COL6A1,COL9A2,DMD,FLNA,ITGA2,ITGA6,ITGB4,LAMA2,MYL6,MYLK,PAK2,PXN,TNC										pathway ID	pathway description	observed gene count	false discovery rate	matching proteins in your network (IDs)	matching proteins in your network (labels)
GO.0009653	anatomical structure morphogenesis	18	8.53e-09	ENSP00000200181,ENSP00000228307,ENSP00000265131,ENSP00000296181,ENSP00000296585,ENSP00000303242,ENSP00000314067,ENSP00000331902,ENSP00000348385,ENSP00000353452,ENSP00000353654,ENSP00000354923,ENSP00000355180,ENSP00000361834,ENSP00000378288,ENSP00000386896,ENSP00000400365,ENSP00000446714	COL27A1,COL4A2,COL4A5,COL6A1,COL9A2,DMD,ITGA2,ITGA6,ITGB2,ITGB4,ITGB5,LAMA2,MYL6,MYLK,MYLK3,PAK2,PXN,TNC										GO.0007268	synaptic transmission	12	6.14e-12	ENSP00000005284,ENSP00000262138,ENSP00000264357,ENSP00000264426,ENSP00000270458,ENSP00000285900,ENSP00000300105,ENSP00000355537,ENSP00000359719,ENSP00000360608,ENSP00000379098,ENSP00000381412	ACTN2,CACNG2,CACNG3,CACNG4,CACNG8,CAMK2A,CAMK2B,GRIA1,GRIA2,GRIA3,GRIN1,PRKACB
GO.0009888	tissue development	16	1.68e-08	ENSP00000200181,ENSP00000222573,ENSP00000228307,ENSP00000265131,ENSP00000296181,ENSP00000296585,ENSP00000303242,ENSP00000348385,ENSP00000353452,ENSP00000353654,ENSP00000355180,ENSP00000358866,ENSP00000378288,ENSP00000386896,ENSP00000446714,ENSP00000452120	COL27A1,COL4A2,COL6A1,FLNA,ITGA2,ITGA6,ITGA7,ITGB2,ITGB4,ITGB5,ITGB8,MYL6,MYLK,MYLK3,PXN,TNC										GO.0048167	regulation of synaptic plasticity	7	1.81e-08	ENSP00000279593,ENSP00000285900,ENSP00000332549,ENSP00000360608,ENSP00000379098,ENSP00000381412,ENSP00000450832	CAMK2A,CAMK2B,GRIA1,GRIN1,GRIN2A,GRIN2B,SIPA1L1
															GO.0035235	ionotropic glutamate receptor signaling pathway	5	3.01e-08	ENSP00000264357,ENSP00000264426,ENSP00000279593,ENSP00000285900,ENSP00000332549	GRIA1,GRIA2,GRIA3,GRIN2A,GRIN2B
KEGG															GO.0035249	synaptic transmission, glutamatergic	5	1.83e-07	ENSP00000264357,ENSP00000264426,ENSP00000285900,ENSP00000332549,ENSP00000360608	GRIA1,GRIA2,GRIA3,GRIN1,GRIN2A
pathway ID	pathway description	observed gene count	false discovery rate	matching proteins in your network (IDs)	matching proteins in your network (labels)										GO.0006816	calcium ion transport	7	2.51e-07	ENSP00000005284,ENSP00000262138,ENSP00000270458,ENSP00000279593,ENSP00000300105,ENSP00000379098,ENSP00000381412	CACNG2,CACNG3,CACNG4,CACNG8,CAMK2A,CAMK2B,GRIN2B
4510	Focal adhesion	17	5.46e-25	ENSP00000200181,ENSP00000222573,ENSP00000228307,ENSP00000265131,ENSP00000296181,ENSP00000296585,ENSP00000314067,ENSP00000331902,ENSP00000348385,ENSP00000353452,ENSP00000353654,ENSP00000355180,ENSP00000358866,ENSP00000378288,ENSP00000386896,ENSP00000400365,ENSP00000452120	COL27A1,COL4A2,COL4A5,COL6A1,FLNA,ITGA2,ITGA6,ITGA7,ITGB4,ITGB5,ITGB8,LAMA2,MYLK,MYLK3,PAK2,PXN,TNC
4512	ECM-receptor interaction	12	8.29e-20	ENSP00000200181,ENSP00000222573,ENSP00000265131,ENSP00000296181,ENSP00000296585,ENSP00000331902,ENSP00000348385,ENSP00000353654,ENSP00000355180,ENSP00000386896,ENSP00000400365,ENSP00000452120	COL27A1,COL4A2,COL4A5,COL6A1,ITGA2,ITGA6,ITGA7,ITGB4,ITGB5,ITGB8,LAMA2,TNC										KEGG
4810	Regulation of actin cytoskeleton	11	2.6e-13	ENSP00000200181,ENSP00000222573,ENSP00000228307,ENSP00000296181,ENSP00000296585,ENSP00000303242,ENSP00000314067,ENSP00000353452,ENSP00000378288,ENSP00000386896,ENSP00000452120	ITGA2,ITGA6,ITGA7,ITGB2,ITGB4,ITGB5,ITGB8,MYLK,MYLK3,PAK2,PXN										pathway ID	pathway description	observed gene count	false discovery rate	matching proteins in your network (IDs)	matching proteins in your network (labels)
4151	PI3K-Akt signaling pathway	12	9.19e-13	ENSP00000200181,ENSP00000222573,ENSP00000265131,ENSP00000296181,ENSP00000296585,ENSP00000331902,ENSP00000348385,ENSP00000353654,ENSP00000355180,ENSP00000386896,ENSP00000400365,ENSP00000452120	COL27A1,COL4A2,COL4A5,COL6A1,ITGA2,ITGA6,ITGA7,ITGB4,ITGB5,ITGB8,LAMA2,TNC										5031	Amphetamine addiction	9	1.27e-16	ENSP00000264357,ENSP00000264426,ENSP00000279593,ENSP00000285900,ENSP00000332549,ENSP00000359719,ENSP00000360608,ENSP00000379098,ENSP00000381412	CAMK2A,CAMK2B,GRIA1,GRIA2,GRIA3,GRIN1,GRIN2A,GRIN2B,PRKACB
5412	Arrhythmogenic right ventricular cardiomyopathy (ARVC)	8	4.11e-12	ENSP00000200181,ENSP00000222573,ENSP00000296181,ENSP00000296585,ENSP00000354923,ENSP00000386896,ENSP00000400365,ENSP00000452120	DMD,ITGA2,ITGA6,ITGA7,ITGB4,ITGB5,ITGB8,LAMA2										4713	Circadian entrainment	9	1.39e-15	ENSP00000264357,ENSP00000264426,ENSP00000279593,ENSP00000285900,ENSP00000332549,ENSP00000359719,ENSP00000360608,ENSP00000379098,ENSP00000381412	CAMK2A,CAMK2B,GRIA1,GRIA2,GRIA3,GRIN1,GRIN2A,GRIN2B,PRKACB
															4720	Long-term potentiation	8	1.16e-14	ENSP00000264426,ENSP00000279593,ENSP00000285900,ENSP00000332549,ENSP00000359719,ENSP00000360608,ENSP00000379098,ENSP00000381412	CAMK2A,CAMK2B,GRIA1,GRIA2,GRIN1,GRIN2A,GRIN2B,PRKACB
11-Receptor Mediated Cell Signaling															4728	Dopaminergic synapse	8	2.42e-12	ENSP00000264357,ENSP00000264426,ENSP00000279593,ENSP00000285900,ENSP00000332549,ENSP00000359719,ENSP00000379098,ENSP00000381412	CAMK2A,CAMK2B,GRIA1,GRIA2,GRIA3,GRIN2A,GRIN2B,PRKACB
GO Biological Pathway															5033	Nicotine addiction	6	2.24e-11	ENSP00000264357,ENSP00000264426,ENSP00000279593,ENSP00000285900,ENSP00000332549,ENSP00000360608	GRIA1,GRIA2,GRIA3,GRIN1,GRIN2A,GRIN2B
pathway ID	pathway description	observed gene count	false discovery rate	matching proteins in your network (IDs)	matching proteins in your network (labels)
GO.0007167	enzyme linked receptor protein signaling pathway	20	6.66e-18	ENSP00000262719,ENSP00000263409,ENSP00000268035,ENSP00000286301,ENSP00000301178,ENSP00000303830,ENSP00000324740,ENSP00000338548,ENSP00000338799,ENSP00000346508,ENSP00000346671,ENSP00000354952,ENSP00000357392,ENSP00000365016,ENSP00000366563,ENSP00000410294,ENSP00000427941,ENSP00000428340,ENSP00000428924,ENSP00000451040	ANGPT1,ATP6V0E1,AXL,CSF1R,EFNA1,FGF1,FGFR2,FYN,GAB2,IGF1R,IL6ST,INSR,IRS2,LIFR,LYN,PDGFA,PGF,PHLPP1,PIK3CD,YES1										9-MAPK1 Signaling
GO.0007169	transmembrane receptor protein tyrosine kinase signaling pathway	18	5.66e-17	ENSP00000262719,ENSP00000268035,ENSP00000286301,ENSP00000301178,ENSP00000303830,ENSP00000324740,ENSP00000338548,ENSP00000346508,ENSP00000346671,ENSP00000354952,ENSP00000357392,ENSP00000365016,ENSP00000366563,ENSP00000410294,ENSP00000427941,ENSP00000428340,ENSP00000428924,ENSP00000451040	ANGPT1,ATP6V0E1,AXL,CSF1R,EFNA1,FGF1,FGFR2,FYN,GAB2,IGF1R,INSR,IRS2,LYN,PDGFA,PGF,PHLPP1,PIK3CD,YES1										GO Biological Process
GO.0048015	phosphatidylinositol-mediated signaling	12	4.76e-16	ENSP00000262719,ENSP00000262995,ENSP00000268035,ENSP00000286301,ENSP00000338548,ENSP00000339824,ENSP00000346508,ENSP00000346671,ENSP00000354952,ENSP00000365016,ENSP00000366563,ENSP00000410294	CSF1R,FGF1,FGFR2,FGFR3,FYN,GAB1,GAB2,IGF1R,IRS2,PDGFA,PHLPP1,PIK3CD										pathway ID	pathway description	observed gene count	false discovery rate	matching proteins in your network (IDs)	matching proteins in your network (labels)
GO.0038093	Fc receptor signaling pathway	12	1.28e-13	ENSP00000262719,ENSP00000262995,ENSP00000324740,ENSP00000338548,ENSP00000339824,ENSP00000346508,ENSP00000346671,ENSP00000354952,ENSP00000365016,ENSP00000366563,ENSP00000410294,ENSP00000428924	FGF1,FGFR2,FGFR3,FYN,GAB1,GAB2,IRS2,LYN,PDGFA,PHLPP1,PIK3CD,YES1										GO.0006796	phosphate-containing compound metabolic process	12	4.7e-08	ENSP00000215832,ENSP00000247161,ENSP00000262752,ENSP00000279488,ENSP00000283228,ENSP00000306124,ENSP00000309116,ENSP00000309845,ENSP00000329539,ENSP00000331602,ENSP00000351342,ENSP00000368884	DUSP6,DUSP8,ELK1,HRAS,MAPK1,PRKCD,PRKCE,PTPN5,PTPN7,PTPRR,RPS6KA3,RPS6KA6
GO.0038095	Fc-epsilon receptor signaling pathway	11	3.15e-13	ENSP00000262719,ENSP00000262995,ENSP00000338548,ENSP00000339824,ENSP00000346508,ENSP00000346671,ENSP00000354952,ENSP00000365016,ENSP00000366563,ENSP00000410294,ENSP00000428924	FGF1,FGFR2,FGFR3,FYN,GAB1,GAB2,IRS2,LYN,PDGFA,PHLPP1,PIK3CD										GO.0002758	innate immune response-activating signal transduction	7	2.75e-07	ENSP00000215832,ENSP00000247161,ENSP00000279488,ENSP00000306124,ENSP00000309845,ENSP00000331602,ENSP00000368884	DUSP6,ELK1,HRAS,MAPK1,PRKCD,PRKCE,RPS6KA3
															GO.0048011	neurotrophin TRK receptor signaling pathway	7	4.82e-07	ENSP00000215832,ENSP00000247161,ENSP00000279488,ENSP00000306124,ENSP00000309845,ENSP00000331602,ENSP00000368884	DUSP6,ELK1,HRAS,MAPK1,PRKCD,PRKCE,RPS6KA3
KEGG															GO.0006464	cellular protein modification process	12	7.33e-07	ENSP00000215832,ENSP00000247161,ENSP00000262752,ENSP00000279488,ENSP00000283228,ENSP00000306124,ENSP00000309116,ENSP00000309845,ENSP00000329539,ENSP00000331602,ENSP00000351342,ENSP00000368884	DUSP6,DUSP8,ELK1,HRAS,MAPK1,PRKCD,PRKCE,PTPN5,PTPN7,PTPRR,RPS6KA3,RPS6KA6
pathway ID	pathway description	observed gene count	false discovery rate	matching proteins in your network (IDs)	matching proteins in your network (labels)										GO.0007167	enzyme linked receptor protein signaling pathway	9	8.54e-07	ENSP00000215832,ENSP00000239938,ENSP00000247161,ENSP00000279488,ENSP00000283228,ENSP00000306124,ENSP00000309845,ENSP00000331602,ENSP00000368884	DUSP6,EGR1,ELK1,HRAS,MAPK1,PRKCD,PRKCE,PTPRR,RPS6KA3
4014	Ras signaling pathway	14	1.72e-18	ENSP00000262848,ENSP00000262995,ENSP00000268035,ENSP00000286301,ENSP00000303830,ENSP00000338548,ENSP00000339824,ENSP00000346508,ENSP00000354952,ENSP00000357392,ENSP00000366563,ENSP00000410294,ENSP00000428340,ENSP00000451040	ANGPT1,CSF1R,EFNA1,FGF1,FGFR2,FGFR3,GAB1,GAB2,IGF1R,INSR,PDGFA,PGF,PIK3CD,PRKX
4151	PI3K-Akt signaling pathway	13	2.16e-14	ENSP00000262719,ENSP00000268035,ENSP00000274276,ENSP00000286301,ENSP00000303830,ENSP00000338548,ENSP00000339824,ENSP00000346508,ENSP00000357392,ENSP00000366563,ENSP00000410294,ENSP00000428340,ENSP00000451040	ANGPT1,CSF1R,EFNA1,FGF1,FGFR2,FGFR3,IGF1R,INSR,OSMR,PDGFA,PGF,PHLPP1,PIK3CD										KEGG
4015	Rap1 signaling pathway	11	1.31e-13	ENSP00000268035,ENSP00000286301,ENSP00000303830,ENSP00000338548,ENSP00000339824,ENSP00000346508,ENSP00000357392,ENSP00000366563,ENSP00000410294,ENSP00000428340,ENSP00000451040	ANGPT1,CSF1R,EFNA1,FGF1,FGFR2,FGFR3,IGF1R,INSR,PDGFA,PGF,PIK3CD										pathway ID	pathway description	observed gene count	false discovery rate	matching proteins in your network (IDs)	matching proteins in your network (labels)
5200	Pathways in cancer	8	5.58e-07	ENSP00000268035,ENSP00000286301,ENSP00000338548,ENSP00000339824,ENSP00000346508,ENSP00000366563,ENSP00000410294,ENSP00000451040	CSF1R,FGF1,FGFR2,FGFR3,IGF1R,PDGFA,PGF,PIK3CD										4010	MAPK signaling pathway	10	1.78e-14	ENSP00000215832,ENSP00000247161,ENSP00000262752,ENSP00000279488,ENSP00000283228,ENSP00000309116,ENSP00000309845,ENSP00000329539,ENSP00000351342,ENSP00000368884	DUSP6,DUSP8,ELK1,HRAS,MAPK1,PTPN5,PTPN7,PTPRR,RPS6KA3,RPS6KA6
4510	Focal adhesion	6	1.54e-05	ENSP00000268035,ENSP00000295006,ENSP00000346508,ENSP00000346671,ENSP00000366563,ENSP00000451040	CAPN2,FYN,IGF1R,PDGFA,PGF,PIK3CD										4722	Neurotrophin signaling pathway	5	1.42e-06	ENSP00000215832,ENSP00000262752,ENSP00000309845,ENSP00000331602,ENSP00000368884	HRAS,MAPK1,PRKCD,RPS6KA3,RPS6KA6
															4664	Fc epsilon RI signaling pathway	4	6.93e-06	ENSP00000215832,ENSP00000306124,ENSP00000309845,ENSP00000331602	HRAS,MAPK1,PRKCD,PRKCE
12-Endocytosis															4720	Long-term potentiation	4	6.93e-06	ENSP00000215832,ENSP00000262752,ENSP00000309845,ENSP00000368884	HRAS,MAPK1,RPS6KA3,RPS6KA6
GO Biological Pathway															4912	GnRH signaling pathway	4	1.7e-05	ENSP00000215832,ENSP00000247161,ENSP00000309845,ENSP00000331602	ELK1,HRAS,MAPK1,PRKCD
pathway ID	pathway description	observed gene count	false discovery rate	matching proteins in your network (IDs)	matching proteins in your network (labels)
GO.0016192	vesicle-mediated transport	15	6.89e-12	ENSP00000263246,ENSP00000263816,ENSP00000263864,ENSP00000265970,ENSP00000267540,ENSP00000298229,ENSP00000310969,ENSP00000316779,ENSP00000317332,ENSP00000347244,ENSP00000369318,ENSP00000370719,ENSP00000376024,ENSP00000385834,ENSP00000454071	BIN1,INPPL1,ITSN1,ITSN2,LDLR,LRP2,PACSIN2,PIK3C2A,RHOBTB3,SNX18,SNX9,STON1,STON2,TF,VAMP8										10-Phospholipid Metabolism
GO.0006897	endocytosis	12	1.35e-11	ENSP00000263246,ENSP00000263816,ENSP00000265970,ENSP00000267540,ENSP00000298229,ENSP00000310969,ENSP00000316779,ENSP00000317332,ENSP00000347244,ENSP00000370719,ENSP00000376024,ENSP00000454071	BIN1,INPPL1,ITSN1,ITSN2,LDLR,LRP2,PACSIN2,PIK3C2A,SNX18,SNX9,STON1,STON2										GO Biological Pathway
GO.0060988	lipid tube assembly	2	0.0125	ENSP00000316779,ENSP00000376024	BIN1,SNX9										pathway ID	pathway description	observed gene count	false discovery rate	matching proteins in your network (IDs)	matching proteins in your network (labels)
GO.0006810	transport	12	0.0172	ENSP00000263246,ENSP00000263816,ENSP00000263864,ENSP00000265970,ENSP00000298229,ENSP00000310969,ENSP00000316779,ENSP00000347244,ENSP00000369318,ENSP00000370719,ENSP00000376024,ENSP00000454071	BIN1,INPPL1,ITSN1,ITSN2,LDLR,LRP2,PACSIN2,PIK3C2A,RHOBTB3,SNX9,STON1,VAMP8										GO.0006796	phosphate-containing compound metabolic process	15	3.24e-13	ENSP00000228027,ENSP00000251473,ENSP00000260585,ENSP00000261596,ENSP00000282541,ENSP00000284061,ENSP00000288490,ENSP00000309757,ENSP00000317300,ENSP00000348901,ENSP00000352547,ENSP00000352962,ENSP00000355963,ENSP00000359204,ENSP00000412178	DGAT2,DGKE,DGKI,DGKZ,EPT1,GPAT2,GPD1L,LPCAT4,LPGAT1,LPIN2,LPL,LPPR2,LPPR3,LPPR4,PLD3
GO.0036089	cleavage furrow formation	2	0.0437	ENSP00000317332,ENSP00000376024	SNX18,SNX9										GO.0006644	phospholipid metabolic process	10	1.98e-12	ENSP00000228027,ENSP00000260585,ENSP00000261596,ENSP00000282541,ENSP00000284061,ENSP00000309757,ENSP00000317300,ENSP00000348901,ENSP00000352547,ENSP00000355963	DGAT2,DGKE,EPT1,GPAT2,GPD1L,LPCAT4,LPGAT1,LPIN2,LPL,PLD3
															GO.0044255	cellular lipid metabolic process	12	7.55e-12	ENSP00000228027,ENSP00000260585,ENSP00000261596,ENSP00000282541,ENSP00000284061,ENSP00000309757,ENSP00000317300,ENSP00000348901,ENSP00000352547,ENSP00000355963,ENSP00000359204,ENSP00000412178	DGAT2,DGKE,DGKZ,EPT1,GPAT2,GPD1L,LPCAT4,LPGAT1,LPIN2,LPL,LPPR4,PLD3
13-Inflammation/Regulation of Transcription															GO.0008654	phospholipid biosynthetic process	9	1.57e-11	ENSP00000228027,ENSP00000260585,ENSP00000261596,ENSP00000282541,ENSP00000284061,ENSP00000317300,ENSP00000348901,ENSP00000352547,ENSP00000355963	DGAT2,DGKE,EPT1,GPAT2,GPD1L,LPCAT4,LPGAT1,LPIN2,PLD3
GO Biological Process															GO.0045017	glycerolipid biosynthetic process	9	1.57e-11	ENSP00000228027,ENSP00000260585,ENSP00000261596,ENSP00000282541,ENSP00000309757,ENSP00000317300,ENSP00000348901,ENSP00000352547,ENSP00000355963	DGAT2,EPT1,GPAT2,GPD1L,LPCAT4,LPGAT1,LPIN2,LPL,PLD3
pathway ID	pathway description	observed gene count	false discovery rate	matching proteins in your network (IDs)	matching proteins in your network (labels)
GO.0048732	gland development	7	0.000181	ENSP00000231509,ENSP00000310301,ENSP00000329357,ENSP00000360266,ENSP00000376436,ENSP00000384273,ENSP00000387699	CREB1,ETS1,JUN,NR3C1,RELA,SP1,SP3										KEGG
GO.0034146	toll-like receptor 5 signaling pathway	4	0.000924	ENSP00000340089,ENSP00000360266,ENSP00000384273,ENSP00000387699	CREB1,JUN,RELA,TLR5										pathway ID	pathway description	observed gene count	false discovery rate	matching proteins in your network (IDs)	matching proteins in your network (labels)
GO.0034166	toll-like receptor 10 signaling pathway	4	0.000924	ENSP00000340089,ENSP00000360266,ENSP00000384273,ENSP00000387699	CREB1,JUN,RELA,TLR5										564	Glycerophospholipid metabolism	10	1.54e-18	ENSP00000260585,ENSP00000261596,ENSP00000282541,ENSP00000284061,ENSP00000288490,ENSP00000317300,ENSP00000348901,ENSP00000352547,ENSP00000355963,ENSP00000412178	DGKE,DGKI,DGKZ,EPT1,GPAT2,GPD1L,LPCAT4,LPGAT1,LPIN2,PLD3
GO.0045944	positive regulation of transcription from RNA polymerase II promoter	8	0.000996	ENSP00000231509,ENSP00000310301,ENSP00000344352,ENSP00000360266,ENSP00000374455,ENSP00000376436,ENSP00000384273,ENSP00000387699	ATF3,CREB1,ETS1,JUN,NR3C1,RELA,SP3,SQSTM1										561	Glycerolipid metabolism	7	5.42e-13	ENSP00000228027,ENSP00000261596,ENSP00000284061,ENSP00000288490,ENSP00000309757,ENSP00000352547,ENSP00000412178	DGAT2,DGKE,DGKI,DGKZ,GPAT2,LPIN2,LPL
GO.0002755	MyD88-dependent toll-like receptor signaling pathway	4	0.00137	ENSP00000340089,ENSP00000360266,ENSP00000384273,ENSP00000387699	CREB1,JUN,RELA,TLR5										1100	Metabolic pathways	9	2.08e-06	ENSP00000228027,ENSP00000260585,ENSP00000261596,ENSP00000284061,ENSP00000288490,ENSP00000317300,ENSP00000348901,ENSP00000352547,ENSP00000412178	DGAT2,DGKE,DGKI,DGKZ,EPT1,GPAT2,LPCAT4,LPIN2,PLD3
															565	Ether lipid metabolism	3	0.000222	ENSP00000260585,ENSP00000317300,ENSP00000348901	EPT1,LPCAT4,PLD3
KEGG															4070	Phosphatidylinositol signaling system	3	0.00135	ENSP00000284061,ENSP00000288490,ENSP00000412178	DGKE,DGKI,DGKZ
pathway ID	pathway description	observed gene count	false discovery rate	matching proteins in your network (IDs)	matching proteins in your network (labels)
4915	Estrogen signaling pathway	4	0.000206	ENSP00000329357,ENSP00000338160,ENSP00000360266,ENSP00000387699	CREB1,FKBP5,JUN,SP1										11-GTPase Signal Transduction
5166	HTLV-I infection	5	0.000206	ENSP00000344352,ENSP00000360266,ENSP00000376436,ENSP00000384273,ENSP00000387699	ATF3,CREB1,ETS1,JUN,RELA										GO Biological Process
4380	Osteoclast differentiation	4	0.000267	ENSP00000360266,ENSP00000374455,ENSP00000384273,ENSP00000387699	CREB1,JUN,RELA,SQSTM1										pathway ID	pathway description	observed gene count	false discovery rate	matching proteins in your network (IDs)	matching proteins in your network (labels)
5030	Cocaine addiction	3	0.000615	ENSP00000360266,ENSP00000384273,ENSP00000387699	CREB1,JUN,RELA										GO.0051056	regulation of small GTPase mediated signal transduction	12	2.28e-17	ENSP00000219409,ENSP00000263674,ENSP00000264051,ENSP00000269321,ENSP00000276297,ENSP00000303507,ENSP00000310561,ENSP00000314458,ENSP00000316845,ENSP00000320038,ENSP00000386741,ENSP00000427926	ARHGAP32,ARHGAP33,ARHGDIA,ARHGDIG,ARHGEF17,ARHGEF4,BCR,CDC42,CHN1,DLC1,NGEF,RHOBTB2
5031	Amphetamine addiction	3	0.000965	ENSP00000319060,ENSP00000360266,ENSP00000387699	CAMK2G,CREB1,JUN										GO.0007264	small GTPase mediated signal transduction	14	4e-16	ENSP00000216127,ENSP00000219409,ENSP00000263674,ENSP00000264051,ENSP00000269321,ENSP00000276297,ENSP00000303507,ENSP00000310561,ENSP00000314458,ENSP00000316845,ENSP00000320038,ENSP00000371341,ENSP00000386741,ENSP00000427926	ARHGAP32,ARHGAP33,ARHGDIA,ARHGDIG,ARHGEF17,ARHGEF4,BCR,CDC42,CHN1,DLC1,NGEF,RASD2,RHOBTB2,TNK2
															GO.0035556	intracellular signal transduction	16	1.63e-14	ENSP00000216127,ENSP00000219409,ENSP00000261845,ENSP00000263674,ENSP00000264051,ENSP00000269321,ENSP00000276297,ENSP00000303507,ENSP00000310561,ENSP00000314458,ENSP00000316845,ENSP00000320038,ENSP00000371341,ENSP00000386741,ENSP00000427926,ENSP00000451263	ARHGAP32,ARHGAP33,ARHGDIA,ARHGDIG,ARHGEF17,ARHGEF4,BCR,CDC42,CHN1,DLC1,MAP3K9,MAPK6,NGEF,RASD2,RHOBTB2,TNK2
14-Wound Healing and Inflammation															GO.0043087	regulation of GTPase activity	11	2.3e-11	ENSP00000219409,ENSP00000263674,ENSP00000264051,ENSP00000269321,ENSP00000276297,ENSP00000303507,ENSP00000310561,ENSP00000316845,ENSP00000320038,ENSP00000371341,ENSP00000386741	ARHGAP32,ARHGAP33,ARHGDIA,ARHGDIG,ARHGEF17,ARHGEF4,BCR,CHN1,DLC1,NGEF,TNK2
GO Biological Process															GO.1902531	regulation of intracellular signal transduction	13	2.41e-10	ENSP00000216127,ENSP00000219409,ENSP00000263674,ENSP00000264051,ENSP00000269321,ENSP00000276297,ENSP00000303507,ENSP00000310561,ENSP00000316845,ENSP00000320038,ENSP00000386741,ENSP00000427926,ENSP00000451263	ARHGAP32,ARHGAP33,ARHGDIA,ARHGDIG,ARHGEF17,ARHGEF4,BCR,CHN1,DLC1,MAP3K9,NGEF,RASD2,RHOBTB2
pathway ID	pathway description	observed gene count	false discovery rate	matching proteins in your network (IDs)	matching proteins in your network (labels)
GO.0002576	platelet degranulation	7	2.54e-09	ENSP00000218388,ENSP00000221930,ENSP00000257857,ENSP00000261405,ENSP00000278407,ENSP00000348068,ENSP00000355896	CD63,SERPINA1,SERPING1,TGFB1,TGFB2,TIMP1,VWF										KEGG
GO.0030168	platelet activation	8	1.67e-08	ENSP00000218388,ENSP00000221930,ENSP00000257857,ENSP00000261405,ENSP00000278407,ENSP00000348068,ENSP00000355896,ENSP00000365411	APBB1IP,CD63,SERPINA1,SERPING1,TGFB1,TGFB2,TIMP1,VWF										pathway ID	pathway description	observed gene count	false discovery rate	matching proteins in your network (IDs)	matching proteins in your network (labels)
GO.0042060	wound healing	10	2.6e-08	ENSP00000218388,ENSP00000221930,ENSP00000257857,ENSP00000261405,ENSP00000266085,ENSP00000278407,ENSP00000333203,ENSP00000348068,ENSP00000355896,ENSP00000365411	APBB1IP,CD63,SERPINA1,SERPINA5,SERPING1,TGFB1,TGFB2,TIMP1,TIMP3,VWF										4722	Neurotrophin signaling pathway	3	0.0264	ENSP00000219409,ENSP00000269321,ENSP00000314458	ARHGDIA,ARHGDIG,CDC42
GO.0007596	blood coagulation	9	6.58e-08	ENSP00000218388,ENSP00000221930,ENSP00000257857,ENSP00000261405,ENSP00000278407,ENSP00000333203,ENSP00000348068,ENSP00000355896,ENSP00000365411	APBB1IP,CD63,SERPINA1,SERPINA5,SERPING1,TGFB1,TGFB2,TIMP1,VWF
GO.0051346	negative regulation of hydrolase activity	7	9.69e-06	ENSP00000218388,ENSP00000266085,ENSP00000268182,ENSP00000278407,ENSP00000333203,ENSP00000348068,ENSP00000355896	IQGAP1,SERPINA1,SERPINA5,SERPING1,TGFB2,TIMP1,TIMP3										12-Protein Ubiquitination
															GO Biological Process
KEGG															pathway ID	pathway description	observed gene count	FDR	matching proteins in your network (IDs)	matching proteins in your network (labels)
pathway ID	pathway description	observed gene count	false discovery rate	matching proteins in your network (IDs)	matching proteins in your network (labels)										GO.0016567	protein ubiquitination	8	1.13e-06	ENSP00000263925,ENSP00000298355,ENSP00000354775,ENSP00000355014,ENSP00000383199,ENSP00000430237,ENSP00000433352,ENSP00000443191	KLHL13,LMO7,LNX1,NEDD4L,PJA1,PJA2,RNF130,TRIM9
4350	TGF-beta signaling pathway	4	4.68e-05	ENSP00000221930,ENSP00000295228,ENSP00000355896,ENSP00000386043	INHBB,LTBP1,TGFB1,TGFB2										GO.0030163	protein catabolic process	6	0.000693	ENSP00000263925,ENSP00000265339,ENSP00000298355,ENSP00000342121,ENSP00000355014,ENSP00000383199	LNX1,NEDD4L,PJA1,RNF6,TRIM9,UBE2B
4610	Complement and coagulation cascades	4	4.68e-05	ENSP00000261405,ENSP00000278407,ENSP00000333203,ENSP00000348068	SERPINA1,SERPINA5,SERPING1,VWF										GO.0006511	ubiquitin-dependent protein catabolic process	5	0.00458	ENSP00000263925,ENSP00000265339,ENSP00000298355,ENSP00000342121,ENSP00000383199	LNX1,NEDD4L,RNF6,TRIM9,UBE2B
5205	Proteoglycans in cancer	5	4.99e-05	ENSP00000221930,ENSP00000257857,ENSP00000266085,ENSP00000268182,ENSP00000355896	CD63,IQGAP1,TGFB1,TGFB2,TIMP3										GO.0070936	protein K48-linked ubiquitination	3	0.00458	ENSP00000265339,ENSP00000342121,ENSP00000383199	NEDD4L,RNF6,UBE2B
5152	Tuberculosis	3	0.0209	ENSP00000221930,ENSP00000323178,ENSP00000355896	KSR1,TGFB1,TGFB2										GO.0044257	cellular protein catabolic process	5	0.00568	ENSP00000263925,ENSP00000265339,ENSP00000298355,ENSP00000342121,ENSP00000383199	LNX1,NEDD4L,RNF6,TRIM9,UBE2B
4060	Cytokine-cytokine receptor interaction	3	0.0312	ENSP00000221930,ENSP00000295228,ENSP00000355896	INHBB,TGFB1,TGFB2
															KEGG
15-mRNA Processing															pathway ID	pathway description	observed gene count	FDR	matching proteins in your network (IDs)	matching proteins in your network (labels)
GO Biological Process															4120	Ubiquitin mediated proteolysis	3	0.0166	ENSP00000265428,ENSP00000383199,ENSP00000443191	KLHL13,NEDD4L,WWP1
pathway ID	pathway description	observed gene count	false discovery rate	matching proteins in your network (IDs)	matching proteins in your network (labels)
GO.0000398	mRNA splicing, via spliceosome	7	6.31e-08	ENSP00000240304,ENSP00000246194,ENSP00000258962,ENSP00000265866,ENSP00000346694,ENSP00000358635,ENSP00000376309	HNRNPA2B1,HNRNPA3,HNRNPH3,LUC7L3,RALY,SRSF1,SYNCRIP										13-Regulation of Potassium
GO.0006397	mRNA processing	8	6.31e-08	ENSP00000240304,ENSP00000246194,ENSP00000258962,ENSP00000265866,ENSP00000346694,ENSP00000348538,ENSP00000358635,ENSP00000376309	HNRNPA2B1,HNRNPA3,HNRNPH3,LUC7L3,RALY,RBM38,SRSF1,SYNCRIP										GO Biological Process
GO.0008380	RNA splicing	7	8.16e-07	ENSP00000246194,ENSP00000258962,ENSP00000265866,ENSP00000346694,ENSP00000348538,ENSP00000358635,ENSP00000376309	HNRNPA2B1,HNRNPA3,HNRNPH3,RALY,RBM38,SRSF1,SYNCRIP										pathway ID	pathway description	observed gene count	false discovery rate	matching proteins in your network (IDs)	matching proteins in your network (labels)
GO.0006396	RNA processing	8	2.63e-06	ENSP00000246194,ENSP00000258962,ENSP00000265866,ENSP00000346694,ENSP00000348538,ENSP00000358635,ENSP00000376309,ENSP00000380033	DDX17,HNRNPA2B1,HNRNPA3,HNRNPH3,RALY,RBM38,SRSF1,SYNCRIP										GO.1904062	regulation of cation transmembrane transport	6	2.75e-06	ENSP00000265969,ENSP00000317310,ENSP00000337459,ENSP00000371587,ENSP00000395323,ENSP00000420040	CABP1,KCNC1,KCNIP1,KCNIP2,KCNIP4,NOS1
GO.0043488	regulation of mRNA stability	4	4.15e-05	ENSP00000258962,ENSP00000348538,ENSP00000358635,ENSP00000385269	ELAVL1,RBM38,SRSF1,SYNCRIP										GO.0043266	regulation of potassium ion transport	5	3.54e-06	ENSP00000265969,ENSP00000337459,ENSP00000371587,ENSP00000395323,ENSP00000420040	KCNC1,KCNIP1,KCNIP2,KCNIP4,NOS1
															GO.0010959	regulation of metal ion transport	6	4.28e-05	ENSP00000265969,ENSP00000317310,ENSP00000337459,ENSP00000371587,ENSP00000395323,ENSP00000420040	CABP1,KCNC1,KCNIP1,KCNIP2,KCNIP4,NOS1
16-Endoplasmic Reticulum Stress															GO.0034765	regulation of ion transmembrane transport	6	7.33e-05	ENSP00000317310,ENSP00000337459,ENSP00000361475,ENSP00000371587,ENSP00000395323,ENSP00000420040	CABP1,KCNIP1,KCNIP2,KCNIP4,NCS1,NOS1
GO Biological Process															GO.1901379	regulation of potassium ion transmembrane transport	4	7.33e-05	ENSP00000265969,ENSP00000371587,ENSP00000395323,ENSP00000420040	KCNC1,KCNIP1,KCNIP2,KCNIP4
pathway ID	pathway description	observed gene count	false discovery rate	matching proteins in your network (IDs)	matching proteins in your network (labels)
GO.0006986	response to unfolded protein	5	9.58e-05	ENSP00000243253,ENSP00000247207,ENSP00000254322,ENSP00000338019,ENSP00000365991	DNAJB1,DNAJB2,DNAJC3,HSPA2,SEC61A1										14-Nervous System Development
GO.0090084	negative regulation of inclusion body assembly	3	9.58e-05	ENSP00000247207,ENSP00000254322,ENSP00000338019	DNAJB1,DNAJB2,HSPA2										GO Biological Process
GO.0042026	protein refolding	3	0.00041	ENSP00000247207,ENSP00000254322,ENSP00000338019	DNAJB1,DNAJB2,HSPA2										pathway ID	pathway description	observed gene count	false discovery rate	matching proteins in your network (IDs)	matching proteins in your network (labels)
GO.0032781	positive regulation of ATPase activity	3	0.00191	ENSP00000247207,ENSP00000254322,ENSP00000349525	AHSA2,DNAJB1,HSPA2										GO.0006468	protein phosphorylation	6	0.0215	ENSP00000009105,ENSP00000256460,ENSP00000260386,ENSP00000350785,ENSP00000368124,ENSP00000405950	CAMK1,CAMK1D,CAMK1G,DAPK1,ITPKA,PNCK
GO.0034976	response to endoplasmic reticulum stress	4	0.00657	ENSP00000243253,ENSP00000274140,ENSP00000338019,ENSP00000365991	DNAJB2,DNAJC3,MARCH6,SEC61A1										GO.0007399	nervous system development	8	0.0215	ENSP00000256460,ENSP00000260386,ENSP00000272298,ENSP00000284292,ENSP00000349960,ENSP00000353508,ENSP00000368124,ENSP00000377372	ACTB,CALM2,CAMK1,CAMK1D,GAP43,ITPKA,MAP2,NRGN
KEGG															KEGG
pathway ID	pathway description	observed gene count	false discovery rate	matching proteins in your network (IDs)	matching proteins in your network (labels)										pathway ID	pathway description	observed gene count	false discovery rate	matching proteins in your network (IDs)	matching proteins in your network (labels)
4141	Protein processing in endoplasmic reticulum	6	5.73e-08	ENSP00000243253,ENSP00000247207,ENSP00000254322,ENSP00000274140,ENSP00000338019,ENSP00000365991	DNAJB1,DNAJB2,DNAJC3,HSPA2,MARCH6,SEC61A1										4921	Oxytocin signaling pathway	4	0.000571	ENSP00000009105,ENSP00000256460,ENSP00000349960,ENSP00000368124	ACTB,CAMK1,CAMK1D,CAMK1G
5164	Influenza A	3	0.0157	ENSP00000247207,ENSP00000254322,ENSP00000365991	DNAJB1,DNAJC3,HSPA2										5412	Arrhythmogenic right ventricular cardiomyopathy (ARVC)	3	0.00174	ENSP00000349960,ENSP00000377941,ENSP00000440045	ACTB,ACTN1,ATP2A2
17-GTPase Signaling/Actin Cytoskeleton															15-GABAergic Synapse
GO Biological Process															GO Biological Pathway
pathway ID	pathway description	observed gene count	false discovery rate	matching proteins in your network (IDs)	matching proteins in your network (labels)										pathway ID	pathway description	observed gene count	false discovery rate	matching proteins in your network (IDs)	matching proteins in your network (labels)
GO.0007264	small GTPase mediated signal transduction	9	1.53e-08	ENSP00000228945,ENSP00000247170,ENSP00000260526,ENSP00000275189,ENSP00000285735,ENSP00000288670,ENSP00000338671,ENSP00000347134,ENSP00000359552	ARHGAP18,ARHGAP29,ARHGDIB,DAAM1,FMNL2,NET1,PKN2,RHOBTB1,RHOC										GO.1902476	chloride transmembrane transport	9	3.28e-17	ENSP00000023897,ENSP00000264318,ENSP00000264428,ENSP00000274547,ENSP00000299267,ENSP00000335592,ENSP00000348897,ENSP00000367848,ENSP00000410732	GABRA1,GABRA2,GABRA4,GABRA5,GABRB2,GABRB3,GABRD,GABRG2,GLRB
GO.0051056	regulation of small GTPase mediated signal transduction	7	2.31e-08	ENSP00000228945,ENSP00000260526,ENSP00000275189,ENSP00000285735,ENSP00000338671,ENSP00000347134,ENSP00000355652	ARHGAP18,ARHGAP29,ARHGDIB,NET1,RHOBTB1,RHOC,RHOU										GO.0007214	gamma-aminobutyric acid signaling pathway	6	4.78e-13	ENSP00000023897,ENSP00000264318,ENSP00000274547,ENSP00000335592,ENSP00000348897,ENSP00000410732	GABRA1,GABRA2,GABRA4,GABRA5,GABRB2,GABRG2
GO.0030036	actin cytoskeleton organization	5	0.00243	ENSP00000228945,ENSP00000247170,ENSP00000274867,ENSP00000288670,ENSP00000355652	ARHGDIB,DAAM1,DAAM2,FMNL2,RHOU										GO.0071420	cellular response to histamine	4	3.08e-09	ENSP00000023897,ENSP00000274547,ENSP00000299267,ENSP00000410732	GABRA1,GABRB2,GABRB3,GABRG2
GO.0044700	single organism signaling	9	0.0498	ENSP00000228945,ENSP00000247170,ENSP00000260526,ENSP00000275189,ENSP00000285735,ENSP00000288670,ENSP00000338671,ENSP00000347134,ENSP00000359552	ARHGAP18,ARHGAP29,ARHGDIB,DAAM1,FMNL2,NET1,PKN2,RHOBTB1,RHOC										GO.0007268	synaptic transmission	8	1.14e-08	ENSP00000023897,ENSP00000253401,ENSP00000264318,ENSP00000274547,ENSP00000335592,ENSP00000348897,ENSP00000367848,ENSP00000410732	ARHGEF9,GABRA1,GABRA2,GABRA4,GABRA5,GABRB2,GABRD,GABRG2
															GO.0051932	synaptic transmission, GABAergic	3	1.66e-06	ENSP00000023897,ENSP00000274547,ENSP00000410732	GABRA1,GABRB2,GABRG2
18-Cell Signaling
GO Biological Pathway															KEGG
pathway ID	pathway description	observed gene count	false discovery rate	matching proteins in your network (IDs)	matching proteins in your network (labels)										pathway ID	pathway description	observed gene count	false discovery rate	matching proteins in your network (IDs)	matching proteins in your network (labels)
GO.0007155	cell adhesion	6	0.00741	ENSP00000311113,ENSP00000316543,ENSP00000344456,ENSP00000361423,ENSP00000370330,ENSP00000374409	ABL1,CTNNB1,ERBB2IP,JUP,PKP4,RAPH1										5033	Nicotine addiction	8	1.04e-18	ENSP00000023897,ENSP00000264318,ENSP00000274547,ENSP00000299267,ENSP00000335592,ENSP00000348897,ENSP00000367848,ENSP00000410732	GABRA1,GABRA2,GABRA4,GABRA5,GABRB2,GABRB3,GABRD,GABRG2
GO.0071681	cellular response to indole-3-methanol	2	0.00741	ENSP00000311113,ENSP00000344456	CTNNB1,JUP										4727	GABAergic synapse	8	3.29e-16	ENSP00000023897,ENSP00000264318,ENSP00000274547,ENSP00000299267,ENSP00000335592,ENSP00000348897,ENSP00000367848,ENSP00000410732	GABRA1,GABRA2,GABRA4,GABRA5,GABRB2,GABRB3,GABRD,GABRG2
GO.0044700	single organism signaling	9	0.014	ENSP00000262013,ENSP00000275364,ENSP00000311113,ENSP00000316543,ENSP00000344456,ENSP00000355809,ENSP00000370330,ENSP00000374409,ENSP00000400717	CTNNB1,ENAH,ERBB2IP,GNA12,GNA13,JUP,PKP4,RAPH1,SPAG9										5032	Morphine addiction	8	3.29e-16	ENSP00000023897,ENSP00000264318,ENSP00000274547,ENSP00000299267,ENSP00000335592,ENSP00000348897,ENSP00000367848,ENSP00000410732	GABRA1,GABRA2,GABRA4,GABRA5,GABRB2,GABRB3,GABRD,GABRG2
GO.0051149	positive regulation of muscle cell differentiation	3	0.014	ENSP00000262013,ENSP00000344456,ENSP00000361423	ABL1,CTNNB1,SPAG9										4723	Retrograde endocannabinoid signaling	8	5.59e-16	ENSP00000023897,ENSP00000264318,ENSP00000274547,ENSP00000299267,ENSP00000335592,ENSP00000348897,ENSP00000367848,ENSP00000410732	GABRA1,GABRA2,GABRA4,GABRA5,GABRB2,GABRB3,GABRD,GABRG2
GO.0051270	regulation of cellular component movement	5	0.014	ENSP00000262013,ENSP00000275364,ENSP00000311113,ENSP00000361423,ENSP00000400717	ABL1,GNA12,GNA13,JUP,SPAG9										4080	Neuroactive ligand-receptor interaction	9	5.84e-15	ENSP00000023897,ENSP00000264318,ENSP00000264428,ENSP00000274547,ENSP00000299267,ENSP00000335592,ENSP00000348897,ENSP00000367848,ENSP00000410732	GABRA1,GABRA2,GABRA4,GABRA5,GABRB2,GABRB3,GABRD,GABRG2,GLRB
KEGG															16-Synaptic Reuptake
pathway ID	pathway description	observed gene count	false discovery rate	matching proteins in your network (IDs)	matching proteins in your network (labels)										GO Biological Process
4730	Long-term depression	2	0.0301	ENSP00000275364,ENSP00000400717	GNA12,GNA13										pathway ID	pathway description	observed gene count	false discovery rate	matching proteins in your network (IDs)	matching proteins in your network (labels)
4810	Regulation of actin cytoskeleton	3	0.0301	ENSP00000275364,ENSP00000355809,ENSP00000400717	ENAH,GNA12,GNA13										GO.0036465	synaptic vesicle recycling	5	3.9e-09	ENSP00000244458,ENSP00000273047,ENSP00000356236,ENSP00000369981,ENSP00000370719	ITSN1,PACSIN1,RAB5A,SH3GL2,SYT2
5130	Pathogenic Escherichia coli infection	2	0.0301	ENSP00000344456,ENSP00000361423	ABL1,CTNNB1										GO.0006897	endocytosis	8	2.14e-08	ENSP00000244458,ENSP00000271234,ENSP00000273047,ENSP00000356236,ENSP00000367220,ENSP00000369981,ENSP00000370719,ENSP00000409581	ACTR2,ARRB1,FNBP1L,ITSN1,PACSIN1,RAB5A,SH3GL2,SYT2
5200	Pathways in cancer	3	0.0301	ENSP00000311113,ENSP00000344456,ENSP00000361423	ABL1,CTNNB1,JUP										GO.0048488	synaptic vesicle endocytosis	4	3.07e-07	ENSP00000244458,ENSP00000356236,ENSP00000369981,ENSP00000370719	ITSN1,PACSIN1,SH3GL2,SYT2
5412	Arrhythmogenic right ventricular cardiomyopathy (ARVC)	2	0.0318	ENSP00000311113,ENSP00000344456	CTNNB1,JUP										GO.0051650	establishment of vesicle localization	6	3.07e-07	ENSP00000244458,ENSP00000271234,ENSP00000273047,ENSP00000356236,ENSP00000369981,ENSP00000370719	FNBP1L,ITSN1,PACSIN1,RAB5A,SH3GL2,SYT2
															GO.0097479	synaptic vesicle localization	5	1.19e-06	ENSP00000244458,ENSP00000273047,ENSP00000356236,ENSP00000369981,ENSP00000370719	ITSN1,PACSIN1,RAB5A,SH3GL2,SYT2
19-G-Protein Coupled Receptor Signaling
GO Biological Process															KEGG
pathway ID	pathway description	observed gene count	false discovery rate	matching proteins in your network (IDs)	matching proteins in your network (labels)										pathway ID	pathway description	observed gene count	false discovery rate	matching proteins in your network (IDs)	matching proteins in your network (labels)
GO.0007186	G-protein coupled receptor signaling pathway	10	2.97e-06	ENSP00000248564,ENSP00000272644,ENSP00000272928,ENSP00000351605,ENSP00000354607,ENSP00000355627,ENSP00000356429,ENSP00000358867,ENSP00000360021,ENSP00000379514	ADCYAP1R1,AGT,CXCR7,FZD5,FZD6,GNAI3,GNG11,GNG12,GPR17,RGS1										4144	Endocytosis	3	0.0267	ENSP00000273047,ENSP00000369981,ENSP00000409581	ARRB1,RAB5A,SH3GL2
GO.0060070	canonical Wnt signaling pathway	4	0.00249	ENSP00000261349,ENSP00000274063,ENSP00000351605,ENSP00000354607	FZD5,FZD6,LRP6,SFRP2
GO.0071310	cellular response to organic substance	9	0.00249	ENSP00000232564,ENSP00000248564,ENSP00000257497,ENSP00000261349,ENSP00000272644,ENSP00000272928,ENSP00000360021,ENSP00000379514,ENSP00000386884	ADCYAP1R1,ANXA1,CXCR4,CXCR7,GNB4,GNG11,GNG12,GPR17,LRP6										17-Potassium Transport
GO.0007267	cell-cell signaling	7	0.00288	ENSP00000257497,ENSP00000261349,ENSP00000274063,ENSP00000354607,ENSP00000355627,ENSP00000358867,ENSP00000360021	AGT,ANXA1,FZD5,GNAI3,GNG12,LRP6,SFRP2										GO Biological Process
GO.0007399	nervous system development	9	0.00288	ENSP00000232564,ENSP00000257497,ENSP00000261349,ENSP00000274063,ENSP00000351605,ENSP00000354607,ENSP00000355627,ENSP00000360021,ENSP00000386884	AGT,ANXA1,CXCR4,FZD5,FZD6,GNB4,GNG12,LRP6,SFRP2										pathway ID	pathway description	observed gene count	false discovery rate	matching proteins in your network (IDs)	matching proteins in your network (labels)
															GO.0007268	synaptic transmission	8	1.17e-08	ENSP00000287042,ENSP00000295082,ENSP00000297404,ENSP00000314520,ENSP00000328511,ENSP00000360806,ENSP00000367323,ENSP00000371985	KCNA1,KCNA2,KCNA4,KCNAB2,KCNB1,KCNF1,KCNS2,KCNV1
KEGG															GO.0051260	protein homooligomerization	7	1.17e-08	ENSP00000287042,ENSP00000295082,ENSP00000297404,ENSP00000314520,ENSP00000328511,ENSP00000360806,ENSP00000371985	KCNA1,KCNA2,KCNA4,KCNB1,KCNF1,KCNS2,KCNV1
pathway ID	pathway description	observed gene count	false discovery rate	matching proteins in your network (IDs)	matching proteins in your network (labels)										GO.0071805	potassium ion transmembrane transport	6	1.75e-08	ENSP00000287042,ENSP00000295082,ENSP00000297404,ENSP00000328511,ENSP00000367323,ENSP00000371985	KCNA1,KCNA4,KCNAB2,KCNF1,KCNS2,KCNV1
4713	Circadian entrainment	5	1.23e-06	ENSP00000232564,ENSP00000248564,ENSP00000358867,ENSP00000360021,ENSP00000379514	ADCYAP1R1,GNAI3,GNB4,GNG11,GNG12										GO.0070271	protein complex biogenesis	7	1.23e-05	ENSP00000287042,ENSP00000295082,ENSP00000297404,ENSP00000314520,ENSP00000328511,ENSP00000360806,ENSP00000371985	KCNA1,KCNA2,KCNA4,KCNB1,KCNF1,KCNS2,KCNV1
4062	Chemokine signaling pathway	5	1.89e-05	ENSP00000232564,ENSP00000248564,ENSP00000358867,ENSP00000360021,ENSP00000386884	CXCR4,GNAI3,GNB4,GNG11,GNG12										GO.0022607	cellular component assembly	8	1.58e-05	ENSP00000264638,ENSP00000287042,ENSP00000295082,ENSP00000297404,ENSP00000314520,ENSP00000328511,ENSP00000360806,ENSP00000371985	CNTNAP1,KCNA1,KCNA2,KCNA4,KCNB1,KCNF1,KCNS2,KCNV1
4727	GABAergic synapse	4	2.88e-05	ENSP00000232564,ENSP00000248564,ENSP00000358867,ENSP00000360021	GNAI3,GNB4,GNG11,GNG12
5032	Morphine addiction	4	2.88e-05	ENSP00000232564,ENSP00000248564,ENSP00000358867,ENSP00000360021	GNAI3,GNB4,GNG11,GNG12										18-Axon Guidance and Development
4723	Retrograde endocannabinoid signaling	4	3.43e-05	ENSP00000232564,ENSP00000248564,ENSP00000358867,ENSP00000360021	GNAI3,GNB4,GNG11,GNG12										GO Biological Process
															pathway ID	pathway description	observed gene count	false discovery rate	matching proteins in your network (IDs)	matching proteins in your network (labels)
20-NF-Kappa B Signaling															GO.0007411	axon guidance	6	3.81e-06	ENSP00000280772,ENSP00000311489,ENSP00000349588,ENSP00000352035,ENSP00000373648,ENSP00000374372	ANK2,ANK3,KCNQ2,KCNQ3,SPTB,SPTBN2
GO Biological Process															GO.0034765	regulation of ion transmembrane transport	6	3.81e-06	ENSP00000280772,ENSP00000306497,ENSP00000345055,ENSP00000349588,ENSP00000352035,ENSP00000373648	ANK2,ANK3,KCNJ4,KCNQ2,KCNQ3,KCNQ5
pathway ID	pathway description	observed gene count	false discovery rate	matching proteins in your network (IDs)	matching proteins in your network (labels)										GO.0007409	axonogenesis	6	9.18e-06	ENSP00000280772,ENSP00000311489,ENSP00000349588,ENSP00000352035,ENSP00000373648,ENSP00000374372	ANK2,ANK3,KCNQ2,KCNQ3,SPTB,SPTBN2
GO.0042981	regulation of apoptotic process	7	0.000266	ENSP00000220166,ENSP00000227758,ENSP00000312455,ENSP00000314132,ENSP00000314363,ENSP00000358022,ENSP00000376500	BIRC2,BOK,CFLAR,CTSH,MAP4K4,MCL1,TRAF3										GO.0061564	axon development	6	9.64e-06	ENSP00000280772,ENSP00000311489,ENSP00000349588,ENSP00000352035,ENSP00000373648,ENSP00000374372	ANK2,ANK3,KCNQ2,KCNQ3,SPTB,SPTBN2
GO.0097191	extrinsic apoptotic signaling pathway	4	0.000266	ENSP00000312455,ENSP00000314132,ENSP00000329623,ENSP00000358022	BCL2,BOK,CFLAR,MCL1										GO.0048667	cell morphogenesis involved in neuron differentiation	6	1.07e-05	ENSP00000280772,ENSP00000311489,ENSP00000349588,ENSP00000352035,ENSP00000373648,ENSP00000374372	ANK2,ANK3,KCNQ2,KCNQ3,SPTB,SPTBN2
GO.0043065	positive regulation of apoptotic process	5	0.0011	ENSP00000220166,ENSP00000312455,ENSP00000314132,ENSP00000329623,ENSP00000358022	BCL2,BOK,CFLAR,CTSH,MCL1
GO.0043281	regulation of cysteine-type endopeptidase activity involved in apoptotic process	4	0.0011	ENSP00000220166,ENSP00000227758,ENSP00000312455,ENSP00000314132	BIRC2,BOK,CFLAR,CTSH										pathway ID	pathway description	observed gene count	false discovery rate	matching proteins in your network (IDs)	matching proteins in your network (labels)
GO.0097192	extrinsic apoptotic signaling pathway in absence of ligand	3	0.0011	ENSP00000314132,ENSP00000329623,ENSP00000358022	BCL2,BOK,MCL1										4725	Cholinergic synapse	4	1.4e-05	ENSP00000306497,ENSP00000345055,ENSP00000352035,ENSP00000373648	KCNJ4,KCNQ2,KCNQ3,KCNQ5
KEGG															19-Neurotransmitter Transport
pathway ID	pathway description	observed gene count	false discovery rate	matching proteins in your network (IDs)	matching proteins in your network (labels)										GO Biological Process
4064	NF-kappa B signaling pathway	4	6.34e-06	ENSP00000227758,ENSP00000312455,ENSP00000329623,ENSP00000376500	BCL2,BIRC2,CFLAR,TRAF3										pathway ID	pathway description	observed gene count	false discovery rate	matching proteins in your network (IDs)	matching proteins in your network (labels)
4210	Apoptosis	3	0.000353	ENSP00000227758,ENSP00000312455,ENSP00000329623	BCL2,BIRC2,CFLAR										GO.0001505	regulation of neurotransmitter levels	6	5.93e-07	ENSP00000221459,ENSP00000259271,ENSP00000272198,ENSP00000307900,ENSP00000350928,ENSP00000354111	DNAJC5,GAD1,GAD2,GLUL,LIN7B,PPFIA4
5222	Small cell lung cancer	3	0.000353	ENSP00000227758,ENSP00000329623,ENSP00000376500	BCL2,BIRC2,TRAF3										GO.0006836	neurotransmitter transport	6	5.93e-07	ENSP00000221459,ENSP00000259271,ENSP00000272198,ENSP00000307900,ENSP00000350928,ENSP00000354111	DNAJC5,GAD1,GAD2,GLUL,LIN7B,PPFIA4
4668	TNF signaling pathway	3	0.000533	ENSP00000227758,ENSP00000312455,ENSP00000376500	BIRC2,CFLAR,TRAF3										GO.0007269	neurotransmitter secretion	5	1.45e-05	ENSP00000221459,ENSP00000259271,ENSP00000272198,ENSP00000350928,ENSP00000354111	DNAJC5,GAD1,GAD2,LIN7B,PPFIA4
5200	Pathways in cancer	3	0.0115	ENSP00000227758,ENSP00000329623,ENSP00000376500	BCL2,BIRC2,TRAF3										GO.0006538	glutamate catabolic process	3	1.49e-05	ENSP00000259271,ENSP00000307900,ENSP00000350928	GAD1,GAD2,GLUL
															GO.0007268	synaptic transmission	7	1.49e-05	ENSP00000221459,ENSP00000259271,ENSP00000272198,ENSP00000296452,ENSP00000307900,ENSP00000350928,ENSP00000354111	BSN,DNAJC5,GAD1,GAD2,GLUL,LIN7B,PPFIA4
21-Cell-Cell Adhesion
GO Biological Process															KEGG
pathway ID	pathway description	observed gene count	false discovery rate	matching proteins in your network (IDs)	matching proteins in your network (labels)										pathway ID	pathway description	observed gene count	false discovery rate	matching proteins in your network (IDs)	matching proteins in your network (labels)
GO.0007043	cell-cell junction assembly	3	0.0145	ENSP00000281537,ENSP00000289779,ENSP00000408695	F11R,PRKCA,TJP1										250	Alanine, aspartate and glutamate metabolism	3	0.000143	ENSP00000259271,ENSP00000307900,ENSP00000350928	GAD1,GAD2,GLUL
GO.0090557	establishment of endothelial intestinal barrier	2	0.0145	ENSP00000281537,ENSP00000289779	F11R,TJP1										410	beta-Alanine metabolism	3	0.000143	ENSP00000259271,ENSP00000350928,ENSP00000366156	GAD1,GAD2,SRM
															330	Arginine and proline metabolism	3	0.000424	ENSP00000261783,ENSP00000307900,ENSP00000366156	ARG2,GLUL,SRM
KEGG															430	Taurine and hypotaurine metabolism	2	0.000813	ENSP00000259271,ENSP00000350928	GAD1,GAD2
pathway ID	pathway description	observed gene count	false discovery rate	matching proteins in your network (IDs)	matching proteins in your network (labels)										4727	GABAergic synapse	3	0.000813	ENSP00000259271,ENSP00000307900,ENSP00000350928	GAD1,GAD2,GLUL
4530	Tight junction	7	8.63e-14	ENSP00000228251,ENSP00000281537,ENSP00000289779,ENSP00000364361,ENSP00000370410,ENSP00000408695,ENSP00000420419	CSDA,F11R,JAM2,MPDZ,PRKCA,TJP1,ZAK
5120	Epithelial cell signaling in Helicobacter pylori infection	3	0.000152	ENSP00000281537,ENSP00000289779,ENSP00000420419	F11R,JAM2,TJP1										20-G2/M Cell Cycle Transition
4670	Leukocyte transendothelial migration	3	0.000541	ENSP00000289779,ENSP00000408695,ENSP00000420419	F11R,JAM2,PRKCA										GO Biological Process
5110	Vibrio cholerae infection	2	0.00911	ENSP00000281537,ENSP00000408695	PRKCA,TJP1										pathway ID	pathway description	observed gene count	false discovery rate	matching proteins in your network (IDs)	matching proteins in your network (labels)
4540	Gap junction	2	0.0193	ENSP00000281537,ENSP00000408695	PRKCA,TJP1										GO.0000086	G2/M transition of mitotic cell cycle	3	0.0143	ENSP00000352572,ENSP00000358921,ENSP00000380378	ACTR1A,PAFAH1B1,PCNT
4514	Cell adhesion molecules (CAMs)	2	0.0431	ENSP00000289779,ENSP00000420419	F11R,JAM2										GO.0007017	microtubule-based process	4	0.0143	ENSP00000254286,ENSP00000262891,ENSP00000352572,ENSP00000380378	ACTR10,MARK4,PAFAH1B1,PCNT
															21-Cytokine Signaling and Protein Transport
22-Fatty Acid Metabolism															GO Biological Process
GO Biological Process															pathway ID	pathway description	observed gene count	false discovery rate	matching proteins in your network (IDs)	matching proteins in your network (labels)
pathway ID	pathway description	observed gene count	false discovery rate	matching proteins in your network (IDs)	matching proteins in your network (labels)										GO.1903215	negative regulation of protein targeting to mitochondrion	2	0.00692	ENSP00000287322,ENSP00000298910	BAG4,LRRK2
GO.0006631	fatty acid metabolic process	6	6.45e-08	ENSP00000258873,ENSP00000281455,ENSP00000333664,ENSP00000349297,ENSP00000359233,ENSP00000360577	ABCD3,ACAA1,ACADVL,ACSBG1,ACSL1,ECHDC2
GO.0000038	very long-chain fatty acid metabolic process	3	7.9e-05	ENSP00000258873,ENSP00000333664,ENSP00000359233	ABCD3,ACAA1,ACSBG1
GO.0006635	fatty acid beta-oxidation	3	0.000325	ENSP00000333664,ENSP00000349297,ENSP00000359233	ABCD3,ACAA1,ACADVL
GO.0001676	long-chain fatty acid metabolic process	3	0.00177	ENSP00000258873,ENSP00000281455,ENSP00000333664	ACAA1,ACSBG1,ACSL1
GO.0036109	alpha-linolenic acid metabolic process	2	0.00453	ENSP00000281455,ENSP00000333664	ACAA1,ACSL1
KEGG
pathway ID	pathway description	observed gene count	false discovery rate	matching proteins in your network (IDs)	matching proteins in your network (labels)
71	Fatty acid degradation	4	5.72e-08	ENSP00000258873,ENSP00000281455,ENSP00000333664,ENSP00000349297	ACAA1,ACADVL,ACSBG1,ACSL1
1212	Fatty acid metabolism	4	5.72e-08	ENSP00000258873,ENSP00000281455,ENSP00000333664,ENSP00000349297	ACAA1,ACADVL,ACSBG1,ACSL1
3320	PPAR signaling pathway	3	6.67e-05	ENSP00000258873,ENSP00000281455,ENSP00000333664	ACAA1,ACSBG1,ACSL1
1100	Metabolic pathways	4	0.00902	ENSP00000258873,ENSP00000281455,ENSP00000333664,ENSP00000349297	ACAA1,ACADVL,ACSBG1,ACSL1
4920	Adipocytokine signaling pathway	2	0.00902	ENSP00000258873,ENSP00000281455	ACSBG1,ACSL1
23-Lipid Transport and Storage
GO Biological Process
pathway ID	pathway description	observed gene count	false discovery rate	matching proteins in your network (IDs)	matching proteins in your network (labels)
GO.0010885	regulation of cholesterol storage	3	9.66e-05	ENSP00000262735,ENSP00000308165,ENSP00000363868	ABCA1,CD36,PPARA
GO.0071396	cellular response to lipid	5	0.000187	ENSP00000262735,ENSP00000308165,ENSP00000325819,ENSP00000363868,ENSP00000419692	ABCA1,CD36,NR2F1,PPARA,RXRA
GO.0010743	regulation of macrophage derived foam cell differentiation	3	0.000368	ENSP00000262735,ENSP00000308165,ENSP00000363868	ABCA1,CD36,PPARA
GO.0006869	lipid transport	4	0.00134	ENSP00000262735,ENSP00000308165,ENSP00000363868,ENSP00000419692	ABCA1,CD36,PPARA,RXRA
GO.0010876	lipid localization	4	0.00148	ENSP00000262735,ENSP00000308165,ENSP00000363868,ENSP00000419692	ABCA1,CD36,PPARA,RXRA
KEGG
pathway ID	pathway description	observed gene count	false discovery rate	matching proteins in your network (IDs)	matching proteins in your network (labels)
3320	PPAR signaling pathway	4	1.11e-06	ENSP00000262735,ENSP00000301455,ENSP00000308165,ENSP00000419692	ANGPTL4,CD36,PPARA,RXRA
4920	Adipocytokine signaling pathway	3	0.000167	ENSP00000262735,ENSP00000308165,ENSP00000419692	CD36,PPARA,RXRA
4975	Fat digestion and absorption	2	0.00707	ENSP00000308165,ENSP00000363868	ABCA1,CD36
