# Supplementary material for: Downregulation of glial genes involved in synaptic function mitigates Huntington's disease pathogenesis
Source: eLife. 2021 Apr 19;10:e64564. doi: 10.7554/eLife.64564 (PMC8149125; doi:10.7554/eLife.64564)
Supplement: Supplementary file 4. [file elife-64564-supp4.xlsx]

## Sheet: Sheet1
Stock ID	Repository	Effect of Allele	Human Gene	Fly Gene	Time+Genotype	Time*Genotype
20232	BDSC	Loss of function	AGAP2	CenG1A	7.30883e-10	0.173402
44301	BDSC	Loss of function	AGAP2	CenG1A	3.24865e-12	4.08207e-05
57970	BDSC	Loss of function	AGAP2	CenG1A	9.198e-12	1.99873e-07
59465	BDSC	Loss of function	AGAP2	CenG1A	2.31475e-07	0.0173893
61716	BDSC	Loss of function	AGAP2	CenG1A	5.81005e-06	0.000320989
10366	BDSC	Loss of function	DLGAP2/DLGAP3/DLGAP4	vlc	8.82946e-18	9.81428e-16
9099	BDSC	Loss of function	EPB41/EPB41L1/EPB41L2	cora	5.30919e-11	0.00540278
52232	BDSC	Loss of function	EPB41/EPB41L1/EPB41L2	cora	3.54001e-15	5.46234e-05
11144R-3	NIG	Knockdown	GRM1/GRM5	mGluR	8.21259e-12	5.4851e-05
1793	VDRC	Knockdown	GRM1/GRM5	mGluR	4.58717e-05	0.244225
34116	BDSC	Loss of function	GRM1/GRM5	mtt	1.97712e-08	0.449707
330081	VDRC	Knockdown	GRM1/GRM5	mtt	1.01657e-05	0.0731688
44822	BDSC	Loss of function	GRM1/GRM5	mtt	1.75526e-06	6.2365e-14
9564	BDSC	Loss of function	HOMER1	homer	1.18902e-16	1.02942e-13
100271	VDRC	Knockdown	HOMER1	homer	9.30498e-10	0.00875023
41393	BDSC	Loss of function	LRRTM1/LRRTM2	caps	2.08788e-19	0.0171185
34298	BDSC	Loss of function	LRRTM1/LRRTM2	caps	8.09539e-13	1.3475e-08
4550	BDSC	Loss of function	LRRTM1/LRRTM2	trn	3.17115e-06	8.5822e-07
22539	BDSC	Loss of function	NLG3/NLG4X	Glt	2.12656e-07	2.67041e-06
102216	VDRC	Knockdown	NLGN3/NLGN4X	CG30095	0.000940019	0.0180871
44050	VDRC	Knockdown	NLGN3/NLGN4X	CG30095	2.52028e-06	0.00164723
16592	BDSC	Loss of function	NLGN3/NLGN4X	CG9287	5.97909e-12	1.77567e-06
59786	BDSC	Loss of function	NLGN3/NLGN4X	Nlg1	5.04595e-13	0.0104484
78859	BDSC	Loss of function	NLGN3/NLGN4X	Nlg1	1.68915e-09	5.01033e-06
28331	BDSC	Loss of function	NLGN3/NLGN4X	Nlg2	0.000938043	3.66803e-06
44765	BDSC	Loss of function	NLGN3/NLGN4X	Nlg2	1.61045e-13	0.000447798
58509	BDSC	Loss of function	NLGN3/NLGN4X	Nlg3	4.80914e-15	0.00015925
18367	BDSC	Loss of function	NLGN3/NLGN4X	Nlg3	2.96594e-19	2.02171e-06
31005	BDSC	Loss of function	NLGN3/NLGN4X	Nlg3	5.0225e-14	0.00430247
21977	BDSC	Loss of function	NRXN1/NRXN2/NRXN3	nrx-1	9.129e-14	0.00123675
36326	VDRC	Knockdown	NRXN1/NRXN2/NRXN3	nrx-1	0.0173911	0.000102963
61696	BDSC	Loss of function	NRXN1/NRXN2/NRXN3	nrx-1	6.77897e-07	2.89225e-07
32408	BDSC	Loss of function	NRXN1/NRXN2/NRXN3	nrx-1	2.59694e-09	2.35416e-12
55467	BDSC	Loss of function	NRXN1/NRXN2/NRXN3	nrx-1	1.92473e-10	6.83915e-05
56624	BDSC	Loss of function	SLTRK5	kek5	1.56717e-11	0.000302829
51204	BDSC	Loss of function	SLTRK5	kek5	3.27581e-10	3.11989e-06
34407	BDSC	Loss of function	SLTRK5	kek6	2.26805e-16	6.87452e-07
27293	BDSC	Loss of function	SYT13	Sytbeta	0.00175278	9.64148e-06
106559	VDRC	Knockdown	SYT13	Sytbeta	8.4462e-12	2.39812e-06
40764	BDSC	Loss of function	SYT13	Sytbeta	5.60366e-18	1.05656e-06
23394	BDSC	Loss of function	SYT7	Syt7	7.21021e-05	0.00503142
24988	VDRC	Knockdown	SYT7	Syt7	7.96796e-05	1.15184e-07
60791	BDSC	Loss of function	SYT7	Syt7	9.89239e-07	8.84281e-05
