# Supplementary material for: Downregulation of glial genes involved in synaptic function mitigates Huntington's disease pathogenesis
Source: eLife. 2021 Apr 19;10:e64564. doi: 10.7554/eLife.64564 (PMC8149125; doi:10.7554/eLife.64564)
Supplement: Supplementary file 5. [file elife-64564-supp5.xlsx]

## Sheet: Sheet2
Human Gene ID	Human Symbol	FlyBaseID	Fly Symbol	Weighted DIOPT Score	DIOPT Rank	Repository	Effect	Stock	Neuronal mHTT	Glial mHTT
19	ABCA1	FBgn0083956	CG34120	3.85	moderate	BDSC	Duplication	30778	Non-modifier	Lethal
19	ABCA1	FBgn0083956	CG34120	3.85	moderate	VDRC	Knockdown	105654	Non-modifier	Enhancer
19	ABCA1	FBgn0036747	CG6052	3.82	moderate	VDRC	Knockdown	5310	Suppressor	Non-modifier
25	ABL1	FBgn0000017	Abl	7.98	moderate	VDRC	Knockdown	2897	Suppressor	Suppressor
25	ABL1	FBgn0000017	Abl	7.98	moderate	BDSC	Overexpression	8567	Suppressor	Suppressor
25	ABL1	FBgn0000017	Abl	7.98	moderate	Genetivision	Duplication	P9-B8	Non-modifier	Non-modifier
84448	ABLIM2	FBgn0051352	Unc-115a	11.79	high	VDRC	Knockdown	106405	Enhancer	Enhancer
30	ACAA1	FBgn0029969	CG10932	1.01	low	VDRC	Knockdown	16099	Enhancer	Enhancer
30	ACAA1	FBgn0029969	CG10932	1.01	low	VDRC	Knockdown	107027	Suppressor	Non-modifier
30	ACAA1	FBgn0029969	CG10932	1.01	low	BDSC	Duplication	32309	Non-modifier	Suppressor
37	ACADVL	FBgn0034432	CG7461	14.75	high	Genetivision	Duplication	P15-E3	Suppressor	Suppressor
37	ACADVL	FBgn0034432	CG7461	14.75	high	NIG	Knockdown	7461R-1	Non-modifier	Non-modifier
37	ACADVL	FBgn0034432	CG7461	14.75	high	NIG	Knockdown	7461R-4	Non-modifier	Non-modifier
2180	ACSL1	FBgn0036821	CG3961	12.65	high	Genetivision	Duplication	P9-C5	Non-modifier	Non-modifier
2180	ACSL1	FBgn0036821	CG3961	12.65	high	VDRC	Knockdown	37305	Non-modifier	Non-modifier
60	ACTB	FBgn0000043	Act42A	10.96	high	VDRC	Knockdown	104731	Wing Phenotype	Suppressor
60	ACTB	FBgn0000042	Act5C	10.96	high	VDRC	Knockdown	101438	Enhancer	Non-modifier
60	ACTB	FBgn0000042	Act5C	10.96	high	BDSC	Loss of Function	11825	Enhancer	Lethal
60	ACTB	FBgn0000042	Act5C	10.96	high	BDSC	Overexpression	7309	Non-modifier	Non-modifier
88	ACTN2	FBgn0000667	Actn	13.75	high	VDRC	Knockdown	7760	Enhancer	Enhancer
88	ACTN2	FBgn0000667	Actn	13.75	high	VDRC	Knockdown	7761	Enhancer	Enhancer
10097	ACTR2	FBgn0011742	Arp2	13.8	high	VDRC	Knockdown	29944	Enhancer	Enhancer
10097	ACTR2	FBgn0011742	Arp2	13.8	high	VDRC	Knockdown	101999	Non-modifier	Enhancer
10096	ACTR3	FBgn0262716	arp3	13.8	high	BDSC	Duplication	39722	Non-modifier	Lethal
10096	ACTR3	FBgn0262716	arp3	13.8	high	Genetivision	Duplication	P10-C8	Suppressor	Suppressor
107	ADCY1	FBgn0003301	rut	13.74	high	VDRC	Knockdown	5569	Non-modifier	Non-modifier
107	ADCY1	FBgn0003301	rut	13.74	high	VDRC	Knockdown	101759	Suppressor	Non-modifier
109	ADCY3	FBgn0023416	Ac3	10.88	high	VDRC	Knockdown	33217	Suppressor	Enhancer
111	ADCY5	FBgn0263131	CG43373	10.89	high	VDRC	Knockdown	23386	Suppressor	Suppressor
111	ADCY5	FBgn0263131	CG43373	10.89	high	VDRC	Knockdown	102057	Suppressor	Suppressor
115	ADCY9	FBgn0022710	Ac13E	12.84	high	VDRC	Knockdown	110750	Non-modifier	Non-modifier
115	ADCY9	FBgn0022710	Ac13E	12.84	high	NIG	Knockdown	9210R-2	Suppressor	Non-modifier
183	AGT	FBgn0039795	Spn100A	1.1	low	VDRC	Knockdown	100398	Enhancer	Non-modifier
223	ALDH9A1	FBgn0012036	Aldh	1.91	moderate	Genetivision	Duplication	P3-54	Suppressor	Non-modifier
223	ALDH9A1	FBgn0051075	CG31075	1.91	moderate	Genetivision	Duplication	P15-E2	Suppressor	Non-modifier
223	ALDH9A1	FBgn0051075	CG31075	1.91	moderate	VDRC	Knockdown	25676	Suppressor	Non-modifier
223	ALDH9A1	FBgn0032945	CG8665	1.91	moderate	Genetivision	Duplication	P7-H4	Suppressor	Non-modifier
284	ANGPT1	FBgn0087011	CG41520	6.88	high	Genetivision	Duplication	P3-7	Suppressor	Suppressor
301	ANXA1	FBgn0000084	AnxB10	1.91	moderate	BDSC	Duplication	30775	Suppressor	Suppressor
301	ANXA1	FBgn0000084	AnxB10	1.91	moderate	BDSC	Overexpression	19193	Suppressor	Suppressor
301	ANXA1	FBgn0030749	AnxB11	1.91	moderate	VDRC	Knockdown	29693	Suppressor	Non-modifier
397	ARHGDIB	FBgn0036921	RhoGDI	11.7	moderate	Genetivision	Duplication	P11-D4	Non-modifier	Non-modifier
397	ARHGDIB	FBgn0036921	RhoGDI	11.7	moderate	VDRC	Knockdown	46154	Lethal	Enhancer
408	ARRB1	FBgn0040206	krz	13.8	high	VDRC	Knockdown	41559	Suppressor	Non-modifier
408	ARRB1	FBgn0040206	krz	13.8	high	VDRC	Knockdown	103756	Enhancer	Non-modifier
467	ATF3	FBgn0028550	Atf3	5.94	high	BDSC	Duplication	32289	Suppressor	Suppressor
476	ATP1A1	FBgn0002921	Atpalpha	12.65	high	VDRC	Knockdown	12330	Lethal	Lethal
476	ATP1A1	FBgn0002921	Atpalpha	12.65	high	VDRC	Knockdown	100619	Lethal	Lethal
476	ATP1A1	FBgn0002921	Atpalpha	12.65	high	NIG	Knockdown	5670R-1	Lethal	Lethal
491	ATP2B2	FBgn0259214	PMCA	11.87	high	VDRC	Knockdown	30203	Non-modifier	Non-modifier
9530	BAG4	FBgn0086708	stv	4.96	moderate	VDRC	Knockdown	34408	Suppressor	Lethal
9530	BAG4	FBgn0086708	stv	4.96	moderate	VDRC	Knockdown	34409	Non-modifier	Lethal
63827	BCAN	FBgn0035199	tfc	2.98	high	Genetivision	Duplication	P9-G1	Non-modifier	Non-modifier
329	BIRC2	FBgn0015247	Diap2	12.79	high	Genetivision	Duplication	P6-B10	Non-modifier	Enhancer
666	BOK	FBgn0040491	buffy	11.88	high	Genetivision	Duplication	32059	Non-modifier	Non-modifier
775	CACNA1C	FBgn0001991	Ca-alpha1D	10.79	moderate	VDRC	Knockdown	51491	Non-modifier	Lethal
775	CACNA1C	FBgn0001991	Ca-alpha1D	10.79	moderate	VDRC	Knockdown	52644	Enhancer	Lethal
776	CACNA1D	FBgn0001991	Ca-alpha1D	12.8	high	VDRC	Knockdown	51491	Non-modifier	Lethal
776	CACNA1D	FBgn0001991	Ca-alpha1D	12.8	high	VDRC	Knockdown	52644	Enhancer	Lethal
777	CACNA1E	FBgn0263111	cac	9.82	moderate	VDRC	Knockdown	104168	Lethal	Enhancer
8912	CACNA1H	FBgn0264386	Ca-alpha1T	8.98	moderate	VDRC	Knockdown	31961	Non-modifier	Non-modifier
8912	CACNA1H	FBgn0264386	Ca-alpha1T	8.98	moderate	BDSC	Loss of Function	19179	Suppressor	Suppressor
9254	CACNA2D2	FBgn0028863	CG4587	3.96	moderate	VDRC	Knockdown	3839	Non-modifier	Non-modifier
801	CALM1	FBgn0000253	Cam	9.86	high	VDRC	Knockdown	28242	Non-modifier	Non-modifier
815	CAMK2A	FBgn0264607	CaMKII	11.77	moderate	VDRC	Knockdown	100265	Enhancer	Non-modifier
815	CAMK2A	FBgn0264607	CaMKII	11.77	moderate	NIG	Knockdown	18069R-1	Suppressor	Non-modifier
816	CAMK2B	FBgn0264607	CaMKII	11.8	moderate	VDRC	Knockdown	100265	Enhancer	Non-modifier
816	CAMK2B	FBgn0264607	CaMKII	11.8	moderate	NIG	Knockdown	18069R-1	Suppressor	Non-modifier
998	CDC42	FBgn0010341	Cdc42	13.8	high	VDRC	Knockdown	100794	Enhancer	Enhancer
998	CDC42	FBgn0010341	Cdc42	13.8	high	VDRC	Knockdown	330192	Enhancer	Non-modifier
998	CDC42	FBgn0010341	Cdc42	13.8	high	BDSC	Loss of Function	6288	Enhancer	Lethal
998	CDC42	FBgn0010341	Cdc42	13.8	high	BDSC	Consitutively Active	4854	Lethal	Lethal
1004	CDH6	FBgn0262018	CadN2	3.01	high	VDRC	Knockdown	36166	Suppressor	Non-modifier
983	CDK1	FBgn0004106	cdk1	12.9	high	BDSC	Loss of Function	6629	Suppressor	Suppressor
983	CDK1	FBgn0004106	cdk1	12.9	high	BDSC	Overexpression	6642	Non-modifier	Suppressor
1020	CDK5	FBgn0013762	Cdk5	13.8	high	VDRC	Knockdown	35855	Enhancer	Non-modifier
1020	CDK5	FBgn0013762	Cdk5	13.8	high	VDRC	Knockdown	104491	Non-modifier	Non-modifier
1073	CFL2	FBgn0030951	CG6873	9.85	high	BDSC	Duplication	33484	Suppressor	Suppressor
1073	CFL2	FBgn0030951	CG6873	9.85	high	NIG	Knockdown	6873R-1	Suppressor	Non-modifier
1073	CFL2	FBgn0030951	CG6873	9.85	high	NIG	Knockdown	6873R-2	Suppressor	Enhancer
1073	CFL2	FBgn0011726	tsr	9.85	high	VDRC	Knockdown	110599	Lethal	Lethal
1073	CFL2	FBgn0011726	tsr	9.85	high	VDRC	Knockdown	29116	Non-modifier	Non-modifier
1073	CFL2	FBgn0011726	tsr	9.85	high	BDSC	Loss of Function	9109	Suppressor	Suppressor
1073	CFL2	FBgn0011726	tsr	9.85	high	BDSC	Overexpression	9234	Non-modifier	Enhancer
1004	CHD6	FBgn0262018	CadN2	3.01	high	VDRC	Knockdown	101659	Suppressor	Non-modifier
1298	COL9A2	FBgn0259244	CG42342	1.01	low	Genetivision	Duplication	P14-G4	Suppressor	Suppressor
1298	COL9A2	FBgn0259244	CG42342	1.01	low	VDRC	Knockdown	102525	Lethal	Non-modifier
1385	CREB1	FBgn0265784	CrebB	9.74	high	VDRC	Knockdown	101512	Suppressor	Non-modifier
1385	CREB1	FBgn0265784	CrebB	9.74	high	BDSC	Duplication	30759	Suppressor	Suppressor
1499	CTNNB1	FBgn0000117	arm	14.75	high	VDRC	Knockdown	7767	Enhancer	Non-modifier
1499	CTNNB1	FBgn0000117	arm	14.75	high	VDRC	Knockdown	107344	Enhancer	Non-modifier
1499	CTNNB1	FBgn0000117	arm	14.75	high	BDSC	Overexpression	4783	Enhancer	Lethal
1499	CTNNB1	FBgn0000117	arm	14.75	high	BDSC	Duplication	30230	Suppressor	Suppressor
1499	CTNNB1	FBgn0000117	arm	14.75	high	NIG	Knockdown	11579R-1	Non-modifier	Enhancer
2017	CTTN	FBgn0025865	cortactin	12.89	high	BDSC	Overexpression	9368	Lethal	Lethal
2017	CTTN	FBgn0025865	cortactin	12.89	high	BDSC	Overexpression	58414	Non-modifier	Suppressor
2017	CTTN	FBgn0025865	cortactin	12.89	high	BDSC	Loss of Function	9367	Suppressor	Non-modifier
2017	CTTN	FBgn0025865	cortactin	12.89	high	VDRC	Knockdown	330320	Non-modifier	Non-modifier
7852	CXCR4	FBgn0036789	AstC-R2	1.01	low	VDRC	Knockdown	106146	Enhancer	Suppressor
7852	CXCR4	FBgn0036789	AstC-R2	1.01	low	Genetivision	Duplication	P11-B10	Suppressor	Suppressor
1630	DCC	FBgn0011592	fra	11.87	moderate	VDRC	Knockdown	6212	Suppressor	Non-modifier
1630	DCC	FBgn0011592	fra	11.87	moderate	BDSC	Overexpression	8814	Non-modifier	Non-modifier
10521	DDX17	FBgn0029979	mahe	6.55	moderate	VDRC	Knockdown	46933	Suppressor	Suppressor
10521	DDX17	FBgn0029979	mahe	6.55	moderate	BDSC	Duplication	32310	Suppressor	Suppressor
10521	DDX17	FBgn0029979	mahe	6.55	moderate	BDSC	Duplication	33489	Suppressor	Non-modifier
84649	DGAT2	FBgn0033214	CG1941	10.79	moderate	VDRC	Knockdown	3997	Non-modifier	Suppressor
84649	DGAT2	FBgn0033214	CG1941	10.79	moderate	VDRC	Knockdown	106800	Non-modifier	Suppressor
84649	DGAT2	FBgn0033214	CG1941	10.79	moderate	VDRC	Knockdown	48583	Non-modifier	Non-modifier
84649	DGAT2	FBgn0033215	CG1942	10.79	moderate	VDRC	Knockdown	107788	Suppressor	Non-modifier
84649	DGAT2	FBgn0033216	CG1946	10.79	moderate	VDRC	Knockdown	33428	Non-modifier	Suppressor
84649	DGAT2	FBgn0033216	CG1946	10.79	moderate	VDRC	Knockdown	108495	Non-modifier	Suppressor
3337	DNAJB1	FBgn0030207	CG2887	5.91	moderate	BDSC	Duplication	38485	Suppressor	Suppressor
3337	DNAJB1	FBgn0052640	CG32640	1	low	BDSC	Duplication	30282	Suppressor	Suppressor
3337	DNAJB1	FBgn0052641	CG32641	1	low	BDSC	Duplication	30282	Suppressor	Suppressor
3337	DNAJB1	FBgn0031322	CG5001	11.7	moderate	VDRC	Knockdown	101532	Non-modifier	Enhancer
3337	DNAJB1	FBgn0031322	CG5001	11.7	moderate	Genetivision	Duplication	P17-A11	Suppressor	Suppressor
3337	DNAJB1	FBgn0263106	DnaJ-1	12.8	moderate	Genetivision	Duplication	P12-C12	Suppressor	Suppressor
3337	DNAJB1	FBgn0263106	DnaJ-1	12.8	moderate	BDSC	Duplication	30553	Suppressor	Non-modifier
3337	DNAJB1	FBgn0263106	DnaJ-1	12.8	moderate	VDRC	Knockdown	31271	Enhancer	Suppressor
2989	DOCK3	FBgn0015513	mbc	4.84	moderate	VDRC	Knockdown	16044	Non-modifier	Lethal
1994	ELAVL1	FBgn0086675	fne	11.82	moderate	VDRC	Knockdown	101508	Lethal	Lethal
1994	ELAVL1	FBgn0086675	fne	11.82	moderate	BDSC	Duplication	30379	Suppressor	Suppressor
1994	ELAVL1	FBgn0086675	fne	11.82	moderate	BDSC	Overexpression	6897	Lethal	Lethal
2002	ELK1	FBgn0003118	pnt	1.91	moderate	VDRC	Knockdown	105390	Enhancer	Lethal
6785	ELOVL4	FBgn0036128	Elo68beta	10.87	high	VDRC	Knockdown	103506	Non-modifier	Non-modifier
55740	ENAH	FBgn0000578	ena	8.88	high	VDRC	Knockdown	106484	Enhancer	Enhancer
55740	ENAH	FBgn0000578	ena	8.88	high	BDSC	Overexpression	66169	Suppressor	Suppressor
55740	ENAH	FBgn0000578	ena	8.88	high	BDSC	Overexpression	58744	Non-modifier	Suppressor
55740	ENAH	FBgn0000578	ena	8.88	high	BDSC	Overexpression	29959	Non-modifier	Suppressor
2035	EPB41	FBgn0010434	cora	5.94	moderate	VDRC	Knockdown	106876	Suppressor	Enhancer
2043	EPHA4	FBgn0025936	eph	10.91	moderate	VDRC	Knockdown	110448	Non-modifier	Non-modifier
2043	EPHA4	FBgn0025936	eph	10.91	moderate	VDRC	Knockdown	6545	Suppressor	Non-modifier
50848	F11R	FBgn003984	beat VI	0.91	low	VDRC	Knockdown	105798	Enhancer	Lethal
50848	F11R	FBgn0028644	beat-Ic	0.91	low	Genetivision	Duplication	P4-F2	Non-modifier	Suppressor
50848	F11R	FBgn0028644	beat-Ic	0.91	low	VDRC	Knockdown	105066	Non-modifier	Suppressor
50848	F11R	FBgn0038087	beat-Va	0.91	low	Genetivision	Duplication	P15-C9	Suppressor	Non-modifier
2171	FABP5	FBgn0037913	fabp	8.85	moderate	Genetivision	Duplication	P16-A4	Non-modifier	Suppressor
2257	FGF12	FBgn0014135	bnl	2	moderate	Genetivision	Duplication	P15-B6	Suppressor	Suppressor
2257	FGF12	FBgn0014135	bnl	2	moderate	NIG	Knockdown	4608R-1	Non-modifier	Enhancer
2257	FGF12	FBgn0014135	bnl	2	moderate	NIG	Knockdown	4608R-2	Non-modifier	Enhancer
2316	FLNA	FBgn0039500	CG5984	3.01	moderate	Genetivision	Duplication	P13-G11	Non-modifier	Suppressor
2316	FLNA	FBgn0039500	CG5984	3.01	moderate	VDRC	Knockdown	108434	Lethal	Non-modifier
2316	FLNA	FBgn0039500	CG5984	3.01	moderate	VDRC	Knockdown	52489	Suppressor	Non-modifier
2316	FLNA	FBgn0014141	cher	14.75	high	NIG	Knockdown	3937R-4	Suppressor	Non-modifier
2316	FLNA	FBgn0028371	jbug	4.79	moderate	Genetivision	Duplication	P5-H3	Suppressor	Non-modifier
2316	FLNA	FBgn0028371	jbug	4.79	moderate	VDRC	Knockdown	28471	Non-modifier	Suppressor
2316	FLNA	FBgn0028371	jbug	4.79	moderate	VDRC	Knockdown	102221	Lethal	Lethal
2324	FLT4	FBgn0032006	Pvr	9.76	moderate	VDRC	Knockdown	977	Suppressor	Suppressor
2324	FLT4	FBgn0032006	Pvr	9.76	moderate	BDSC	Loss of Function	58431	Suppressor	Suppressor
2324	FLT4	FBgn0032006	Pvr	9.76	moderate	NIG	Knockdown	8222R-2	Non-modifier	Suppressor
2324	FLT4	FBgn0032006	Pvr	9.76	moderate	Genetivision	Duplication	P17-E11	Non-modifier	Non-modifier
2534	FYN	FBgn0264959	Src42A	4.77	moderate	VDRC	Knockdown	26019	Enhancer	Lethal
2534	FYN	FBgn0264959	Src42A	4.77	moderate	BDSC	Overexpression	6410	Lethal	Lethal
2534	FYN	FBgn0262733	Src64B	8.66	high	VDRC	Knockdown	330150	Lethal	Suppressor
2534	FYN	FBgn0262733	Src64B	8.66	high	BDSC	Overexpression	8477	Lethal	Lethal
7855	FZD5	FBgn0027343	fz3	1.85	moderate	BDSC	Duplication	30222	Suppressor	Suppressor
2549	GAB1	FBgn0016794	dos	7.92	high	Genetivision	Duplication	P9-G7	Non-modifier	Suppressor
2561	GABRB2	FBgn0010240	Lcch3	12.8	moderate	VDRC	Knockdown	37408	Enhancer	Non-modifier
2561	GABRB2	FBgn0010240	Lcch3	12.8	moderate	VDRC	Knockdown	109606	Enhancer	Enhancer
2562	GABRB3	FBgn0010240	Lcch3	11.78	moderate	VDRC	Knockdown	37408	Enhancer	Non-modifier
2562	GABRB3	FBgn0010240	Lcch3	11.78	moderate	VDRC	Knockdown	109606	Enhancer	Enhancer
2566	GABRG2	FBgn0030707	CG8916	7.88	moderate	VDRC	Knockdown	9138	Suppressor	Suppressor
2566	GABRG2	FBgn0030707	CG8916	7.88	moderate	VDRC	Knockdown	101633	Suppressor	Non-modifier
2571	GAD1	FBgn0004516	Gad1	12.7	high	BDSC	Loss of Function	37375	Suppressor	Lethal
2571	GAD1	FBgn0004516	Gad1	12.7	high	VDRC	Knockdown	32344	Lethal	Suppressor
2597	GAPDH	FBgn0001091	Gapdh1	13.79	high	VDRC	Knockdown	31631	Non-modifier	Non-modifier
2597	GAPDH	FBgn0001091	Gapdh1	13.79	high	VDRC	Knockdown	31632	Suppressor	Non-modifier
2743	GLRB	FBgn0037950	HisCl1	4.85	high	VDRC	Knockdown	6065	Non-modifier	Non-modifier
2752	GLUL	FBgn0001145	Gs2	13.75	high	VDRC	Knockdown	32929	Suppressor	Non-modifier
2773	GNAI3	FBgn0001104	Galphai	10.69	moderate	VDRC	Knockdown	28150	Suppressor	Non-modifier
2773	GNAI3	FBgn0001104	Galphai	10.69	moderate	Genetivision	Duplication	P9-D6	Suppressor	Non-modifier
2775	GNAO1	FBgn0001122	Galphao	14.75	high	VDRC	Knockdown	19124	Suppressor	Suppressor
2775	GNAO1	FBgn0001122	Galphao	14.75	high	VDRC	Knockdown	110552	Suppressor	Non-modifier
2775	GNAO1	FBgn0001122	Galphao	14.75	high	NIG	Knockdown	2204R-2	Non-modifier	Non-modifier
10681	GNB5	FBgn0030011	Gbeta5	13.8	high	VDRC	Knockdown	108261	Enhancer	Non-modifier
2791	GNG11	FBgn0004921	Ggamma1	6.02	moderate	Genetivision	Duplication	P7-F4	Suppressor	Non-modifier
2791	GNG11	FBgn0004921	Ggamma1	6.02	moderate	BDSC	Overexpression	44601	Non-modifier	Suppressor
2911	GRM1	FBgn0019985	mGluR	2.84	moderate	VDRC	Knockdown	1793	Non-modifier	Suppressor
2911	GRM1	FBgn0019985	mGluR	2.84	moderate	VDRC	Knockdown	103736	Suppressor	Enhancer
2911	GRM1	FBgn0019985	mGluR	2.84	moderate	NIG	Knockdown	11144R-3	Suppressor	Suppressor
2911	GRM1	FBgn0050361	mtt	2.87	moderate	VDRC	Knockdown	102982	Suppressor	Non-modifier
2911	GRM1	FBgn0050361	mtt	2.87	moderate	VDRC	Knockdown	330081	Non-modifier	Suppressor
2915	GRM5	FBgn0019985	mGluR	2.84	moderate	VDRC	Knockdown	1793	Non-modifier	Suppressor
2915	GRM5	FBgn0019985	mGluR	2.84	moderate	VDRC	Knockdown	103736	Suppressor	Enhancer
2915	GRM5	FBgn0019985	mGluR	2.84	moderate	NIG	Knockdown	11144R-3	Suppressor	Suppressor
2915	GRM5	FBgn0050361	mtt	2.87	moderate	VDRC	Knockdown	102982	Suppressor	Non-modifier
2915	GRM5	FBgn0050361	mtt	2.87	moderate	VDRC	Knockdown	330081	Non-modifier	Suppressor
2971	GTF3A	FBgn0030787	CG9609	7.74	high	BDSC	Duplication	30429	Suppressor	Suppressor
2977	GUCY1A2	FBgn0013972	Gycalpha99B	13.8	high	VDRC	Knockdown	107074	Enhancer	Non-modifier
3065	HDAC1	FBgn0015805	HDAC1	14.75	high	VDRC	Knockdown	30599	Enhancer	Lethal
3065	HDAC1	FBgn0015805	HDAC1	14.75	high	VDRC	Knockdown	30600	Suppressor	Non-modifier
3065	HDAC1	FBgn0015805	HDAC1	14.75	high	Genetivision	Duplication	P14-D8	Enhancer	Suppressor
3065	HDAC1	FBgn0015805	HDAC1	14.75	high	Genetivision	Duplication	P12-B12	Non-modifier	Suppressor
3280	HES1	FBgn0010109	dpn	7.87	high	Genetivision	Duplication	P7-H2	Non-modifier	Suppressor
3280	HES1	FBgn0010109	dpn	7.87	high	BDSC	Duplication	65295	Suppressor	Suppressor
3280	HES1	FBgn0010109	dpn	7.87	high	VDRC	Knockdown	106181	Non-modifier	Non-modifier
3280	HES1	FBgn0001168	h	7.89	moderate	Genetivision	Duplication	P9-H7	Non-modifier	Suppressor
9026	HIP1R	FBgn0036309	Hip1	11.8	high	Genetivision	Duplication	P9-G3	Suppressor	Non-modifier
9026	HIP1R	FBgn0036309	Hip1	11.8	high	Genetivision	Duplication	P11-E4	Non-modifier	Non-modifier
3178	HNRNPA1	FBgn0001215	Hrb98DE	10.81	moderate	Genetivision	Duplication	P15-E6	Suppressor	Non-modifier
220988	HNRNPA3	FBgn0001215	Hrb98DE	10.81	moderate	Genetivision	Duplication	P15-E6	Suppressor	Non-modifier
4670	HNRNPM	FBgn0267790	rump	9.88	moderate	Genetivision	Duplication	P6-A11	Suppressor	Suppressor
3265	HRAS	FBgn0003205	Ras85D	12.79	High	VDRC	Knockdown	106642	Suppressor	Lethal
9653	HS2ST1	FBgn0024230	Hs2st	14.75	high	VDRC	Knockdown	37123	Non-modifier	Suppressor
6782	HSPA13	FBgn0266599	Hsc70-4	0.9	low	BDSC	Duplication	P15-H5	Suppressor	Suppressor
6782	HSPA13	FBgn0266599	Hsc70-4	0.9	low	NIG	Knockdown	4264R-2	Suppressor	Lethal
6782	HSPA13	FBgn0001230	Hsp68	0.9	low	VDRC	Knockdown	47145	Non-modifier	Enhancer
3306	HSPA2	FBgn0266599	Hsc70-4	6.65	moderate	VDRC	Knockdown	101734	Suppressor	Non-modifier
3480	IGF1R	FBgn0283499	InR	11.83	high	VDRC	Knockdown	991	Non-modifier	Non-modifier
3480	IGF1R	FBgn0283499	InR	11.83	high	VDRC	Knockdown	992	Suppressor	Enhancer
3480	IGF1R	FBgn0283499	InR	11.83	high	BDSC	Overexpression	8262	Non-modifier	Lethal
3486	IGFBP3	FBgn0262169	magu	0.91	low	BDSC	Duplication	P5-D8	Suppressor	Non-modifier
3486	IGFBP3	FBgn0262169	magu	0.91	low	VDRC	Knockdown	106494	Non-modifier	Enhancer
3625	INHBB	FBgn0024913	Actbeta	9.9	high	VDRC	Knockdown	12174	Non-modifier	Non-modifier
3643	INSR	FBgn0283499	InR	9.88	moderate	VDRC	Knockdown	991	Non-modifier	Non-modifier
3643	INSR	FBgn0283499	InR	9.88	moderate	VDRC	Knockdown	992	Suppressor	Enhancer
3643	INSR	FBgn0283499	InR	9.88	moderate	BDSC	Overexpression	8262	Non-modifier	Lethal
32661	ITGA2	FBgn0001250	if	2.93	moderate	BDSC	Loss of Function	3960	Non-modifier	Suppressor
32661	ITGA2	FBgn0001250	if	2.93	moderate	VDRC	Knockdown	100770	Enhancer	Non-modifier
3691	ITGB4	FBgn0004657	mys	4.85	moderate	BDSC	Duplication	30312	Lethal	Lethal
3693	ITGB5	FBgn0004657	mys	4.85	moderate	BDSC	Duplication	30312	Lethal	Lethal
6453	ITSN1	FBgn0023388	Dap160	13.8	high	VDRC	Knockdown	16158	Enhancer	Non-modifier
6453	ITSN1	FBgn0023388	Dap160	13.8	high	VDRC	Knockdown	106689	Enhancer	Lethal
50618	ITSN2	FBgn0023388	Dap160	12.8	moderate	VDRC	Knockdown	16158	Enhancer	Non-modifier
50618	ITSN2	FBgn0023388	Dap160	12.8	moderate	VDRC	Knockdown	106689	Enhancer	Lethal
3725	JUN	FBgn0001291	Jra	11.79	high	Genetivision	Duplication	P5-A2	Non-modifier	Non-modifier
3725	JUN	FBgn0001291	Jra	11.79	high	VDRC	Knockdown	107997	Non-modifier	Enhancer
3725	JUN	FBgn0001291	Jra	11.79	high	BDSC	Duplication	7216	Suppressor	Suppressor
3725	JUN	FBgn0001291	Jra	11.79	high	VDRC	Knockdown	2275R-2	Suppressor	Suppressor
8997	KALRN	FBgn0024277	trio	10.89	moderate	VDRC	Knockdown	40137	Non-modifier	Enhancer
8997	KALRN	FBgn0024277	trio	10.89	moderate	VDRC	Knockdown	40138	Suppressor	Enhancer
3736	KCNA1	FBgn0003380	Sh	12.79	high	VDRC	Knockdown	23673	Non-modifier	Suppressor
3736	KCNA1	FBgn0003380	Sh	12.79	high	BDSC	Loss of Function	111	Non-modifier	Non-modifier
3736	KCNA1	FBgn0003380	Sh	12.79	high	VDRC	Knockdown	104474	Non-modifier	Non-modifier
3736	KCNA1	FBgn0003380	Sh	12.79	high	Genetivision	Duplication	P11-A12	Suppressor	Suppressor
8514	KCNAB2	FBgn0263220	Hk	12.74	high	VDRC	Knockdown	21054	Enhancer	Non-modifier
8514	KCNAB2	FBgn0263220	Hk	12.74	high	VDRC	Knockdown	101402	Enhancer	Non-modifier
3745	KCNB1	FBgn0262593	Shab	8.88	high	VDRC	Knockdown	102218	Non-modifier	Non-modifier
3746	KCNC1	FBgn0003386	Shaw	12.82	high	VDRC	Knockdown	110589	Non-modifier	Lethal
3746	KCNC1	FBgn0003386	Shaw	12.82	high	Genetivision	Duplication	P3-51	Non-modifier	Enhancer
30819	KCNIP2	FBgn0039380	CG5890	8.77	moderate	VDRC	Knockdown	105766	Suppressor	Non-modifier
596	KCNK1	FBgn0262685	CG43155	3	high	VDRC	Knockdown	37516	Suppressor	Non-modifier
56479	KCNQ5	FBgn0033494	KCNQ	8.88	moderate	VDRC	Knockdown	8754	Non-modifier	Lethal
56479	KCNQ5	FBgn0033494	KCNQ	8.88	moderate	VDRC	Knockdown	12215R-1	Non-modifier	Lethal
23303	KIF13B	FBgn0019968	Khc-73	12.79	high	Genetivision	Duplication	P8-B6	Non-modifier	Suppressor
90293	KLHL13	FBgn0031119	CG1812	3.01	moderate	VDRC	Knockdown	15491	Non-modifier	Non-modifier
90293	KLHL13	FBgn0031119	CG1812	3.01	moderate	VDRC	Knockdown	104656	Lethal	Enhancer
3908	LAMA2	FBgn0261563	wb	8.96	moderate	Genetivision	Duplication	P4-G10	Non-modifier	Non-modifier
3908	LAMA2	FBgn0261563	wb	8.96	moderate	VDRC	Knockdown	108020	Lethal	Non-modifier
3908	LAMA2	FBgn0261563	wb	8.96	moderate	VDRC	Knockdown	3141	Non-modifier	Enhancer
3908	LAMA2	FBgn0261563	wb	8.96	moderate	VDRC	Knockdown	102919	Non-modifier	Non-modifier
3915	LAMC1	FBgn0267348	LanB2	10.9	high	VDRC	Knockdown	42560	Suppressor	Suppressor
51056	LAP3	FBgn0259795	loopin-1	7.71	moderate	Genetivision	Duplication	P6-G11	Non-modifier	Non-modifier
51056	LAP3	FBgn0033860	S-Lap5	7.71	moderate	Genetivision	Duplication	P5-E11	Non-modifier	Non-modifier
51056	LAP3	FBgn0033860	S-Lap5	7.71	moderate	VDRC	Knockdown	105866	Suppressor	Enhancer
51056	LAP3	FBgn0033868	S-Lap7	7.71	moderate	Genetivision	Duplication	P5-H7	Non-modifier	Non-modifier
51056	LAP3	FBgn0034132	S-Lap8	7.71	moderate	Genetivision	Duplication	P7-A4	Suppressor	Non-modifier
9113	LATS1	FBgn0011739	wts	10.79	high	VDRC	Knockdown	106174	Enhancer	Enhancer
64130	LIN7B	FBgn0039269	veli	12.9	high	VDRC	Knockdown	110556	Non-modifier	Non-modifier
149998	LIPI	FBgn0250847	CG14034	2.98	moderate	VDRC	Knockdown	100114	Enhancer	Non-modifier
4008	LMO7	FBgn0263346	CG43427	2.96	high	VDRC	Knockdown	100636	Suppressor	Suppressor
4008	LMO7	FBgn0263346	CG43427	2.96	high	Genetivision	Duplication	P14-B11	Non-modifier	Non-modifier
254531	LPCAT4	FBgn0052699	LPCAT	5.81	moderate	VDRC	Knockdown	32924	Non-modifier	Suppressor
4036	LRP2	FBgn0261260	mgl	10.99	high	VDRC	Knockdown	27242	Suppressor	Non-modifier
4036	LRP2	FBgn0261260	mgl	10.99	high	VDRC	Knockdown	105071	Enhancer	Non-modifier
4036	LRP2	FBgn0261260	mgl	10.99	high	BDSC	Duplication	30330	Suppressor	Suppressor
4067	LYN	FBgn0262733	Src64B	6.7	moderate	VDRC	Knockdown	330150	Lethal	Suppressor
4067	LYN	FBgn0262733	Src64B	6.7	moderate	BDSC	Overexpression	8477	Lethal	Lethal
6416	MAP2K4	FBgn0024326	Mkk4	14.75	high	VDRC	Knockdown	26929	Non-modifier	Non-modifier
9448	MAP4K4	FBgn0010909	msn	8.73	moderate	Genetivision	Duplication	P6-C6	Suppressor	Suppressor
5594	MAPK1	FBgn0003256	rl	14.75	high	VDRC	Knockdown	35642	Suppressor	Lethal
5594	MAPK1	FBgn0003256	rl	14.75	high	VDRC	Knockdown	109573	Wing Phenotype	Non-modifier
5594	MAPK1	FBgn0003256	rl	14.75	high	BDSC	Overexpression	36270	Suppressor	Non-modifier
5594	MAPK1	FBgn0003256	rl	14.75	high	BDSC	Consitutively Active	59006	Non-modifier	Suppressor
4628	MYH10	FBgn0265434	zip	14.75	high	VDRC	Knockdown	330299	Lethal	Lethal
4633	MYL2	FBgn0002773	mlc2	3.46	high	BDSC	Loss of Function	4416	Non-modifier	Suppressor
4637	MYL6	FBgn0004687	Mlc-c	12.78	high	BDSC	Duplication	30281	Non-modifier	Suppressor
4637	MYL6	FBgn0004687	Mlc-c	12.78	high	VDRC	Knockdown	107177	Suppressor	Non-modifier
4637	MYL6	FBgn0004687	Mlc-c	12.78	high	VDRC	Knockdown	31160	Enhancer	Enhancer
4644	MYO5A	FBgn0261397	didum	12.79	high	VDRC	Knockdown	44291	Suppressor	Enhancer
23114	NFASC	FBgn0264975	nrg	9.74	moderate	VDRC	Knockdown	107991	Lethal	Enhancer
4780	NFE2L2	FBgn0262975	cnc	6.03	moderate	VDRC	Knockdown	101235	Suppressor	Lethal
4780	NFE2L2	FBgn0262975	cnc	6.03	moderate	Genetivision	Duplication	P15-A1	Non-modifier	Non-modifier
4780	NFE2L2	FBgn0262975	cnc	6.03	moderate	VDRC	Knockdown	37673	Suppressor	Non-modifier
4830	NME1	FBgn0000150	awd	12.8	high	VDRC	Knockdown	330072	Lethal	Non-modifier
4830	NME1	FBgn0000150	awd	12.8	high	VDRC	Knockdown	110782	Suppressor	Suppressor
29922	NME7	FBgn0028997	nmdyn-D7	13.74	high	VDRC	Knockdown	35901	Suppressor	Suppressor
29922	NME7	FBgn0028997	nmdyn-D7	13.74	high	VDRC	Knockdown	35903	Suppressor	Non-modifier
4842	NOS1	FBgn0011676	Nos	12.72	high	VDRC	Knockdown	108433	Non-modifier	Enhancer
4842	NOS1	FBgn0011676	Nos	12.72	high	VDRC	Knockdown	330380	Non-modifier	Suppressor
4854	NOTCH3	FBgn0004647	N	9.67	moderate	BDSC	Duplication	38513	Suppressor	Non-modifier
4854	NOTCH3	FBgn0004647	N	9.67	moderate	BDSC	Overexpression	52309	Lethal	Lethal
4862	NPAS2	FBgn0023076	Clk	10.89	moderate	VDRC	Knockdown	42833	Non-modifier	Suppressor
4862	NPAS2	FBgn0023076	Clk	10.89	moderate	VDRC	Knockdown	104507	Non-modifier	Enhancer
4862	NPAS2	FBgn0023076	Clk	10.89	moderate	NIG	Knockdown	7391R-3	Non-modifier	Suppressor
2908	NR3C1	FBgn0035849	ERR	2.11	moderate	Genetivision	Duplication	P9-D1	Non-modifier	Suppressor
2908	NR3C1	FBgn0035849	ERR	2.11	moderate	NIG	Knockdown	7404R-2	Non-modifier	Non-modifier
9378	NRXN1	FBgn0038975	Nrx-1	12.8	high	VDRC	Knockdown	4306	Non-modifier	Non-modifier
9378	NRXN1	FBgn0038975	Nrx-1	12.8	high	VDRC	Knockdown	36326	Non-modifier	Suppressor
9378	NRXN1	FBgn0038975	Nrx-1	12.8	high	BDSC	Loss of Function	61696	Non-modifier	Suppressor
9379	NRXN2	FBgn0038975	Nrx-1	11.77	moderate	VDRC	Knockdown	4306	Non-modifier	Non-modifier
9379	NRXN2	FBgn0038975	Nrx-1	11.77	moderate	VDRC	Knockdown	36326	Non-modifier	Suppressor
9379	NRXN2	FBgn0038975	Nrx-1	11.77	moderate	BDSC	Loss of Function	61696	Non-modifier	Suppressor
9369	NRXN3	FBgn0038975	Nrx-1	11.77	moderate	VDRC	Knockdown	4306	Non-modifier	Non-modifier
9369	NRXN3	FBgn0038975	Nrx-1	11.77	moderate	VDRC	Knockdown	36326	Non-modifier	Suppressor
9369	NRXN3	FBgn0038975	Nrx-1	11.77	moderate	BDSC	Loss of Function	61696	Non-modifier	Suppressor
4915	NTRK2	FBgn0004839	otk	0.9	low	VDRC	Knockdown	30833	Non-modifier	Suppressor
4915	NTRK2	FBgn0004839	otk	0.9	low	Genetivision	Duplication	P5-D9	Non-modifier	Non-modifier
4915	NTRK2	FBgn0004839	otk	0.9	low	BDSC	Loss of Function	59688	Non-modifier	Suppressor
4915	NTRK2	FBgn0004839	otk	0.9	low	NIG	Knockdown	8967R-2	Suppressor	Suppressor
4915	NTRK2	FBgn0004839	otk	0.9	low	NIG	Knockdown	8967R-4	Suppressor	Suppressor
4915	NTRK2	FBgn0010407	Ror	0.9	low	VDRC	Knockdown	932	Non-modifier	Non-modifier
4915	NTRK2	FBgn0010407	Ror	0.9	low	VDRC	Knockdown	29930	Suppressor	Suppressor
10215	OLIG2	FBgn0023091	dimm	1.1	low	Genetivision	Duplication	P7-E4	Suppressor	Non-modifier
10215	OLIG2	FBgn0032651	Oli	11.79	high	Genetivision	Duplication	P4-H3	Suppressor	Non-modifier
5048	PAFAH1B1	FBgn0015754	Lis-1	13.75	high	VDRC	Knockdown	6216	Non-modifier	Suppressor
5058	PAK1	FBgn0267698	Pak	12.74	high	VDRC	Knockdown	108937	Non-modifier	Enhancer
5062	PAK2	FBgn0267698	Pak	9.69	moderate	Genetivision	Duplication	P13-F11	Suppressor	Suppressor
5062	PAK2	FBgn0267698	Pak	9.69	moderate	BDSC	Overexpression	52299	Non-modifier	Non-modifier
5063	PAK3	FBgn0267698	Pak	10.79	moderate	VDRC	Knockdown	108937	Non-modifier	Enhancer
8800	PEX11A	FBgn0034058	Pex11	11.9	moderate	Genetivision	Duplication	P6-B10	Non-modifier	Suppressor
5286	PIK3C2A	FBgn0015278	Pi3K68D	11.71	high	Genetivision	Duplication	P9-E10	Non-modifier	Suppressor
5293	PIK3CD	FBgn0015279	Pi3K92E	13.75	high	VDRC	Knockdown	38985	Non-modifier	Enhancer
5305	PIP4K2A	FBgn0039924	PIP4K	12.8	moderate	BDSC	Duplication	38507	Lethal	Non-modifier
5362	PLXNA2	FBgn0025741	PlexA	12.85	high	VDRC	Knockdown	4740	Suppressor	Non-modifier
5362	PLXNA2	FBgn0025741	PlexA	12.85	high	VDRC	Knockdown	107004	Non-modifier	Non-modifier
5362	PLXNA2	FBgn0025741	PlexA	12.85	high	NIG	Knockdown	11081R-2	Suppressor	Suppressor
23654	PLXNB2	FBgn0025740	PlexB	4.85	moderate	BDSC	Overexpression	65743	Non-modifier	Suppressor
23654	PLXNB2	FBgn0025740	PlexB	4.85	moderate	VDRC	Knockdown	6873	Non-modifier	Non-modifier
23654	PLXNB2	FBgn0025740	PlexB	4.85	moderate	BDSC	Duplication	42031	Suppressor	Suppressor
5434	POLR2E	FBgn0033571	Rpb5	12.78	high	VDRC	Knockdown	105248	Lethal	Lethal
5527	PPP2R5C	FBgn0042693	PP2A-B'	11.8	high	VDRC	Knockdown	22615	Suppressor	Non-modifier
5528	PPP2R5D	FBgn0042693	PP2A-B'	11.77	high	VDRC	Knockdown	22615	Suppressor	Non-modifier
5567	PRKACB	FBgn0000273	Pka-C1	13.8	high	VDRC	Knockdown	101524	Suppressor	Non-modifier
5567	PRKACB	FBgn0000273	Pka-C1	13.8	high	VDRC	Knockdown	330111	Lethal	Suppressor
5567	PRKACB	FBgn0000273	Pka-C1	13.8	high	BDSC	Loss of Function	43833	Non-modifier	Non-modifier
5578	PRKCA	FBgn0003091	Pkc53E	13.74	high	VDRC	Knockdown	27696	Non-modifier	Non-modifier
5578	PRKCA	FBgn0003091	Pkc53E	13.74	high	VDRC	Knockdown	27699	Suppressor	Suppressor
5580	PRKCD	FBgn0259680	Pkcdelta	11.84	high	VDRC	Knockdown	33838	Non-modifier	Non-modifier
5580	PRKCD	FBgn0259680	Pkcdelta	11.84	high	VDRC	Knockdown	101029	Non-modifier	Non-modifier
5581	PRKCE	FBgn0003093	pkc98E	13.82	high	VDRC	Knockdown	33434	Non-modifier	Non-modifier
5582	PRKCG	FBgn0003091	Pkc53E	9.76	moderate	VDRC	Knockdown	27696	Non-modifier	Non-modifier
5582	PRKCG	FBgn0003091	Pkc53E	9.76	moderate	VDRC	Knockdown	27699	Suppressor	Suppressor
5872	RAB13	FBgn0015789	Rab10	3.94	moderate	BDSC	Duplication	32282	Non-modifier	Non-modifier
5872	RAB13	FBgn0015789	Rab10	3.94	moderate	VDRC	Knockdown	46791	Suppressor	Non-modifier
5872	RAB13	FBgn0262518	Rab8	3.94	moderate	Genetivision	Duplication	P10-H10	Non-modifier	Suppressor
5872	RAB13	FBgn0262518	Rab8	3.94	moderate	BDSC	Overexpression	9782	Non-modifier	Non-modifier
23551	RASD2	FBgn0035733	CG8641	9.96	moderate	VDRC	Knockdown	35993	Non-modifier	Suppressor
5970	RELA	FBgn0260632	dl	8.73	high	VDRC	Knockdown	105491	Non-modifier	Enhancer
5970	RELA	FBgn0260632	dl	8.73	high	VDRC	Knockdown	45998	Suppressor	Non-modifier
5970	RELA	FBgn0260632	dl	8.73	high	Genetivision	Duplication	P17-B1	Non-modifier	Suppressor
5996	RGS1	FBgn0028743	Dhit	3.84	moderate	Genetivision	Duplication	P7-H12	Non-modifier	Non-modifier
23221	RHOBTB2	FBgn0036980	RhoBTB	12.77	high	VDRC	Knockdown	100815	Wing Phenotype	Suppressor
23221	RHOBTB2	FBgn0036980	RhoBTB	12.77	high	VDRC	Knockdown	330130	Suppressor	Suppressor
389	RHOC	FBgn0014020	Rho1	10.8	moderate	VDRC	Knockdown	12734	Lethal	Lethal
389	RHOC	FBgn0014020	Rho1	10.8	moderate	VDRC	Knockdown	109420	Enhancer	Lethal
389	RHOC	FBgn0014020	Rho1	10.8	moderate	BDSC	Overexpression	28872	Lethal	Lethal
389	RHOC	FBgn0014020	Rho1	10.8	moderate	Genetivision	Duplication	P5-B11	Suppressor	Suppressor
389	RHOC	FBgn0014020	Rho1	10.8	moderate	NIG	Knockdown	1004R-3	Enhancer	Enhancer
22999	RIMS1	FBgn0053547	Rim	8.97	moderate	VDRC	Knockdown	39384	Suppressor	Non-modifier
22999	RIMS1	FBgn0053547	Rim	8.97	moderate	VDRC	Knockdown	39385	Suppressor	Suppressor
22999	RIMS1	FBgn0053547	Rim	8.97	moderate	NIG	Knockdown	7321R-1	Non-modifier	Suppressor
6092	ROBO2	FBgn0005631	robo1	10.7	high	BDSC	Loss of Function	59485	Non-modifier	Non-modifier
27330	RPS6KA6	FBgn0262866	S6kII	9.88	moderate	BDSC	Overexpression	8714	Non-modifier	Suppressor
860	RUNX2	FBgn0002576	lz	4.91	moderate	BDSC	Duplication	30328	Suppressor	Non-modifier
860	RUNX2	FBgn0002576	lz	4.91	moderate	BDSC	DUplication	33836	Lethal	Lethal
860	RUNX2	FBgn0003300	run	6.97	high	VDRC	Knockdown	330063	Lethal	Lethal
860	RUNX2	FBgn0003300	run	6.97	high	BDSC	Duplication	64827	Lethal	Suppressor
860	RUNX2	FBgn0083981	RunxA	5.87	moderate	BDSC	Duplication	30250	Non-modifier	Enhancer
6256	RXRA	FBgn0003964	usp	11.87	high	BDSC	Duplication	38672	Non-modifier	Suppressor
6256	RXRA	FBgn0003964	usp	11.87	high	BDSC	Duplication	30231	Suppressor	Suppressor
6256	RXRA	FBgn0003964	usp	11.87	high	NIG	Knockdown	4380R-1	Lethal	Lethal
6256	RXRA	FBgn0003964	usp	11.87	high	NIG	Knockdown	4380R-3	Enhancer	Lethal
6262	RYR2	FBgn0011286	RyR	13.8	high	VDRC	Knockdown	109631	Lethal	Non-modifier
6303	SAT1	FBgn0040798	CG13069	1.01	low	Genetivision	Duplication	P9-C4	Suppressor	Non-modifier
6303	SAT1	FBgn0040798	CG4210	13.74	high	Genetivision	Duplication	P14-A11	Lethal	Lethal
6323	SCN1A	FBgn0264255	para	10.94	moderate	VDRC	Knockdown	6131	Non-modifier	Non-modifier
6323	SCN1A	FBgn0264255	para	10.94	moderate	VDRC	Knockdown	104775	Lethal	Suppressor
5414	SEPT4	FBgn0259923	SEPT4	12.8	high	BDSC	Duplication	30427	Suppressor	Suppressor
55752	SEPTIN11	FBgn0026361	Sep5	11.78	moderate	VDRC	Knockdown	25456	Non-modifier	Suppressor
5414	SEPTIN4	FBgn0259923	Sept4	10.77	high	VDRC	Knockdown	7742	Wing Phenotype	Non-modifier
989	SEPTIN7	FBgn0013726	pnut	14.75	high	VDRC	Knockdown	330714	Suppressor	Suppressor
989	SEPTIN7	FBgn0013726	pnut	14.75	high	VDRC	Knockdown	11791	Suppressor	Suppressor
5265	SERPINA1	FBgn0033115	Spn42De	3.02	moderate	VDRC	Knockdown	24036	Non-modifier	Non-modifier
5265	SERPINA1	FBgn0033115	Spn42De	3.02	moderate	VDRC	Knockdown	102622	Suppressor	Suppressor
143686	SESN3	FBgn0034897	Sesn	13.8	high	VDRC	Knockdown	38481	Non-modifier	Non-modifier
9353	SLIT2	FBgn0264089	sli	12.79	moderate	VDRC	Knockdown	108853	Non-modifier	Suppressor
4090	SMAD5	FBgn0011648	Mad	9.81	moderate	BDSC	Duplication	P7-H12	Non-modifier	Non-modifier
8773	SNAP23	FBgn0266720	Snap24	9.84	moderate	Genetivision	Duplication	P10-A2	Non-modifier	Non-modifier
8773	SNAP23	FBgn0266720	Snap24	9.84	moderate	VDRC	Knockdown	48033	Non-modifier	Enhancer
8773	SNAP23	FBgn0266720	Snap24	9.84	moderate	VDRC	Knockdown	48034	Non-modifier	Non-modifier
8773	SNAP23	FBgn0011288	Snap25	7.84	moderate	VDRC	Knockdown	330641	Lethal	Enhancer
8773	SNAP23	FBgn0011288	Snap25	7.84	moderate	NIG	Knockdown	17676R-1	Suppressor	Suppressor
8773	SNAP23	FBgn0011288	Snap25	7.84	moderate	NIG	Knockdown	17676R-4	Suppressor	Non-modifier
51429	SNX9	FBgn0040475	SH3PX1	7.91	moderate	Genetivision	Duplication	P10-A2	Non-modifier	Non-modifier
51429	SNX9	FBgn0040475	SH3PX1	7.91	moderate	NIG	Knockdown	6757R-8	Suppressor	Suppressor
51429	SNX9	FBgn0040475	SH3PX1	7.91	moderate	NIG	Knockdown	6757R-2	Suppressor	Suppressor
6654	SOS1	FBgn0001965	Sos	14.75	high	Genetivision	Duplication	P4-B4	Non-modifier	Non-modifier
6712	SPTBN2	FBgn0250788	beta-Spec	12.8	high	VDRC	Knockdown	42053	Suppressor	Non-modifier
6712	SPTBN2	FBgn0250788	beta-Spec	12.8	high	VDRC	Knockdown	42054	Lethal	Enhancer
6712	SPTBN2	FBgn0250788	beta-Spec	12.8	high	NIG	Knockdown	5870R-1	Enhancer	Enhancer
9295	SRSF11	FBgn0024285	Srp54	7.88	moderate	Genetivision	Duplication	P6-A11	Suppressor	Suppressor
9295	SRSF11	FBgn0024285	Srp54	7.88	moderate	VDRC	Knockdown	330235	Non-modifier	Suppressor
6428	SRSF3	FBgn0260944	Rbp1	7.79	high	VDRC	Knockdown	110008	Non-modifier	Enhancer
6428	SRSF3	FBgn0030479	Rbp1-like	6.78	moderate	VDRC	Knockdown	105883	Enhancer	Enhancer
6428	SRSF3	FBgn0028554	x16	7.8	moderate	VDRC	Knockdown	330430	Non-modifier	Suppressor
10735	STAG2	FBgn0020616	SA	10.76	moderate	VDRC	Knockdown	5594	Suppressor	Suppressor
6773	STAT2	FBgn0016917	Stat92E	3.01	moderate	VDRC	Knockdown	43866	Non-modifier	Enhancer
6773	STAT2	FBgn0016917	Stat92E	3.01	moderate	VDRC	Knockdown	43867	Non-modifier	Lethal
6857	SYT1	FBgn0004242	Syt1	12.79	high	VDRC	Knockdown	100608	Enhancer	Enhancer
6857	SYT1	FBgn0004242	Syt1	12.79	high	VDRC	Knockdown	33113	Lethal	Lethal
57586	SYT13	FBgn0261090	Sytbeta	2.84	moderate	VDRC	Knockdown	30013	Non-modifier	Non-modifier
8826	TAGLN3	FBgn0002789	Mp20	8.88	high	Genetivision	Duplication	P7-A8	Non-modifier	Non-modifier
7018	TF	FBgn0036299	Tsf2	9.98	moderate	VDRC	Knockdown	5236	Lethal	Lethal
7018	TF	FBgn0036299	Tsf2	9.98	moderate	NIG	Knockdown	10620R-2	Suppressor	Non-modifier
7018	TF	FBgn0034094	Tsf3	3.92	moderate	Genetivision	Duplication	P5-B12	Non-modifier	Non-modifier
7018	TF	FBgn0034094	Tsf3	3.92	moderate	VDRC	Knockdown	330101	Non-modifier	Suppressor
7040	TGFB1	FBgn0031461	daw	4.9	high	VDRC	Knockdown	105309	Non-modifier	Suppressor
7040	TGFB1	FBgn0031461	daw	4.9	high	Genetivision	Duplication	P6-C12	Suppressor	Enhancer
7042	TGFB2	FBgn0031461	daw	3.89	moderate	VDRC	Knockdown	105309	Non-modifier	Suppressor
7042	TGFB2	FBgn0031461	daw	3.89	moderate	Genetivision	Duplication	P13-F4	Suppressor	Suppressor
7074	TIAM1	FBgn0085447	sif	9.71	high	NIG	Knockdown	5406R-3	Non-modifier	Suppressor
7074	TIAM1	FBgn0085447	sif	9.71	high	NIG	Knockdown	5406R-2	Suppressor	Suppressor
7078	TIMP3	FBgn0025879	Timp	11.87	high	VDRC	Knockdown	109427	Suppressor	Suppressor
7078	TIMP3	FBgn0025879	Timp	11.87	high	VDRC	Knockdown	15372	Non-modifier	Suppressor
7078	TIMP3	FBgn0025879	Timp	11.87	high	BDSC	Overexpression	58707	Non-modifier	Enhancer
7078	TIMP3	FBgn0025879	Timp	11.87	high	Genetivision	Duplication	P13-F7	Non-modifier	Non-modifier
7082	TJP1	FBgn0262614	pyd	9.86	high	VDRC	Knockdown	38863	Suppressor	Non-modifier
7082	TJP1	FBgn0262614	pyd	9.86	high	NIG	Knockdown	9763R-2	Non-modifier	Non-modifier
7100	TLR5	FBgn0036978	Toll-9	2.11	low	VDRC	Knockdown	109635	Non-modifier	Enhancer
7111	TMOD1	FBgn0082582	tmod	12.84	high	VDRC	Knockdown	32601	Lethal	Enhancer
3371	TNC	FBgn0030163	CG1791	2.84	moderate	BDSC	Duplication	30833	Enhancer	Non-modifier
29896	TRA2A	FBgn0003742	tra2	10.8	moderate	Genetivision	Duplication	P5-E1	Non-modifier	Enhancer
7187	TRAF3	FBgn0030748	Traf-like	1.94	moderate	VDRC	Knockdown	34835	Non-modifier	Non-modifier
7187	TRAF3	FBgn0026319	Traf4	2.04	moderate	Genetivision	Duplication	P3-79	Non-modifier	Non-modifier
7187	TRAF3	FBgn0026319	Traf4	2.04	moderate	VDRC	Knockdown	21213	Non-modifier	Enhancer
7277	TUBA4A	FBgn0003886	alphaTub85E	4.91	moderate	VDRC	Knockdown	330369	Suppressor	Lethal
7320	UBE2B	FBgn0004436	Ubc6	12.8	high	VDRC	Knockdown	23229	Enhancer	Non-modifier
7320	UBE2B	FBgn0004436	Ubc6	12.8	high	VDRC	Knockdown	46927	Non-modifier	Non-modifier
7320	UBE2B	FBgn0004436	Ubc6	12.8	high	VDRC	Knockdown	23230	Enhancer	Non-modifier
7323	UBE2D3	FBgn0011217	eff	12.82	high	VDRC	Knockdown	105731	Enhancer	Lethal
7323	UBE2D3	FBgn0011217	eff	12.82	high	BDSC	Overexpression	26691	Non-modifier	Non-modifier
7323	UBE2D3	FBgn0011217	eff	12.82	high	Genetivision	Duplication	P10-H5	Non-modifier	Non-modifier
9341	VAMP3	FBgn0013342	nSyb	7.84	moderate	Genetivision	Duplication	P9-H12	Suppressor	Non-modifier
9341	VAMP3	FBgn0013342	nSyb	7.84	moderate	VDRC	Knockdown	104531	Lethal	Enhancer
9341	VAMP3	FBgn0013342	nSyb	7.84	moderate	BDSC	Overexpression	6922	Wing Phenotype	Enhancer
9341	VAMP3	FBgn0013342	nSyb	7.84	moderate	NIG	Knockdown	17248R-1	Lethal	Lethal
7416	VDAC1	FBgn0004363	porin	12.8	moderate	VDRC	Knockdown	330138	Suppressor	Lethal
7436	VLDLR	FBgn0051092	LpR2	10.84	high	VDRC	Knockdown	25684	Non-modifier	Non-modifier
7436	VLDLR	FBgn0051092	LpR2	10.84	high	VDRC	Knockdown	107597	Non-modifier	Non-modifier
7450	VWF	FBgn0029167	Hml	4.87	high	Genetivision	Duplication	P15-E5	Suppressor	Non-modifier
7450	VWF	FBgn0029167	Hml	4.87	high	VDRC	Duplication	37005	Non-modifier	Non-modifier
23286	WWC1	FBgn0262127	kibra	12.8	high	BDSC	Loss of Function	19424	Non-modifier	Non-modifier
23286	WWC1	FBgn0262127	kibra	12.8	high	BDSC	Loss of Function	40175	Non-modifier	Suppressor
10413	YAP	FBgn0034970	yki	10.74	high	BDSC	Loss of Function	26142	Suppressor	Non-modifier
10413	YAP	FBgn0034970	yki	10.74	high	BDSC	Overexpression	28816	Non-modifier	Suppressor
10413	YAP	FBgn0034970	yki	10.74	high	VDRC	Knockdown	40497	Non-modifier	Enhancer
7525	YES1	FBgn0262733	Src64B	6.7	moderate	VDRC	Knockdown	330150	Lethal	Suppressor
7525	YES1	FBgn0262733	Src64B	6.7	moderate	BDSC	Overexpression	8477	Lethal	Lethal
7704	ZBTB16	FBgn0037275	CG14655	0.91	low	VDRC	Knockdown	13136	Non-modifier	Enhancer
7704	ZBTB16	FBgn0037275	CG14655	0.91	low	VDRC	Knockdown	104293	Suppressor	Enhancer
7704	ZBTB16	FBgn0037275	CG14655	0.91	low	NIG	Knockdown	14655R-3	Non-modifier	Non-modifier
7704	ZBTB16	FBgn0033186	CG1602	1.1	low	Genetivision	Duplication	P3-73	Non-modifier	Non-modifier
7704	ZBTB16	FBgn0033186	CG1602	1.1	low	BDSC	Duplication	59970	Suppressor	Suppressor
7704	ZBTB16	FBgn0001180	hb	1.1	low	Genetivision	Duplication	P15-F9	Suppressor	Suppressor
7704	ZBTB16	FBgn0259789	zld	1.1	low	BDSC	Duplication	51350	Suppressor	Suppressor
