# Supplementary material for: Downregulation of glial genes involved in synaptic function mitigates Huntington's disease pathogenesis
Source: eLife. 2021 Apr 19;10:e64564. doi: 10.7554/eLife.64564 (PMC8149125; doi:10.7554/eLife.64564)
Supplement: Supplementary file 6. [file elife-64564-supp6.xlsx]

## Sheet: Sheet1
					mHTT Expressed in Neurons and Glia		mHTT Expressed in Neurons		mHTT Expressed in Glia
Stock	Repository	Fly Gene	Human Gene	Effect	Time+Genotype	Time*Genotype	Time+Genotype	Time*Genotype	Time+Genotype	Time*Genotype
330714	VDRC	pnt	SEPT7	Knockdown	4.1376e-19	0.00107958	1.50684e-15	4.84701e-05	9.71616e-07	0.0499304
9138	VDRC	CG8916	GABRG2	Knockdown	3.03434e-13	0.0074789	0.028899	0.485531	4.33778e-10	9.50554e-06
P12-C12	Genetivision	DnaJ-1	DNAJB1	Duplication	1.5199e-08	0.333126	1.40757e-07	0.0068345	1.33852e-06	0.532292
P15-E3	Genetivision	CG7461	ACADVL	Duplication	7.11761e-11	0.070478	2.201e-05	0.00578866	0.000333362	0.364329
102622	VDRC	Spn42De	SERPINA1	Knockdown	1.26577e-12	0.0552588	4.0889e-13	2.6508e-05	2.11881e-10	0.157876
51350	BDSC	zld	ZBTB16	Duplication	5.60725e-14	0.0422908	2.31424e-14	0.00117785	2.70725e-05	0.00133765
P6-C6	Genetivision	msn	MAP4K4	Duplication	9.60361e-15	0.20032	0.0117459	3.09092e-11	2.29374e-28	1.64727e-07
30429	BDSC	CG9609	GTF3A	Duplication	7.93476e-15	0.00599371	2.61962e-17	7.40284e-06	9.87132e-06	0.00120675
977	VDRC	pvr	FLT4	Knockdown	1.92876e-17	0.000123598	8.147e-16	0.00054188	0.0003336	0.115101
30775	BDSC	AnxB10	ANXA1	Duplication	5.72386e-17	0.0568843	3.27709e-20	5.47805e-08	1.42191e-09	0.911184
30282	BDSC	CG32640	DNAJB1	Duplication	3.1076e-21	0.00313661	5.63416e-14	0.000211695	1.24277e-08	6.54194e-11
65295	BDSC	dpn	HES1	Duplication	5.18885e-20	0.000333053	9.39556e-15	0.000566262	5.84409e-14	0.0553537
330130	VDRC	RhoBTB	RHOBTB2	Knockdown	6.13223e-18	0.00219887	2.17625e-14	0.000149695	1.42979e-06	2.8646e-05
35901	VDRC	nmdyn-D7	NME7	Knockdown	1.37526e-22	0.131715	1.04237e-26	0.000259559	0.0588091	0.00164426
46933	VDRC	mahe	DDX17	Knockdown	8.55082e-18	0.0150488	5.4438e-14	1.67955e-05	4.19888e-11	0.10941
102057	VDRC	CG43373	ADCY5	Knockdown	9.44403e-29	0.00793371	0.00154675	0.109064	0.000205578	0.000360287
6757R-8	NIG	SH3PX1	SNX9	Knockdown	1.63626e-14	6.24395e-08	3.4942e-32	6.27034e-17	1.70979e-25	9.31479e-07
8567	BDSC	abl	ABL1	Duplication	2.64058e-16	0.000238765	1.91264e-17	0.00068665	0.000183386	0.00255238
100636	VDRC	CG43427	LMO7	Knockdown	2.47401e-20	3.15668e-08	1.50258e-16	2.11989e-05	2.33742e-05	5.35181e-05
5406R-2	NIG	sif	TIAM1	Knockdown	1.053e-17	2.77612e-05	4.12847e-07	0.000340123	2.01318e-17	2.91298e-06
32289	BDSC	Atf3	ATF3	Duplication	9.16541e-28	2.22428e-05	5.58441e-09	6.001e-06	1.47943e-17	0.519422
30231	BDSC	usp	RXRA	Duplication	3.74777e-26	0.000429663	3.82104e-08	0.00637596	3.10351e-07	0.0638061
17676R-1	NIG	Snap25	SNAP23	Knockdown	0.000596854	9.16464e-07	4.21334e-17	1.54049e-08	1.55698e-09	6.22555e-06
11081R-2	NIG	PlexA	PLXNA2	Knockdown	3.39482e-22	0.00114105	1.55698e-09	6.22555e-06	9.84448e-13	0.357451
27699	VDRC	Pkc53E	PRKCA	Knockdown	4.51464e-13	0.00190285	9.10446e-07	0.00770971	0.09803	0.01026
66169	BDSC	ena	ENAH	Overexpression	1.21841e-06	1.58765e-14	8.89146e-14	1.97227e-09	1.34693e-08	0.791025
19193	BDSC	AnxB10	ANXA1	Overexpression	1.90578e-31	1.99861e-06	2.72316e-13	0.10254	2.04632e-06	0.0173503
2275R-2	NIG	jra	JUN	Knockdown	1.07268e-07	9.09297e-13	1.39911e-07	2.35087e-09	3.9045e-14	8.52818e-06
9109	BDSC	tsr	CFL2	LOF	1.52697e-10	3.1295e-09	7.43648e-25	1.57298e-13	5.09593e-36	8.40042e-12
